# Supplementary material for: The cell proliferation antigen Ki-67 organises heterochromatin
Source: eLife. 2016 Mar 7;5:e13722. doi: 10.7554/eLife.13722 (PMC4841783; doi:10.7554/eLife.13722)
Supplement: Figure 6—source data 1. — Table showing proteins identified by mass spectrometry eluted from immunoprecipitates of cells transfected with FLAG-tagged Ki-67, an unrelated protein (FLAG-tagged TRIM39) or empty vector. Proteins specifically interacting only with Ki-67 are presented on the first worksheet. Data are available via ProteomeXchange with identifier PXD003551. DOI: http://dx.doi.org/10.7554/eLife.13722.025 [file elife-13722-fig6-data1.xls]

## Sheet: legend
Set	Location	Search Result	Parameters	Proteins	Peptides
A	2014.06.04_Ki67 IP Michal/Empty Vector/"Combined MS/MS spectra"	Maxis_Homo sapiens-1_Mascot_2014-06-05 10:15:30		503	3602
B	2014.06.04_Ki67 IP Michal/Ki67/"Combined MS/MS spectra"	Maxis_Homo sapiens-1_Mascot_2014-06-05 13:38:12		1127	9590
C	2014.06.04_Ki67 IP Michal/TRIM/"Combined MS/MS spectra"	Maxis_Homo sapiens-1_Mascot_2014-06-05 13:38:12		904	7030

## Sheet: Ki67 interacting
			Mascot Score			No of peptides			Sequence coverage %
Row	Accession	Name	empty vector	Ki67	TRIM	empty vector	Ki67	TRIM	empty vector	Ki67	TRIM
1	Q8TDD1	ATP-dependent RNA helicase DDX54 OS=Homo sapiens GN=DDX54 PE=1 SV=2	0.0	752.8	0.0	0	15	0	0.0	23.6	0.0
2	Q9BZE4	Nucleolar GTP-binding protein 1 OS=Homo sapiens GN=GTPBP4 PE=1 SV=3	0.0	742.9	0.0	0	15	0	0.0	27.9	0.0
3	Q99613	Eukaryotic translation initiation factor 3 subunit C OS=Homo sapiens GN=EIF3C PE=1 SV=1	0.0	551.6	0.0	0	14	0	0.0	16.3	0.0
4	Q969Z0	Protein TBRG4 OS=Homo sapiens GN=TBRG4 PE=1 SV=1	0.0	398.4	0.0	0	11	0	0.0	16.8	0.0
5	Q15397	Pumilio domain-containing protein KIAA0020 OS=Homo sapiens GN=KIAA0020 PE=1 SV=3	0.0	488.2	0.0	0	10	0	0.0	19.8	0.0
6	Q9H4M9	EH domain-containing protein 1 OS=Homo sapiens GN=EHD1 PE=1 SV=2	0.0	547.6	0.0	0	10	0	0.0	22.1	0.0
7	P62910	60S ribosomal protein L32 OS=Homo sapiens GN=RPL32 PE=1 SV=2	0.0	338.4	0.0	0	10	0	0.0	37.8	0.0
8	Q9Y5J1	U3 small nucleolar RNA-associated protein 18 homolog OS=Homo sapiens GN=UTP18 PE=1 SV=3	0.0	344.1	0.0	0	9	0	0.0	18.5	0.0
9	Q8WTT2	Nucleolar complex protein 3 homolog OS=Homo sapiens GN=NOC3L PE=1 SV=1	0.0	323.6	0.0	0	9	0	0.0	12.6	0.0
10	Q9NY93	Probable ATP-dependent RNA helicase DDX56 OS=Homo sapiens GN=DDX56 PE=1 SV=1	0.0	350.1	0.0	0	9	0	0.0	13.5	0.0
11	Q96T58	Msx2-interacting protein OS=Homo sapiens GN=SPEN PE=1 SV=1	0.0	271.9	0.0	0	8	0	0.0	2.8	0.0
12	Q52LR7	Enhancer of polycomb homolog 2 OS=Homo sapiens GN=EPC2 PE=1 SV=2	0.0	279.4	0.0	0	8	0	0.0	13.8	0.0
13	Q1ED39	Lysine-rich nucleolar protein 1 OS=Homo sapiens GN=KNOP1 PE=1 SV=1	0.0	321.0	0.0	0	8	0	0.0	19.7	0.0
14	Q92769	Histone deacetylase 2 OS=Homo sapiens GN=HDAC2 PE=1 SV=2	0.0	403.2	0.0	0	8	0	0.0	19.7	0.0
15	Q01831	DNA repair protein complementing XP-C cells OS=Homo sapiens GN=XPC PE=1 SV=4	0.0	261.8	0.0	0	8	0	0.0	10.0	0.0
16	O43395	U4/U6 small nuclear ribonucleoprotein Prp3 OS=Homo sapiens GN=PRPF3 PE=1 SV=2	0.0	276.8	0.0	0	8	0	0.0	15.1	0.0
17	O95793	Double-stranded RNA-binding protein Staufen homolog 1 OS=Homo sapiens GN=STAU1 PE=1 SV=2	0.0	320.3	0.0	0	8	0	0.0	15.3	0.0
18	Q8NDF8	PAP-associated domain-containing protein 5 OS=Homo sapiens GN=PAPD5 PE=1 SV=2	0.0	326.1	0.0	0	8	0	0.0	20.1	0.0
19	O75691	Small subunit processome component 20 homolog OS=Homo sapiens GN=UTP20 PE=1 SV=3	0.0	340.3	0.0	0	7	0	0.0	3.0	0.0
20	P08240	Signal recognition particle receptor subunit alpha OS=Homo sapiens GN=SRPR PE=1 SV=2	0.0	218.1	0.0	0	7	0	0.0	15.0	0.0
21	P49750	YLP motif-containing protein 1 OS=Homo sapiens GN=YLPM1 PE=1 SV=3	0.0	216.4	0.0	0	6	0	0.0	4.6	0.0
22	Q6P9B9	Integrator complex subunit 5 OS=Homo sapiens GN=INTS5 PE=1 SV=1	0.0	172.1	0.0	0	6	0	0.0	6.9	0.0
23	Q6KC79	Nipped-B-like protein OS=Homo sapiens GN=NIPBL PE=1 SV=2	0.0	249.6	0.0	0	6	0	0.0	2.6	0.0
24	Q9UQR1	Zinc finger protein 148 OS=Homo sapiens GN=ZNF148 PE=1 SV=2	0.0	272.3	0.0	0	6	0	0.0	12.8	0.0
25	P38432	Coilin OS=Homo sapiens GN=COIL PE=1 SV=1	0.0	250.0	0.0	0	6	0	0.0	13.2	0.0
26	Q9H4L4	Sentrin-specific protease 3 OS=Homo sapiens GN=SENP3 PE=1 SV=2	0.0	250.1	0.0	0	6	0	0.0	11.7	0.0
27	Q99575	Ribonucleases P/MRP protein subunit POP1 OS=Homo sapiens GN=POP1 PE=1 SV=2	0.0	273.0	0.0	0	6	0	0.0	9.8	0.0
28	P51116	Fragile X mental retardation syndrome-related protein 2 OS=Homo sapiens GN=FXR2 PE=1 SV=2	0.0	313.9	0.0	0	6	0	0.0	12.0	0.0
29	P49959	Double-strand break repair protein MRE11A OS=Homo sapiens GN=MRE11A PE=1 SV=3	0.0	257.3	0.0	0	6	0	0.0	12.0	0.0
30	O15213	WD repeat-containing protein 46 OS=Homo sapiens GN=WDR46 PE=1 SV=3	0.0	186.9	0.0	0	6	0	0.0	13.8	0.0
31	Q9NQ55	Suppressor of SWI4 1 homolog OS=Homo sapiens GN=PPAN PE=1 SV=1	0.0	216.4	0.0	0	6	0	0.0	12.9	0.0
32	Q9H7B2	Ribosome production factor 2 homolog OS=Homo sapiens GN=RPF2 PE=1 SV=2	0.0	154.2	0.0	0	6	0	0.0	20.6	0.0
33	O15047	Histone-lysine N-methyltransferase SETD1A OS=Homo sapiens GN=SETD1A PE=1 SV=3	0.0	279.0	0.0	0	6	0	0.0	5.2	0.0
34	Q96I24	Far upstream element-binding protein 3 OS=Homo sapiens GN=FUBP3 PE=1 SV=2	0.0	180.4	0.0	0	6	0	0.0	11.0	0.0
35	Q92925	SWI/SNF-related matrix-associated actin-dependent regulator of chromatin subfamily D member 2 OS=Homo sapiens GN=SMARCD2 PE=1 SV=3	0.0	291.7	0.0	0	6	0	0.0	14.5	0.0
36	Q9H6F5	Coiled-coil domain-containing protein 86 OS=Homo sapiens GN=CCDC86 PE=1 SV=1	0.0	178.5	0.0	0	6	0	0.0	18.1	0.0
37	Q9Y6K5	2'-5'-oligoadenylate synthase 3 OS=Homo sapiens GN=OAS3 PE=1 SV=3	0.0	262.0	0.0	0	6	0	0.0	6.9	0.0
38	Q92804	TATA-binding protein-associated factor 2N OS=Homo sapiens GN=TAF15 PE=1 SV=1	0.0	229.9	0.0	0	5	0	0.0	14.2	0.0
39	Q2KHR3	Glutamine and serine-rich protein 1 OS=Homo sapiens GN=QSER1 PE=1 SV=3	0.0	361.3	0.0	0	5	0	0.0	4.3	0.0
40	Q8IWI9	MAX gene-associated protein OS=Homo sapiens GN=MGA PE=1 SV=3	0.0	248.2	0.0	0	5	0	0.0	1.9	0.0
41	Q9NV31	U3 small nucleolar ribonucleoprotein protein IMP3 OS=Homo sapiens GN=IMP3 PE=1 SV=1	0.0	218.7	0.0	0	5	0	0.0	25.5	0.0
42	Q8N9T8	Protein KRI1 homolog OS=Homo sapiens GN=KRI1 PE=1 SV=3	0.0	234.2	0.0	0	5	0	0.0	8.3	0.0
43	Q9Y6J9	TAF6-like RNA polymerase II p300/CBP-associated factor-associated factor 65 kDa subunit 6L OS=Homo sapiens GN=TAF6L PE=1 SV=1	0.0	179.8	0.0	0	5	0	0.0	11.7	0.0
44	Q8N6H7	ADP-ribosylation factor GTPase-activating protein 2 OS=Homo sapiens GN=ARFGAP2 PE=1 SV=1	0.0	197.0	0.0	0	5	0	0.0	10.7	0.0
45	Q13535	Serine/threonine-protein kinase ATR OS=Homo sapiens GN=ATR PE=1 SV=3	0.0	214.3	0.0	0	5	0	0.0	2.3	0.0
46	Q9BVJ6	U3 small nucleolar RNA-associated protein 14 homolog A OS=Homo sapiens GN=UTP14A PE=1 SV=1	0.0	205.1	0.0	0	5	0	0.0	8.6	0.0
47	Q9UKV3	Apoptotic chromatin condensation inducer in the nucleus OS=Homo sapiens GN=ACIN1 PE=1 SV=2	0.0	260.4	0.0	0	5	0	0.0	4.8	0.0
48	P82663	28S ribosomal protein S25, mitochondrial OS=Homo sapiens GN=MRPS25 PE=1 SV=1	0.0	106.4	0.0	0	5	0	0.0	26.0	0.0
49	P18583	Protein SON OS=Homo sapiens GN=SON PE=1 SV=4	0.0	206.3	0.0	0	5	0	0.0	2.8	0.0
50	Q8WVB6	Chromosome transmission fidelity protein 18 homolog OS=Homo sapiens GN=CHTF18 PE=1 SV=1	0.0	249.6	0.0	0	5	0	0.0	7.8	0.0
51	O15371	Eukaryotic translation initiation factor 3 subunit D OS=Homo sapiens GN=EIF3D PE=1 SV=1	0.0	214.8	0.0	0	5	0	0.0	10.0	0.0
52	Q07020	60S ribosomal protein L18 OS=Homo sapiens GN=RPL18 PE=1 SV=2	0.0	227.3	0.0	0	4	0	0.0	22.9	0.0
53	Q9H9L3	Interferon-stimulated 20 kDa exonuclease-like 2 OS=Homo sapiens GN=ISG20L2 PE=1 SV=1	0.0	144.9	0.0	0	4	0	0.0	14.7	0.0
54	Q15050	Ribosome biogenesis regulatory protein homolog OS=Homo sapiens GN=RRS1 PE=1 SV=2	0.0	193.5	0.0	0	4	0	0.0	13.4	0.0
55	Q00577	Transcriptional activator protein Pur-alpha OS=Homo sapiens GN=PURA PE=1 SV=2	0.0	161.0	0.0	0	4	0	0.0	21.7	0.0
56	Q9HCK8	Chromodomain-helicase-DNA-binding protein 8 OS=Homo sapiens GN=CHD8 PE=1 SV=5	0.0	354.1	0.0	0	4	0	0.0	2.1	0.0
57	Q5T3I0	G patch domain-containing protein 4 OS=Homo sapiens GN=GPATCH4 PE=1 SV=2	0.0	152.4	0.0	0	4	0	0.0	16.1	0.0
58	Q15287	RNA-binding protein with serine-rich domain 1 OS=Homo sapiens GN=RNPS1 PE=1 SV=1	0.0	151.8	0.0	0	4	0	0.0	11.8	0.0
59	Q96JB5	CDK5 regulatory subunit-associated protein 3 OS=Homo sapiens GN=CDK5RAP3 PE=1 SV=2	0.0	201.6	0.0	0	4	0	0.0	14.8	0.0
60	Q9H3U1	Protein unc-45 homolog A OS=Homo sapiens GN=UNC45A PE=1 SV=1	0.0	185.8	0.0	0	4	0	0.0	4.9	0.0
61	P27635	60S ribosomal protein L10 OS=Homo sapiens GN=RPL10 PE=1 SV=4	0.0	138.8	0.0	0	4	0	0.0	17.3	0.0
62	Q13243	Serine/arginine-rich splicing factor 5 OS=Homo sapiens GN=SRSF5 PE=1 SV=1	0.0	134.9	0.0	0	4	0	0.0	18.4	0.0
63	P55884	Eukaryotic translation initiation factor 3 subunit B OS=Homo sapiens GN=EIF3B PE=1 SV=3	0.0	154.8	0.0	0	4	0	0.0	3.8	0.0
64	Q460N5	Poly [ADP-ribose] polymerase 14 OS=Homo sapiens GN=PARP14 PE=1 SV=3	0.0	151.2	0.0	0	4	0	0.0	2.7	0.0
65	Q9UBL3	Set1/Ash2 histone methyltransferase complex subunit ASH2 OS=Homo sapiens GN=ASH2L PE=1 SV=1	0.0	161.3	0.0	0	4	0	0.0	9.1	0.0
66	Q15291	Retinoblastoma-binding protein 5 OS=Homo sapiens GN=RBBP5 PE=1 SV=2	0.0	184.8	0.0	0	4	0	0.0	9.3	0.0
67	P52294	Importin subunit alpha-5 OS=Homo sapiens GN=KPNA1 PE=1 SV=3	0.0	226.2	0.0	0	4	0	0.0	11.0	0.0
68	O75448	Mediator of RNA polymerase II transcription subunit 24 OS=Homo sapiens GN=MED24 PE=1 SV=1	0.0	160.7	0.0	0	4	0	0.0	5.2	0.0
69	Q1KMD3	Heterogeneous nuclear ribonucleoprotein U-like protein 2 OS=Homo sapiens GN=HNRNPUL2 PE=1 SV=1	0.0	136.0	0.0	0	4	0	0.0	4.3	0.0
70	Q6RFH5	WD repeat-containing protein 74 OS=Homo sapiens GN=WDR74 PE=1 SV=1	0.0	134.4	0.0	0	4	0	0.0	14.3	0.0
71	Q6PJT7	Zinc finger CCCH domain-containing protein 14 OS=Homo sapiens GN=ZC3H14 PE=1 SV=1	0.0	179.0	0.0	0	4	0	0.0	7.5	0.0
72	O43707	Alpha-actinin-4 OS=Homo sapiens GN=ACTN4 PE=1 SV=2	0.0	358.7	0.0	0	4	0	0.0	6.4	0.0
73	Q8N3Z6	Zinc finger CCHC domain-containing protein 7 OS=Homo sapiens GN=ZCCHC7 PE=1 SV=2	0.0	113.9	0.0	0	4	0	0.0	9.8	0.0
74	Q06265	Exosome complex component RRP45 OS=Homo sapiens GN=EXOSC9 PE=1 SV=3	0.0	118.5	0.0	0	4	0	0.0	10.7	0.0
75	Q9UHR4	Brain-specific angiogenesis inhibitor 1-associated protein 2-like protein 1 OS=Homo sapiens GN=BAIAP2L1 PE=1 SV=2	0.0	232.3	0.0	0	4	0	0.0	11.0	0.0
76	Q53F19	Uncharacterized protein C17orf85 OS=Homo sapiens GN=C17orf85 PE=1 SV=2	0.0	106.2	0.0	0	4	0	0.0	7.6	0.0
77	P61586	Transforming protein RhoA OS=Homo sapiens GN=RHOA PE=1 SV=1	0.0	94.8	0.0	0	4	0	0.0	25.4	0.0
78	Q9NVI7	ATPase family AAA domain-containing protein 3A OS=Homo sapiens GN=ATAD3A PE=1 SV=2	0.0	188.4	0.0	0	4	0	0.0	7.4	0.0
79	Q9Y3C6	Peptidyl-prolyl cis-trans isomerase-like 1 OS=Homo sapiens GN=PPIL1 PE=1 SV=1	0.0	79.6	0.0	0	4	0	0.0	18.7	0.0
80	P54198	Protein HIRA OS=Homo sapiens GN=HIRA PE=1 SV=2	0.0	162.4	0.0	0	4	0	0.0	4.4	0.0
81	O15294	UDP-N-acetylglucosamine--peptide N-acetylglucosaminyltransferase 110 kDa subunit OS=Homo sapiens GN=OGT PE=1 SV=3	0.0	104.7	0.0	0	4	0	0.0	4.8	0.0
82	Q99959	Plakophilin-2 OS=Homo sapiens GN=PKP2 PE=1 SV=2	0.0	160.9	0.0	0	4	0	0.0	6.9	0.0
83	Q8IVW6	AT-rich interactive domain-containing protein 3B OS=Homo sapiens GN=ARID3B PE=1 SV=2	0.0	96.0	0.0	0	3	0	0.0	5.2	0.0
84	Q96PZ2	Protein FAM111A OS=Homo sapiens GN=FAM111A PE=1 SV=2	0.0	81.5	0.0	0	3	0	0.0	7.9	0.0
85	P46939	Utrophin OS=Homo sapiens GN=UTRN PE=1 SV=2	0.0	122.2	0.0	0	3	0	0.0	1.2	0.0
86	P82650	28S ribosomal protein S22, mitochondrial OS=Homo sapiens GN=MRPS22 PE=1 SV=1	0.0	75.5	0.0	0	3	0	0.0	6.9	0.0
87	Q15554	Telomeric repeat-binding factor 2 OS=Homo sapiens GN=TERF2 PE=1 SV=2	0.0	193.2	0.0	0	3	0	0.0	11.0	0.0
88	Q5VZL5	Zinc finger MYM-type protein 4 OS=Homo sapiens GN=ZMYM4 PE=1 SV=1	0.0	84.2	0.0	0	3	0	0.0	2.5	0.0
89	Q96FV9	THO complex subunit 1 OS=Homo sapiens GN=THOC1 PE=1 SV=1	0.0	109.7	0.0	0	3	0	0.0	4.9	0.0
90	P49711	Transcriptional repressor CTCF OS=Homo sapiens GN=CTCF PE=1 SV=1	0.0	114.2	0.0	0	3	0	0.0	5.5	0.0
91	Q9UKL0	REST corepressor 1 OS=Homo sapiens GN=RCOR1 PE=1 SV=1	0.0	83.8	0.0	0	3	0	0.0	10.0	0.0
92	Q9NWT1	p21-activated protein kinase-interacting protein 1 OS=Homo sapiens GN=PAK1IP1 PE=1 SV=2	0.0	123.5	0.0	0	3	0	0.0	9.7	0.0
93	Q9UH17	DNA dC->dU-editing enzyme APOBEC-3B OS=Homo sapiens GN=APOBEC3B PE=1 SV=1	0.0	103.3	0.0	0	3	0	0.0	9.7	0.0
94	P78345	Ribonuclease P protein subunit p38 OS=Homo sapiens GN=RPP38 PE=1 SV=2	0.0	130.8	0.0	0	3	0	0.0	13.4	0.0
95	Q9NV06	DDB1- and CUL4-associated factor 13 OS=Homo sapiens GN=DCAF13 PE=1 SV=2	0.0	116.6	0.0	0	3	0	0.0	6.1	0.0
96	Q9NPI1	Bromodomain-containing protein 7 OS=Homo sapiens GN=BRD7 PE=1 SV=1	0.0	125.9	0.0	0	3	0	0.0	8.0	0.0
97	Q9UBU9	Nuclear RNA export factor 1 OS=Homo sapiens GN=NXF1 PE=1 SV=1	0.0	157.8	0.0	0	3	0	0.0	6.9	0.0
98	Q86Y91	Kinesin-like protein KIF18B OS=Homo sapiens GN=KIF18B PE=1 SV=3	0.0	121.3	0.0	0	3	0	0.0	3.7	0.0
99	Q99496	E3 ubiquitin-protein ligase RING2 OS=Homo sapiens GN=RNF2 PE=1 SV=1	0.0	113.0	0.0	0	3	0	0.0	12.5	0.0
100	O94842	TOX high mobility group box family member 4 OS=Homo sapiens GN=TOX4 PE=1 SV=1	0.0	90.7	0.0	0	3	0	0.0	8.1	0.0
101	Q9HAN9	Nicotinamide mononucleotide adenylyltransferase 1 OS=Homo sapiens GN=NMNAT1 PE=1 SV=1	0.0	157.9	0.0	0	3	0	0.0	12.5	0.0
102	Q9BTC0	Death-inducer obliterator 1 OS=Homo sapiens GN=DIDO1 PE=1 SV=5	0.0	94.7	0.0	0	3	0	0.0	1.5	0.0
103	P36776	Lon protease homolog, mitochondrial OS=Homo sapiens GN=LONP1 PE=1 SV=2	0.0	117.0	0.0	0	3	0	0.0	3.5	0.0
104	Q9P0U4	CpG-binding protein OS=Homo sapiens GN=CXXC1 PE=1 SV=2	0.0	96.8	0.0	0	3	0	0.0	5.6	0.0
105	Q9NQZ2	Something about silencing protein 10 OS=Homo sapiens GN=UTP3 PE=1 SV=1	0.0	154.6	0.0	0	3	0	0.0	9.2	0.0
106	P62241	40S ribosomal protein S8 OS=Homo sapiens GN=RPS8 PE=1 SV=2	0.0	202.9	0.0	0	3	0	0.0	17.8	0.0
107	P35637	RNA-binding protein FUS OS=Homo sapiens GN=FUS PE=1 SV=1	0.0	186.2	0.0	0	3	0	0.0	9.9	0.0
108	Q9UIV1	CCR4-NOT transcription complex subunit 7 OS=Homo sapiens GN=CNOT7 PE=1 SV=3	0.0	133.3	0.0	0	3	0	0.0	14.0	0.0
109	Q9H9A7	RecQ-mediated genome instability protein 1 OS=Homo sapiens GN=RMI1 PE=1 SV=3	0.0	103.2	0.0	0	3	0	0.0	7.2	0.0
110	O00410	Importin-5 OS=Homo sapiens GN=IPO5 PE=1 SV=4	0.0	134.7	0.0	0	3	0	0.0	3.6	0.0
111	Q86XZ4	Spermatogenesis-associated serine-rich protein 2 OS=Homo sapiens GN=SPATS2 PE=1 SV=1	0.0	116.1	0.0	0	3	0	0.0	8.3	0.0
112	Q13492	Phosphatidylinositol-binding clathrin assembly protein OS=Homo sapiens GN=PICALM PE=1 SV=2	0.0	129.6	0.0	0	3	0	0.0	5.8	0.0
113	Q8IVF7	Formin-like protein 3 OS=Homo sapiens GN=FMNL3 PE=1 SV=3	0.0	125.4	0.0	0	3	0	0.0	3.6	0.0
114	Q9NP72	Ras-related protein Rab-18 OS=Homo sapiens GN=RAB18 PE=1 SV=1	0.0	131.8	0.0	0	3	0	0.0	18.9	0.0
115	P27482	Calmodulin-like protein 3 OS=Homo sapiens GN=CALML3 PE=1 SV=2	0.0	158.9	0.0	0	3	0	0.0	24.2	0.0
116	Q9H4H8	Protein FAM83D OS=Homo sapiens GN=FAM83D PE=1 SV=3	0.0	89.1	0.0	0	3	0	0.0	4.8	0.0
117	Q14444	Caprin-1 OS=Homo sapiens GN=CAPRIN1 PE=1 SV=2	0.0	138.2	0.0	0	3	0	0.0	4.8	0.0
118	O60566	Mitotic checkpoint serine/threonine-protein kinase BUB1 beta OS=Homo sapiens GN=BUB1B PE=1 SV=3	0.0	108.9	0.0	0	3	0	0.0	3.0	0.0
119	P48594	Serpin B4 OS=Homo sapiens GN=SERPINB4 PE=1 SV=2	0.0	536.4	0.0	0	3	0	0.0	12.6	0.0
120	P61604	10 kDa heat shock protein, mitochondrial OS=Homo sapiens GN=HSPE1 PE=1 SV=2	0.0	99.5	0.0	0	3	0	0.0	35.3	0.0
121	Q12874	Splicing factor 3A subunit 3 OS=Homo sapiens GN=SF3A3 PE=1 SV=1	0.0	143.0	0.0	0	3	0	0.0	6.0	0.0
122	Q9Y5B6	PAX3- and PAX7-binding protein 1 OS=Homo sapiens GN=PAXBP1 PE=1 SV=2	0.0	116.2	0.0	0	3	0	0.0	4.6	0.0
123	P32969	60S ribosomal protein L9 OS=Homo sapiens GN=RPL9 PE=1 SV=1	0.0	113.2	0.0	0	3	0	0.0	22.9	0.0
124	P49454	Centromere protein F OS=Homo sapiens GN=CENPF PE=1 SV=2	0.0	162.4	0.0	0	3	0	0.0	0.9	0.0
125	Q15022	Polycomb protein SUZ12 OS=Homo sapiens GN=SUZ12 PE=1 SV=3	0.0	101.7	0.0	0	3	0	0.0	4.3	0.0
126	Q96JP5	E3 ubiquitin-protein ligase ZFP91 OS=Homo sapiens GN=ZFP91 PE=1 SV=1	0.0	110.0	0.0	0	3	0	0.0	10.0	0.0
127	Q9UJX2	Cell division cycle protein 23 homolog OS=Homo sapiens GN=CDC23 PE=1 SV=3	0.0	171.9	0.0	0	3	0	0.0	5.5	0.0
128	O75529	TAF5-like RNA polymerase II p300/CBP-associated factor-associated factor 65 kDa subunit 5L OS=Homo sapiens GN=TAF5L PE=1 SV=1	0.0	126.6	0.0	0	3	0	0.0	7.5	0.0
129	Q96PV6	Leukocyte receptor cluster member 8 OS=Homo sapiens GN=LENG8 PE=1 SV=2	0.0	116.8	0.0	0	3	0	0.0	4.6	0.0
130	P31151	Protein S100-A7 OS=Homo sapiens GN=S100A7 PE=1 SV=4	0.0	126.5	0.0	0	3	0	0.0	22.8	0.0
131	Q13123	Protein Red OS=Homo sapiens GN=IK PE=1 SV=3	0.0	97.6	0.0	0	3	0	0.0	6.3	0.0
132	A1A4S6	Rho GTPase-activating protein 10 OS=Homo sapiens GN=ARHGAP10 PE=1 SV=1	0.0	116.0	0.0	0	3	0	0.0	4.3	0.0
133	P51531	Probable global transcription activator SNF2L2 OS=Homo sapiens GN=SMARCA2 PE=1 SV=2	0.0	541.3	0.0	0	3	0	0.0	1.9	0.0
134	Q13769	THO complex subunit 5 homolog OS=Homo sapiens GN=THOC5 PE=1 SV=2	0.0	121.4	0.0	0	3	0	0.0	4.7	0.0
135	Q9UQB8	Brain-specific angiogenesis inhibitor 1-associated protein 2 OS=Homo sapiens GN=BAIAP2 PE=1 SV=1	0.0	146.2	0.0	0	3	0	0.0	6.7	0.0
136	Q969S2	Endonuclease 8-like 2 OS=Homo sapiens GN=NEIL2 PE=1 SV=3	0.0	65.0	0.0	0	2	0	0.0	8.4	0.0
137	A6NIE6	Putative RRN3-like protein RRN3P2 OS=Homo sapiens GN=RRN3P2 PE=5 SV=3	0.0	81.6	0.0	0	2	0	0.0	5.0	0.0
138	Q8WUB8	PHD finger protein 10 OS=Homo sapiens GN=PHF10 PE=1 SV=3	0.0	51.5	0.0	0	2	0	0.0	3.4	0.0
139	Q93096	Protein tyrosine phosphatase type IVA 1 OS=Homo sapiens GN=PTP4A1 PE=1 SV=2	0.0	87.4	0.0	0	2	0	0.0	13.9	0.0
140	O60563	Cyclin-T1 OS=Homo sapiens GN=CCNT1 PE=1 SV=1	0.0	67.4	0.0	0	2	0	0.0	5.2	0.0
141	Q96I25	Splicing factor 45 OS=Homo sapiens GN=RBM17 PE=1 SV=1	0.0	46.1	0.0	0	2	0	0.0	3.7	0.0
142	Q6UB35	Monofunctional C1-tetrahydrofolate synthase, mitochondrial OS=Homo sapiens GN=MTHFD1L PE=1 SV=1	0.0	75.2	0.0	0	2	0	0.0	2.4	0.0
143	Q96MW7	Tigger transposable element-derived protein 1 OS=Homo sapiens GN=TIGD1 PE=1 SV=1	0.0	90.7	0.0	0	2	0	0.0	4.7	0.0
144	Q9BWJ5	Splicing factor 3B subunit 5 OS=Homo sapiens GN=SF3B5 PE=1 SV=1	0.0	45.5	0.0	0	2	0	0.0	17.4	0.0
145	Q53GS9	U4/U6.U5 tri-snRNP-associated protein 2 OS=Homo sapiens GN=USP39 PE=1 SV=2	0.0	121.1	0.0	0	2	0	0.0	6.0	0.0
146	Q6PK04	Coiled-coil domain-containing protein 137 OS=Homo sapiens GN=CCDC137 PE=1 SV=1	0.0	141.1	0.0	0	2	0	0.0	9.7	0.0
147	P62906	60S ribosomal protein L10a OS=Homo sapiens GN=RPL10A PE=1 SV=2	0.0	55.0	0.0	0	2	0	0.0	7.4	0.0
148	Q16656	Nuclear respiratory factor 1 OS=Homo sapiens GN=NRF1 PE=1 SV=1	0.0	93.7	0.0	0	2	0	0.0	4.0	0.0
149	Q14566	DNA replication licensing factor MCM6 OS=Homo sapiens GN=MCM6 PE=1 SV=1	0.0	68.7	0.0	0	2	0	0.0	2.8	0.0
150	P19447	TFIIH basal transcription factor complex helicase XPB subunit OS=Homo sapiens GN=ERCC3 PE=1 SV=1	0.0	53.0	0.0	0	2	0	0.0	5.4	0.0
151	Q96JC1	Vam6/Vps39-like protein OS=Homo sapiens GN=VPS39 PE=1 SV=2	0.0	65.2	0.0	0	2	0	0.0	2.9	0.0
152	Q9Y4A0	Jerky protein homolog-like OS=Homo sapiens GN=JRKL PE=2 SV=2	0.0	71.2	0.0	0	2	0	0.0	6.5	0.0
153	Q9H5Q4	Dimethyladenosine transferase 2, mitochondrial OS=Homo sapiens GN=TFB2M PE=1 SV=1	0.0	64.9	0.0	0	2	0	0.0	6.3	0.0
154	Q8WXE1	ATR-interacting protein OS=Homo sapiens GN=ATRIP PE=1 SV=1	0.0	76.5	0.0	0	2	0	0.0	3.3	0.0
155	Q9UIF9	Bromodomain adjacent to zinc finger domain protein 2A OS=Homo sapiens GN=BAZ2A PE=1 SV=4	0.0	61.6	0.0	0	2	0	0.0	1.4	0.0
156	Q9BRJ2	39S ribosomal protein L45, mitochondrial OS=Homo sapiens GN=MRPL45 PE=1 SV=2	0.0	67.2	0.0	0	2	0	0.0	5.9	0.0
157	P48380	Transcription factor RFX3 OS=Homo sapiens GN=RFX3 PE=1 SV=2	0.0	81.9	0.0	0	2	0	0.0	3.1	0.0
158	P51617	Interleukin-1 receptor-associated kinase 1 OS=Homo sapiens GN=IRAK1 PE=1 SV=2	0.0	65.0	0.0	0	2	0	0.0	2.9	0.0
159	Q8TD57	Dynein heavy chain 3, axonemal OS=Homo sapiens GN=DNAH3 PE=2 SV=1	0.0	46.2	0.0	0	2	0	0.0	0.6	0.0
160	Q9NVH2	Integrator complex subunit 7 OS=Homo sapiens GN=INTS7 PE=1 SV=1	0.0	101.6	0.0	0	2	0	0.0	3.2	0.0
161	Q9NR28	Diablo homolog, mitochondrial OS=Homo sapiens GN=DIABLO PE=1 SV=1	0.0	146.6	0.0	0	2	0	0.0	9.2	0.0
162	Q92888	Rho guanine nucleotide exchange factor 1 OS=Homo sapiens GN=ARHGEF1 PE=1 SV=2	0.0	85.4	0.0	0	2	0	0.0	2.6	0.0
163	P28288	ATP-binding cassette sub-family D member 3 OS=Homo sapiens GN=ABCD3 PE=1 SV=1	0.0	94.5	0.0	0	2	0	0.0	3.9	0.0
164	Q16666	Gamma-interferon-inducible protein 16 OS=Homo sapiens GN=IFI16 PE=1 SV=3	0.0	79.1	0.0	0	2	0	0.0	3.3	0.0
165	P61224	Ras-related protein Rap-1b OS=Homo sapiens GN=RAP1B PE=1 SV=1	0.0	99.0	0.0	0	2	0	0.0	11.4	0.0
166	Q2TAL8	Glutamine-rich protein 1 OS=Homo sapiens GN=QRICH1 PE=1 SV=1	0.0	49.2	0.0	0	2	0	0.0	3.5	0.0
167	Q9H9F9	Actin-related protein 5 OS=Homo sapiens GN=ACTR5 PE=1 SV=2	0.0	115.3	0.0	0	2	0	0.0	5.3	0.0
168	O15381	Nuclear valosin-containing protein-like OS=Homo sapiens GN=NVL PE=1 SV=1	0.0	77.3	0.0	0	2	0	0.0	2.8	0.0
169	O00566	U3 small nucleolar ribonucleoprotein protein MPP10 OS=Homo sapiens GN=MPHOSPH10 PE=1 SV=2	0.0	61.4	0.0	0	2	0	0.0	4.8	0.0
170	P63165	Small ubiquitin-related modifier 1 OS=Homo sapiens GN=SUMO1 PE=1 SV=1	0.0	46.2	0.0	0	2	0	0.0	18.8	0.0
171	Q15024	Exosome complex component RRP42 OS=Homo sapiens GN=EXOSC7 PE=1 SV=3	0.0	60.7	0.0	0	2	0	0.0	6.2	0.0
172	Q14160	Protein scribble homolog OS=Homo sapiens GN=SCRIB PE=1 SV=4	0.0	75.1	0.0	0	2	0	0.0	1.2	0.0
173	Q9BQL6	Fermitin family homolog 1 OS=Homo sapiens GN=FERMT1 PE=1 SV=1	0.0	110.7	0.0	0	2	0	0.0	3.2	0.0
174	Q9HBM6	Transcription initiation factor TFIID subunit 9B OS=Homo sapiens GN=TAF9B PE=1 SV=1	0.0	91.2	0.0	0	2	0	0.0	7.6	0.0
175	P30153	Serine/threonine-protein phosphatase 2A 65 kDa regulatory subunit A alpha isoform OS=Homo sapiens GN=PPP2R1A PE=1 SV=4	0.0	126.7	0.0	0	2	0	0.0	5.8	0.0
176	Q8N6R0	Methyltransferase-like protein 13 OS=Homo sapiens GN=METTL13 PE=1 SV=1	0.0	61.0	0.0	0	2	0	0.0	3.4	0.0
177	Q9BRJ6	Uncharacterized protein C7orf50 OS=Homo sapiens GN=C7orf50 PE=1 SV=1	0.0	89.8	0.0	0	2	0	0.0	17.0	0.0
178	O43747	AP-1 complex subunit gamma-1 OS=Homo sapiens GN=AP1G1 PE=1 SV=5	0.0	63.3	0.0	0	2	0	0.0	2.3	0.0
179	Q6NZY4	Zinc finger CCHC domain-containing protein 8 OS=Homo sapiens GN=ZCCHC8 PE=1 SV=2	0.0	89.1	0.0	0	2	0	0.0	4.4	0.0
180	O00629	Importin subunit alpha-3 OS=Homo sapiens GN=KPNA4 PE=1 SV=1	0.0	51.8	0.0	0	2	0	0.0	4.8	0.0
181	Q6SPF0	Atherin OS=Homo sapiens GN=SAMD1 PE=1 SV=1	0.0	109.3	0.0	0	2	0	0.0	3.7	0.0
182	Q96Q15	Serine/threonine-protein kinase SMG1 OS=Homo sapiens GN=SMG1 PE=1 SV=3	0.0	151.2	0.0	0	2	0	0.0	0.5	0.0
183	P26368	Splicing factor U2AF 65 kDa subunit OS=Homo sapiens GN=U2AF2 PE=1 SV=4	0.0	48.5	0.0	0	2	0	0.0	5.5	0.0
184	Q7Z739	YTH domain family protein 3 OS=Homo sapiens GN=YTHDF3 PE=1 SV=1	0.0	135.2	0.0	0	2	0	0.0	5.5	0.0
185	Q15382	GTP-binding protein Rheb OS=Homo sapiens GN=RHEB PE=1 SV=1	0.0	59.4	0.0	0	2	0	0.0	9.8	0.0
186	Q03252	Lamin-B2 OS=Homo sapiens GN=LMNB2 PE=1 SV=3	0.0	92.6	0.0	0	2	0	0.0	3.8	0.0
187	O75817	Ribonuclease P protein subunit p20 OS=Homo sapiens GN=POP7 PE=1 SV=2	0.0	58.9	0.0	0	2	0	0.0	15.7	0.0
188	Q9H9Y2	Ribosome production factor 1 OS=Homo sapiens GN=RPF1 PE=1 SV=2	0.0	58.9	0.0	0	2	0	0.0	6.0	0.0
189	Q9NZC9	SWI/SNF-related matrix-associated actin-dependent regulator of chromatin subfamily A-like protein 1 OS=Homo sapiens GN=SMARCAL1 PE=1 SV=1	0.0	98.8	0.0	0	2	0	0.0	2.2	0.0
190	P04844	Dolichyl-diphosphooligosaccharide--protein glycosyltransferase subunit 2 OS=Homo sapiens GN=RPN2 PE=1 SV=3	0.0	69.6	0.0	0	2	0	0.0	3.3	0.0
191	Q8TAF3	WD repeat-containing protein 48 OS=Homo sapiens GN=WDR48 PE=1 SV=1	0.0	53.8	0.0	0	2	0	0.0	3.8	0.0
192	Q9NYL2	Mitogen-activated protein kinase kinase kinase MLT OS=Homo sapiens GN=MLTK PE=1 SV=3	0.0	56.0	0.0	0	2	0	0.0	3.2	0.0
193	Q8TCB0	Interferon-induced protein 44 OS=Homo sapiens GN=IFI44 PE=2 SV=2	0.0	136.9	0.0	0	2	0	0.0	5.2	0.0
194	Q8NEY8	Periphilin-1 OS=Homo sapiens GN=PPHLN1 PE=1 SV=2	0.0	104.5	0.0	0	2	0	0.0	6.3	0.0
195	Q8IY81	pre-rRNA processing protein FTSJ3 OS=Homo sapiens GN=FTSJ3 PE=1 SV=2	0.0	100.4	0.0	0	2	0	0.0	4.8	0.0
196	P55072	Transitional endoplasmic reticulum ATPase OS=Homo sapiens GN=VCP PE=1 SV=4	0.0	86.7	0.0	0	2	0	0.0	3.3	0.0
197	Q9UFW8	CGG triplet repeat-binding protein 1 OS=Homo sapiens GN=CGGBP1 PE=1 SV=2	0.0	50.2	0.0	0	2	0	0.0	14.4	0.0
198	Q9NVU7	Protein SDA1 homolog OS=Homo sapiens GN=SDAD1 PE=1 SV=3	0.0	110.7	0.0	0	2	0	0.0	3.5	0.0
199	Q9BXY0	Protein MAK16 homolog OS=Homo sapiens GN=MAK16 PE=1 SV=2	0.0	85.4	0.0	0	2	0	0.0	7.0	0.0
200	Q9H8H2	Probable ATP-dependent RNA helicase DDX31 OS=Homo sapiens GN=DDX31 PE=1 SV=2	0.0	65.8	0.0	0	2	0	0.0	3.2	0.0
201	Q9H7H0	Methyltransferase-like protein 17, mitochondrial OS=Homo sapiens GN=METTL17 PE=1 SV=1	0.0	57.2	0.0	0	2	0	0.0	4.2	0.0
202	Q86WA8	Lon protease homolog 2, peroxisomal OS=Homo sapiens GN=LONP2 PE=1 SV=1	0.0	106.6	0.0	0	2	0	0.0	2.6	0.0
203	Q9ULW0	Targeting protein for Xklp2 OS=Homo sapiens GN=TPX2 PE=1 SV=2	0.0	81.3	0.0	0	2	0	0.0	2.8	0.0
204	Q14331	Protein FRG1 OS=Homo sapiens GN=FRG1 PE=1 SV=1	0.0	50.0	0.0	0	2	0	0.0	11.2	0.0
205	Q9NZM5	Glioma tumor suppressor candidate region gene 2 protein OS=Homo sapiens GN=GLTSCR2 PE=1 SV=2	0.0	102.4	0.0	0	2	0	0.0	5.9	0.0
206	P61764	Syntaxin-binding protein 1 OS=Homo sapiens GN=STXBP1 PE=1 SV=1	0.0	87.4	0.0	0	2	0	0.0	3.0	0.0
207	Q8N1B4	Vacuolar protein sorting-associated protein 52 homolog OS=Homo sapiens GN=VPS52 PE=1 SV=1	0.0	145.4	0.0	0	2	0	0.0	5.4	0.0
208	Q8IU81	Interferon regulatory factor 2-binding protein 1 OS=Homo sapiens GN=IRF2BP1 PE=1 SV=1	0.0	69.7	0.0	0	2	0	0.0	4.5	0.0
209	O15372	Eukaryotic translation initiation factor 3 subunit H OS=Homo sapiens GN=EIF3H PE=1 SV=1	0.0	80.1	0.0	0	2	0	0.0	6.2	0.0
210	P61313	60S ribosomal protein L15 OS=Homo sapiens GN=RPL15 PE=1 SV=2	0.0	104.1	0.0	0	2	0	0.0	7.8	0.0
211	Q8TF68	Zinc finger protein 384 OS=Homo sapiens GN=ZNF384 PE=1 SV=2	0.0	79.2	0.0	0	2	0	0.0	6.4	0.0
212	P19012	Keratin, type I cytoskeletal 15 OS=Homo sapiens GN=KRT15 PE=1 SV=3	0.0	548.8	0.0	0	2	0	0.0	5.9	0.0
213	O75564	Jerky protein homolog OS=Homo sapiens GN=JRK PE=1 SV=2	0.0	93.1	0.0	0	2	0	0.0	3.7	0.0
214	Q96JM3	Chromosome alignment-maintaining phosphoprotein 1 OS=Homo sapiens GN=CHAMP1 PE=1 SV=2	0.0	75.7	0.0	0	2	0	0.0	3.1	0.0
215	O60313	Dynamin-like 120 kDa protein, mitochondrial OS=Homo sapiens GN=OPA1 PE=1 SV=3	0.0	66.0	0.0	0	2	0	0.0	2.9	0.0
216	P45880	Voltage-dependent anion-selective channel protein 2 OS=Homo sapiens GN=VDAC2 PE=1 SV=2	0.0	74.8	0.0	0	2	0	0.0	7.1	0.0
217	Q9HCG8	Pre-mRNA-splicing factor CWC22 homolog OS=Homo sapiens GN=CWC22 PE=1 SV=3	0.0	113.1	0.0	0	2	0	0.0	2.6	0.0
218	P49848	Transcription initiation factor TFIID subunit 6 OS=Homo sapiens GN=TAF6 PE=1 SV=1	0.0	101.3	0.0	0	2	0	0.0	3.7	0.0
219	Q9BW27	Nuclear pore complex protein Nup85 OS=Homo sapiens GN=NUP85 PE=1 SV=1	0.0	114.5	0.0	0	2	0	0.0	4.3	0.0
220	Q13322	Growth factor receptor-bound protein 10 OS=Homo sapiens GN=GRB10 PE=1 SV=2	0.0	51.1	0.0	0	2	0	0.0	4.2	0.0
221	Q13724	Mannosyl-oligosaccharide glucosidase OS=Homo sapiens GN=MOGS PE=1 SV=5	0.0	94.6	0.0	0	2	0	0.0	2.9	0.0
222	Q9NUL3	Double-stranded RNA-binding protein Staufen homolog 2 OS=Homo sapiens GN=STAU2 PE=1 SV=1	0.0	78.4	0.0	0	2	0	0.0	4.0	0.0
223	Q7KZI7	Serine/threonine-protein kinase MARK2 OS=Homo sapiens GN=MARK2 PE=1 SV=2	0.0	137.1	0.0	0	2	0	0.0	3.9	0.0
224	Q6XZF7	Dynamin-binding protein OS=Homo sapiens GN=DNMBP PE=1 SV=1	0.0	48.8	0.0	0	2	0	0.0	1.3	0.0
225	Q3B726	DNA-directed RNA polymerase I subunit RPA43 OS=Homo sapiens GN=TWISTNB PE=1 SV=1	0.0	63.2	0.0	0	2	0	0.0	7.4	0.0
226	Q9H2U1	Probable ATP-dependent RNA helicase DHX36 OS=Homo sapiens GN=DHX36 PE=1 SV=2	0.0	57.9	0.0	0	2	0	0.0	2.4	0.0
227	P00338	L-lactate dehydrogenase A chain OS=Homo sapiens GN=LDHA PE=1 SV=2	0.0	60.1	0.0	0	2	0	0.0	7.5	0.0
228	Q2TAK8	PWWP domain-containing protein MUM1 OS=Homo sapiens GN=MUM1 PE=1 SV=3	0.0	47.5	0.0	0	2	0	0.0	2.8	0.0
229	Q96N67	Dedicator of cytokinesis protein 7 OS=Homo sapiens GN=DOCK7 PE=1 SV=4	0.0	80.7	0.0	0	2	0	0.0	1.0	0.0
230	P25490	Transcriptional repressor protein YY1 OS=Homo sapiens GN=YY1 PE=1 SV=2	0.0	87.8	0.0	0	2	0	0.0	7.0	0.0
231	P17987	T-complex protein 1 subunit alpha OS=Homo sapiens GN=TCP1 PE=1 SV=1	0.0	83.4	0.0	0	2	0	0.0	6.3	0.0
232	P40429	60S ribosomal protein L13a OS=Homo sapiens GN=RPL13A PE=1 SV=2	0.0	93.3	0.0	0	2	0	0.0	8.4	0.0
233	Q9Y3B9	RRP15-like protein OS=Homo sapiens GN=RRP15 PE=1 SV=2	0.0	79.2	0.0	0	2	0	0.0	7.1	0.0
234	Q6UN15	Pre-mRNA 3'-end-processing factor FIP1 OS=Homo sapiens GN=FIP1L1 PE=1 SV=1	0.0	72.1	0.0	0	2	0	0.0	5.4	0.0
235	P10515	Dihydrolipoyllysine-residue acetyltransferase component of pyruvate dehydrogenase complex, mitochondrial OS=Homo sapiens GN=DLAT PE=1 SV=3	0.0	107.4	0.0	0	2	0	0.0	3.6	0.0
236	P47914	60S ribosomal protein L29 OS=Homo sapiens GN=RPL29 PE=1 SV=2	0.0	106.0	0.0	0	2	0	0.0	14.5	0.0
237	Q13247	Serine/arginine-rich splicing factor 6 OS=Homo sapiens GN=SRSF6 PE=1 SV=2	0.0	132.6	0.0	0	2	0	0.0	6.4	0.0
238	P24468	COUP transcription factor 2 OS=Homo sapiens GN=NR2F2 PE=1 SV=1	0.0	119.9	0.0	0	2	0	0.0	5.8	0.0
239	Q96E14	RecQ-mediated genome instability protein 2 OS=Homo sapiens GN=RMI2 PE=1 SV=2	0.0	73.6	0.0	0	2	0	0.0	11.6	0.0
240	Q13428	Treacle protein OS=Homo sapiens GN=TCOF1 PE=1 SV=3	0.0	71.9	0.0	0	2	0	0.0	1.6	0.0
241	Q14680	Maternal embryonic leucine zipper kinase OS=Homo sapiens GN=MELK PE=1 SV=3	0.0	94.9	0.0	0	2	0	0.0	2.8	0.0
242	Q96T88	E3 ubiquitin-protein ligase UHRF1 OS=Homo sapiens GN=UHRF1 PE=1 SV=1	0.0	52.5	0.0	0	1	0	0.0	1.5	0.0
243	Q13751	Laminin subunit beta-3 OS=Homo sapiens GN=LAMB3 PE=1 SV=1	0.0	75.3	0.0	0	1	0	0.0	2.0	0.0
244	Q8WY22	BRI3-binding protein OS=Homo sapiens GN=BRI3BP PE=1 SV=1	0.0	96.2	0.0	0	1	0	0.0	6.8	0.0
245	P42356	Phosphatidylinositol 4-kinase alpha OS=Homo sapiens GN=PI4KA PE=1 SV=3	0.0	53.3	0.0	0	1	0	0.0	0.5	0.0
246	Q9Y5A9	YTH domain family protein 2 OS=Homo sapiens GN=YTHDF2 PE=1 SV=2	0.0	66.7	0.0	0	1	0	0.0	2.1	0.0
247	P62273	40S ribosomal protein S29 OS=Homo sapiens GN=RPS29 PE=1 SV=2	0.0	58.2	0.0	0	1	0	0.0	19.6	0.0
248	Q969Q0	60S ribosomal protein L36a-like OS=Homo sapiens GN=RPL36AL PE=1 SV=3	0.0	61.6	0.0	0	1	0	0.0	12.3	0.0
249	P41214	Eukaryotic translation initiation factor 2D OS=Homo sapiens GN=EIF2D PE=1 SV=3	0.0	48.7	0.0	0	1	0	0.0	2.1	0.0
250	O95059	Ribonuclease P protein subunit p14 OS=Homo sapiens GN=RPP14 PE=1 SV=3	0.0	52.6	0.0	0	1	0	0.0	16.1	0.0
251	P84098	60S ribosomal protein L19 OS=Homo sapiens GN=RPL19 PE=1 SV=1	0.0	70.6	0.0	0	1	0	0.0	4.6	0.0
252	Q96AE4	Far upstream element-binding protein 1 OS=Homo sapiens GN=FUBP1 PE=1 SV=3	0.0	63.4	0.0	0	1	0	0.0	2.0	0.0
253	Q6NUQ4	Transmembrane protein 214 OS=Homo sapiens GN=TMEM214 PE=1 SV=2	0.0	95.4	0.0	0	1	0	0.0	1.2	0.0
254	Q92552	28S ribosomal protein S27, mitochondrial OS=Homo sapiens GN=MRPS27 PE=1 SV=3	0.0	63.8	0.0	0	1	0	0.0	5.8	0.0
255	Q96QR8	Transcriptional activator protein Pur-beta OS=Homo sapiens GN=PURB PE=1 SV=3	0.0	106.4	0.0	0	1	0	0.0	4.2	0.0
256	P25205	DNA replication licensing factor MCM3 OS=Homo sapiens GN=MCM3 PE=1 SV=3	0.0	63.6	0.0	0	1	0	0.0	1.1	0.0
257	O60884	DnaJ homolog subfamily A member 2 OS=Homo sapiens GN=DNAJA2 PE=1 SV=1	0.0	47.2	0.0	0	1	0	0.0	3.4	0.0
258	Q9H9A5	CCR4-NOT transcription complex subunit 10 OS=Homo sapiens GN=CNOT10 PE=1 SV=1	0.0	64.1	0.0	0	1	0	0.0	1.6	0.0
259	O60783	28S ribosomal protein S14, mitochondrial OS=Homo sapiens GN=MRPS14 PE=1 SV=1	0.0	84.4	0.0	0	1	0	0.0	11.7	0.0
260	P08865	40S ribosomal protein SA OS=Homo sapiens GN=RPSA PE=1 SV=4	0.0	80.0	0.0	0	1	0	0.0	4.4	0.0
261	Q01844	RNA-binding protein EWS OS=Homo sapiens GN=EWSR1 PE=1 SV=1	0.0	57.2	0.0	0	1	0	0.0	2.1	0.0
262	Q9UJZ1	Stomatin-like protein 2, mitochondrial OS=Homo sapiens GN=STOML2 PE=1 SV=1	0.0	56.7	0.0	0	1	0	0.0	4.2	0.0
263	Q9NS69	Mitochondrial import receptor subunit TOM22 homolog OS=Homo sapiens GN=TOMM22 PE=1 SV=3	0.0	60.7	0.0	0	1	0	0.0	8.5	0.0
264	P16989	Y-box-binding protein 3 OS=Homo sapiens GN=YBX3 PE=1 SV=4	0.0	282.7	0.0	0	1	0	0.0	5.1	0.0
265	Q9UHB6	LIM domain and actin-binding protein 1 OS=Homo sapiens GN=LIMA1 PE=1 SV=1	0.0	53.7	0.0	0	1	0	0.0	1.4	0.0
266	Q12873	Chromodomain-helicase-DNA-binding protein 3 OS=Homo sapiens GN=CHD3 PE=1 SV=3	0.0	518.0	0.0	0	1	0	0.0	0.2	0.0
267	Q9NVE4	Coiled-coil domain-containing protein 87 OS=Homo sapiens GN=CCDC87 PE=2 SV=2	0.0	50.1	0.0	0	1	0	0.0	0.8	0.0
268	P08047	Transcription factor Sp1 OS=Homo sapiens GN=SP1 PE=1 SV=3	0.0	56.3	0.0	0	1	0	0.0	3.6	0.0
269	Q6ZSZ5	Rho guanine nucleotide exchange factor 18 OS=Homo sapiens GN=ARHGEF18 PE=1 SV=3	0.0	54.6	0.0	0	1	0	0.0	0.9	0.0
270	P04075	Fructose-bisphosphate aldolase A OS=Homo sapiens GN=ALDOA PE=1 SV=2	0.0	48.3	0.0	0	1	0	0.0	3.8	0.0
271	Q9H1B7	Interferon regulatory factor 2-binding protein-like OS=Homo sapiens GN=IRF2BPL PE=1 SV=1	0.0	83.3	0.0	0	1	0	0.0	1.6	0.0
272	Q99590	Protein SCAF11 OS=Homo sapiens GN=SCAF11 PE=1 SV=2	0.0	51.2	0.0	0	1	0	0.0	0.5	0.0
273	O95478	Ribosome biogenesis protein NSA2 homolog OS=Homo sapiens GN=NSA2 PE=1 SV=1	0.0	58.4	0.0	0	1	0	0.0	5.0	0.0
274	Q93074	Mediator of RNA polymerase II transcription subunit 12 OS=Homo sapiens GN=MED12 PE=1 SV=4	0.0	93.0	0.0	0	1	0	0.0	0.8	0.0
275	Q99728	BRCA1-associated RING domain protein 1 OS=Homo sapiens GN=BARD1 PE=1 SV=2	0.0	65.8	0.0	0	1	0	0.0	1.5	0.0
276	O14686	Histone-lysine N-methyltransferase 2D OS=Homo sapiens GN=KMT2D PE=1 SV=2	0.0	79.9	0.0	0	1	0	0.0	0.1	0.0
277	O43447	Peptidyl-prolyl cis-trans isomerase H OS=Homo sapiens GN=PPIH PE=1 SV=1	0.0	45.5	0.0	0	1	0	0.0	7.9	0.0
278	Q9H2Y7	Zinc finger protein 106 OS=Homo sapiens GN=ZNF106 PE=1 SV=1	0.0	59.3	0.0	0	1	0	0.0	0.9	0.0
279	P33992	DNA replication licensing factor MCM5 OS=Homo sapiens GN=MCM5 PE=1 SV=5	0.0	48.1	0.0	0	1	0	0.0	2.0	0.0
280	O00165	HCLS1-associated protein X-1 OS=Homo sapiens GN=HAX1 PE=1 SV=2	0.0	45.5	0.0	0	1	0	0.0	3.9	0.0
281	P11055	Myosin-3 OS=Homo sapiens GN=MYH3 PE=1 SV=3	0.0	65.2	0.0	0	1	0	0.0	0.6	0.0
282	P40616	ADP-ribosylation factor-like protein 1 OS=Homo sapiens GN=ARL1 PE=1 SV=1	0.0	52.0	0.0	0	1	0	0.0	6.1	0.0
283	P31483	Nucleolysin TIA-1 isoform p40 OS=Homo sapiens GN=TIA1 PE=1 SV=3	0.0	174.2	0.0	0	1	0	0.0	2.1	0.0
284	Q9Y3D3	28S ribosomal protein S16, mitochondrial OS=Homo sapiens GN=MRPS16 PE=1 SV=1	0.0	51.6	0.0	0	1	0	0.0	5.8	0.0
285	Q15361	Transcription termination factor 1 OS=Homo sapiens GN=TTF1 PE=1 SV=3	0.0	48.7	0.0	0	1	0	0.0	1.8	0.0
286	Q7Z2Z1	Treslin OS=Homo sapiens GN=TICRR PE=1 SV=2	0.0	60.8	0.0	0	1	0	0.0	0.5	0.0
287	Q08170	Serine/arginine-rich splicing factor 4 OS=Homo sapiens GN=SRSF4 PE=1 SV=2	0.0	73.4	0.0	0	1	0	0.0	2.4	0.0
288	Q9NSP4	Centromere protein M OS=Homo sapiens GN=CENPM PE=1 SV=1	0.0	51.9	0.0	0	1	0	0.0	6.1	0.0
289	P16104	Histone H2AX OS=Homo sapiens GN=H2AFX PE=1 SV=2	0.0	286.7	0.0	0	1	0	0.0	16.1	0.0
290	Q9BYV8	Centrosomal protein of 41 kDa OS=Homo sapiens GN=CEP41 PE=1 SV=1	0.0	57.6	0.0	0	1	0	0.0	4.6	0.0
291	Q5PR19	Putative UPF0607 protein LOC392364 OS=Homo sapiens PE=2 SV=3	0.0	71.4	0.0	0	1	0	0.0	5.8	0.0
292	Q96EY7	Pentatricopeptide repeat domain-containing protein 3, mitochondrial OS=Homo sapiens GN=PTCD3 PE=1 SV=3	0.0	62.6	0.0	0	1	0	0.0	1.9	0.0
293	Q9H0X9	Oxysterol-binding protein-related protein 5 OS=Homo sapiens GN=OSBPL5 PE=1 SV=1	0.0	50.4	0.0	0	1	0	0.0	1.3	0.0
294	Q15126	Phosphomevalonate kinase OS=Homo sapiens GN=PMVK PE=1 SV=3	0.0	48.7	0.0	0	1	0	0.0	5.7	0.0
295	Q9BRL6	Serine/arginine-rich splicing factor 8 OS=Homo sapiens GN=SRSF8 PE=1 SV=1	0.0	57.8	0.0	0	1	0	0.0	2.8	0.0
296	Q71UM5	40S ribosomal protein S27-like OS=Homo sapiens GN=RPS27L PE=1 SV=3	0.0	145.6	0.0	0	1	0	0.0	13.1	0.0
297	O95365	Zinc finger and BTB domain-containing protein 7A OS=Homo sapiens GN=ZBTB7A PE=1 SV=1	0.0	66.5	0.0	0	1	0	0.0	3.9	0.0
298	Q06787	Fragile X mental retardation protein 1 OS=Homo sapiens GN=FMR1 PE=1 SV=1	0.0	109.9	0.0	0	1	0	0.0	2.2	0.0
299	Q9H967	WD repeat-containing protein 76 OS=Homo sapiens GN=WDR76 PE=1 SV=2	0.0	51.5	0.0	0	1	0	0.0	1.4	0.0
300	Q7Z406	Myosin-14 OS=Homo sapiens GN=MYH14 PE=1 SV=2	0.0	250.1	0.0	0	1	0	0.0	0.4	0.0
301	P43897	Elongation factor Ts, mitochondrial OS=Homo sapiens GN=TSFM PE=1 SV=2	0.0	90.6	0.0	0	1	0	0.0	5.2	0.0
302	Q9H7E9	UPF0488 protein C8orf33 OS=Homo sapiens GN=C8orf33 PE=1 SV=1	0.0	47.1	0.0	0	1	0	0.0	4.8	0.0
303	P60953	Cell division control protein 42 homolog OS=Homo sapiens GN=CDC42 PE=1 SV=2	0.0	89.5	0.0	0	1	0	0.0	8.9	0.0
304	Q96N11	Uncharacterized protein C7orf26 OS=Homo sapiens GN=C7orf26 PE=2 SV=1	0.0	47.8	0.0	0	1	0	0.0	3.1	0.0
305	Q9P275	Ubiquitin carboxyl-terminal hydrolase 36 OS=Homo sapiens GN=USP36 PE=1 SV=3	0.0	62.0	0.0	0	1	0	0.0	1.1	0.0
306	P52739	Zinc finger protein 131 OS=Homo sapiens GN=ZNF131 PE=1 SV=2	0.0	53.8	0.0	0	1	0	0.0	2.9	0.0
307	Q8WY36	HMG box transcription factor BBX OS=Homo sapiens GN=BBX PE=1 SV=1	0.0	65.3	0.0	0	1	0	0.0	1.0	0.0
308	Q9Y333	U6 snRNA-associated Sm-like protein LSm2 OS=Homo sapiens GN=LSM2 PE=1 SV=1	0.0	54.3	0.0	0	1	0	0.0	11.6	0.0
309	Q9NRX2	39S ribosomal protein L17, mitochondrial OS=Homo sapiens GN=MRPL17 PE=1 SV=1	0.0	49.6	0.0	0	1	0	0.0	4.6	0.0
310	Q9NPF5	DNA methyltransferase 1-associated protein 1 OS=Homo sapiens GN=DMAP1 PE=1 SV=1	0.0	85.7	0.0	0	1	0	0.0	2.6	0.0
311	P55039	Developmentally-regulated GTP-binding protein 2 OS=Homo sapiens GN=DRG2 PE=1 SV=1	0.0	52.8	0.0	0	1	0	0.0	3.0	0.0
312	A1L4K1	Fibronectin type III and SPRY domain-containing protein 2 OS=Homo sapiens GN=FSD2 PE=2 SV=1	0.0	46.0	0.0	0	1	0	0.0	1.5	0.0
313	Q96E39	RNA binding motif protein, X-linked-like-1 OS=Homo sapiens GN=RBMXL1 PE=1 SV=1	0.0	400.4	0.0	0	1	0	0.0	2.8	0.0
314	P42696	RNA-binding protein 34 OS=Homo sapiens GN=RBM34 PE=1 SV=2	0.0	60.4	0.0	0	1	0	0.0	3.0	0.0
315	Q86Y46	Keratin, type II cytoskeletal 73 OS=Homo sapiens GN=KRT73 PE=1 SV=1	0.0	265.9	0.0	0	1	0	0.0	1.7	0.0
316	Q8NI77	Kinesin-like protein KIF18A OS=Homo sapiens GN=KIF18A PE=1 SV=2	0.0	56.7	0.0	0	1	0	0.0	1.3	0.0
317	P14625	Endoplasmin OS=Homo sapiens GN=HSP90B1 PE=1 SV=1	0.0	154.4	0.0	0	1	0	0.0	1.1	0.0
318	O60942	mRNA-capping enzyme OS=Homo sapiens GN=RNGTT PE=1 SV=1	0.0	54.8	0.0	0	1	0	0.0	1.3	0.0
319	P78362	SRSF protein kinase 2 OS=Homo sapiens GN=SRPK2 PE=1 SV=3	0.0	111.2	0.0	0	1	0	0.0	1.7	0.0
320	P48444	Coatomer subunit delta OS=Homo sapiens GN=ARCN1 PE=1 SV=1	0.0	49.8	0.0	0	1	0	0.0	2.2	0.0
321	Q8WYA6	Beta-catenin-like protein 1 OS=Homo sapiens GN=CTNNBL1 PE=1 SV=1	0.0	53.9	0.0	0	1	0	0.0	1.4	0.0
322	Q6P161	39S ribosomal protein L54, mitochondrial OS=Homo sapiens GN=MRPL54 PE=1 SV=1	0.0	50.7	0.0	0	1	0	0.0	7.2	0.0
323	P21359	Neurofibromin OS=Homo sapiens GN=NF1 PE=1 SV=2	0.0	48.9	0.0	0	1	0	0.0	0.6	0.0
324	P51608	Methyl-CpG-binding protein 2 OS=Homo sapiens GN=MECP2 PE=1 SV=1	0.0	46.6	0.0	0	1	0	0.0	2.9	0.0
325	O94927	HAUS augmin-like complex subunit 5 OS=Homo sapiens GN=HAUS5 PE=1 SV=2	0.0	85.4	0.0	0	1	0	0.0	1.7	0.0
326	P16615	Sarcoplasmic/endoplasmic reticulum calcium ATPase 2 OS=Homo sapiens GN=ATP2A2 PE=1 SV=1	0.0	45.9	0.0	0	1	0	0.0	1.2	0.0
327	Q12962	Transcription initiation factor TFIID subunit 10 OS=Homo sapiens GN=TAF10 PE=1 SV=1	0.0	52.7	0.0	0	1	0	0.0	11.5	0.0
328	P12236	ADP/ATP translocase 3 OS=Homo sapiens GN=SLC25A6 PE=1 SV=4	0.0	289.6	0.0	0	1	0	0.0	4.4	0.0
329	Q14004	Cyclin-dependent kinase 13 OS=Homo sapiens GN=CDK13 PE=1 SV=2	0.0	101.1	0.0	0	1	0	0.0	0.5	0.0
330	O75635	Serpin B7 OS=Homo sapiens GN=SERPINB7 PE=1 SV=1	0.0	45.4	0.0	0	1	0	0.0	2.9	0.0
331	P08651	Nuclear factor 1 C-type OS=Homo sapiens GN=NFIC PE=1 SV=2	0.0	54.8	0.0	0	1	0	0.0	2.2	0.0
332	Q9NY65	Tubulin alpha-8 chain OS=Homo sapiens GN=TUBA8 PE=1 SV=1	0.0	304.1	0.0	0	1	0	0.0	1.6	0.0
333	Q92945	Far upstream element-binding protein 2 OS=Homo sapiens GN=KHSRP PE=1 SV=4	0.0	65.1	0.0	0	1	0	0.0	1.4	0.0
334	Q96BN2	Transcriptional adapter 1 OS=Homo sapiens GN=TADA1 PE=1 SV=1	0.0	56.8	0.0	0	1	0	0.0	4.2	0.0
335	O43264	Centromere/kinetochore protein zw10 homolog OS=Homo sapiens GN=ZW10 PE=1 SV=3	0.0	61.2	0.0	0	1	0	0.0	1.8	0.0
336	Q9Y3A4	Ribosomal RNA-processing protein 7 homolog A OS=Homo sapiens GN=RRP7A PE=1 SV=2	0.0	71.1	0.0	0	1	0	0.0	4.6	0.0
337	Q93034	Cullin-5 OS=Homo sapiens GN=CUL5 PE=1 SV=4	0.0	68.0	0.0	0	1	0	0.0	1.4	0.0
338	Q96T76	MMS19 nucleotide excision repair protein homolog OS=Homo sapiens GN=MMS19 PE=1 SV=2	0.0	49.1	0.0	0	1	0	0.0	1.1	0.0
339	Q6AI08	HEAT repeat-containing protein 6 OS=Homo sapiens GN=HEATR6 PE=1 SV=1	0.0	47.6	0.0	0	1	0	0.0	1.0	0.0
340	Q9NVN8	Guanine nucleotide-binding protein-like 3-like protein OS=Homo sapiens GN=GNL3L PE=1 SV=1	0.0	106.0	0.0	0	1	0	0.0	2.6	0.0
341	Q9BRG1	Vacuolar protein-sorting-associated protein 25 OS=Homo sapiens GN=VPS25 PE=1 SV=1	0.0	49.2	0.0	0	1	0	0.0	4.5	0.0
342	Q86XX4	Extracellular matrix protein FRAS1 OS=Homo sapiens GN=FRAS1 PE=1 SV=2	0.0	97.8	0.0	0	1	0	0.0	0.3	0.0
343	O60508	Pre-mRNA-processing factor 17 OS=Homo sapiens GN=CDC40 PE=1 SV=1	0.0	51.4	0.0	0	1	0	0.0	1.7	0.0
344	Q9UQ16	Dynamin-3 OS=Homo sapiens GN=DNM3 PE=1 SV=4	0.0	653.1	0.0	0	1	0	0.0	1.7	0.0
345	O43166	Signal-induced proliferation-associated 1-like protein 1 OS=Homo sapiens GN=SIPA1L1 PE=1 SV=4	0.0	56.8	0.0	0	1	0	0.0	0.7	0.0
346	Q9NPQ8	Synembryn-A OS=Homo sapiens GN=RIC8A PE=1 SV=3	0.0	46.6	0.0	0	1	0	0.0	1.5	0.0
347	Q9UBB4	Ataxin-10 OS=Homo sapiens GN=ATXN10 PE=1 SV=1	0.0	61.7	0.0	0	1	0	0.0	3.2	0.0
348	P46782	40S ribosomal protein S5 OS=Homo sapiens GN=RPS5 PE=1 SV=4	0.0	60.2	0.0	0	1	0	0.0	4.4	0.0
1	P68871	Hemoglobin subunit beta OS=Homo sapiens GN=HBB PE=1 SV=2	57.0	432.5	0.0	1	8	0	8.8	55.1	0.0
2	Q9UQ13	Leucine-rich repeat protein SHOC-2 OS=Homo sapiens GN=SHOC2 PE=1 SV=2	54.9	431.5	0.0	2	8	0	3.1	18.4	0.0
3	P49116	Nuclear receptor subfamily 2 group C member 2 OS=Homo sapiens GN=NR2C2 PE=1 SV=1	70.2	384.6	0.0	2	7	0	4.4	17.3	0.0
4	P01857	Ig gamma-1 chain C region OS=Homo sapiens GN=IGHG1 PE=1 SV=1	101.6	319.5	0.0	1	7	0	3.6	30.3	0.0
5	Q9BV38	WD repeat-containing protein 18 OS=Homo sapiens GN=WDR18 PE=1 SV=2	58.0	356.1	0.0	1	7	0	2.1	19.0	0.0
6	Q5QJE6	Deoxynucleotidyltransferase terminal-interacting protein 2 OS=Homo sapiens GN=DNTTIP2 PE=1 SV=2	73.9	311.8	0.0	2	6	0	2.6	10.4	0.0
8	P69905	Hemoglobin subunit alpha OS=Homo sapiens GN=HBA1 PE=1 SV=2	52.5	187.9	0.0	1	5	0	10.6	28.2	0.0
1	Q9Y4A5	Transformation/transcription domain-associated protein OS=Homo sapiens GN=TRRAP PE=1 SV=3	0.0	1781.4	564.3	0	45	15	0.0	12.9	4.5
2	O75643	U5 small nuclear ribonucleoprotein 200 kDa helicase OS=Homo sapiens GN=SNRNP200 PE=1 SV=2	0.0	1448.4	1199.2	0	36	27	0.0	20.7	14.5
3	Q12789	General transcription factor 3C polypeptide 1 OS=Homo sapiens GN=GTF3C1 PE=1 SV=4	0.0	1436.4	523.8	0	34	15	0.0	19.1	8.1
4	P46821	Microtubule-associated protein 1B OS=Homo sapiens GN=MAP1B PE=1 SV=2	0.0	1463.9	159.4	0	34	5	0.0	20.1	3.0
5	Q03001	Dystonin OS=Homo sapiens GN=DST PE=1 SV=4	0.0	1392.7	635.3	0	31	13	0.0	5.1	2.2
6	Q6P2Q9	Pre-mRNA-processing-splicing factor 8 OS=Homo sapiens GN=PRPF8 PE=1 SV=2	0.0	1206.0	449.0	0	31	14	0.0	15.0	6.3
9	Q9Y2X3	Nucleolar protein 58 OS=Homo sapiens GN=NOP58 PE=1 SV=1	0.0	1016.8	302.6	0	24	8	0.0	45.2	18.3
10	Q96L91	E1A-binding protein p400 OS=Homo sapiens GN=EP400 PE=1 SV=4	0.0	1133.4	305.8	0	24	6	0.0	12.0	2.5
15	O76021	Ribosomal L1 domain-containing protein 1 OS=Homo sapiens GN=RSL1D1 PE=1 SV=3	0.0	1079.1	162.5	0	21	5	0.0	32.2	12.0
16	Q9GZR7	ATP-dependent RNA helicase DDX24 OS=Homo sapiens GN=DDX24 PE=1 SV=1	0.0	847.5	137.1	0	20	3	0.0	33.2	4.2
22	Q9BVP2	Guanine nucleotide-binding protein-like 3 OS=Homo sapiens GN=GNL3 PE=1 SV=2	0.0	701.0	105.4	0	17	2	0.0	33.7	4.7
26	Q9P2D1	Chromodomain-helicase-DNA-binding protein 7 OS=Homo sapiens GN=CHD7 PE=1 SV=3	0.0	764.5	118.9	0	16	2	0.0	6.9	0.8
28	Q96BY6	Dedicator of cytokinesis protein 10 OS=Homo sapiens GN=DOCK10 PE=1 SV=3	0.0	725.3	271.7	0	15	5	0.0	8.3	3.1
32	Q9UNX4	WD repeat-containing protein 3 OS=Homo sapiens GN=WDR3 PE=1 SV=1	0.0	738.7	142.5	0	15	5	0.0	23.5	5.5
35	Q96GQ7	Probable ATP-dependent RNA helicase DDX27 OS=Homo sapiens GN=DDX27 PE=1 SV=2	0.0	736.2	100.0	0	14	3	0.0	18.8	3.6
36	Q9NYH9	U3 small nucleolar RNA-associated protein 6 homolog OS=Homo sapiens GN=UTP6 PE=1 SV=2	0.0	431.9	70.7	0	14	2	0.0	24.8	2.7
37	Q13823	Nucleolar GTP-binding protein 2 OS=Homo sapiens GN=GNL2 PE=1 SV=1	0.0	627.9	119.8	0	14	3	0.0	19.3	4.9
50	Q9H0H5	Rac GTPase-activating protein 1 OS=Homo sapiens GN=RACGAP1 PE=1 SV=1	0.0	579.9	111.0	0	12	2	0.0	25.3	3.8
60	Q9UNX3	60S ribosomal protein L26-like 1 OS=Homo sapiens GN=RPL26L1 PE=1 SV=1	0.0	537.2	323.3	0	11	1	0.0	50.3	6.2
67	Q9H307	Pinin OS=Homo sapiens GN=PNN PE=1 SV=4	0.0	465.0	76.6	0	10	1	0.0	17.2	1.3
69	Q8WUM4	Programmed cell death 6-interacting protein OS=Homo sapiens GN=PDCD6IP PE=1 SV=1	0.0	378.1	133.8	0	10	1	0.0	15.6	1.5
70	Q8NI36	WD repeat-containing protein 36 OS=Homo sapiens GN=WDR36 PE=1 SV=1	0.0	540.8	99.6	0	10	2	0.0	13.9	2.7
75	Q9H0D6	5'-3' exoribonuclease 2 OS=Homo sapiens GN=XRN2 PE=1 SV=1	0.0	369.0	117.1	0	10	3	0.0	12.4	3.9
78	Q9UKD2	mRNA turnover protein 4 homolog OS=Homo sapiens GN=MRTO4 PE=1 SV=2	0.0	410.4	114.8	0	10	2	0.0	34.3	10.9
79	Q9H6W3	Bifunctional lysine-specific demethylase and histidyl-hydroxylase NO66 OS=Homo sapiens GN=NO66 PE=1 SV=2	0.0	375.7	58.7	0	10	2	0.0	17.6	3.1
81	Q3KQU3	MAP7 domain-containing protein 1 OS=Homo sapiens GN=MAP7D1 PE=1 SV=1	0.0	394.2	108.7	0	10	2	0.0	13.3	2.9
82	Q12788	Transducin beta-like protein 3 OS=Homo sapiens GN=TBL3 PE=1 SV=2	0.0	461.0	58.9	0	10	2	0.0	17.7	3.2
83	Q13573	SNW domain-containing protein 1 OS=Homo sapiens GN=SNW1 PE=1 SV=1	0.0	439.9	79.8	0	9	1	0.0	20.7	2.8
91	O00541	Pescadillo homolog OS=Homo sapiens GN=PES1 PE=1 SV=1	0.0	441.4	60.4	0	9	1	0.0	15.5	1.4
95	Q9HCE1	Putative helicase MOV-10 OS=Homo sapiens GN=MOV10 PE=1 SV=2	0.0	451.9	56.4	0	9	1	0.0	11.7	1.0
96	Q5T5X7	BEN domain-containing protein 3 OS=Homo sapiens GN=BEND3 PE=1 SV=1	0.0	319.7	65.4	0	9	2	0.0	12.3	2.8
98	Q9BQ39	ATP-dependent RNA helicase DDX50 OS=Homo sapiens GN=DDX50 PE=1 SV=1	0.0	525.4	176.1	0	9	1	0.0	15.3	3.0
102	Q8TDN6	Ribosome biogenesis protein BRX1 homolog OS=Homo sapiens GN=BRIX1 PE=1 SV=2	0.0	430.7	131.9	0	9	2	0.0	27.8	7.1
111	P51610	Host cell factor 1 OS=Homo sapiens GN=HCFC1 PE=1 SV=2	0.0	286.5	102.9	0	8	2	0.0	6.2	1.3
118	O15226	NF-kappa-B-repressing factor OS=Homo sapiens GN=NKRF PE=1 SV=2	0.0	281.1	47.0	0	8	1	0.0	13.2	1.3
126	Q68D10	Protein SPT2 homolog OS=Homo sapiens GN=SPTY2D1 PE=1 SV=3	0.0	298.6	57.0	0	7	2	0.0	10.9	2.9
128	P55084	Trifunctional enzyme subunit beta, mitochondrial OS=Homo sapiens GN=HADHB PE=1 SV=3	0.0	228.3	88.5	0	7	1	0.0	14.3	1.9
130	Q5JTZ9	Alanine--tRNA ligase, mitochondrial OS=Homo sapiens GN=AARS2 PE=1 SV=1	0.0	227.8	47.3	0	7	1	0.0	9.4	1.4
131	Q13283	Ras GTPase-activating protein-binding protein 1 OS=Homo sapiens GN=G3BP1 PE=1 SV=1	0.0	241.7	121.3	0	7	2	0.0	17.8	7.5
133	Q9NX58	Cell growth-regulating nucleolar protein OS=Homo sapiens GN=LYAR PE=1 SV=2	0.0	404.6	109.1	0	7	2	0.0	26.6	9.0
135	Q9UBB9	Tuftelin-interacting protein 11 OS=Homo sapiens GN=TFIP11 PE=1 SV=1	0.0	289.8	77.8	0	7	2	0.0	11.2	2.2
138	Q96SB4	SRSF protein kinase 1 OS=Homo sapiens GN=SRPK1 PE=1 SV=2	0.0	253.6	52.4	0	7	2	0.0	11.0	2.9
141	Q9BYJ9	YTH domain family protein 1 OS=Homo sapiens GN=YTHDF1 PE=1 SV=1	0.0	212.9	118.2	0	7	2	0.0	16.3	5.5
143	Q9BYG3	MKI67 FHA domain-interacting nucleolar phosphoprotein OS=Homo sapiens GN=MKI67IP PE=1 SV=1	0.0	271.8	91.0	0	7	2	0.0	25.9	8.9
148	Q96Q89	Kinesin-like protein KIF20B OS=Homo sapiens GN=KIF20B PE=1 SV=3	0.0	317.3	52.0	0	7	1	0.0	4.8	0.6
153	Q8WUK0	Phosphatidylglycerophosphatase and protein-tyrosine phosphatase 1 OS=Homo sapiens GN=PTPMT1 PE=1 SV=1	0.0	197.1	81.5	0	6	1	0.0	28.9	6.0
182	Q86Y07	Serine/threonine-protein kinase VRK2 OS=Homo sapiens GN=VRK2 PE=1 SV=3	0.0	136.1	103.7	0	5	1	0.0	13.6	1.8
185	P84103	Serine/arginine-rich splicing factor 3 OS=Homo sapiens GN=SRSF3 PE=1 SV=1	0.0	246.1	79.9	0	5	1	0.0	36.6	12.8
187	Q8NEM2	SHC SH2 domain-binding protein 1 OS=Homo sapiens GN=SHCBP1 PE=1 SV=3	0.0	191.8	69.4	0	5	1	0.0	8.3	1.2
192	Q9UHA3	Probable ribosome biogenesis protein RLP24 OS=Homo sapiens GN=RSL24D1 PE=1 SV=1	0.0	141.8	54.2	0	5	1	0.0	20.9	7.4
201	Q5VIR6	Vacuolar protein sorting-associated protein 53 homolog OS=Homo sapiens GN=VPS53 PE=1 SV=1	0.0	175.7	71.4	0	5	1	0.0	10.9	3.4

## Sheet: A+B
			Mascot Score			No of peptides			Sequence coverage %
Row	Accession	Name	empty vector	Ki67	TRIM	empty vector	Ki67	TRIM	empty vector	Ki67	TRIM
1	P68871	Hemoglobin subunit beta OS=Homo sapiens GN=HBB PE=1 SV=2	57.0	432.5	0.0	1	8	0	8.8	55.1	0.0
2	Q9UQ13	Leucine-rich repeat protein SHOC-2 OS=Homo sapiens GN=SHOC2 PE=1 SV=2	54.9	431.5	0.0	2	8	0	3.1	18.4	0.0
3	P49116	Nuclear receptor subfamily 2 group C member 2 OS=Homo sapiens GN=NR2C2 PE=1 SV=1	70.2	384.6	0.0	2	7	0	4.4	17.3	0.0
4	P01857	Ig gamma-1 chain C region OS=Homo sapiens GN=IGHG1 PE=1 SV=1	101.6	319.5	0.0	1	7	0	3.6	30.3	0.0
5	Q9BV38	WD repeat-containing protein 18 OS=Homo sapiens GN=WDR18 PE=1 SV=2	58.0	356.1	0.0	1	7	0	2.1	19.0	0.0
6	Q5QJE6	Deoxynucleotidyltransferase terminal-interacting protein 2 OS=Homo sapiens GN=DNTTIP2 PE=1 SV=2	73.9	311.8	0.0	2	6	0	2.6	10.4	0.0
7	P06702	Protein S100-A9 OS=Homo sapiens GN=S100A9 PE=1 SV=1	305.0	295.3	0.0	6	5	0	49.1	49.1	0.0
8	P69905	Hemoglobin subunit alpha OS=Homo sapiens GN=HBA1 PE=1 SV=2	52.5	187.9	0.0	1	5	0	10.6	28.2	0.0
9	Q6NXT2	Histone H3.3C OS=Homo sapiens GN=H3F3C PE=1 SV=3	129.1	164.6	0.0	3	4	0	16.3	16.3	0.0
10	P01616	Ig kappa chain V-II region MIL OS=Homo sapiens PE=1 SV=1	220.7	236.2	0.0	2	3	0	14.3	14.3	0.0
11	Q9NSB2	Keratin, type II cuticular Hb4 OS=Homo sapiens GN=KRT84 PE=2 SV=2	651.6	302.3	0.0	9	3	0	19.8	6.8	0.0
12	P14618	Pyruvate kinase PKM OS=Homo sapiens GN=PKM PE=1 SV=4	155.3	126.9	0.0	3	3	0	8.9	7.9	0.0
13	Q96P63	Serpin B12 OS=Homo sapiens GN=SERPINB12 PE=1 SV=1	346.3	115.0	0.0	9	3	0	29.1	8.6	0.0
14	Q15517	Corneodesmosin OS=Homo sapiens GN=CDSN PE=1 SV=3	159.5	54.9	0.0	4	2	0	9.6	5.1	0.0
15	P47756	F-actin-capping protein subunit beta OS=Homo sapiens GN=CAPZB PE=1 SV=4	55.0	86.4	0.0	2	2	0	5.1	9.7	0.0
16	Q6ZVX7	F-box only protein 50 OS=Homo sapiens GN=NCCRP1 PE=1 SV=1	121.7	68.4	0.0	3	2	0	17.8	7.6	0.0
17	Q99873	Protein arginine N-methyltransferase 1 OS=Homo sapiens GN=PRMT1 PE=1 SV=2	123.0	49.2	0.0	4	2	0	13.9	3.9	0.0
18	P08754	Guanine nucleotide-binding protein G(k) subunit alpha OS=Homo sapiens GN=GNAI3 PE=1 SV=3	126.4	106.2	0.0	1	2	0	4.2	6.5	0.0
19	P78386	Keratin, type II cuticular Hb5 OS=Homo sapiens GN=KRT85 PE=1 SV=1	130.0	87.2	0.0	3	2	0	7.1	5.7	0.0
20	Q96QA5	Gasdermin-A OS=Homo sapiens GN=GSDMA PE=1 SV=4	203.4	73.0	0.0	5	2	0	10.1	4.7	0.0
21	P01834	Ig kappa chain C region OS=Homo sapiens GN=IGKC PE=1 SV=1	89.0	120.7	0.0	1	1	0	18.9	18.9	0.0
22	Q06830	Peroxiredoxin-1 OS=Homo sapiens GN=PRDX1 PE=1 SV=1	379.1	121.9	0.0	9	1	0	41.7	5.5	0.0
23	Q9BQG0	Myb-binding protein 1A OS=Homo sapiens GN=MYBBP1A PE=1 SV=2	768.6	52.8	0.0	18	1	0	17.0	0.8	0.0
24	Q5T750	Skin-specific protein 32 OS=Homo sapiens GN=XP32 PE=1 SV=1	64.0	72.3	0.0	2	1	0	3.6	3.2	0.0
25	P0C0S8	Histone H2A type 1 OS=Homo sapiens GN=HIST1H2AG PE=1 SV=2	169.8	376.7	0.0	3	1	0	26.9	22.3	0.0
26	Q16610	Extracellular matrix protein 1 OS=Homo sapiens GN=ECM1 PE=1 SV=2	209.7	53.0	0.0	4	1	0	12.4	2.4	0.0
27	O75223	Gamma-glutamylcyclotransferase OS=Homo sapiens GN=GGCT PE=1 SV=1	148.9	47.8	0.0	3	1	0	21.3	6.9	0.0

## Sheet: B+C
			Mascot Score			No of peptides			Sequence coverage %
Row	Accession	Name	empty vector	Ki67	TRIM	empty vector	Ki67	TRIM	empty vector	Ki67	TRIM
1	Q9Y4A5	Transformation/transcription domain-associated protein OS=Homo sapiens GN=TRRAP PE=1 SV=3	0.0	1781.4	564.3	0	45	15	0.0	12.9	4.5
2	O75643	U5 small nuclear ribonucleoprotein 200 kDa helicase OS=Homo sapiens GN=SNRNP200 PE=1 SV=2	0.0	1448.4	1199.2	0	36	27	0.0	20.7	14.5
3	Q12789	General transcription factor 3C polypeptide 1 OS=Homo sapiens GN=GTF3C1 PE=1 SV=4	0.0	1436.4	523.8	0	34	15	0.0	19.1	8.1
4	P46821	Microtubule-associated protein 1B OS=Homo sapiens GN=MAP1B PE=1 SV=2	0.0	1463.9	159.4	0	34	5	0.0	20.1	3.0
5	Q03001	Dystonin OS=Homo sapiens GN=DST PE=1 SV=4	0.0	1392.7	635.3	0	31	13	0.0	5.1	2.2
6	Q6P2Q9	Pre-mRNA-processing-splicing factor 8 OS=Homo sapiens GN=PRPF8 PE=1 SV=2	0.0	1206.0	449.0	0	31	14	0.0	15.0	6.3
7	P54886	Delta-1-pyrroline-5-carboxylate synthase OS=Homo sapiens GN=ALDH18A1 PE=1 SV=2	0.0	1136.2	1025.4	0	28	21	0.0	38.9	27.4
8	P78527	DNA-dependent protein kinase catalytic subunit OS=Homo sapiens GN=PRKDC PE=1 SV=3	0.0	1185.3	634.4	0	27	16	0.0	8.0	4.5
9	Q9Y2X3	Nucleolar protein 58 OS=Homo sapiens GN=NOP58 PE=1 SV=1	0.0	1016.8	302.6	0	24	8	0.0	45.2	18.3
10	Q96L91	E1A-binding protein p400 OS=Homo sapiens GN=EP400 PE=1 SV=4	0.0	1133.4	305.8	0	24	6	0.0	12.0	2.5
11	Q9NXF1	Testis-expressed sequence 10 protein OS=Homo sapiens GN=TEX10 PE=1 SV=2	0.0	1109.0	505.8	0	23	13	0.0	30.6	17.4
12	P51532	Transcription activator BRG1 OS=Homo sapiens GN=SMARCA4 PE=1 SV=2	0.0	1063.4	780.4	0	23	17	0.0	16.2	12.5
13	A5YKK6	CCR4-NOT transcription complex subunit 1 OS=Homo sapiens GN=CNOT1 PE=1 SV=2	0.0	861.0	467.7	0	23	13	0.0	9.7	5.6
14	Q15029	116 kDa U5 small nuclear ribonucleoprotein component OS=Homo sapiens GN=EFTUD2 PE=1 SV=1	0.0	996.9	389.7	0	21	11	0.0	26.5	16.7
15	O76021	Ribosomal L1 domain-containing protein 1 OS=Homo sapiens GN=RSL1D1 PE=1 SV=3	0.0	1079.1	162.5	0	21	5	0.0	32.2	12.0
16	Q9GZR7	ATP-dependent RNA helicase DDX24 OS=Homo sapiens GN=DDX24 PE=1 SV=1	0.0	847.5	137.1	0	20	3	0.0	33.2	4.2
17	P40939	Trifunctional enzyme subunit alpha, mitochondrial OS=Homo sapiens GN=HADHA PE=1 SV=2	0.0	992.6	673.7	0	20	14	0.0	36.0	20.6
18	P42285	Superkiller viralicidic activity 2-like 2 OS=Homo sapiens GN=SKIV2L2 PE=1 SV=3	0.0	732.4	626.3	0	19	17	0.0	18.5	16.8
19	Q8NE71	ATP-binding cassette sub-family F member 1 OS=Homo sapiens GN=ABCF1 PE=1 SV=2	0.0	802.7	802.2	0	18	16	0.0	23.7	21.3
20	Q8WYP5	Protein ELYS OS=Homo sapiens GN=AHCTF1 PE=1 SV=3	0.0	655.0	79.3	0	18	2	0.0	13.1	1.0
21	Q8N8A6	ATP-dependent RNA helicase DDX51 OS=Homo sapiens GN=DDX51 PE=1 SV=3	0.0	827.7	416.4	0	17	11	0.0	32.6	16.7
22	Q9BVP2	Guanine nucleotide-binding protein-like 3 OS=Homo sapiens GN=GNL3 PE=1 SV=2	0.0	701.0	105.4	0	17	2	0.0	33.7	4.7
23	P36578	60S ribosomal protein L4 OS=Homo sapiens GN=RPL4 PE=1 SV=5	0.0	884.7	451.2	0	17	11	0.0	37.9	20.6
24	O15446	DNA-directed RNA polymerase I subunit RPA34 OS=Homo sapiens GN=CD3EAP PE=1 SV=1	0.0	673.5	303.1	0	17	8	0.0	48.8	27.6
25	P38646	Stress-70 protein, mitochondrial OS=Homo sapiens GN=HSPA9 PE=1 SV=2	0.0	924.4	343.2	0	16	7	0.0	32.0	13.7
26	Q9P2D1	Chromodomain-helicase-DNA-binding protein 7 OS=Homo sapiens GN=CHD7 PE=1 SV=3	0.0	764.5	118.9	0	16	2	0.0	6.9	0.8
27	Q02878	60S ribosomal protein L6 OS=Homo sapiens GN=RPL6 PE=1 SV=3	0.0	784.3	499.9	0	15	10	0.0	46.9	36.5
28	Q96BY6	Dedicator of cytokinesis protein 10 OS=Homo sapiens GN=DOCK10 PE=1 SV=3	0.0	725.3	271.7	0	15	5	0.0	8.3	3.1
29	O00429	Dynamin-1-like protein OS=Homo sapiens GN=DNM1L PE=1 SV=2	0.0	642.8	431.2	0	15	8	0.0	32.9	16.0
30	Q9BVQ7	Spermatogenesis-associated protein 5-like protein 1 OS=Homo sapiens GN=SPATA5L1 PE=1 SV=2	0.0	652.1	247.3	0	15	7	0.0	27.4	11.6
31	Q9UG63	ATP-binding cassette sub-family F member 2 OS=Homo sapiens GN=ABCF2 PE=1 SV=2	0.0	468.9	238.7	0	15	7	0.0	22.6	13.2
32	Q9UNX4	WD repeat-containing protein 3 OS=Homo sapiens GN=WDR3 PE=1 SV=1	0.0	738.7	142.5	0	15	5	0.0	23.5	5.5
33	Q08J23	tRNA (cytosine(34)-C(5))-methyltransferase OS=Homo sapiens GN=NSUN2 PE=1 SV=2	0.0	534.8	205.1	0	14	6	0.0	23.2	11.0
34	Q13206	Probable ATP-dependent RNA helicase DDX10 OS=Homo sapiens GN=DDX10 PE=1 SV=2	0.0	727.6	344.1	0	14	7	0.0	21.3	9.7
35	Q96GQ7	Probable ATP-dependent RNA helicase DDX27 OS=Homo sapiens GN=DDX27 PE=1 SV=2	0.0	736.2	100.0	0	14	3	0.0	18.8	3.6
36	Q9NYH9	U3 small nucleolar RNA-associated protein 6 homolog OS=Homo sapiens GN=UTP6 PE=1 SV=2	0.0	431.9	70.7	0	14	2	0.0	24.8	2.7
37	Q13823	Nucleolar GTP-binding protein 2 OS=Homo sapiens GN=GNL2 PE=1 SV=1	0.0	627.9	119.8	0	14	3	0.0	19.3	4.9
38	Q8N1F7	Nuclear pore complex protein Nup93 OS=Homo sapiens GN=NUP93 PE=1 SV=2	0.0	632.6	516.1	0	14	13	0.0	21.9	19.8
39	P19525	Interferon-induced, double-stranded RNA-activated protein kinase OS=Homo sapiens GN=EIF2AK2 PE=1 SV=2	0.0	621.8	345.2	0	14	9	0.0	28.5	19.6
40	Q86XP3	ATP-dependent RNA helicase DDX42 OS=Homo sapiens GN=DDX42 PE=1 SV=1	0.0	632.9	400.8	0	14	9	0.0	21.4	13.0
41	Q8NHQ9	ATP-dependent RNA helicase DDX55 OS=Homo sapiens GN=DDX55 PE=1 SV=3	0.0	587.5	132.8	0	13	5	0.0	27.7	8.8
42	P55060	Exportin-2 OS=Homo sapiens GN=CSE1L PE=1 SV=3	0.0	538.3	112.7	0	13	4	0.0	16.0	4.4
43	Q9Y2L1	Exosome complex exonuclease RRP44 OS=Homo sapiens GN=DIS3 PE=1 SV=2	0.0	539.7	184.4	0	13	4	0.0	16.9	5.4
44	Q9NW13	RNA-binding protein 28 OS=Homo sapiens GN=RBM28 PE=1 SV=3	0.0	555.4	151.0	0	13	4	0.0	18.4	6.7
45	P62424	60S ribosomal protein L7a OS=Homo sapiens GN=RPL7A PE=1 SV=2	0.0	648.8	246.2	0	13	7	0.0	38.0	27.1
46	P62841	40S ribosomal protein S15 OS=Homo sapiens GN=RPS15 PE=1 SV=2	0.0	313.2	178.6	0	13	7	0.0	46.2	32.4
47	P54278	Mismatch repair endonuclease PMS2 OS=Homo sapiens GN=PMS2 PE=1 SV=2	0.0	596.5	238.4	0	13	7	0.0	16.0	10.2
48	Q8IXB1	DnaJ homolog subfamily C member 10 OS=Homo sapiens GN=DNAJC10 PE=1 SV=2	0.0	535.4	467.5	0	12	13	0.0	19.3	19.9
49	Q8N201	Integrator complex subunit 1 OS=Homo sapiens GN=INTS1 PE=1 SV=2	0.0	587.4	421.1	0	12	10	0.0	6.6	5.3
50	Q9H0H5	Rac GTPase-activating protein 1 OS=Homo sapiens GN=RACGAP1 PE=1 SV=1	0.0	579.9	111.0	0	12	2	0.0	25.3	3.8
51	Q9UBD5	Origin recognition complex subunit 3 OS=Homo sapiens GN=ORC3 PE=1 SV=1	0.0	686.3	383.5	0	12	9	0.0	21.5	15.8
52	Q8N5C6	S1 RNA-binding domain-containing protein 1 OS=Homo sapiens GN=SRBD1 PE=1 SV=2	0.0	437.7	205.9	0	12	4	0.0	12.1	4.4
53	Q8WUA4	General transcription factor 3C polypeptide 2 OS=Homo sapiens GN=GTF3C2 PE=1 SV=2	0.0	425.5	207.5	0	12	5	0.0	17.1	5.0
54	Q14498	RNA-binding protein 39 OS=Homo sapiens GN=RBM39 PE=1 SV=2	0.0	544.2	268.1	0	12	6	0.0	28.5	15.5
55	Q14137	Ribosome biogenesis protein BOP1 OS=Homo sapiens GN=BOP1 PE=1 SV=2	0.0	543.1	163.3	0	12	3	0.0	20.4	4.3
56	P53350	Serine/threonine-protein kinase PLK1 OS=Homo sapiens GN=PLK1 PE=1 SV=1	0.0	478.0	260.5	0	12	7	0.0	24.0	13.6
57	O96013	Serine/threonine-protein kinase PAK 4 OS=Homo sapiens GN=PAK4 PE=1 SV=1	0.0	451.6	324.6	0	11	6	0.0	26.1	12.0
58	P54277	PMS1 protein homolog 1 OS=Homo sapiens GN=PMS1 PE=1 SV=1	0.0	535.5	138.3	0	11	4	0.0	14.3	5.2
59	Q92889	DNA repair endonuclease XPF OS=Homo sapiens GN=ERCC4 PE=1 SV=3	0.0	458.6	143.8	0	11	4	0.0	14.8	4.6
60	Q9UNX3	60S ribosomal protein L26-like 1 OS=Homo sapiens GN=RPL26L1 PE=1 SV=1	0.0	537.2	323.3	0	11	1	0.0	50.3	6.2
61	Q8IYI6	Exocyst complex component 8 OS=Homo sapiens GN=EXOC8 PE=1 SV=2	0.0	456.9	294.7	0	11	8	0.0	21.4	16.1
62	Q15061	WD repeat-containing protein 43 OS=Homo sapiens GN=WDR43 PE=1 SV=3	0.0	433.2	193.3	0	11	6	0.0	18.6	10.5
63	P46781	40S ribosomal protein S9 OS=Homo sapiens GN=RPS9 PE=1 SV=3	0.0	476.4	191.1	0	11	7	0.0	45.4	31.4
64	Q13263	Transcription intermediary factor 1-beta OS=Homo sapiens GN=TRIM28 PE=1 SV=5	0.0	411.7	1303.8	0	10	30	0.0	16.9	41.2
65	O60716	Catenin delta-1 OS=Homo sapiens GN=CTNND1 PE=1 SV=1	0.0	340.0	245.2	0	10	4	0.0	13.8	4.9
66	Q9Y3U8	60S ribosomal protein L36 OS=Homo sapiens GN=RPL36 PE=1 SV=3	0.0	249.2	71.7	0	10	4	0.0	37.1	19.0
67	Q9H307	Pinin OS=Homo sapiens GN=PNN PE=1 SV=4	0.0	465.0	76.6	0	10	1	0.0	17.2	1.3
68	P06400	Retinoblastoma-associated protein OS=Homo sapiens GN=RB1 PE=1 SV=2	0.0	470.7	364.3	0	10	7	0.0	13.6	11.4
69	Q8WUM4	Programmed cell death 6-interacting protein OS=Homo sapiens GN=PDCD6IP PE=1 SV=1	0.0	378.1	133.8	0	10	1	0.0	15.6	1.5
70	Q8NI36	WD repeat-containing protein 36 OS=Homo sapiens GN=WDR36 PE=1 SV=1	0.0	540.8	99.6	0	10	2	0.0	13.9	2.7
71	O76094	Signal recognition particle subunit SRP72 OS=Homo sapiens GN=SRP72 PE=1 SV=3	0.0	648.6	489.4	0	10	7	0.0	22.1	16.1
72	Q9BSC4	Nucleolar protein 10 OS=Homo sapiens GN=NOL10 PE=1 SV=1	0.0	522.5	129.5	0	10	4	0.0	14.1	5.8
73	Q9Y262	Eukaryotic translation initiation factor 3 subunit L OS=Homo sapiens GN=EIF3L PE=1 SV=1	0.0	446.1	166.1	0	10	5	0.0	20.7	11.9
74	Q86VP6	Cullin-associated NEDD8-dissociated protein 1 OS=Homo sapiens GN=CAND1 PE=1 SV=2	0.0	370.1	299.5	0	10	7	0.0	10.3	6.8
75	Q9H0D6	5'-3' exoribonuclease 2 OS=Homo sapiens GN=XRN2 PE=1 SV=1	0.0	369.0	117.1	0	10	3	0.0	12.4	3.9
76	Q12830	Nucleosome-remodeling factor subunit BPTF OS=Homo sapiens GN=BPTF PE=1 SV=3	0.0	442.7	227.2	0	10	5	0.0	4.1	2.6
77	P15880	40S ribosomal protein S2 OS=Homo sapiens GN=RPS2 PE=1 SV=2	0.0	436.4	192.8	0	10	5	0.0	35.5	15.0
78	Q9UKD2	mRNA turnover protein 4 homolog OS=Homo sapiens GN=MRTO4 PE=1 SV=2	0.0	410.4	114.8	0	10	2	0.0	34.3	10.9
79	Q9H6W3	Bifunctional lysine-specific demethylase and histidyl-hydroxylase NO66 OS=Homo sapiens GN=NO66 PE=1 SV=2	0.0	375.7	58.7	0	10	2	0.0	17.6	3.1
80	Q96J02	E3 ubiquitin-protein ligase Itchy homolog OS=Homo sapiens GN=ITCH PE=1 SV=2	0.0	477.7	274.1	0	10	7	0.0	15.2	10.2
81	Q3KQU3	MAP7 domain-containing protein 1 OS=Homo sapiens GN=MAP7D1 PE=1 SV=1	0.0	394.2	108.7	0	10	2	0.0	13.3	2.9
82	Q12788	Transducin beta-like protein 3 OS=Homo sapiens GN=TBL3 PE=1 SV=2	0.0	461.0	58.9	0	10	2	0.0	17.7	3.2
83	Q13573	SNW domain-containing protein 1 OS=Homo sapiens GN=SNW1 PE=1 SV=1	0.0	439.9	79.8	0	9	1	0.0	20.7	2.8
84	P61204	ADP-ribosylation factor 3 OS=Homo sapiens GN=ARF3 PE=1 SV=2	0.0	347.8	185.1	0	9	4	0.0	47.5	33.7
85	Q92499	ATP-dependent RNA helicase DDX1 OS=Homo sapiens GN=DDX1 PE=1 SV=2	0.0	397.2	294.9	0	9	8	0.0	16.4	13.2
86	A6NHR9	Structural maintenance of chromosomes flexible hinge domain-containing protein 1 OS=Homo sapiens GN=SMCHD1 PE=1 SV=2	0.0	429.5	255.4	0	9	6	0.0	5.3	3.6
87	Q9NY61	Protein AATF OS=Homo sapiens GN=AATF PE=1 SV=1	0.0	456.2	249.5	0	9	5	0.0	21.8	14.3
88	P26373	60S ribosomal protein L13 OS=Homo sapiens GN=RPL13 PE=1 SV=4	0.0	397.6	324.3	0	9	6	0.0	34.1	25.1
89	Q12996	Cleavage stimulation factor subunit 3 OS=Homo sapiens GN=CSTF3 PE=1 SV=1	0.0	440.0	270.2	0	9	5	0.0	17.0	9.5
90	P62081	40S ribosomal protein S7 OS=Homo sapiens GN=RPS7 PE=1 SV=1	0.0	326.3	177.3	0	9	5	0.0	55.7	32.0
91	O00541	Pescadillo homolog OS=Homo sapiens GN=PES1 PE=1 SV=1	0.0	441.4	60.4	0	9	1	0.0	15.5	1.4
92	P62136	Serine/threonine-protein phosphatase PP1-alpha catalytic subunit OS=Homo sapiens GN=PPP1CA PE=1 SV=1	0.0	486.1	355.5	0	9	6	0.0	30.9	18.8
93	O95782	AP-2 complex subunit alpha-1 OS=Homo sapiens GN=AP2A1 PE=1 SV=3	0.0	413.5	143.6	0	9	5	0.0	12.6	7.3
94	Q12824	SWI/SNF-related matrix-associated actin-dependent regulator of chromatin subfamily B member 1 OS=Homo sapiens GN=SMARCB1 PE=1 SV=2	0.0	335.5	298.7	0	9	7	0.0	26.0	23.9
95	Q9HCE1	Putative helicase MOV-10 OS=Homo sapiens GN=MOV10 PE=1 SV=2	0.0	451.9	56.4	0	9	1	0.0	11.7	1.0
96	Q5T5X7	BEN domain-containing protein 3 OS=Homo sapiens GN=BEND3 PE=1 SV=1	0.0	319.7	65.4	0	9	2	0.0	12.3	2.8
97	P63010	AP-2 complex subunit beta OS=Homo sapiens GN=AP2B1 PE=1 SV=1	0.0	338.8	174.2	0	9	5	0.0	11.2	6.9
98	Q9BQ39	ATP-dependent RNA helicase DDX50 OS=Homo sapiens GN=DDX50 PE=1 SV=1	0.0	525.4	176.1	0	9	1	0.0	15.3	3.0
99	O14578	Citron Rho-interacting kinase OS=Homo sapiens GN=CIT PE=1 SV=2	0.0	289.9	170.7	0	9	4	0.0	5.3	2.3
100	Q9BPX3	Condensin complex subunit 3 OS=Homo sapiens GN=NCAPG PE=1 SV=1	0.0	425.6	307.2	0	9	5	0.0	11.6	5.7
101	Q5SY16	Polynucleotide 5'-hydroxyl-kinase NOL9 OS=Homo sapiens GN=NOL9 PE=1 SV=1	0.0	395.7	189.7	0	9	4	0.0	18.7	6.4
102	Q8TDN6	Ribosome biogenesis protein BRX1 homolog OS=Homo sapiens GN=BRIX1 PE=1 SV=2	0.0	430.7	131.9	0	9	2	0.0	27.8	7.1
103	Q99816	Tumor susceptibility gene 101 protein OS=Homo sapiens GN=TSG101 PE=1 SV=2	0.0	243.2	218.7	0	8	6	0.0	20.8	18.2
104	P51114	Fragile X mental retardation syndrome-related protein 1 OS=Homo sapiens GN=FXR1 PE=1 SV=3	0.0	396.1	97.2	0	8	3	0.0	17.4	6.3
105	Q13356	Peptidyl-prolyl cis-trans isomerase-like 2 OS=Homo sapiens GN=PPIL2 PE=1 SV=1	0.0	373.8	182.8	0	8	3	0.0	18.1	6.9
106	P18887	DNA repair protein XRCC1 OS=Homo sapiens GN=XRCC1 PE=1 SV=2	0.0	335.7	164.3	0	8	5	0.0	17.7	9.5
107	P39019	40S ribosomal protein S19 OS=Homo sapiens GN=RPS19 PE=1 SV=2	0.0	327.0	216.8	0	8	6	0.0	41.4	34.5
108	O75152	Zinc finger CCCH domain-containing protein 11A OS=Homo sapiens GN=ZC3H11A PE=1 SV=3	0.0	301.2	216.1	0	8	5	0.0	11.0	9.1
109	Q9P2I0	Cleavage and polyadenylation specificity factor subunit 2 OS=Homo sapiens GN=CPSF2 PE=1 SV=2	0.0	365.6	106.1	0	8	3	0.0	14.7	4.6
110	Q5C9Z4	Nucleolar MIF4G domain-containing protein 1 OS=Homo sapiens GN=NOM1 PE=1 SV=1	0.0	378.7	194.1	0	8	4	0.0	10.9	5.0
111	P51610	Host cell factor 1 OS=Homo sapiens GN=HCFC1 PE=1 SV=2	0.0	286.5	102.9	0	8	2	0.0	6.2	1.3
112	Q14694	Ubiquitin carboxyl-terminal hydrolase 10 OS=Homo sapiens GN=USP10 PE=1 SV=2	0.0	338.9	149.4	0	8	4	0.0	13.9	7.5
113	O14777	Kinetochore protein NDC80 homolog OS=Homo sapiens GN=NDC80 PE=1 SV=1	0.0	375.5	213.3	0	8	6	0.0	15.1	9.5
114	Q9NUQ8	ATP-binding cassette sub-family F member 3 OS=Homo sapiens GN=ABCF3 PE=1 SV=2	0.0	401.6	290.2	0	8	5	0.0	15.2	8.6
115	Q07157	Tight junction protein ZO-1 OS=Homo sapiens GN=TJP1 PE=1 SV=3	0.0	324.5	183.7	0	8	3	0.0	7.0	2.1
116	P52732	Kinesin-like protein KIF11 OS=Homo sapiens GN=KIF11 PE=1 SV=2	0.0	273.4	118.2	0	8	3	0.0	8.0	2.7
117	Q9BZJ0	Crooked neck-like protein 1 OS=Homo sapiens GN=CRNKL1 PE=1 SV=4	0.0	330.3	226.1	0	8	4	0.0	10.4	5.1
118	O15226	NF-kappa-B-repressing factor OS=Homo sapiens GN=NKRF PE=1 SV=2	0.0	281.1	47.0	0	8	1	0.0	13.2	1.3
119	Q7L0Y3	Mitochondrial ribonuclease P protein 1 OS=Homo sapiens GN=TRMT10C PE=1 SV=2	0.0	310.9	179.0	0	8	4	0.0	18.6	10.7
120	Q96AC1	Fermitin family homolog 2 OS=Homo sapiens GN=FERMT2 PE=1 SV=1	0.0	269.4	287.3	0	8	9	0.0	18.1	23.1
121	O15231	Zinc finger protein 185 OS=Homo sapiens GN=ZNF185 PE=1 SV=3	0.0	424.7	209.2	0	8	5	0.0	17.9	12.5
122	Q96MU7	YTH domain-containing protein 1 OS=Homo sapiens GN=YTHDC1 PE=1 SV=3	0.0	322.9	139.2	0	8	4	0.0	9.5	4.5
123	Q8IYB8	ATP-dependent RNA helicase SUPV3L1, mitochondrial OS=Homo sapiens GN=SUPV3L1 PE=1 SV=1	0.0	322.1	241.0	0	8	6	0.0	12.6	9.0
124	Q99661	Kinesin-like protein KIF2C OS=Homo sapiens GN=KIF2C PE=1 SV=2	0.0	322.9	206.2	0	8	6	0.0	14.2	9.5
125	Q9UJX3	Anaphase-promoting complex subunit 7 OS=Homo sapiens GN=ANAPC7 PE=1 SV=4	0.0	411.1	173.8	0	8	3	0.0	18.2	6.0
126	Q68D10	Protein SPT2 homolog OS=Homo sapiens GN=SPTY2D1 PE=1 SV=3	0.0	298.6	57.0	0	7	2	0.0	10.9	2.9
127	Q75QN2	Integrator complex subunit 8 OS=Homo sapiens GN=INTS8 PE=1 SV=1	0.0	324.6	286.0	0	7	7	0.0	9.5	9.3
128	P55084	Trifunctional enzyme subunit beta, mitochondrial OS=Homo sapiens GN=HADHB PE=1 SV=3	0.0	228.3	88.5	0	7	1	0.0	14.3	1.9
129	Q99848	Probable rRNA-processing protein EBP2 OS=Homo sapiens GN=EBNA1BP2 PE=1 SV=2	0.0	478.3	284.2	0	7	7	0.0	31.0	30.1
130	Q5JTZ9	Alanine--tRNA ligase, mitochondrial OS=Homo sapiens GN=AARS2 PE=1 SV=1	0.0	227.8	47.3	0	7	1	0.0	9.4	1.4
131	Q13283	Ras GTPase-activating protein-binding protein 1 OS=Homo sapiens GN=G3BP1 PE=1 SV=1	0.0	241.7	121.3	0	7	2	0.0	17.8	7.5
132	O60341	Lysine-specific histone demethylase 1A OS=Homo sapiens GN=KDM1A PE=1 SV=2	0.0	256.4	90.4	0	7	3	0.0	9.9	5.0
133	Q9NX58	Cell growth-regulating nucleolar protein OS=Homo sapiens GN=LYAR PE=1 SV=2	0.0	404.6	109.1	0	7	2	0.0	26.6	9.0
134	Q99729	Heterogeneous nuclear ribonucleoprotein A/B OS=Homo sapiens GN=HNRNPAB PE=1 SV=2	0.0	246.5	226.6	0	7	4	0.0	18.4	13.6
135	Q9UBB9	Tuftelin-interacting protein 11 OS=Homo sapiens GN=TFIP11 PE=1 SV=1	0.0	289.8	77.8	0	7	2	0.0	11.2	2.2
136	P23258	Tubulin gamma-1 chain OS=Homo sapiens GN=TUBG1 PE=1 SV=2	0.0	232.0	245.0	0	7	7	0.0	15.3	20.6
137	Q9Y2X9	Zinc finger protein 281 OS=Homo sapiens GN=ZNF281 PE=1 SV=1	0.0	312.5	123.1	0	7	3	0.0	10.2	4.0
138	Q96SB4	SRSF protein kinase 1 OS=Homo sapiens GN=SRPK1 PE=1 SV=2	0.0	253.6	52.4	0	7	2	0.0	11.0	2.9
139	O43913	Origin recognition complex subunit 5 OS=Homo sapiens GN=ORC5 PE=1 SV=1	0.0	242.6	211.6	0	7	6	0.0	16.3	17.5
140	Q13042	Cell division cycle protein 16 homolog OS=Homo sapiens GN=CDC16 PE=1 SV=2	0.0	296.4	95.0	0	7	3	0.0	12.7	5.5
141	Q9BYJ9	YTH domain family protein 1 OS=Homo sapiens GN=YTHDF1 PE=1 SV=1	0.0	212.9	118.2	0	7	2	0.0	16.3	5.5
142	Q9Y2K7	Lysine-specific demethylase 2A OS=Homo sapiens GN=KDM2A PE=1 SV=3	0.0	335.1	250.9	0	7	5	0.0	7.0	4.8
143	Q9BYG3	MKI67 FHA domain-interacting nucleolar phosphoprotein OS=Homo sapiens GN=MKI67IP PE=1 SV=1	0.0	271.8	91.0	0	7	2	0.0	25.9	8.9
144	Q09161	Nuclear cap-binding protein subunit 1 OS=Homo sapiens GN=NCBP1 PE=1 SV=1	0.0	356.5	209.6	0	7	5	0.0	8.6	6.8
145	O60645	Exocyst complex component 3 OS=Homo sapiens GN=EXOC3 PE=1 SV=2	0.0	389.6	337.0	0	7	7	0.0	12.4	11.6
146	O15160	DNA-directed RNA polymerases I and III subunit RPAC1 OS=Homo sapiens GN=POLR1C PE=1 SV=1	0.0	305.1	341.0	0	7	7	0.0	26.6	27.5
147	Q9Y490	Talin-1 OS=Homo sapiens GN=TLN1 PE=1 SV=3	0.0	287.6	230.5	0	7	5	0.0	3.4	2.3
148	Q96Q89	Kinesin-like protein KIF20B OS=Homo sapiens GN=KIF20B PE=1 SV=3	0.0	317.3	52.0	0	7	1	0.0	4.8	0.6
149	Q8IWX8	Calcium homeostasis endoplasmic reticulum protein OS=Homo sapiens GN=CHERP PE=1 SV=3	0.0	202.1	184.1	0	6	4	0.0	8.5	4.9
150	Q92621	Nuclear pore complex protein Nup205 OS=Homo sapiens GN=NUP205 PE=1 SV=3	0.0	309.1	178.4	0	6	5	0.0	3.4	3.5
151	Q9UKF6	Cleavage and polyadenylation specificity factor subunit 3 OS=Homo sapiens GN=CPSF3 PE=1 SV=1	0.0	172.3	84.7	0	6	3	0.0	10.4	4.2
152	Q8WVM0	Dimethyladenosine transferase 1, mitochondrial OS=Homo sapiens GN=TFB1M PE=1 SV=1	0.0	293.8	212.5	0	6	4	0.0	20.5	11.8
153	Q8WUK0	Phosphatidylglycerophosphatase and protein-tyrosine phosphatase 1 OS=Homo sapiens GN=PTPMT1 PE=1 SV=1	0.0	197.1	81.5	0	6	1	0.0	28.9	6.0
154	Q9H0H0	Integrator complex subunit 2 OS=Homo sapiens GN=INTS2 PE=1 SV=2	0.0	259.9	116.4	0	6	2	0.0	8.1	1.7
155	Q9HCS7	Pre-mRNA-splicing factor SYF1 OS=Homo sapiens GN=XAB2 PE=1 SV=2	0.0	344.9	116.6	0	6	2	0.0	7.6	2.7
156	O00255	Menin OS=Homo sapiens GN=MEN1 PE=1 SV=4	0.0	278.6	133.3	0	6	4	0.0	11.1	7.8
157	P04843	Dolichyl-diphosphooligosaccharide--protein glycosyltransferase subunit 1 OS=Homo sapiens GN=RPN1 PE=1 SV=1	0.0	253.9	86.1	0	6	2	0.0	11.2	4.0
158	O43290	U4/U6.U5 tri-snRNP-associated protein 1 OS=Homo sapiens GN=SART1 PE=1 SV=1	0.0	260.2	174.5	0	6	5	0.0	10.4	8.5
159	Q13185	Chromobox protein homolog 3 OS=Homo sapiens GN=CBX3 PE=1 SV=4	0.0	209.6	223.4	0	6	6	0.0	23.0	23.0
160	O75616	GTPase Era, mitochondrial OS=Homo sapiens GN=ERAL1 PE=1 SV=2	0.0	226.0	163.9	0	6	5	0.0	19.0	15.1
161	Q8IXT5	RNA-binding protein 12B OS=Homo sapiens GN=RBM12B PE=1 SV=2	0.0	244.7	187.6	0	6	5	0.0	6.4	4.8
162	Q96A72	Protein mago nashi homolog 2 OS=Homo sapiens GN=MAGOHB PE=1 SV=1	0.0	284.0	142.7	0	6	2	0.0	47.3	20.3
163	Q6FI13	Histone H2A type 2-A OS=Homo sapiens GN=HIST2H2AA3 PE=1 SV=3	0.0	410.2	350.9	0	6	5	0.0	57.7	57.7
164	Q13409	Cytoplasmic dynein 1 intermediate chain 2 OS=Homo sapiens GN=DYNC1I2 PE=1 SV=3	0.0	294.7	361.0	0	6	7	0.0	16.8	20.5
165	P50213	Isocitrate dehydrogenase [NAD] subunit alpha, mitochondrial OS=Homo sapiens GN=IDH3A PE=1 SV=1	0.0	242.7	121.5	0	6	3	0.0	15.6	8.7
166	Q71RC2	La-related protein 4 OS=Homo sapiens GN=LARP4 PE=1 SV=3	0.0	282.6	213.0	0	6	4	0.0	9.9	6.4
167	O95251	Histone acetyltransferase KAT7 OS=Homo sapiens GN=KAT7 PE=1 SV=1	0.0	231.7	107.1	0	6	4	0.0	13.1	10.6
168	Q68CP9	AT-rich interactive domain-containing protein 2 OS=Homo sapiens GN=ARID2 PE=1 SV=2	0.0	224.5	105.4	0	6	2	0.0	3.3	1.1
169	Q14527	Helicase-like transcription factor OS=Homo sapiens GN=HLTF PE=1 SV=2	0.0	307.3	186.5	0	6	5	0.0	6.8	4.6
170	Q9BQ75	Protein CMSS1 OS=Homo sapiens GN=CMSS1 PE=1 SV=2	0.0	180.6	248.4	0	6	8	0.0	18.3	17.6
171	Q9Y4C8	Probable RNA-binding protein 19 OS=Homo sapiens GN=RBM19 PE=1 SV=3	0.0	356.6	87.7	0	6	2	0.0	7.8	3.0
172	P55265	Double-stranded RNA-specific adenosine deaminase OS=Homo sapiens GN=ADAR PE=1 SV=4	0.0	189.8	204.6	0	6	9	0.0	4.8	7.3
173	Q9P2N6	KAT8 regulatory NSL complex subunit 3 OS=Homo sapiens GN=KANSL3 PE=1 SV=2	0.0	241.7	56.4	0	6	2	0.0	12.7	4.6
174	Q8N257	Histone H2B type 3-B OS=Homo sapiens GN=HIST3H2BB PE=1 SV=3	0.0	206.6	206.2	0	6	6	0.0	27.0	27.0
175	P62847	40S ribosomal protein S24 OS=Homo sapiens GN=RPS24 PE=1 SV=1	0.0	223.9	150.3	0	6	4	0.0	29.3	29.3
176	Q9BSJ8	Extended synaptotagmin-1 OS=Homo sapiens GN=ESYT1 PE=1 SV=1	0.0	272.0	252.1	0	6	6	0.0	7.6	8.2
177	Q92522	Histone H1x OS=Homo sapiens GN=H1FX PE=1 SV=1	0.0	230.6	154.5	0	5	3	0.0	23.9	15.5
178	P15927	Replication protein A 32 kDa subunit OS=Homo sapiens GN=RPA2 PE=1 SV=1	0.0	147.9	136.6	0	5	4	0.0	26.7	25.2
179	Q9BW19	Kinesin-like protein KIFC1 OS=Homo sapiens GN=KIFC1 PE=1 SV=2	0.0	302.7	223.0	0	5	6	0.0	10.0	11.7
180	O14965	Aurora kinase A OS=Homo sapiens GN=AURKA PE=1 SV=2	0.0	156.5	145.9	0	5	3	0.0	17.9	9.9
181	Q9NVR2	Integrator complex subunit 10 OS=Homo sapiens GN=INTS10 PE=1 SV=2	0.0	201.4	113.2	0	5	4	0.0	7.0	5.5
182	Q86Y07	Serine/threonine-protein kinase VRK2 OS=Homo sapiens GN=VRK2 PE=1 SV=3	0.0	136.1	103.7	0	5	1	0.0	13.6	1.8
183	Q9NVM9	Protein asunder homolog OS=Homo sapiens GN=ASUN PE=1 SV=2	0.0	172.5	75.6	0	5	2	0.0	7.9	3.5
184	Q9UPT5	Exocyst complex component 7 OS=Homo sapiens GN=EXOC7 PE=1 SV=3	0.0	278.5	137.3	0	5	3	0.0	9.1	7.3
185	P84103	Serine/arginine-rich splicing factor 3 OS=Homo sapiens GN=SRSF3 PE=1 SV=1	0.0	246.1	79.9	0	5	1	0.0	36.6	12.8
186	Q658Y4	Protein FAM91A1 OS=Homo sapiens GN=FAM91A1 PE=1 SV=3	0.0	210.3	136.6	0	5	3	0.0	7.3	3.6
187	Q8NEM2	SHC SH2 domain-binding protein 1 OS=Homo sapiens GN=SHCBP1 PE=1 SV=3	0.0	191.8	69.4	0	5	1	0.0	8.3	1.2
188	P49841	Glycogen synthase kinase-3 beta OS=Homo sapiens GN=GSK3B PE=1 SV=2	0.0	234.5	313.4	0	5	8	0.0	23.3	31.2
189	Q96HW7	Integrator complex subunit 4 OS=Homo sapiens GN=INTS4 PE=1 SV=2	0.0	187.8	244.5	0	5	8	0.0	6.6	8.9
190	Q9UJX6	Anaphase-promoting complex subunit 2 OS=Homo sapiens GN=ANAPC2 PE=1 SV=1	0.0	174.0	147.7	0	5	3	0.0	5.6	4.1
191	P47897	Glutamine--tRNA ligase OS=Homo sapiens GN=QARS PE=1 SV=1	0.0	165.1	175.4	0	5	4	0.0	6.7	5.3
192	Q9UHA3	Probable ribosome biogenesis protein RLP24 OS=Homo sapiens GN=RSL24D1 PE=1 SV=1	0.0	141.8	54.2	0	5	1	0.0	20.9	7.4
193	Q5SSJ5	Heterochromatin protein 1-binding protein 3 OS=Homo sapiens GN=HP1BP3 PE=1 SV=1	0.0	321.0	134.1	0	5	2	0.0	13.0	4.0
194	Q9Y678	Coatomer subunit gamma-1 OS=Homo sapiens GN=COPG1 PE=1 SV=1	0.0	179.1	60.2	0	5	2	0.0	7.7	2.9
195	O43795	Unconventional myosin-Ib OS=Homo sapiens GN=MYO1B PE=1 SV=3	0.0	294.5	196.9	0	5	4	0.0	6.2	4.6
196	P35244	Replication protein A 14 kDa subunit OS=Homo sapiens GN=RPA3 PE=1 SV=1	0.0	168.5	124.8	0	5	4	0.0	54.5	35.5
197	Q7KZF4	Staphylococcal nuclease domain-containing protein 1 OS=Homo sapiens GN=SND1 PE=1 SV=1	0.0	283.8	302.2	0	5	7	0.0	6.0	8.1
198	P06493	Cyclin-dependent kinase 1 OS=Homo sapiens GN=CDK1 PE=1 SV=3	0.0	257.5	280.1	0	5	9	0.0	18.5	33.7
199	P62316	Small nuclear ribonucleoprotein Sm D2 OS=Homo sapiens GN=SNRPD2 PE=1 SV=1	0.0	279.3	202.9	0	5	4	0.0	40.7	32.2
200	Q6ZRS2	Helicase SRCAP OS=Homo sapiens GN=SRCAP PE=1 SV=3	0.0	175.0	69.4	0	5	3	0.0	1.9	1.0
201	Q5VIR6	Vacuolar protein sorting-associated protein 53 homolog OS=Homo sapiens GN=VPS53 PE=1 SV=1	0.0	175.7	71.4	0	5	1	0.0	10.9	3.4
202	Q8IY67	Ribonucleoprotein PTB-binding 1 OS=Homo sapiens GN=RAVER1 PE=1 SV=1	0.0	284.1	81.6	0	5	2	0.0	10.7	5.6
203	P52756	RNA-binding protein 5 OS=Homo sapiens GN=RBM5 PE=1 SV=2	0.0	226.0	87.0	0	5	2	0.0	7.4	2.9
204	O60763	General vesicular transport factor p115 OS=Homo sapiens GN=USO1 PE=1 SV=2	0.0	204.9	204.5	0	5	4	0.0	6.1	5.4
205	Q9C005	Protein dpy-30 homolog OS=Homo sapiens GN=DPY30 PE=1 SV=1	0.0	149.1	69.6	0	4	1	0.0	47.5	20.2
206	Q9Y580	RNA-binding protein 7 OS=Homo sapiens GN=RBM7 PE=1 SV=1	0.0	154.4	84.9	0	4	3	0.0	15.4	11.3
207	Q7L7X3	Serine/threonine-protein kinase TAO1 OS=Homo sapiens GN=TAOK1 PE=1 SV=1	0.0	119.6	69.3	0	4	2	0.0	4.1	2.5
208	P33993	DNA replication licensing factor MCM7 OS=Homo sapiens GN=MCM7 PE=1 SV=4	0.0	196.5	228.0	0	4	5	0.0	7.6	11.5
209	P21796	Voltage-dependent anion-selective channel protein 1 OS=Homo sapiens GN=VDAC1 PE=1 SV=2	0.0	130.0	61.2	0	4	2	0.0	19.1	8.1
210	P07992	DNA excision repair protein ERCC-1 OS=Homo sapiens GN=ERCC1 PE=1 SV=1	0.0	190.8	93.1	0	4	3	0.0	16.8	13.8
211	P07900	Heat shock protein HSP 90-alpha OS=Homo sapiens GN=HSP90AA1 PE=1 SV=5	0.0	644.9	382.0	0	4	2	0.0	6.1	3.0
212	Q9NPE3	H/ACA ribonucleoprotein complex subunit 3 OS=Homo sapiens GN=NOP10 PE=1 SV=1	0.0	173.4	107.1	0	4	1	0.0	45.3	20.3
213	O95235	Kinesin-like protein KIF20A OS=Homo sapiens GN=KIF20A PE=1 SV=1	0.0	135.6	87.9	0	4	2	0.0	6.7	3.4
214	Q9BUJ2	Heterogeneous nuclear ribonucleoprotein U-like protein 1 OS=Homo sapiens GN=HNRNPUL1 PE=1 SV=2	0.0	192.3	49.0	0	4	2	0.0	5.5	2.3
215	P51398	28S ribosomal protein S29, mitochondrial OS=Homo sapiens GN=DAP3 PE=1 SV=1	0.0	138.6	145.5	0	4	4	0.0	14.8	14.8
216	O60934	Nibrin OS=Homo sapiens GN=NBN PE=1 SV=1	0.0	201.7	95.8	0	4	2	0.0	8.1	4.1
217	Q9H9Y6	DNA-directed RNA polymerase I subunit RPA2 OS=Homo sapiens GN=POLR1B PE=1 SV=2	0.0	167.2	91.0	0	4	2	0.0	4.3	1.7
218	Q96QD9	UAP56-interacting factor OS=Homo sapiens GN=FYTTD1 PE=1 SV=3	0.0	184.5	85.0	0	4	1	0.0	12.9	3.5
219	O75676	Ribosomal protein S6 kinase alpha-4 OS=Homo sapiens GN=RPS6KA4 PE=1 SV=1	0.0	221.2	126.1	0	4	3	0.0	6.5	4.3
220	O43684	Mitotic checkpoint protein BUB3 OS=Homo sapiens GN=BUB3 PE=1 SV=1	0.0	179.5	97.0	0	4	3	0.0	12.5	10.4
221	Q86XI2	Condensin-2 complex subunit G2 OS=Homo sapiens GN=NCAPG2 PE=1 SV=1	0.0	227.3	115.1	0	4	3	0.0	4.5	3.6
222	O94782	Ubiquitin carboxyl-terminal hydrolase 1 OS=Homo sapiens GN=USP1 PE=1 SV=1	0.0	129.3	153.3	0	4	4	0.0	5.7	5.9
223	Q9NS91	E3 ubiquitin-protein ligase RAD18 OS=Homo sapiens GN=RAD18 PE=1 SV=2	0.0	215.3	98.7	0	4	3	0.0	8.9	6.7
224	Q92759	General transcription factor IIH subunit 4 OS=Homo sapiens GN=GTF2H4 PE=2 SV=1	0.0	140.0	110.2	0	4	2	0.0	10.2	5.4
225	Q8WX92	Negative elongation factor B OS=Homo sapiens GN=NELFB PE=1 SV=1	0.0	200.9	49.2	0	4	1	0.0	7.9	1.7
226	Q8NDT2	Putative RNA-binding protein 15B OS=Homo sapiens GN=RBM15B PE=1 SV=3	0.0	235.8	86.7	0	4	2	0.0	4.9	1.7
227	Q03113	Guanine nucleotide-binding protein subunit alpha-12 OS=Homo sapiens GN=GNA12 PE=1 SV=4	0.0	149.2	99.2	0	4	3	0.0	9.4	7.3
228	Q9Y2D4	Exocyst complex component 6B OS=Homo sapiens GN=EXOC6B PE=1 SV=3	0.0	162.1	298.2	0	4	8	0.0	6.0	12.3
229	O75494	Serine/arginine-rich splicing factor 10 OS=Homo sapiens GN=SRSF10 PE=1 SV=1	0.0	203.4	84.9	0	4	2	0.0	19.1	10.3
230	Q68E01	Integrator complex subunit 3 OS=Homo sapiens GN=INTS3 PE=1 SV=1	0.0	274.1	114.7	0	4	3	0.0	6.3	5.6
231	O00303	Eukaryotic translation initiation factor 3 subunit F OS=Homo sapiens GN=EIF3F PE=1 SV=1	0.0	226.5	250.9	0	4	4	0.0	15.7	17.4
232	Q9BXP5	Serrate RNA effector molecule homolog OS=Homo sapiens GN=SRRT PE=1 SV=1	0.0	219.4	127.1	0	4	3	0.0	5.6	3.5
233	Q08AF3	Schlafen family member 5 OS=Homo sapiens GN=SLFN5 PE=1 SV=1	0.0	173.7	100.2	0	4	2	0.0	4.7	2.8
234	P37108	Signal recognition particle 14 kDa protein OS=Homo sapiens GN=SRP14 PE=1 SV=2	0.0	196.9	143.2	0	4	4	0.0	27.2	27.2
235	Q9BYD1	39S ribosomal protein L13, mitochondrial OS=Homo sapiens GN=MRPL13 PE=1 SV=1	0.0	153.2	53.7	0	4	2	0.0	25.3	11.2
236	Q13472	DNA topoisomerase 3-alpha OS=Homo sapiens GN=TOP3A PE=1 SV=1	0.0	254.4	99.4	0	4	2	0.0	4.8	1.9
237	Q9Y2P8	RNA 3'-terminal phosphate cyclase-like protein OS=Homo sapiens GN=RCL1 PE=1 SV=3	0.0	199.3	72.0	0	4	2	0.0	13.4	4.3
238	Q8N442	Translation factor GUF1, mitochondrial OS=Homo sapiens GN=GUF1 PE=1 SV=1	0.0	261.2	124.6	0	4	3	0.0	8.4	5.8
239	Q8TDX7	Serine/threonine-protein kinase Nek7 OS=Homo sapiens GN=NEK7 PE=1 SV=1	0.0	116.0	82.3	0	4	3	0.0	8.6	14.2
240	P18085	ADP-ribosylation factor 4 OS=Homo sapiens GN=ARF4 PE=1 SV=3	0.0	223.2	79.3	0	4	1	0.0	13.9	3.9
241	P52434	DNA-directed RNA polymerases I, II, and III subunit RPABC3 OS=Homo sapiens GN=POLR2H PE=1 SV=4	0.0	184.8	134.9	0	4	2	0.0	26.7	16.0
242	Q96G21	U3 small nucleolar ribonucleoprotein protein IMP4 OS=Homo sapiens GN=IMP4 PE=1 SV=1	0.0	183.4	67.9	0	4	2	0.0	16.2	6.9
243	O94874	E3 UFM1-protein ligase 1 OS=Homo sapiens GN=UFL1 PE=1 SV=2	0.0	155.3	76.1	0	4	2	0.0	5.5	2.6
244	Q8WXX5	DnaJ homolog subfamily C member 9 OS=Homo sapiens GN=DNAJC9 PE=1 SV=1	0.0	122.3	95.2	0	3	2	0.0	12.3	8.1
245	Q13868	Exosome complex component RRP4 OS=Homo sapiens GN=EXOSC2 PE=1 SV=2	0.0	139.2	68.2	0	3	2	0.0	13.0	7.8
246	Q8IXQ6	Poly [ADP-ribose] polymerase 9 OS=Homo sapiens GN=PARP9 PE=1 SV=2	0.0	112.3	78.8	0	3	3	0.0	4.6	4.6
247	P42766	60S ribosomal protein L35 OS=Homo sapiens GN=RPL35 PE=1 SV=2	0.0	178.5	123.4	0	3	3	0.0	26.0	26.0
248	Q9ULR0	Pre-mRNA-splicing factor ISY1 homolog OS=Homo sapiens GN=ISY1 PE=1 SV=3	0.0	142.5	68.6	0	3	1	0.0	16.1	4.9
249	Q99504	Eyes absent homolog 3 OS=Homo sapiens GN=EYA3 PE=1 SV=3	0.0	148.8	57.7	0	3	2	0.0	9.4	4.9
250	Q6UXN9	WD repeat-containing protein 82 OS=Homo sapiens GN=WDR82 PE=1 SV=1	0.0	176.3	136.0	0	3	2	0.0	12.5	6.1
251	Q9HBI1	Beta-parvin OS=Homo sapiens GN=PARVB PE=1 SV=1	0.0	127.3	151.9	0	3	3	0.0	11.5	11.5
252	Q9NTX5	Ethylmalonyl-CoA decarboxylase OS=Homo sapiens GN=ECHDC1 PE=1 SV=2	0.0	99.7	80.1	0	3	2	0.0	13.4	9.4
253	P49458	Signal recognition particle 9 kDa protein OS=Homo sapiens GN=SRP9 PE=1 SV=2	0.0	80.6	59.9	0	3	2	0.0	22.1	22.1
254	Q9NSD9	Phenylalanine--tRNA ligase beta subunit OS=Homo sapiens GN=FARSB PE=1 SV=3	0.0	133.6	118.7	0	3	2	0.0	4.6	2.9
255	O14497	AT-rich interactive domain-containing protein 1A OS=Homo sapiens GN=ARID1A PE=1 SV=3	0.0	157.5	71.6	0	3	1	0.0	1.8	0.7
256	Q9Y5X2	Sorting nexin-8 OS=Homo sapiens GN=SNX8 PE=1 SV=1	0.0	164.7	66.2	0	3	2	0.0	8.4	5.8
257	P07305	Histone H1.0 OS=Homo sapiens GN=H1F0 PE=1 SV=3	0.0	97.9	47.6	0	3	1	0.0	11.3	6.7
258	P46734	Dual specificity mitogen-activated protein kinase kinase 3 OS=Homo sapiens GN=MAP2K3 PE=1 SV=2	0.0	151.9	79.4	0	3	2	0.0	10.4	8.1
259	Q9UID3	Vacuolar protein sorting-associated protein 51 homolog OS=Homo sapiens GN=VPS51 PE=1 SV=2	0.0	143.0	130.8	0	3	3	0.0	5.6	6.4
260	Q96BK5	PIN2/TERF1-interacting telomerase inhibitor 1 OS=Homo sapiens GN=PINX1 PE=1 SV=2	0.0	146.1	74.6	0	3	1	0.0	14.9	4.9
261	Q9ULX3	RNA-binding protein NOB1 OS=Homo sapiens GN=NOB1 PE=1 SV=1	0.0	128.4	86.0	0	3	2	0.0	9.0	7.8
262	Q9UN86	Ras GTPase-activating protein-binding protein 2 OS=Homo sapiens GN=G3BP2 PE=1 SV=2	0.0	218.2	156.1	0	3	4	0.0	9.5	11.0
263	P20226	TATA-box-binding protein OS=Homo sapiens GN=TBP PE=1 SV=2	0.0	142.3	119.7	0	3	4	0.0	8.3	11.2
264	Q9HCD5	Nuclear receptor coactivator 5 OS=Homo sapiens GN=NCOA5 PE=1 SV=2	0.0	198.6	68.2	0	3	1	0.0	5.9	1.0
265	Q07021	Complement component 1 Q subcomponent-binding protein, mitochondrial OS=Homo sapiens GN=C1QBP PE=1 SV=1	0.0	178.8	61.8	0	3	1	0.0	16.7	5.0
266	Q9Y3L3	SH3 domain-binding protein 1 OS=Homo sapiens GN=SH3BP1 PE=1 SV=3	0.0	169.8	81.9	0	3	3	0.0	4.4	5.6
267	O43823	A-kinase anchor protein 8 OS=Homo sapiens GN=AKAP8 PE=1 SV=1	0.0	162.5	54.6	0	3	1	0.0	7.4	2.9
268	Q9UGR2	Zinc finger CCCH domain-containing protein 7B OS=Homo sapiens GN=ZC3H7B PE=1 SV=1	0.0	138.2	51.4	0	3	2	0.0	3.5	2.5
269	Q9UBB5	Methyl-CpG-binding domain protein 2 OS=Homo sapiens GN=MBD2 PE=1 SV=1	0.0	177.7	88.6	0	3	2	0.0	9.5	5.8
270	P55081	Microfibrillar-associated protein 1 OS=Homo sapiens GN=MFAP1 PE=1 SV=2	0.0	178.2	58.3	0	3	2	0.0	13.4	7.7
271	Q8TEX9	Importin-4 OS=Homo sapiens GN=IPO4 PE=1 SV=2	0.0	158.2	50.5	0	3	2	0.0	3.4	1.6
272	O75821	Eukaryotic translation initiation factor 3 subunit G OS=Homo sapiens GN=EIF3G PE=1 SV=2	0.0	132.8	72.7	0	3	2	0.0	14.1	9.1
273	P09543	2',3'-cyclic-nucleotide 3'-phosphodiesterase OS=Homo sapiens GN=CNP PE=1 SV=2	0.0	153.0	78.6	0	3	2	0.0	9.7	5.5
274	Q02750	Dual specificity mitogen-activated protein kinase kinase 1 OS=Homo sapiens GN=MAP2K1 PE=1 SV=2	0.0	137.1	93.5	0	3	2	0.0	10.4	6.6
275	Q6P087	RNA pseudouridylate synthase domain-containing protein 3 OS=Homo sapiens GN=RPUSD3 PE=1 SV=3	0.0	138.5	114.6	0	3	2	0.0	6.8	4.3
276	O00471	Exocyst complex component 5 OS=Homo sapiens GN=EXOC5 PE=1 SV=1	0.0	145.0	102.8	0	3	2	0.0	4.2	3.5
277	Q14699	Raftlin OS=Homo sapiens GN=RFTN1 PE=1 SV=4	0.0	131.1	83.4	0	3	1	0.0	12.1	3.3
278	Q8IVS2	Malonyl-CoA-acyl carrier protein transacylase, mitochondrial OS=Homo sapiens GN=MCAT PE=1 SV=2	0.0	96.9	128.6	0	3	3	0.0	10.0	12.8
279	P63167	Dynein light chain 1, cytoplasmic OS=Homo sapiens GN=DYNLL1 PE=1 SV=1	0.0	151.6	75.0	0	3	2	0.0	49.4	37.1
280	P49207	60S ribosomal protein L34 OS=Homo sapiens GN=RPL34 PE=1 SV=3	0.0	93.0	47.2	0	3	2	0.0	13.7	7.7
281	Q96EY1	DnaJ homolog subfamily A member 3, mitochondrial OS=Homo sapiens GN=DNAJA3 PE=1 SV=2	0.0	101.0	97.0	0	3	3	0.0	10.6	10.6
282	Q5RKV6	Exosome complex component MTR3 OS=Homo sapiens GN=EXOSC6 PE=1 SV=1	0.0	151.8	58.8	0	3	1	0.0	15.4	5.9
283	Q96C36	Pyrroline-5-carboxylate reductase 2 OS=Homo sapiens GN=PYCR2 PE=1 SV=1	0.0	110.5	49.6	0	3	1	0.0	14.7	5.3
284	P61244	Protein max OS=Homo sapiens GN=MAX PE=1 SV=1	0.0	131.1	89.6	0	3	2	0.0	25.0	11.9
285	Q96KG9	N-terminal kinase-like protein OS=Homo sapiens GN=SCYL1 PE=1 SV=1	0.0	139.6	205.5	0	3	3	0.0	5.6	5.6
286	Q9Y3B4	Pre-mRNA branch site protein p14 OS=Homo sapiens GN=SF3B14 PE=1 SV=1	0.0	138.9	116.3	0	3	2	0.0	20.8	20.8
287	Q92785	Zinc finger protein ubi-d4 OS=Homo sapiens GN=DPF2 PE=1 SV=2	0.0	195.0	173.5	0	3	4	0.0	13.6	15.9
288	Q8NEJ9	Neuroguidin OS=Homo sapiens GN=NGDN PE=1 SV=1	0.0	227.0	107.5	0	3	3	0.0	13.0	11.1
289	P62995	Transformer-2 protein homolog beta OS=Homo sapiens GN=TRA2B PE=1 SV=1	0.0	182.2	143.3	0	3	3	0.0	13.9	13.9
290	P49411	Elongation factor Tu, mitochondrial OS=Homo sapiens GN=TUFM PE=1 SV=2	0.0	160.9	88.6	0	3	2	0.0	8.6	5.5
291	Q9UL03	Integrator complex subunit 6 OS=Homo sapiens GN=INTS6 PE=1 SV=1	0.0	192.1	68.3	0	3	1	0.0	3.3	1.4
292	P35232	Prohibitin OS=Homo sapiens GN=PHB PE=1 SV=1	0.0	119.8	47.3	0	3	1	0.0	11.4	3.7
293	Q96TA1	Niban-like protein 1 OS=Homo sapiens GN=FAM129B PE=1 SV=3	0.0	117.6	57.0	0	3	2	0.0	6.2	4.4
294	P09661	U2 small nuclear ribonucleoprotein A' OS=Homo sapiens GN=SNRPA1 PE=1 SV=2	0.0	107.8	74.2	0	3	2	0.0	14.5	7.8
295	Q03135	Caveolin-1 OS=Homo sapiens GN=CAV1 PE=1 SV=4	0.0	78.9	63.1	0	3	2	0.0	23.0	11.2
296	P52926	High mobility group protein HMGI-C OS=Homo sapiens GN=HMGA2 PE=1 SV=1	0.0	86.8	53.5	0	3	2	0.0	38.5	21.1
297	Q7L8L6	FAST kinase domain-containing protein 5 OS=Homo sapiens GN=FASTKD5 PE=1 SV=1	0.0	98.0	50.5	0	3	2	0.0	4.3	2.4
298	Q96DI7	U5 small nuclear ribonucleoprotein 40 kDa protein OS=Homo sapiens GN=SNRNP40 PE=1 SV=1	0.0	151.4	116.9	0	3	1	0.0	7.6	3.4
299	Q9H0U4	Ras-related protein Rab-1B OS=Homo sapiens GN=RAB1B PE=1 SV=1	0.0	74.6	56.3	0	2	1	0.0	10.9	5.5
300	Q9UHD2	Serine/threonine-protein kinase TBK1 OS=Homo sapiens GN=TBK1 PE=1 SV=1	0.0	127.1	110.6	0	2	2	0.0	3.4	3.4
301	Q9BRT6	Protein LLP homolog OS=Homo sapiens GN=LLPH PE=2 SV=1	0.0	146.1	66.7	0	2	1	0.0	23.3	10.9
302	Q9H147	Deoxynucleotidyltransferase terminal-interacting protein 1 OS=Homo sapiens GN=DNTTIP1 PE=1 SV=2	0.0	150.9	96.5	0	2	2	0.0	6.1	6.1
303	Q15084	Protein disulfide-isomerase A6 OS=Homo sapiens GN=PDIA6 PE=1 SV=1	0.0	87.4	113.4	0	2	2	0.0	7.0	7.0
304	P62861	40S ribosomal protein S30 OS=Homo sapiens GN=FAU PE=1 SV=1	0.0	81.7	60.5	0	2	1	0.0	18.6	16.9
305	Q8WWK9	Cytoskeleton-associated protein 2 OS=Homo sapiens GN=CKAP2 PE=1 SV=1	0.0	49.8	90.6	0	2	1	0.0	4.0	1.9
306	Q08945	FACT complex subunit SSRP1 OS=Homo sapiens GN=SSRP1 PE=1 SV=1	0.0	116.2	103.6	0	2	3	0.0	3.2	4.8
307	Q9NRC6	Spectrin beta chain, non-erythrocytic 5 OS=Homo sapiens GN=SPTBN5 PE=1 SV=1	0.0	155.6	104.0	0	2	1	0.0	0.4	0.2
308	P31689	DnaJ homolog subfamily A member 1 OS=Homo sapiens GN=DNAJA1 PE=1 SV=2	0.0	142.3	305.6	0	2	7	0.0	6.5	26.4
309	O75165	DnaJ homolog subfamily C member 13 OS=Homo sapiens GN=DNAJC13 PE=1 SV=5	0.0	98.5	68.6	0	2	2	0.0	1.2	1.9
310	P62304	Small nuclear ribonucleoprotein E OS=Homo sapiens GN=SNRPE PE=1 SV=1	0.0	58.1	51.0	0	2	2	0.0	12.0	12.0
311	Q86X51	Uncharacterized protein CXorf67 OS=Homo sapiens GN=CXorf67 PE=2 SV=1	0.0	83.3	68.9	0	2	2	0.0	4.0	4.0
312	P20042	Eukaryotic translation initiation factor 2 subunit 2 OS=Homo sapiens GN=EIF2S2 PE=1 SV=2	0.0	63.4	54.7	0	2	1	0.0	7.5	3.0
313	Q9H2F5	Enhancer of polycomb homolog 1 OS=Homo sapiens GN=EPC1 PE=1 SV=1	0.0	71.0	110.5	0	2	3	0.0	2.5	4.3
314	Q9BT17	Mitochondrial ribosome-associated GTPase 1 OS=Homo sapiens GN=MTG1 PE=1 SV=2	0.0	61.4	57.4	0	2	2	0.0	5.4	5.4
315	Q8N2W9	E3 SUMO-protein ligase PIAS4 OS=Homo sapiens GN=PIAS4 PE=1 SV=1	0.0	69.5	50.2	0	2	1	0.0	2.9	1.4
316	Q9BZ95	Histone-lysine N-methyltransferase NSD3 OS=Homo sapiens GN=WHSC1L1 PE=1 SV=1	0.0	168.7	72.0	0	2	1	0.0	2.6	1.6
317	Q8IVH8	Mitogen-activated protein kinase kinase kinase kinase 3 OS=Homo sapiens GN=MAP4K3 PE=1 SV=1	0.0	104.4	73.6	0	2	2	0.0	2.5	2.5
318	P17480	Nucleolar transcription factor 1 OS=Homo sapiens GN=UBTF PE=1 SV=1	0.0	69.7	107.1	0	2	2	0.0	3.4	3.4
319	Q96B26	Exosome complex component RRP43 OS=Homo sapiens GN=EXOSC8 PE=1 SV=1	0.0	120.3	72.6	0	2	2	0.0	16.7	8.0
320	Q00325	Phosphate carrier protein, mitochondrial OS=Homo sapiens GN=SLC25A3 PE=1 SV=2	0.0	69.8	59.1	0	2	2	0.0	5.5	5.5
321	Q13620	Cullin-4B OS=Homo sapiens GN=CUL4B PE=1 SV=4	0.0	82.1	60.8	0	2	1	0.0	2.5	1.3
322	Q96AG4	Leucine-rich repeat-containing protein 59 OS=Homo sapiens GN=LRRC59 PE=1 SV=1	0.0	60.2	94.2	0	2	3	0.0	7.2	10.4
323	Q8TDB6	E3 ubiquitin-protein ligase DTX3L OS=Homo sapiens GN=DTX3L PE=1 SV=1	0.0	129.8	76.1	0	2	2	0.0	3.8	3.8
324	Q96FK6	WD repeat-containing protein 89 OS=Homo sapiens GN=WDR89 PE=1 SV=1	0.0	112.2	49.6	0	2	2	0.0	6.5	7.8
325	A8MWD9	Small nuclear ribonucleoprotein G-like protein OS=Homo sapiens PE=3 SV=2	0.0	61.2	70.8	0	2	3	0.0	17.1	17.1
326	Q9HCU9	Breast cancer metastasis-suppressor 1 OS=Homo sapiens GN=BRMS1 PE=1 SV=1	0.0	73.7	63.0	0	2	2	0.0	11.0	11.0
327	Q96ME7	Zinc finger protein 512 OS=Homo sapiens GN=ZNF512 PE=1 SV=2	0.0	96.7	50.3	0	2	1	0.0	4.4	1.9
328	Q8TAG9	Exocyst complex component 6 OS=Homo sapiens GN=EXOC6 PE=1 SV=3	0.0	131.4	116.7	0	2	1	0.0	4.0	1.5
329	Q9P270	SLAIN motif-containing protein 2 OS=Homo sapiens GN=SLAIN2 PE=1 SV=2	0.0	71.2	47.9	0	2	2	0.0	7.6	5.3
330	Q13601	KRR1 small subunit processome component homolog OS=Homo sapiens GN=KRR1 PE=1 SV=4	0.0	122.8	49.9	0	2	1	0.0	6.0	3.7
331	Q3ZCQ8	Mitochondrial import inner membrane translocase subunit TIM50 OS=Homo sapiens GN=TIMM50 PE=1 SV=2	0.0	107.4	59.6	0	2	1	0.0	7.6	4.8
332	Q6P5R6	60S ribosomal protein L22-like 1 OS=Homo sapiens GN=RPL22L1 PE=1 SV=2	0.0	102.5	74.4	0	2	2	0.0	29.5	29.5
333	Q9H9Q4	Non-homologous end-joining factor 1 OS=Homo sapiens GN=NHEJ1 PE=1 SV=1	0.0	67.3	115.7	0	2	2	0.0	10.7	10.7
334	P63000	Ras-related C3 botulinum toxin substrate 1 OS=Homo sapiens GN=RAC1 PE=1 SV=1	0.0	49.3	48.9	0	2	2	0.0	11.5	11.5
335	Q13330	Metastasis-associated protein MTA1 OS=Homo sapiens GN=MTA1 PE=1 SV=2	0.0	370.2	199.3	0	2	2	0.0	3.4	3.1
336	Q9Y5M8	Signal recognition particle receptor subunit beta OS=Homo sapiens GN=SRPRB PE=1 SV=3	0.0	56.0	49.0	0	2	1	0.0	9.2	7.0
337	O15145	Actin-related protein 2/3 complex subunit 3 OS=Homo sapiens GN=ARPC3 PE=1 SV=3	0.0	73.5	64.0	0	2	2	0.0	13.5	13.5
338	P17096	High mobility group protein HMG-I/HMG-Y OS=Homo sapiens GN=HMGA1 PE=1 SV=3	0.0	62.4	74.4	0	2	2	0.0	32.7	23.4
339	Q9UHD8	Septin-9 OS=Homo sapiens GN=SEPT9 PE=1 SV=2	0.0	127.1	114.4	0	2	2	0.0	3.8	3.8
340	P62314	Small nuclear ribonucleoprotein Sm D1 OS=Homo sapiens GN=SNRPD1 PE=1 SV=1	0.0	142.5	108.2	0	2	2	0.0	27.7	27.7
341	P17812	CTP synthase 1 OS=Homo sapiens GN=CTPS1 PE=1 SV=2	0.0	105.2	88.3	0	2	2	0.0	4.4	2.9
342	P50750	Cyclin-dependent kinase 9 OS=Homo sapiens GN=CDK9 PE=1 SV=3	0.0	140.7	172.7	0	2	2	0.0	5.6	5.6
343	Q9NVF7	F-box only protein 28 OS=Homo sapiens GN=FBXO28 PE=1 SV=1	0.0	99.0	88.6	0	2	2	0.0	10.1	10.1
344	P41208	Centrin-2 OS=Homo sapiens GN=CETN2 PE=1 SV=1	0.0	89.6	66.2	0	2	1	0.0	16.9	9.9
345	P61225	Ras-related protein Rap-2b OS=Homo sapiens GN=RAP2B PE=1 SV=1	0.0	63.6	64.8	0	2	2	0.0	12.0	12.6
346	Q9ULX9	Transcription factor MafF OS=Homo sapiens GN=MAFF PE=1 SV=2	0.0	64.7	94.2	0	2	2	0.0	9.8	9.8
347	P63104	14-3-3 protein zeta/delta OS=Homo sapiens GN=YWHAZ PE=1 SV=1	0.0	112.9	152.6	0	2	2	0.0	9.8	10.6
348	Q8IVF2	Protein AHNAK2 OS=Homo sapiens GN=AHNAK2 PE=1 SV=2	0.0	121.4	197.6	0	2	4	0.0	0.4	0.8
349	Q8IX18	Probable ATP-dependent RNA helicase DHX40 OS=Homo sapiens GN=DHX40 PE=1 SV=2	0.0	98.0	134.0	0	2	3	0.0	3.2	4.1
350	Q13595	Transformer-2 protein homolog alpha OS=Homo sapiens GN=TRA2A PE=1 SV=1	0.0	104.5	47.0	0	2	1	0.0	8.2	5.0
351	Q9UNF1	Melanoma-associated antigen D2 OS=Homo sapiens GN=MAGED2 PE=1 SV=2	0.0	95.6	56.8	0	2	1	0.0	4.1	2.1
352	P24941	Cyclin-dependent kinase 2 OS=Homo sapiens GN=CDK2 PE=1 SV=2	0.0	112.1	131.8	0	2	3	0.0	8.1	10.4
353	Q68EM7	Rho GTPase-activating protein 17 OS=Homo sapiens GN=ARHGAP17 PE=1 SV=1	0.0	82.0	78.1	0	2	2	0.0	3.6	3.5
354	Q9BWF3	RNA-binding protein 4 OS=Homo sapiens GN=RBM4 PE=1 SV=1	0.0	116.4	148.8	0	2	3	0.0	6.6	9.1
355	Q4W5G0	Tigger transposable element-derived protein 2 OS=Homo sapiens GN=TIGD2 PE=2 SV=1	0.0	88.5	71.6	0	2	1	0.0	5.5	3.0
356	Q99439	Calponin-2 OS=Homo sapiens GN=CNN2 PE=1 SV=4	0.0	81.4	151.5	0	2	4	0.0	8.7	15.9
357	Q86VN1	Vacuolar protein-sorting-associated protein 36 OS=Homo sapiens GN=VPS36 PE=1 SV=1	0.0	118.6	79.6	0	2	2	0.0	6.2	5.2
358	P22670	MHC class II regulatory factor RFX1 OS=Homo sapiens GN=RFX1 PE=1 SV=2	0.0	84.3	96.7	0	1	2	0.0	1.2	2.6
359	Q15233	Non-POU domain-containing octamer-binding protein OS=Homo sapiens GN=NONO PE=1 SV=4	0.0	59.0	139.4	0	1	3	0.0	1.9	4.5
360	Q13951	Core-binding factor subunit beta OS=Homo sapiens GN=CBFB PE=1 SV=2	0.0	90.6	100.8	0	1	1	0.0	8.8	8.8
361	P25398	40S ribosomal protein S12 OS=Homo sapiens GN=RPS12 PE=1 SV=3	0.0	62.1	73.9	0	1	2	0.0	7.6	13.6
362	P50914	60S ribosomal protein L14 OS=Homo sapiens GN=RPL14 PE=1 SV=4	0.0	66.5	56.1	0	1	1	0.0	5.6	5.6
363	Q14320	Protein FAM50A OS=Homo sapiens GN=FAM50A PE=1 SV=2	0.0	70.0	101.5	0	1	2	0.0	4.1	8.8
364	P43355	Melanoma-associated antigen 1 OS=Homo sapiens GN=MAGEA1 PE=1 SV=1	0.0	100.9	93.8	0	1	2	0.0	2.3	5.8
365	Q8IUE6	Histone H2A type 2-B OS=Homo sapiens GN=HIST2H2AB PE=1 SV=3	0.0	276.1	179.6	0	1	1	0.0	5.4	5.4
366	Q92900	Regulator of nonsense transcripts 1 OS=Homo sapiens GN=UPF1 PE=1 SV=2	0.0	78.2	117.5	0	1	3	0.0	0.8	2.8
367	Q14674	Separin OS=Homo sapiens GN=ESPL1 PE=1 SV=3	0.0	78.1	96.2	0	1	2	0.0	0.5	1.2
368	Q9Y676	28S ribosomal protein S18b, mitochondrial OS=Homo sapiens GN=MRPS18B PE=1 SV=1	0.0	46.8	53.5	0	1	1	0.0	3.9	3.9
369	P0C0S5	Histone H2A.Z OS=Homo sapiens GN=H2AFZ PE=1 SV=2	0.0	241.6	233.0	0	1	3	0.0	22.7	41.4
370	Q9Y6E2	Basic leucine zipper and W2 domain-containing protein 2 OS=Homo sapiens GN=BZW2 PE=1 SV=1	0.0	65.8	77.1	0	1	2	0.0	1.7	6.2
371	P24534	Elongation factor 1-beta OS=Homo sapiens GN=EEF1B2 PE=1 SV=3	0.0	66.6	67.0	0	1	2	0.0	6.7	10.7
372	Q8IV48	3'-5' exoribonuclease 1 OS=Homo sapiens GN=ERI1 PE=1 SV=3	0.0	69.2	55.9	0	1	1	0.0	4.3	4.3
373	O95758	Polypyrimidine tract-binding protein 3 OS=Homo sapiens GN=PTBP3 PE=1 SV=2	0.0	76.4	131.6	0	1	2	0.0	2.2	5.8
374	Q9Y399	28S ribosomal protein S2, mitochondrial OS=Homo sapiens GN=MRPS2 PE=1 SV=1	0.0	53.4	56.5	0	1	2	0.0	2.7	5.4
375	P61088	Ubiquitin-conjugating enzyme E2 N OS=Homo sapiens GN=UBE2N PE=1 SV=1	0.0	72.6	68.4	0	1	1	0.0	7.2	7.2
376	P61619	Protein transport protein Sec61 subunit alpha isoform 1 OS=Homo sapiens GN=SEC61A1 PE=1 SV=2	0.0	57.3	50.2	0	1	1	0.0	2.3	2.3
377	Q14344	Guanine nucleotide-binding protein subunit alpha-13 OS=Homo sapiens GN=GNA13 PE=1 SV=2	0.0	98.6	63.9	0	1	1	0.0	2.7	2.7
378	P61513	60S ribosomal protein L37a OS=Homo sapiens GN=RPL37A PE=1 SV=2	0.0	108.5	97.3	0	1	1	0.0	19.6	19.6
379	P55735	Protein SEC13 homolog OS=Homo sapiens GN=SEC13 PE=1 SV=3	0.0	54.1	47.2	0	1	1	0.0	3.4	5.3
380	Q96NH3	Protein broad-minded OS=Homo sapiens GN=TBC1D32 PE=2 SV=4	0.0	57.1	60.7	0	1	1	0.0	0.4	0.4

## Sheet: A+B+C
			Mascot Score			No of peptides			Sequence coverage %
Row	Accession	Name	empty vector	Ki67	TRIM	empty vector	Ki67	TRIM	empty vector	Ki67	TRIM
1	P46013	Antigen KI-67 OS=Homo sapiens GN=MKI67 PE=1 SV=2	7320.7	1,3410.6	2024.7	152	250	44	47.6	60.1	16.8
2	Q15149	Plectin OS=Homo sapiens GN=PLEC PE=1 SV=3	3717.5	1,1655.5	1,0646.4	85	228	219	20.0	49.4	46.6
3	Q14204	Cytoplasmic dynein 1 heavy chain 1 OS=Homo sapiens GN=DYNC1H1 PE=1 SV=5	365.0	6059.2	5936.2	10	144	140	1.9	35.1	32.7
4	Q92616	Translational activator GCN1 OS=Homo sapiens GN=GCN1L1 PE=1 SV=6	1658.8	4861.2	4042.0	41	102	86	16.8	40.6	37.4
5	Q9NU22	Midasin OS=Homo sapiens GN=MDN1 PE=1 SV=2	210.7	3587.0	1136.1	3	83	27	0.5	18.7	5.7
6	Q14980	Nuclear mitotic apparatus protein 1 OS=Homo sapiens GN=NUMA1 PE=1 SV=2	1582.5	3769.0	3392.5	36	70	60	21.4	41.4	36.5
7	P04264	Keratin, type II cytoskeletal 1 OS=Homo sapiens GN=KRT1 PE=1 SV=6	4768.8	3965.1	4047.8	77	64	63	76.4	74.8	72.5
8	P35908	Keratin, type II cytoskeletal 2 epidermal OS=Homo sapiens GN=KRT2 PE=1 SV=2	4720.4	3856.6	3816.5	67	60	56	85.8	79.7	77.8
9	P35527	Keratin, type I cytoskeletal 9 OS=Homo sapiens GN=KRT9 PE=1 SV=3	4083.0	3283.2	3340.2	70	60	60	96.3	95.5	94.2
10	P35579	Myosin-9 OS=Homo sapiens GN=MYH9 PE=1 SV=4	2032.6	3036.2	3439.2	47	60	69	29.1	34.0	38.6
11	Q9UPN3	Microtubule-actin cross-linking factor 1, isoforms 1/2/3/5 OS=Homo sapiens GN=MACF1 PE=1 SV=4	123.3	3169.6	1862.8	1	56	41	0.2	10.1	6.9
12	Q14839	Chromodomain-helicase-DNA-binding protein 4 OS=Homo sapiens GN=CHD4 PE=1 SV=2	233.4	2182.7	1730.7	5	54	48	3.0	30.8	27.5
13	Q09666	Neuroblast differentiation-associated protein AHNAK OS=Homo sapiens GN=AHNAK PE=1 SV=2	137.9	2284.1	1152.0	3	52	28	0.6	12.1	5.9
14	Q14008	Cytoskeleton-associated protein 5 OS=Homo sapiens GN=CKAP5 PE=1 SV=3	852.7	2293.2	2553.2	17	52	59	9.4	29.5	35.3
15	P13645	Keratin, type I cytoskeletal 10 OS=Homo sapiens GN=KRT10 PE=1 SV=6	3789.3	3352.0	3206.3	61	51	54	59.1	55.5	54.3
16	Q14669	E3 ubiquitin-protein ligase TRIP12 OS=Homo sapiens GN=TRIP12 PE=1 SV=1	673.3	2213.7	1399.6	13	48	29	8.2	28.6	17.0
17	Q14690	Protein RRP5 homolog OS=Homo sapiens GN=PDCD11 PE=1 SV=3	469.1	2427.9	1113.5	8	46	21	5.9	27.4	14.8
18	P17844	Probable ATP-dependent RNA helicase DDX5 OS=Homo sapiens GN=DDX5 PE=1 SV=1	1159.4	1823.8	1544.6	29	45	38	39.3	52.0	46.1
19	Q9H0A0	N-acetyltransferase 10 OS=Homo sapiens GN=NAT10 PE=1 SV=2	394.0	2044.8	1180.5	9	44	27	10.0	47.3	32.3
20	Q5UIP0	Telomere-associated protein RIF1 OS=Homo sapiens GN=RIF1 PE=1 SV=2	389.1	2171.7	1095.9	9	43	21	4.8	23.9	12.4
21	P60842	Eukaryotic initiation factor 4A-I OS=Homo sapiens GN=EIF4A1 PE=1 SV=1	1214.2	1748.0	1622.4	31	43	43	53.7	70.0	66.7
22	P09874	Poly [ADP-ribose] polymerase 1 OS=Homo sapiens GN=PARP1 PE=1 SV=4	499.0	1740.3	1617.8	10	42	34	13.4	44.4	37.0
23	Q9NR30	Nucleolar RNA helicase 2 OS=Homo sapiens GN=DDX21 PE=1 SV=5	303.2	2371.1	1406.6	8	42	26	12.1	52.7	38.2
24	Q9H583	HEAT repeat-containing protein 1 OS=Homo sapiens GN=HEATR1 PE=1 SV=3	423.4	1912.9	1010.7	9	41	21	5.4	21.7	13.5
25	O14980	Exportin-1 OS=Homo sapiens GN=XPO1 PE=1 SV=1	398.6	1654.8	1125.2	7	41	33	9.6	38.7	31.1
26	P52272	Heterogeneous nuclear ribonucleoprotein M OS=Homo sapiens GN=HNRNPM PE=1 SV=3	151.3	1181.1	626.2	3	40	15	5.5	37.7	21.5
27	P50570	Dynamin-2 OS=Homo sapiens GN=DNM2 PE=1 SV=2	855.1	1793.0	1449.8	20	39	33	25.7	47.6	41.5
28	O00567	Nucleolar protein 56 OS=Homo sapiens GN=NOP56 PE=1 SV=4	143.6	1521.5	580.3	3	38	14	5.4	59.9	26.6
29	Q08211	ATP-dependent RNA helicase A OS=Homo sapiens GN=DHX9 PE=1 SV=4	2435.5	1764.0	2590.4	50	38	55	42.4	31.7	41.0
30	Q14676	Mediator of DNA damage checkpoint protein 1 OS=Homo sapiens GN=MDC1 PE=1 SV=3	349.0	2218.2	1429.9	8	38	26	6.7	35.4	25.8
31	P46087	Putative ribosomal RNA methyltransferase NOP2 OS=Homo sapiens GN=NOP2 PE=1 SV=2	571.1	1834.5	1111.8	11	36	23	16.1	50.2	32.5
32	P13647	Keratin, type II cytoskeletal 5 OS=Homo sapiens GN=KRT5 PE=1 SV=3	2557.0	1839.6	2095.1	47	35	31	48.1	38.1	28.6
33	Q9NVP1	ATP-dependent RNA helicase DDX18 OS=Homo sapiens GN=DDX18 PE=1 SV=2	66.9	1544.8	1116.8	2	34	23	3.1	53.7	42.4
34	Q14684	Ribosomal RNA processing protein 1 homolog B OS=Homo sapiens GN=RRP1B PE=1 SV=3	91.0	1254.8	735.6	3	34	19	4.9	47.0	30.1
35	P11940	Polyadenylate-binding protein 1 OS=Homo sapiens GN=PABPC1 PE=1 SV=2	320.6	1299.7	757.2	8	33	20	13.7	44.0	29.2
36	P43243	Matrin-3 OS=Homo sapiens GN=MATR3 PE=1 SV=2	597.3	1589.0	1262.0	12	33	31	16.4	44.6	36.4
37	P11142	Heat shock cognate 71 kDa protein OS=Homo sapiens GN=HSPA8 PE=1 SV=1	989.3	1637.3	1543.9	22	32	29	35.6	51.9	50.2
38	Q00839	Heterogeneous nuclear ribonucleoprotein U OS=Homo sapiens GN=HNRNPU PE=1 SV=6	516.2	1372.3	1097.7	13	32	23	18.5	33.9	27.2
39	Q9H223	EH domain-containing protein 4 OS=Homo sapiens GN=EHD4 PE=1 SV=1	847.0	1453.3	1120.1	20	32	24	38.8	58.8	45.7
40	P12956	X-ray repair cross-complementing protein 6 OS=Homo sapiens GN=XRCC6 PE=1 SV=2	551.9	1409.6	1011.3	12	31	22	22.3	52.7	40.1
41	Q12906	Interleukin enhancer-binding factor 3 OS=Homo sapiens GN=ILF3 PE=1 SV=3	257.9	1372.7	957.7	6	31	23	7.2	42.8	24.9
42	O43143	Putative pre-mRNA-splicing factor ATP-dependent RNA helicase DHX15 OS=Homo sapiens GN=DHX15 PE=1 SV=2	72.7	1137.6	667.3	2	31	18	2.4	36.7	25.8
43	O00571	ATP-dependent RNA helicase DDX3X OS=Homo sapiens GN=DDX3X PE=1 SV=3	822.8	1665.6	1443.4	15	30	27	27.3	45.8	44.0
44	Q86WJ1	Chromodomain-helicase-DNA-binding protein 1-like OS=Homo sapiens GN=CHD1L PE=1 SV=2	393.9	1411.2	951.1	8	30	23	10.5	39.2	28.8
45	O94776	Metastasis-associated protein MTA2 OS=Homo sapiens GN=MTA2 PE=1 SV=1	124.7	1333.7	925.4	3	30	21	4.9	42.2	31.9
46	Q01780	Exosome component 10 OS=Homo sapiens GN=EXOSC10 PE=1 SV=2	217.1	1299.7	574.1	5	30	16	5.6	33.8	19.2
47	Q14966	Zinc finger protein 638 OS=Homo sapiens GN=ZNF638 PE=1 SV=2	74.0	1382.5	604.9	2	29	12	1.4	20.6	8.6
48	Q99459	Cell division cycle 5-like protein OS=Homo sapiens GN=CDC5L PE=1 SV=2	361.0	1452.7	677.5	10	29	15	16.5	41.6	24.8
49	P78344	Eukaryotic translation initiation factor 4 gamma 2 OS=Homo sapiens GN=EIF4G2 PE=1 SV=1	125.4	1073.8	506.3	3	28	15	3.5	31.8	16.6
50	P49792	E3 SUMO-protein ligase RanBP2 OS=Homo sapiens GN=RANBP2 PE=1 SV=2	86.6	1284.5	535.7	3	28	11	1.2	11.9	4.8
51	P61978	Heterogeneous nuclear ribonucleoprotein K OS=Homo sapiens GN=HNRNPK PE=1 SV=1	910.1	1459.3	1128.6	16	28	21	39.7	58.1	47.3
52	P13010	X-ray repair cross-complementing protein 5 OS=Homo sapiens GN=XRCC5 PE=1 SV=3	180.6	991.2	769.1	4	27	20	7.1	41.3	35.0
53	Q9H6R4	Nucleolar protein 6 OS=Homo sapiens GN=NOL6 PE=1 SV=2	168.8	1040.4	453.7	3	27	9	3.2	26.4	9.8
54	P08670	Vimentin OS=Homo sapiens GN=VIM PE=1 SV=4	1073.4	1207.2	980.7	24	27	23	47.9	58.4	50.0
55	P02533	Keratin, type I cytoskeletal 14 OS=Homo sapiens GN=KRT14 PE=1 SV=4	2850.2	1903.8	2383.2	46	27	23	65.0	51.1	45.3
56	Q12931	Heat shock protein 75 kDa, mitochondrial OS=Homo sapiens GN=TRAP1 PE=1 SV=3	184.4	1338.7	467.5	3	27	9	5.8	44.2	16.6
57	P05783	Keratin, type I cytoskeletal 18 OS=Homo sapiens GN=KRT18 PE=1 SV=2	1152.4	1235.1	1156.0	26	26	29	54.2	50.9	55.3
58	P19338	Nucleolin OS=Homo sapiens GN=NCL PE=1 SV=3	959.2	1758.4	1278.9	16	26	20	25.4	36.3	29.4
59	P10809	60 kDa heat shock protein, mitochondrial OS=Homo sapiens GN=HSPD1 PE=1 SV=2	200.0	1202.2	182.0	4	26	3	10.8	46.9	8.7
60	P38919	Eukaryotic initiation factor 4A-III OS=Homo sapiens GN=EIF4A3 PE=1 SV=4	736.3	1147.8	1232.2	18	26	29	36.7	45.3	47.2
61	P11021	78 kDa glucose-regulated protein OS=Homo sapiens GN=HSPA5 PE=1 SV=2	389.0	1414.3	959.4	6	25	18	13.1	45.1	35.6
62	P46777	60S ribosomal protein L5 OS=Homo sapiens GN=RPL5 PE=1 SV=3	221.4	724.4	497.7	7	25	16	16.2	50.2	32.3
63	Q9UKN8	General transcription factor 3C polypeptide 4 OS=Homo sapiens GN=GTF3C4 PE=1 SV=2	103.7	931.1	506.8	2	25	10	3.4	34.3	13.4
64	Q04637	Eukaryotic translation initiation factor 4 gamma 1 OS=Homo sapiens GN=EIF4G1 PE=1 SV=4	244.7	1188.2	970.8	6	25	21	4.3	19.1	14.3
65	P21333	Filamin-A OS=Homo sapiens GN=FLNA PE=1 SV=4	398.4	1270.3	1482.2	8	25	29	4.6	15.0	16.3
66	Q9Y5Q9	General transcription factor 3C polypeptide 3 OS=Homo sapiens GN=GTF3C3 PE=1 SV=1	255.2	1309.1	817.2	7	25	18	7.3	35.4	23.8
67	O43390	Heterogeneous nuclear ribonucleoprotein R OS=Homo sapiens GN=HNRNPR PE=1 SV=1	339.2	1235.8	564.8	8	25	13	14.7	40.4	22.1
68	Q01082	Spectrin beta chain, non-erythrocytic 1 OS=Homo sapiens GN=SPTBN1 PE=1 SV=2	395.2	1151.1	1457.5	9	24	31	4.1	11.7	14.3
69	Q7Z2W4	Zinc finger CCCH-type antiviral protein 1 OS=Homo sapiens GN=ZC3HAV1 PE=1 SV=3	234.8	1212.1	417.9	5	24	8	7.9	32.9	11.9
70	P11388	DNA topoisomerase 2-alpha OS=Homo sapiens GN=TOP2A PE=1 SV=3	3469.4	920.2	3946.1	86	24	95	46.0	17.3	46.4
71	P49916	DNA ligase 3 OS=Homo sapiens GN=LIG3 PE=1 SV=2	538.0	1126.0	605.2	10	24	13	10.9	28.9	13.5
72	O60264	SWI/SNF-related matrix-associated actin-dependent regulator of chromatin subfamily A member 5 OS=Homo sapiens GN=SMARCA5 PE=1 SV=1	1051.4	1185.9	1553.1	25	24	42	21.3	21.3	33.6
73	O60287	Nucleolar pre-ribosomal-associated protein 1 OS=Homo sapiens GN=URB1 PE=1 SV=4	152.0	1091.9	502.1	3	24	13	1.4	12.5	6.3
74	Q86YP4	Transcriptional repressor p66-alpha OS=Homo sapiens GN=GATAD2A PE=1 SV=1	117.3	1085.7	340.9	1	24	7	1.9	46.9	13.1
75	Q8NB90	Spermatogenesis-associated protein 5 OS=Homo sapiens GN=SPATA5 PE=1 SV=3	196.7	1066.6	322.2	4	24	10	5.8	34.8	15.0
76	P48681	Nestin OS=Homo sapiens GN=NES PE=1 SV=2	163.9	1317.8	1079.7	4	24	20	2.5	21.6	16.3
77	Q7L2E3	Putative ATP-dependent RNA helicase DHX30 OS=Homo sapiens GN=DHX30 PE=1 SV=1	106.5	951.9	612.5	3	23	15	2.3	19.2	14.8
78	P14866	Heterogeneous nuclear ribonucleoprotein L OS=Homo sapiens GN=HNRNPL PE=1 SV=2	385.4	1043.2	563.0	8	23	14	21.1	44.5	28.2
79	Q96A65	Exocyst complex component 4 OS=Homo sapiens GN=EXOC4 PE=1 SV=1	366.2	1017.4	951.7	7	23	18	9.5	29.5	24.3
80	Q9Y3T9	Nucleolar complex protein 2 homolog OS=Homo sapiens GN=NOC2L PE=1 SV=4	75.4	792.3	410.7	2	22	11	2.8	23.2	14.6
81	P27694	Replication protein A 70 kDa DNA-binding subunit OS=Homo sapiens GN=RPA1 PE=1 SV=2	143.1	1053.1	618.9	3	22	16	7.5	38.8	28.4
82	Q14315	Filamin-C OS=Homo sapiens GN=FLNC PE=1 SV=3	68.3	1128.0	779.2	1	22	17	0.3	11.6	8.8
83	Q92974	Rho guanine nucleotide exchange factor 2 OS=Homo sapiens GN=ARHGEF2 PE=1 SV=4	120.0	1043.3	598.1	3	22	13	3.1	25.1	16.1
84	P40692	DNA mismatch repair protein Mlh1 OS=Homo sapiens GN=MLH1 PE=1 SV=1	64.1	921.8	554.6	1	22	12	1.6	33.2	21.6
85	P42166	Lamina-associated polypeptide 2, isoform alpha OS=Homo sapiens GN=TMPO PE=1 SV=2	228.2	1174.0	677.1	4	21	15	7.2	45.4	31.7
86	P08238	Heat shock protein HSP 90-beta OS=Homo sapiens GN=HSP90AB1 PE=1 SV=4	123.9	1041.4	626.8	2	21	15	2.3	34.7	22.4
87	P60709	Actin, cytoplasmic 1 OS=Homo sapiens GN=ACTB PE=1 SV=1	1107.6	1092.8	1171.2	23	21	26	62.7	64.3	64.5
88	P46060	Ran GTPase-activating protein 1 OS=Homo sapiens GN=RANGAP1 PE=1 SV=1	266.2	946.2	659.4	5	20	14	10.1	37.0	24.9
89	P11387	DNA topoisomerase 1 OS=Homo sapiens GN=TOP1 PE=1 SV=2	106.0	800.9	298.1	3	20	8	3.5	20.7	9.8
90	P05388	60S acidic ribosomal protein P0 OS=Homo sapiens GN=RPLP0 PE=1 SV=1	587.8	1025.1	738.4	11	20	15	43.8	58.0	48.3
91	P23396	40S ribosomal protein S3 OS=Homo sapiens GN=RPS3 PE=1 SV=2	595.4	908.8	957.4	15	20	22	64.2	68.7	68.7
92	P39023	60S ribosomal protein L3 OS=Homo sapiens GN=RPL3 PE=1 SV=2	176.5	910.1	589.7	2	20	13	4.7	39.2	28.0
93	Q14974	Importin subunit beta-1 OS=Homo sapiens GN=KPNB1 PE=1 SV=2	109.1	930.6	810.2	3	20	23	4.9	27.5	29.1
94	P49756	RNA-binding protein 25 OS=Homo sapiens GN=RBM25 PE=1 SV=3	68.6	870.3	479.0	3	20	13	4.6	24.3	14.5
95	P35580	Myosin-10 OS=Homo sapiens GN=MYH10 PE=1 SV=3	504.1	1012.6	1231.9	6	19	20	3.2	11.5	14.6
96	O75146	Huntingtin-interacting protein 1-related protein OS=Homo sapiens GN=HIP1R PE=1 SV=2	69.6	825.8	555.1	2	19	14	2.0	25.3	16.4
97	P06748	Nucleophosmin OS=Homo sapiens GN=NPM1 PE=1 SV=2	633.5	1170.3	829.9	13	19	15	53.7	58.5	56.5
98	Q96T37	Putative RNA-binding protein 15 OS=Homo sapiens GN=RBM15 PE=1 SV=2	73.8	915.8	612.4	1	19	12	0.8	24.6	15.1
99	Q96PK6	RNA-binding protein 14 OS=Homo sapiens GN=RBM14 PE=1 SV=2	217.0	809.2	575.5	7	18	10	14.1	28.7	17.0
100	Q9H0S4	Probable ATP-dependent RNA helicase DDX47 OS=Homo sapiens GN=DDX47 PE=1 SV=1	293.3	822.5	954.0	8	18	21	21.3	34.5	40.7
101	Q07666	KH domain-containing, RNA-binding, signal transduction-associated protein 1 OS=Homo sapiens GN=KHDRBS1 PE=1 SV=1	356.5	702.8	585.6	11	18	13	26.6	31.4	30.5
102	Q9HCM9	E3 ubiquitin-protein ligase TRIM39 OS=Homo sapiens GN=TRIM39 PE=1 SV=2	356.4	736.9	2034.0	8	18	36	15.6	40.5	53.1
103	P48668	Keratin, type II cytoskeletal 6C OS=Homo sapiens GN=KRT6C PE=1 SV=3	2335.4	1821.2	2268.5	21	18	31	30.1	28.0	42.0
104	Q9Y4W2	Ribosomal biogenesis protein LAS1L OS=Homo sapiens GN=LAS1L PE=1 SV=2	51.9	855.0	538.1	1	18	14	1.9	29.6	23.2
105	P09651	Heterogeneous nuclear ribonucleoprotein A1 OS=Homo sapiens GN=HNRNPA1 PE=1 SV=5	478.4	940.6	687.9	8	17	11	17.7	41.9	27.2
106	Q9NZN4	EH domain-containing protein 2 OS=Homo sapiens GN=EHD2 PE=1 SV=2	79.7	763.0	320.7	2	17	9	2.4	34.3	17.9
107	Q9NRZ9	Lymphoid-specific helicase OS=Homo sapiens GN=HELLS PE=1 SV=1	111.3	648.6	391.8	3	17	11	3.8	20.5	12.1
108	P40937	Replication factor C subunit 5 OS=Homo sapiens GN=RFC5 PE=1 SV=1	523.3	740.8	832.7	13	17	17	40.6	47.4	52.1
109	Q15269	Periodic tryptophan protein 2 homolog OS=Homo sapiens GN=PWP2 PE=1 SV=2	113.3	649.0	272.4	2	17	7	2.9	21.8	9.7
110	P07437	Tubulin beta chain OS=Homo sapiens GN=TUBB PE=1 SV=2	449.9	693.2	800.2	10	17	7	24.5	33.8	14.6
111	Q15365	Poly(rC)-binding protein 1 OS=Homo sapiens GN=PCBP1 PE=1 SV=2	598.0	780.4	828.5	12	17	18	43.0	50.0	52.2
112	P22626	Heterogeneous nuclear ribonucleoproteins A2/B1 OS=Homo sapiens GN=HNRNPA2B1 PE=1 SV=2	483.9	965.8	818.2	12	17	19	36.5	43.1	51.8
113	Q5VTE0	Putative elongation factor 1-alpha-like 3 OS=Homo sapiens GN=EEF1A1P5 PE=5 SV=1	367.4	603.9	539.5	9	17	17	25.5	36.8	35.5
114	Q9H6R0	Putative ATP-dependent RNA helicase DHX33 OS=Homo sapiens GN=DHX33 PE=1 SV=2	85.0	743.4	495.4	1	17	9	1.4	24.5	12.3
115	Q92841	Probable ATP-dependent RNA helicase DDX17 OS=Homo sapiens GN=DDX17 PE=1 SV=2	609.5	1300.2	1132.8	4	17	13	6.7	24.6	18.9
116	Q9Y5Q8	General transcription factor 3C polypeptide 5 OS=Homo sapiens GN=GTF3C5 PE=1 SV=2	125.5	609.6	176.4	3	17	6	5.8	30.6	11.4
117	P02545	Prelamin-A/C OS=Homo sapiens GN=LMNA PE=1 SV=1	199.3	895.6	593.3	4	16	12	7.2	28.3	22.6
118	Q9BZZ5	Apoptosis inhibitor 5 OS=Homo sapiens GN=API5 PE=1 SV=3	169.6	875.5	352.7	5	16	8	10.7	35.9	20.8
119	P18124	60S ribosomal protein L7 OS=Homo sapiens GN=RPL7 PE=1 SV=1	261.0	727.1	443.4	7	16	11	27.0	54.8	40.7
120	P35221	Catenin alpha-1 OS=Homo sapiens GN=CTNNA1 PE=1 SV=1	57.7	688.0	301.2	2	16	6	2.4	25.7	11.0
121	P51659	Peroxisomal multifunctional enzyme type 2 OS=Homo sapiens GN=HSD17B4 PE=1 SV=3	185.2	967.3	652.0	5	16	12	8.4	31.7	23.6
122	P61247	40S ribosomal protein S3a OS=Homo sapiens GN=RPS3A PE=1 SV=2	197.0	682.3	414.1	7	16	11	21.6	45.8	34.1
123	P60228	Eukaryotic translation initiation factor 3 subunit E OS=Homo sapiens GN=EIF3E PE=1 SV=1	74.6	456.3	637.3	2	16	14	4.0	38.4	38.2
124	Q9H8H0	Nucleolar protein 11 OS=Homo sapiens GN=NOL11 PE=1 SV=1	116.7	897.0	676.3	3	16	13	5.4	26.0	21.8
125	P98175	RNA-binding protein 10 OS=Homo sapiens GN=RBM10 PE=1 SV=3	727.0	701.9	556.6	14	15	12	17.4	23.7	15.4
126	P38159	RNA-binding motif protein, X chromosome OS=Homo sapiens GN=RBMX PE=1 SV=3	324.8	565.9	464.5	6	15	11	18.9	26.3	23.5
127	Q15393	Splicing factor 3B subunit 3 OS=Homo sapiens GN=SF3B3 PE=1 SV=4	176.7	755.7	342.4	3	15	7	2.8	16.9	7.2
128	P08779	Keratin, type I cytoskeletal 16 OS=Homo sapiens GN=KRT16 PE=1 SV=4	2437.2	1680.2	2459.3	24	15	42	49.5	32.8	60.9
129	P29508	Serpin B3 OS=Homo sapiens GN=SERPINB3 PE=1 SV=2	514.4	715.9	59.4	11	15	1	35.1	40.8	2.3
130	O60506	Heterogeneous nuclear ribonucleoprotein Q OS=Homo sapiens GN=SYNCRIP PE=1 SV=2	155.6	857.3	430.8	1	15	5	2.1	31.0	11.1
131	P35250	Replication factor C subunit 2 OS=Homo sapiens GN=RFC2 PE=1 SV=3	556.6	740.8	663.8	12	15	16	40.7	45.8	47.5
132	Q13813	Spectrin alpha chain, non-erythrocytic 1 OS=Homo sapiens GN=SPTAN1 PE=1 SV=3	86.7	613.6	352.1	2	15	6	0.9	8.3	3.0
133	Q13838	Spliceosome RNA helicase DDX39B OS=Homo sapiens GN=DDX39B PE=1 SV=1	401.1	573.1	654.4	1	15	13	4.4	27.6	29.4
134	Q9H9A6	Leucine-rich repeat-containing protein 40 OS=Homo sapiens GN=LRRC40 PE=1 SV=1	310.8	655.5	372.5	8	15	11	14.6	26.7	18.6
135	Q96CW5	Gamma-tubulin complex component 3 OS=Homo sapiens GN=TUBGCP3 PE=1 SV=2	119.2	725.5	516.1	2	14	10	3.0	20.1	15.9
136	Q13547	Histone deacetylase 1 OS=Homo sapiens GN=HDAC1 PE=1 SV=1	240.8	454.5	217.4	5	14	4	12.2	30.5	9.5
137	O00159	Unconventional myosin-Ic OS=Homo sapiens GN=MYO1C PE=1 SV=4	508.7	421.3	762.4	12	14	18	12.5	14.1	17.1
138	Q9UHB9	Signal recognition particle subunit SRP68 OS=Homo sapiens GN=SRP68 PE=1 SV=2	77.3	723.8	375.2	2	14	8	3.5	27.9	15.9
139	P57678	Gem-associated protein 4 OS=Homo sapiens GN=GEMIN4 PE=1 SV=2	327.9	742.3	543.5	7	14	10	7.4	17.3	12.1
140	Q969X6	Cirhin OS=Homo sapiens GN=CIRH1A PE=1 SV=1	228.7	668.5	433.9	5	14	11	9.2	24.1	17.2
141	Q49A26	Putative oxidoreductase GLYR1 OS=Homo sapiens GN=GLYR1 PE=1 SV=3	198.1	635.4	170.0	5	14	4	11.6	28.0	11.9
142	O43837	Isocitrate dehydrogenase [NAD] subunit beta, mitochondrial OS=Homo sapiens GN=IDH3B PE=1 SV=2	185.2	410.6	183.7	6	14	5	15.3	27.5	15.1
143	P43246	DNA mismatch repair protein Msh2 OS=Homo sapiens GN=MSH2 PE=1 SV=1	50.7	645.6	509.5	1	14	12	0.7	20.1	14.7
144	Q13415	Origin recognition complex subunit 1 OS=Homo sapiens GN=ORC1 PE=1 SV=2	131.6	732.9	230.4	4	14	4	4.6	19.3	5.6
145	P22087	rRNA 2'-O-methyltransferase fibrillarin OS=Homo sapiens GN=FBL PE=1 SV=2	282.7	702.3	407.8	6	14	8	24.9	58.3	27.4
146	Q96KR1	Zinc finger RNA-binding protein OS=Homo sapiens GN=ZFR PE=1 SV=2	316.7	616.7	610.2	5	13	10	6.1	19.2	11.7
147	P12814	Alpha-actinin-1 OS=Homo sapiens GN=ACTN1 PE=1 SV=2	91.4	501.6	354.4	2	13	6	2.9	17.4	8.7
148	Q8WXI9	Transcriptional repressor p66-beta OS=Homo sapiens GN=GATAD2B PE=1 SV=1	193.9	636.2	384.5	3	13	7	5.9	32.9	17.0
149	Q9Y230	RuvB-like 2 OS=Homo sapiens GN=RUVBL2 PE=1 SV=3	699.1	585.6	795.2	13	13	15	26.3	30.5	37.4
150	P30260	Cell division cycle protein 27 homolog OS=Homo sapiens GN=CDC27 PE=1 SV=2	78.3	579.7	397.6	1	13	9	0.7	21.5	16.1
151	P08107	Heat shock 70 kDa protein 1A/1B OS=Homo sapiens GN=HSPA1A PE=1 SV=5	310.3	744.8	707.1	4	13	15	9.2	30.1	28.9
152	Q96KP1	Exocyst complex component 2 OS=Homo sapiens GN=EXOC2 PE=1 SV=1	274.9	620.6	568.0	6	13	11	6.7	16.1	12.9
153	P07910	Heterogeneous nuclear ribonucleoproteins C1/C2 OS=Homo sapiens GN=HNRNPC PE=1 SV=4	530.0	720.1	610.6	11	13	12	28.8	43.1	38.9
154	P53618	Coatomer subunit beta OS=Homo sapiens GN=COPB1 PE=1 SV=3	61.3	520.4	100.6	1	13	2	1.0	14.2	2.2
155	P62701	40S ribosomal protein S4, X isoform OS=Homo sapiens GN=RPS4X PE=1 SV=2	288.5	623.7	551.2	6	13	13	21.7	40.7	45.6
156	P20700	Lamin-B1 OS=Homo sapiens GN=LMNB1 PE=1 SV=2	474.1	606.4	526.7	11	13	10	17.9	23.2	20.6
157	P15924	Desmoplakin OS=Homo sapiens GN=DSP PE=1 SV=3	2312.1	548.4	1498.2	52	13	40	19.3	4.9	14.2
158	Q7L014	Probable ATP-dependent RNA helicase DDX46 OS=Homo sapiens GN=DDX46 PE=1 SV=2	108.9	505.0	591.6	3	12	14	2.6	14.4	15.2
159	Q9UHI6	Probable ATP-dependent RNA helicase DDX20 OS=Homo sapiens GN=DDX20 PE=1 SV=2	224.7	525.1	229.8	6	12	5	8.6	21.5	8.1
160	Q9BSJ2	Gamma-tubulin complex component 2 OS=Homo sapiens GN=TUBGCP2 PE=1 SV=2	114.3	520.6	383.9	3	12	10	3.5	15.4	12.2
161	Q9UHX1	Poly(U)-binding-splicing factor PUF60 OS=Homo sapiens GN=PUF60 PE=1 SV=1	155.0	541.4	83.7	3	12	3	5.7	34.0	5.7
162	Q15717	ELAV-like protein 1 OS=Homo sapiens GN=ELAVL1 PE=1 SV=2	505.0	579.0	641.8	11	12	14	42.6	39.9	43.3
163	Q05193	Dynamin-1 OS=Homo sapiens GN=DNM1 PE=1 SV=2	437.7	1117.8	861.7	4	12	9	8.1	18.1	14.4
164	Q9NXV6	CDKN2A-interacting protein OS=Homo sapiens GN=CDKN2AIP PE=1 SV=3	91.9	704.9	395.2	2	12	6	4.1	29.1	16.6
165	O96019	Actin-like protein 6A OS=Homo sapiens GN=ACTL6A PE=1 SV=1	251.7	441.0	375.5	8	12	10	17.7	24.0	21.2
166	P62753	40S ribosomal protein S6 OS=Homo sapiens GN=RPS6 PE=1 SV=1	98.2	623.7	454.9	2	12	8	8.0	26.1	25.3
167	P05387	60S acidic ribosomal protein P2 OS=Homo sapiens GN=RPLP2 PE=1 SV=1	246.6	762.2	407.0	4	12	6	69.6	90.4	73.0
168	Q13416	Origin recognition complex subunit 2 OS=Homo sapiens GN=ORC2 PE=1 SV=2	70.8	457.9	212.8	2	11	5	4.2	21.8	11.1
169	O94906	Pre-mRNA-processing factor 6 OS=Homo sapiens GN=PRPF6 PE=1 SV=1	116.2	536.7	581.2	2	11	12	2.2	14.0	14.5
170	P62750	60S ribosomal protein L23a OS=Homo sapiens GN=RPL23A PE=1 SV=1	188.6	513.5	321.8	3	11	7	21.8	42.9	28.2
171	Q9Y6M1	Insulin-like growth factor 2 mRNA-binding protein 2 OS=Homo sapiens GN=IGF2BP2 PE=1 SV=2	76.5	641.4	540.9	2	11	8	4.8	23.5	19.7
172	P51991	Heterogeneous nuclear ribonucleoprotein A3 OS=Homo sapiens GN=HNRNPA3 PE=1 SV=2	380.1	684.5	620.9	8	11	10	24.1	28.6	28.3
173	P67809	Nuclease-sensitive element-binding protein 1 OS=Homo sapiens GN=YBX1 PE=1 SV=3	425.6	684.4	634.5	7	11	10	40.7	53.7	50.0
174	Q07955	Serine/arginine-rich splicing factor 1 OS=Homo sapiens GN=SRSF1 PE=1 SV=2	51.2	496.4	287.8	1	11	6	4.0	43.1	28.2
175	O43615	Mitochondrial import inner membrane translocase subunit TIM44 OS=Homo sapiens GN=TIMM44 PE=1 SV=2	70.0	504.4	403.3	2	11	9	5.5	25.9	23.7
176	Q9Y295	Developmentally-regulated GTP-binding protein 1 OS=Homo sapiens GN=DRG1 PE=1 SV=1	150.5	545.1	540.7	4	11	11	14.2	38.1	35.1
177	P62269	40S ribosomal protein S18 OS=Homo sapiens GN=RPS18 PE=1 SV=3	58.4	535.5	480.2	2	11	10	13.8	48.0	48.0
178	Q9Y2W1	Thyroid hormone receptor-associated protein 3 OS=Homo sapiens GN=THRAP3 PE=1 SV=2	847.4	438.7	742.7	16	11	16	16.8	9.7	19.3
179	Q12905	Interleukin enhancer-binding factor 2 OS=Homo sapiens GN=ILF2 PE=1 SV=2	274.4	695.4	667.1	6	11	10	21.8	46.7	43.8
180	P10412	Histone H1.4 OS=Homo sapiens GN=HIST1H1E PE=1 SV=2	285.9	610.0	464.9	6	11	8	22.8	36.1	24.7
181	Q9UFC0	Leucine-rich repeat and WD repeat-containing protein 1 OS=Homo sapiens GN=LRWD1 PE=1 SV=2	76.2	534.6	188.7	3	11	6	5.1	19.3	10.2
182	P62263	40S ribosomal protein S14 OS=Homo sapiens GN=RPS14 PE=1 SV=3	183.4	509.1	416.8	3	11	8	29.8	39.7	38.4
183	P46778	60S ribosomal protein L21 OS=Homo sapiens GN=RPL21 PE=1 SV=2	84.2	444.9	336.3	4	11	7	22.5	38.8	32.5
184	P62280	40S ribosomal protein S11 OS=Homo sapiens GN=RPS11 PE=1 SV=3	271.1	536.0	381.6	7	11	9	28.5	51.3	46.8
185	Q13310	Polyadenylate-binding protein 4 OS=Homo sapiens GN=PABPC4 PE=1 SV=1	143.2	950.2	485.3	2	11	6	3.7	19.4	10.7
186	Q7Z794	Keratin, type II cytoskeletal 1b OS=Homo sapiens GN=KRT77 PE=2 SV=3	877.8	691.3	669.6	15	11	13	24.4	20.6	21.5
187	P52948	Nuclear pore complex protein Nup98-Nup96 OS=Homo sapiens GN=NUP98 PE=1 SV=4	83.2	461.9	134.0	2	11	4	0.9	6.3	2.3
188	P18621	60S ribosomal protein L17 OS=Homo sapiens GN=RPL17 PE=1 SV=3	73.6	479.5	372.3	2	11	8	13.0	50.5	42.4
189	P28370	Probable global transcription activator SNF2L1 OS=Homo sapiens GN=SMARCA1 PE=1 SV=2	461.3	975.0	1128.0	2	11	14	2.4	10.7	13.0
190	Q99623	Prohibitin-2 OS=Homo sapiens GN=PHB2 PE=1 SV=2	179.1	431.0	256.2	5	10	5	17.4	36.5	16.4
191	P62244	40S ribosomal protein S15a OS=Homo sapiens GN=RPS15A PE=1 SV=2	76.9	359.2	360.5	2	10	10	11.5	59.2	63.8
192	P07355	Annexin A2 OS=Homo sapiens GN=ANXA2 PE=1 SV=2	691.0	417.6	255.6	14	10	7	40.1	27.7	23.9
193	Q9NV70	Exocyst complex component 1 OS=Homo sapiens GN=EXOC1 PE=1 SV=4	95.5	421.4	291.3	2	10	6	2.2	13.3	8.3
194	Q02241	Kinesin-like protein KIF23 OS=Homo sapiens GN=KIF23 PE=1 SV=3	79.6	549.2	234.6	2	10	5	2.7	13.9	7.2
195	Q9NUQ6	SPATS2-like protein OS=Homo sapiens GN=SPATS2L PE=1 SV=2	47.8	440.8	106.6	1	10	2	3.0	20.1	6.1
196	Q14978	Nucleolar and coiled-body phosphoprotein 1 OS=Homo sapiens GN=NOLC1 PE=1 SV=2	259.1	443.2	324.7	7	10	7	12.4	16.7	13.4
197	P62249	40S ribosomal protein S16 OS=Homo sapiens GN=RPS16 PE=1 SV=2	120.7	386.0	326.6	3	10	8	19.9	54.1	48.6
198	P35249	Replication factor C subunit 4 OS=Homo sapiens GN=RFC4 PE=1 SV=2	320.3	632.4	587.5	7	10	11	19.8	35.5	33.3
199	Q02413	Desmoglein-1 OS=Homo sapiens GN=DSG1 PE=1 SV=2	1246.2	371.2	362.4	27	10	7	28.8	12.3	9.5
200	P60660	Myosin light polypeptide 6 OS=Homo sapiens GN=MYL6 PE=1 SV=2	162.7	343.4	327.9	5	10	9	35.1	51.0	45.0
201	P57740	Nuclear pore complex protein Nup107 OS=Homo sapiens GN=NUP107 PE=1 SV=1	118.8	365.2	276.6	2	9	7	2.1	11.2	10.2
202	Q01085	Nucleolysin TIAR OS=Homo sapiens GN=TIAL1 PE=1 SV=1	96.0	387.9	333.2	1	9	8	2.9	28.5	23.5
203	Q9UNQ2	Probable dimethyladenosine transferase OS=Homo sapiens GN=DIMT1 PE=1 SV=1	76.9	326.1	371.4	1	9	9	3.2	33.5	28.8
204	Q9BQE3	Tubulin alpha-1C chain OS=Homo sapiens GN=TUBA1C PE=1 SV=1	419.2	576.1	611.6	8	9	10	27.4	30.1	33.2
205	P40938	Replication factor C subunit 3 OS=Homo sapiens GN=RFC3 PE=1 SV=2	261.9	387.5	490.7	4	9	11	13.8	27.0	36.5
206	P62888	60S ribosomal protein L30 OS=Homo sapiens GN=RPL30 PE=1 SV=2	162.9	387.4	338.5	3	9	7	33.9	61.7	56.5
207	P32322	Pyrroline-5-carboxylate reductase 1, mitochondrial OS=Homo sapiens GN=PYCR1 PE=1 SV=2	65.3	422.4	323.8	2	9	7	9.1	29.5	31.7
208	P62805	Histone H4 OS=Homo sapiens GN=HIST1H4A PE=1 SV=2	271.8	402.4	412.9	6	9	10	47.6	47.6	49.5
209	P0CW22	40S ribosomal protein S17-like OS=Homo sapiens GN=RPS17L PE=1 SV=1	103.1	466.7	349.6	3	9	8	23.7	52.6	52.6
210	Q9Y2R4	Probable ATP-dependent RNA helicase DDX52 OS=Homo sapiens GN=DDX52 PE=1 SV=3	57.3	516.7	222.1	1	9	6	2.0	20.5	14.9
211	Q15459	Splicing factor 3A subunit 1 OS=Homo sapiens GN=SF3A1 PE=1 SV=1	65.2	341.3	141.4	2	9	2	2.4	16.8	2.4
212	Q04695	Keratin, type I cytoskeletal 17 OS=Homo sapiens GN=KRT17 PE=1 SV=2	1789.5	1110.1	1610.7	16	9	12	40.5	26.4	33.3
213	P53814	Smoothelin OS=Homo sapiens GN=SMTN PE=1 SV=7	73.0	366.7	165.7	3	9	6	1.9	13.3	7.6
214	O75533	Splicing factor 3B subunit 1 OS=Homo sapiens GN=SF3B1 PE=1 SV=3	1105.4	338.4	940.5	25	9	21	27.5	9.6	23.5
215	Q9Y2A7	Nck-associated protein 1 OS=Homo sapiens GN=NCKAP1 PE=1 SV=1	59.4	337.3	422.4	2	8	9	1.7	8.7	8.6
216	Q02543	60S ribosomal protein L18a OS=Homo sapiens GN=RPL18A PE=1 SV=2	102.0	393.4	291.4	1	8	6	4.5	38.1	29.0
217	O60216	Double-strand-break repair protein rad21 homolog OS=Homo sapiens GN=RAD21 PE=1 SV=2	59.8	429.4	198.0	2	8	5	3.6	18.7	7.3
218	Q8WVV9	Heterogeneous nuclear ribonucleoprotein L-like OS=Homo sapiens GN=HNRNPLL PE=1 SV=1	55.0	325.6	68.2	1	8	1	1.8	23.4	1.8
219	Q29RF7	Sister chromatid cohesion protein PDS5 homolog A OS=Homo sapiens GN=PDS5A PE=1 SV=1	1074.8	489.4	1347.7	19	8	23	18.4	7.9	20.0
220	O95983	Methyl-CpG-binding domain protein 3 OS=Homo sapiens GN=MBD3 PE=1 SV=1	105.4	348.8	177.0	2	8	3	9.3	21.3	12.7
221	Q04837	Single-stranded DNA-binding protein, mitochondrial OS=Homo sapiens GN=SSBP1 PE=1 SV=1	96.0	320.4	220.7	1	8	4	10.1	47.3	38.5
222	Q9NVD7	Alpha-parvin OS=Homo sapiens GN=PARVA PE=1 SV=1	335.0	434.9	449.8	6	8	8	20.2	24.7	25.0
223	P39748	Flap endonuclease 1 OS=Homo sapiens GN=FEN1 PE=1 SV=1	138.2	444.7	404.1	2	8	6	7.1	28.7	18.2
224	P61353	60S ribosomal protein L27 OS=Homo sapiens GN=RPL27 PE=1 SV=2	247.6	376.6	319.4	7	8	8	43.4	47.1	47.1
225	P26641	Elongation factor 1-gamma OS=Homo sapiens GN=EEF1G PE=1 SV=3	91.8	410.6	340.0	2	8	7	4.3	20.4	13.7
226	Q8WUM0	Nuclear pore complex protein Nup133 OS=Homo sapiens GN=NUP133 PE=1 SV=2	154.4	340.6	421.9	4	8	11	3.9	9.1	12.2
227	Q9Y221	60S ribosome subunit biogenesis protein NIP7 homolog OS=Homo sapiens GN=NIP7 PE=1 SV=1	65.3	308.7	145.7	2	8	4	13.3	50.6	28.9
228	P05787	Keratin, type II cytoskeletal 8 OS=Homo sapiens GN=KRT8 PE=1 SV=7	980.6	735.0	698.2	13	8	6	25.7	16.6	14.3
229	Q14103	Heterogeneous nuclear ribonucleoprotein D0 OS=Homo sapiens GN=HNRNPD PE=1 SV=1	89.4	357.5	240.5	2	8	4	5.9	19.4	11.3
230	Q9BTC8	Metastasis-associated protein MTA3 OS=Homo sapiens GN=MTA3 PE=1 SV=2	92.6	546.7	194.8	1	8	2	1.9	12.0	3.9
231	P62829	60S ribosomal protein L23 OS=Homo sapiens GN=RPL23 PE=1 SV=1	182.9	336.4	303.5	6	8	7	31.4	50.7	44.3
232	Q15003	Condensin complex subunit 2 OS=Homo sapiens GN=NCAPH PE=1 SV=3	86.1	364.7	228.2	2	8	5	3.0	12.7	7.4
233	P18077	60S ribosomal protein L35a OS=Homo sapiens GN=RPL35A PE=1 SV=2	104.4	254.4	198.2	4	8	6	20.9	23.6	22.7
234	P35251	Replication factor C subunit 1 OS=Homo sapiens GN=RFC1 PE=1 SV=4	1030.6	249.9	1051.4	24	7	21	22.6	8.1	19.4
235	Q5BKZ1	DBIRD complex subunit ZNF326 OS=Homo sapiens GN=ZNF326 PE=1 SV=2	54.5	365.5	304.7	1	7	7	2.7	11.9	11.9
236	Q07065	Cytoskeleton-associated protein 4 OS=Homo sapiens GN=CKAP4 PE=1 SV=2	75.8	360.0	203.0	1	7	3	3.2	15.1	7.6
237	Q08188	Protein-glutamine gamma-glutamyltransferase E OS=Homo sapiens GN=TGM3 PE=1 SV=4	900.0	282.8	287.4	17	7	8	35.1	13.7	15.3
238	Q86YZ3	Hornerin OS=Homo sapiens GN=HRNR PE=1 SV=2	841.0	343.7	614.0	18	7	13	12.7	5.3	9.1
239	Q9UKM9	RNA-binding protein Raly OS=Homo sapiens GN=RALY PE=1 SV=1	97.1	282.9	203.3	2	7	5	6.2	23.9	14.4
240	P30050	60S ribosomal protein L12 OS=Homo sapiens GN=RPL12 PE=1 SV=1	342.2	503.8	441.5	7	7	6	60.0	60.0	54.5
241	P62899	60S ribosomal protein L31 OS=Homo sapiens GN=RPL31 PE=1 SV=1	112.6	394.5	285.4	2	7	5	18.4	48.0	40.8
242	P52597	Heterogeneous nuclear ribonucleoprotein F OS=Homo sapiens GN=HNRNPF PE=1 SV=3	273.4	510.4	501.6	6	7	8	19.8	26.5	28.2
243	Q9NYF8	Bcl-2-associated transcription factor 1 OS=Homo sapiens GN=BCLAF1 PE=1 SV=2	646.7	331.8	660.4	16	7	15	20.3	8.2	20.5
244	O43929	Origin recognition complex subunit 4 OS=Homo sapiens GN=ORC4 PE=1 SV=2	54.5	392.3	383.1	2	7	7	4.6	15.6	15.8
245	Q15366	Poly(rC)-binding protein 2 OS=Homo sapiens GN=PCBP2 PE=1 SV=1	374.6	525.5	540.9	3	7	6	10.4	28.8	28.8
246	P84095	Rho-related GTP-binding protein RhoG OS=Homo sapiens GN=RHOG PE=1 SV=1	93.7	348.0	325.7	3	7	7	23.0	45.0	38.2
247	P31944	Caspase-14 OS=Homo sapiens GN=CASP14 PE=1 SV=2	455.2	276.9	202.7	10	7	5	35.5	26.0	19.8
248	P62277	40S ribosomal protein S13 OS=Homo sapiens GN=RPS13 PE=1 SV=2	226.4	459.9	399.8	5	7	6	33.1	42.4	37.7
249	P14923	Junction plakoglobin OS=Homo sapiens GN=JUP PE=1 SV=3	1423.0	377.5	870.5	25	7	19	36.2	13.2	27.5
250	Q96QE3	ATPase family AAA domain-containing protein 5 OS=Homo sapiens GN=ATAD5 PE=1 SV=4	52.2	399.4	58.2	2	7	1	0.9	4.1	0.4
251	P55769	NHP2-like protein 1 OS=Homo sapiens GN=NHP2L1 PE=1 SV=3	150.7	268.7	136.8	3	6	3	24.2	56.2	24.2
252	P05141	ADP/ATP translocase 2 OS=Homo sapiens GN=SLC25A5 PE=1 SV=7	63.9	349.1	268.7	2	6	7	6.7	19.5	22.8
253	P62917	60S ribosomal protein L8 OS=Homo sapiens GN=RPL8 PE=1 SV=2	193.2	400.7	272.6	4	6	4	13.6	17.1	13.6
254	Q16629	Serine/arginine-rich splicing factor 7 OS=Homo sapiens GN=SRSF7 PE=1 SV=1	151.5	267.6	217.7	4	6	6	12.6	22.3	20.6
255	P23246	Splicing factor, proline- and glutamine-rich OS=Homo sapiens GN=SFPQ PE=1 SV=2	84.5	435.4	283.4	2	6	5	3.3	12.4	9.1
256	Q2NKX8	DNA excision repair protein ERCC-6-like OS=Homo sapiens GN=ERCC6L PE=1 SV=1	462.2	240.0	532.9	11	6	12	9.5	7.0	11.1
257	Q5D862	Filaggrin-2 OS=Homo sapiens GN=FLG2 PE=1 SV=1	653.5	368.7	309.3	12	6	6	12.5	4.7	5.5
258	P26599	Polypyrimidine tract-binding protein 1 OS=Homo sapiens GN=PTBP1 PE=1 SV=1	92.3	286.9	308.5	2	6	5	7.7	16.6	14.3
259	Q13148	TAR DNA-binding protein 43 OS=Homo sapiens GN=TARDBP PE=1 SV=1	63.2	351.7	270.3	2	6	7	5.1	25.8	22.2
260	Q03701	CCAAT/enhancer-binding protein zeta OS=Homo sapiens GN=CEBPZ PE=1 SV=3	523.4	267.4	257.4	11	6	5	12.6	6.6	6.0
261	P42677	40S ribosomal protein S27 OS=Homo sapiens GN=RPS27 PE=1 SV=3	193.3	306.9	265.8	4	6	6	31.0	40.5	40.5
262	O14979	Heterogeneous nuclear ribonucleoprotein D-like OS=Homo sapiens GN=HNRNPDL PE=1 SV=3	56.3	317.8	313.5	2	6	8	5.7	13.3	15.2
263	Q8N1N4	Keratin, type II cytoskeletal 78 OS=Homo sapiens GN=KRT78 PE=2 SV=2	843.7	417.5	373.4	10	6	7	25.4	13.7	15.4
264	Q9NRX1	RNA-binding protein PNO1 OS=Homo sapiens GN=PNO1 PE=1 SV=1	227.2	355.5	306.1	5	6	6	23.4	29.0	29.0
265	P81605	Dermcidin OS=Homo sapiens GN=DCD PE=1 SV=2	355.2	299.2	432.4	6	6	7	40.9	40.9	47.3
266	P02768	Serum albumin OS=Homo sapiens GN=ALB PE=1 SV=2	352.2	232.4	219.7	8	6	6	12.6	8.7	8.7
267	O75694	Nuclear pore complex protein Nup155 OS=Homo sapiens GN=NUP155 PE=1 SV=1	868.2	246.2	1084.9	22	6	27	17.9	5.0	19.6
268	O14950	Myosin regulatory light chain 12B OS=Homo sapiens GN=MYL12B PE=1 SV=2	267.3	336.7	330.6	5	6	7	29.7	40.1	50.6
269	Q15645	Pachytene checkpoint protein 2 homolog OS=Homo sapiens GN=TRIP13 PE=1 SV=2	50.8	261.6	182.1	2	6	5	4.2	16.0	11.8
270	Q9Y5S9	RNA-binding protein 8A OS=Homo sapiens GN=RBM8A PE=1 SV=1	129.8	250.2	140.3	4	6	4	21.8	26.4	21.8
271	P05089	Arginase-1 OS=Homo sapiens GN=ARG1 PE=1 SV=2	545.6	243.1	233.1	10	6	6	34.8	18.0	16.8
272	P23588	Eukaryotic translation initiation factor 4B OS=Homo sapiens GN=EIF4B PE=1 SV=2	182.9	292.2	166.7	4	6	4	8.5	14.9	12.6
273	Q96RE7	Nucleus accumbens-associated protein 1 OS=Homo sapiens GN=NACC1 PE=1 SV=1	103.4	250.1	163.1	3	5	4	6.1	12.1	8.9
274	P47929	Galectin-7 OS=Homo sapiens GN=LGALS7 PE=1 SV=2	102.4	245.7	93.4	2	5	4	16.9	45.6	34.6
275	P49368	T-complex protein 1 subunit gamma OS=Homo sapiens GN=CCT3 PE=1 SV=4	72.8	302.5	169.2	2	5	4	4.0	9.5	7.2
276	Q96HS1	Serine/threonine-protein phosphatase PGAM5, mitochondrial OS=Homo sapiens GN=PGAM5 PE=1 SV=2	152.2	238.8	155.2	4	5	4	12.8	15.2	12.8
277	P31942	Heterogeneous nuclear ribonucleoprotein H3 OS=Homo sapiens GN=HNRNPH3 PE=1 SV=2	107.6	276.8	251.1	2	5	4	7.5	15.3	12.4
278	P46940	Ras GTPase-activating-like protein IQGAP1 OS=Homo sapiens GN=IQGAP1 PE=1 SV=1	432.9	191.5	1055.9	11	5	21	8.3	3.8	15.3
279	P62979	Ubiquitin-40S ribosomal protein S27a OS=Homo sapiens GN=RPS27A PE=1 SV=2	190.0	208.1	580.7	3	5	11	24.4	34.0	46.2
280	O14744	Protein arginine N-methyltransferase 5 OS=Homo sapiens GN=PRMT5 PE=1 SV=4	442.4	233.1	174.4	9	5	4	16.6	11.5	9.9
281	Q86V81	THO complex subunit 4 OS=Homo sapiens GN=ALYREF PE=1 SV=3	65.9	288.8	158.8	2	5	2	11.3	41.2	11.3
282	P83731	60S ribosomal protein L24 OS=Homo sapiens GN=RPL24 PE=1 SV=1	75.7	255.9	188.5	2	5	4	8.3	25.5	20.4
283	P05109	Protein S100-A8 OS=Homo sapiens GN=S100A8 PE=1 SV=1	191.6	178.7	65.1	4	5	2	33.3	40.9	20.4
284	P84090	Enhancer of rudimentary homolog OS=Homo sapiens GN=ERH PE=1 SV=1	209.4	216.6	190.8	5	5	5	27.9	27.9	27.9
285	P62330	ADP-ribosylation factor 6 OS=Homo sapiens GN=ARF6 PE=1 SV=2	55.8	256.2	241.3	2	5	5	12.6	38.9	38.9
286	Q6P3W7	SCY1-like protein 2 OS=Homo sapiens GN=SCYL2 PE=1 SV=1	71.8	212.2	59.6	2	5	2	2.7	5.6	2.9
287	P04406	Glyceraldehyde-3-phosphate dehydrogenase OS=Homo sapiens GN=GAPDH PE=1 SV=3	425.9	181.9	250.0	11	4	6	35.5	13.1	14.0
288	Q6KB66	Keratin, type II cytoskeletal 80 OS=Homo sapiens GN=KRT80 PE=1 SV=2	569.3	242.2	280.0	10	4	4	24.6	10.0	9.5
289	O75477	Erlin-1 OS=Homo sapiens GN=ERLIN1 PE=1 SV=1	108.6	189.9	183.4	2	4	3	6.9	15.9	11.0
290	P46776	60S ribosomal protein L27a OS=Homo sapiens GN=RPL27A PE=1 SV=2	108.2	227.7	196.1	2	4	4	14.2	27.7	27.7
291	P50402	Emerin OS=Homo sapiens GN=EMD PE=1 SV=1	84.9	209.3	49.0	1	4	1	4.7	22.0	4.7
292	Q9UKX2	Myosin-2 OS=Homo sapiens GN=MYH2 PE=1 SV=1	78.8	187.0	84.3	2	4	2	1.0	1.6	1.0
293	Q9NX24	H/ACA ribonucleoprotein complex subunit 2 OS=Homo sapiens GN=NHP2 PE=1 SV=1	123.1	264.4	138.8	2	4	3	19.0	31.4	31.4
294	P62913	60S ribosomal protein L11 OS=Homo sapiens GN=RPL11 PE=1 SV=2	182.0	293.3	219.2	5	4	4	33.7	29.2	29.2
295	P63173	60S ribosomal protein L38 OS=Homo sapiens GN=RPL38 PE=1 SV=2	156.8	202.1	94.3	3	4	2	35.7	35.7	32.9
296	Q9Y3Y2	Chromatin target of PRMT1 protein OS=Homo sapiens GN=CHTOP PE=1 SV=2	74.3	197.7	156.7	2	4	3	10.5	23.0	13.7
297	O15479	Melanoma-associated antigen B2 OS=Homo sapiens GN=MAGEB2 PE=1 SV=3	122.9	194.1	213.8	2	4	5	7.8	13.8	19.1
298	P68032	Actin, alpha cardiac muscle 1 OS=Homo sapiens GN=ACTC1 PE=1 SV=1	598.7	619.2	752.7	3	4	5	7.7	10.3	20.7
299	Q08554	Desmocollin-1 OS=Homo sapiens GN=DSC1 PE=1 SV=2	504.8	204.2	138.8	11	4	4	12.5	4.5	3.4
300	P46783	40S ribosomal protein S10 OS=Homo sapiens GN=RPS10 PE=1 SV=1	82.0	265.8	177.2	2	4	3	17.6	23.6	23.0
301	P62851	40S ribosomal protein S25 OS=Homo sapiens GN=RPS25 PE=1 SV=1	57.0	202.1	191.1	2	4	3	14.4	24.0	24.0
302	Q13151	Heterogeneous nuclear ribonucleoprotein A0 OS=Homo sapiens GN=HNRNPA0 PE=1 SV=1	76.5	338.1	295.7	1	4	4	5.6	22.3	22.3
303	Q92922	SWI/SNF complex subunit SMARCC1 OS=Homo sapiens GN=SMARCC1 PE=1 SV=3	378.9	108.2	366.1	5	4	5	5.2	3.7	5.6
304	Q13435	Splicing factor 3B subunit 2 OS=Homo sapiens GN=SF3B2 PE=1 SV=2	77.1	146.9	156.7	1	4	3	1.1	4.6	4.0
305	P62266	40S ribosomal protein S23 OS=Homo sapiens GN=RPS23 PE=1 SV=3	119.6	205.5	140.9	3	4	3	16.1	35.0	16.1
306	P43358	Melanoma-associated antigen 4 OS=Homo sapiens GN=MAGEA4 PE=1 SV=2	53.2	221.5	104.2	1	4	3	2.2	13.2	7.9
307	P62873	Guanine nucleotide-binding protein G(I)/G(S)/G(T) subunit beta-1 OS=Homo sapiens GN=GNB1 PE=1 SV=3	172.1	160.0	172.0	4	4	5	9.7	11.5	12.9
308	O00422	Histone deacetylase complex subunit SAP18 OS=Homo sapiens GN=SAP18 PE=1 SV=1	113.6	153.4	86.8	2	4	2	15.0	30.1	15.0
309	Q00610	Clathrin heavy chain 1 OS=Homo sapiens GN=CLTC PE=1 SV=5	761.4	86.7	990.2	19	3	22	14.3	1.9	16.2
310	P25440	Bromodomain-containing protein 2 OS=Homo sapiens GN=BRD2 PE=1 SV=2	49.8	141.6	103.6	2	3	3	3.1	4.2	3.9
311	Q9NZT1	Calmodulin-like protein 5 OS=Homo sapiens GN=CALML5 PE=1 SV=2	141.1	128.9	140.0	4	3	2	40.4	26.7	21.2
312	P05198	Eukaryotic translation initiation factor 2 subunit 1 OS=Homo sapiens GN=EIF2S1 PE=1 SV=3	72.6	161.0	263.3	1	3	4	3.8	9.5	14.3
313	Q02539	Histone H1.1 OS=Homo sapiens GN=HIST1H1A PE=1 SV=3	148.0	431.8	357.3	1	3	3	9.3	14.0	14.0
314	P53999	Activated RNA polymerase II transcriptional coactivator p15 OS=Homo sapiens GN=SUB1 PE=1 SV=3	79.0	146.9	110.1	1	3	2	10.2	23.6	18.9
315	P52907	F-actin-capping protein subunit alpha-1 OS=Homo sapiens GN=CAPZA1 PE=1 SV=3	79.9	88.2	139.8	2	3	3	11.9	17.1	17.1
316	P35268	60S ribosomal protein L22 OS=Homo sapiens GN=RPL22 PE=1 SV=2	114.2	239.8	251.5	2	3	3	18.8	30.5	30.5
317	P25311	Zinc-alpha-2-glycoprotein OS=Homo sapiens GN=AZGP1 PE=1 SV=2	101.6	121.9	70.3	2	3	1	5.7	11.4	3.4
318	P32119	Peroxiredoxin-2 OS=Homo sapiens GN=PRDX2 PE=1 SV=5	285.8	136.1	90.4	6	3	2	26.8	15.2	10.1
319	P50454	Serpin H1 OS=Homo sapiens GN=SERPINH1 PE=1 SV=2	82.0	194.1	494.3	1	3	10	6.2	12.7	34.9
320	P62140	Serine/threonine-protein phosphatase PP1-beta catalytic subunit OS=Homo sapiens GN=PPP1CB PE=1 SV=3	158.0	437.0	329.1	4	3	2	10.7	8.0	3.1
321	P61964	WD repeat-containing protein 5 OS=Homo sapiens GN=WDR5 PE=1 SV=1	56.8	138.7	110.4	2	3	2	7.8	15.0	7.8
322	P62854	40S ribosomal protein S26 OS=Homo sapiens GN=RPS26 PE=1 SV=3	101.4	156.3	143.6	2	3	2	20.9	33.9	20.9
323	P12035	Keratin, type II cytoskeletal 3 OS=Homo sapiens GN=KRT3 PE=1 SV=3	882.2	614.7	681.1	2	3	3	3.2	3.5	4.1
324	P19013	Keratin, type II cytoskeletal 4 OS=Homo sapiens GN=KRT4 PE=1 SV=4	311.2	388.7	379.5	3	3	4	5.8	7.9	9.0
325	P62318	Small nuclear ribonucleoprotein Sm D3 OS=Homo sapiens GN=SNRPD3 PE=1 SV=1	76.1	113.6	106.8	1	3	3	7.9	15.1	15.1
326	P60866	40S ribosomal protein S20 OS=Homo sapiens GN=RPS20 PE=1 SV=1	108.7	188.2	195.9	2	3	4	19.3	22.7	23.5
327	O75400	Pre-mRNA-processing factor 40 homolog A OS=Homo sapiens GN=PRPF40A PE=1 SV=2	68.4	209.9	165.4	2	3	4	2.3	5.2	4.8
328	P62857	40S ribosomal protein S28 OS=Homo sapiens GN=RPS28 PE=1 SV=1	91.7	137.1	126.2	3	3	3	30.4	30.4	30.4
329	Q8WZ42	Titin OS=Homo sapiens GN=TTN PE=1 SV=4	105.3	229.3	245.5	1	3	3	0.0	0.1	0.1
330	P07339	Cathepsin D OS=Homo sapiens GN=CTSD PE=1 SV=1	204.8	157.5	62.4	4	3	1	12.1	9.5	1.9
331	P61626	Lysozyme C OS=Homo sapiens GN=LYZ PE=1 SV=1	155.0	105.8	74.8	4	3	1	22.3	16.9	8.1
332	Q5VSP4	Putative lipocalin 1-like protein 1 OS=Homo sapiens GN=LCN1P1 PE=5 SV=1	46.5	85.3	61.7	1	2	1	6.8	9.9	6.8
333	P36873	Serine/threonine-protein phosphatase PP1-gamma catalytic subunit OS=Homo sapiens GN=PPP1CC PE=1 SV=1	137.2	437.4	295.7	1	2	1	3.1	5.9	3.1
334	Q13867	Bleomycin hydrolase OS=Homo sapiens GN=BLMH PE=1 SV=1	304.7	130.7	56.8	6	2	1	18.9	5.5	2.4
335	Q5T749	Keratinocyte proline-rich protein OS=Homo sapiens GN=KPRP PE=1 SV=1	76.8	78.3	81.4	2	2	2	1.2	1.2	1.2
336	Q02880	DNA topoisomerase 2-beta OS=Homo sapiens GN=TOP2B PE=1 SV=3	965.6	337.0	2028.4	13	2	29	7.9	1.4	20.9
337	P04259	Keratin, type II cytoskeletal 6B OS=Homo sapiens GN=KRT6B PE=1 SV=5	2227.7	1732.7	2041.9	4	2	2	6.4	4.8	4.6
338	P20930	Filaggrin OS=Homo sapiens GN=FLG PE=1 SV=3	247.6	100.8	128.4	5	2	2	1.5	0.4	0.4
339	Q6UWP8	Suprabasin OS=Homo sapiens GN=SBSN PE=2 SV=2	113.9	131.0	101.5	2	2	2	5.4	6.1	6.1
340	P01605	Ig kappa chain V-I region Lay OS=Homo sapiens PE=1 SV=1	63.2	63.7	67.9	1	2	2	16.7	25.0	25.0
341	Q9BQA1	Methylosome protein 50 OS=Homo sapiens GN=WDR77 PE=1 SV=1	73.2	84.5	74.6	1	2	2	2.0	6.4	6.4
342	P01859	Ig gamma-2 chain C region OS=Homo sapiens GN=IGHG2 PE=1 SV=2	128.0	117.0	87.6	3	2	2	8.6	5.2	5.2
343	Q9NRL2	Bromodomain adjacent to zinc finger domain protein 1A OS=Homo sapiens GN=BAZ1A PE=1 SV=2	87.7	65.7	342.1	2	2	6	2.2	2.2	6.4
344	P62306	Small nuclear ribonucleoprotein F OS=Homo sapiens GN=SNRPF PE=1 SV=1	65.4	61.5	67.5	2	2	2	15.1	15.1	15.1
345	Q14240	Eukaryotic initiation factor 4A-II OS=Homo sapiens GN=EIF4A2 PE=1 SV=2	529.2	761.9	842.1	1	2	4	5.2	7.9	14.3
346	P31943	Heterogeneous nuclear ribonucleoprotein H OS=Homo sapiens GN=HNRNPH1 PE=1 SV=4	115.2	212.3	210.8	1	2	2	3.6	7.3	7.3
347	P63208	S-phase kinase-associated protein 1 OS=Homo sapiens GN=SKP1 PE=1 SV=2	84.0	163.4	125.2	1	2	2	7.4	19.0	19.0
348	P42704	Leucine-rich PPR motif-containing protein, mitochondrial OS=Homo sapiens GN=LRPPRC PE=1 SV=3	1790.5	178.6	2142.3	40	2	52	33.4	1.3	37.9
349	Q9UNY4	Transcription termination factor 2 OS=Homo sapiens GN=TTF2 PE=1 SV=2	218.6	70.4	181.5	5	2	4	4.2	1.6	3.8
350	P04040	Catalase OS=Homo sapiens GN=CAT PE=1 SV=3	376.2	111.6	124.5	9	2	2	20.1	4.2	4.2
351	P02538	Keratin, type II cytoskeletal 6A OS=Homo sapiens GN=KRT6A PE=1 SV=3	2256.0	1756.3	2209.7	2	2	3	3.5	3.5	5.7
352	P62158	Calmodulin OS=Homo sapiens GN=CALM1 PE=1 SV=2	79.4	75.7	92.5	2	2	2	22.1	22.1	22.1
353	P05412	Transcription factor AP-1 OS=Homo sapiens GN=JUN PE=1 SV=2	84.2	117.0	72.9	2	2	2	6.9	6.9	8.8
354	P61254	60S ribosomal protein L26 OS=Homo sapiens GN=RPL26 PE=1 SV=1	211.1	537.0	347.5	5	2	8	28.3	13.8	40.0
355	P05386	60S acidic ribosomal protein P1 OS=Homo sapiens GN=RPLP1 PE=1 SV=1	53.7	228.6	53.5	1	2	1	14.0	51.8	14.0
356	O00148	ATP-dependent RNA helicase DDX39A OS=Homo sapiens GN=DDX39A PE=1 SV=2	407.0	478.7	548.1	11	2	3	23.0	4.0	8.4
357	P46779	60S ribosomal protein L28 OS=Homo sapiens GN=RPL28 PE=1 SV=3	97.5	119.8	100.5	2	2	2	13.1	13.1	13.1
358	Q9HCY8	Protein S100-A14 OS=Homo sapiens GN=S100A14 PE=1 SV=1	102.3	81.4	95.4	2	1	2	25.0	14.4	23.1
359	P13646	Keratin, type I cytoskeletal 13 OS=Homo sapiens GN=KRT13 PE=1 SV=4	712.8	535.0	666.5	6	1	6	12.0	3.1	14.6
360	O14556	Glyceraldehyde-3-phosphate dehydrogenase, testis-specific OS=Homo sapiens GN=GAPDHS PE=1 SV=2	73.3	72.7	76.1	1	1	1	1.2	1.2	1.2
361	Q8TAQ2	SWI/SNF complex subunit SMARCC2 OS=Homo sapiens GN=SMARCC2 PE=1 SV=1	545.5	71.7	568.4	13	1	13	13.3	0.6	13.1
362	P04899	Guanine nucleotide-binding protein G(i) subunit alpha-2 OS=Homo sapiens GN=GNAI2 PE=1 SV=3	135.1	103.9	89.2	3	1	1	8.5	4.2	2.3
363	Q8IZL8	Proline-, glutamic acid- and leucine-rich protein 1 OS=Homo sapiens GN=PELP1 PE=1 SV=2	664.8	52.7	548.9	13	1	11	14.4	1.2	11.9
364	Q7Z5K2	Wings apart-like protein homolog OS=Homo sapiens GN=WAPAL PE=1 SV=1	460.3	52.4	370.6	12	1	10	11.9	0.8	9.9
365	P12273	Prolactin-inducible protein OS=Homo sapiens GN=PIP PE=1 SV=1	83.7	52.1	68.2	1	1	1	8.2	8.2	8.2
366	P10599	Thioredoxin OS=Homo sapiens GN=TXN PE=1 SV=3	122.7	91.1	51.4	2	1	1	23.8	12.4	12.4
367	Q15427	Splicing factor 3B subunit 4 OS=Homo sapiens GN=SF3B4 PE=1 SV=1	52.6	72.6	78.0	1	1	2	3.3	3.3	7.3
368	O95239	Chromosome-associated kinesin KIF4A OS=Homo sapiens GN=KIF4A PE=1 SV=3	857.3	61.0	1284.1	20	1	28	18.2	1.0	24.2
369	Q15021	Condensin complex subunit 1 OS=Homo sapiens GN=NCAPD2 PE=1 SV=3	800.2	66.4	778.6	18	1	16	18.7	0.9	16.8
370	Q13835	Plakophilin-1 OS=Homo sapiens GN=PKP1 PE=1 SV=2	556.6	76.3	378.1	13	1	7	18.5	0.9	9.2
371	P35030	Trypsin-3 OS=Homo sapiens GN=PRSS3 PE=1 SV=2	66.3	49.9	91.5	1	1	1	4.3	4.3	4.3
372	Q5QNW6	Histone H2B type 2-F OS=Homo sapiens GN=HIST2H2BF PE=1 SV=3	91.6	182.7	175.1	3	1	1	19.0	7.9	7.9

## Sheet: TRIM
			Mascot Score			No of peptides			Sequence coverage %
Row	Accession	Name	empty vector	Ki67	TRIM	empty vector	Ki67	TRIM	empty vector	Ki67	TRIM
1	Q13885	Tubulin beta-2A chain OS=Homo sapiens GN=TUBB2A PE=1 SV=1	0.0	0.0	804.2	0	0	19	0.0	0.0	37.8
2	Q9Y613	FH1/FH2 domain-containing protein 1 OS=Homo sapiens GN=FHOD1 PE=1 SV=3	0.0	0.0	738.1	0	0	16	0.0	0.0	19.1
3	Q14533	Keratin, type II cuticular Hb1 OS=Homo sapiens GN=KRT81 PE=1 SV=3	0.0	0.0	673.4	0	0	13	0.0	0.0	12.5
4	P31947	14-3-3 protein sigma OS=Homo sapiens GN=SFN PE=1 SV=1	0.0	0.0	329.5	0	0	9	0.0	0.0	25.4
5	B5ME19	Eukaryotic translation initiation factor 3 subunit C-like protein OS=Homo sapiens GN=EIF3CL PE=2 SV=1	0.0	0.0	401.9	0	0	8	0.0	0.0	9.7
6	Q71DI3	Histone H3.2 OS=Homo sapiens GN=HIST2H3A PE=1 SV=3	0.0	0.0	264.0	0	0	7	0.0	0.0	28.7
7	Q13418	Integrin-linked protein kinase OS=Homo sapiens GN=ILK PE=1 SV=2	0.0	0.0	174.9	0	0	6	0.0	0.0	12.4
8	Q7L576	Cytoplasmic FMR1-interacting protein 1 OS=Homo sapiens GN=CYFIP1 PE=1 SV=1	0.0	0.0	264.2	0	0	6	0.0	0.0	5.6
9	Q13228	Selenium-binding protein 1 OS=Homo sapiens GN=SELENBP1 PE=1 SV=2	0.0	0.0	217.6	0	0	5	0.0	0.0	11.4
10	P13639	Elongation factor 2 OS=Homo sapiens GN=EEF2 PE=1 SV=4	0.0	0.0	215.2	0	0	5	0.0	0.0	5.4
11	Q15773	Myeloid leukemia factor 2 OS=Homo sapiens GN=MLF2 PE=1 SV=1	0.0	0.0	138.8	0	0	4	0.0	0.0	14.5
12	O15397	Importin-8 OS=Homo sapiens GN=IPO8 PE=1 SV=2	0.0	0.0	138.7	0	0	3	0.0	0.0	3.4
13	Q13347	Eukaryotic translation initiation factor 3 subunit I OS=Homo sapiens GN=EIF3I PE=1 SV=1	0.0	0.0	100.5	0	0	3	0.0	0.0	9.8
14	P62495	Eukaryotic peptide chain release factor subunit 1 OS=Homo sapiens GN=ETF1 PE=1 SV=3	0.0	0.0	140.5	0	0	3	0.0	0.0	11.2
15	P29692	Elongation factor 1-delta OS=Homo sapiens GN=EEF1D PE=1 SV=5	0.0	0.0	130.2	0	0	3	0.0	0.0	17.4
16	Q96H79	Zinc finger CCCH-type antiviral protein 1-like OS=Homo sapiens GN=ZC3HAV1L PE=1 SV=2	0.0	0.0	52.9	0	0	3	0.0	0.0	14.3
17	P28838	Cytosol aminopeptidase OS=Homo sapiens GN=LAP3 PE=1 SV=3	0.0	0.0	111.4	0	0	3	0.0	0.0	6.0
18	Q96QE5	Transcription elongation factor, mitochondrial OS=Homo sapiens GN=TEFM PE=1 SV=1	0.0	0.0	118.4	0	0	3	0.0	0.0	6.1
19	Q9Y446	Plakophilin-3 OS=Homo sapiens GN=PKP3 PE=1 SV=1	0.0	0.0	109.6	0	0	3	0.0	0.0	5.9
20	Q5VU13	V-set and immunoglobulin domain-containing protein 8 OS=Homo sapiens GN=VSIG8 PE=1 SV=1	0.0	0.0	170.6	0	0	3	0.0	0.0	7.0
21	Q6P2E9	Enhancer of mRNA-decapping protein 4 OS=Homo sapiens GN=EDC4 PE=1 SV=1	0.0	0.0	128.7	0	0	3	0.0	0.0	3.8
22	P42695	Condensin-2 complex subunit D3 OS=Homo sapiens GN=NCAPD3 PE=1 SV=2	0.0	0.0	166.2	0	0	3	0.0	0.0	3.1
23	P25705	ATP synthase subunit alpha, mitochondrial OS=Homo sapiens GN=ATP5A1 PE=1 SV=1	0.0	0.0	100.4	0	0	3	0.0	0.0	6.0
24	O76009	Keratin, type I cuticular Ha3-I OS=Homo sapiens GN=KRT33A PE=2 SV=2	0.0	0.0	525.7	0	0	2	0.0	0.0	4.5
25	Q6IBW4	Condensin-2 complex subunit H2 OS=Homo sapiens GN=NCAPH2 PE=1 SV=1	0.0	0.0	63.6	0	0	2	0.0	0.0	3.1
26	Q16891	Mitochondrial inner membrane protein OS=Homo sapiens GN=IMMT PE=1 SV=1	0.0	0.0	57.4	0	0	2	0.0	0.0	2.2
27	Q6Y7W6	PERQ amino acid-rich with GYF domain-containing protein 2 OS=Homo sapiens GN=GIGYF2 PE=1 SV=1	0.0	0.0	102.7	0	0	2	0.0	0.0	1.8
28	Q9Y6X9	MORC family CW-type zinc finger protein 2 OS=Homo sapiens GN=MORC2 PE=1 SV=2	0.0	0.0	83.3	0	0	2	0.0	0.0	1.4
29	Q14203	Dynactin subunit 1 OS=Homo sapiens GN=DCTN1 PE=1 SV=3	0.0	0.0	159.9	0	0	2	0.0	0.0	1.9
30	Q13155	Aminoacyl tRNA synthase complex-interacting multifunctional protein 2 OS=Homo sapiens GN=AIMP2 PE=1 SV=2	0.0	0.0	56.6	0	0	2	0.0	0.0	10.6
31	P17931	Galectin-3 OS=Homo sapiens GN=LGALS3 PE=1 SV=5	0.0	0.0	91.6	0	0	2	0.0	0.0	8.8
32	Q13619	Cullin-4A OS=Homo sapiens GN=CUL4A PE=1 SV=3	0.0	0.0	69.1	0	0	2	0.0	0.0	2.9
33	P63172	Dynein light chain Tctex-type 1 OS=Homo sapiens GN=DYNLT1 PE=1 SV=1	0.0	0.0	107.2	0	0	2	0.0	0.0	30.1
34	P68366	Tubulin alpha-4A chain OS=Homo sapiens GN=TUBA4A PE=1 SV=1	0.0	0.0	435.3	0	0	2	0.0	0.0	5.4
35	Q9ULK4	Mediator of RNA polymerase II transcription subunit 23 OS=Homo sapiens GN=MED23 PE=1 SV=2	0.0	0.0	80.8	0	0	2	0.0	0.0	1.5
36	Q9UNI6	Dual specificity protein phosphatase 12 OS=Homo sapiens GN=DUSP12 PE=1 SV=1	0.0	0.0	78.5	0	0	2	0.0	0.0	6.2
37	Q86VM9	Zinc finger CCCH domain-containing protein 18 OS=Homo sapiens GN=ZC3H18 PE=1 SV=2	0.0	0.0	70.4	0	0	2	0.0	0.0	2.8
38	O95678	Keratin, type II cytoskeletal 75 OS=Homo sapiens GN=KRT75 PE=1 SV=2	0.0	0.0	734.1	0	0	2	0.0	0.0	3.8
39	Q6ZSR9	Uncharacterized protein FLJ45252 OS=Homo sapiens PE=2 SV=2	0.0	0.0	54.7	0	0	2	0.0	0.0	7.9
40	Q16643	Drebrin OS=Homo sapiens GN=DBN1 PE=1 SV=4	0.0	0.0	59.7	0	0	2	0.0	0.0	5.4
41	P01614	Ig kappa chain V-II region Cum OS=Homo sapiens PE=1 SV=1	0.0	0.0	206.8	0	0	2	0.0	0.0	13.9
42	P52292	Importin subunit alpha-1 OS=Homo sapiens GN=KPNA2 PE=1 SV=1	0.0	0.0	61.3	0	0	2	0.0	0.0	6.2
43	P48059	LIM and senescent cell antigen-like-containing domain protein 1 OS=Homo sapiens GN=LIMS1 PE=1 SV=4	0.0	0.0	49.9	0	0	2	0.0	0.0	5.5
44	O75190	DnaJ homolog subfamily B member 6 OS=Homo sapiens GN=DNAJB6 PE=1 SV=2	0.0	0.0	92.9	0	0	2	0.0	0.0	7.1
45	P36952	Serpin B5 OS=Homo sapiens GN=SERPINB5 PE=1 SV=2	0.0	0.0	129.7	0	0	2	0.0	0.0	7.2
46	Q96DC9	Ubiquitin thioesterase OTUB2 OS=Homo sapiens GN=OTUB2 PE=1 SV=2	0.0	0.0	76.3	0	0	2	0.0	0.0	9.0
47	A6NCN2	Putative keratin-81-like protein KRT121P OS=Homo sapiens GN=KRT121P PE=5 SV=4	0.0	0.0	392.4	0	0	2	0.0	0.0	7.5
48	Q99570	Phosphoinositide 3-kinase regulatory subunit 4 OS=Homo sapiens GN=PIK3R4 PE=1 SV=3	0.0	0.0	70.6	0	0	2	0.0	0.0	1.5
49	P40763	Signal transducer and activator of transcription 3 OS=Homo sapiens GN=STAT3 PE=1 SV=2	0.0	0.0	72.1	0	0	2	0.0	0.0	3.2
50	P08134	Rho-related GTP-binding protein RhoC OS=Homo sapiens GN=RHOC PE=1 SV=1	0.0	0.0	70.1	0	0	2	0.0	0.0	13.0
51	O14929	Histone acetyltransferase type B catalytic subunit OS=Homo sapiens GN=HAT1 PE=1 SV=1	0.0	0.0	85.5	0	0	2	0.0	0.0	3.1
52	Q15398	Disks large-associated protein 5 OS=Homo sapiens GN=DLGAP5 PE=1 SV=2	0.0	0.0	66.0	0	0	2	0.0	0.0	3.5
53	O94832	Unconventional myosin-Id OS=Homo sapiens GN=MYO1D PE=1 SV=2	0.0	0.0	84.7	0	0	2	0.0	0.0	1.9
54	Q9NRG0	Chromatin accessibility complex protein 1 OS=Homo sapiens GN=CHRAC1 PE=1 SV=1	0.0	0.0	118.2	0	0	2	0.0	0.0	19.8
55	Q15493	Regucalcin OS=Homo sapiens GN=RGN PE=1 SV=1	0.0	0.0	51.5	0	0	2	0.0	0.0	5.7
56	Q8TEQ6	Gem-associated protein 5 OS=Homo sapiens GN=GEMIN5 PE=1 SV=3	0.0	0.0	49.5	0	0	2	0.0	0.0	1.7
57	P58107	Epiplakin OS=Homo sapiens GN=EPPK1 PE=1 SV=2	0.0	0.0	263.7	0	0	1	0.0	0.0	0.1
58	P62937	Peptidyl-prolyl cis-trans isomerase A OS=Homo sapiens GN=PPIA PE=1 SV=2	0.0	0.0	71.0	0	0	1	0.0	0.0	10.9
59	Q9Y620	DNA repair and recombination protein RAD54B OS=Homo sapiens GN=RAD54B PE=1 SV=1	0.0	0.0	53.3	0	0	1	0.0	0.0	1.1
60	P56192	Methionine--tRNA ligase, cytoplasmic OS=Homo sapiens GN=MARS PE=1 SV=2	0.0	0.0	64.9	0	0	1	0.0	0.0	1.1
61	Q9NSB4	Keratin, type II cuticular Hb2 OS=Homo sapiens GN=KRT82 PE=1 SV=3	0.0	0.0	170.6	0	0	1	0.0	0.0	1.9
62	O00116	Alkyldihydroxyacetonephosphate synthase, peroxisomal OS=Homo sapiens GN=AGPS PE=1 SV=1	0.0	0.0	53.0	0	0	1	0.0	0.0	2.6
63	Q969R5	Lethal(3)malignant brain tumor-like protein 2 OS=Homo sapiens GN=L3MBTL2 PE=1 SV=1	0.0	0.0	72.5	0	0	1	0.0	0.0	1.8
64	Q86SJ6	Desmoglein-4 OS=Homo sapiens GN=DSG4 PE=1 SV=1	0.0	0.0	61.9	0	0	1	0.0	0.0	0.8
65	O15118	Niemann-Pick C1 protein OS=Homo sapiens GN=NPC1 PE=1 SV=2	0.0	0.0	51.0	0	0	1	0.0	0.0	0.6
66	O15405	TOX high mobility group box family member 3 OS=Homo sapiens GN=TOX3 PE=1 SV=2	0.0	0.0	62.1	0	0	1	0.0	0.0	2.3
67	O14647	Chromodomain-helicase-DNA-binding protein 2 OS=Homo sapiens GN=CHD2 PE=1 SV=2	0.0	0.0	62.6	0	0	1	0.0	0.0	0.5
68	Q9P0S9	Transmembrane protein 14C OS=Homo sapiens GN=TMEM14C PE=1 SV=1	0.0	0.0	62.3	0	0	1	0.0	0.0	25.9
69	Q7Z3Z3	Piwi-like protein 3 OS=Homo sapiens GN=PIWIL3 PE=2 SV=2	0.0	0.0	50.6	0	0	1	0.0	0.0	0.8
70	Q2M2I8	AP2-associated protein kinase 1 OS=Homo sapiens GN=AAK1 PE=1 SV=3	0.0	0.0	54.7	0	0	1	0.0	0.0	1.6
71	O60244	Mediator of RNA polymerase II transcription subunit 14 OS=Homo sapiens GN=MED14 PE=1 SV=2	0.0	0.0	59.9	0	0	1	0.0	0.0	0.6
72	Q8NFW8	N-acylneuraminate cytidylyltransferase OS=Homo sapiens GN=CMAS PE=1 SV=2	0.0	0.0	48.3	0	0	1	0.0	0.0	2.8
73	Q9HAV0	Guanine nucleotide-binding protein subunit beta-4 OS=Homo sapiens GN=GNB4 PE=1 SV=3	0.0	0.0	137.5	0	0	1	0.0	0.0	1.5
74	O75461	Transcription factor E2F6 OS=Homo sapiens GN=E2F6 PE=1 SV=1	0.0	0.0	52.5	0	0	1	0.0	0.0	2.5
75	Q9HAU5	Regulator of nonsense transcripts 2 OS=Homo sapiens GN=UPF2 PE=1 SV=1	0.0	0.0	85.9	0	0	1	0.0	0.0	1.0
76	Q9NVR0	Kelch-like protein 11 OS=Homo sapiens GN=KLHL11 PE=1 SV=1	0.0	0.0	52.0	0	0	1	0.0	0.0	1.0
77	O95294	RasGAP-activating-like protein 1 OS=Homo sapiens GN=RASAL1 PE=1 SV=3	0.0	0.0	96.4	0	0	1	0.0	0.0	0.6
78	P49840	Glycogen synthase kinase-3 alpha OS=Homo sapiens GN=GSK3A PE=1 SV=2	0.0	0.0	128.6	0	0	1	0.0	0.0	2.1
79	Q14532	Keratin, type I cuticular Ha2 OS=Homo sapiens GN=KRT32 PE=1 SV=3	0.0	0.0	234.5	0	0	1	0.0	0.0	2.0
80	P68371	Tubulin beta-4B chain OS=Homo sapiens GN=TUBB4B PE=1 SV=1	0.0	0.0	658.1	0	0	1	0.0	0.0	2.7
81	Q8WZB0	Putative uncharacterized protein encoded by LINC00476 OS=Homo sapiens GN=LINC00476 PE=5 SV=1	0.0	0.0	50.9	0	0	1	0.0	0.0	6.6
82	Q6EEV6	Small ubiquitin-related modifier 4 OS=Homo sapiens GN=SUMO4 PE=1 SV=2	0.0	0.0	65.1	0	0	1	0.0	0.0	12.6
83	P11277	Spectrin beta chain, erythrocytic OS=Homo sapiens GN=SPTB PE=1 SV=5	0.0	0.0	73.3	0	0	1	0.0	0.0	0.4
84	Q9HAU0	Pleckstrin homology domain-containing family A member 5 OS=Homo sapiens GN=PLEKHA5 PE=1 SV=1	0.0	0.0	55.2	0	0	1	0.0	0.0	0.9
85	Q96FJ2	Dynein light chain 2, cytoplasmic OS=Homo sapiens GN=DYNLL2 PE=1 SV=1	0.0	0.0	67.9	0	0	1	0.0	0.0	7.9
86	Q6MZM0	Hephaestin-like protein 1 OS=Homo sapiens GN=HEPHL1 PE=2 SV=2	0.0	0.0	59.2	0	0	1	0.0	0.0	0.7
87	Q15404	Ras suppressor protein 1 OS=Homo sapiens GN=RSU1 PE=1 SV=3	0.0	0.0	77.8	0	0	1	0.0	0.0	3.2
88	P31946	14-3-3 protein beta/alpha OS=Homo sapiens GN=YWHAB PE=1 SV=3	0.0	0.0	92.7	0	0	1	0.0	0.0	5.7
89	O95433	Activator of 90 kDa heat shock protein ATPase homolog 1 OS=Homo sapiens GN=AHSA1 PE=1 SV=1	0.0	0.0	61.8	0	0	1	0.0	0.0	2.7
90	P25686	DnaJ homolog subfamily B member 2 OS=Homo sapiens GN=DNAJB2 PE=1 SV=3	0.0	0.0	76.6	0	0	1	0.0	0.0	4.6
91	Q9UBC5	Unconventional myosin-Ia OS=Homo sapiens GN=MYO1A PE=1 SV=1	0.0	0.0	111.1	0	0	1	0.0	0.0	0.6
92	P35222	Catenin beta-1 OS=Homo sapiens GN=CTNNB1 PE=1 SV=1	0.0	0.0	120.9	0	0	1	0.0	0.0	0.9
93	O60841	Eukaryotic translation initiation factor 5B OS=Homo sapiens GN=EIF5B PE=1 SV=4	0.0	0.0	57.2	0	0	1	0.0	0.0	1.0
94	Q9Y6V7	Probable ATP-dependent RNA helicase DDX49 OS=Homo sapiens GN=DDX49 PE=1 SV=1	0.0	0.0	88.4	0	0	1	0.0	0.0	2.3
95	Q9HC36	RNA methyltransferase-like protein 1 OS=Homo sapiens GN=RNMTL1 PE=1 SV=2	0.0	0.0	67.1	0	0	1	0.0	0.0	1.4
96	Q96BS2	Calcineurin B homologous protein 3 OS=Homo sapiens GN=TESC PE=1 SV=3	0.0	0.0	56.7	0	0	1	0.0	0.0	3.3
97	Q9H6S0	Probable ATP-dependent RNA helicase YTHDC2 OS=Homo sapiens GN=YTHDC2 PE=1 SV=2	0.0	0.0	96.9	0	0	1	0.0	0.0	0.9
98	P53990	IST1 homolog OS=Homo sapiens GN=IST1 PE=1 SV=1	0.0	0.0	50.4	0	0	1	0.0	0.0	3.6
99	Q86SQ0	Pleckstrin homology-like domain family B member 2 OS=Homo sapiens GN=PHLDB2 PE=1 SV=2	0.0	0.0	50.0	0	0	1	0.0	0.0	0.9
100	O95602	DNA-directed RNA polymerase I subunit RPA1 OS=Homo sapiens GN=POLR1A PE=1 SV=2	0.0	0.0	69.5	0	0	1	0.0	0.0	0.6

## Sheet: Empty vector
			Mascot Score			No of peptides			Sequence coverage %
Row	Accession	Name	empty vector	Ki67	TRIM	empty vector	Ki67	TRIM	empty vector	Ki67	TRIM
1	P22735	Protein-glutamine gamma-glutamyltransferase K OS=Homo sapiens GN=TGM1 PE=1 SV=4	420.7	0.0	0.0	11	0	0	15.9	0.0	0.0
2	P42357	Histidine ammonia-lyase OS=Homo sapiens GN=HAL PE=1 SV=1	321.4	0.0	0.0	7	0	0	12.6	0.0	0.0
3	P04083	Annexin A1 OS=Homo sapiens GN=ANXA1 PE=1 SV=2	332.4	0.0	0.0	6	0	0	24.9	0.0	0.0
4	Q9C075	Keratin, type I cytoskeletal 23 OS=Homo sapiens GN=KRT23 PE=1 SV=2	258.2	0.0	0.0	5	0	0	13.7	0.0	0.0
5	Q8WWI1	LIM domain only protein 7 OS=Homo sapiens GN=LMO7 PE=1 SV=3	128.4	0.0	0.0	4	0	0	3.1	0.0	0.0
6	Q7Z3Y8	Keratin, type I cytoskeletal 27 OS=Homo sapiens GN=KRT27 PE=1 SV=2	344.8	0.0	0.0	4	0	0	11.1	0.0	0.0
7	P01876	Ig alpha-1 chain C region OS=Homo sapiens GN=IGHA1 PE=1 SV=2	159.1	0.0	0.0	4	0	0	11.6	0.0	0.0
8	Q9UI42	Carboxypeptidase A4 OS=Homo sapiens GN=CPA4 PE=1 SV=2	170.6	0.0	0.0	4	0	0	16.9	0.0	0.0
9	Q14574	Desmocollin-3 OS=Homo sapiens GN=DSC3 PE=1 SV=3	123.7	0.0	0.0	3	0	0	5.2	0.0	0.0
10	Q01804	OTU domain-containing protein 4 OS=Homo sapiens GN=OTUD4 PE=1 SV=3	131.0	0.0	0.0	3	0	0	3.6	0.0	0.0
11	P04080	Cystatin-B OS=Homo sapiens GN=CSTB PE=1 SV=2	157.2	0.0	0.0	3	0	0	30.6	0.0	0.0
12	P23526	Adenosylhomocysteinase OS=Homo sapiens GN=AHCY PE=1 SV=4	157.9	0.0	0.0	3	0	0	7.4	0.0	0.0
13	A8K2U0	Alpha-2-macroglobulin-like protein 1 OS=Homo sapiens GN=A2ML1 PE=1 SV=3	120.0	0.0	0.0	3	0	0	2.5	0.0	0.0
14	O75342	Arachidonate 12-lipoxygenase, 12R-type OS=Homo sapiens GN=ALOX12B PE=1 SV=1	165.8	0.0	0.0	3	0	0	4.9	0.0	0.0
15	P01591	Immunoglobulin J chain OS=Homo sapiens GN=IGJ PE=1 SV=4	61.1	0.0	0.0	2	0	0	12.6	0.0	0.0
16	Q9P0W8	Spermatogenesis-associated protein 7 OS=Homo sapiens GN=SPATA7 PE=2 SV=3	73.9	0.0	0.0	2	0	0	1.5	0.0	0.0
17	O95625	Zinc finger and BTB domain-containing protein 11 OS=Homo sapiens GN=ZBTB11 PE=1 SV=2	76.1	0.0	0.0	2	0	0	2.2	0.0	0.0
18	Q8WVV4	Protein POF1B OS=Homo sapiens GN=POF1B PE=1 SV=3	99.9	0.0	0.0	2	0	0	3.7	0.0	0.0
19	P12081	Histidine--tRNA ligase, cytoplasmic OS=Homo sapiens GN=HARS PE=1 SV=2	50.9	0.0	0.0	2	0	0	4.3	0.0	0.0
20	Q14151	Scaffold attachment factor B2 OS=Homo sapiens GN=SAFB2 PE=1 SV=1	93.2	0.0	0.0	2	0	0	3.6	0.0	0.0
21	Q96FQ6	Protein S100-A16 OS=Homo sapiens GN=S100A16 PE=1 SV=1	105.6	0.0	0.0	2	0	0	24.3	0.0	0.0
22	Q8IW75	Serpin A12 OS=Homo sapiens GN=SERPINA12 PE=1 SV=1	70.4	0.0	0.0	2	0	0	3.9	0.0	0.0
23	P04745	Alpha-amylase 1 OS=Homo sapiens GN=AMY1A PE=1 SV=2	83.6	0.0	0.0	2	0	0	5.5	0.0	0.0
24	Q15828	Cystatin-M OS=Homo sapiens GN=CST6 PE=1 SV=1	65.5	0.0	0.0	2	0	0	14.1	0.0	0.0
25	P29401	Transketolase OS=Homo sapiens GN=TKT PE=1 SV=3	63.8	0.0	0.0	2	0	0	3.0	0.0	0.0
26	P51571	Translocon-associated protein subunit delta OS=Homo sapiens GN=SSR4 PE=1 SV=1	54.3	0.0	0.0	2	0	0	13.9	0.0	0.0
27	P42345	Serine/threonine-protein kinase mTOR OS=Homo sapiens GN=MTOR PE=1 SV=1	65.2	0.0	0.0	1	0	0	0.2	0.0	0.0
28	O43240	Kallikrein-10 OS=Homo sapiens GN=KLK10 PE=1 SV=3	46.1	0.0	0.0	1	0	0	4.0	0.0	0.0
29	Q7RTS7	Keratin, type II cytoskeletal 74 OS=Homo sapiens GN=KRT74 PE=1 SV=2	187.9	0.0	0.0	1	0	0	3.0	0.0	0.0
30	Q3SY84	Keratin, type II cytoskeletal 71 OS=Homo sapiens GN=KRT71 PE=1 SV=3	201.4	0.0	0.0	1	0	0	2.3	0.0	0.0
31	O60812	Heterogeneous nuclear ribonucleoprotein C-like 1 OS=Homo sapiens GN=HNRNPCL1 PE=1 SV=1	287.0	0.0	0.0	1	0	0	2.7	0.0	0.0
32	Q92817	Envoplakin OS=Homo sapiens GN=EVPL PE=1 SV=3	47.6	0.0	0.0	1	0	0	0.8	0.0	0.0
33	P56537	Eukaryotic translation initiation factor 6 OS=Homo sapiens GN=EIF6 PE=1 SV=1	67.2	0.0	0.0	1	0	0	7.3	0.0	0.0
34	P14136	Glial fibrillary acidic protein OS=Homo sapiens GN=GFAP PE=1 SV=1	104.0	0.0	0.0	1	0	0	1.9	0.0	0.0
35	P16220	Cyclic AMP-responsive element-binding protein 1 OS=Homo sapiens GN=CREB1 PE=1 SV=2	51.5	0.0	0.0	1	0	0	4.1	0.0	0.0
36	Q5JTH9	RRP12-like protein OS=Homo sapiens GN=RRP12 PE=1 SV=2	54.1	0.0	0.0	1	0	0	0.6	0.0	0.0
37	Q9NZN3	EH domain-containing protein 3 OS=Homo sapiens GN=EHD3 PE=1 SV=2	109.3	0.0	0.0	1	0	0	1.7	0.0	0.0
38	Q9P2E3	NFX1-type zinc finger-containing protein 1 OS=Homo sapiens GN=ZNFX1 PE=1 SV=2	53.0	0.0	0.0	1	0	0	0.4	0.0	0.0
39	Q7Z3Y7	Keratin, type I cytoskeletal 28 OS=Homo sapiens GN=KRT28 PE=1 SV=2	320.0	0.0	0.0	1	0	0	6.5	0.0	0.0
40	P09211	Glutathione S-transferase P OS=Homo sapiens GN=GSTP1 PE=1 SV=2	53.6	0.0	0.0	1	0	0	5.2	0.0	0.0
41	Q9P225	Dynein heavy chain 2, axonemal OS=Homo sapiens GN=DNAH2 PE=2 SV=3	51.7	0.0	0.0	1	0	0	0.1	0.0	0.0
42	Q9UQ26	Regulating synaptic membrane exocytosis protein 2 OS=Homo sapiens GN=RIMS2 PE=1 SV=2	47.5	0.0	0.0	1	0	0	0.4	0.0	0.0
43	Q99417	C-Myc-binding protein OS=Homo sapiens GN=MYCBP PE=1 SV=3	56.0	0.0	0.0	1	0	0	10.7	0.0	0.0
44	P35754	Glutaredoxin-1 OS=Homo sapiens GN=GLRX PE=1 SV=2	49.6	0.0	0.0	1	0	0	10.4	0.0	0.0
45	Q7Z3Z0	Keratin, type I cytoskeletal 25 OS=Homo sapiens GN=KRT25 PE=1 SV=1	200.0	0.0	0.0	1	0	0	4.7	0.0	0.0
46	P01877	Ig alpha-2 chain C region OS=Homo sapiens GN=IGHA2 PE=1 SV=3	114.5	0.0	0.0	1	0	0	4.4	0.0	0.0
47	P29536	Leiomodin-1 OS=Homo sapiens GN=LMOD1 PE=1 SV=3	50.3	0.0	0.0	1	0	0	1.2	0.0	0.0
48	P12532	Creatine kinase U-type, mitochondrial OS=Homo sapiens GN=CKMT1A PE=1 SV=1	55.6	0.0	0.0	1	0	0	1.4	0.0	0.0
49	Q01469	Fatty acid-binding protein, epidermal OS=Homo sapiens GN=FABP5 PE=1 SV=3	50.4	0.0	0.0	1	0	0	6.7	0.0	0.0
50	Q6PKG0	La-related protein 1 OS=Homo sapiens GN=LARP1 PE=1 SV=2	88.9	0.0	0.0	1	0	0	1.5	0.0	0.0
51	Q5JXB2	Putative ubiquitin-conjugating enzyme E2 N-like OS=Homo sapiens GN=UBE2NL PE=1 SV=1	66.8	0.0	0.0	1	0	0	7.2	0.0	0.0
52	Q8NHM4	Putative trypsin-6 OS=Homo sapiens GN=TRY6 PE=5 SV=1	49.1	0.0	0.0	1	0	0	8.1	0.0	0.0

## Sheet: A+C
			Mascot Score			No of peptides			Sequence coverage %
Row	Accession	Name	empty vector	Ki67	TRIM	empty vector	Ki67	TRIM	empty vector	Ki67	TRIM
1	Q9NTJ3	Structural maintenance of chromosomes protein 4 OS=Homo sapiens GN=SMC4 PE=1 SV=2	1414.8	0.0	1989.6	31	0	45	28.3	0.0	36.9
2	Q92797	Symplekin OS=Homo sapiens GN=SYMPK PE=1 SV=2	966.6	0.0	966.1	24	0	26	24.2	0.0	26.4
3	Q9NVI1	Fanconi anemia group I protein OS=Homo sapiens GN=FANCI PE=1 SV=4	898.3	0.0	902.9	19	0	20	17.3	0.0	20.2
4	Q9UQE7	Structural maintenance of chromosomes protein 3 OS=Homo sapiens GN=SMC3 PE=1 SV=2	774.2	0.0	1144.2	19	0	26	18.4	0.0	23.3
5	Q14683	Structural maintenance of chromosomes protein 1A OS=Homo sapiens GN=SMC1A PE=1 SV=2	772.5	0.0	1072.4	17	0	28	14.8	0.0	21.4
6	Q92878	DNA repair protein RAD50 OS=Homo sapiens GN=RAD50 PE=1 SV=1	713.2	0.0	841.6	17	0	21	12.0	0.0	15.5
7	Q14146	Unhealthy ribosome biogenesis protein 2 homolog OS=Homo sapiens GN=URB2 PE=1 SV=2	654.0	0.0	485.2	16	0	12	11.5	0.0	8.3
8	O95347	Structural maintenance of chromosomes protein 2 OS=Homo sapiens GN=SMC2 PE=1 SV=2	591.7	0.0	1479.5	16	0	35	16.0	0.0	31.8
9	Q12769	Nuclear pore complex protein Nup160 OS=Homo sapiens GN=NUP160 PE=1 SV=3	378.1	0.0	440.4	10	0	12	7.2	0.0	8.6
10	Q9UPN6	Protein SCAF8 OS=Homo sapiens GN=SCAF8 PE=1 SV=1	320.0	0.0	269.4	8	0	5	9.3	0.0	4.9
11	Q14525	Keratin, type I cuticular Ha3-II OS=Homo sapiens GN=KRT33B PE=2 SV=3	362.2	0.0	378.1	7	0	2	24.3	0.0	3.0
12	Q9UIG0	Tyrosine-protein kinase BAZ1B OS=Homo sapiens GN=BAZ1B PE=1 SV=2	316.8	0.0	512.4	7	0	12	5.5	0.0	9.8
13	Q9NWH9	SAFB-like transcription modulator OS=Homo sapiens GN=SLTM PE=1 SV=2	220.0	0.0	131.0	7	0	3	8.0	0.0	3.1
14	Q9NQW6	Actin-binding protein anillin OS=Homo sapiens GN=ANLN PE=1 SV=2	327.9	0.0	502.2	6	0	12	6.8	0.0	11.9
15	Q8IX01	SURP and G-patch domain-containing protein 2 OS=Homo sapiens GN=SUGP2 PE=1 SV=2	254.0	0.0	76.3	6	0	2	8.2	0.0	2.8
16	Q7Z460	CLIP-associating protein 1 OS=Homo sapiens GN=CLASP1 PE=1 SV=1	227.5	0.0	166.8	5	0	4	4.4	0.0	3.3
17	Q9H4L7	SWI/SNF-related matrix-associated actin-dependent regulator of chromatin subfamily A containing DEAD/H box 1 OS=Homo sapiens GN=SMARCAD1 PE=1 SV=2	197.4	0.0	248.3	5	0	7	5.0	0.0	8.6
18	Q76FK4	Nucleolar protein 8 OS=Homo sapiens GN=NOL8 PE=1 SV=1	238.1	0.0	172.5	5	0	4	4.4	0.0	3.4
19	O15042	U2 snRNP-associated SURP motif-containing protein OS=Homo sapiens GN=U2SURP PE=1 SV=2	299.7	0.0	70.8	5	0	1	5.9	0.0	0.8
20	Q14152	Eukaryotic translation initiation factor 3 subunit A OS=Homo sapiens GN=EIF3A PE=1 SV=1	161.4	0.0	66.6	4	0	2	4.1	0.0	1.8
21	Q86UP2	Kinectin OS=Homo sapiens GN=KTN1 PE=1 SV=1	126.0	0.0	401.3	4	0	9	3.3	0.0	9.1
22	Q9BXW9	Fanconi anemia group D2 protein OS=Homo sapiens GN=FANCD2 PE=1 SV=1	151.3	0.0	226.1	4	0	5	3.9	0.0	5.0
23	P06733	Alpha-enolase OS=Homo sapiens GN=ENO1 PE=1 SV=2	194.6	0.0	71.8	4	0	2	10.8	0.0	8.5
24	Q9H2P0	Activity-dependent neuroprotector homeobox protein OS=Homo sapiens GN=ADNP PE=1 SV=1	130.3	0.0	224.6	3	0	4	3.7	0.0	5.3
25	P52701	DNA mismatch repair protein Msh6 OS=Homo sapiens GN=MSH6 PE=1 SV=2	146.5	0.0	450.5	3	0	11	2.3	0.0	8.4
26	Q96R06	Sperm-associated antigen 5 OS=Homo sapiens GN=SPAG5 PE=1 SV=2	104.2	0.0	56.8	3	0	1	3.1	0.0	1.3
27	Q86VI3	Ras GTPase-activating-like protein IQGAP3 OS=Homo sapiens GN=IQGAP3 PE=1 SV=2	245.1	0.0	233.5	3	0	5	2.7	0.0	4.1
28	O95104	Splicing factor, arginine/serine-rich 15 OS=Homo sapiens GN=SCAF4 PE=1 SV=3	152.2	0.0	122.8	3	0	2	3.6	0.0	3.1
29	Q10570	Cleavage and polyadenylation specificity factor subunit 1 OS=Homo sapiens GN=CPSF1 PE=1 SV=2	198.6	0.0	104.9	3	0	2	2.7	0.0	1.9
30	Q9ULH1	Arf-GAP with SH3 domain, ANK repeat and PH domain-containing protein 1 OS=Homo sapiens GN=ASAP1 PE=1 SV=4	122.6	0.0	116.7	3	0	2	2.8	0.0	2.1
31	Q9UDY2	Tight junction protein ZO-2 OS=Homo sapiens GN=TJP2 PE=1 SV=2	115.5	0.0	276.3	3	0	7	2.7	0.0	9.0
32	P04792	Heat shock protein beta-1 OS=Homo sapiens GN=HSPB1 PE=1 SV=2	90.1	0.0	76.6	2	0	2	13.2	0.0	8.3
33	Q7Z3K3	Pogo transposable element with ZNF domain OS=Homo sapiens GN=POGZ PE=1 SV=2	122.5	0.0	372.3	2	0	8	2.3	0.0	7.6
34	Q8TF66	Leucine-rich repeat-containing protein 15 OS=Homo sapiens GN=LRRC15 PE=1 SV=2	109.6	0.0	276.9	2	0	7	2.8	0.0	14.3
35	Q09028	Histone-binding protein RBBP4 OS=Homo sapiens GN=RBBP4 PE=1 SV=3	61.8	0.0	61.7	2	0	1	4.7	0.0	1.9
36	P01040	Cystatin-A OS=Homo sapiens GN=CSTA PE=1 SV=1	73.7	0.0	131.2	2	0	3	30.6	0.0	52.0
37	P78347	General transcription factor II-I OS=Homo sapiens GN=GTF2I PE=1 SV=2	47.6	0.0	47.5	2	0	1	1.8	0.0	0.9
38	Q9H0E9	Bromodomain-containing protein 8 OS=Homo sapiens GN=BRD8 PE=1 SV=2	100.9	0.0	122.7	2	0	3	1.9	0.0	4.0
39	Q5SRE5	Nucleoporin NUP188 homolog OS=Homo sapiens GN=NUP188 PE=1 SV=1	64.5	0.0	246.2	2	0	5	1.2	0.0	3.3
40	P26640	Valine--tRNA ligase OS=Homo sapiens GN=VARS PE=1 SV=4	84.5	0.0	191.2	2	0	4	2.0	0.0	3.7
41	P60174	Triosephosphate isomerase OS=Homo sapiens GN=TPI1 PE=1 SV=3	62.2	0.0	94.4	1	0	1	4.2	0.0	5.2
42	Q00341	Vigilin OS=Homo sapiens GN=HDLBP PE=1 SV=2	49.7	0.0	249.5	1	0	5	0.9	0.0	5.8
43	Q96QV6	Histone H2A type 1-A OS=Homo sapiens GN=HIST1H2AA PE=1 SV=3	141.5	0.0	185.4	1	0	1	17.6	0.0	17.6
44	Q7Z478	ATP-dependent RNA helicase DHX29 OS=Homo sapiens GN=DHX29 PE=1 SV=2	62.4	0.0	109.8	1	0	2	0.9	0.0	1.5
45	Q13045	Protein flightless-1 homolog OS=Homo sapiens GN=FLII PE=1 SV=2	60.6	0.0	85.1	1	0	2	0.8	0.0	1.9
46	O76013	Keratin, type I cuticular Ha6 OS=Homo sapiens GN=KRT36 PE=1 SV=1	180.7	0.0	149.0	1	0	1	1.9	0.0	1.9
47	Q15323	Keratin, type I cuticular Ha1 OS=Homo sapiens GN=KRT31 PE=2 SV=3	258.3	0.0	573.9	1	0	10	3.6	0.0	19.2
48	P01625	Ig kappa chain V-IV region Len OS=Homo sapiens PE=1 SV=2	48.4	0.0	57.3	1	0	2	6.1	0.0	14.0
49	O94822	E3 ubiquitin-protein ligase listerin OS=Homo sapiens GN=LTN1 PE=1 SV=6	60.0	0.0	217.2	1	0	6	0.8	0.0	3.7
50	O43491	Band 4.1-like protein 2 OS=Homo sapiens GN=EPB41L2 PE=1 SV=1	58.3	0.0	134.6	1	0	3	1.6	0.0	3.8
51	Q66K74	Microtubule-associated protein 1S OS=Homo sapiens GN=MAP1S PE=1 SV=2	57.2	0.0	52.8	1	0	1	1.4	0.0	1.4
52	Q9Y657	Spindlin-1 OS=Homo sapiens GN=SPIN1 PE=1 SV=3	55.5	0.0	65.2	1	0	1	3.8	0.0	3.8
