# Supplementary material for: The cell proliferation antigen Ki-67 organises heterochromatin
Source: eLife. 2016 Mar 7;5:e13722. doi: 10.7554/eLife.13722 (PMC4841783; doi:10.7554/eLife.13722)
Supplement: Figure 8—source data 1. — Table showing statistically significant (corrected p value < 0.02, Fold-change >1.5) changes of transcript abundance from Agilent Gene chip analysis of cDNA from control U2OS (pGIPZ-shRNA non silencing control) and U2OS stably silenced (pGIPZ-Ki-67 shRNA) for Ki-67. DOI: http://dx.doi.org/10.7554/eLife.13722.033 [file elife-13722-fig8-data1.xls]

## Sheet: U2OS shRNA Ki-67 vs CTRL p<0.02
ProbeName	p (Corr)	p	Regulation	FC (abs)	GeneSymbol	Description	Sequence
A_23_P137543	0.006466237	4.458733E-5	up	2.219584	ZNF362	Homo sapiens zinc finger protein 362 (ZNF362), mRNA [NM_152493]	ACTCCCTGTAAATACGCTGTTATACATACTGTTAACACCCCTTTGCTTTTTCTATGGGAC
A_23_P101392	0.0028666416	9.540461E-6	up	1.6125014	TMEM38A	Homo sapiens transmembrane protein 38A (TMEM38A), mRNA [NM_024074]	TTCACAGAATCCTGGCAGCAGCTCCAGTCAAGAATGTCACTGGTTGGCATGATATTCTTA
A_24_P303080	0.013577457	1.9739047E-4	up	1.7875336	MFSD8	Homo sapiens major facilitator superfamily domain containing 8 (MFSD8), mRNA [NM_152778]	AGCCCACTGACTGGAGCTTTTGTCTTAGCATAATAACCTGTTTCCAGCAAGAATATAACA
A_33_P3525263	0.009200237	9.302773E-5	up	3.8337784	A2ML1	Homo sapiens alpha-2-macroglobulin-like 1 (A2ML1), transcript variant 1, mRNA [NM_144670]	AAAGTGTGCTGGTCACCAACTTGAAACCAGCAACCATCAAGGTCTATGACTACTACCTAC
A_23_P203920	0.005981273	3.8221067E-5	up	2.8107107	SSPN	Homo sapiens sarcospan (SSPN), transcript variant 1, mRNA [NM_005086]	AATGTTTTGATTTGCTTTAAAAATGGCCTTCCTACACATTAGCTCCAGCTAAAAAGACAC
A_23_P10182	0.019340968	3.654986E-4	up	1.3817533	ACOX2	Homo sapiens acyl-CoA oxidase 2, branched chain (ACOX2), mRNA [NM_003500]	GGAGATCCAAGCTATGAAATAACCAACAGTATTCAAGAAGCAACCAGCACCATCATGTGA
A_19_P00331796	0.012737	1.7363873E-4	up	4.5363574			ATGAAGGAGATCATCAGCAATCAAGGTCAAATTTGTACCCCCTGGCAACTACCTTCCTGA
A_33_P3351264	0.006022679	3.907062E-5	up	4.8682747	OVOL3	Homo sapiens ovo-like zinc finger 3 (OVOL3), mRNA [NM_001270948]	TGTTGTGGCAAGGGCTTTCATGACGCCTTCGATCTCAAGCGCCACATGAGGACTCACACT
A_23_P103110	0.00906995	9.00508E-5	down	2.1734319	MAFF	Homo sapiens v-maf avian musculoaponeurotic fibrosarcoma oncogene homolog F (MAFF), transcript variant 1, mRNA [NM_012323]	CTCCCTGGGAAAAGTGGCGTATGGCCCTGAGCTGGGCTTTATATTTTATATCTGCAAATA
A_33_P3352467	0.00965271	1.0209706E-4	up	2.8211935	SSTR2	Homo sapiens somatostatin receptor 2 (SSTR2), mRNA [NM_001050]	AAGGGGACTTTAGAGGACTTCATACAAAGCTGGGCATTAAGAAAACCACAATGCATGGCC
A_33_P3271121	0.0019559204	3.6312256E-6	up	1.4968696			CCTGCTTATTCTTTCCAAGTTAGTAGGCAGATTGGAACTATAGAATTTATCCGTGATAAT
A_23_P44857	0.014513954	2.2657154E-4	up	4.904235		T cell receptor alpha variable 26-1 [Source:HGNC Symbol;Acc:12123] [ENST00000390455]	ATCATTCATGGTCTAAAAAACAATGAAACCAATGAAATGGCCTCTCTGATCATCACAGAA
A_23_P136405	6.965165E-4	2.2919804E-7	down	2.1610968	PDCD1	Homo sapiens programmed cell death 1 (PDCD1), mRNA [NM_005018]	GCTGGGACAAGGGATCCCCCTTCCCTGTGGTTCTATTATATTATAATTATAATTAAATAT
A_23_P110504	0.01610086	2.7058678E-4	down	1.5312439	CLPTM1L	Homo sapiens CLPTM1-like (CLPTM1L), mRNA [NM_030782]	CTGCCGCCAGCCAAGTGCAACTTGAATTGTCAATGAGTATTTTTGGAAGCATTTGGAGGA
A_32_P405902	0.0040967725	1.8873368E-5	up	3.6280699	C21orf15	Homo sapiens chromosome 21 open reading frame 15 (C21orf15), long non-coding RNA [NR_026755]	TTCATGTGATAAAATGAAACAATTGCTCACACTGATCTCCTGGGATCTCTACTAAGATGT
A_23_P214821	0.012773252	1.759648E-4	down	3.1240795	EDN1	Homo sapiens endothelin 1 (EDN1), transcript variant 1, mRNA [NM_001955]	AGGCGCCTGGCACATTTCAGGGAGAAACTCCAAAGTCCACACAAAGATTTTCTAAGGAAT
A_33_P3704738	0.019703234	3.8114376E-4	up	2.986648	FAM74A1	Homo sapiens family with sequence similarity 74, member A1 (FAM74A1), long non-coding RNA [NR_026803]	AGAAACTCAGAGACTGTCCCGGAGAAGACATGGAAACAGCTCAGACGCTGTCTGCAAGAA
A_23_P134454	0.018721985	3.4720052E-4	down	1.5327812	CAV1	Homo sapiens caveolin 1, caveolae protein, 22kDa (CAV1), transcript variant 1, mRNA [NM_001753]	ATTCCTCCTGCTCATATTGTGATTCTCACTTTGGGGACTTTTCTTAAACCTTCAGTTATG
A_33_P3794109	0.010847126	1.2594853E-4	up	1.9726774	LOC253805	Homo sapiens hypothetical protein LOC253805, mRNA (cDNA clone IMAGE:4824622). [BC028622]	CTTTTTAGGCCTCTTCTCAGCACACTGTTCCAACCAAAATTGATCTAATAAACGTATTTA
A_33_P3380383	0.013391449	1.9105911E-4	up	2.6981933	TIFAB	Homo sapiens TRAF-interacting protein with forkhead-associated domain, family member B (TIFAB), mRNA [NM_001099221]	AACAATTACATTTGTGGTAGCTTGGGGTTACCTTCAGCTTTCAAATACCCACAGGCACGC
A_33_P3273457	0.013375235	1.905134E-4	up	3.0486667	SPATA21	spermatogenesis associated 21 [Source:HGNC Symbol;Acc:28026] [ENST00000375577]	AGACTCAGAGATGCATTTGAGAAGGGGCCTTCAGAGCTCAGAATCCAGGAGCAGGGGCCT
A_23_P103877	6.8328035E-4	1.7666198E-7	down	3.2948544	LRRC38	Homo sapiens leucine rich repeat containing 38 (LRRC38), mRNA [NM_001010847]	ATATAATAGGCCTCAGCAACCTTGGGATGTTATACTGGGAACTAATAAACTCGTGTGCAA
A_24_P50801	0.008741221	8.443956E-5	up	1.8247569	NRP2	Homo sapiens neuropilin 2 (NRP2), transcript variant 6, mRNA [NM_201264]	AGCCCGGTGAGGAGTGGCTTCAGGTAGATCTGGGAACACCCAAGACAGTGAAAGGTGTCA
A_24_P280846	0.0014013432	2.0967218E-6	up	2.3447666	GOLT1A	Homo sapiens golgi transport 1A (GOLT1A), mRNA [NM_198447]	CTCGGCATGTTCCTGGAAACCTACGGATTCTTCAGCCTCTTTAAGGGCTTTTTCCCTGTC
A_33_P3398406	0.007730183	6.504655E-5	up	4.06032	GLP2R	Homo sapiens glucagon-like peptide 2 receptor (GLP2R), mRNA [NM_004246]	AACAAATGGGAATAAGAAAATCTGGTGGATCATCCGAGGACCCATGATGCTCTGTGTAAC
A_19_P00332432	0.0060416316	3.9549726E-5	up	4.046001		602285130F1 NIH_MGC_86 Homo sapiens cDNA clone IMAGE:4372734 5', mRNA sequence [BG112755]	GCTACCTGTTAAAATTCACCCTGTACTCTTGAAAGCAAACGTGCATCTAAATAAACTAAA
A_23_P106682	0.017478684	3.1264022E-4	down	1.3707379	EMP2	Homo sapiens epithelial membrane protein 2 (EMP2), mRNA [NM_001424]	TTCCGGAGCTGGGTTGCTTCTGCTGCAGTACAGAATCCACATTCAGATAACCATTTTGTA
A_23_P73526	0.0085312715	7.9855614E-5	up	1.4360032	CITED1	Homo sapiens Cbp/p300-interacting transactivator, with Glu/Asp-rich carboxy-terminal domain, 1 (CITED1), transcript variant 1, mRNA [NM_004143]	CAAGGCTCTGAAATGCCAACAACGTCGAGGCCTGCACTTGATGTCAAGGGTGGCACCTCA
A_33_P3537861	0.015405674	2.5093742E-4	up	3.0802736	LOC100126448	Homo sapiens isolate HA_003373 chromosome X unknown mRNA. [EF565113]	GGGGCCAAAAACTTAGGCATAAATAGTGTTTTCCATTACTTCAAAATACCATCAATCACA
A_33_P3281985	0.0073173423	5.9033966E-5	up	3.404183	CR2	Homo sapiens complement component (3d/Epstein Barr virus) receptor 2 (CR2), transcript variant 1, mRNA [NM_001006658]	GTACAATTCAGGCTTTGGATGTTTCTTTAGCAGTTTTGTGATAAGTTCTAGTTGCTTGTA
A_33_P3214570	0.016796306	2.8732888E-4	up	2.0468714	XLOC_014512	BROAD Institute lincRNA (XLOC_014512), lincRNA [TCONS_l2_00020436]	AACCTGACACAATGGAGTCACAAAAAGCATGTGTCAAATGAATGAATAAAGAATCAGCAC
A_23_P159956	0.016796306	2.8740652E-4	up	1.2098325	MID2	Homo sapiens midline 2 (MID2), transcript variant 1, mRNA [NM_012216]	TGGGATGAAAACCTGTCATTAAGTTTCAGGAGAGTATATAATTCACTGGCTCTCTAGTTC
A_23_P106391	0.016960222	2.948084E-4	down	1.3350369	THAP10	Homo sapiens THAP domain containing 10 (THAP10), mRNA [NM_020147]	GTACCATGAAGTAAACTGTTACAATAGTTTCTGAGAAGCATACTATAACTCTGATCTTCC
A_23_P120002	0.005152257	2.9537316E-5	down	1.6127547	SP110	Homo sapiens SP110 nuclear body protein (SP110), transcript variant b, mRNA [NM_004510]	AAGGAACGCAAAGAACTGGAAACGGAATATACGTTGTGAAGGAATGACCCTAGGAGAGCT
A_23_P171095	0.0073173423	5.8906997E-5	up	2.0665793	USP27X	Homo sapiens ubiquitin specific peptidase 27, X-linked (USP27X), mRNA [NM_001145073]	CTGTTTTCATTTCAAACGGTTTGAACATTCAGCGAAACAGAGGCGCAAGATCACTACATA
A_23_P30315	0.0022317343	4.5112033E-6	up	2.427807	TRIM7	Homo sapiens tripartite motif containing 7 (TRIM7), transcript variant 6, mRNA [NM_033342]	CGTAACATACCAGTTAGGGCCTGCGGAAGCATCTTGTAATGGAACACATTACTATTTCTG
A_24_P304154	0.010340965	1.1691161E-4	down	1.984189	AMPD3	Homo sapiens adenosine monophosphate deaminase 3 (AMPD3), transcript variant 3, mRNA [NM_001025390]	AAAGCATTTTTAAAGATTAATCTGAATTAAGCTTTATCAGTGTACTCTTTATCTGTGTTA
A_23_P204847	0.0057891305	3.6448822E-5	down	1.7524626	LCP1	Homo sapiens lymphocyte cytosolic protein 1 (L-plastin) (LCP1), mRNA [NM_002298]	ACGCCCTCTATCATGGTGAAAAGCTCCATCAATGAGGTATCTTCTTTAGTGGTGGTATGT
A_33_P3346826	9.4151637E-4	7.081566E-7	up	2.9707968	IL32	Homo sapiens interleukin 32 (IL32), transcript variant 4, mRNA [NM_001012633]	AGAAAGAGATGGATTACGGTGCCGAGGCAACAGATCCCCTGTCCCGGATGTTGAGGATCC
A_19_P00315502	0.0054515474	3.2418415E-5	up	1.656396		RASH_MSVHA (P01115) Transforming protein p29 precursor [Contains: Transforming protein p21], partial (6%) [THC2657193]	AGCCGGGATCGGGTTGTTGTTAATTTCTTAAGCAATTTCTAAATTCTGTATTGACTCTCT
A_33_P3349506	0.010393537	1.1804614E-4	up	4.736576		PREDICTED: Homo sapiens ovostatin 2 (OVOS2), transcript variant X2, misc_RNA [XR_253040]	ATGAAGCAAGTTTTTCTAAGACCCTCTCAAGGAAAAATTCAAAGGCCAAGCTTGCCCCGG
A_33_P3329013	0.012563814	1.6950592E-4	up	2.0739934	SSTR2	Homo sapiens somatostatin receptor 2 (SSTR2), mRNA [NM_001050]	CAAAGTCTGGAGAAGAGGGATCATGCCTGGATATGATCTTTAGAAACAACAAAAATAGAA
A_33_P3413701	0.010165504	1.124279E-4	up	1.2995155	ERAP1	Homo sapiens endoplasmic reticulum aminopeptidase 1 (ERAP1), transcript variant 2, mRNA [NM_001040458]	GAAAAGCCCATTTTCTAAACAGATACAATATTGCCACAACAATGTGCAGAAACCTTTTTG
A_24_P173754	0.0050033056	2.8106477E-5	down	1.3785583	C1orf21	Homo sapiens chromosome 1 open reading frame 21 (C1orf21), mRNA [NM_030806]	AAAGCCAACAAGAATTCTTCAGAATGCTGGATGAAAAAATTGAAAAGGGTCGGGATTACT
A_23_P87150	0.003969394	1.7033342E-5	down	2.0019047	LPXN	Homo sapiens leupaxin (LPXN), transcript variant 2, mRNA [NM_004811]	AAATTTAAACCAAGAGAGGAGAGGAAAGGGTAAATTTTCTGTTACTGACCTTCTGCTTAA
A_23_P426989	0.008247388	7.4244905E-5	down	1.8950375	SH3BP5L	Homo sapiens SH3-binding domain protein 5-like (SH3BP5L), mRNA [NM_030645]	AAGATGGAGTGCTCTTTTCTAGGCCCATGTTCTGCCAGCAACCGGGATGCGTGGGCAACT
A_32_P213091	0.0026611327	6.1978676E-6	down	3.2683294	SHISA9	Homo sapiens shisa family member 9 (SHISA9), transcript variant 2, mRNA [NM_001145205]	TTCTTAGGCATTTGTGTGGCTTGGAGCACATAGTTGGTTCTTTCTACTGTCTAATTCATT
A_24_P12626	0.0015417772	2.4357466E-6	down	1.5926138	CAV1	Homo sapiens caveolin 1, caveolae protein, 22kDa (CAV1), transcript variant 1, mRNA [NM_001753]	TTGACTTTGAAGATGTGATTGCAGAACCAGAAGGGACACACAGTTTTGACGGCATTTGGA
A_24_P178444	0.004301604	2.163693E-5	down	1.1568264			CTGAGCTGGTGTATACTGGTTTCTGGCTTTCCGGCACAGCCCTGAGTGTGAATTTGTCCG
A_23_P257895	0.008592125	8.098348E-5	down	1.3943533	MAPK1	Homo sapiens mitogen-activated protein kinase 1 (MAPK1), transcript variant 2, mRNA [NM_138957]	GCCGAAGCACCATTCAAGTTCGACATGGAATTGGATGACTTGCCTAAGGAAAAGCTCAAA
A_23_P55477	0.015016012	2.3964913E-4	up	1.3033352	ADORA2B	Homo sapiens adenosine A2b receptor (ADORA2B), mRNA [NM_000676]	TTATGATCTATTCAGCTGCTTTTACTGTGTGGATTATGCCAACAGCTTGAATGGATTCTA
A_23_P112103	0.018822677	3.499527E-4	up	1.3755107	GSDMD	Homo sapiens gasdermin D (GSDMD), transcript variant 1, mRNA [NM_024736]	AGAGGTGGAGACCATCTCCAAGGAACTGGAGCTTTTGGACAGAGAGCTGTGCCAGCTGCT
A_24_P335092	0.010242903	1.1411766E-4	down	1.4248886	SAA1	Homo sapiens serum amyloid A1 (SAA1), transcript variant 1, mRNA [NM_000331]	CAGAAGCGATCAGCGATGCCAGAGAGAATATCCAGAGATTCTTTGGCCATGGTGCGGAGG
A_23_P368691	0.012023547	1.5536454E-4	down	1.7725952	ABCC9	Homo sapiens ATP-binding cassette, sub-family C (CFTR/MRP), member 9 (ABCC9), transcript variant SUR2A, mRNA [NM_005691]	ATTCTGCAGGATCCAATACTATTCAGTGGTTCCATTAGATTTAATTTAGATCCAGAGTGC
A_33_P3279119	0.017390113	3.095563E-4	down	1.368539		MGC5.5.1.1.1.G05.R.1 NIH_MGC_331 Homo sapiens cDNA clone MGC5.5.1.1.1.G05, mRNA sequence [DR007930]	AGCAGCAGCCAGATGGGCATTGTCATTCTGTAGCAGGATGTTGGCATTGTCCACGGTGGC
A_23_P104318	0.015102193	2.431696E-4	up	2.999295	DDIT4	Homo sapiens DNA-damage-inducible transcript 4 (DDIT4), mRNA [NM_019058]	TCGTGGAGGTGGTTTGTGTATCTTACTGGTCTGAAGGGACCAAGTGTGTTTGTTGTTTGT
A_33_P3289296	0.0092396755	9.439906E-5	up	2.119076	TMEM37	Homo sapiens transmembrane protein 37 (TMEM37), mRNA [NM_183240]	AGCACGTCTGTACTTCTGTTCATTAAAGTGCTCCCTTTCTAGTCCTTTTTCTGCCCAGAA
A_23_P123393	0.0026611327	6.6500415E-6	up	1.5135726	KCNQ3	Homo sapiens potassium voltage-gated channel, KQT-like subfamily, member 3 (KCNQ3), transcript variant 1, mRNA [NM_004519]	CTTCCAATAAGCCCATTTAAAAGAGGTCACTGGCTGACCCCTCCTTGTAATGTAGACAGA
A_23_P205428	0.013842091	2.0692372E-4	up	5.250477	FOXG1	Homo sapiens forkhead box G1 (FOXG1), mRNA [NM_005249]	TTAACGATTGCCTTCAGTTTGTGTTGTGTATATTTTGATGTATGTGGTCACTAACAGGTC
A_24_P301547	0.009450322	9.9290024E-5	up	1.2249681	C17orf80	Homo sapiens chromosome 17 open reading frame 80 (C17orf80), transcript variant 1, mRNA [NM_017941]	TTCCGAGGGAGACGACTTACCAGTTTCATTCTGTATCGCAGTCAAGTAGTCAAAGTCTTG
A_23_P117727	0.012325222	1.6495762E-4	up	1.1856476	MTFMT	Homo sapiens mitochondrial methionyl-tRNA formyltransferase (MTFMT), mRNA [NM_139242]	TTAACAGTTCAGTCCTTGCTGATCCAAAATTAACGGGACAGGCTCTTATTCCAGGATCAG
A_23_P147786	0.0011350205	1.370583E-6	down	2.49064	RIMS2	Homo sapiens regulating synaptic membrane exocytosis 2 (RIMS2), transcript variant 2, mRNA [NM_014677]	GATGAACTAGAGCTATCCAATATGGTGATTGGATGGTTCAAACTTTTCCCACCTTCCTCC
A_33_P3291636	0.011524026	1.4247591E-4	down	1.4200857	ZNF74	Homo sapiens zinc finger protein 74 (ZNF74), transcript variant 1, mRNA [NM_003426]	ATCCAGTTCAACAAACACCTGCTCAGCACATACTACGTGCCTGGCAGCCTGCTGGGTGCA
A_23_P68899	0.013577457	1.9710348E-4	down	1.2668254	TXN2	Homo sapiens thioredoxin 2 (TXN2), mRNA [NM_012473]	AATGGGGACGTGGTGGACAAGTTTGTGGGCATCAAGGATGAGGATCAGTTGGAGGCCTTC
A_24_P416645	0.010302448	1.15265364E-4	down	2.6022837	KLK13	Homo sapiens kallikrein-related peptidase 13 (KLK13), mRNA [NM_015596]	ATGTGCCAACATCCAACTTCGCTCAGATGAGGAGTGTCGTCAAGTCTACCCAGGAAAGAT
A_23_P1833	0.004497114	2.293745E-5	up	2.9207556	B3GAT1	Homo sapiens beta-1,3-glucuronyltransferase 1 (glucuronosyltransferase P) (B3GAT1), transcript variant 2, mRNA [NM_054025]	ACTTCTTTGGGCAGATGCTAGGTCAGTTGTTTTCACCTAATATCCTCTTTTAGCTGCATG
A_23_P113701	0.0042243116	2.0726375E-5	down	1.4264705	PDGFA	Homo sapiens platelet-derived growth factor alpha polypeptide (PDGFA), transcript variant 1, mRNA [NM_002607]	GTTTACCTAATATTACCTGTTTTGTATACCTGAGAGCCTGCTATGTTCTTCTTTTGTTGA
A_23_P397376	0.015102193	2.4281269E-4	down	1.4716738	MAF	Homo sapiens v-maf avian musculoaponeurotic fibrosarcoma oncogene homolog (MAF), transcript variant 2, mRNA [NM_001031804]	ATTATTATTATTTGCAGTCATGGAGAACCACCTACCCCTGACTTCTGTTTAGTCTCCTTT
A_33_P3343066	0.010165504	1.124972E-4	up	2.5806215	PAX2	Homo sapiens paired box 2 (PAX2), transcript variant c, mRNA [NM_003988]	CCACTTTCAGTGCGTCGGTTCGTTTTGATTCTTTTTCTTTTGTGCACATAAGAAATAAAT
A_24_P278299	0.014861254	2.3613134E-4	up	1.329168	ASB13	Homo sapiens ankyrin repeat and SOCS box containing 13 (ASB13), transcript variant 1, mRNA [NM_024701]	TTGTCATGGCGGGTCTTCGTCCTAAACTGAGAAGAAAAGCATTCCTGTTTGATCACCGCC
A_23_P10442	0.017776797	3.1922606E-4	up	1.3804076	OSBPL1A	Homo sapiens oxysterol binding protein-like 1A (OSBPL1A), transcript variant 2, mRNA [NM_080597]	GCACATTCATCTTAAATCTTATAGTATTTATCCACCCAAACCCCAGACTGAGATACTGCT
A_23_P325661	0.00606246	4.0326155E-5	down	1.6220201	ZNF134	Homo sapiens zinc finger protein 134 (ZNF134), mRNA [NM_003435]	TGCTGGTGGCTTATACAAAAAGTTTACTTTCTTCATGGATATTCTTGGTCTCACATACTT
A_33_P3257518	0.004595713	2.4088471E-5	down	2.7906857	FLJ22447	Homo sapiens uncharacterized LOC400221 (FLJ22447), long non-coding RNA [NR_039985]	GTTGAACAGCACTAATTTTTTCACTTGGAGCTAGCACATGTTTATGACTAGTACAAGTTT
A_33_P3420635	0.01948089	3.695659E-4	down	1.5597202	OR4D6	Homo sapiens olfactory receptor, family 4, subfamily D, member 6 (OR4D6), mRNA [NM_001004708]	TCATTACCCCCATGCTGAACCCCATCATCTATTCCCTGAGAAATCAAGAGATGAAGTCAG
A_33_P3332126	0.012793136	1.7771167E-4	up	1.2141013	SCLY	selenocysteine lyase [Source:HGNC Symbol;Acc:18161] [ENST00000409736]	ACCCCAATGATTGCTGGCCTTGGGAAGGTGAGCCCTGGTGAGCTTGAGGAGATGAGTTGA
A_23_P117506	0.008342885	7.53007E-5	up	1.7117878	DHRS7	Homo sapiens dehydrogenase/reductase (SDR family) member 7 (DHRS7), mRNA [NM_016029]	CTGGAGAAGTCACAAAGACTATAGGCAATAATGGAGACCAGTCCCACAAGATGACAACCA
A_23_P1505	0.006752413	4.9459344E-5	up	1.3340002	LRP5	Homo sapiens low density lipoprotein receptor-related protein 5 (LRP5), mRNA [NM_002335]	TGGAAGGCCAGCAAGTACTACCTGGATTTGAACTCGGACTCAGACCCCTATCCACCCCCA
A_23_P216610	0.009191336	9.26803E-5	down	1.3375951	SUSD1	Homo sapiens sushi domain containing 1 (SUSD1), transcript variant 2, mRNA [NM_022486]	AATTAGTTGATATACTAATGAGAAAATATACTAGCCTGGCCATGCCAATAAGTTTCCTGC
A_33_P3663974	4.876452E-4	1.08364546E-7	down	3.7078664	THRB	Homo sapiens thyroid hormone receptor, beta (THRB), transcript variant 4, mRNA [NM_001252634]	TTACCGAAAACACCACGTGACACACTTTTGGCCAAAACTCCTGATGAAGGTGACAGATCT
A_23_P135990	0.0060619684	4.01804E-5	down	2.0721307	SLCO2A1	Homo sapiens solute carrier organic anion transporter family, member 2A1 (SLCO2A1), mRNA [NM_005630]	TGTTACAGACAAGCTTATTTCCAAAGCCACCTCATTTCCAAACATCTCACTCAGGAAGGG
A_24_P887857	0.0011095619	1.225747E-6	down	1.9238266			ATGAGTAGTACGAGAAGATGGCAGAGAAGAACCGCAAGGATGCCAAGGATTGGTTCTTCA
A_33_P3366221	0.014274331	2.1812944E-4	down	1.8393309	NTNG1	Homo sapiens netrin G1 (NTNG1), transcript variant 3, mRNA [NM_014917]	GATTTCTTTACAGTCACAGACCTGAGGATAAGGCTGTTAAGACCAGCCGTTGGGGAAATA
A_33_P3227472	0.0012204754	1.6384594E-6	up	1.6913245	SDSL	Homo sapiens serine dehydratase-like (SDSL), mRNA [NM_138432]	CTCCTGGACTGCTTCTTTTGGCTCTCCGACAACTCCGGCCAATAAACACTTTCTGAATTG
A_23_P7083	0.010393537	1.17941025E-4	down	1.9776614	CTBP1-AS2	Homo sapiens CTBP1 antisense RNA 2 (head to head) (CTBP1-AS2), long non-coding RNA [NR_033339]	TGGGAACGTCGATGAGGTATTAAAGGAAACCACTGGTCTTGTCAGTCATGTACACACAGA
A_33_P3324206	0.013675174	2.0185707E-4	down	1.4452542	HR	Homo sapiens hair growth associated (HR), transcript variant 1, mRNA [NM_005144]	GAAAAACACTCCCACTCTTGTCATACCTAATTGTTCCTGCTGTGGTTTGGGGAATTTTTT
A_33_P3299525	0.013347077	1.8934793E-4	up	1.9446139	KCTD21	Homo sapiens potassium channel tetramerization domain containing 21 (KCTD21), mRNA [NM_001029859]	CTCACAGGGCTGTTGTGAGGATCAAATGAAATAATGTAACGTGAGAATACAGTATAAATG
A_23_P160214	0.013842091	2.057172E-4	up	2.07207	TTC39A	Homo sapiens tetratricopeptide repeat domain 39A (TTC39A), transcript variant 2, mRNA [NM_001080494]	AGAGAATGTATGAACAGTTTACATTTTCCTTAGAAATACATTGATGGGATCACAGTTGGC
A_19_P00805898	0.006497493	4.5052544E-5	up	3.3244586			TCAAATGGGAGTTCCAAGACCAGAGGAAACCTAGCCCAGAGCTTGAGTCTTCCAGGCTAA
A_24_P481824	0.014860679	2.3577291E-4	up	2.2436924	DPY19L4	Homo sapiens dpy-19-like 4 (C. elegans) (DPY19L4), mRNA [NM_181787]	GGAATATATATGACAATTATTTTCTGTACATTAATGTCTAAACATTATACTTACTTTTTC
A_23_P102582	0.016582936	2.8043936E-4	down	1.1565007	C20orf24	Homo sapiens chromosome 20 open reading frame 24 (C20orf24), transcript variant 1, mRNA [NM_018840]	TAAACTATCAATGGCATTTCAAGTCTTCTGAAACAGCATGGCTGTATGTGCGTGGTCCAT
A_23_P102681	0.00909149	9.0869464E-5	down	3.0590847		HCG1785561; MGC4294 protein; Uncharacterized protein [Source:UniProtKB/TrEMBL;Acc:Q9BU82] [ENST00000598340]	ACTGACAAATCGAGTGGGCAAACGGCTTACTCAAAGGCCAGGAGCAGCTACCCGATGACT
A_33_P3421913	0.012773252	1.7653478E-4	up	1.7018743	CADM1	Homo sapiens cell adhesion molecule 1 (CADM1), transcript variant 1, mRNA [NM_014333]	GTAAGAAACTCCATATCCATATGTTCCCATTCGCATTTTGTATTGGTTCATGTATACCAT
A_23_P67529	0.017784495	3.2020034E-4	down	1.8166881	KCNN4	Homo sapiens potassium intermediate/small conductance calcium-activated channel, subfamily N, member 4 (KCNN4), mRNA [NM_002250]	ACTCTCACTATGCTGCTATGGACGACCTCCAGCTCTCAGTTACAAGTGCAGGCGACTGGA
A_23_P48740	0.012773252	1.7625523E-4	down	3.580729	DIO2	Homo sapiens deiodinase, iodothyronine, type II (DIO2), transcript variant 1, mRNA [NM_013989]	GCCCATGTCACTGGTCAGCGTGGTTTTTATGTGTATTAGGATTGGGGGATGTGAAGAAAT
A_23_P114670	0.0073173423	5.902479E-5	up	1.2744628	ARHGEF16	Homo sapiens Rho guanine nucleotide exchange factor (GEF) 16 (ARHGEF16), mRNA [NM_014448]	ACAGGAGGCACCAATAGCGATTATTGGGGGCAATGCGAGGTCTCCTCCTATGCCCTTCCT
A_24_P889720	0.009366607	9.797016E-5	down	1.1988913	UBC	Homo sapiens ubiquitin C (UBC), mRNA [NM_021009]	AGGCATCCCTCCTGACCAGCAGAGGCTTGATCTTTGCTGGAAAACAGCTGGAAGATGGGC
A_23_P126416	0.00553397	3.31687E-5	down	2.5819025	TIE1	Homo sapiens tyrosine kinase with immunoglobulin-like and EGF-like domains 1 (TIE1), transcript variant 1, mRNA [NM_005424]	GTGAACATGTCGCTGTTTGAGAACTTCACTTACGCGGGCATTGATGCCACAGCTGAGGAG
A_33_P3351207	0.0080375755	7.046694E-5	up	1.6350172	MGC21881	Homo sapiens uncharacterized locus MGC21881 (MGC21881), long non-coding RNA [NR_015363]	CCCATTTTCTCACTTCCTGTTTGTGTGTCAAGGGGTATTAATAAATCTTTGCCTATTTAA
A_23_P104054	0.015387127	2.5027365E-4	down	1.3589352	SUCO	Homo sapiens SUN domain containing ossification factor (SUCO), transcript variant 2, mRNA [NM_016227]	TAAATTTCTTTCCTGTCTGCACAATTAGCTATTCAGAGCAAGAGGGCCTGATTTTATAGA
A_23_P115726	0.0010050808	8.504621E-7	up	2.0491872	SLC16A9	Homo sapiens solute carrier family 16, member 9 (SLC16A9), mRNA [NM_194298]	GGGATTTTATAAACCAATAGCCAAGTGTTCTTTAAATAGGAGGCACCCTTCCCATTGTGC
A_23_P106389	0.0041989214	1.973873E-5	down	1.5282742	SEMA7A	Homo sapiens semaphorin 7A, GPI membrane anchor (John Milton Hagen blood group) (SEMA7A), transcript variant 1, mRNA [NM_003612]	GCCTTGCATGTTTATTGAAGGATGTTTGCTTTCCGGACGGAAGGACGGAAAAAGCTCTAT
A_23_P88691	0.014860373	2.3536399E-4	up	1.2713766	CHRNA5	Homo sapiens cholinergic receptor, nicotinic, alpha 5 (neuronal) (CHRNA5), mRNA [NM_000745]	TAGCCCAGGTTCTTGATCGGATGTTTCTGTGGACTTTTCTTTTCGTTTCAATTGTTGGAT
A_24_P245838	0.0057891305	3.6466965E-5	up	3.5037606	MGAT3	Homo sapiens mannosyl (beta-1,4-)-glycoprotein beta-1,4-N-acetylglucosaminyltransferase (MGAT3), transcript variant 1, mRNA [NM_002409]	ACATTCTGAAATCATTTTCTCTGTAAATGGTTGGATTTCATTTCACCCTTAAAGGGATGC
A_24_P228130	0.005748168	3.580361E-5	down	3.1016557	CCL3L3	Homo sapiens chemokine (C-C motif) ligand 3-like 3 (CCL3L3), mRNA [NM_001001437]	TTCCACAGAATTTCATAGCTGACTACTTTGAGACGAGCAGCCAGTGCTCCAAGCCCAGTG
A_33_P3386099	0.0018725558	3.2838811E-6	down	1.2866099	ELK1	Homo sapiens ELK1, member of ETS oncogene family (ELK1), transcript variant 3, mRNA [NM_001257168]	TCATCTCCTGGACTTCACGGGATGGTGGTGAATTCAAGCTGGTGGATGCAGAGGAGGTGG
A_23_P129704	0.0038979617	1.6473643E-5	down	1.3597074	TERF2IP	Homo sapiens telomeric repeat binding factor 2, interacting protein (TERF2IP), mRNA [NM_018975]	AATGCTGTATTCATTTTGCTAACTTAGTATTTGGGTACCCTGCTCTTTGGCTGTTCTTTT
A_23_P109410	0.014447946	2.2397588E-4	down	1.3404223	THAP7	Homo sapiens THAP domain containing 7 (THAP7), transcript variant 1, mRNA [NM_030573]	CTTTGAGCTGGTGGGAATCAGTGGATATCACAGGCTAAAGGAGGGGGCAGTCCCCACCAT
A_23_P56759	0.0085312715	7.92942E-5	up	2.6944735	KRCC1	Homo sapiens lysine-rich coiled-coil 1 (KRCC1), mRNA [NM_016618]	GATATCCGTGTTCATACCACTTTTCTTATGTGAATAGGTTCTTTAACTTCTAACAAAGGC
A_23_P3371	0.016061658	2.6955045E-4	down	1.2879823	RASGRF1	Homo sapiens Ras protein-specific guanine nucleotide-releasing factor 1 (RASGRF1), transcript variant 1, mRNA [NM_002891]	TCTTTTGTAATGGATGAAGAAAGCCTCTACGAGTCTTCTCTCCGAATAGAACCAAAACTC
A_23_P93360	0.018189624	3.3008825E-4	down	1.2383442	AGER	Homo sapiens advanced glycosylation end product-specific receptor (AGER), transcript variant 1, mRNA [NM_001136]	CCCTTGAACTGTTCTGGCCTCAGACCAACTCTCTCCTGTATAATCTCTCTCCTGTATAAC
A_19_P00323375	0.016960222	2.96191E-4	up	1.899209	TTC28-AS1	Homo sapiens TTC28 antisense RNA 1 (TTC28-AS1), transcript variant 2, long non-coding RNA [NR_026962]	CCATGTTGATTATATGCACTTGGAATATTTCTTTTCCATCTGTGGATTGTTCTGTCACTT
A_32_P130788	0.006752413	4.8838217E-5	up	2.9711168	SAMD13	Homo sapiens sterile alpha motif domain containing 13 (SAMD13), transcript variant 1, mRNA [NM_001010971]	TAATTTGTTTCTGAAGAAATTTGCCGAGAGTTACAGGTCAAAAAGCCTTGTTACTAGTAC
A_23_P40059	0.012773252	1.7611172E-4	up	1.5199295	PMS1	Homo sapiens PMS1 postmeiotic segregation increased 1 (S. cerevisiae) (PMS1), transcript variant 1, mRNA [NM_000534]	GATCCTCGTCTTACAGCGAATGGTTTCAAGATAAAATTGATACCAGGAGTTTCAATTACT
A_33_P3276703	0.0034376325	1.2847187E-5	down	2.5319219	VGF	Homo sapiens VGF nerve growth factor inducible (VGF), mRNA [NM_003378]	CTCTGTTGTAAATACCCCTCACGGAGGAAATAGTTTTGCTAAGAAATAAAAGTGACTATT
A_24_P250227	0.0073173423	5.9336777E-5	down	1.3477917	NR1D1	Homo sapiens nuclear receptor subfamily 1, group D, member 1 (NR1D1), mRNA [NM_021724]	AACACATCCCGGGCTTCCGTGACCTTTCTCAGCATGACCAAGTCACCCTGCTTAAGGCTG
A_33_P3398897	9.4151637E-4	6.7709567E-7	up	1.1418872	QDPR	Homo sapiens quinoid dihydropteridine reductase (QDPR), mRNA [NM_000320]	GGAGGTCTTTTAATCTGATGTTCTCAGAAGGGGGTGGATTTAAATCCTGAAATAAATATT
A_33_P3384932	0.008805704	8.5894164E-5	up	1.6324304	NUDT8	Homo sapiens nudix (nucleoside diphosphate linked moiety X)-type motif 8 (NUDT8), transcript variant 1, mRNA [NM_001243750]	TGGCTTCACCCTGTCAGGCCAGCTCCACTCCAGGACTGAATAAAGGTCTTTGACAGCTCT
A_23_P325119	0.006386405	4.365007E-5	down	1.3338599	SNHG11	Homo sapiens small nucleolar RNA host gene 11 (non-protein coding) (SNHG11), long non-coding RNA [NR_003239]	CCTGGAGGGGCCTCCTCATGATTGTTTGGGGGTTGATCACAGACCAAGAGTGACGAGTGA
A_33_P3267186	0.0042243116	2.0413023E-5	down	1.617093	ATP2B1	Homo sapiens ATPase, Ca++ transporting, plasma membrane 1 (ATP2B1), transcript variant 2, mRNA [NM_001682]	ATACCTGAGGAGGAATTAGCAGAGGATGTTGAAGAGATTGATCACGCTGAAAGGGAGTTG
A_23_P141173	0.0052973805	3.100359E-5	down	3.281224	MPO	Homo sapiens myeloperoxidase (MPO), mRNA [NM_000250]	CCTGTTCTGGGTGCAGCTGAGAAAATGAGTGACTAGACGTTCATTTGTGTGCTCATGTAT
A_23_P387585	0.004287032	2.1362106E-5	up	1.568642	FAM226A	Homo sapiens family with sequence similarity 226, member A (non-protein coding) (FAM226A), long non-coding RNA [NR_026595]	TATAAAAAGATAAAATAAAAAGCCGGTCAGTGTCTGTTGCACAAAATTACAACCGCTCTC
A_23_P87011	8.632388E-4	4.3953466E-7	down	2.5864923	TAGLN	Homo sapiens transgelin (TAGLN), transcript variant 1, mRNA [NM_001001522]	ACCCGTGTGGTACCTTCAGCCCTGGCCAAGCTTTGAGGCTCTGTCACTGAGCAATGGTAA
A_33_P3252794	0.017096067	2.9999387E-4	up	1.5015112	GLI4	Homo sapiens GLI family zinc finger 4 (GLI4), mRNA [NM_138465]	GGTGGGCACTGCCCAGCACCGCATGCCACGTGTCCGGAATAAATTCTTTTTGATTGTTGG
A_33_P3347932	0.016960222	2.9547114E-4	up	1.2406669	HSF1	Homo sapiens heat shock transcription factor 1 (HSF1), mRNA [NM_005526]	TTGGATTTTTACACAACTGTCCCGTTCCCCGCTCCACAGAGATACACAGATATATACACA
A_33_P3347971	0.010328044	1.1628002E-4	up	1.621209	TPD52	Homo sapiens tumor protein D52 (TPD52), transcript variant 1, mRNA [NM_001025252]	GGTCTGCAAGTGCTTTTGCCTGCCAGGATTTTGTACTCAAATAAATGCTATTTGGCAACT
A_23_P200710	0.00812152	7.215735E-5	up	2.0656886	PIK3C2B	Homo sapiens phosphatidylinositol-4-phosphate 3-kinase, catalytic subunit type 2 beta (PIK3C2B), mRNA [NM_002646]	CGGTGAAACTTTTCCAGATGAACGGACCATAAATGTGTTACTGGCTTTGTGCCTGTAGCT
A_23_P65230	0.002052998	3.908634E-6	up	2.323532	TMTC4	Homo sapiens transmembrane and tetratricopeptide repeat containing 4 (TMTC4), transcript variant 1, mRNA [NM_032813]	AGAGGGCAACACATCTGTGTAAGCTGCTTTTTAGTGTGTTTATCTGAAGGCCGTTTTCCA
A_33_P3341499	0.00802308	7.0151276E-5	down	1.635432	WNT5A	Homo sapiens wingless-type MMTV integration site family, member 5A (WNT5A), transcript variant 1, mRNA [NM_003392]	GCATCTTAGACCATTTTTATATGCAGTGTACAATTTGCTGGGCTAGAAATGAGATAAAGA
A_23_P81898	0.0042243116	2.0479467E-5	up	4.0251026	UBD	Homo sapiens ubiquitin D (UBD), mRNA [NM_006398]	ATTTGGGTGGGATGGGTAGGATGAAGTATATTGCCCAACTCTATGTTTCTTTGATTCTAA
A_23_P5945	0.010165504	1.1209796E-4	down	1.2626324	DHX35	Homo sapiens DEAH (Asp-Glu-Ala-His) box polypeptide 35 (DHX35), transcript variant 1, mRNA [NM_021931]	CCCAGGGCTGCTTTGCTGTGATGATGATTGCATTTCAACACATGCCAGATGCAGATTTTT
A_33_P3219601	0.012704801	1.7290116E-4	down	2.0022385	ABL2	Homo sapiens c-abl oncogene 2, non-receptor tyrosine kinase (ABL2), transcript variant b, mRNA [NM_007314]	CCTGTCCTTAATAACTTATTGTCATGTGTACAGGAAATCAGTGATGTGGTGCAGAGGTAG
A_23_P153320	4.876452E-4	1.14618686E-7	down	5.0109634	ICAM1	Homo sapiens intercellular adhesion molecule 1 (ICAM1), mRNA [NM_000201]	GAAATACTGAAACTTGCTGCCTATTGGGTATGCTGAGGCCCACAGACTTACAGAAGAAGT
A_33_P3349145	0.0085312715	8.000887E-5	up	1.375631	TTLL1	Homo sapiens tubulin tyrosine ligase-like family, member 1 (TTLL1), transcript variant 1, mRNA [NM_012263]	CCTTTTGTAGAGCTTTTTTCCTTTCCTAAGCCCTGTAAATAAACGAAGGCACTTCTTTGG
A_23_P29204	0.014540864	2.2778696E-4	up	1.1920208	MTFP1	Homo sapiens mitochondrial fission process 1 (MTFP1), transcript variant 1, mRNA [NM_016498]	CACCTGGGTGGGTTTGAGCTGGACAGAAGCTTAGAGACAAAGGCTTCAAGAAGCAGTGGC
A_33_P3233645	0.007649212	6.3646046E-5	down	2.527026	MT1G	Homo sapiens metallothionein 1G (MT1G), mRNA [NM_005950]	CCCGTAAAATCTAGGATTTTTTGTTTTTTGCTACAATCTTGACCCCTTTGCTACATTCCC
A_23_P79962	0.014513954	2.2619276E-4	up	1.7103773	MKKS	Homo sapiens McKusick-Kaufman syndrome (MKKS), transcript variant 2, mRNA [NM_170784]	ACTGGCCAGATTTGCTTTCACAGTGTGGCTGTGGATTATACAATAGCCAGGAAGAACTCA
A_23_P69293	0.004595713	2.4025183E-5	up	2.2597117	CHDH	Homo sapiens choline dehydrogenase (CHDH), mRNA [NM_018397]	TGCCGCATCCTTTTTCTTGTGTTCACGTGGCATTCTCTAACCCAGGGCAGTGGTTCCTTC
A_23_P210643	0.010393537	1.18238844E-4	down	1.5921156	NELFCD	Homo sapiens negative elongation factor complex member C/D (NELFCD), mRNA [NM_198976]	ATGGTTCACCTGCTGAGTCGAGGTTATGTACTTCCTGTTGTCAGTTACATCCGAAAGTGT
A_23_P83923	0.011821067	1.489687E-4	down	1.5340691	ZNF672	Homo sapiens zinc finger protein 672 (ZNF672), mRNA [NM_024836]	TGAGGACCATTTTCACTGGGACCCAGGCCAAAACCATGTGGGTGCACAAAGCCAGGCACT
A_33_P3350074	0.0069772103	5.34627E-5	up	1.3136892	SLC25A19	Homo sapiens solute carrier family 25 (mitochondrial thiamine pyrophosphate carrier), member 19 (SLC25A19), transcript variant 1, mRNA [NM_001126121]	AGGTCCCTACACTTGGCCTGTTTTTCCAACCTATTTAATAGACATTAAAGCTAAACACAC
A_23_P404481	0.012701006	1.7255098E-4	down	2.1522202	S1PR1	Homo sapiens sphingosine-1-phosphate receptor 1 (S1PR1), mRNA [NM_001400]	GCTGAGGCCAAAGTTTCCATGTAAGCGGGATCCGTTTTTTGGAATTTGGTTGAAGTCACT
A_23_P78980	0.002327828	5.0772824E-6	up	2.0143497	B3GNT3	Homo sapiens UDP-GlcNAc:betaGal beta-1,3-N-acetylglucosaminyltransferase 3 (B3GNT3), mRNA [NM_014256]	CCAGTCAAGCTTCACAGGCATTGTGATGGGGCAGCCTTGGGGAATATAAAATTTTGTGAA
A_23_P210330	0.015102193	2.4268443E-4	up	1.5964236	LGALSL	Homo sapiens lectin, galactoside-binding-like (LGALSL), mRNA [NM_014181]	AGGGAGCCCTGTTTGCCTTGAGATAAACGGCCTTGGCATTTTCTGGCATTAATGTAGAAA
A_23_P121702	0.013577457	1.9913816E-4	up	1.6150146	OCIAD2	Homo sapiens OCIA domain containing 2 (OCIAD2), transcript variant 1, mRNA [NM_001014446]	AGACTCTCAGCCTTCAGCTTCCTAAATTCTGTGTCTGTGACTTTCGAAGTTTTTTAAACC
A_33_P3212700	0.015218188	2.4582713E-4	down	1.2908123			TGCACTCATGAGGTCTTTCTCCAGTGTGAACTCTCTGGTGGTAGATCAGGCTAAAGTTTT
A_33_P3320538	0.0017141959	2.8606867E-6	down	3.1212265	NUPL1	nucleoporin like 1 [Source:HGNC Symbol;Acc:20261] [ENST00000463407]	GGTGTAATGTAGCAGAGCTTAAGAATAGAACTCAATTATCACTTTTTGTGAACAAGTTGG
A_24_P53976	0.016696503	2.8334412E-4	down	2.4656188	GLUL	Homo sapiens glutamate-ammonia ligase (GLUL), transcript variant 1, mRNA [NM_002065]	ACGGGGCACCAAATTTGAGACAAATAGTCGGATTAGAAATAAAGCATCTCATTTTGAGTA
A_24_P82880	0.0018725558	3.301015E-6	down	1.5191044	TPM4	Homo sapiens tropomyosin 4 (TPM4), transcript variant 2, mRNA [NM_003290]	GTGACCTGGAAGAAGAACTCAAGAATGTTACTAACAATCTGAAATCTCTGGAGGCTGCAT
A_33_P3391005	0.0073173423	5.812916E-5	down	1.405893	NEDD4L	Homo sapiens neural precursor cell expressed, developmentally down-regulated 4-like, E3 ubiquitin protein ligase (NEDD4L), transcript variant j, mRNA [NM_001144967]	AAATTTCCAGTACATATGCGGTCAAAGACATCTTTAAACCCCAATGACCTTGGCCCCCTT
A_23_P433676	0.0048710634	2.713461E-5	down	1.1647737	ZNF529	Homo sapiens zinc finger protein 529 (ZNF529), transcript variant 2, mRNA [NM_020951]	ATTGGTTGTTGTTTCATGTCCTACACAGTAAGAACAAGAGTATGTTAACCTTTTTGTCAG
A_33_P3242623	0.010165504	1.1277748E-4	up	1.8446392	SLC7A11	Homo sapiens solute carrier family 7 (anionic amino acid transporter light chain, xc- system), member 11 (SLC7A11), mRNA [NM_014331]	GAAGTAAGTGTGTTTGTTTTCATCTTATGGAAACTCTTGATGCATGTGCTTTTGTATGGA
A_23_P15542	8.632388E-4	3.6980055E-7	down	1.9666051	HSD17B1	Homo sapiens hydroxysteroid (17-beta) dehydrogenase 1 (HSD17B1), mRNA [NM_000413]	CTGTGGGTGGCTAATTAAGATAGATCGCGTTAGCCAGTTTTACCAGCGCAGCTAGGCGCG
A_23_P116173	0.003829271	1.575091E-5	up	1.9642245	COLCA2	Homo sapiens colorectal cancer associated 2 (COLCA2), transcript variant 3, mRNA [NM_001136105]	CACAGTTTACATGTCACTATTTCCAATTTTCTGATGCTAAGCATTCATATGAAGTCCTCA
A_33_P3266780	0.009552261	1.0058557E-4	up	1.423066	PODXL2	Homo sapiens podocalyxin-like 2 (PODXL2), mRNA [NM_015720]	CTGGAGCAATCTGGCTGGGAAAAACTACATCATTCTGAACATGACAGAGAACATAGACTG
A_33_P3307495	0.0065643336	4.5670295E-5	down	2.224328	STRA6	Homo sapiens stimulated by retinoic acid 6 (STRA6), transcript variant 8, mRNA [NM_001199042]	TTTATGCCTTTGGCTATTATGAAAGAGGTTAGTGTGTTCCCTGCAATAAACTTGTTCCTG
A_23_P258612	0.0055548907	3.4077482E-5	down	1.84418	ATP8A2	Homo sapiens ATPase, aminophospholipid transporter, class I, type 8A, member 2 (ATP8A2), mRNA [NM_016529]	ACTCGTCTGCAGTGCTTAGCCTAACTTTTGTTTATGTCGTTATGAAGCATTCAACTGTGC
A_23_P254816	0.0010928122	1.1815574E-6	down	2.3460782	TCF15	Homo sapiens transcription factor 15 (basic helix-loop-helix) (TCF15), mRNA [NM_004609]	AACAAAGACTGTTGGTGACAGGGTGTGTGTGTATCTGTGCGTGAGTGTGAGTGTGTGTGA
A_24_P325520	0.017386213	3.0796262E-4	up	1.5101572	SORT1	Homo sapiens sortilin 1 (SORT1), transcript variant 1, mRNA [NM_002959]	CACGAAAGTGTAAAGCAGTATTAAGATCATTACTGCATGTGCCCTAAAAACCCAAGTTTT
A_33_P3237517	0.006971026	5.308761E-5	down	2.1698358	ZNF292	zinc finger protein 292 [Source:HGNC Symbol;Acc:18410] [ENST00000369578]	GGGAGGACTTGCTCCTTTTATTGGAGAATGGTATTAGAAACCAAGATCTATATTAAACTA
A_33_P3226832	0.012163551	1.6010314E-4	down	1.6117871	F3	Homo sapiens coagulation factor III (thromboplastin, tissue factor) (F3), transcript variant 1, mRNA [NM_001993]	CCTAATATGCTTTACAATCTGCACTTTAACTGACTTAAGTGGCATTAAACATTTGAGAGC
A_19_P00317683	0.00583872	3.6916575E-5	up	1.2052622	LINC00963	long intergenic non-protein coding RNA 963 [Source:HGNC Symbol;Acc:48716] [ENST00000444184]	CCTGGCACAGTGAAGCGAGGGTGGGGGCAGGAATGAGGGTCCTCTCCATGCAAGGGGGGA
A_23_P252062	0.009276503	9.5501426E-5	up	1.8245496	PPARG	Homo sapiens peroxisome proliferator-activated receptor gamma (PPARG), transcript variant 3, mRNA [NM_138711]	CCAAGGCTTCATGACAAGGGAGTTTCTAAAGAGCCTGCGAAAGCCTTTTGGTGACTTTAT
A_33_P3283480	0.015795676	2.6209842E-4	up	1.6009616	CTSC	Homo sapiens cathepsin C (CTSC), transcript variant 2, mRNA [NM_148170]	GGATCAACTCCATCTTACTAACCATTTGATTCCCTATGTATTACACGATATATGACCAAT
A_23_P62920	0.012087999	1.5786028E-4	down	1.5466222	KIFAP3	Homo sapiens kinesin-associated protein 3 (KIFAP3), transcript variant 1, mRNA [NM_014970]	TGTGTGGGTTGGGTTAATTTTGGATCTTTGCCTAATAATGCATGTTGATGTTATTGTGGG
A_23_P152284	0.013577457	1.9895143E-4	down	1.3305906	SNRNP25	Homo sapiens small nuclear ribonucleoprotein 25kDa (U11/U12) (SNRNP25), mRNA [NM_024571]	GCAATGACGGTCCGAGTGTGCAAGATGGATGGAGAAGTAATGCCCGTGGTTGTAGTGCAG
A_23_P162322	8.632388E-4	4.447047E-7	up	1.6581371	WNT10B	Homo sapiens wingless-type MMTV integration site family, member 10B (WNT10B), mRNA [NM_003394]	TTTGGAGCCATAAGATCTGTATCTAGAAAGAGATCACCCACTCCTATGTACTATCCCCAA
A_33_P3213374	0.005152257	2.9912035E-5	down	1.4400206	CITED2	Homo sapiens Cbp/p300-interacting transactivator, with Glu/Asp-rich carboxy-terminal domain, 2 (CITED2), transcript variant 1, mRNA [NM_006079]	TTTGCACCCTGCTGCAGGCCACCAGATGAACGGGACAAACCAGCACTTCCGAGATTGCAA
A_33_P3312499	0.009366607	9.784797E-5	up	2.7391677	MS4A15	Homo sapiens membrane-spanning 4-domains, subfamily A, member 15 (MS4A15), transcript variant 1, mRNA [NM_001098835]	AGATGAGATGGCTTGTCTCATCCACACCACAGAAGGAAATAAACCATGTGGCTTAAATTT
A_23_P329573	0.0015226095	2.362022E-6	up	2.797311	ITGB2	Homo sapiens integrin, beta 2 (complement component 3 receptor 3 and 4 subunit) (ITGB2), transcript variant 1, mRNA [NM_000211]	GCCAATTTATTTACATTTAAACTTGTCAGGGTATAAAATGACATCCCATTAATTATATTG
A_23_P19624	0.014892919	2.3698452E-4	up	1.5325716	BMP6	Homo sapiens bone morphogenetic protein 6 (BMP6), mRNA [NM_001718]	TGGTTCTCTGCCTTTTTACTATACAGCATACCACGCCACAGGGTTAGAACCAACGAAGAA
A_24_P224727	0.019703234	3.8064996E-4	up	1.2661738	CEBPA	Homo sapiens CCAAT/enhancer binding protein (C/EBP), alpha (CEBPA), transcript variant 1, mRNA [NM_004364]	GCCTTGTTTGTACTGTATGCCTTCAGCATTGCCTAGGAACACGAAGCACGATCAGTCCAT
A_23_P153086	0.006752413	4.8479917E-5	down	1.3723814	RBFA	Homo sapiens ribosome binding factor A (putative) (RBFA), transcript variant 1, mRNA [NM_024805]	GCTCTTCTGCTACTTCAACATTTTCTAGCTTTTCCGTGTATCTAAACACAATTTGCTACA
A_23_P40108	0.002283841	4.8849342E-6	down	3.6558943	COL9A3	Homo sapiens collagen, type IX, alpha 3 (COL9A3), mRNA [NM_001853]	TCAAAAGGCCCTAGCTAATAAACCTGTAAGCCCAGCATTTGAGAGAAGGTAGGGTGTGTA
A_24_P839254	0.003603008	1.39639815E-5	up	1.4531221	RPP14	Homo sapiens ribonuclease P/MRP 14kDa subunit (RPP14), transcript variant 1, mRNA [NM_001098783]	GGGCGTATGTGCATCCTCGGTCTCAGTTATGTAAACGGTCTGATCTGTAAAATAGTGGTA
A_23_P256724	0.018060317	3.2643985E-4	up	2.0697103	TNFRSF10C	Homo sapiens tumor necrosis factor receptor superfamily, member 10c, decoy without an intracellular domain (TNFRSF10C), mRNA [NM_003841]	ACCTCTCATGCACCATCGTAGGGATCATAGTTCTAATTGTGCTTCTGATTGTGTTTGTTT
A_23_P19987	0.0073173423	5.8217105E-5	up	2.5984867	IGF2BP3	Homo sapiens insulin-like growth factor 2 mRNA binding protein 3 (IGF2BP3), mRNA [NM_006547]	AACAAAAGGCTACATTTCCATGGGGCCAGCACTGTCATGAGCCTCACTAAGCTATTTTGA
A_24_P386622	0.012106103	1.5852781E-4	up	1.3082162	ARRB1	Homo sapiens arrestin, beta 1 (ARRB1), transcript variant 1, mRNA [NM_004041]	GAGACGCCAGTAGATACCAATCTCATAGAACTTGACACAAATGATGACGACATTGTATTT
A_24_P236935	0.0011901305	1.5385398E-6	down	2.7411375	KLK6	Homo sapiens kallikrein-related peptidase 6 (KLK6), transcript variant B, mRNA [NM_001012964]	GAAGCATAACCTTCGGCAAAGGGAGAGTTCCCAGGAGCAGAGTTCTGTTGTCCGGGCTGT
A_23_P108501	0.008741221	8.477603E-5	down	1.4015385	EPHA4	Homo sapiens EPH receptor A4 (EPHA4), mRNA [NM_004438]	AGATGCACGGCAGAATGGTTCCCGTCTGAGCCAGTACTGAATAAACTCAAAACTCTTGAA
A_33_P3348474	0.002250107	4.7102626E-6	down	1.8303744	LOC100128840	Homo sapiens cDNA FLJ25336 fis, clone TST00709. [AK058065]	TTACTAAAACAAGTAAACTGTCAGGAGGGCAGGCTTTGTTTGAAGCTTTTCATAACATAA
A_24_P882732	8.632388E-4	4.7220723E-7	down	1.7320058		keratin 17 pseudogene 1 [Source:HGNC Symbol;Acc:6428] [ENST00000582047]	CCCAGCTTCTCTGCGAGATGGAGCAGCAGAACCAGGAGTACAAGATCCTCCTGGACATGA
A_23_P321913	8.7588804E-4	5.764453E-7	down	1.863517	DEF6	Homo sapiens differentially expressed in FDCP 6 homolog (mouse) (DEF6), mRNA [NM_022047]	CAGGCCAGCACCAACGTGAAACACTGGAATGTCCAGATGAACCGGCTGATGCATCCAATT
A_24_P281009	0.0017773048	3.0495535E-6	up	2.5881565	AQP7P1	Homo sapiens aquaporin 7 pseudogene 1 (AQP7P1), non-coding RNA [NR_002817]	CACTGGTGATAGGCATCCTCGTGGTCATCATCAGGGTGTACCATGGCATGAACACAGGAT
A_23_P15146	0.0010583713	1.0238521E-6	up	3.2371712	IL32	Homo sapiens interleukin 32 (IL32), transcript variant 1, mRNA [NM_001012631]	GGAGGAGCTGACACCCCAGAAGTGCTCTGAACCCCAATCCTCAAAATGAAGATACTGACA
A_23_P55682	0.0075635593	6.240003E-5	up	1.7035079	ZSCAN18	Homo sapiens zinc finger and SCAN domain containing 18 (ZSCAN18), transcript variant 3, mRNA [NM_023926]	GCAAGTGGTCACCAGCATTACACAGCAATGAAGCAGAATAAAGTAGGCCAGAATGCATCA
A_23_P85180	0.006861894	5.1611376E-5	up	1.7632678	TMEM187	Homo sapiens transmembrane protein 187 (TMEM187), mRNA [NM_003492]	ACTTTTCTGTAGTTTGAAATGTTTCCAAATAAATATTGGCAAGGGGAGTGGAAATGACAC
A_23_P402787	0.016582936	2.806373E-4	down	1.3674508	UBALD1	Homo sapiens UBA-like domain containing 1 (UBALD1), mRNA [NM_145253]	TTGCTGTTCCTTGCAGAGAAAAGGATTGTGGGAAACTCCAGGACTCTTCCCACCGCCTCC
A_33_P3251985	0.01655149	2.7894933E-4	up	1.1869524	MFSD1	Homo sapiens major facilitator superfamily domain containing 1 (MFSD1), transcript variant 1, mRNA [NM_022736]	ATGATACTGGATTCTCGGGGGTATTTGTTTTTGGAAGTGTTCTTCATTGCCTGTGTTTCT
A_24_P53215	0.002681902	7.3933984E-6	down	1.8226151	UNC13D	Homo sapiens unc-13 homolog D (C. elegans) (UNC13D), mRNA [NM_199242]	TACAGGCACAGAGTCTCCTGGAAAAGGGAGAGGGGACCCTGCCAAAGATGAGGCTCCAGC
A_33_P3241428	0.002681902	7.6904935E-6	up	1.8208636	OBSL1	Homo sapiens obscurin-like 1 (OBSL1), transcript variant 1, mRNA [NM_015311]	ACAGCTTGGAAGGCGTTTGCCCTTACCCTGGGCAGGGGTAGAGAGACAAGGAACAATAAA
A_23_P319792	0.014447946	2.2332856E-4	up	1.3933042	XRN1	Homo sapiens 5'-3' exoribonuclease 1 (XRN1), transcript variant 1, mRNA [NM_019001]	ATCTTTACATTGTCTGCCAATTAAAGTGTTTTAAACTTGCATTGGAATGGACTCCGAATG
A_33_P3295458	0.003184709	1.151423E-5	up	1.9662223	LINC00634	Homo sapiens long intergenic non-protein coding RNA 634 (LINC00634), long non-coding RNA [NR_024355]	CTGGGGCTTCCATCTTAATTTATTCTCAATAATAAAGACTTCATGATGATCTCTGCAGGA
A_33_P3364884	0.0031441683	1.1159229E-5	up	2.6023283	PDHB	Homo sapiens pyruvate dehydrogenase (lipoamide) beta (PDHB), transcript variant 1, mRNA [NM_000925]	GTATGGATGTGGCAGAGTCCTCATGAAAGATGTATCCAAACAAGATAACTTATATGTATA
A_24_P706340	0.0028666416	9.521876E-6	down	2.4079185	FAM155A	Homo sapiens family with sequence similarity 155, member A (FAM155A), mRNA [NM_001080396]	CTGTCTTTATGTCCTGTCAGCTTCTATTAGAGGAATGATTGCTATGACCTCATGGTATAG
A_23_P164623	0.013818178	2.0461752E-4	down	1.6062137	ZBTB45	Homo sapiens zinc finger and BTB domain containing 45 (ZBTB45), mRNA [NM_032792]	CATCATATATGGGGGCTGGGCCTCGGGACTCTCGCTCTAATAAAGGACTGTAGGCCATGG
A_23_P147729	0.0110714	1.3063445E-4	up	1.3731495	SLC35E3	Homo sapiens solute carrier family 35, member E3 (SLC35E3), mRNA [NM_018656]	CCCTTGGCATTTTATGTACATTATTTGGCATTCTCGCCTATACCCACTTTAAGCTCAGTG
A_23_P41804	0.01223971	1.6225636E-4	up	2.148107	NKD2	Homo sapiens naked cuticle homolog 2 (Drosophila) (NKD2), transcript variant 1, mRNA [NM_033120]	TGAACACATCTGAAGCCACTATGTTTCCTGGCTCTAAGGCTCGTCTGTGTAACCCATAAA
A_23_P110531	0.011161759	1.3301238E-4	down	1.6850759	FST	Homo sapiens follistatin (FST), transcript variant FST344, mRNA [NM_013409]	CTGTGAAGATATCCAGTGCACTGGTGGGAAAAAATGTTTATGGGATTTCAAGGTTGGGAG
A_24_P270728	0.0022317343	4.4648873E-6	up	2.1007097	NUPR1	Homo sapiens nuclear protein, transcriptional regulator, 1 (NUPR1), transcript variant 1, mRNA [NM_001042483]	TATTCCCGCTGACTGAGTCTCTGAGGGGCTACCAGGAAAGCGCCTCCAACCCTAGCAAAA
A_33_P3343120	0.003621751	1.4556808E-5	up	1.8787327	IRF8	Homo sapiens interferon regulatory factor 8 (IRF8), mRNA [NM_002163]	GCTGAAGTGTTCATAAGATAACAATAGGCTTGAATCTCCAATTCAAATGAATGTCAAAGC
A_33_P3298425	0.00564675	3.5039182E-5	up	1.292919	LMO4	Homo sapiens LIM domain only 4 (LMO4), mRNA [NM_006769]	AGCTCTCATCAATGGCCATTTGAATTCACTTCAGAGCAATCCACTACTGCCAGACCAGAA
A_33_P3211818	0.015102193	2.4350932E-4	down	1.5338879	RUNX1	Homo sapiens runt-related transcription factor 1 (RUNX1), transcript variant 2, mRNA [NM_001001890]	TTTCACCTGGACGTGCCAGCGGCATGACAACCCTCTCTGCAGAACTTTCCAGTCGACTCT
A_23_P76731	0.006623343	4.654788E-5	down	1.5086951	MOK	Homo sapiens MOK protein kinase (MOK), transcript variant 1, mRNA [NM_014226]	TATATGAATCAAAACAAACGAGCAGGCATTTCTGTGATGTGTTGGGCGTGGTTGGAAGGT
A_24_P334130	0.010898492	1.2751043E-4	down	2.5638175	FN1	Homo sapiens fibronectin 1 (FN1), transcript variant 7, mRNA [NM_054034]	AATACTCTTTCTGCACAGACCACACTGTTTTGGTTCAGACTCGAGGAGGAAATTCCAATG
A_33_P3218832	0.0077511366	6.540505E-5	down	2.2469323	RIMS1	Homo sapiens regulating synaptic membrane exocytosis 1 (RIMS1), transcript variant 1, mRNA [NM_014989]	CCACTTGTCTTAACACTCCCCTGTGCTTTTAAATGAAATTCCAATTCATGTATGTAAACA
A_33_P3261902	0.011816481	1.4859131E-4	up	1.7859302	ENOSF1	Homo sapiens enolase superfamily member 1 (ENOSF1), transcript variant 2, mRNA [NM_001126123]	TAAAAAATCCTACCGATCAAGATGAGTTCAGCTAGAAGTCATACCACCCTCAGGAATCAG
A_33_P3318343	0.0020856608	4.0688647E-6	down	2.2078001	CTAG2	Homo sapiens cancer/testis antigen 2 (CTAG2), transcript variant 2, mRNA [NM_020994]	TCCCTGTTGATGTGGATCACGCAGTGCTTTCTGCCCGTGTTTTTGGCTCAGGCTCCCTCA
A_23_P392126	0.00906995	8.990809E-5	up	2.224993	LYRM9	Homo sapiens LYR motif containing 9 (LYRM9), mRNA [NM_001076680]	GTTTGTTTGTATCCTTGCAGTTATGTGACTTAAAGTGACTCAGAGATATCTATGTATGCG
A_33_P3327058	0.008384155	7.6713826E-5	down	1.4925436	ARHGEF2	Homo sapiens Rho/Rac guanine nucleotide exchange factor (GEF) 2 (ARHGEF2), transcript variant 1, mRNA [NM_001162383]	TGTCACTACTCGCTCTGTCCATCGAAACTTTGAGGACCGAGAGAGGCAGGAACTGGGGAG
A_33_P3365037	0.015102193	2.4333058E-4	down	1.3243703	ERCC1	Homo sapiens excision repair cross-complementing rodent repair deficiency, complementation group 1 (includes overlapping antisense sequence) (ERCC1), transcript variant 1, mRNA [NM_202001]	TCTGACCACCGTGAAGTCAGTCAACAAAACGGACAGTCAGACCCTCCTGACCACATTTGG
A_32_P91250	0.0077853785	6.624297E-5	down	1.4268098	UBE2L3	Homo sapiens ubiquitin-conjugating enzyme E2L 3 (UBE2L3), transcript variant 1, mRNA [NM_003347]	GTGGGATGAAAAACTTCTGTAACATCCAGGTTGATGAAGCTAATTTATTGACTTGGCAAG
A_23_P166663	0.0060225856	3.8928454E-5	up	1.7120911	APPL1	Homo sapiens adaptor protein, phosphotyrosine interaction, PH domain and leucine zipper containing 1 (APPL1), mRNA [NM_012096]	CCTCAGGCTCTACAATCTAGGGGTGGTAAATGTGTTTCCACTATACTTGGGAAAAGGTCA
A_33_P3357748	4.876452E-4	1.0982259E-7	up	1.4076433	PVT1	Homo sapiens Pvt1 oncogene (non-protein coding) (PVT1), long non-coding RNA [NR_003367]	AAATCCCTAACCTATGAGCTTTGAATAAGATGAGTACGAACTTCATCGCCCACGTGGCGT
A_33_P3308347	0.0037175394	1.5203946E-5	up	5.025914	ADAMTS8	Homo sapiens ADAM metallopeptidase with thrombospondin type 1 motif, 8 (ADAMTS8), mRNA [NM_007037]	GTGGATCCATTTCAAGTATTTATGCAAATGTGTCTCTGAACTAAAGTGTGATCTTATGCC
A_33_P3279545	0.0026611327	6.36619E-6	down	1.6622847	HIPK3	Homo sapiens homeodomain interacting protein kinase 3 (HIPK3), transcript variant 1, mRNA [NM_005734]	GTCTGATTTTTCAGAATGATCTAGCTTCAAGAAAAGCAAGCAGTTAGTAGTGCTTAAGAA
A_33_P3345534	0.0010583713	9.924976E-7	down	1.843208	KRT14	Homo sapiens keratin 14 (KRT14), mRNA [NM_000526]	CCAGTATGAGAAGATGGCAGAGAAGAACCGCAAGGATGCCGAGGAATGGTTCTTCACCAA
A_24_P29733	0.008204152	7.327718E-5	up	1.3158125	CDK14	Homo sapiens cyclin-dependent kinase 14 (CDK14), mRNA [NM_012395]	TGTGTATATGACAGCCAGTATAATCAATACCCTAGGTTATGCGTCTATATGATACTCATC
A_23_P143047	0.0042243116	2.0683656E-5	up	1.6701176	ATP6V1E2	Homo sapiens ATPase, H+ transporting, lysosomal 31kDa, V1 subunit E2 (ATP6V1E2), mRNA [NM_080653]	ACCAACAGAAAGTTCTTTATATAAGCCTCTGGGAAGTGAAGCTAGTGTTGAACCACTAAA
A_23_P253932	0.01980088	3.8519804E-4	up	1.5470213	FAIM	Homo sapiens Fas apoptotic inhibitory molecule (FAIM), transcript variant 1, mRNA [NM_001033030]	GGGAACCATGACTGTTACATAAAGGCTGTCAGTAGTGGGAAGCGGAAAGAAGGGATTATT
A_23_P118042	0.0055438974	3.37271E-5	up	1.3824377	LRRC36	Homo sapiens leucine rich repeat containing 36 (LRRC36), transcript variant 1, mRNA [NM_018296]	AGGCTCTCACCGCCATTGCCACCAGTATGGTGGTATGTACTCACAAAGATTAAGAAAGAA
A_23_P321307	0.010165504	1.126042E-4	up	1.9950867	ADAMTS2	Homo sapiens ADAM metallopeptidase with thrombospondin type 1 motif, 2 (ADAMTS2), transcript variant 2, mRNA [NM_021599]	GAACATTGTCAATGAAATCTACCATGACGAGTCCTTGGGTGCCCACATCAACGTGGTCCT
A_23_P500381	0.013063298	1.84535E-4	down	1.6946298	HTR7	Homo sapiens 5-hydroxytryptamine (serotonin) receptor 7, adenylate cyclase-coupled (HTR7), transcript variant d, mRNA [NM_019859]	TAACTCCCATTGACATTGCTTCTTACCAGACATGGGGAAAAGCTACCTTTCCTGAAAGGG
A_23_P158041	0.003603008	1.4204195E-5	up	3.08832	AQP7	Homo sapiens aquaporin 7 (AQP7), mRNA [NM_001170]	GCAGAGGAAGATGGTGCGAGAGTTCCTGGCCGAGTTCATGAGCACATATGTCATGATGGT
A_23_P162746	0.015697163	2.5753013E-4	up	1.968719	CRYL1	Homo sapiens crystallin, lambda 1 (CRYL1), mRNA [NM_015974]	TACTCTGGGGCCCTGCATTTATGAGGCACCTACCTTCATTTTGCTAACGCTTATTCTGAA
A_23_P87013	8.632388E-4	4.969371E-7	down	2.528826	TAGLN	Homo sapiens transgelin (TAGLN), transcript variant 1, mRNA [NM_001001522]	CCGTGGAGATCCCAACTGGTTTATGAAGAAAGCGCAGGAGCATAAGAGGGAATTCACAGA
A_23_P216712	0.015795676	2.6208363E-4	up	3.2298026	TRPM6	Homo sapiens transient receptor potential cation channel, subfamily M, member 6 (TRPM6), transcript variant a, mRNA [NM_017662]	TGCCCAATTGCCAAACTAAAGACATCAGTTCATTGGTCAAATATTTGTTACCTGGAATGG
A_23_P11915	0.0011350205	1.4139403E-6	down	1.4376249	GDAP2	Homo sapiens ganglioside induced differentiation associated protein 2 (GDAP2), transcript variant 1, mRNA [NM_017686]	GGAGCTGATAATTGGCAAAAGACCACTTTTACCACTCAGGCTCTATTTGTGCCTTAGCTT
A_33_P3221408	0.0028315147	8.452283E-6	down	1.9745066	NTNG1	Homo sapiens netrin G1 (NTNG1), transcript variant 1, mRNA [NM_001113226]	GGCAACGAACGTGCTGGCATCAAAGAATATCAGTTTACATATATAACAAGTGTAATAAGA
A_33_P3865368	0.009366607	9.7640375E-5	up	1.3697464	LOC254896	Homo sapiens uncharacterized LOC254896 (LOC254896), long non-coding RNA [NR_046173]	GCCTCCTGAAGACACAGAGCGGTTGCCTCTCTCATTAATTAATTAATTAGTTAATAAAAT
A_23_P127995	0.007730183	6.497444E-5	up	1.4881558	CLNS1A	Homo sapiens chloride channel, nucleotide-sensitive, 1A (CLNS1A), mRNA [NM_001293]	GGGAAAGAGAGAGCTCCTTTCGCCATGTTTTACCAGTCTGCTGTTATAACCTCTTAGGTT
A_23_P93641	0.017460369	3.1190223E-4	up	2.8236425	AKR1B10	Homo sapiens aldo-keto reductase family 1, member B10 (aldose reductase) (AKR1B10), mRNA [NM_020299]	ATCACAGTGAACTTAGTCCTGTTATAGACGAGAATCGAGGTGCTGTTTTAGACATTTATT
A_23_P433855	4.876452E-4	5.78517E-8	down	2.3561873	RGS4	Homo sapiens regulator of G-protein signaling 4 (RGS4), transcript variant 2, mRNA [NM_005613]	ATCTGATTCCTGTGAACACAATTCTTCCCACAACAAGAAGGACAAAGTGGTTATTTGCCA
A_33_P3286146	0.006386405	4.3831948E-5	up	3.9855258	LOC100132891	Homo sapiens uncharacterized LOC100132891 (LOC100132891), transcript variant 1, long non-coding RNA [NR_033652]	GGGGCTTCACAAGCTTGTAAATGTTTTTTAAAATCAGAGACTGTTATAAGTTTGCCCATT
A_32_P62963	0.001229156	1.7582202E-6	down	1.8826858	KRT16P2	Homo sapiens keratin 16 pseudogene 2 (KRT16P2), non-coding RNA [NR_029392]	TGGCGTGGACCTGAGCTGCATCCTGAATGAGATGCGCAACCAGTACGAGCAGATGGCAAA
A_23_P385217	0.0011655941	1.4794238E-6	up	1.4545974	ARL8B	Homo sapiens ADP-ribosylation factor-like 8B (ARL8B), mRNA [NM_018184]	TTAGGTGGATGCATTTTTTGTCTGTTTACTGCTCTTCTCAGCTTTATTCAATAAACTTGC
A_32_P515431	0.0024650397	5.5042606E-6	up	3.6959343	LOC101930067	PREDICTED: Homo sapiens uncharacterized LOC101930067 (LOC101930067), misc_RNA [XR_250705]	CAAGATTAAGTTAGAATAACACTGCTGTAGACTGTTTATCAGCTCTTCAGCATATGTCCA
A_23_P39955	8.632388E-4	3.2069664E-7	down	3.636666	ACTG2	Homo sapiens actin, gamma 2, smooth muscle, enteric (ACTG2), transcript variant 1, mRNA [NM_001615]	TAAAGTCAGAACAGGTTCTCCAAGGATCCCCTCGAGACTACTCTGTTACCAGTCATGAAA
A_33_P3395472	0.0011350205	1.4028037E-6	up	5.7218018			TAAAACGGCTCTGCATTAGTAACACTTTCCAATCACAAGGAATGTATTTTCATTGGTGTC
A_33_P3328559	0.0028666416	9.471603E-6	down	1.744989	TBC1D10C	Homo sapiens TBC1 domain family, member 10C (TBC1D10C), transcript variant 1, mRNA [NM_198517]	GGAAGGGGTTGGCTGAGTCAAGGGACCCCAGAGGGCACCAGGAATAAAATCTTCTTGAAC
A_32_P86578	0.009897487	1.0577042E-4	up	1.27364	DPP10-AS1	Homo sapiens DPP10 antisense RNA 1 (DPP10-AS1), long non-coding RNA [NR_036580]	ATTTCTGTTGCATTGGTGTTTCCAAAATAATGCTTCGGTTCCAAGTTTCAGGAATTGGTT
A_33_P3364459	0.0040967725	1.8392411E-5	up	1.2449559	GMPR2	Homo sapiens guanosine monophosphate reductase 2 (GMPR2), transcript variant 5, mRNA [NM_001283021]	AGTGGAAGTTCCTTTTAAAGGAGATGTGGAACATACCATCCGAGACATCCTAGGAGGGAT
A_33_P3278560	0.0069772103	5.3457505E-5	down	1.7514465	ZIK1	Homo sapiens zinc finger protein interacting with K protein 1 (ZIK1), mRNA [NM_001010879]	AACAAATGTGGGAATTCCTTTAGCCAATGCTCCAGCCTCATACATCACCAAAAATGTCAT
A_23_P86855	0.01872279	3.476555E-4	up	1.235624	MACROD1	Homo sapiens MACRO domain containing 1 (MACROD1), mRNA [NM_014067]	ATAAAAAGGACAAGCAGCTCAATGAGAAAATCTCCCTGCTCCGCAGCGACATCACCAAGC
A_23_P252748	0.012782412	1.7726226E-4	down	1.3158497	ZNF195	Homo sapiens zinc finger protein 195 (ZNF195), transcript variant 3, mRNA [NM_007152]	ACAAATGTGACGAATGTGGAAAAAACTTTACCCAGTCCTCCAACCTTATTGTACATAAGA
A_33_P3401711	0.006338181	4.285695E-5	up	1.4833083	USH1G	Homo sapiens Usher syndrome 1G (autosomal recessive) (USH1G), transcript variant 1, mRNA [NM_173477]	CCGAATCCCTCCTGCAGGCTCATTGCCACTTTTGTAGAGAATGTTCTCTATCAGTATCGT
A_19_P00317731	0.019283885	3.6385038E-4	down	1.7377442		PREDICTED: Homo sapiens uncharacterized LOC101927887 (LOC101927887), misc_RNA [XR_241392]	AGCTGTCCTGGGTGTTTAGCAGTTATTCGCACAGCTTTCCAAAGACTCACAGCATTTAAA
A_33_P3381827	0.0046748864	2.472322E-5	down	1.2284673	OSBPL2	Homo sapiens oxysterol binding protein-like 2 (OSBPL2), transcript variant 3, mRNA [NM_001278649]	ACTTCCTGTTCCATGGCTCCATCTACCCCAAGCTCAAGTTCTGGGGCAAAAGCGTGGAGG
A_24_P703830	0.0048606982	2.6277132E-5	up	1.4681951	NANOS3	Homo sapiens nanos homolog 3 (Drosophila) (NANOS3), mRNA [NM_001098622]	GTTTCCCTAGTGCTGGGCATCCAGTCAGCCCTCAATAAATGCTTATGAATGGATCAACAA
A_24_P854913	0.009922472	1.0704935E-4	up	1.3549032	METTL21A	Homo sapiens methyltransferase like 21A (METTL21A), transcript variant 2, mRNA [NM_001127395]	CAGGACGTTCTCTTCCTTTTGAACCTTTATCCCAGAGGTGAAAATATCCAATATGTTGTT
A_32_P78681	0.0028666416	9.567825E-6	up	2.1183586	GLP2R	glucagon-like peptide 2 receptor [Source:HGNC Symbol;Acc:4325] [ENST00000262441]	CCCTCACTCCACAAATGGGGTGATCAACACTTACTGCTTGCTCTTGTTCTGCTAATGATT
A_23_P50081	0.006866167	5.192403E-5	up	2.011337	IMPA2	Homo sapiens inositol(myo)-1(or 4)-monophosphatase 2 (IMPA2), mRNA [NM_014214]	TAGCTGTTTCTCTCTTTAATCTCACGTAGCCTTTTTCAGGTTAGTACGTGTTCTTCTGTC
A_23_P12199	0.0011350205	1.412194E-6	down	2.3998082	FAM46B	Homo sapiens family with sequence similarity 46, member B (FAM46B), mRNA [NM_052943]	TTTCCTTCAGGAGACAAAGCAAGTTTGGGGTGGTAGCCTTAATGCCCAGCACCTTGGATT
A_33_P3248765	0.018617772	3.4307988E-4	down	1.2516358	ADIPOR1	Homo sapiens adiponectin receptor 1 (ADIPOR1), transcript variant 1, mRNA [NM_015999]	TGCTTCAAGAGCATCTTCCGCATTCATACAGAAACTGGCAACATCTGGACCCATCTGCTT
A_23_P117782	0.0055438974	3.3585384E-5	up	1.533089	LARP6	Homo sapiens La ribonucleoprotein domain family, member 6 (LARP6), transcript variant 1, mRNA [NM_018357]	GCAAGTAGCTAAGCCTATAGCATGGTGTCTTGTAGGACCAAATCGATGTTACCTGTCAAG
A_32_P452655	0.012773252	1.7638462E-4	up	1.2557021	LGALS9C	Homo sapiens lectin, galactoside-binding, soluble, 9C (LGALS9C), mRNA [NM_001040078]	TGACCAGAGTGTTCTCTTCAGGGGACTGGCTCCTTTCCCAGTGTCCTTAAAATAAAGAAA
A_33_P3748714	0.01312103	1.8565895E-4	up	1.4700114	FUT10	Homo sapiens fucosyltransferase 10 (alpha (1,3) fucosyltransferase) (FUT10), mRNA [NM_032664]	TCTTCCCAATCCCAGCTCTTTCATTAACTAAATATGATCTTGGACATATCTCTTAACCTC
A_33_P3333282	0.0033372205	1.2382752E-5	up	2.7306795	FGF11	Homo sapiens fibroblast growth factor 11 (FGF11), mRNA [NM_004112]	TTAGGTACCCAAAAAGGGCCTGTCTAGATTTTTTCAGAAAAACGTGGAGTGCTAGGGGCA
A_32_P189781	0.001214477	1.5985594E-6	up	2.5269854	LINC00520	Homo sapiens long intergenic non-protein coding RNA 520 (LINC00520), transcript variant 1, long non-coding RNA [NR_026796]	TCCTTTTGAATCATAAGCACTTTTGTTAAATACCTCAAATCTTTCGAGAACAGCAAGGAG
A_23_P142974	0.008741221	8.4053296E-5	down	2.6737027	ARHGAP25	Homo sapiens Rho GTPase activating protein 25 (ARHGAP25), transcript variant 1, mRNA [NM_001007231]	CATCTCTGAGACACAGGGGCAGAAAATGACATTCATCTTTTGAGTCCTCATCCATGGAGT
A_32_P44453	0.0038296513	1.5985761E-5	up	1.4143217	INPP1	Homo sapiens inositol polyphosphate-1-phosphatase (INPP1), transcript variant 2, mRNA [NM_002194]	GATTCCACAGAGATCAATGTTCCACAGGACATTTTGGGAATTTGGGTGGACCCCATAGAT
A_23_P99747	0.0042152135	2.0013471E-5	up	1.6461186	CDKL1	Homo sapiens cyclin-dependent kinase-like 1 (CDC2-related kinase) (CDKL1), transcript variant 1, mRNA [NM_004196]	GATCTCATTCCTAGGCACCAGCAAGTGTTTAGCACGAATCAGTACTTCAGTGGAGTGAAA
A_24_P396720	0.012325222	1.6487797E-4	up	1.7293322	PPP1CB	Homo sapiens protein phosphatase 1, catalytic subunit, beta isozyme (PPP1CB), transcript variant 1, mRNA [NM_002709]	TTTCTTCAACCACTACCTTCTACATTGGTTGACTTAGACCGTAAGCTTTTTAAGTTTCTC
A_23_P405885	0.0019559204	3.5608273E-6	up	7.001856	DPPA2	Homo sapiens developmental pluripotency associated 2 (DPPA2), mRNA [NM_138815]	CTAAAGAATCCCTTTCTGTATGTCTGAAAACCCATTAAAATAAAGTCACTGCAATTGGCA
A_32_P33083	0.007876265	6.7867855E-5	up	2.1584265	VCX2	Homo sapiens variable charge, X-linked 2 (VCX2), mRNA [NM_016378]	AAGAACCACTGAGTCAGGAGAGCGAGGTGGAAGAACCACTGACTGTGTGGATGGCCAGCT
A_23_P50786	0.002681902	7.134365E-6	down	1.8785151	CLIP3	Homo sapiens CAP-GLY domain containing linker protein 3 (CLIP3), transcript variant 2, mRNA [NM_015526]	GAGGGGATCTCAAATCCTGGAACCCCGATTTCAATCTACGTTCTAGTCACTGGCCTCAAA
A_33_P3237775	0.0041061235	1.901296E-5	up	1.3646774	NR1H3	Homo sapiens nuclear receptor subfamily 1, group H, member 3 (NR1H3), transcript variant 1, mRNA [NM_005693]	TCTGAGATCTGGGATGTGCACGAATGACTGTTCTGTCCCCATATTTTCTGTTTTCTTGGC
A_23_P398854	0.0027124633	7.841884E-6	down	4.113424	DOK7	Homo sapiens docking protein 7 (DOK7), transcript variant 1, mRNA [NM_173660]	TGTCAGCTGTTTCTAAACCCAGACACTGTTTGTAATAGACTGGAAATAAAATGTTCTTTC
A_23_P8432	0.0010583713	9.87045E-7	up	1.2287788	COPS6	Homo sapiens COP9 signalosome subunit 6 (COPS6), mRNA [NM_006833]	TACCTCGGCACCATCACCAAAACGTGCAACACCATGAACCAGTTTGTGAACAAGTTCAAT
A_33_P3354464	0.006709573	4.74693E-5	down	1.5308803	LOXL1	Homo sapiens lysyl oxidase-like 1 (LOXL1), mRNA [NM_005576]	TGAGATGCAACATTCACTACACAGGTCGCTACGTTTCTGCAACAAACTGCAAAATTGTCC
A_33_P3726064	0.0042243116	2.07517E-5	up	1.5848286	SPATA3-AS1	Homo sapiens SPATA3 antisense RNA 1 (head to head) (SPATA3-AS1), long non-coding RNA [NR_033879]	GGGTCTTTGACCTTATTTGGAAAAAGCGTCTTTACAAATGTAAGTGACCTTATTTGGAAA
A_33_P3319785	0.007458194	6.0654253E-5	up	2.0420222			TGCCAGACTGTCCAGTATGGTGTTCAGTATGTCCAGTGAATAAAGAGATGAACAAACAGA
A_23_P38959	0.010880645	1.2683564E-4	up	1.4723216	VAV1	Homo sapiens vav 1 guanine nucleotide exchange factor (VAV1), transcript variant 1, mRNA [NM_005428]	CTATGACTTCTGCGCCCGAGACCGATCAGAGCTGTCGCTCAAGGAGGGTGACATCATCAA
A_32_P68050	0.008909109	8.753103E-5	down	1.5874785	NEK1	Homo sapiens NIMA-related kinase 1 (NEK1), transcript variant 2, mRNA [NM_012224]	AAGATGGAGTCTCGAGTACTGTGGACCAACTTAGTGACATTCATATAGAGCCTGGAACCA
A_23_P362824	0.009781984	1.03694314E-4	down	1.2502185	CSTF1	Homo sapiens cleavage stimulation factor, 3' pre-RNA, subunit 1, 50kDa (CSTF1), transcript variant 2, mRNA [NM_001324]	GTGTGATTTTCATCGGTTTTGTAAGTACAGGACTTGCCGTTTCTTTTGATCTCTTGATTG
A_33_P3276693	0.0028666416	9.199401E-6	up	1.9155383	PGF	Homo sapiens placental growth factor (PGF), transcript variant 1, mRNA [NM_002632]	TCCCTGCAGGGCCATCTGACTGCCAAGCCAGATTCTCTTGAATAAAGTATTCTAGTGTGG
A_19_P00318014	0.0010928122	1.1583124E-6	down	1.3440158	SNHG11	Homo sapiens small nucleolar RNA host gene 11 (non-protein coding) (SNHG11), long non-coding RNA [NR_003239]	TGTGACTCATGGCTGGACCTTCTTGCCCCTATTGTCTCAGCACAACATTATTCGACTTTT
A_23_P20122	0.007201309	5.6364694E-5	down	1.5498084	ZC3HAV1	Homo sapiens zinc finger CCCH-type, antiviral 1 (ZC3HAV1), transcript variant 2, mRNA [NM_024625]	GGATTGATGCAGTACACCTAAGGAATAATCATATATACTGGGTTTTTGTTTTGCTGTGGA
A_24_P346855	0.015795676	2.6211652E-4	up	3.22642	MKI67	Homo sapiens marker of proliferation Ki-67 (MKI67), transcript variant 1, mRNA [NM_002417]	TCTCACCCTGGTAAGTACAGTATTTCAAGAGCACGCTAAGGGTGGTTTTCATTTTACAGG
A_23_P106158	0.0028666416	9.184544E-6	up	1.1240327	L2HGDH	Homo sapiens L-2-hydroxyglutarate dehydrogenase (L2HGDH), mRNA [NM_024884]	CAGTTCTTGCCTTTAAACGAGAGGGTTACAGACCCTTTGACTTCAGTGCCACAGATGTTA
A_24_P126425	0.009366607	9.796148E-5	down	1.7746893	FAM188B	Homo sapiens family with sequence similarity 188, member B (FAM188B), mRNA [NM_032222]	TGCAGACAGCATCAAAACCAATTGACCTCTCAGTAGCAAAGGAAATAAAGACCCTTCTGT
A_23_P207461	0.002681902	7.506237E-6	up	2.7024896	CA10	Homo sapiens carbonic anhydrase X (CA10), transcript variant 2, mRNA [NM_020178]	CACAAAGTACAAAACGAATGCCTTTCTTTTCTTGTTTATAATGGTCACTCACTGTGTTTG
A_23_P15272	0.011288072	1.3717083E-4	up	1.6623229	ABCC6	Homo sapiens ATP-binding cassette, sub-family C (CFTR/MRP), member 6 (ABCC6), transcript variant 2, mRNA [NM_001079528]	GTTCCCCCACTGGCTGTATTATAGGACAATTTTTATATGTGATATGTATTTACCTTAGTG
A_33_P3420976	0.0030082017	1.0605952E-5	up	2.321776	FAM159B	Homo sapiens family with sequence similarity 159, member B (FAM159B), mRNA [NM_001164442]	TCTGTGTTTTAAATGCTTACTGGAGAGATGGGACAATAAAAATAAAGCGTGCACTTGAAA
A_24_P135406	0.0092396755	9.447077E-5	up	1.2574147	KCTD9	Homo sapiens potassium channel tetramerization domain containing 9 (KCTD9), mRNA [NM_017634]	TGGAAGGAAGTCAGATGACAGGAATTAACCTGAGAGTGGCTACCTTAAAAGATGCAAAGT
A_23_P142750	0.004501889	2.3067618E-5	up	1.097795	EIF2AK2	Homo sapiens eukaryotic translation initiation factor 2-alpha kinase 2 (EIF2AK2), transcript variant 1, mRNA [NM_002759]	AGAACAGATTTCTTCGCAAGACTATGGAAAGGAAGTGGACCTCTACGCTTTGGGGCTAAT
A_23_P13604	0.0055438974	3.3749428E-5	up	1.2830386	PEBP1	Homo sapiens phosphatidylethanolamine binding protein 1 (PEBP1), mRNA [NM_002567]	GAGGAAACCTGAGATCTGTGTTTTTTAAATTGATCGTTCTTCATGGGGGTAAGAAAAGCT
A_23_P165061	0.0048710634	2.7063685E-5	up	1.6338303	AES	Homo sapiens amino-terminal enhancer of split (AES), transcript variant 1, mRNA [NM_198969]	GTGTCTGTATATAGTCAGCTTATCTCGTGTTCAATCGTCTGATCTCTACAGAGAGAAGTG
A_23_P399078	0.0054185614	3.20949E-5	down	1.8797947	TIMP3	Homo sapiens TIMP metallopeptidase inhibitor 3 (TIMP3), mRNA [NM_000362]	CAAGATGGCACCCAAGTGTTTGGCTTCTGGCTACCTAAGGTTAACATGTCACTAGAGTAT
A_33_P3258627	0.009380515	9.83361E-5	down	1.6999673			TGCCTAAGAGAAAATTCTTCCTAAGGCTAAGATTGTTAAATAAAGGAACTGGTCCACCCA
A_23_P76488	0.00906995	8.967204E-5	down	1.625549	EMP1	Homo sapiens epithelial membrane protein 1 (EMP1), mRNA [NM_001423]	CATGTAATTTGCATTACTCTGGTGGATTGTTCTAGTACTGTATTGGGCTTCTTCGTTAAT
A_33_P3357087	0.012433012	1.6715673E-4	up	1.4069577	MPV17	Homo sapiens MpV17 mitochondrial inner membrane protein (MPV17), mRNA [NM_002437]	AGACTCCCGGAACCCTTTATATGGTGCCTCAGTAAATATGTTATTAAATATGTAATCCGG
A_24_P49383	0.010898492	1.2756961E-4	up	1.6164196	AAMDC	Homo sapiens adipogenesis associated, Mth938 domain containing (AAMDC), mRNA [NM_024684]	AAGGAAGTTGTTGAGAAGGGTGTACAGACTCTTGTGATTGGCCGAGGGATGAGTGAGGCC
A_23_P58390	0.0052602794	3.066281E-5	up	1.3616138	C4orf32	Homo sapiens chromosome 4 open reading frame 32 (C4orf32), mRNA [NM_152400]	TAATACTAACTATTTAGTATACTGTCAGTACTGTACATCTGCACACTGGTGTTAATAGGG
A_24_P207139	0.014693839	2.3090046E-4	down	1.8197567	PML	Homo sapiens promyelocytic leukemia (PML), transcript variant 1, mRNA [NM_033238]	ACAGTGAATTTTGATGCATTTAAAATAAGATTCTGATGCCAGACTGTTAAAACAGGCGCT
A_23_P251499	0.0028666416	8.771423E-6	down	1.78629	PCOLCE	Homo sapiens procollagen C-endopeptidase enhancer (PCOLCE), mRNA [NM_002593]	CTCGTCCAGTTCGTCTCAGATCTCAGTGTCACCGCTGATGGCTTCTCAGCCTCCTACAAG
A_33_P3360426	0.0073173423	5.7874553E-5	down	1.4281918	WDR1	Homo sapiens WD repeat domain 1 (WDR1), transcript variant 1, mRNA [NM_017491]	CTGGGATAGTGGCTCTTCTGTGGGCGAGATTACAGGACACAACAAAGTCATCAACAGCGT
A_23_P152655	0.006752413	4.9090897E-5	down	2.480482	ICAM2	Homo sapiens intercellular adhesion molecule 2 (ICAM2), transcript variant 5, mRNA [NM_000873]	CTGTGACAGGCAGCAGAGACTTGGGACATTGCCTTTTCTAGCCCGAATACAAACACCTGG
A_32_P188860	0.009200237	9.360505E-5	up	2.2494655	IL17RD	Homo sapiens interleukin 17 receptor D (IL17RD), mRNA [NM_017563]	ATGTTAATGACTTGATTTGTACATAACTCTGTAACTAGGTGAAAGTAGATCACAGCTGAC
A_23_P315815	0.011161759	1.3267872E-4	up	1.5520228	NRG1	Homo sapiens neuregulin 1 (NRG1), transcript variant HRG-gamma, mRNA [NM_004495]	AAATACTTCTTCATCTACATCTACATCCACCACTGGGACAAGCCATCTTGTAAAATGTGC
A_19_P00321303	0.0055548907	3.3985452E-5	up	1.1806114	LINC00963	long intergenic non-protein coding RNA 963 [Source:HGNC Symbol;Acc:48716] [ENST00000444184]	CATTGCGGTGATAGGGCCAAGGGCCTGGGCCTTCAATTCTCCAGACTTGCCAAAATGCTC
A_23_P386478	0.008384155	7.660507E-5	up	2.0374591	TNIP3	Homo sapiens TNFAIP3 interacting protein 3 (TNIP3), transcript variant 1, mRNA [NM_024873]	AATACAGGAAAAGGCTTCTGACAGCTAAGATCCTGATCAAATTGGAGGAGCCAGTTATTA
A_33_P3233608	0.017754324	3.184052E-4	down	2.838014	SPANXB2	Homo sapiens SPANX family, member B2 (SPANXB2), mRNA [NM_145664]	ATACTAGTGGTTCGCTACAGGAGGAACGTGAAAAGAACATCTCCAGAGGAACTGGTGAAT
A_23_P210939	0.012773252	1.7474659E-4	down	1.4721401	EIF6	Homo sapiens eukaryotic translation initiation factor 6 (EIF6), transcript variant 2, mRNA [NM_181468]	TCACCTTCCAAGTTGTTCCATGGGCTCCTGGCTCTGGACTGTGGCCAACCTTCTCCACAT
A_33_P3320772	0.012622487	1.7089088E-4	down	1.7985182	ATXN1	Homo sapiens ataxin 1 (ATXN1), transcript variant 1, mRNA [NM_000332]	AATTCCTCAGGAGGTTAAGATTTGCATTGAAGGCCGGTCTAATGTAGGCAAGTAGAGGCA
A_23_P170733	0.0028666416	9.372396E-6	down	1.6763794	ANTXR2	Homo sapiens anthrax toxin receptor 2 (ANTXR2), transcript variant 1, mRNA [NM_058172]	TTGGTGTCCAGGTTTGTGGCACTGTTCCAAGAGGCCTTACACACACACACAAATATACAA
A_32_P12202	0.017386213	3.0812563E-4	up	2.8446295	FAM9C	family with sequence similarity 9, member C [Source:HGNC Symbol;Acc:18405] [ENST00000333995]	TTTTTTGAAACAGCTGCAGCAAGAGTTGGCACTTATTCAGATGTATCTTCAACCTCTGTT
A_23_P208400	0.011279095	1.3501303E-4	down	1.5091168	ADCK4	Homo sapiens aarF domain containing kinase 4 (ADCK4), transcript variant 1, mRNA [NM_024876]	GGTGCAAGCCGGGAGTTTGGGACAGAGTTCACAGACCATTACATCGAGGTGGTGAAGGCT
A_33_P3396239	0.0075004897	6.117452E-5	down	1.4869181	SNRPD3	Homo sapiens small nuclear ribonucleoprotein D3 polypeptide 18kDa (SNRPD3), transcript variant 1, mRNA [NM_004175]	GACGTGGAAACATCTTTCAAAAGCGAAGATAATTTTCTAAGTTGAACAGAACTTTGTCCT
A_23_P2041	0.009200237	9.363503E-5	down	2.0645368	MICALCL	Homo sapiens MICAL C-terminal like (MICALCL), mRNA [NM_032867]	AGCAAATAACTCATATAGCAGGTGTTAATTCAATCCAGGGTGAATTTAATTTACCAGGTG
A_23_P4714	0.019156747	3.6021616E-4	down	2.2113907	MIA	Homo sapiens melanoma inhibitory activity (MIA), transcript variant 1, mRNA [NM_006533]	CTGGCAAAGTCGATGTGAAGACAGACAAATGGGATTTCTACTGCCAGTGAGCTCAGCCTA
A_23_P29318	0.011874455	1.5127406E-4	up	1.125415	SAMM50	Homo sapiens SAMM50 sorting and assembly machinery component (SAMM50), mRNA [NM_015380]	CTTTGGAGAACTTTTCCGAACACACTTCTTTCTCAACGCAGGAAACCTCTGCAACCTCAA
A_23_P89780	0.0040967725	1.8717285E-5	down	2.4183483	LAMA3	Homo sapiens laminin, alpha 3 (LAMA3), transcript variant 1, mRNA [NM_198129]	TCTAATTTTGAATTCTGACCATGGATACCCATCACTTTGGCATTCAGTGCTACATGTGTA
A_23_P342138	0.014849314	2.3454551E-4	down	1.8661932	ADAMTSL1	Homo sapiens ADAMTS-like 1 (ADAMTSL1), transcript variant 4, mRNA [NM_001040272]	GTTGGGTCTCCTTCTTCTTCACCACAAAAACAGGCTCTAAGAAATCATGTTACTAAAAAA
A_23_P431789	0.007876265	6.826149E-5	up	1.5343696	ARF4	Homo sapiens ADP-ribosylation factor 4 (ARF4), mRNA [NM_001660]	GGTTTTTAATACTCAGCAGATTGTCTTCCCATATTGTGTCTTTTTTATGTTGCATGTTGC
A_24_P192262	0.0040967725	1.8765373E-5	down	1.3537555	RALA	Homo sapiens v-ral simian leukemia viral oncogene homolog A (ras related) (RALA), mRNA [NM_005402]	TTTGTCCTTAAAGGGTTTGAGATGTACATCTTTCATTTCGTATTTCTCATAGGCTATGCC
A_23_P27367	0.0073173423	5.9082195E-5	down	1.245445	KDSR	Homo sapiens 3-ketodihydrosphingosine reductase (KDSR), mRNA [NM_002035]	GACACTTATGTATTGTTTTCGAATACGTCAGATTGGACCAGTGCTCTTCAGGAATGTGGC
A_23_P166280	9.2814513E-4	6.326527E-7	up	1.5178847	ICOSLG	inducible T-cell co-stimulator ligand [Source:HGNC Symbol;Acc:17087] [ENST00000407780]	CTCAGGGGAGTTCTCAGCTTGGACCCTTATCTCCCCAGAATCCTGGAACCTGCTCCTTCT
A_24_P140608	0.0040967725	1.8278695E-5	down	1.7434272	HBEGF	Homo sapiens heparin-binding EGF-like growth factor (HBEGF), mRNA [NM_001945]	CCCATCTGTAGTAATTTATTGTCTGTCTACATTTCTGCAGATCTTCCGTGGTCAGAGTGC
A_24_P3415	0.011816481	1.4856069E-4	up	1.7447126	PPP2R2C	Homo sapiens protein phosphatase 2, regulatory subunit B, gamma (PPP2R2C), transcript variant 2, mRNA [NM_181876]	GGAGGTCTTAATACAGTTCCTAGTTCCTTACTTCTGTTTTAAACTTTGGGTACCAAACCA
A_32_P147622	0.0050753555	2.8630517E-5	up	1.4826878	MCF2L-AS1	Homo sapiens MCF2L antisense RNA 1 (MCF2L-AS1), long non-coding RNA [NR_034002]	CGGCAACAATGCACCAGCATTCCAGCGTCCAACAGAGCATCCGTGTACCATTCCGGCATT
A_32_P192376	0.009352868	9.650744E-5	down	2.6172183	ENPP1	Homo sapiens ectonucleotide pyrophosphatase/phosphodiesterase 1 (ENPP1), mRNA [NM_006208]	CCATCATAGGAATGGGCATTTGAACTTTGAAACTGAATGTGGTGATTACACTTCATGCTG
A_33_P3300312	0.014491271	2.2548411E-4	down	3.110661	DMBT1	Homo sapiens deleted in malignant brain tumors 1 (DMBT1), transcript variant 2, mRNA [NM_007329]	AGGACCCATTGTCCTGGATGATGTGCGCTGCTCAGGACATGAGTCCTATCTGTGGAGCTG
A_23_P41854	0.013044283	1.8380997E-4	up	1.5008615	CARD6	Homo sapiens caspase recruitment domain family, member 6 (CARD6), mRNA [NM_032587]	ACTAGCTTCTGCTAATAGCCCCAATTTGCTTGAATGGGAAAACTCTCTCATTTGACCCTT
A_23_P110699	0.014274331	2.1907545E-4	down	1.9479905	ZNF300	Homo sapiens zinc finger protein 300 (ZNF300), transcript variant 2, mRNA [NM_052860]	CAGATTCAGTAAAGTTGATCTGTATGCATTTTCCCATCTCAAGCATATAAGTTGACCTGC
A_33_P3328666	0.013885919	2.0921082E-4	up	1.5604061	CLTB	Homo sapiens clathrin, light chain B (CLTB), transcript variant 2, mRNA [NM_007097]	GGGTGTGTTGTTGACTCTTTTTACACTTATTTATTATCATTCTCACTTCTCTGGAAGCCA
A_33_P3231814	0.004298901	2.1522294E-5	up	1.7205907	XLOC_014512	BROAD Institute lincRNA (XLOC_014512), lincRNA [TCONS_l2_00014683]	GTACTTTACTCCACTATACATTTGAAAGTGGGTGCAATGGAAAAGTTTATGTGATGAGTT
A_24_P260443	0.009276503	9.538554E-5	up	1.608147	THBS4	Homo sapiens thrombospondin 4 (THBS4), mRNA [NM_003248]	ACCATCCCTGAGGACTTCCAAGAGTTTCAAACCCAGAATTTCGACCGCTTCGATAATTAA
A_23_P350045	0.0028894437	9.885045E-6	up	1.6190021	REEP5	Homo sapiens receptor accessory protein 5 (REEP5), mRNA [NM_005669]	TCGGGAAGACTCCTCTACTCACAGCTGAAGAAAATGAGCACACCCTTCACACTGTTATTA
A_23_P60146	0.006752413	4.9518225E-5	up	2.4694748	PDGFRL	Homo sapiens platelet-derived growth factor receptor-like (PDGFRL), mRNA [NM_006207]	CCAGTCTATTCACAGAAGTGTTAACTTTTCTAACAGAAAGCATGATTTTGATTGCTTACC
A_19_P00320570	0.006709573	4.7444595E-5	down	2.2676194	XLOC_004620	BROAD Institute lincRNA (XLOC_004620), lincRNA [TCONS_00010154]	TGAAGTCATAAATGACTAGAGGGAGCTGGAGTGTGAGGGTCCAGAAACTTGTATGATCCA
A_23_P165360	0.006055422	3.9943076E-5	down	1.2924625	ASB1	Homo sapiens ankyrin repeat and SOCS box containing 1 (ASB1), mRNA [NM_001040445]	GAGGCCTTGCAGGTCTTTAAAGAGGCCAGAAGTGTTCCCAGAACCTTGCTGTGTCTGTGC
A_23_P74609	4.876452E-4	1.07812205E-7	up	9.085237	G0S2	Homo sapiens G0/G1switch 2 (G0S2), mRNA [NM_015714]	CCAACACTGTGTGAATTATCTAAATGCGTCTACCATTTTGCACTAGGGAGGAAGGATAAA
A_33_P3411075	0.013577457	1.9884837E-4	up	1.6280917	FSCN1	Homo sapiens fascin homolog 1, actin-bundling protein (Strongylocentrotus purpuratus) (FSCN1), mRNA [NM_003088]	CTAAACGCCCATGATAGTAGCTTCAAACTGGAAATAGCGAAATAAAATAACTCAGTCTGC
A_23_P104563	0.0029188816	1.0085218E-5	up	2.7119932	CPT1A	Homo sapiens carnitine palmitoyltransferase 1A (liver) (CPT1A), transcript variant 2, mRNA [NM_001031847]	ATGACGGCTATGGTGTGTCGTACATCCTTGTGGGAGAGAACCTCATCAATTTCCACATTT
A_33_P3387901	0.006752413	4.7999933E-5	up	1.236492	SLC25A19	Homo sapiens solute carrier family 25 (mitochondrial thiamine pyrophosphate carrier), member 19 (SLC25A19), transcript variant 1, mRNA [NM_001126121]	ATTCTCAGTGCACTTTGTATGTGGTGGCCTGGCTGCCTGTATGGCCACCCTCACTGTGCA
A_23_P201778	0.0026611327	6.66181E-6	down	1.5953729	PTPN7	Homo sapiens protein tyrosine phosphatase, non-receptor type 7 (PTPN7), transcript variant 2, mRNA [NM_080588]	TCACTCAGGACTTCTCTCCTGAAGAACACGCAGTGCTAAAACTGAGGATGATTTCCCTAA
A_24_P21831	0.018673997	3.449938E-4	down	1.5374674	ZNF26	Homo sapiens zinc finger protein 26 (ZNF26), transcript variant 2, mRNA [NM_019591]	CTCTGAATGTGGGAAATCCTTCTGTTGGAATTCAGGGCTTCGTATACATCGGAAGACTCA
A_33_P3221303	0.013577457	1.9909785E-4	up	1.9081815	CCR10	Homo sapiens chemokine (C-C motif) receptor 10 (CCR10), mRNA [NM_016602]	ACTACCTCTGTGCCTTGCCACATTAAATTGATAACATGGAAATGAGATGCAACCCAACAA
A_23_P338479	0.0045537846	2.3440565E-5	down	2.6845515	CD274	Homo sapiens CD274 molecule (CD274), transcript variant 1, mRNA [NM_014143]	GAGTTTTTCCTATTTATTTTGAGTCTGTGAGGTCTTCTTGTCATGTGAGTGTGGTTGTGA
A_33_P3413905	0.0028656446	8.688874E-6	up	1.3256437	ADM2	Homo sapiens adrenomedullin 2 (ADM2), transcript variant 1, mRNA [NM_024866]	GAACTCGGAGGTGAGCTCCTCTCACCACTCTCTTGAATAAAGCTTTTCTCACCATTTTAA
A_33_P3269636	0.0028108144	8.324424E-6	down	4.99087	SBSN	Homo sapiens suprabasin (SBSN), transcript variant 1, mRNA [NM_001166034]	GACAGGTTTCTGAAATCCCTGAAGGGGGTTGTACTGGGATTTGTGAATAAACTTGATACA
A_23_P71513	0.009143453	9.1982554E-5	up	1.7395504	EFR3A	Homo sapiens EFR3 homolog A (S. cerevisiae) (EFR3A), mRNA [NM_015137]	GGTCTTTGTTGATTTGGGTTTTGTTGGGGTTTTTGTTACTGTTTTTAAATTACAGTAGGC
A_23_P167096	0.007121245	5.548261E-5	down	1.7023873	VEGFC	Homo sapiens vascular endothelial growth factor C (VEGFC), mRNA [NM_005429]	TTTCTGCCAATGACCAAACAGCCAAGATTTTCCTCTTGTGATTTCTTTAAAAGAATGACT
A_24_P169544	0.010708642	1.2333375E-4	down	1.303727	ZNF17	Homo sapiens zinc finger protein 17 (ZNF17), mRNA [NM_006959]	TGGGGAAAGACTTCACACAGAAATCTACTCTGATTTAGCACTGGGACCTACGTTTTAAAA
A_23_P69242	0.002250107	4.7598924E-6	up	2.751767	SUMF1	Homo sapiens sulfatase modifying factor 1 (SUMF1), transcript variant 1, mRNA [NM_182760]	CAGTTCAGCCGTTGAACACATAGGAATGTCTGTGGGGTGACTCTACTGTGCTTTATCTTT
A_23_P161698	0.001229156	1.7623345E-6	down	3.8295834	MMP3	Homo sapiens matrix metallopeptidase 3 (stromelysin 1, progelatinase) (MMP3), mRNA [NM_002422]	TGACTCGAGTCACACTCAAGGGAACTTGAGCGTGAATCTGTATCTTGCCGGTCATTTTTA
A_33_P3307113	0.014372606	2.2127293E-4	down	1.9063401	MSMP	Homo sapiens microseminoprotein, prostate associated (MSMP), mRNA [NM_001044264]	TCCAGGGAAACCACTAGCAGCTGCCAATGTATTCTGAACAAATAAATTAATGCTATAGCT
A_33_P3250128	0.014407523	2.2214914E-4	down	1.3587708	SNX18	Homo sapiens sorting nexin 18 (SNX18), transcript variant 2, mRNA [NM_052870]	CTATTAGCGCTGTATCAGGGGCATCTGGCTAACTTCCCGGACATCATCCACGTTCAGAAA
A_23_P98350	0.006622557	4.6386696E-5	up	1.6709875	BIRC3	Homo sapiens baculoviral IAP repeat containing 3 (BIRC3), transcript variant 1, mRNA [NM_001165]	TCCTATACATCGAAGGTGTGCATATATGTTGAATGACATTTTAGGGACATGGTGTTTTTA
A_33_P3304369	0.018960627	3.543001E-4	up	1.549524			ACCAGACACAGGCCAAAGCCACTACAGAATCCGGAAGCCCCGGTTGGGATCTGAATTCTC
A_33_P3310649	0.016810922	2.8923716E-4	down	1.8458716		PREDICTED: Homo sapiens uncharacterized LOC101927887 (LOC101927887), misc_RNA [XR_241392]	AATGCGTTTGACTTGAGCATATTGATTTCAGGCAGGTGAGAGTGGATGTAGCGATTCAGC
A_23_P141974	0.013893685	2.0989431E-4	down	1.4102803	TPM4	Homo sapiens tropomyosin 4 (TPM4), transcript variant 2, mRNA [NM_003290]	AGGCCAAAGAAGAGAACGTGGGCTTACATCAGACACTGGATCAGACACTAAACGAACTTA
A_23_P144896	0.01983944	3.8797542E-4	down	1.413312	PDLIM7	Homo sapiens PDZ and LIM domain 7 (enigma) (PDLIM7), transcript variant 1, mRNA [NM_005451]	ACACCTGCTTCGTCTGTGCGATATGTCAGATCAACCTGGAAGGAAAGACCTTCTACTCCA
A_23_P98786	0.018069949	3.270387E-4	up	1.7414415	MYO7A	Homo sapiens myosin VIIA (MYO7A), transcript variant 1, mRNA [NM_000260]	ATACCAACTGGGCCTCTGATGTTCTTCCAGTGAGGCATCTCTCTGGGATGCAGAACTTCC
A_23_P4190	0.012805023	1.7847876E-4	up	1.7709736	ACSF2	Homo sapiens acyl-CoA synthetase family member 2 (ACSF2), mRNA [NM_025149]	GCAAAGGGAAGATCTCTCACTTCAAGATTCCGAAGTACATCGTGTTTGTCACAAACTACC
A_19_P00812033	0.01970279	3.7864828E-4	down	1.5307868			CTCAGAGGAGGAGTATTCCACCAAAGAAGAGAAATATGAAAAGGAGATGAAACTGCTGGA
A_33_P3286151	0.0048606982	2.6116497E-5	up	2.564022	LOC100132891	Homo sapiens uncharacterized LOC100132891 (LOC100132891), transcript variant 2, long non-coding RNA [NR_033651]	TAAAGCCAGTATTATAGGACACTTCTCAGACTGAGAGCCCAATGTCGTTGGAAACCACTG
A_23_P67127	0.0028894437	9.9155895E-6	down	1.8596293	TMEM145	Homo sapiens transmembrane protein 145 (TMEM145), mRNA [NM_173633]	CTTCCCTCGGGTCCCTGGCAGAAAGACATTTTACCCCTTCTTGCCAAAATAAAAAAGGAT
A_23_P216340	0.019552186	3.7454534E-4	down	1.2722476	SLA	Homo sapiens Src-like-adaptor (SLA), transcript variant 1, mRNA [NM_001045556]	ACCCCCTGAACTCCAGATGTCTGCACAGTATCTTATGTGTTGTTTTCCGTTGTGACGAAT
A_23_P96158	0.0057891305	3.643111E-5	down	2.052652	KRT17	Homo sapiens keratin 17 (KRT17), mRNA [NM_000422]	CTGGCCCAGCTTCGCTGCGAGATGGAGCAGCAGAACCAGGAATACAAAATCCTGCTGGAT
A_23_P16022	0.013872305	2.0770145E-4	down	1.7275586	ZNF256	Homo sapiens zinc finger protein 256 (ZNF256), mRNA [NM_005773]	GGATAAAGGTTAGGTAACACACATAGGGCTGTTACGGACTGAGAAGTGTCCCTGCAAAAT
A_23_P161659	0.002052998	3.885732E-6	up	2.3058383	SYT13	Homo sapiens synaptotagmin XIII (SYT13), transcript variant 1, mRNA [NM_020826]	AGGGTCCATTTCTCTTGGATGTAAAGGAGTCCTGGGTAAAATGTGGCTGTAACCTAAACC
A_23_P347468	0.013347077	1.8948488E-4	up	1.7902336	FZD3	Homo sapiens frizzled family receptor 3 (FZD3), transcript variant 1, mRNA [NM_017412]	TTAGGCATGAAATCAATCAGAAGAGAAAGAAAAATGCTGGAACATGCTTGATGTATTATG
A_24_P264943	0.0078233145	6.6749635E-5	up	1.4202604	COMP	Homo sapiens cartilage oligomeric matrix protein (COMP), mRNA [NM_000095]	TTACCGCTGCAATGACACCATCCCAGAGGACTATGAGACCCATCAGCTGCGGCAAGCCTA
A_24_P251969	0.01013261	1.1003093E-4	down	1.8305871	FGF1	Homo sapiens fibroblast growth factor 1 (acidic) (FGF1), transcript variant 1, mRNA [NM_000800]	AGACCATTTGTATTACCATTACTTGTATAAATACACTTCCTGCTTAAACTTGACCCAGGT
A_33_P3367970	0.016960222	2.94743E-4	up	1.304877			AGTTCCACTGAACACCAGACCAAGCAATTCTGTCTGTTTACACTATTAGCCTAGTTTTCT
A_33_P3261084	0.013880142	2.0814504E-4	down	1.4705462	IDH3B	Homo sapiens isocitrate dehydrogenase 3 (NAD+) beta (IDH3B), transcript variant 2, mRNA [NM_174855]	TCTGAGGAGAAGCTGGAGCAGGTGCTGAGTTCCATGAAGGAGAACAAAGTGGCCATCATT
A_19_P00319027	0.009602066	1.0133571E-4	down	2.791739	RFX8	RFX family member 8, lacking RFX DNA binding domain [Source:HGNC Symbol;Acc:37253] [ENST00000484091]	GAAAAGCTCTTTCTTCTATGCCCAGTATTGCTACCTGATAGGTGAAAAAAGGTATCACAG
A_23_P143569	0.014693839	2.3105367E-4	down	1.2729064	DGCR6L	Homo sapiens DiGeorge syndrome critical region gene 6-like (DGCR6L), mRNA [NM_033257]	TACGTGACCACCAACCCACAGGAGCTGATGCTGCAGATGAACCTGCTGGAACTCATCCGA
A_23_P318284	0.0028666416	8.926468E-6	up	1.563908	GPD1L	Homo sapiens glycerol-3-phosphate dehydrogenase 1-like (GPD1L), mRNA [NM_015141]	CAGCCAATCTGTGAATGTAAAAACTACACTGTTGCCTTGCTAGGATCCACCCTCCTATAA
A_23_P56213	0.010614916	1.2175529E-4	down	1.3595034	GRAMD1A	Homo sapiens GRAM domain containing 1A (GRAMD1A), transcript variant 1, mRNA [NM_020895]	AACTCGTGGAGCGGCATTGAAGACTATTTCCACCATCTGGAGCGAGAGCTCGCCAAGGCT
A_33_P3415820	0.0045934147	2.3752527E-5	down	2.5598755	THBS1	Homo sapiens thrombospondin 1 (THBS1), mRNA [NM_003246]	AAGTTCCAAGACCTGGTGGATGCTGTGCGGGCAGAAAAGGGTTTCCTCCTTCTGGCATCC
A_33_P3281695	0.012008213	1.5467155E-4	down	2.1696796	NLRP3	Homo sapiens NLR family, pyrin domain containing 3 (NLRP3), transcript variant 6, mRNA [NM_001243133]	TTAGAAACACTTCAAGAAGAAAAGCCTGAGCTGACCGTCGTCTTTGAGCCTTCTTGGTAG
A_33_P3288859	0.006784816	5.012852E-5	up	1.5551256	CDPF1	Homo sapiens cysteine-rich, DPF motif domain containing 1 (CDPF1), mRNA [NM_207327]	AACTACTCAAGGCCAACTGTCACATGAAGGAATGAATAAAGAGTTTTTACTGACTTGTGC
A_23_P33326	0.012540423	1.6889558E-4	up	1.9585367	ADRA1B	Homo sapiens adrenoceptor alpha 1B (ADRA1B), mRNA [NM_000679]	CTCCTTGTACTTCACTGAAGGATGGCACTTTGGTGGGGTTGGAAACAAAGTCGACATTAA
A_24_P257348	0.0029894959	1.0469736E-5	up	2.7690563	ARL6IP5	Homo sapiens ADP-ribosylation-like factor 6 interacting protein 5 (ARL6IP5), mRNA [NM_006407]	GTTTTCACCAGCAAGTATTTGTTGCAAACTTAATGTCATTTTCCTTAAGATGGTTACAGC
A_33_P3423600	0.006212774	4.1618066E-5	up	1.3456609	OXLD1	Homo sapiens oxidoreductase-like domain containing 1 (OXLD1), mRNA [NM_001039842]	ACAGACTCCTTGTGTCCAACGGGAATAGGAAGAATTAGTTACTGACTTCACCTGAAAAAA
A_23_P161507	0.0033372205	1.2393485E-5	up	5.567644	MTL5	Homo sapiens metallothionein-like 5, testis-specific (tesmin) (MTL5), transcript variant 1, mRNA [NM_004923]	ACATAACTAGCTTGTGGAAACCAGCAGGTAAAATGAATTCTTAAGTTGACGCTTTTGGTT
A_32_P75792	0.004595713	2.3940147E-5	down	1.708605	FAM132A	Homo sapiens family with sequence similarity 132, member A (FAM132A), mRNA [NM_001014980]	AGCTGCAGGCTGGACAGTACGCTTCTGTGTTTGTGGACAATGGCTCCGGGGCCGTCCTCA
A_23_P386268	0.0038979617	1.6491553E-5	down	2.8189669	C4orf26	Homo sapiens chromosome 4 open reading frame 26 (C4orf26), transcript variant 2, mRNA [NM_178497]	AAGGCCCAGAATCCATTTTAGGTTTCCAAACAGACCTTTCGTCCCTTCAAGGTGTAACCA
A_19_P00322658	0.0015417772	2.4642343E-6	up	9.269439		Q4U2V9_CHLRE (Q4U2V9) Hydroxyproline-rich glycoprotein GAS30 precursor, partial (5%) [THC2602224]	TGCAGCCTTCCTGGGATAAAGCTCTGCCTTTTAGTCTCTTATCCTACTTTTTAGAAGCCC
A_33_P3259973	0.007963522	6.944334E-5	down	1.2877316	ZNF667-AS1	Homo sapiens ZNF667 antisense RNA 1 (head to head) (ZNF667-AS1), transcript variant 2, long non-coding RNA [NR_036522]	TGTGGTTTCAACCCTACTTCTGCATCTTAAAGACACTGTATGGTTTCAGCAGTAGTGCCC
A_33_P3287218	0.013044283	1.839598E-4	up	1.6712565	GSTK1	Homo sapiens glutathione S-transferase kappa 1 (GSTK1), transcript variant 2, mRNA [NM_001143679]	AAGTGCCTTTCAGAGAGCCCCAATTCTGCTTTCCCACAAAATAAACCTAATGCCATCAGG
A_23_P208389	0.009143453	9.182648E-5	down	1.4412738	AXL	Homo sapiens AXL receptor tyrosine kinase (AXL), transcript variant 1, mRNA [NM_021913]	TGCAATTTCAAGGTTCTAACCCTATACTGTAGTATTCTTTGGGGTGCCCCTCTCCTTCTT
A_23_P39237	0.019703234	3.7985216E-4	down	1.6330961	ZFP36	Homo sapiens ZFP36 ring finger protein (ZFP36), mRNA [NM_003407]	GGTGCTCAAATTACCCTCCAAAAGCAAGTAGCCAAAGCCGTTGCCAAACCCCACCCATAA
A_33_P3243887	0.006338181	4.2905067E-5	down	2.365261	IL11	Homo sapiens interleukin 11 (IL11), transcript variant 1, mRNA [NM_000641]	GTGTATGATTGTCTGTATTTTACAGAATTTCTGCCATGACTGTGTATTTTGCATGACACA
A_33_P3358938	0.012046675	1.5629956E-4	down	1.3194627	CLOCK	Homo sapiens clock circadian regulator (CLOCK), transcript variant 1, mRNA [NM_001267843]	GGAACAGTAATTACTTTCAGAATGTTGTGTGGGTTCAAATTCTCTATGTACAGATGATGT
A_23_P428329	0.0077842637	6.605052E-5	up	1.7961414	PTF1A	Homo sapiens pancreas specific transcription factor, 1a (PTF1A), mRNA [NM_178161]	CCCAGAAAACTCAACAGCAAATCTTCCTTCAACAACATAGAAAACGAACCACCATTTGAG
A_19_P00321206	0.015967976	2.6727095E-4	down	1.7566026		PREDICTED: Homo sapiens uncharacterized LOC101059946 (LOC101059946), misc_RNA [XR_171346]	TGGAAAGCTGTGCGAATAACTGCTAAACACCCAGGACAGCTTATGCATTTTTTGAAAAAG
A_23_P75299	0.019552186	3.7292019E-4	up	1.6179806	LHPP	Homo sapiens phospholysine phosphohistidine inorganic pyrophosphate phosphatase (LHPP), transcript variant 1, mRNA [NM_022126]	TTTCTGGACCCACTGCTGGACAGACTTGAAGGTGTCATGCCCGGTGTGTGCAGGAGGAAA
A_23_P142714	0.005981273	3.8239657E-5	up	1.5239439	SLC25A12	Homo sapiens solute carrier family 25 (aspartate/glutamate carrier), member 12 (SLC25A12), transcript variant 1, mRNA [NM_003705]	CGGTTCTGAGTGGCTTGAAATGTACAGAATGTTTTGAAAGTGTTTTATTAAGAATCACAC
A_23_P76538	0.004938547	2.7626613E-5	up	2.3009117	TESC	Homo sapiens tescalcin (TESC), transcript variant 1, mRNA [NM_017899]	GCTCGTCTGCGCACCTTGTGTCTTGTAGGGTATGGTATGTGGGACTTCGCTGTTTTTATC
A_33_P3395321	0.0075082397	6.159068E-5	up	1.434132	HN1	Homo sapiens hematological and neurological expressed 1 (HN1), transcript variant 2, mRNA [NM_001002032]	ATCTGGACTGCAGAGAAGGAACTCCTCTGAAGCAAGCTCCGGAGACTTCTTAGATCTGAA
A_23_P121011	0.011916374	1.5236826E-4	down	1.7789286	CSRNP1	Homo sapiens cysteine-serine-rich nuclear protein 1 (CSRNP1), mRNA [NM_033027]	GCGTGATGTTCCTTAGCCCAAAGACGGTGAGACAGGGCTGAAATCAGGTGGCTTCTGCCA
A_23_P13772	0.011874455	1.5073817E-4	down	1.9332433	TBX3	Homo sapiens T-box 3 (TBX3), transcript variant 2, mRNA [NM_016569]	AGAGCATCCAGCGGTTGGTTAGCGGCTTGGAAGCCAAGCCGGACAGGTCCCGCAGCGCGT
A_33_P3237729	0.01676835	2.849575E-4	down	1.3010757	PDLIM4	Homo sapiens PDZ and LIM domain 4 (PDLIM4), transcript variant 1, mRNA [NM_003687]	CCTGCCAGCTCAGGATATTATGTTTCTTTTTTCATTTTTGCCAGTCTGTTAAGTAAAATG
A_23_P46063	0.008741221	8.4729734E-5	down	1.2115351	NME7	Homo sapiens NME/NM23 family member 7 (NME7), transcript variant 1, mRNA [NM_013330]	ATAATGCTACAAAGACATTTCGAGAATTTTGTGGACCTGCTGATCCTGAAATTGCCCGGC
A_23_P128375	0.011462819	1.413477E-4	up	1.3069637	FAM222A	Homo sapiens family with sequence similarity 222, member A (FAM222A), mRNA [NM_032829]	TGTCCCACACGATCAAGGCAGGGAAAGATAGGCAGGAGTCCCCTCACGAAGTCCTCAAGT
A_33_P3386621	0.011279424	1.3627039E-4	up	1.807519	LOC101928179	PREDICTED: Homo sapiens uncharacterized LOC101928179 (LOC101928179), misc_RNA [XR_243586]	GTGGCCAAGTTAGGGCTTTAGGTTACCCATCACCCAAATAAAGTATATTGTACCCATTAA
A_23_P166196	0.013885919	2.0913557E-4	down	1.3860289	AAR2	Homo sapiens AAR2 splicing factor homolog (S. cerevisiae) (AAR2), transcript variant 1, mRNA [NM_015511]	TTCCTCTCTAGACAAGTACACAGGCCTGCCACCTGACATCAAACTGTTGTACTATGATCA
A_23_P53193	0.015218188	2.4609503E-4	down	2.1107368	SYTL2	Homo sapiens synaptotagmin-like 2 (SYTL2), transcript variant c, mRNA [NM_206927]	GCACCTAAGGAATACTACACAGCATGTAAAAGTCAATCTGCATGTGCTTCTTTGATTACA
A_33_P3245290	0.019552186	3.7404153E-4	up	3.184736	AQP7P1	Homo sapiens aquaporin 7 pseudogene 1 (AQP7P1), non-coding RNA [NR_002817]	GTGATAAGAATATTACTTCCCATTTGTGTTGCTGTGAATATTAAATGCGCTACCACATGT
A_23_P2181	0.01570641	2.5842022E-4	down	1.3755158	CYB5R2	Homo sapiens cytochrome b5 reductase 2 (CYB5R2), mRNA [NM_016229]	CTTGCTTGGAGGCTGGCAAGAGCTCCATTTCAGTATCTTTCTCCGTGGTTTTGTGAAATA
A_19_P00319324	0.01865337	3.441743E-4	up	1.9817151	PLD1	phospholipase D1, phosphatidylcholine-specific [Source:HGNC Symbol;Acc:9067] [ENST00000497307]	GTAGATAACCACAAGCAGATGTGTCAAAGCTCTTTTGTCCAGGAATAAACTGAGTTTCGT
A_33_P3263890	0.015102193	2.4201821E-4	up	1.7531513	PRRX1	Homo sapiens paired related homeobox 1 (PRRX1), transcript variant pmx-1a, mRNA [NM_006902]	GATTTGTAGGGTACTTGGCAGGTTAAATTAAACCAGAAGAGGTGACTTAATAAAAAAGGG
A_33_P3210561	0.012368556	1.6599943E-4	down	1.388805			GCCTTCGCCTTCACCTTCATCAGCAGCATGATGTACCTGATAACTGAGGAAGCCGAATAG
A_23_P145874	0.008384155	7.685558E-5	down	1.78957	SAMD9L	Homo sapiens sterile alpha motif domain containing 9-like (SAMD9L), mRNA [NM_152703]	CATTGATATCCACTGGTCACATCATAACTGTCTATAGGGCAATAAAATCTGTGTTAAACT
A_24_P205045	0.016960222	2.961579E-4	up	1.7097048	ERC2	Homo sapiens ELKS/RAB6-interacting/CAST family member 2 (ERC2), mRNA [NM_015576]	TGTATTAGCCAGTCATTGTAACCTCGTGTCTAGTAGAACAATGTACAAGGTATGTACAGT
A_23_P137504	0.011821067	1.4948253E-4	down	1.8170248	ZBTB37	Homo sapiens zinc finger and BTB domain containing 37 (ZBTB37), transcript variant 2, mRNA [NM_032522]	ATTGATACCACAGGCCATGGTTCTGTAGGACAGGAAAATTATACTTTAGGGTCTTCAGGA
A_33_P3384562	0.008472504	7.8063735E-5	down	1.4824375	PDLIM7	Homo sapiens PDZ and LIM domain 7 (enigma) (PDLIM7), transcript variant 4, mRNA [NM_213636]	GGTACTGCTGTCTGCCAGGTCTGTGCTGCCTTGGGCATGGAATAAACATTCTCAGCCCTG
A_23_P141035	0.016810922	2.891289E-4	up	1.5609988	CHST4	Homo sapiens carbohydrate (N-acetylglucosamine 6-O) sulfotransferase 4 (CHST4), transcript variant 1, mRNA [NM_005769]	TGCACAAAAGAGCAAGCTCTTAAGTTCACAGGGTGCCTGGGCTGCATTTGAATATCACTT
A_33_P3217393	0.0067642173	4.976378E-5	down	1.4158082	CD276	Homo sapiens CD276 molecule (CD276), transcript variant 1, mRNA [NM_001024736]	TTGTTTGATGTGCACAGCGTCCTGCGGGTGGTGCTGGGTGCGAATGGCACCTACAGCTGC
A_19_P00317180	9.4151637E-4	7.009544E-7	up	1.4002298	PVT1	Homo sapiens Pvt1 oncogene (non-protein coding) (PVT1), long non-coding RNA [NR_003367]	CTCCCAGATTCACAAGCCCCACCAAGAGGATCACCCCAGGAACGCTTGGAGGCTGAGGAG
A_23_P413888	0.011387031	1.397116E-4	up	1.4126371	SLC35F1	Homo sapiens solute carrier family 35, member F1 (SLC35F1), mRNA [NM_001029858]	GAACCACAATTCTCCTGAACCCTGCTAGAGATTAAGTGGTGGTTCTCACTTCCTCAATGA
A_19_P00811951	0.0010583713	1.0448135E-6	down	2.2857928			GAATCACTAACTCCAAGGCATCCAGTCACTCAGCATAGGCCGGGCCCTGTCTTCTCTGAC
A_24_P203000	0.019106185	3.5791818E-4	down	1.7456397	IL2RB	Homo sapiens interleukin 2 receptor, beta (IL2RB), mRNA [NM_000878]	TTGAGGTTGTCTGAGTCTTGGGTCTATGCCTTGAAAAAAGCTGAATTATTGGACAGTCTC
A_32_P44394	0.010880645	1.2684922E-4	down	2.9798784	AIM2	Homo sapiens absent in melanoma 2 (AIM2), mRNA [NM_004833]	GAAGGAGATAAGGTTCGACTTACATTCTTCACACTGTCAAAAAATGGAGAAAAACTACAG
A_33_P3400263	0.0042243116	2.0567033E-5	up	1.4528272	CHRAC1	Homo sapiens chromatin accessibility complex 1 (CHRAC1), transcript variant 1, mRNA [NM_017444]	GGTGGCTGTGTTTCAATAGAGCTTTATTTCTGCAAACTGAAACTTGAGTTTTGTGTAATT
A_33_P3349637	0.0048710634	2.6681828E-5	up	1.7311438	PCDH1	Homo sapiens protocadherin 1 (PCDH1), transcript variant 1, mRNA [NM_002587]	GGCTTCTGGGGCTGGGTCCCACATGCCCTTGACCCTGACAATAAAGTTCTCTATTTTTGG
A_23_P20743	0.0028666416	9.38957E-6	up	1.5337023	TMEM246	Homo sapiens transmembrane protein 246 (TMEM246), mRNA [NM_032342]	GCAGGACCATGTGGATAGATTCCATTTGTTTCCTTGACCTGATGTAATAAAAACTGATAA
A_23_P91081	4.876452E-4	9.791642E-8	up	2.3239443	EPCAM	Homo sapiens epithelial cell adhesion molecule (EPCAM), mRNA [NM_002354]	TCAAAATATAAGCAGCTTGAAACTGGCTTTACCAATCTTGAAATTTGACCACAAGTGTCT
A_23_P116602	0.017110579	3.0122983E-4	up	1.6224787	USP35	Homo sapiens ubiquitin specific peptidase 35 (USP35), mRNA [NM_020798]	TGCTGTAGCCCCCTTCTAACTTCTAACCGAAGACAAGACAGACACCCATGTTCTTAAATA
A_24_P239017	0.0040967725	1.8351959E-5	down	1.3111103	UBE2MP1	Homo sapiens ubiquitin-conjugating enzyme E2M pseudogene 1 (UBE2MP1), non-coding RNA [NR_002837]	CATCCATGCGGGATGGCTACATAGGCTCCACCTACTTCGAGCGCTGCCTGAAATAGGGTT
A_24_P318656	0.014274331	2.1908892E-4	down	1.7970845	ITGB3	Homo sapiens integrin, beta 3 (platelet glycoprotein IIIa, antigen CD61) (ITGB3), mRNA [NM_000212]	ATGTGTGGACACATTGGACCTTTCCTGAGGAAGAGGGACTGTTCTTTTGTCCCAGAAAAG
A_23_P320261	0.010847126	1.2586609E-4	up	1.2065916	DMKN	Homo sapiens dermokine (DMKN), transcript variant 1, mRNA [NM_001035516]	AGTTCTCCAGGAAGGAGGAGCTTCCTACTTTTGAGTTTCTCTGTGGAAATAAAACATGAA
A_23_P78108	0.012325222	1.6502525E-4	up	1.9944136	ALDOC	Homo sapiens aldolase C, fructose-bisphosphate (ALDOC), mRNA [NM_005165]	TGGCCAGGGCCAAATAGCTATGCAGAGCAGAGATGCCTTCACCTGGCACCAACTTGTCTT
A_33_P3299982	0.0068290303	5.1186074E-5	down	1.3039933	USF2	Homo sapiens upstream transcription factor 2, c-fos interacting (USF2), transcript variant 1, mRNA [NM_003367]	CTCCCCTTTGGGGGTGTGTGTGTGTGTTTTAATTTTCTTTATGGAAAAATTGACAAAAAA
A_23_P128919	0.018593052	3.418881E-4	down	1.7816468	LGALS3	Homo sapiens lectin, galactoside-binding, soluble, 3 (LGALS3), transcript variant 1, mRNA [NM_002306]	GGAAACCATTCAAAATACAAGTACTGGTTGAACCTGACCACTTCAAGGTTGCAGTGAATG
A_33_P3335629	0.009366607	9.737724E-5	down	1.214974	TMEM208	Homo sapiens transmembrane protein 208 (TMEM208), mRNA [NM_014187]	CTACCACTCTATGAGCTCGATGGCACGAGCAGCGTTCTCTGAGGATGGGGCCCTGATGGA
A_23_P337753	0.0024650397	5.459604E-6	down	1.9833949	SP140L	Homo sapiens SP140 nuclear body protein-like (SP140L), mRNA [NM_138402]	AGGATTTCAAGGAAGTGTTTGCTATTCAGGAAACAAATGGGAACAGTTGACTGGTTTAGT
A_23_P202978	0.014372606	2.2097751E-4	up	1.9378443	CASP1	Homo sapiens caspase 1, apoptosis-related cysteine peptidase (CASP1), transcript variant alpha, mRNA [NM_033292]	CTGTTCCTGTGATGTGGAGGAAATTTTCCGCAAGGTTCGATTTTCATTTGAGCAGCCAGA
A_32_P34589	0.0085312715	7.9916215E-5	up	1.2624469	RSRC1	Homo sapiens arginine/serine-rich coiled-coil 1 (RSRC1), transcript variant 2, mRNA [NM_016625]	GGAAAAATGGTTCAAGAGATTAATTGCTCTCCGACAAGAAAGACTAATGGGCAGTCCTGT
A_33_P3268304	0.018551342	3.4011158E-4	down	1.8320354	LIMS2	Homo sapiens LIM and senescent cell antigen-like domains 2 (LIMS2), transcript variant 5, mRNA [NM_001161404]	CCAGCGCAGACCTGGTGTTTGTTTGTTGGGCTCACGCTTGCACAATGAAGGCTTGTTCAC
A_24_P285768	0.012008213	1.5453754E-4	up	1.4298521	EDEM1	Homo sapiens ER degradation enhancer, mannosidase alpha-like 1 (EDEM1), mRNA [NM_014674]	ATTACCACCTGTAATTCCTCTTTGGATTGTGTAGACTCAACATGAGACATTCCTTTCTGC
A_23_P66881	0.012023547	1.5544757E-4	down	1.5182728	RGS9	Homo sapiens regulator of G-protein signaling 9 (RGS9), transcript variant 1, mRNA [NM_003835]	ACACACTTGCTCGAGAACCAAAGTGCATTTGGGTGACATTTGAAGATTGGGGAGACAAGA
A_23_P388871	0.014274331	2.1719148E-4	up	1.7613249	HIST4H4	Homo sapiens histone cluster 4, H4 (HIST4H4), mRNA [NM_175054]	ACAGTGGGCAGCCCGATTTTCTGCTGAGTAGGCGCTGTGATTTCAGAATGTCTGGGCGAG
A_23_P89902	0.01948089	3.6997435E-4	down	1.4242628	RTN2	Homo sapiens reticulon 2 (RTN2), transcript variant 1, mRNA [NM_005619]	CAGGATCACTCCCACTAGGGACTCTGCGCTAATTACCTGAGCGACCAGGACTACATTTCC
A_33_P3368049	0.013044283	1.8351337E-4	up	2.4050546	C1orf233	Homo sapiens chromosome 1 open reading frame 233 (C1orf233), mRNA [NM_001242659]	GCCGGTCAGGCGCAAACCTGGCGCCAGTGTCTAAATGTCCATCATTCTCAGACCAACAGA
A_24_P372562	0.017110579	3.0116626E-4	up	1.2305356	PTPMT1	Homo sapiens protein tyrosine phosphatase, mitochondrial 1 (PTPMT1), transcript variant 1, mRNA [NM_175732]	CACAAGCAGATTACTGCACGGGCAACAAAGGATGGGACTTTTGTCATTTCAAAGACATGA
A_23_P67618	0.0010857984	1.1191534E-6	down	2.4416575	ZNF792	Homo sapiens zinc finger protein 792 (ZNF792), mRNA [NM_175872]	CAGGATTCAGGGTTTGCAGAAATTCTCAGGACCTCAGACCTCTGTCCTATGACTAATGTT
A_23_P304489	0.007876265	6.815343E-5	down	1.8191293	FAM19A5	Homo sapiens family with sequence similarity 19 (chemokine (C-C motif)-like), member A5 (FAM19A5), transcript variant 2, mRNA [NM_015381]	TAGATCAACTTGACCGTACTAAAATCCCTTTCTGTTTTAACCAGTTAAACATGCCTCTTC
A_24_P56363	0.013028001	1.8190165E-4	up	1.7312768	CAB39L	Homo sapiens calcium binding protein 39-like (CAB39L), transcript variant 1, mRNA [NM_030925]	CCCTGACAGTTCAGAGTCCCTTCGAATTGCACTTTTCTGGTTTCGCTTATTTAATTAAAA
A_23_P210948	0.00909149	9.103243E-5	down	1.3104608	UQCC1	Homo sapiens ubiquinol-cytochrome c reductase complex assembly factor 1 (UQCC1), transcript variant 1, mRNA [NM_018244]	TTTGTGTTGAGTTTCCTCTTAGTGTGCCCAGGAGTCTGATCTGCTGGGGTACAGGGCTGG
A_24_P279489	0.019112254	3.5889796E-4	down	2.1918757	VPS53	Homo sapiens vacuolar protein sorting 53 homolog (S. cerevisiae) (VPS53), transcript variant 1, mRNA [NM_001128159]	TTAGGTCATGACTGTAATATCAAGCTTACACGAGAGTTTTAAAAGACTGAGCAGTATCCC
A_33_P3317321	0.007876265	6.783974E-5	up	1.7059838	TPMT	Homo sapiens thiopurine S-methyltransferase (TPMT), mRNA [NM_000367]	CACTGGGGAATACTGACTTCCTAAAATCTCAAGATGGAAGATATACCACATGTAAATTAT
A_23_P47148	0.007876265	6.831218E-5	up	1.7399337	NOX4	Homo sapiens NADPH oxidase 4 (NOX4), transcript variant 1, mRNA [NM_016931]	AGTGCAATTTCTAAGACTTTGAAACTCAGCGGAATCAATCAGCTGTGTTATGCCAAAGAA
A_33_P3216150	0.003949833	1.680385E-5	down	1.1222343	PRB4	Homo sapiens proline-rich protein BstNI subfamily 4 (PRB4), transcript variant 1, mRNA [NM_002723]	GATCTCCTCCAGGAAAGCCACAAGGACCACCCCAACAAGAAGGCAACAAGCCTCAAGGTC
A_33_P3412479	0.015795676	2.6112876E-4	up	1.1945529	HPS1	Homo sapiens Hermansky-Pudlak syndrome 1 (HPS1), transcript variant 3, mRNA [NM_182639]	TTCCCCTGGCGATCAGAGCTCAGGTGAGGACCGGAGGAAAGCAGGAGGAAACAATAGCTA
A_33_P3406962	0.011161759	1.319658E-4	up	1.3168583	GATA4	GATA binding protein 4 [Source:HGNC Symbol;Acc:4173] [ENST00000532977]	TTGCAGGACTCGGCATTCGTTCTGCGCGGGTCACCTTGAATGTCTGTCCGGATCCCTCGC
A_23_P205255	0.016960222	2.938756E-4	down	1.3251334	WDR20	Homo sapiens WD repeat domain 20 (WDR20), transcript variant 7, mRNA [NM_001242417]	GGGACACATTTCTAGCAAGAGCAGTGACAAACTGAATCTAGTTACCAAAACCAAAACGGA
A_33_P3230698	0.012023547	1.5571687E-4	down	2.621183	KIF1A	Homo sapiens kinesin family member 1A (KIF1A), transcript variant 1, mRNA [NM_001244008]	ACTGTGCGTGCACTTGAGGCTCTGTCCAATTAAGAAATAAATGTGGCTCTTACTCAACAC
A_23_P86731	4.876452E-4	7.128064E-8	down	1.5393018	ZNF239	Homo sapiens zinc finger protein 239 (ZNF239), transcript variant 1, mRNA [NM_005674]	ATGCTGTACAATGAATGGATTGTTCTTGTTTCTCAGATGGGTAGAGTAAAAGTGTCTGTA
A_23_P33759	0.01103533	1.2969009E-4	up	2.145256	DHRS3	Homo sapiens dehydrogenase/reductase (SDR family) member 3 (DHRS3), mRNA [NM_004753]	AGGCAGGAAAACAGCCAGAAGCCACCTTGACACTTTTGAACATTTCCAGTTCTGTAGAGT
A_33_P3351559	0.018189624	3.3091477E-4	up	1.511823	ETNK1	Homo sapiens ethanolamine kinase 1 (ETNK1), transcript variant 1, mRNA [NM_018638]	GGATAAAATGAGGTTGGCAGTGAAGAAAATTAAAAACAGCCTCATTCATGTAACTGGTTA
A_33_P3337931	0.010165504	1.1262867E-4	up	2.1139932			CTACCAAAGCTGTGTATTTTTCATTTCTTCATGGCACTGTGCTGTTAATTTCTGTTAACA
A_33_P3420816	0.008805704	8.5842934E-5	up	1.6596552	GDF1	Homo sapiens growth differentiation factor 1 (GDF1), mRNA [NM_001492]	TCTTTGACAACAGCGACAACGTGGTGCTGCGGCAGTATGAGGACATGGTGGTGGACGAGT
A_33_P3352970	0.008384155	7.659867E-5	up	1.4413136	IRAK2	Homo sapiens interleukin-1 receptor-associated kinase 2 (IRAK2), mRNA [NM_001570]	CTGAAAAGTCATGTTGCAAATCTTTCTGTGAAACAGATGCTATTTTAAATTCACTGGGAG
A_33_P3666797	0.0040967725	1.8033596E-5	up	2.6137702	GPR180	Homo sapiens G protein-coupled receptor 180 (GPR180), mRNA [NM_180989]	GGGATCCTCTTACACCTTGCTCTATGTATGTCTTCTTTTGGCTGTTCTGATTTGTATCCT
A_23_P356565	0.008741221	8.355185E-5	down	1.254828	RRP8	Homo sapiens ribosomal RNA processing 8, methyltransferase, homolog (yeast) (RRP8), mRNA [NM_015324]	TGAGGACAAAGTGTGATAAAACCTCTGGCTCAGACTTGCTCTACTGAAGGCTTCTTGGTT
A_23_P134426	0.016796306	2.8679115E-4	up	1.7003886	GPNMB	Homo sapiens glycoprotein (transmembrane) nmb (GPNMB), transcript variant 1, mRNA [NM_001005340]	ACCAGGCATGATGCTGAGTGACACTCTTGTGTATATTTCCAAATTTTTGTACAGTCGCTG
A_23_P307310	0.011788532	1.4741918E-4	down	1.5284357	ACAN	Homo sapiens aggrecan (ACAN), transcript variant 2, mRNA [NM_013227]	CATCCCACCCAGACGGTGTCCTCTTCTTGTCGCTTTTTGTCATATAAGGAATCCCATTAA
A_33_P3380252	0.0040151784	1.745935E-5	down	2.592591			ATTAGGTTGAAGGTGGGATTCTCTCTGGAATAAGTTGTTCCCAAAATTCATGTGTATTTC
A_24_P132950	0.018593052	3.415034E-4	down	1.4551859	NAP1L4	Homo sapiens nucleosome assembly protein 1-like 4 (NAP1L4), mRNA [NM_005969]	ACTTGTACAGTGGCAACTGAAATGCATTTCAGAAATAGGAGGTTTCGTCCAGCACCCTCT
A_23_P44112	0.0015226095	2.35644E-6	down	2.506766	LAT	Homo sapiens linker for activation of T cells (LAT), transcript variant 1, mRNA [NM_014387]	CCTACTCTGTGTAATAGAATAAAGGCCTGCGTGTGTCTGTGTTGAGCGTGCGTCTGTGTG
A_32_P18547	0.0027141506	7.9105575E-6	up	1.4895643	YBEY	Homo sapiens ybeY metallopeptidase (putative) (YBEY), transcript variant 1, mRNA [NM_058181]	TGAATTTCCCCAGCCTGATTTTCCAGATGACTACAATTTGGGAGACATTTTCCTAGGAGT
A_33_P3361758	0.011387031	1.3966687E-4	down	2.3193932	FAM227B	Homo sapiens family with sequence similarity 227, member B (FAM227B), mRNA [NM_152647]	AAAGGCTACCAAGAAACCTCATGAAGTGAAACAGGACTTTGAGAAGTTCCTACATAAACT
A_33_P3286576	0.0076565356	6.3946856E-5	down	1.429537		AY904369 cell cycle-related kinase cardiac splice variant {Mus musculus} (exp=-1; wgp=0; cg=0), partial (12%) [THC2752005]	GCATGTGCCAGATGTGCAGAAAATACTTGCTAATGGAATAAAGGAATGAGTCCCCAGTGA
A_33_P3393460	0.011525802	1.4276878E-4	down	3.8036034	C2orf90	PREDICTED: Homo sapiens chromosome 2 open reading frame 90 (C2orf90), misc_RNA [XR_249068]	GGAATTTGTTGCCTTGCAAGGCAATGTATCTACTTGCTATATAGTTTTCTAATGCAAATC
A_24_P305784	0.008896016	8.698419E-5	down	2.4145243	SPANXB2	Homo sapiens SPANX family, member B2 (SPANXB2), mRNA [NM_145664]	AACCCCGACCAAATGGAGGAGGAGGAATTCATAGAAATAACGACTGAAAGACCTAAAAAG
A_23_P218770	0.0028894437	9.837007E-6	down	1.7965299	RAC2	Homo sapiens ras-related C3 botulinum toxin substrate 2 (rho family, small GTP binding protein Rac2) (RAC2), mRNA [NM_002872]	ATATCTGCTCAGCCAATGGAAAATCTGGGTTCAACCAGCCCCTGCCATTTCTTAAGACTT
A_23_P92467	0.007121245	5.557065E-5	up	1.8035034	QRFPR	Homo sapiens pyroglutamylated RFamide peptide receptor (QRFPR), mRNA [NM_198179]	GATGATGTCACAATCAAGATGATTTTTGCTATCGTGCAAATTATTGGATTTTCCAACTCC
A_23_P62752	0.017096067	3.0017068E-4	down	2.3887086	NPPB	Homo sapiens natriuretic peptide B (NPPB), mRNA [NM_002521]	CTGCTTCTGATTCCACAAGGGGCTTTTTCCTCAACCCTGTGGCCGCCTTTGAAGTGACTC
A_24_P681301	0.006055422	3.999468E-5	down	1.2361981	UBC	Homo sapiens ubiquitin C (UBC), mRNA [NM_021009]	GCACCCTGTCTGACTACAACATCCAGAAAGAGTCCAGCCTGCACCTGGTGCTCCGTCTTA
A_23_P431388	0.008384155	7.673642E-5	down	4.2974086	SPOCD1	Homo sapiens SPOC domain containing 1 (SPOCD1), transcript variant 1, mRNA [NM_144569]	TGTTTGAACTTCCTGTTTGACAATGTTTGCTGTTGATTTTTTGTTCAATAAAGAATTTGG
A_33_P3242109	0.018060317	3.2608642E-4	up	1.3307705	LOC100130219	Homo sapiens cDNA clone IMAGE:4752264, partial cds. [BC039168]	GAGTGGTTTTTGGTCATTGTTTAGCCATATACAATATTGTCTTACCTTCTGCATTTGAAG
A_19_P00803333	0.019703234	3.8104257E-4	down	1.6222585	ZSWIM6	Homo sapiens zinc finger, SWIM-type containing 6 (ZSWIM6), mRNA [NM_020928]	TTTGGCGGCAACAAGGCACTGCAATGACTGACAAATACAGGCAGCTCTGGGATGAGCTGG
A_19_P00320348	0.010244102	1.1437181E-4	up	1.3472637			TTCAGAGATGAATGATCCACGTTGCCTTCTCCACACACACTGCTTTCACATGGTTTTACC
A_33_P3784253	0.005152257	2.9903382E-5	up	1.766178	PAK1	Homo sapiens p21 protein (Cdc42/Rac)-activated kinase 1 (PAK1), transcript variant 1, mRNA [NM_001128620]	CTCAAGACTTTGATCCTTGGAAACCGTGTGTCCAGCATTGAAGAGAACTGCAACTGAATG
A_24_P364236	0.011002221	1.2904238E-4	up	2.2540455	NDUFC2	Homo sapiens NADH dehydrogenase (ubiquinone) 1, subcomplex unknown, 2, 14.5kDa (NDUFC2), transcript variant 1, mRNA [NM_004549]	AAATCAAATGATTTCTGTCTCTATTTTCTTGAGTACCAATTGTAAAAACTGAAATTAGGT
A_23_P78372	0.0010583713	9.4091115E-7	up	1.4481695	THOC1	Homo sapiens THO complex 1 (THOC1), mRNA [NM_005131]	CTGATGGATTTACAACTGAGTGACAGTAACTTTCGTCGACACATCCTGTTGCAGTATCTC
A_19_P00315583	0.0069809253	5.3819334E-5	up	1.7330455	LOC100130691	Homo sapiens uncharacterized LOC100130691 (LOC100130691), long non-coding RNA [NR_026966]	GCACGTCCTCATTATATGTAAGGAATCTATTTCCTAGAATCCTATAAAAAGCTCAAGTGA
A_33_P3241269	0.0013597859	1.9815895E-6	up	2.8155205	CES1	Homo sapiens carboxylesterase 1 (CES1), transcript variant 1, mRNA [NM_001025195]	AGGAGCAAGTTTTGTATTTGTGACCTCAGCTTTGGGAATAAAGGATCTTTTGAAGGCCAA
A_23_P251562	0.003984245	1.7231192E-5	up	1.5512946	TUSC2	Homo sapiens tumor suppressor candidate 2 (TUSC2), mRNA [NM_007275]	CTCTGTGCTTCTATAATGTGGGAAATGGCTTGGGGAGGATGGCCCCTAGCTTAGGAAGAC
A_23_P253421	0.010484895	1.1971339E-4	up	1.1880093	AUP1	Homo sapiens ancient ubiquitous protein 1 (AUP1), mRNA [NM_181575]	GCTTCGTCCTGTTCATCGCCAACTAGGGGAAGCGAATGAGGAGTTTGCACTCCGTGTACA
A_33_P3215948	0.011288072	1.3704564E-4	up	2.7536912	MPZL2	Homo sapiens myelin protein zero-like 2 (MPZL2), transcript variant 1, mRNA [NM_005797]	GTAATATGGGCCTGTTGTTTAGTGTCTCCTTCCTAAAGAGCACTTTTGTATTGTAATTTA
A_33_P3342081	0.008460045	7.775009E-5	down	2.319738	PRDM1	Homo sapiens PR domain containing 1, with ZNF domain (PRDM1), transcript variant 1, mRNA [NM_001198]	CCTCTACTCAAAGTTAAAACTGACCAAAGTTACTGGCTTTTTACTTTGCTAGAACAACAA
A_23_P164387	0.012794967	1.7803785E-4	up	1.2701107	SMARCE1	Homo sapiens SWI/SNF related, matrix associated, actin dependent regulator of chromatin, subfamily e, member 1 (SMARCE1), mRNA [NM_003079]	ATCCCATAGACCAGAGCCCACCTTTTTGATAAACTTAGTAAAGTCTTGGAGACTAGAAGC
A_19_P00332220	0.008057083	7.1016715E-5	up	1.604907	C14orf132	Homo sapiens chromosome 14 open reading frame 132 (C14orf132), transcript variant 2, mRNA [NM_001252507]	CTGTGAAATCTCACTTTGTTAGCGTTGCTGCTGTTGTCATTTTCTATTATGATAACTGAA
A_23_P24083	0.012079292	1.572006E-4	up	2.0568843	PNLIPRP2	Homo sapiens pancreatic lipase-related protein 2 (PNLIPRP2), transcript variant 1, mRNA [NM_005396]	TAGCAGCGACACTGTGGAAGAAAACGTCTTGCAATCTCTTTACCCTTGTTAAAAACGTGG
A_23_P28815	6.965165E-4	1.9699942E-7	up	1.8695517	CYP24A1	Homo sapiens cytochrome P450, family 24, subfamily A, polypeptide 1 (CYP24A1), transcript variant 1, mRNA [NM_000782]	AACAGCTAAATTTTCTGGGGCTGGGAGTAATACTGACAATCCATTTACTGTAGCTCTGCT
A_33_P3423585	0.014540864	2.2796466E-4	up	3.265037	UNC13C	Homo sapiens unc-13 homolog C (C. elegans) (UNC13C), mRNA [NM_001080534]	AGTGTGATGCGATCCTCTGGCATATGCTTTAATAAATGGATGTATATTGAGCACATGCAG
A_23_P381368	0.0040967725	1.8705226E-5	up	1.9409559	HOXD10	Homo sapiens homeobox D10 (HOXD10), mRNA [NM_002148]	TGCTGGAGGACTGGGAAAGCGGAAACAAAACCTTCACCGCTCTTTGTTTGTTGTTTTGTT
A_33_P3212112	0.012773252	1.7633896E-4	down	1.2132185	SLC12A6	Homo sapiens solute carrier family 12 (potassium/chloride transporter), member 6 (SLC12A6), transcript variant 5, mRNA [NM_001042496]	GAGATGCTGCAACAGTTCTTGATTTAGCAGCAGTTATTCTCTTGTTTACATAGTTATGTT
A_32_P133884	0.010484895	1.19956625E-4	down	1.2942117	TUSC1	Homo sapiens tumor suppressor candidate 1 (TUSC1), mRNA [NM_001004125]	GAGGGATGAGTAATGTGTTTTTAGTTGGTTGAGTTTATCCATTCTTCAATCCCCTAAAGC
A_33_P3312246	0.008071415	7.14052E-5	down	1.7500039	PHIP	Homo sapiens pleckstrin homology domain interacting protein (PHIP), mRNA [NM_017934]	TACACAAGAAAAGGGGTAGAAAGCCCAAAAAGCTACAGTATGCAAAGCCAGAAGATTTAG
A_33_P3273136	0.013028001	1.8232966E-4	down	1.2043132	MCUR1	Homo sapiens mitochondrial calcium uniporter regulator 1 (MCUR1), mRNA [NM_001031713]	TCTGGGAGCAGGAAACTCTACTTCGACACTCATGCCTTAGTGTGCTTACTGGAAGACAAT
A_24_P89891	0.0010857984	1.1229317E-6	up	2.9789045	TRAF1	Homo sapiens TNF receptor-associated factor 1 (TRAF1), transcript variant 1, mRNA [NM_005658]	GATGAGATGATAATTTAAGACACTGAATGATTTCTTTTCCAACAAAGCTCTATGTTAAGT
A_33_P3336622	0.013496366	1.9509379E-4	up	1.1925447	ALDH3A2	Homo sapiens aldehyde dehydrogenase 3 family, member A2 (ALDH3A2), transcript variant 1, mRNA [NM_001031806]	CTCAGATATACCCTATTGGAGACAATCCTTTGATCATAAATTCTCCCCAACTATAAATCA
A_19_P00321872	0.0026611327	6.9569837E-6	down	1.5903417	LINC00958	Homo sapiens long intergenic non-protein coding RNA 958 (LINC00958), long non-coding RNA [NR_038904]	ATTTCTACAAATATTTCGACATCTCCATATACTCACTCCTTTCCCCCCTGAGTGGAGAGA
A_33_P3402171	0.019405965	3.67183E-4	up	1.2143608	EIF2S1	Homo sapiens eukaryotic translation initiation factor 2, subunit 1 alpha, 35kDa (EIF2S1), mRNA [NM_004094]	CAGGAATGCTGGCAATAGCTTGTGCCAGATTACTGTATAAACTTGAAAGTAATAAAAATG
A_33_P3275315	0.005152257	2.9678302E-5	up	3.300353	CELF2-AS1	CELF2 antisense RNA 1 [Source:HGNC Symbol;Acc:23515] [ENST00000379256]	AGAGTGCCAGATACACAGGTGGCATTTTATGGCAGTGGTCACTGGGACCCAACTCCCTTC
A_23_P404059	0.0026611327	6.580275E-6	up	6.1599364	PASD1	Homo sapiens PAS domain containing 1 (PASD1), mRNA [NM_173493]	GGGTAGAGACTTATTTGTTTCCTGATAGGTTATGTTTGTAATTGTTTGTTAAGCACAGCC
A_23_P92261	0.0055438974	3.3664703E-5	up	1.4392129	ECE2	Homo sapiens endothelin converting enzyme 2 (ECE2), transcript variant 3, mRNA [NM_032331]	GAATTCCTGACTTAGGACTTGGGGTTGGGTCCAAGGTGCTTACATCCCAGGGGCCTCATG
A_23_P415706	0.01447968	2.2496341E-4	up	2.0405688	GPR133	Homo sapiens G protein-coupled receptor 133 (GPR133), mRNA [NM_198827]	GAACTATCTTTAGTTTAGATGGAATTATTTGTTTTTAATTGTTGCCGTATTCATCTATAT
A_33_P3316323	0.019112254	3.5893032E-4	up	1.3883876	RBMS1	Homo sapiens RNA binding motif, single stranded interacting protein 1 (RBMS1), transcript variant 1, mRNA [NM_016836]	GCATAAAACCCTTAAATTCATCTAGTAGCTGTTCCCCCGAACAGGTTTATTTTAGTAAAA
A_23_P132889	0.014447946	2.241308E-4	down	1.52708	CRMP1	Homo sapiens collapsin response mediator protein 1 (CRMP1), transcript variant 1, mRNA [NM_001014809]	GTACTAGTGTGGTGTGTTTGCTTGGAAATTCCTTGCCCCACAGTTGTGTTCATGCTGAAT
A_33_P3227793	0.010165504	1.1198104E-4	up	2.1945443	CGREF1	Homo sapiens cell growth regulator with EF-hand domain 1 (CGREF1), transcript variant 1, mRNA [NM_006569]	AAGAACACCCAAAATGACTTTGAGGTGCACATTGTTCAAGTGGAGAATGATGAGATCTAG
A_23_P89884	0.019772172	3.8321127E-4	down	1.7257224	TRIM28	Homo sapiens tripartite motif containing 28 (TRIM28), mRNA [NM_005762]	AGTTTGCCCAGGATGTGGGCCGCATGTTCAAGCAATTCAACAAGTTAACTGAGGACAAGG
A_23_P154962	0.01226282	1.6285095E-4	down	2.893109	RIMBP3	Homo sapiens RIMS binding protein 3 (RIMBP3), mRNA [NM_015672]	TTGCTGATAACTATGGCAGGTATACGGAGAAGCGCCTTTTTCTGTGGCCAATGTGTGTTT
A_23_P141306	0.011161759	1.3275491E-4	up	1.7139041	GLP2R	Homo sapiens glucagon-like peptide 2 receptor (GLP2R), mRNA [NM_004246]	AGATCCTCTTCTCTTTCATCACTGATGATCAAGTTGAAGGATTTGCAAAACTTATACGAC
A_19_P00317128	0.010190852	1.1329823E-4	up	1.2265428	LINC00963	long intergenic non-protein coding RNA 963 [Source:HGNC Symbol;Acc:48716] [ENST00000444184]	ATGCAAGGGGGGAAGATAGAAGAACAAAATTTCACCCTAATGTAGTGTCTTTAGACCGTG
A_33_P3406066	0.011874455	1.5106781E-4	down	1.4327376	ZNF776	Homo sapiens zinc finger protein 776 (ZNF776), mRNA [NM_173632]	ATATAACATGTTTCCTCTTTTCATACCTGAGTACTCTCCTGAGCCCTATTTATTTAGATG
A_23_P112162	0.013407575	1.922346E-4	up	1.4341878	DGAT1	Homo sapiens diacylglycerol O-acyltransferase 1 (DGAT1), mRNA [NM_012079]	GGACAGCCAATAGCCGTCCTCATGTACGTCCACGACTACTACGTGCTCAACTATGAGGCC
A_23_P250516	0.0026611327	6.8445293E-6	up	1.6163567		PREDICTED: Homo sapiens uncharacterized LOC101928710 (LOC101928710), misc_RNA [XR_243765]	CTGCATCCTTTCCAGCAAGATGTCATTCTGAGATTTTTGTCATTCCTGGGCGTTATGAGG
A_24_P142118	0.0042110435	1.9894695E-5	down	2.055666	THBS1	Homo sapiens thrombospondin 1 (THBS1), mRNA [NM_003246]	AATAAGCTGCTCTGCCCCTTGTGCTCAGAGTGGATGTTATGGGATTCCTTTTTTCTCTGT
A_23_P431410	0.0026611327	6.8162603E-6	up	1.4124135	RBMS1	Homo sapiens RNA binding motif, single stranded interacting protein 1 (RBMS1), transcript variant 1, mRNA [NM_016836]	GAGGGGAAATCTGCTGCTAGAAATGTCTGAACTAAGTGCCATACTCGTCTGGGTAAGATT
A_23_P144369	0.013577457	1.9794241E-4	up	2.3827393	NAP1L5	Homo sapiens nucleosome assembly protein 1-like 5 (NAP1L5), mRNA [NM_153757]	TAGCAAATTATGTAAAGCATGTGTATCCAGCGTTATGTACTTTGCGCCTTGTGACGTCTT
A_33_P3344831	0.012782412	1.7704922E-4	down	1.7658509	TMEM45A	Homo sapiens transmembrane protein 45A (TMEM45A), mRNA [NM_018004]	CTACTATTTGTAACTCCTTGACCATGGAATTATACTTGTTTATCTTGTTGCTGCAATGAG
A_23_P205875	0.011462819	1.4107011E-4	up	1.3472185	SCAND2P	Homo sapiens SCAN domain containing 2 pseudogene (SCAND2P), transcript variant 1, non-coding RNA [NR_004859]	TGTGGGAAGCATTCAGGCTCAGAATCAGGAGATGTGATTATTGTCCTGGCTCTGTTATGA
A_33_P3358621	0.018301368	3.3423817E-4	up	1.8192822	LOC100506036	PREDICTED: Homo sapiens uncharacterized LOC100506036 (LOC100506036), misc_RNA [XR_109916]	ACTCCAACTTTGAAACCACTAGCCTGTAGGTGTGGACGAAAAGGCAGCTGCATGTTATAA
A_23_P148541	4.876452E-4	5.8261644E-8	down	5.2393007	CTAG1A	Homo sapiens cancer/testis antigen 1A (CTAG1A), mRNA [NM_139250]	TGATTGTTTGTCGCTGGAGGAGGACGGCTTACATGTTTGTTTCTGTAGAAAATAAAACTG
A_23_P193	0.013028001	1.8266802E-4	down	1.3802605	EXO5	Homo sapiens exonuclease 5 (EXO5), mRNA [NM_022774]	TTTTTTATTTCCACAACCTCTAACCACATTCAGTCCAGGACCAAGGCTCAGGGATGAGTG
A_32_P83845	0.0068290303	5.1203682E-5	up	1.8217874	HEY1	Homo sapiens hes-related family bHLH transcription factor with YRPW motif 1 (HEY1), transcript variant 2, mRNA [NM_001040708]	GGGCTATAAAATATCATTTTTCAGGTTTATTCTTTTAGCAGGTGTAGTTAAACGACCTCC
A_24_P943193	0.0085312715	7.909657E-5	up	1.493767	PREPL	Homo sapiens prolyl endopeptidase-like (PREPL), transcript variant 1, mRNA [NM_006036]	GTCTCATATAATGCTTTTCATATTGAACTATATTTTGTCTGCTATTAAATACTTCCAAGC
A_33_P3271490	0.015795676	2.6208058E-4	up	1.2085283	RBMS1	Homo sapiens RNA binding motif, single stranded interacting protein 1 (RBMS1), transcript variant 1, mRNA [NM_016836]	GTAAAACAGCAGCATAGGGCTTTTAAAAGGTAGTCAATAAAAGTTGCTGAAATTTTGGCT
A_33_P3857239	0.0026611327	6.9538723E-6	down	1.7902433	KRT42P	Homo sapiens keratin 42 pseudogene (KRT42P), non-coding RNA [NR_033415]	CAACCTGGAGATGCAGCCTGAGAACCTCAAGGAGGACCTGGTCTACCTGAAGAAGAACCA
A_23_P86330	0.015820986	2.636521E-4	down	1.7837979	IER5	Homo sapiens immediate early response 5 (IER5), mRNA [NM_016545]	ATGGTGACTCCAGTCTTTGTTGTATAAAGGTTGGGGGAGCTGATAAGGTTTTTGTACAGT
A_23_P94754	0.011036213	1.2995987E-4	up	1.8843596	TNFSF15	Homo sapiens tumor necrosis factor (ligand) superfamily, member 15 (TNFSF15), transcript variant 1, mRNA [NM_005118]	AAACAGTATAAACTTTCAGAGGCAAAATCCTTCACCAATTTTTCCACATACTTTCATGCC
A_33_P3385775	0.008693278	8.254987E-5	down	1.9139268	ZNF703	Homo sapiens zinc finger protein 703 (ZNF703), mRNA [NM_025069]	TTTATTTACTATAATGTTAGCTTACAAGCTGGGAATATAAGTGCATTAACGGCCCACATG
A_19_P00803558	0.0060225856	3.884085E-5	up	1.6990331	KCNA6	Homo sapiens potassium voltage-gated channel, shaker-related subfamily, member 6 (KCNA6), mRNA [NM_002235]	CAACCAAGCCAGAAAAAGTTGAGACCAGACCCGTTGTCCCTAAAGATGGGGCCCAGAATG
A_33_P3399090	0.00906995	9.01772E-5	up	2.1378174	DIXDC1	Homo sapiens DIX domain containing 1 (DIXDC1), transcript variant 1, mRNA [NM_001037954]	GTGATAACCAGTTTTAACTGCCGGTATGTACCAGATTTGTGAACTAATTTAAAAAACCAC
A_24_P286054	0.011788532	1.4768569E-4	down	1.3152448	ZFYVE16	Homo sapiens zinc finger, FYVE domain containing 16 (ZFYVE16), transcript variant 2, mRNA [NM_001105251]	GTGTATGTATTCTGCCATGTAAGTAATTGAACAGTCTTAAAATAACCAAATGGTAGAGGG
A_24_P95822	0.010832629	1.2527098E-4	down	1.4791443	NPTN	Homo sapiens neuroplastin (NPTN), transcript variant b, mRNA [NM_012428]	GGATGCCCATGGACATTGTCAATACCTCTGGCCGCTTCTTCATCATCAACAAGGAAAATT
A_33_P3336652	0.013473821	1.9350111E-4	up	1.6130031	NDUFC2	Homo sapiens NADH dehydrogenase (ubiquinone) 1, subcomplex unknown, 2, 14.5kDa (NDUFC2), transcript variant 2, mRNA [NM_001204054]	TCCTCTACATCGGCTTCTTGGGCTACTGCTCCGGCCTGATTGATAACCTAATCCGGCGGA
A_33_P3301524	0.010631706	1.2219777E-4	up	1.2470063	XRCC3	Homo sapiens X-ray repair complementing defective repair in Chinese hamster cells 3 (XRCC3), transcript variant 1, mRNA [NM_001100119]	TGCCTCCACATGCTGCCTGGCACAGACCAGGCCTTTGACAAATAAATGTTCAATGGATGC
A_23_P353014	8.632388E-4	4.0224546E-7	down	5.316965	CACNA2D4	Homo sapiens calcium channel, voltage-dependent, alpha 2/delta subunit 4 (CACNA2D4), mRNA [NM_172364]	TAGGCTGAGACATCCAATTGCTGCATGGAAATTGATGTACATTCAGGGGACGGCAAAAAT
A_24_P101101	0.006576568	4.5909994E-5	up	1.2199458			ATCAGCCTCACAAAGTGACACAGTATAAGAGCAAGGATTCCTTGTATGCCCAGGGAAAGA
A_19_P00322793	0.011279095	1.3600131E-4	up	1.1646657	LINC00963	long intergenic non-protein coding RNA 963 [Source:HGNC Symbol;Acc:48716] [ENST00000444184]	ATTCTCCAGACTTGCCAAAATGCTCAGCGCAGGCCTCGTCGGCAACTGCAGACAAGCAGA
A_23_P40880	0.014274331	2.180507E-4	up	1.3206915	CMTM8	Homo sapiens CKLF-like MARVEL transmembrane domain containing 8 (CMTM8), mRNA [NM_178868]	GCTACGCTGGAAATACATATTTCAGTTTTATAGCATGGAGATCCAGGACCATACAGTGAT
A_23_P339818	0.0075678574	6.261337E-5	up	1.7275826	ARRDC4	Homo sapiens arrestin domain containing 4 (ARRDC4), mRNA [NM_183376]	GCACAGTAAGAAACAATAGGCAAGCGTTATGTTTTTGGTAAGTTAACTATGAAAGCTTTC
A_23_P151970	0.0028666416	9.338936E-6	down	1.3472399	FEM1B	Homo sapiens fem-1 homolog b (C. elegans) (FEM1B), mRNA [NM_015322]	CCCAGAACTCTTGAAGAGTTTGTTGGATTTCATTAAGTGACTGGATATGTAAAGTCGTTT
A_24_P228717	0.009846944	1.0461438E-4	down	1.6770169	RAC2	Homo sapiens ras-related C3 botulinum toxin substrate 2 (rho family, small GTP binding protein Rac2) (RAC2), mRNA [NM_002872]	CAAGGAGATTGACTCGGTGAAATACCTGGAGTGCTCAGCTCTCACCCAGAGAGGCCTGAA
A_33_P3217213	0.014713555	2.3170952E-4	down	1.4698849	PDLIM7	Homo sapiens PDZ and LIM domain 7 (enigma) (PDLIM7), transcript variant 1, mRNA [NM_005451]	ACCATGCTATGACGTGCGCTATGCACCCAGCTGTGCCAAGTGCAAGAAGAAGATTACAGG
A_23_P41424	0.010313914	1.158785E-4	up	1.4855127	SLC39A8	Homo sapiens solute carrier family 39 (zinc transporter), member 8 (SLC39A8), transcript variant 1, mRNA [NM_022154]	GGAAAATGATTGACAAAGCCCAACAATGATCTCAGGAATTACATTTTCCAACAGACCAAA
A_19_P00809611	0.002681902	7.4284108E-6	down	1.2975993			TTTCGACAAACTCTGCTCTGGTCTCAGCCTCCTTCAGTTTCTCCTCCAGCAGTTTCATCT
A_24_P915692	0.002327828	5.088448E-6	down	1.6700675	PHLDA1	Homo sapiens pleckstrin homology-like domain, family A, member 1 (PHLDA1), mRNA [NM_007350]	TACAGGATCTAAAAGGGTTTTCTTAGAAAGGGCAATATTGTCCAATGAAGTAAGCAGAAG
A_24_P315444	0.011676663	1.4546083E-4	down	1.3093443			TTGGAGAGATTTAAAGGATTTTATGCGACAAGCAGGTAAGACCTGTGCGGATGCCCACAA
A_33_P3264846	0.017591882	3.1507848E-4	down	2.2203972	SAMD9L	Homo sapiens sterile alpha motif domain containing 9-like (SAMD9L), mRNA [NM_152703]	ATACCAGTAATATCTGTTTATTCAGGTCCACTCAGAAGTGGTAGGAACATAGAAAGAGTG
A_23_P143029	0.0025699453	5.7989128E-6	up	1.8961573	HOXD11	Homo sapiens homeobox D11 (HOXD11), mRNA [NM_021192]	AAAGAAAAGAAACTGAACAGAGACCGTCTGCAGTATTTCACTGGAAACCCCTTATTTTGA
A_33_P3286859	0.01883236	3.5057537E-4	down	1.5148243	ATP8A2	Homo sapiens ATPase, aminophospholipid transporter, class I, type 8A, member 2 (ATP8A2), mRNA [NM_016529]	AGTCAGGAAGAAGTCATCCGTGCTTATGACACCACCAAAAAGAAATCCAGGAAGAAATAA
A_33_P3369401	0.0011272369	1.2935227E-6	up	2.3214445	CYP24A1	Homo sapiens cytochrome P450, family 24, subfamily A, polypeptide 1 (CYP24A1), transcript variant 1, mRNA [NM_000782]	GAAAAAGAATGTGCATTGGTCGCCGATTAGCAGAGCTTCAACTGCATTTGGCTCTTTGTT
A_33_P3359543	0.011161759	1.3250057E-4	up	1.4111009	ZNF561	Homo sapiens zinc finger protein 561 (ZNF561), mRNA [NM_152289]	TCAAGTACCTAGAACTGTTCCTGGCCAATGATGGTATGTAATAAATACTTCAATGAAATG
A_19_P00805625	0.014447946	2.2393491E-4	up	1.2872788	LINC00963	long intergenic non-protein coding RNA 963 [Source:HGNC Symbol;Acc:48716] [ENST00000444184]	CATGATAGAAGACAGGCAGGGATGCCACAATCATAACCATGGCAAAGACCAGGATCAGAA
A_23_P90333	0.0014013432	2.108026E-6	down	3.2086816	ZNF404	Homo sapiens zinc finger protein 404 (ZNF404), mRNA [NM_001033719]	GTAAAGAATGTGATAAGGCCTTTAATCGCAGTGATCGACTTACTCAACATGAGACAATTC
A_23_P62607	0.006866167	5.2127674E-5	up	2.1750207	IL22RA1	Homo sapiens interleukin 22 receptor, alpha 1 (IL22RA1), mRNA [NM_021258]	ACCTACCTCATGGAGATTGTGGTGAAGATGAAATGAAGTCATGTCTTTAAAGTGCTTAAT
A_33_P3374210	0.011279095	1.3597732E-4	up	2.9665663	MKI67	Homo sapiens marker of proliferation Ki-67 (MKI67), transcript variant 1, mRNA [NM_002417]	ATAAATGCTCTGCAAGCCCTCCCTTAAGACGGCAGTGTATTAGAGAAAATGGAAACGTAG
A_23_P201386	0.002681902	7.603688E-6	up	2.223966	DDAH1	Homo sapiens dimethylarginine dimethylaminohydrolase 1 (DDAH1), transcript variant 1, mRNA [NM_012137]	TGATTGGTCTTTTCAGCTACTCTGAACAGATTACTAAGGCCATCTCCTCATCTCTAAGGG
A_23_P13094	0.013842091	2.063244E-4	up	4.3333077	MMP10	Homo sapiens matrix metallopeptidase 10 (stromelysin 2) (MMP10), mRNA [NM_002425]	ATGTATTATGAGCCAAAATGGTTAATTTTTCCTGCATGTTCTGTGACTGAAGAAGATGAG
A_19_P00330027	0.016671507	2.8252805E-4	down	1.1364053			TGGAGCGTTCATGTCAGAGACTGCCAGAAAAGCCTTACCGATTTTGCTTTTCGCTATTGA
A_24_P72364	0.019552186	3.7443693E-4	down	5.340757	C6orf15	Homo sapiens chromosome 6 open reading frame 15 (C6orf15), mRNA [NM_014070]	TACCAGCTGGGGAAATATTAATCGGTATCCAGGAGGCAGCTGGGGAAATATTAATCGGTA
A_24_P133488	0.0022325912	4.568402E-6	down	1.2553706	CDCA4	Homo sapiens cell division cycle associated 4 (CDCA4), transcript variant 1, mRNA [NM_017955]	TATGTAAATGTCATTGAAGACAAAGGTCAAATATTTGTCTGTTTGTAGATCACAGGCACC
A_24_P259607	0.013629523	2.0054252E-4	down	1.5216881	SUSD4	Homo sapiens sushi domain containing 4 (SUSD4), transcript variant 1, mRNA [NM_017982]	CATCTCATGATGGAGACAGTAACCAAGGTAATGTTTTGTTTCAGCATTTTAAAAAGACTC
A_23_P204277	0.008741221	8.4510306E-5	up	1.4584751	H2AFJ	Homo sapiens H2A histone family, member J (H2AFJ), transcript variant 1, mRNA [NM_177925]	AGCTGGCTCCCCCAGCAAAGGCCCTTTTCATGGTCGTCCCGCAATGCTTTTGAATGTGCT
A_24_P391230	0.0038296513	1.5985988E-5	up	2.0830379	CYYR1	Homo sapiens cysteine/tyrosine-rich 1 (CYYR1), mRNA [NM_052954]	TTGTATTAAGTGTCATAATAGCATCAATGTGCACATTACCAGTATAGACTGTTGGAGTTC
A_32_P105549	0.0060225856	3.869346E-5	down	2.4025433	ANXA8L2	Homo sapiens annexin A8-like 2 (ANXA8L2), mRNA [NM_001630]	GGCAACTGAGACTGGGTACCTGGAGATTCTGAAGTGCCTTTGCTGTGGTTTTCAAAATAA
A_24_P379233	0.013675174	2.0164701E-4	up	1.5886923	GJB3	Homo sapiens gap junction protein, beta 3, 31kDa (GJB3), transcript variant 1, mRNA [NM_024009]	ACCCCACTCTGAGTTCACTAAGTTATGCAACTTTCGTTTTGGCAGATATTTTTTGACACT
A_23_P9883	0.017390113	3.0975533E-4	down	2.1850817	NLRP3	Homo sapiens NLR family, pyrin domain containing 3 (NLRP3), transcript variant 3, mRNA [NM_001079821]	TGTTGTTGTCATCACAGCGCCTCAGTTAGAGGATGTTCCTCTGGTGACCTCATGTAATTA
A_23_P47579	0.0076565356	6.406691E-5	down	2.050345	NLRP14	Homo sapiens NLR family, pyrin domain containing 14 (NLRP14), mRNA [NM_176822]	ATGTTGTCTGGATCTGGCTTCTGTTATTTTGAATAACCCAAACCTGAGGAGCCTGGACCT
A_32_P40288	0.015230604	2.470118E-4	down	1.8409227	TMEM200A	Homo sapiens transmembrane protein 200A (TMEM200A), transcript variant 4, mRNA [NM_052913]	CAATCGGCTAACCTTGACATTTCTTTTTACCTTCATATGCCACTATCTCGGTAGTTCAAA
A_33_P3418527	3.5382796E-4	8.316558E-9	down	9.4897175	OR10A6	Homo sapiens olfactory receptor, family 10, subfamily A, member 6 (OR10A6), mRNA [NM_001004461]	TTGTCTTACTCACTTCTGACACCACTGCTGAATCTGCTTATCTACAGTTTGCGAAATAGT
A_23_P414252	0.018269947	3.3280547E-4	up	1.1971245	SNX8	Homo sapiens cDNA, FLJ96764, highly similar to Homo sapiens sorting nexin 8 (SNX8), mRNA. [AK315670]	CATCGTGGAGCAGGAGAACGCGATTCAGACGATGGAGCTGCGGAACTACTTCTCCCTGTA
A_23_P8834	0.013989	2.1188993E-4	up	1.8553001	EPHX2	Homo sapiens epoxide hydrolase 2, cytoplasmic (EPHX2), transcript variant 1, mRNA [NM_001979]	TGGCCTTACACACATCTTGCATGGATGGCAGCATTGTTCTGAAGGGGTTTGCAGAAAAAA
A_23_P331748	0.011285957	1.3661459E-4	down	1.3883426	CD33	Homo sapiens CD33 molecule (CD33), transcript variant 1, mRNA [NM_001772]	GGGACCAAAGGCTGATTCTTGGAGATTTAACTCCCCACAGGCAATGGGTTTATAGACATT
A_33_P3259403	0.015706249	2.5804836E-4	down	2.4216533	PAN3	Homo sapiens PAN3 poly(A) specific ribonuclease subunit homolog (S. cerevisiae) (PAN3), mRNA [NM_175854]	TACTTTTCAAGAACTGATTGCAGCTGCAAATGGTCAGTTGTAGTATTTGCTAAAAAAGCA
A_23_P206759	0.019249832	3.62419E-4	down	1.24255	IST1	Homo sapiens increased sodium tolerance 1 homolog (yeast) (IST1), transcript variant 2, mRNA [NM_014761]	AATTTCTCCTTGTAACAAAGAATCTCCATGAAATTCTGTTTCATCTGTTAACCGTCACTC
A_23_P426472	0.0073173423	5.9264334E-5	down	2.0274093	ZNF45	Homo sapiens zinc finger protein 45 (ZNF45), mRNA [NM_003425]	AGCTGATACATGCAGACAAGAGGATCAGGAAGGATGAGTCTGATCTGGAGTAAATCAGAA
A_23_P87310	0.0059790625	3.7944457E-5	up	1.6403713	LMO1	Homo sapiens LIM domain only 1 (rhombotin 1) (LMO1), transcript variant 1, mRNA [NM_002315]	CCCTCCTGGGGCCAGGCCGGGCCTGTACAGTCTGTCTTCTGTATATACATGGGAACATTT
A_32_P18440	0.016805107	2.879521E-4	down	1.3494644	ARID5B	Homo sapiens AT rich interactive domain 5B (MRF1-like) (ARID5B), transcript variant 1, mRNA [NM_032199]	GAGCACTTAAAGTCCAGTGTTGGCTGTTAGTGTATTTGATATTCTGCCTGTCTCCTCATG
A_24_P25234	0.008741221	8.43159E-5	up	2.7882676	MTL5	Homo sapiens metallothionein-like 5, testis-specific (tesmin) (MTL5), transcript variant 2, mRNA [NM_001039656]	TATCTCGACATCTGCAATACTGATGATATACTGGAATCTCTACCAATTTATTTTTGGTGG
A_32_P118586	8.632388E-4	5.478305E-7	up	1.8371488	DENND6A	Homo sapiens DENN/MADD domain containing 6A (DENND6A), mRNA [NM_152678]	AATCACTGCTTTAAGGGTATTATGTAATGCCTAGTGCCTTCTATTTACAGTGAAAAAGAG
A_23_P124733	0.017309843	3.0514473E-4	down	1.2000284	COQ2	Homo sapiens coenzyme Q2 4-hydroxybenzoate polyprenyltransferase (COQ2), mRNA [NM_015697]	TCAACTAGCCTTGGGCTTGACATTTAATTGGGGAGCGTTACTTGGATGGTCTGCTATCAA
A_33_P3421515	0.00764283	6.34133E-5	down	1.4134878			CCCAGGAAATACACTAGCAAATTGTGCAATGGAATAAAATCCACACTTTACTTTAGATTC
A_24_P355493	0.019971889	3.915044E-4	up	1.5203277	LHPP	Homo sapiens phospholysine phosphohistidine inorganic pyrophosphate phosphatase (LHPP), transcript variant 1, mRNA [NM_022126]	TGGAGCTGGAAAAACCTGTGCTCATATCACTGGGAAAAGGGCGTTACTACAAGGAGACCT
A_23_P134295	0.0026611327	6.280549E-6	up	1.1838489	NUDT1	Homo sapiens nudix (nucleoside diphosphate linked moiety X)-type motif 1 (NUDT1), transcript variant 2B, mRNA [NM_198949]	AATTCCACGGGTACTTCAAGTTCCAGGGTCAGGACACCATCCTGGACTACACACTCCGCG
A_19_P00321076	0.0019319487	3.4511247E-6	up	1.3693651	PVT1	Homo sapiens Pvt1 oncogene (non-protein coding) (PVT1), long non-coding RNA [NR_003367]	ACAGAATAACGGGCTCCCAGATTCACAAGCCCCACCAAGAGGATCACCCCAGGAACGCTT
A_33_P3227944	0.011644231	1.4478313E-4	up	1.4135325	CRHR1-IT1	Homo sapiens CRHR1 intronic transcript 1 (non-protein coding) (CRHR1-IT1), transcript variant 2, long non-coding RNA [NR_026906]	CACTGTGCTAAACGCCTTCCATGTATTCATCTCATTAGTAAACATTTCTGAAACTATTCT
A_24_P942250	0.004154074	1.9332629E-5	down	1.3455791	CHD9	Homo sapiens chromodomain helicase DNA binding protein 9 (CHD9), mRNA [NM_025134]	GTACTTTGAATTGATAGTCCTTTATGCAATGTCTTAGCAATAGTCTCTATAATGCCCATC
A_23_P417974	0.009922472	1.069127E-4	up	2.130673	AQP11	Homo sapiens aquaporin 11 (AQP11), mRNA [NM_173039]	TAACATACAGGACAGTCCAGCTGGATGTGATAAAGATTTTATCACCTCATATGGAAAACA
A_23_P302681	0.010165504	1.1235166E-4	up	1.7829607	FIGNL1	Homo sapiens fidgetin-like 1 (FIGNL1), transcript variant 1, mRNA [NM_001042762]	CTGGAACAAAACTTTTGGTTGTGGAAAGTAAGTGGGATACTTGGAATCAAGGCATCTCTG
A_23_P128817	0.012087999	1.579722E-4	up	1.5185137	PCK2	Homo sapiens phosphoenolpyruvate carboxykinase 2 (mitochondrial) (PCK2), transcript variant 1, mRNA [NM_004563]	CTGGGCAAACCCTGGAAACCTGGTGACAAGGAGCCCTGTGCACATCCCAACTCTCGATTT
A_24_P44462	0.019483108	3.7047442E-4	down	1.4601278	TPM1	Homo sapiens tropomyosin 1 (alpha) (TPM1), transcript variant 5, mRNA [NM_000366]	CCTTGAAAGCATTAATGGCTGCAGAGGATAAGTACTCGCAGAAGGAAGACAGATATGAGG
A_33_P3316026	0.007948305	6.9123824E-5	down	1.3930354	USF2	Homo sapiens upstream transcription factor 2, c-fos interacting (USF2), transcript variant 1, mRNA [NM_003367]	TTCTACGTCATGATGACGCCCCAGGATGTGCTTCAGACAGGAACACAGAGGACGATCGCC
A_33_P3235321	0.0040967725	1.8850546E-5	down	1.6983467	SYTL1	Homo sapiens synaptotagmin-like 1 (SYTL1), transcript variant 2, mRNA [NM_032872]	CAAGCGCAAGACGGCGGTGAAGAAACGGAATCTGAATCCGGTTTTCAACGAGACTCTCCG
A_23_P104617	0.011279095	1.3558433E-4	up	1.3450749	GYLTL1B	Homo sapiens glycosyltransferase-like 1B (GYLTL1B), mRNA [NM_152312]	ATTGGGCAGACACCAGGGCAACCTGCCCTCCGCCATCCCTGCTATTTAAATTATTTAAGG
A_32_P174572	0.0056007756	3.4490615E-5	down	1.7767152	HTR7P1	Homo sapiens 5-hydroxytryptamine (serotonin) receptor 7 pseudogene 1 (HTR7P1), non-coding RNA [NR_002774]	GCAAGCTGTCCTCTCAGGATAAAGTGGAATTTCGACATGGATTATGGACTTCTTCCAACT
A_19_P00318539	0.003969394	1.7073666E-5	down	1.606951	XLOC_009378	BROAD Institute lincRNA (XLOC_009378), lincRNA [TCONS_00019580]	GCAAAGGTTTTCAGTCCTAGTCCATCATGACCACATAGCTGGAATACACTTATTTCACTT
A_33_P3335966	0.008195188	7.300449E-5	down	1.5256357	TPM1	Homo sapiens tropomyosin 1 (alpha) (TPM1), transcript variant 1, mRNA [NM_001018005]	CTCGCAGAAGGAAGACAGATATGAGGAAGAGATCAAGGTCCTTTCCGACAAGCTGAAGGA
A_24_P100551	0.006752413	4.8107024E-5	down	1.8750345	SH3RF1	Homo sapiens SH3 domain containing ring finger 1 (SH3RF1), mRNA [NM_020870]	TGGTTTTTTGCAGACAGTAGAGGGAGATTTTGTAACAAGGGCTTGTTACACAGTGATATG
A_33_P3265359	0.0020665633	3.9830343E-6	up	2.6147642	HES6	Homo sapiens hes family bHLH transcription factor 6 (HES6), transcript variant 1, mRNA [NM_018645]	GTACATCTTGTTTGTAGCACACTTGAGTTTGTGTATTCCATTGACATCAAATGTGACAAT
A_23_P90172	0.002681902	7.690363E-6	down	1.7209136	PPP1R15A	Homo sapiens protein phosphatase 1, regulatory subunit 15A (PPP1R15A), mRNA [NM_014330]	ACCCTGAGACTCCCCTAAAGGCCAGAAAGGTGCGCTTCTCCGAGAAGGTCACTGTCCATT
A_23_P468	0.016959388	2.9298742E-4	down	1.4844552	CCDC181	Homo sapiens coiled-coil domain containing 181 (CCDC181), mRNA [NM_021179]	ACATATCTCACCAGTGACTTCAACATACTGTCTTTCCCCTCGACAGAAAGAACTACAAAA
A_32_P138032	0.0017596626	2.9779223E-6	up	2.38339	C1orf61	Homo sapiens chromosome 1 open reading frame 61 (C1orf61), mRNA [NM_006365]	ATGGCTAAGTTGGGAGACCAAAAAGAAGAATGTACTTCATCTGGTTGGGCTGGATTCCCT
A_19_P00803342	0.018123487	3.284336E-4	up	1.657167	ZNF678	Homo sapiens zinc finger protein 678 (ZNF678), transcript variant 1, mRNA [NM_178549]	TACCTGAAGTTCTGTTTGCTGTCATGTGGAAGAAAAGAGCCTTGGAGAAGTTTTATTTTT
A_23_P24384	0.008071415	7.152247E-5	up	1.9535928	CCDC88B	Homo sapiens coiled-coil domain containing 88B (CCDC88B), mRNA [NM_032251]	TGGCCTGGGCTGATCTTGAGCCTTAACTGGACATGAGGGGCATGAGAATAAAGCTGAACT
A_24_P330518	0.0134934345	1.9473425E-4	up	2.82685	CA12	Homo sapiens carbonic anhydrase XII (CA12), transcript variant 1, mRNA [NM_001218]	CTGTCAAAAGACTCTGTATATCTTTTGTGGATGAGTTTTGTGAGAGAACAGAGAGACCAT
A_24_P175187	0.01223971	1.6224165E-4	down	2.5531232	SAMD9	Homo sapiens sterile alpha motif domain containing 9 (SAMD9), transcript variant 1, mRNA [NM_017654]	CAACCAGCGATACGTAATCAAAATGTAATTTTCCCCTAATAAAATTATGGATATGGGCAG
A_24_P410797	0.018900314	3.522846E-4	up	1.6139067	KALRN	Homo sapiens cDNA FLJ43991 fis, clone TESTI4019843, highly similar to Rattus norvegicus huntingtin-associated protein interacting protein (duo) (Hapip). [AK125979]	GTTGCAAGACCCTTCCGAACACATTCCTGTATAAAGTATTTTGCACTATTTAAAGAAACC
A_33_P3257279	0.01336226	1.900145E-4	down	1.4574702	TMEM145	Homo sapiens transmembrane protein 145 (TMEM145), mRNA [NM_173633]	GGGCCTTCCCTCGGGTCCCTGGCAGAAAGACATTTTACCCCTTCTTGCCAAAATAAAAAA
A_23_P139600	0.015102193	2.4266727E-4	up	1.8668659	RASAL1	Homo sapiens RAS protein activator like 1 (GAP1 like) (RASAL1), transcript variant 2, mRNA [NM_004658]	ATTCTGTGGTTTGGAGGCTCCCAGAGACGTGCCTAGTCCTGTGTGCCTTGAGTCCAGAAC
A_23_P119562	0.004412683	2.2403092E-5	up	1.8923093	CFD	Homo sapiens complement factor D (adipsin) (CFD), mRNA [NM_001928]	GGCCTGAAGGTCAGGGTCACCCAAGCAACAAAGTCCCGAGCAATGAAGTCATCCACTCCT
A_32_P305888	0.015623293	2.555838E-4	down	2.5818267	SH3TC2	Homo sapiens SH3 domain and tetratricopeptide repeats 2 (SH3TC2), mRNA [NM_024577]	TAGCCAAACATGATCTAGTTACCCTCTTTATTCTAATTGTTCCCTCAAATCTTATATGGG
A_23_P132226	0.0048710634	2.7065431E-5	up	1.3928174	TPST2	Homo sapiens tyrosylprotein sulfotransferase 2 (TPST2), transcript variant 1, mRNA [NM_001008566]	GACACTCCAGGGTAGAGAATGAAGGGTATGGAAGTAGTCCGGCTTTTGAAACTTAGGTAT
A_33_P3293114	0.009366607	9.7113836E-5	down	1.1484389	SRSF11	Homo sapiens serine/arginine-rich splicing factor 11 (SRSF11), transcript variant 2, mRNA [NM_001190987]	AGAAGCAGGAGTGGCACAAGATCTCCTAAAAAGCCTCGGTCTCCTAAAAGAAAATTGTCC
A_23_P55616	0.006784816	5.023427E-5	down	7.4535465	SLC14A1	Homo sapiens solute carrier family 14 (urea transporter), member 1 (SLC14A1), transcript variant 4, mRNA [NM_001146037]	TTCTTGGTGTTTAGCTGGCTCGATGATGTTAACAGTATTAAAAATTAAACCCCATAAACC
A_19_P00321671	0.0026611327	6.2173385E-6	down	1.7376112			CAAATTCACATCTTCCCCATGCTTCCAGAGAATGCATATTCTTCCTTTGAAAAAAGAAAA
A_33_P3408320	0.009870339	1.0509493E-4	up	2.3082626	CERS1	Homo sapiens ceramide synthase 1 (CERS1), transcript variant 2, mRNA [NM_198207]	CCATCAGATTCGCCTTGGGTGTAGATGAAACAGAAATAAAAGAATCAAAGACGACTCAAG
A_23_P344281	0.0022212095	4.3855116E-6	down	2.5819001	ZIK1	Homo sapiens zinc finger protein interacting with K protein 1 (ZIK1), mRNA [NM_001010879]	GCACTGGTCACTCCTATGTGCTAAGACAAGGCAGACATCTGTGTGTTCTCTTAAGTCTTT
A_33_P3250173	0.009897487	1.0591483E-4	down	3.6817863	IQCJ	Homo sapiens IQ motif containing J (IQCJ), transcript variant 1, mRNA [NM_001042705]	CTATTGCTGTTACTGCCTAGACAATTTTCTATCTTCTCATATCTGATCAACTGACTGTCT
A_33_P3379726	0.011961016	1.5350134E-4	down	1.4307313	CCDC106	Homo sapiens coiled-coil domain containing 106 (CCDC106), mRNA [NM_013301]	TGCCCACCTGATTCCCGGACAGACCTCCCCAACTCCGCGTGAGACAGAGAATTATTCAGA
A_33_P3235940	0.0010583713	1.0326659E-6	down	2.5668309	KLK6	Homo sapiens kallikrein-related peptidase 6 (KLK6), transcript variant B, mRNA [NM_001012964]	GACATACATGGAATAGCACCTGGGCCACCATGCACTCAATAAAGAATGAATTTTATTATG
A_23_P76749	0.012773252	1.7564539E-4	up	1.4865237	GALNT16	Homo sapiens UDP-N-acetyl-alpha-D-galactosamine:polypeptide N-acetylgalactosaminyltransferase 16 (GALNT16), transcript variant 2, mRNA [NM_020692]	CCTGTTCTGTTTTTGCTTTTCCTCTTCTTGACCAAAGCATGTGCCACTAGCTGTCCTTGA
A_19_P00800337	0.01980088	3.8629054E-4	down	1.2587394			TGGCACTGGCCAACGTCTCTTCTAGGTCATCGGTGGTTTTCTCCAACTTTGCCACAGACC
A_23_P253221	0.011279095	1.3574121E-4	up	2.0405767	ARHGEF4	Homo sapiens Rho guanine nucleotide exchange factor (GEF) 4 (ARHGEF4), transcript variant 2, mRNA [NM_032995]	TTGCACTATTCCTTCTCCAAGCCAGAAACCACATTTAATTTCATAAATAAATTTATGAAA
A_23_P501849	0.0072174845	5.666094E-5	up	1.2867663	RPL13	Homo sapiens ribosomal protein L13 (RPL13), transcript variant 2, mRNA [NM_033251]	GAAAGACAGTCCAAGCCCTGGATAATGCTTTACTTTCTGTGTTGAAGCACTGTTGGTTGT
A_24_P182620	0.0022325912	4.6178875E-6	up	5.720351	CELSR2	Homo sapiens cadherin, EGF LAG seven-pass G-type receptor 2 (CELSR2), mRNA [NM_001408]	TGCTTTTCATCTGAGTCACCATTTACTCCAAGCATGTATTCCAGACTTGTCACTGACTTT
A_24_P211151	0.011387031	1.3941414E-4	down	1.287178	EXOSC5	Homo sapiens exosome component 5 (EXOSC5), mRNA [NM_020158]	AGGTCAGCAAAGAGATTTTCAACAAGGCCACACTCGAAGTGATCCTGAGGCCGAAGATTG
A_33_P3349774	0.0033321807	1.21994535E-5	down	1.5023782	LSM14B	Homo sapiens LSM14B, SCD6 homolog B (S. cerevisiae) (LSM14B), mRNA [NM_144703]	ATCATTTTCCGAGGAAGTGACATCAAGGATATCACTGTGTGTGAACCTCCGAAAGCTCAG
A_23_P57709	0.0012204754	1.692515E-6	up	1.6688706	PCOLCE2	Homo sapiens procollagen C-endopeptidase enhancer 2 (PCOLCE2), mRNA [NM_013363]	TATCTGATTGGAAACCTGCCGACTTAGTGCGGTGATAGGAAGCTAAAAGTGTCAAGCGTT
A_23_P364324	0.005152257	2.9309362E-5	down	2.2882338	ABCA13	Homo sapiens ATP-binding cassette, sub-family A (ABC1), member 13 (ABCA13), mRNA [NM_152701]	ACAATCACTGATAGCTTTGTTGTGAGCAATTTTGATTCCCATGTATCACATGAATTACAC
A_24_P235429	0.0060416316	3.9339102E-5	down	2.321298	ABCA1	Homo sapiens ATP-binding cassette, sub-family A (ABC1), member 1 (ABCA1), mRNA [NM_005502]	CCAAAGAGCCATGTGTCATGTAATACTGAACCACTTTGATATTGAGACATTAATTTGTAC
A_24_P286114	0.010046951	1.0862845E-4	up	1.770858	SLC1A3	Homo sapiens solute carrier family 1 (glial high affinity glutamate transporter), member 3 (SLC1A3), transcript variant 1, mRNA [NM_004172]	GTGGCTGTCCTCTTAAGACACTAGTAGAGCAAAGACTTAATCATATCAACTTAATTCTGT
A_33_P3377529	0.015836209	2.6427803E-4	up	1.6890258	HOXA4	Homo sapiens homeobox A4 (HOXA4), mRNA [NM_002141]	TTCTTACTTGCATTTATTTAAGACACTGTTACAGAGATACTGTTGTCCCCTTCTGGGGCA
A_24_P349547	0.017865026	3.2207018E-4	down	1.402835			GACCAGTGGAATGTTAACTATGTGGAAACATCTGCTAAAACAGCTAATGTTGACAAGGTA
A_24_P327499	0.010165504	1.120036E-4	down	1.235814	TTI1	Homo sapiens TELO2 interacting protein 1 (TTI1), mRNA [NM_014657]	CTGAAGGTCTTGGATGTGCTGGATCTGTGTGTGGTTGTTCTTCAGTCCCACAAAAACCAG
A_32_P155460	0.0036912663	1.5009732E-5	up	1.6440247	LINC00162	Homo sapiens long intergenic non-protein coding RNA 162 (LINC00162), long non-coding RNA [NR_024089]	TTCCTCAGACATCTGCAGTCACTTCACAGTGAATGAGGCTCCAGCCGGGTGCCCTGAGAA
A_32_P23795	0.011821067	1.4940287E-4	down	1.1020006	XLOC_014512	BROAD Institute lincRNA (XLOC_014512), lincRNA [TCONS_l2_00020852]	GATGAAGAATTTGCCTTACTTTGTTGTTCGCTCAGTTCCTAAGACTGTGAGTTGTCAAAT
A_33_P3360675	0.006866167	5.1968404E-5	down	1.8521186	PRKAR1B	Homo sapiens protein kinase, cAMP-dependent, regulatory, type I, beta (PRKAR1B), transcript variant 1, mRNA [NM_001164761]	AGATGGAGAGAAAATTGTGGTCCAGGGAGAGCCTGGGGACGACTTTTACATCATCACGGA
A_23_P127891	0.0048710634	2.6637466E-5	down	2.9229548	BDNF	Homo sapiens brain-derived neurotrophic factor (BDNF), transcript variant 1, mRNA [NM_170735]	AGGTTCAAGAGGCTTGACATCATTGGCTGACACTTTCGAACACGTGATAGAAGAGCTGTT
A_19_P00802257	0.013491786	1.9439335E-4	up	1.4980302	LOC728431	Homo sapiens uncharacterized LOC728431 (LOC728431), long non-coding RNA [NR_038842]	CAGGGAGAAGGATGCCCTAAGCCAAAGGAAGTCCTTCCTGGGGTCTAATCTCTACCTTTT
A_23_P352870	0.006752413	4.950693E-5	down	1.564173	PVRL2	Homo sapiens poliovirus receptor-related 2 (herpesvirus entry mediator B) (PVRL2), transcript variant alpha, mRNA [NM_002856]	CTCCCAGCTGGTCATCCACGCAGTGGACAGTCTGTTCAATACCACCTTCGTCTGCACAGT
A_23_P162165	0.015805542	2.6302325E-4	up	2.0385146	KCTD14	Homo sapiens potassium channel tetramerization domain containing 14 (KCTD14), transcript variant 1, mRNA [NM_023930]	ACATCAGGCAATTTCCAGGGTTGGTCTAGAGTCTTGCCACTAAATATTGATCACTCGTTT
A_24_P134195	0.004633631	2.4396131E-5	down	1.410318	MYADM	Homo sapiens myeloid-associated differentiation marker (MYADM), transcript variant 1, mRNA [NM_001020818]	AATTCCTTGCACTCTAACCAGTTCTTGGATGCATCTTCTTCCTTCCCTTTCCTCTTGCTG
A_23_P417113	0.018413978	3.371604E-4	down	1.6820716	RBM33	RNA binding motif protein 33 [Source:HGNC Symbol;Acc:27223] [ENST00000287912]	TCAACTTCCTCCATAGTATTGCTGTAATTAATCAAAGTAGGCAAAGAAGGTTGACTAGGT
A_23_P163402	8.632388E-4	5.3652735E-7	up	2.0240898	CYP1A1	Homo sapiens cytochrome P450, family 1, subfamily A, polypeptide 1 (CYP1A1), mRNA [NM_000499]	GGTAAAACAGGGCCACATAGATGCTGATGGAGCCTTCCCAAGTTGTGCTTGAGCCAGGAG
A_23_P91829	0.009897487	1.0631453E-4	down	1.4880794	DCBLD2	Homo sapiens discoidin, CUB and LCCL domain containing 2 (DCBLD2), mRNA [NM_080927]	TCCATCTTAAGATCTGTAGCTGGGATTTTCTGACTTGTAATGAGCAGGGGGATTGCTTTT
A_33_P3304107	0.008240359	7.3869705E-5	up	1.3881025	KLHL28	Homo sapiens kelch-like family member 28 (KLHL28), mRNA [NM_017658]	GGCTCAAAAGTTTTGTTGGGTACTTTTAATTGAGAAGTAGTTTTGGTTGCTCTTGATTAC
A_33_P3763412	0.003603008	1.4396789E-5	down	1.9473288		Homo sapiens cDNA FLJ40109 fis, clone TESTI2007685. [AK097428]	ATTCATATTTAGTACCTGTTGGCTTTGCTTCTTAAGATAAATTCCAAATGGGGTTGCTGA
A_24_P382001	0.019772172	3.834068E-4	down	1.2389642	POLR3K	Homo sapiens polymerase (RNA) III (DNA directed) polypeptide K, 12.3 kDa (POLR3K), mRNA [NM_016310]	GATGACCACCTTCTACAAGTGCTGCAATGCTCAGTGTGGACACCGCTGGAGGGATTAGGG
A_33_P3420235	0.008572435	8.059641E-5	down	2.4077225	ARPC5	actin related protein 2/3 complex, subunit 5, 16kDa [Source:HGNC Symbol;Acc:708] [ENST00000367534]	CACAAGCAACATGGGACACAGCATTCACTTTAACATTTCTATTTTCCTTTATCATTTCTG
A_32_P131640	0.011916374	1.5229934E-4	up	1.6658788	SLITRK4	Homo sapiens SLIT and NTRK-like family, member 4 (SLITRK4), transcript variant 2, mRNA [NM_173078]	TACTGTGGAGTCCTGTGGGGATACTGCAAACTCTATTGCCAAAGGGATGCTTTATACACA
A_24_P795371	0.0048710634	2.7063357E-5	down	3.3684213	NR2F2-AS1	Homo sapiens NR2F2 antisense RNA 1 (NR2F2-AS1), transcript variant 1, long non-coding RNA [NR_102743]	TTAGACAACACAAACCTAGGAAGGGTTTGAGAGGTGAAACAAACTGGGGTTATGGATGAA
A_23_P121215	0.01980088	3.8458145E-4	down	1.8923595	CAMK1	Homo sapiens calcium/calmodulin-dependent protein kinase I (CAMK1), mRNA [NM_003656]	TGAACAGATTTTGAAGGCCGAGTACGAGTTTGACTCTCCTTACTGGGACGACATCTCTGA
A_19_P00321075	6.965165E-4	2.2108733E-7	up	1.442455	PVT1	Homo sapiens Pvt1 oncogene (non-protein coding) (PVT1), long non-coding RNA [NR_003367]	TTCACTGAGGCTACTGCATCTTGAGACTCAGGATGAAGACCCAGCTTGGGGCTGTCAAAG
A_23_P27677	0.005319172	3.1256153E-5	down	1.4174303	IRF3	Homo sapiens interferon regulatory factor 3 (IRF3), transcript variant 1, mRNA [NM_001571]	AGGTCCCCAAGGACAAGGAAGGAGGCGTGTTTGACCTGGGGCCCTTCATTGTAGATCTGA
A_33_P3342628	0.0011272369	1.2982632E-6	down	2.398917	HES4	Homo sapiens hes family bHLH transcription factor 4 (HES4), transcript variant 2, mRNA [NM_021170]	CCCGTTCTAGGGCCGTGGCCTTTGCCGAGACTGTAGCAGAGAAAACGTATTTATTATTCC
A_23_P68211	0.0029621231	1.0304248E-5	up	1.6719947	SPR	Homo sapiens sepiapterin reductase (7,8-dihydrobiopterin:NADP+ oxidoreductase) (SPR), mRNA [NM_003124]	GAACACAGAAGAGAGGAGGTTGTGTCTCTTGCTCATAGCAAGCCTGTGGGTAGAGGAAAG
A_23_P141847	0.0028666416	9.418235E-6	down	1.41268	UBE2M	Homo sapiens ubiquitin-conjugating enzyme E2M (UBE2M), mRNA [NM_003969]	GAGGACTGGAAGCCAGTCCTTACGATAAACTCCATAATTTATGGCCTGCAGTATCTCTTC
A_23_P163235	0.0054552257	3.256851E-5	up	1.865896	CKMT1A	Homo sapiens creatine kinase, mitochondrial 1A (CKMT1A), mRNA [NM_001015001]	TGGCTCGAGACTGGCCAGATGCTCGTGGAATTTGGCACAACAATGAGAAGAGCTTCCTGA
A_23_P30464	0.011347917	1.3843151E-4	up	1.4636444	PRR7	Homo sapiens proline rich 7 (synaptic) (PRR7), transcript variant 1, mRNA [NM_030567]	CCCCACCGGCGGACTCCTGGCCTGACTGCGGGGCTTTTTAAATGCTTCCCTGGACTGCGG
A_24_P916656	0.007876265	6.743551E-5	down	1.4091347	CRCP	Homo sapiens CGRP receptor component (CRCP), transcript variant 1, mRNA [NM_014478]	GACATTCGATTTTCCAAATTGGCGCTCTTATTTTCAATGCTAATTGGATTACTTCTCTTC
A_23_P144916	0.003603008	1.42201125E-5	down	1.5645969	GFPT2	Homo sapiens glutamine-fructose-6-phosphate transaminase 2 (GFPT2), mRNA [NM_005110]	CATAGTAAAACAGCTTGAAATATCCCATGCAAGAGAGTAGTTTCAAGTGGGCAACTCTGC
A_23_P141429	0.013989	2.1207909E-4	down	1.450523	ABI3	Homo sapiens ABI family, member 3 (ABI3), transcript variant 1, mRNA [NM_016428]	AGCTGTGTTCTGTCCTTCCTCCCATCGGAGGGAGAAGGGGTCCTGGGGAGAGAGAATTTA
A_23_P26994	0.015665023	2.5663464E-4	down	1.643572	GNGT2	Homo sapiens guanine nucleotide binding protein (G protein), gamma transducing activity polypeptide 2 (GNGT2), transcript variant 1, mRNA [NM_031498]	CCTTCTCTTCATCACAGAATGAGTAAAGATCCCTGAACAAATGCATTGTGAACCCATTCC
A_33_P3251073	0.019617407	3.7625583E-4	up	1.6661911	TMEM52	Homo sapiens transmembrane protein 52 (TMEM52), mRNA [NM_178545]	CAGGGCCACCTGTGACGTCTGCATCTTCTTGGAGAGAGAATAAAGTTTGTATTTAAGTGG
A_23_P41437	0.017460369	3.1153983E-4	up	1.1806433	UFSP2	Homo sapiens UFM1-specific peptidase 2 (UFSP2), transcript variant 1, mRNA [NM_018359]	AGTTGCATGGAATGAGATTACAGGGCAGATAAAGTTTCTGATTCTAGATCCACATTATAC
A_23_P132248	0.008360204	7.565351E-5	up	1.280462	ZMAT5	Homo sapiens zinc finger, matrin-type 5 (ZMAT5), transcript variant 1, mRNA [NM_019103]	GCCCTGCAGGAAGTTTCTACTGACAGGCCAGTGCGACTTTGGCTCCAACTGCAGATTTTC
A_24_P208825	0.010313914	1.1567025E-4	up	1.4956092	MUC4	Homo sapiens mucin 4, cell surface associated (MUC4), transcript variant 1, mRNA [NM_018406]	TGGGGCGAGCACTGTGAGCACCTGAGCATGAAACTCGACGCGTTCTTCGGCATCTTCTTT
A_23_P132718	0.019552186	3.7306992E-4	down	1.6715493	SEMA3B	Homo sapiens sema domain, immunoglobulin domain (Ig), short basic domain, secreted, (semaphorin) 3B (SEMA3B), transcript variant 1, mRNA [NM_004636]	TTGGGTAGTGAGCAGTGAGCAGAAAGCTGTGAACAGGCTGGGCTGCTGGAGGTGGGGCGA
A_19_P00322968	0.011765848	1.468484E-4	up	1.1952715	LINC00963	Homo sapiens long intergenic non-protein coding RNA 963 (LINC00963), long non-coding RNA [NR_038955]	ATGCAGGCCATCGATGGAAATGTCAGACAGTGCGAGTCCACGCCTGAACACTTCTGGGGT
A_23_P67339	0.004821561	2.563509E-5	down	2.078959	RCN3	Homo sapiens reticulocalbin 3, EF-hand calcium binding domain (RCN3), mRNA [NM_020650]	CGACACGGACAAGGATGGGCGGCTGAGCAAAGCGGAAATCCTGGGTAATTGGAACATGTT
A_33_P3296181	0.006752413	4.851515E-5	down	3.0555081	CCL3L3	Homo sapiens chemokine (C-C motif) ligand 3-like 3 (CCL3L3), mRNA [NM_001001437]	AAGAGTAGTCAGTCCCTTCTTGGCTCTGCTGACACTCGAGCCCACATTCCATCACCTGCT
A_33_P3303697	0.019106185	3.5780275E-4	up	1.7268621	CR2	Homo sapiens complement component (3d/Epstein Barr virus) receptor 2 (CR2), transcript variant 1, mRNA [NM_001006658]	GCTTTTCATTTAGAAGCACGAGAAGTATATTCTGTTGATCCATACAACCCAGCCAGCTGA
A_23_P329353	0.008057083	7.094907E-5	up	1.8049659	CNRIP1	Homo sapiens cannabinoid receptor interacting protein 1 (CNRIP1), transcript variant CRIP1a, mRNA [NM_015463]	ATAACGTATTAAAACTCTTTTAAGTAGCTTAAGGTATTGTGCAATGGCCTAGCCTAGTAG
A_19_P00319028	0.012322474	1.6393278E-4	down	2.5255184	RFX8	Homo sapiens RFX family member 8, lacking RFX DNA binding domain (RFX8), mRNA [NM_001145664]	TGTCTCATGTATGAGATTTACGTGGAGACCTGTGGGCAAAACACTGAGAACCAAGTCAAC
A_33_P3412722	0.006752413	4.8704773E-5	up	1.1923348	SNX8	Homo sapiens sorting nexin 8 (SNX8), mRNA [NM_013321]	TGTTGCACAAGCACCAGCGGGCCCTGCACAAGTACAGCCTGATGAAGAGGCAGATGATGA
A_33_P3265180	0.01970279	3.7881965E-4	down	1.1427159	CSNK1E	Homo sapiens casein kinase 1, epsilon (CSNK1E), transcript variant 1, mRNA [NM_152221]	TTTTCCGAGCCTCAGAATCCAGGAGATACGCACAGCCCCACCCACTCTGAGATGACAGTG
A_33_P3379406	0.017784495	3.199456E-4	up	1.7024498	GREB1	Homo sapiens GREB1 protein, mRNA (cDNA clone IMAGE:6729261), partial cds. [BC071853]	ACCGCTGTCTCTTGTTAGTCAGGGGACCTTGGCCAAGTCTCAATAAATGTTTCTTCATCT
A_24_P250499	0.00564675	3.5039127E-5	down	1.3827314	RPRD1B	Homo sapiens regulation of nuclear pre-mRNA domain containing 1B (RPRD1B), mRNA [NM_021215]	TAAATGAATGTGTTGGCCTCTTAATACCTGTTACTAGTGGACTTCCTGTGAGGAAGTTAG
A_23_P99741	0.002681902	7.3301235E-6	up	1.6981655	CDKL1	Homo sapiens cyclin-dependent kinase-like 1 (CDC2-related kinase) (CDKL1), transcript variant 1, mRNA [NM_004196]	CCCAGCTAACTGGCAGCAGCATCCTTCCAGCTTTGGATAATAAGAAGTACTACTGTGATA
A_33_P3376971	0.017034225	2.982841E-4	up	1.8324687	CHAC1	Homo sapiens ChaC, cation transport regulator homolog 1 (E. coli) (CHAC1), transcript variant 1, mRNA [NM_024111]	TTCCTGGGAAGCTCATCACTACAGGCCCTGGCAACCTTCCCAGTCTGTCCCATACTGTTA
A_33_P3281741	0.016810922	2.8916792E-4	down	1.5690606	RFX8	Homo sapiens RFX family member 8, lacking RFX DNA binding domain (RFX8), mRNA [NM_001145664]	TGGAATCTTCTTCTCACTGCTGTAAGCAAAGCCATGACCCTCTGCCACAGAGATAGTTTT
A_33_P3266255	0.013842091	2.0641586E-4	down	1.4629685	CSGALNACT2	Homo sapiens chondroitin sulfate N-acetylgalactosaminyltransferase 2 (CSGALNACT2), mRNA [NM_018590]	TGGTGTATTTTGGTAAAGAAGGACTGTCTAAAGTCAAGTCTATCCTAGAATCTGTCACCA
A_33_P3302025	0.009897487	1.0622839E-4	down	2.1090243	ADAMTSL1	Homo sapiens ADAMTS-like 1 (ADAMTSL1), transcript variant 2, mRNA [NM_052866]	ATCACCAGCTGGGAAGCACCGTCAAGGAAGATAACTGTGGGGTCTGCAACGGAGATGGGT
A_33_P3316273	0.012079292	1.5729057E-4	down	2.5327308	CCL3	Homo sapiens chemokine (C-C motif) ligand 3 (CCL3), mRNA [NM_002983]	TGCTTTTGTTCAGGGCTGTGATCGGCCTGGGGAAATAATAAAGATGCTCTTTTAAAAGGT
A_33_P3334443	0.0075082397	6.1480365E-5	up	1.4786624	FAM69A	Homo sapiens family with sequence similarity 69, member A (FAM69A), transcript variant 4, mRNA [NM_001252271]	CCTTCAACGCCATGGATTAGCACCAGTTTTGTTTACTTTAAGGTACTTTTCCCATTCATC
A_23_P341532	0.018333768	3.3526082E-4	up	1.1970693	SETDB2	Homo sapiens SET domain, bifurcated 2 (SETDB2), transcript variant 1, mRNA [NM_031915]	GAAGCTGGGACTGTGCCTGAGAAGGAAATCTTCTGCCAATGTGGGGTTAATAAATGTAGA
A_33_P3431595	0.0028894437	9.899311E-6	down	2.1731367	C8orf31	Homo sapiens chromosome 8 open reading frame 31 (C8orf31), mRNA [NM_173687]	GTCTGTGTGCTAGGGAAGCGATGAACCATACTGTTAGTCTATTAAACGTAACTCAACCTG
A_23_P211850	0.0028108144	8.29019E-6	up	2.0457168	ABHD6	Homo sapiens abhydrolase domain containing 6 (ABHD6), mRNA [NM_020676]	TGGGCCTCTTTTCTATTTCAATGTGCTACTAAGAACCCTTGGATGTAACATACTAGTTAG
A_24_P217572	0.0085312715	7.999303E-5	up	2.2604477	EDNRA	Homo sapiens endothelin receptor type A (EDNRA), transcript variant 1, mRNA [NM_001957]	GGTTGGTTTGATAAAGCAGTATTTGGGGTCATATTGTTTCCTGTGCTGGAGCAAAAGTCA
A_33_P3345389	0.003184709	1.1527681E-5	down	1.7336324	C20orf194	Homo sapiens chromosome 20 open reading frame 194 (C20orf194), mRNA [NM_001009984]	ATTTACCTTGGTAATCGAGATGTCATGCTAAGGACCAATAAACTATCACTGAACAAGCAA
A_23_P68505	0.015967976	2.6758903E-4	down	1.3590729	FAM217B	Homo sapiens family with sequence similarity 217, member B (FAM217B), transcript variant 2, mRNA [NM_001190826]	AGCACTGAGTGTTTTGCTAGTCTAGTGACATGGGTTATTGTATTTCCGAGAAGTGCCTCT
A_33_P3348614	0.013407575	1.9207106E-4	up	1.5135165	TBL1XR1	Homo sapiens transducin (beta)-like 1 X-linked receptor 1 (TBL1XR1), mRNA [NM_024665]	TATTTGAAGTTTGCTGGAATGCAGCAGGAGACAAAGTTGGAGCCAGTGCATCAGATGGTT
A_24_P391260	0.007755968	6.562812E-5	up	1.2665228	PTTG1IP	Homo sapiens pituitary tumor-transforming 1 interacting protein (PTTG1IP), transcript variant 1, mRNA [NM_004339]	TGGGGAGTTTGTTGGGTGAACTTTGAGGCGCTGATCATCACCATGTCGGTAGTCGGGGGA
A_33_P3350726	0.01358262	1.9953314E-4	up	1.9552692	PPARG	Homo sapiens peroxisome proliferator-activated receptor gamma (PPARG), transcript variant 3, mRNA [NM_138711]	ACAATCAGATTGAAGCTTATCTATGACAGATGTGATCTTAACTGTCGGATCCACAAAAAA
A_23_P154345	0.01013261	1.0999209E-4	up	1.3629557	HIBCH	Homo sapiens 3-hydroxyisobutyryl-CoA hydrolase (HIBCH), transcript variant 1, mRNA [NM_014362]	AATCTACAGCATGTGGGCCAAATCCAGCCTGCTGCCTGTTTTTATATACCCTGTAAGCTA
A_24_P237661	0.013842091	2.067195E-4	up	1.844425	NCOR1	Homo sapiens nuclear receptor corepressor 1 (NCOR1), transcript variant 2, mRNA [NM_001190438]	CCTTCAAAACTTTCAAAGGAAGAGTTAATAGAGTGTATGGATCGTGTAGATCGAGAAATT
A_24_P734953	0.0038296513	1.6022515E-5	down	1.4401934	TRNP1	Homo sapiens TMF1-regulated nuclear protein 1 (TRNP1), mRNA [NM_001013642]	GGAGAACTGGCTGATGCTCTGAATTTCTTCATATACCCCACATTTGACTTTGGCTTACAC
A_19_P00316655	0.013407575	1.9187723E-4	down	2.4374015			GGAAGGGAGAGAATGTATTGCAGAAATGCAACTTAACTTTTTCCTTTCCAGATGGCATGG
A_23_P65518	0.013842091	2.0622589E-4	up	1.669982	DACT1	Homo sapiens dishevelled-binding antagonist of beta-catenin 1 (DACT1), transcript variant 1, mRNA [NM_016651]	ACCGAAGCGTTGACCTGAACATATTAGTGCAATCCAGTCCAGATTGGACCTTTGATCCTA
A_33_P3422133	0.0048606982	2.6176222E-5	down	1.5492073	ADAP1	Homo sapiens ArfGAP with dual PH domains 1 (ADAP1), transcript variant 1, mRNA [NM_006869]	TATTTATTTTTCACCTATCTCCTTCCTGTCAAGGCAGGCCGGGCTCCAGGGCTCCCCTTG
A_24_P916614	0.013679684	2.0224518E-4	up	1.4931986	PTBP3	Homo sapiens polypyrimidine tract binding protein 3 (PTBP3), transcript variant 1, mRNA [NM_005156]	TACGTGGTCTGTTCATCAAAATTCCCCTTTTCAGTTTTTAAGAATGTTCGTCTAACAGAA
A_23_P89601	0.010484895	1.2001748E-4	up	3.1878288	KRT32	Homo sapiens keratin 32 (KRT32), mRNA [NM_002278]	AACTGTTCTCTTTGGTGATGTTTCTGGTTGTCTGTGCTGCCTCAAAGAGCGTGTGTTCTT
A_24_P377144	8.632388E-4	3.861912E-7	down	1.6487259	ANTXR2	Homo sapiens anthrax toxin receptor 2 (ANTXR2), transcript variant 1, mRNA [NM_058172]	AGAAAGCCAAAAATGCTGTGGTGAAGATTCCTGAAGAAACAGAGGAACCCATCAGGCCTA
A_33_P3265222	0.018681392	3.4556954E-4	down	1.3497305	KIAA1324	Homo sapiens KIAA1324 (KIAA1324), transcript variant 1, mRNA [NM_020775]	CGACCTCATCTTTACCAGCAAGAAGTCACTCTTTGGGAAGATCAAATCATTTACCTCCAA
A_23_P20107	0.008741221	8.4854255E-5	up	1.5766282	GSTK1	Homo sapiens glutathione S-transferase kappa 1 (GSTK1), transcript variant 1, mRNA [NM_015917]	GCAAAGGACTATACATGGCAAATGACTTAAAGCTCCTGAGACACCATCTCCAGATTCCCA
A_24_P328504	0.004821561	2.5725569E-5	down	2.4070058	SP140	Homo sapiens SP140 nuclear body protein (SP140), transcript variant 1, mRNA [NM_007237]	ACGGAAAGTGATCAAGCGTGTGGCACAATGGATACTGTGGATATTGCAAACAACTCCACT
A_33_P3409154	0.018301368	3.340221E-4	up	1.81524	SLC22A23	Homo sapiens solute carrier family 22, member 23 (SLC22A23), transcript variant 1, mRNA [NM_015482]	AAGGAGCGCGGGTCGGAGGAGACAAACTCTTTGGAAATAACCCTTTCAAGACTTTCTTTT
A_23_P217341	0.0025914374	5.908319E-6	down	2.225193	MAGEB1	Homo sapiens melanoma antigen family B, 1 (MAGEB1), transcript variant 1, mRNA [NM_002363]	ACACCTACACCCTCGTCAGTAAGCTAAACCTCACCAATGATGGAAACCTGAGCAATGATT
A_24_P709377	0.007121245	5.5540844E-5	down	2.5174983	PAX8-AS1	Homo sapiens PAX8 antisense RNA 1 (PAX8-AS1), transcript variant 1, long non-coding RNA [NR_015377]	GCAAAGAACGCCACAAAACAGTGAGCTCAACTTCTTGAAAGTCATAATGTGTTGCTAAGT
A_33_P3246244	0.0012204754	1.6725368E-6	down	3.891537			TATTTGGAAGCAAAATATTTGGCTCCTGACTGAAAGGGTTTTGATCCATGCATACATTAA
A_23_P305033	0.010340965	1.1678944E-4	down	1.3271903	TAB3	Homo sapiens TGF-beta activated kinase 1/MAP3K7 binding protein 3 (TAB3), mRNA [NM_152787]	AGGTGGTAAGATGCCTTTGGCTTGTACAGTGTGATTCATCGAGCTCTATCAACACTGGTA
A_23_P36795	0.0073173423	5.8055233E-5	down	1.8102894	SYT1	Homo sapiens synaptotagmin I (SYT1), transcript variant 1, mRNA [NM_005639]	AAAGTAGCTCTCCATTATCACCTTTATACAAAATGTACATCCTGTGAATTCTGTTCCAGA
A_24_P51061	0.005391494	3.180785E-5	down	1.3956085	DCBLD2	Homo sapiens discoidin, CUB and LCCL domain containing 2 (DCBLD2), mRNA [NM_080927]	TCTGGGGTTGCAAATGAACCATTCAATTGAATCAAAAGGCAATGAAATCACATTGCTGTT
A_33_P3293237	0.008240359	7.398795E-5	up	1.7514385		Q86TZ0_HUMAN (Q86TZ0) Full-length cDNA clone CS0DC023YN15 of Neuroblastoma of Homo sapiens (human) (Fragment), partial (30%) [THC2780218]	GAAAACCTAGCCTCATTCTCTGGTGGCCTGTCTTGCAAAAGAGAGATGAAATCAAACCTG
A_23_P41470	0.0069809137	5.365516E-5	down	1.6347106	DDX60	Homo sapiens DEAD (Asp-Glu-Ala-Asp) box polypeptide 60 (DDX60), mRNA [NM_017631]	TGTCGCTTAATGCCTATGCACTGGATTTCTACAAACATGGTTCCTTGATAGGATTAGTCC
A_19_P00317412	0.011942972	1.5298907E-4	up	1.5189898	LOC728431	Homo sapiens uncharacterized LOC728431 (LOC728431), long non-coding RNA [NR_038842]	AAGGATGCCCTAAGCCAAAGGAAGTCCTTCCTGGGGTCTAATCTCTACCTTTTGCATGAT
A_23_P369328	0.006359366	4.319795E-5	up	1.1945713	C10orf35	Homo sapiens chromosome 10 open reading frame 35 (C10orf35), mRNA [NM_145306]	GGAGCAGGACTTGGGCTTAGGGCAGGTGGAAAAAATTCCAGACTTTTTTAGCACTGTTTT
A_23_P350574	0.018593052	3.4218733E-4	down	1.2454281	FCRLB	Homo sapiens Fc receptor-like B (FCRLB), mRNA [NM_001002901]	AATTTAGTCACCCTTAGCCCTTCAGATAAGCCTAGCCAGTACATATTTCAGCACAGGCAG
A_33_P3577142	0.0010050808	8.2997315E-7	up	1.672027		Homo sapiens cDNA FLJ40824 fis, clone TRACH2011113. [AK098143]	GGTAATGTGATCTCACTGTGGCTTTTGTTTTCATTTCCCTAATGTTTAGTTATGTTGATC
A_23_P129209	0.01942551	3.680094E-4	up	1.5941939	IDH2	Homo sapiens isocitrate dehydrogenase 2 (NADP+), mitochondrial (IDH2), mRNA [NM_002168]	GCGTTTCAAGGACATCTTCCAGGAGATCTTTGACAAGCACTATAAGACCGACTTCGACAA
A_24_P166613	0.003603008	1.43184E-5	up	1.3854923	EPDR1	Homo sapiens ependymin related 1 (EPDR1), transcript variant 1, mRNA [NM_017549]	TCTAGATGCTTCTACTGTTATGTTTTATCTGCCCATTTATCTTTCTTAGTTACCAGGAGA
A_24_P532864	9.554596E-4	7.411016E-7	down	9.360188		RST7162 Athersys RAGE Library Homo sapiens cDNA, mRNA sequence [BG188151]	CTGGCACTAAGAAATACAGACACTTGTGATTTACTACTGGGCACTTATAGGAATGGAGTC
A_33_P3381513	0.0026611327	6.927502E-6	down	2.2376947	CD274	Homo sapiens CD274 molecule (CD274), transcript variant 1, mRNA [NM_014143]	CTGGGAGCCATCTTATTATGCCTTGGTGTAGCACTGACATTCATCTTCCGTTTAAGAAAA
A_23_P130194	0.017034225	2.9808906E-4	up	1.1999569	PYCR1	Homo sapiens pyrroline-5-carboxylate reductase 1 (PYCR1), transcript variant 1, mRNA [NM_006907]	CCCTGCCTGTGTGGGAGGGTGGTTACTGTGGGTGGAATAGTGGAGGCCTTCAACTGATTA
A_33_P3333863	0.015967976	2.6760294E-4	up	1.1379212	CCZ1	Homo sapiens CCZ1 vacuolar protein trafficking and biogenesis associated homolog (S. cerevisiae) (CCZ1), mRNA [NM_015622]	AGCCATGGAAGACGGAGGCGTCAAGCTTCTGAAAGAAAGATTAGAGAAATTCTTCCATCG
A_23_P410115	0.012237157	1.6164724E-4	up	2.6208599	ENTHD1	Homo sapiens ENTH domain containing 1 (ENTHD1), mRNA [NM_152512]	TGCTAGTGTTAGGAGTTAAATGGAAACAAGAAGGACATGGGGCAAATGTTTTTACTGTCA
A_23_P13554	0.009022887	8.8860965E-5	up	1.6807387	ALG8	Homo sapiens ALG8, alpha-1,3-glucosyltransferase (ALG8), transcript variant 2, mRNA [NM_001007027]	TCCTGGAAGGTGAAGTACCCCTTCATCCCTTTGTTACTAACCTCAGTGTATTGTGCAGTA
A_23_P206310	0.015795676	2.610355E-4	up	1.587379	KIAA0513	Homo sapiens KIAA0513 (KIAA0513), transcript variant 2, mRNA [NM_014732]	TGTTGCATTTTTGCAATCTTGTGTCCCGCTCGGTGATGTTCTACAAACTCTGTTTTAAGG
A_33_P3281616	0.0033321807	1.2218126E-5	up	1.49007	CDPF1	Homo sapiens cysteine-rich, DPF motif domain containing 1 (CDPF1), mRNA [NM_207327]	TTAGAATTCTGAGAGGCAGGAACTGCTCTGTCTTTGTAACTACTCAAGGCCAACTGTCAC
A_32_P76627	0.0042559365	2.100709E-5	down	1.7420111		HUMKEREP keratin {Homo sapiens} (exp=-1; wgp=0; cg=0), partial (72%) [THC2531223]	CTCTGGCACACCATGCAGAACCTGGAGATTGAGCTGCAGTCCCAGCTCAGCATGTTAGGA
A_33_P3780572	0.018960627	3.5393264E-4	down	1.5197097	LINC01060	PREDICTED: Homo sapiens uncharacterized LOC401164 (LOC401164), transcript variant X4, misc_RNA [XR_244627]	CACTGATGGTGGGCTTCCAGCCTCCAGAATTGTAAGGCAATAAATTCATGTTGTTTTAAG
A_33_P3226060	0.0140753435	2.1371893E-4	up	2.1120663	TMEM178B	Homo sapiens transmembrane protein 178B (TMEM178B), mRNA [NM_001195278]	CAACCTGTCCCGAGGACCAACTACCCTAAATCCAGACCCGAGAATGGGACAGTGTGCTAA
A_23_P372946	0.013893685	2.0998095E-4	up	1.2696153	TM4SF19	Homo sapiens transmembrane 4 L six family member 19 (TM4SF19), transcript variant 1, mRNA [NM_138461]	GGTTACCCATTCAAAGACCTGCATAGTAGGAATTATCTGTATGACCGTTCGCTCTGGAAC
A_23_P130304	0.012597751	1.7025988E-4	down	1.450867	TXNL4A	Homo sapiens thioredoxin-like 4A (TXNL4A), mRNA [NM_006701]	AAATACAGGAAGCTCCAGGGCTGGAGCACCTCTGAGATGGAATTGATAACATGGTCTTAA
A_33_P3303339	0.012218791	1.6111745E-4	up	4.037601			AGCCAATCTGCAAGCCCATTTGAATGAAGGTGTCATGTGGTGAACCACTGTTTTACATGC
A_24_P366526	0.003603008	1.394278E-5	up	1.6867754	SYNGR2	Homo sapiens synaptogyrin 2, mRNA (cDNA clone MGC:102914 IMAGE:4746277), complete cds. [BC105992]	GGAGATGCCCGGCCCTGGGATGCTGTTTGGAGATGGAATAAATGTTTTCTCATTCAAAAA
A_23_P44264	0.009200237	9.3207855E-5	up	2.054591	EMX2	Homo sapiens empty spiracles homeobox 2 (EMX2), transcript variant 1, mRNA [NM_004098]	TCCAAGATCATAGACTTACTAAAGAGAGTGACAAATGCTTCCTTAATGTCTTCTATACCA
A_24_P921477	0.019834422	3.8741107E-4	up	1.5767258	METTL23	Homo sapiens methyltransferase like 23 (METTL23), transcript variant 6, mRNA [NM_001206987]	CTTCCAGGAATTTTGGCTGCCAAATGTGGTGCAGAAGTAATACTGTCAGACAGCTCAGAA
A_24_P289178	0.008515276	7.865798E-5	up	1.7539471	C16orf74	Homo sapiens chromosome 16 open reading frame 74 (C16orf74), mRNA [NM_206967]	CCCCAGGGCTGTGCAAACACATGCCCCTGCCATAAGCACCAACAAGAACTTCTTGCAGGT
A_23_P379071	0.0019559204	3.6318654E-6	down	1.9613605	FBXL13	Homo sapiens F-box and leucine-rich repeat protein 13 (FBXL13), transcript variant 1, mRNA [NM_145032]	ATGCCATTACCTGCACATTTTGGATATCTCTGGTTGTGTCTTGCTTACTGACCAAATCCT
A_33_P3398727	0.016236829	2.7325348E-4	up	1.4695941		Homo sapiens cDNA clone IMAGE:5270501. [BC041856]	ACGAAAGATTTCAGTGTACCATGCGATACTGTTTGATAAGCATTTTACCCATAGTAGAAC
A_24_P387437	0.0010039029	8.0227284E-7	down	4.507947	CTCFL	Homo sapiens CCCTC-binding factor (zinc finger protein)-like (CTCFL), transcript variant 2, mRNA [NM_080618]	AAATCAGATAAGGCAAATGTGTACCTGTAAGGAATTTGTACTTTTTCATAATGCCCAGTG
A_24_P118196	0.0028666416	9.3847875E-6	up	1.5300257	GXYLT2	Homo sapiens glucoside xylosyltransferase 2 (GXYLT2), mRNA [NM_001080393]	TATGAAGCAATACGGGATTTTCCCTTTCAAGACAATCTCTTTCAATCCATGTATTACCCC
A_23_P350451	0.011644231	1.447736E-4	down	2.3694942	PRDM1	Homo sapiens PR domain containing 1, with ZNF domain (PRDM1), transcript variant 1, mRNA [NM_001198]	ATGACATCAGTGTGATCTCTGTAGTGGAGAAGGAAATTCTGGCCGTGGTCAGAAAAGAGA
A_33_P3267330	0.019971889	3.912315E-4	up	2.150261	HAR1B	Homo sapiens highly accelerated region 1B (non-protein coding) (HAR1B), long non-coding RNA [NR_003245]	GGACCCCATAAATAGCAACACCCTGTATGTACTCATGACAATTTTTTAAAAAAGAACACT
A_23_P361584	0.01980088	3.859211E-4	up	2.1375232	TMEM154	Homo sapiens transmembrane protein 154 (TMEM154), mRNA [NM_152680]	GCATTTTCGTACATTTTAAGCAAACTAGGTTAACAACAACATAGCCTAGTCAAACTTCTC
A_24_P371053	0.0048710634	2.6836742E-5	up	1.5619727	ORMDL1	Homo sapiens ORM1-like 1 (S. cerevisiae) (ORMDL1), transcript variant 1, mRNA [NM_016467]	GAATGAAAAGAGTTACAGACCAACTTAAACATCAATTCGTGTCAGTAAACTGACTTTTGG
A_24_P721699	0.0060416316	3.9619583E-5	down	1.2177333	A1BG-AS1	Homo sapiens A1BG antisense RNA 1 (A1BG-AS1), long non-coding RNA [NR_015380]	AGGGTGTGCACAGAACTCAGAAGTCAGACCACTGAACAGTGACAGAACCTTTCAGCCCAT
A_23_P16469	0.005152257	2.9332085E-5	down	1.6471775	PLAUR	Homo sapiens plasminogen activator, urokinase receptor (PLAUR), transcript variant 3, mRNA [NM_001005377]	ACAGGACCCTGAGCTATCGGACTGGCTTGAAGATCACCAGCCTTACCGAGGTTGTGTGTG
A_33_P3359704	0.008909109	8.752483E-5	down	1.6354291	ZNF703	Homo sapiens zinc finger protein 703 (ZNF703), mRNA [NM_025069]	TACTATTCGCCATACGCGCTGTATGGACAGAGACTAGCTTCAGCCTCGGCGCTGGGATAC
A_24_P356509	0.0028656446	8.627904E-6	down	1.7532943	RAD51D	Homo sapiens RAD51 paralog D (RAD51D), transcript variant 6, mRNA [NM_001142571]	TGATGCTGACGTAAATAATACATGGCAAATCTAGTCCTTTATGCAGAAATTCATTGCTGG
A_23_P36689	0.012325222	1.6512813E-4	up	1.1999575	LRRC23	Homo sapiens leucine rich repeat containing 23 (LRRC23), transcript variant 2, mRNA [NM_006992]	TGCAGATTGCTAGTTTTGCTTATAACCAGATTACTGACACTGAAGGCATCTCTCATCCTC
A_23_P83976	0.006386405	4.374081E-5	up	1.4539089	CEP112	Homo sapiens centrosomal protein 112kDa (CEP112), transcript variant 1, mRNA [NM_145036]	TCTAATCAGGTGCGATGTGCAGAGAAAAAATTACAACACAAAGAATTGGAGTCACAGGAA
A_23_P200685	0.00868857	8.230095E-5	up	1.4306022	MARC2	Homo sapiens mitochondrial amidoxime reducing component 2 (MARC2), mRNA [NM_017898]	TAACAACAGCAGCAACGATACATCAGCAAATCCTTATTATCCAGCCTTCAACTATCTTTA
A_19_P00318537	8.632388E-4	3.3146776E-7	down	1.6311796	XLOC_009378	BROAD Institute lincRNA (XLOC_009378), lincRNA [TCONS_00019580]	TATCTGCTTTCCAAAAACATGGAGCTAAGATCCCAGCACTGAGAAGATGGGCATTCCTAG
A_33_P3371115	0.001697711	2.7932722E-6	up	4.473873	AQP7P3	Homo sapiens aquaporin 7 pseudogene 3 (AQP7P3), non-coding RNA [NR_026558]	ATGTGAAGCTTGAGGATTCCTTCATCTCTTTGCCCAATGGCATTGTGATTATTAAACTCT
A_23_P24796	0.01688595	2.9122707E-4	down	1.2978384	FAM160A2	Homo sapiens family with sequence similarity 160, member A2 (FAM160A2), transcript variant 1, mRNA [NM_032127]	GTCACCTCGCCTTTCTTGTTGGAGACTTCAGAGGAAGGATCTGGCCCTCTCATCTCAGGC
A_23_P152858	0.013028001	1.8281153E-4	up	1.1618679	COPRS	Homo sapiens coordinator of PRMT5, differentiation stimulator (COPRS), mRNA [NM_018405]	AGTGTTCCTTATTGACAGTGTTCAATAAGGCCCCGTCATTCTCGCCAGTCTGTTGTTGTT
A_24_P210829	0.010791887	1.2454616E-4	down	1.5090293	NME4	Homo sapiens NME/NM23 nucleoside diphosphate kinase 4 (NME4), transcript variant 1, mRNA [NM_005009]	TGAGGCTGCCCCAGGAACCATAAGGGGTGACTTCAGCGTCCACATCAGCAGGAATGTCAT
A_19_P00322371	0.005152257	2.9685545E-5	up	1.2552698	LINC00963	long intergenic non-protein coding RNA 963 [Source:HGNC Symbol;Acc:48716] [ENST00000444184]	GGCAGGAATGAGGGTCCTCTCCATGCAAGGGGGGAAGATAGAAGAACAAAATTTCACCCT
A_33_P3301410	0.014860373	2.3541876E-4	up	1.3101094	EXOSC4	Homo sapiens exosome component 4 (EXOSC4), mRNA [NM_019037]	AGATGTGCACACCCTCTTAGATCGAGTGGTCCGGCAGCATGTGCGTGAGGCCTCTATCTT
A_23_P14564	0.013475838	1.9384682E-4	down	7.473623	GPR65	Homo sapiens G protein-coupled receptor 65 (GPR65), mRNA [NM_003608]	AACAAGTTTAAATTGTGTTGCTGATCCAATTCTGTACTGTTTTGTAACCGAAACAGGAAG
A_24_P291401	0.015464503	2.5225914E-4	down	1.152265	TMEM150A	Homo sapiens transmembrane protein 150A (TMEM150A), transcript variant 1, mRNA [NM_001031738]	TGTGAGTGGGTGTGTGTCATCGATATCCTCATTTTCTATGGCACCTTCAGCTACGAGTTT
A_24_P256552	0.014274331	2.1868407E-4	down	1.4573562	CSTF3	Homo sapiens cleavage stimulation factor, 3' pre-RNA, subunit 3, 77kDa (CSTF3), transcript variant 2, mRNA [NM_001033505]	GGTGGTTTTTAGTTTAATTTTTCTTTTCTAGCTTCCCATCGACGGTCAGTGCGCACGTTG
A_23_P24555	0.019703234	3.7996806E-4	down	1.5269426	PHLDB1	Homo sapiens pleckstrin homology-like domain, family B, member 1 (PHLDB1), transcript variant 1, mRNA [NM_015157]	CAACTGGGGCTTTTGTATAAGAAGACTTTAATATTCTGTAAGGAGCTTGGTCCTGTGAGT
A_33_P3283944	0.01655149	2.7932707E-4	down	1.2631761		O02402_PINFU (O02402) Insoluble protein, partial (5%) [THC2497807]	AATTCGGAAAGGTGTAAGCGGTTCTTTTCGCTGGTATCTTCTTTTATTTTCCTTGTATTG
A_24_P32520	0.006466237	4.468383E-5	down	1.2307118	RNF214	Homo sapiens ring finger protein 214 (RNF214), transcript variant 1, mRNA [NM_001077239]	GTCTGTATTCCAATGTTCGTAAATGAAACTATGTATATTATGCAGAAACAGTCTGTTCCC
A_23_P302568	0.01211882	1.5922953E-4	up	1.471648	SLC30A3	Homo sapiens solute carrier family 30 (zinc transporter), member 3 (SLC30A3), mRNA [NM_003459]	TGTCTCTGTGCCTATGTGGCTGTGCTATGGTTTCTATGAGTCTGCTCCATCCATGTGTCT
A_24_P310756	8.632388E-4	5.435766E-7	up	1.51548	FBXO28	Homo sapiens F-box protein 28 (FBXO28), transcript variant 1, mRNA [NM_015176]	TTGTGTCTGAAGAGAACCATGACATTTAGAAGTATATTGGTAATCTATTAGGTCCATTGG
A_19_P00320602	0.0040967725	1.7950295E-5	up	1.3066604	LINC00963	long intergenic non-protein coding RNA 963 [Source:HGNC Symbol;Acc:48716] [ENST00000444184]	TGCAATGTTGTGCTCCTGTTAGTCTGATATCAGGGGCTTGCAGCCTGGCAAAGGAAAAAA
A_33_P3273230	0.011462819	1.4144975E-4	up	1.686005	HORMAD1	Homo sapiens HORMA domain containing 1 (HORMAD1), transcript variant 1, mRNA [NM_032132]	CCCAGATTACCAGCCTCCCGGTTTTAAGGATGGTGATTGTGAAGGAGTTATATTTGAAGG
A_24_P391853	0.0016937907	2.7470103E-6	down	1.4213126			AACAAGCACATCATGGTTGTCTTGGGGACTGGCAACAACAAGATTAACTGGGCCATGGAG
A_23_P54230	0.013577457	1.975854E-4	up	1.1408334	ZC3H14	Homo sapiens zinc finger CCCH-type containing 14 (ZC3H14), transcript variant 2, mRNA [NM_207660]	TGTGCCTGCAAAGCCTGAAAGGAGACCTTCTCTTCCACCTTCTAAACAAGCTAACAAGAA
A_23_P210425	8.632388E-4	5.434797E-7	down	2.5515537	MYL9	Homo sapiens myosin, light chain 9, regulatory (MYL9), transcript variant 2, mRNA [NM_181526]	TGAGGAAGTGGACGAGATGTACCGGGAGGCACCCATTGATAAGAAAGGCAACTTCAACTA
A_23_P145644	0.017390113	3.0967005E-4	up	3.161138	DDC	Homo sapiens dopa decarboxylase (aromatic L-amino acid decarboxylase) (DDC), transcript variant 2, mRNA [NM_000790]	TCAATGTTCACGCAACTTGAAATTATATCTGTGGTCTTCAAATTGTCTTTTGTCATGTGG
A_33_P3285299	4.876452E-4	7.9726206E-8	down	6.195867	GPRIN2	Homo sapiens G protein regulated inducer of neurite outgrowth 2 (GPRIN2), mRNA [NM_014696]	GCTTTAGCACTGTGCAGAGGGGAGATCCTGAGTTTTCTGTAAAAAATGACCTTTTGTTCA
A_33_P3277890	0.014274331	2.1746363E-4	up	2.0179582		WASH and IL9R antisense RNA 1 [Source:HGNC Symbol;Acc:38513] [ENST00000399966]	GGCAGTGTATTTGTAATGGTACATAAAATGACGTCTGCTTTATAAGCATTCTCATTCCTA
A_23_P9523	0.003603008	1.4353719E-5	up	1.5455011	RBKS	Homo sapiens ribokinase (RBKS), mRNA [NM_022128]	CAGGCTGCAGGAACACAGTCATCTTACCCTTACAAAAAAGACCTTCCGCTTACTCTGTTT
A_33_P3354728	0.018189624	3.3056815E-4	up	1.2399111			ATTTTCTGGAAGAAGGCTGAAACTACCCAGATGATTGTGCTAAGGCTGGAATGTAGGGAG
A_23_P141100	0.011279095	1.353798E-4	down	1.3974342	ADAT1	Homo sapiens adenosine deaminase, tRNA-specific 1 (ADAT1), transcript variant 1, mRNA [NM_012091]	TGAGCTGAAATGATGTTTGACGCTCTGCAAGTTTTACAGCTTTGCCTAGCATAGCGAATA
A_23_P41075	0.012106103	1.587779E-4	up	1.2899917	MON1A	Homo sapiens MON1 secretory trafficking family member A (MON1A), transcript variant 1, mRNA [NM_032355]	TCTTCATTCTCACGCCCCTCACCTATTGATGGGAATGTGTGCGGGCTCAGCCTTCCTGGA
A_23_P71316	0.004194391	1.9618847E-5	down	3.8947554	RBPMS	Homo sapiens RNA binding protein with multiple splicing (RBPMS), transcript variant 3, mRNA [NM_001008712]	GAGGGTTCTCTTATAAAGCTCACATCTAAACAGCCTGTAGGTTTTGTCAGTTTTGACAGT
A_19_P00316901	0.0073173423	5.931715E-5	down	4.726025	RFX8	RFX family member 8, lacking RFX DNA binding domain [Source:HGNC Symbol;Acc:37253] [ENST00000492238]	TATGTACCTATGTTGTAGTCATTGAGTTCTGGAAGGTGAGATCGATATTCAGTGTAATCA
A_23_P15123	0.014849314	2.3444359E-4	down	1.2405784	UBFD1	Homo sapiens ubiquitin family domain containing 1 (UBFD1), mRNA [NM_019116]	ATCTGAGGTGATGTGGTGACTGAAGCCAGAGGTGATGTACTTTCACCATTAGCTTAATTT
A_33_P3254311	0.019283885	3.6396662E-4	up	2.0655303		T cell receptor beta variable 30 (gene/pseudogene) [Source:HGNC Symbol;Acc:12214] [ENST00000417977]	TGAGTTCTAAGAAGCTCCTTCTCAGTGACTCTGGCTTCTATCTCTGTGCCTGGAGTGTCA
A_24_P101800	0.015261511	2.4787177E-4	up	3.5406032	C20orf112	chromosome 20 open reading frame 112 [Source:HGNC Symbol;Acc:16106] [ENST00000485364]	TTCGTGTGATGACCGAGGTTACTGTATATTGAGCATTCAGTGTATGCTGGCACTGTGCAT
A_33_P3391915	0.003603008	1.4382564E-5	down	2.316292	BTBD17	Homo sapiens BTB (POZ) domain containing 17 (BTBD17), mRNA [NM_001080466]	TCACAGCTGACTTGAAGGAACGTTCTTGGTCCTGAATAAACCGATGCTCAGAGTGGTAAA
A_33_P3610123	0.0152187925	2.4646253E-4	down	1.3994546	POLR1A	Homo sapiens polymerase (RNA) I polypeptide A, 194kDa (POLR1A), mRNA [NM_015425]	TGGACAGAAAAGACAGAGAGGACTTGTACAAAGGCTTTGTAAAACCAGAGGCTAGCTTCT
A_23_P9711	0.017386213	3.0769012E-4	up	1.5433465	HS3ST4	Homo sapiens heparan sulfate (glucosamine) 3-O-sulfotransferase 4 (HS3ST4), mRNA [NM_006040]	ATTAAACTGTCATTTCTCCCGCTAAATGAAAACCGTGTTGTTATAAAGCTTAATGCAACC
A_19_P00805702	0.008628208	8.152638E-5	up	1.9814262	C1GALT1	Homo sapiens core 1 synthase, glycoprotein-N-acetylgalactosamine 3-beta-galactosyltransferase, 1 (C1GALT1), mRNA [NM_020156]	CACCATTAAGTCAGAAAAATGTATTTTTAAATGTTTCTTGAAGTGCCTTTTGAACATTTT
A_23_P37598	0.003184709	1.1418548E-5	down	1.4731119	NPTN	Homo sapiens neuroplastin (NPTN), transcript variant b, mRNA [NM_012428]	TGAAACTGGTGGCAACATGACCTGCTAAAATTTTCTGCTTGGACCTCTTTGGTTCTCTCC
A_23_P38167	0.013885919	2.086342E-4	up	1.5397124	GPRC5C	Homo sapiens G protein-coupled receptor, family C, group 5, member C (GPRC5C), transcript variant 1, mRNA [NM_022036]	TCCAGCCAAATAGTGTTCTCGGGGTGGTGGCTGGGCAGCGCCTATGTTTCTCTGGAGATT
A_24_P302574	0.017390113	3.0982972E-4	up	1.8874078	OSGEPL1	Homo sapiens O-sialoglycoprotein endopeptidase-like 1 (OSGEPL1), mRNA [NM_022353]	CCTGTAGACATGCTAAGGAAAATCTGCTTAGTATCGAGATCAAGAACTTTCATTCAAAAA
A_23_P209726	0.0042243116	2.0437094E-5	down	1.7214918	SP140	Homo sapiens SP140 nuclear body protein (SP140), transcript variant 1, mRNA [NM_007237]	AGGGGCTTTTCTCTGAGCCTCCTTCATCTGCCCAAAGACAAATCCTCAAAAGGAAATTCA
A_19_P00811234	0.014513954	2.2686049E-4	down	2.1411605			CTACAGGTTTAAGGGCTTAAATCTCAACCTTTGTGTTAGGAGTAACAGGAGTGTGCTGAG
A_32_P32413	0.015805542	2.6284155E-4	down	1.8793858	SETBP1	Homo sapiens SET binding protein 1 (SETBP1), transcript variant 1, mRNA [NM_015559]	TGGACTTGCTGTTATTTGAGGCGTAGATACATCTAGCATGCTTACTGTCATGCTCCTCCA
A_23_P14482	0.013577457	1.9778707E-4	up	1.1890515	C14orf166	Homo sapiens chromosome 14 open reading frame 166 (C14orf166), mRNA [NM_016039]	TCACATTCTCGGGGGAGGAAGCCCAGAAAATTGGGTATGTTCTAGAGATTTACCACCATT
A_23_P163227	0.006814032	5.0610743E-5	up	1.9426907	CKMT1A	Homo sapiens creatine kinase, mitochondrial 1A (CKMT1A), mRNA [NM_001015001]	CATTAACTCCCCATCGCCAGCTGATGACTCAAGATTCCAAGGAGTTCTGCTCATTCTAAT
A_23_P408996	0.018690145	3.4617074E-4	up	1.7678379	MBOAT1	Homo sapiens membrane bound O-acyltransferase domain containing 1 (MBOAT1), transcript variant 1, mRNA [NM_001080480]	ATTGGAAAGCAGACATTGAAAGTTTTCTTTTCTATCTTTGTTATGAATGTGCTATGGCCC
A_23_P408455	0.003682133	1.4886047E-5	up	1.4203653	SLC25A36	Homo sapiens solute carrier family 25 (pyrimidine nucleotide carrier ), member 36 (SLC25A36), transcript variant 1, mRNA [NM_001104647]	CCATTAACCTACACACTGATTTTTATGCTACTCCTTGTAGAAACAAAATTCTGGTTTGAC
A_23_P64232	0.01129867	1.3756519E-4	down	1.2512448	ZNF259	Homo sapiens zinc finger protein 259 (ZNF259), mRNA [NM_003904]	AGCGCTGCTCTTTCTGTAGGTTATTTATTAGTATTGGATGAAGGCGAAGGCTGGGAGTGT
A_23_P63209	0.006752413	4.9276445E-5	down	3.491665	HSD11B1	Homo sapiens hydroxysteroid (11-beta) dehydrogenase 1 (HSD11B1), transcript variant 2, mRNA [NM_181755]	TGGGACTGTTCTGTCTCATGTTTATCTGAGCTCTTATCTATGAAGACATCTTCCCAGAGT
A_33_P3252286	0.0026611327	6.8053682E-6	down	1.534245	CRLF1	Homo sapiens cytokine receptor-like factor 1 (CRLF1), mRNA [NM_004750]	TCCCCATTACCTAGGGCCCCTCCAAAAGAGTCCTTTTAAATAAATGAGCTATTTAGGTGC
A_19_P00810465	0.0042652697	2.1153412E-5	up	1.8274652	KCNA6	Homo sapiens potassium voltage-gated channel, shaker-related subfamily, member 6 (KCNA6), mRNA [NM_002235]	TTGGGGTGAAGCTGTAGGAACAGGGTGAAAGCTGGTGGTGTGAGCAAAGAGACCAGCTAT
A_23_P27285	0.0068290303	5.1046205E-5	up	1.3651735	MPPE1	Homo sapiens metallophosphoesterase 1 (MPPE1), transcript variant 1, mRNA [NM_023075]	CCGTCTCTCTGCACAGCACAGAAATTCTCAATCACTGAAATGAGTAACTGCAAAATAAAT
A_23_P401380	0.002681902	7.597485E-6	down	1.6107271	DIP2B	Homo sapiens DIP2 disco-interacting protein 2 homolog B (Drosophila) (DIP2B), mRNA [NM_173602]	GGCCAAATAAATTACTTTCCTTGAATATCCAGGAATCTTTTAGTCTAAAGCAATGAGGAG
A_24_P92367	0.012648633	1.7154215E-4	down	1.4156275	YDJC	Homo sapiens YdjC homolog (bacterial) (YDJC), mRNA [NM_001017964]	TGCCACCTCTGGGCTCAGGTCCTCATGCCTCCAAATGGCATCTAGAGTTTGAGCAGCCTT
A_33_P3376965	0.01688595	2.913218E-4	up	1.6076342	CHAC1	Homo sapiens ChaC, cation transport regulator homolog 1 (E. coli) (CHAC1), transcript variant 1, mRNA [NM_024111]	TTCTCCGGCCACAACCTTGAATACTTGCTGCGTCTGGCAGACTTCATGCAGCTCTGTGGG
A_32_P206839	0.016960222	2.9472544E-4	up	1.494972	LOC100288911	Homo sapiens uncharacterized LOC100288911 (LOC100288911), long non-coding RNA [NR_037631]	TTTTCTTTCTCAGTTCACGGACAAAAGTGGTGGGTTTTCATTGTCTTCACTGATTGTCAA
A_33_P3243657	0.016960222	2.956568E-4	down	1.24408	TIMM10B	Homo sapiens translocase of inner mitochondrial membrane 10 homolog B (yeast) (TIMM10B), mRNA [NM_012192]	GGAGGACCCTTCCACATCAACATTTGTGTGTATCCTTGCAATAAACTTCCATTGTGAATT
A_33_P3402526	0.004412683	2.2340539E-5	down	1.5306772	CSGALNACT2	Homo sapiens chondroitin sulfate N-acetylgalactosaminyltransferase 2 (CSGALNACT2), mRNA [NM_018590]	GAAATAGAGACGCATCTTCATAAACAGGCATACAGGACAAACAGCGAAGCTGTTGGTTGA
A_32_P162250	0.010165504	1.1217684E-4	down	1.8991956	ARHGAP18	Homo sapiens Rho GTPase activating protein 18 (ARHGAP18), mRNA [NM_033515]	AAGTCCTGAATAAGTCTACTGGAAGAATTATTCTTCTGGGTGAAAAAGCTTTTGTTTGTG
A_33_P3225552	0.016796306	2.8696074E-4	down	1.3678312	SDAD1	Homo sapiens PRO1405 mRNA, complete cds. [AF132198]	TGGAAAATGGATTTGTTTTGGTTTTCTTCCTCACAAATTCTTTTCGGTCTGTCTTTCCAG
A_23_P328740	0.0035118614	1.32622245E-5	up	2.0746915	NEURL3	Homo sapiens neuralized E3 ubiquitin protein ligase 3 (NEURL3), transcript variant 2, mRNA [NM_001285486]	CTGAAGATGATTTAAAACATGAAAGTGTATTGTTGTCACTGTGGTAATTTCCTTGCCAGT
A_33_P3385671	0.009276503	9.546486E-5	down	3.0058138			TAACTTGCTTTTAAACCCCTTGAAAATACCGCTGCAGTGTGGCTTTCTCTGCTCCATTGC
A_33_P3265129	0.00909149	9.083902E-5	down	1.9617792		Uncharacterized protein; cDNA FLJ34659 fis, clone KIDNE2018863 [Source:UniProtKB/TrEMBL;Acc:Q8NAW3] [ENST00000593357]	ACAGCTTGGAAGCTGAAGACCCAGGAAAGCCAATGTGTATATCCAGTCTTAGTCTGAAGA
A_23_P57910	0.017315943	3.0565925E-4	down	2.5267067	RTP3	Homo sapiens receptor (chemosensory) transporter protein 3 (RTP3), mRNA [NM_031440]	TCCTACGCATGCCAAAACCACATCTGTAGGAACTTAAGCATTTTCTGCTGTTGTGTCATT
A_33_P3400319	0.0035341117	1.3456954E-5	down	3.0802188		Uncharacterized protein [Source:UniProtKB/TrEMBL;Acc:H7C4H0] [ENST00000383686]	TCTGAAAAGAAGTGTGAAATCATCAAAAGAGCCATTGGAGGGGACACCAGAGAGTCGTGT
A_19_P00320294	0.0026611327	6.963847E-6	down	2.642826			TTAAGAATTTCCCTAGAGGGTCGGGTATCATCTCAGCCAGATCTTTCTCATCCTTCAAGG
A_19_P00318769	0.0035118614	1.3289686E-5	down	3.561249	RFX8	Homo sapiens RFX family member 8, lacking RFX DNA binding domain (RFX8), mRNA [NM_001145664]	CATGACTTCTTGGAAGATGTTTCTATTCAGTACCTGAAATCTGTGCAGTTATTTAGTAAG
A_19_P00805678	0.01980088	3.8583152E-4	down	2.4733846			TGTCCAGAGTTCCATTAAAGTGGTGTGTGTTCTCTTTGCCTTTGTGAGTAGACTTCTGAT
A_33_P3319940	0.019552186	3.737563E-4	down	2.291773	ATRX	Homo sapiens alpha thalassemia/mental retardation syndrome X-linked (ATRX), transcript variant 1, mRNA [NM_000489]	GACAACAGGTCAATCATTTTCAAAAAGATTCCATTTATAGACACCCTTCATTGCAAGTTC
A_33_P3228985	0.016785363	2.8564114E-4	down	2.8984363	ZNF705B	Homo sapiens zinc finger protein 705B (ZNF705B), mRNA [NM_001193630]	TGTGGAAAATCCCTTCGTAATCTTTTGTCCCCTAAACCACGTAAACAAATTCATACTAAA
A_33_P3350247	0.0026611327	7.00545E-6	down	3.3591032			TTTTTCTCTTCTCAGGATTCTAGTCACAGTTAACAGGGATCCCTATCAAGAGCCACCCCA
A_23_P79108	0.0063194823	4.2481417E-5	down	3.3940294	ATP8B3	Homo sapiens ATPase, aminophospholipid transporter, class I, type 8B, member 3 (ATP8B3), transcript variant 1, mRNA [NM_138813]	TCTAAAGACAAGGACTCCACATGCTTTTCTTTTTCTAATAAACCAGGGTCCATCTGACCC
A_19_P00319730	0.007533945	6.197863E-5	down	4.094444			GTCCACTCCAGATGGTCCTCAGGGAAAGAACTTTCTCCACACGGTCATGTGAGCAGGCTC
A_33_P3285420	0.006127546	4.0903116E-5	down	2.706476	LINC01020	Homo sapiens long intergenic non-protein coding RNA 1020 (LINC01020), long non-coding RNA [NR_026994]	CTCAGTGTAGCCAAAGATTCCTTGCCTACAAGAAAGTCTTGCTCAGACAATAAACCACGG
A_33_P3312187	0.0071136244	5.5009576E-5	down	1.5324618			TCTTTAGCACACCTAGCGACACGGTCACAATCACATGGTCCGCCGGGATCAGCTCACAGT
A_19_P00330702	0.008731465	8.311772E-5	down	2.9883015			GGGATAGACATCATGATAAAAACTCAACTTGCTCTTTCTATGTGGCCATTCTCAATGCAC
A_33_P3374553	0.002681902	7.233364E-6	down	4.636539			ACAAAGAATGACGCCCAGTTTCTAAGAGTCATTCCGTGCTTTACAATCAGCCCACAACCA
A_19_P00321005	0.0040967725	1.8539537E-5	down	3.6583772		Human autonomously replicating sequence (ARS); O-family homologous repeat region mRNA. [L08443]	TTGGAAGGTTCTCCTCCATCTTCAGATGACATAAACATACACCTATTTGGCCTTTTGAAA
A_24_P219785	0.011874455	1.5080978E-4	down	1.4705477	CALM3	Homo sapiens calmodulin 3 (phosphorylase kinase, delta) (CALM3), mRNA [NM_005184]	GGAGATGGCACTATCACCACCAAGGAGTTGGGGACAGTGATGAGATCCCTGGGACAGAAC
A_19_P00332128	0.014964902	2.3848169E-4	down	2.2223363			ACATTGGTGGTCCAGCCCAGCCACAGTGGAAAGAGCTCGTTAACGTCTTATTAACATCTC
A_33_P3266091	0.015623293	2.5538492E-4	down	2.436513			AAGTCAGACTCCGGAGCTGTGCAGTGCAGCCCTGGCTACAGAAAGCTGCTTCGTCTGAAT

## Sheet: FC > 1.5 U shRNA Ki-67 vs CTRL
ProbeName	FC ([shRNA Ki-67] vs [shRNA CTRL])	Regulation ([shRNA Ki-67] vs [shRNA CTRL])	GeneSymbol	Description	Sequence
A_23_P103110	2.1734319	up	MAFF	Homo sapiens v-maf avian musculoaponeurotic fibrosarcoma oncogene homolog F (MAFF), transcript variant 1, mRNA [NM_012323]	CTCCCTGGGAAAAGTGGCGTATGGCCCTGAGCTGGGCTTTATATTTTATATCTGCAAATA
A_23_P136405	2.1610968	up	PDCD1	Homo sapiens programmed cell death 1 (PDCD1), mRNA [NM_005018]	GCTGGGACAAGGGATCCCCCTTCCCTGTGGTTCTATTATATTATAATTATAATTAAATAT
A_23_P110504	1.5312439	up	CLPTM1L	Homo sapiens CLPTM1-like (CLPTM1L), mRNA [NM_030782]	CTGCCGCCAGCCAAGTGCAACTTGAATTGTCAATGAGTATTTTTGGAAGCATTTGGAGGA
A_23_P214821	3.1240795	up	EDN1	Homo sapiens endothelin 1 (EDN1), transcript variant 1, mRNA [NM_001955]	AGGCGCCTGGCACATTTCAGGGAGAAACTCCAAAGTCCACACAAAGATTTTCTAAGGAAT
A_23_P134454	1.5327812	up	CAV1	Homo sapiens caveolin 1, caveolae protein, 22kDa (CAV1), transcript variant 1, mRNA [NM_001753]	ATTCCTCCTGCTCATATTGTGATTCTCACTTTGGGGACTTTTCTTAAACCTTCAGTTATG
A_23_P103877	3.2948544	up	LRRC38	Homo sapiens leucine rich repeat containing 38 (LRRC38), mRNA [NM_001010847]	ATATAATAGGCCTCAGCAACCTTGGGATGTTATACTGGGAACTAATAAACTCGTGTGCAA
A_23_P120002	1.6127547	up	SP110	Homo sapiens SP110 nuclear body protein (SP110), transcript variant b, mRNA [NM_004510]	AAGGAACGCAAAGAACTGGAAACGGAATATACGTTGTGAAGGAATGACCCTAGGAGAGCT
A_24_P304154	1.984189	up	AMPD3	Homo sapiens adenosine monophosphate deaminase 3 (AMPD3), transcript variant 3, mRNA [NM_001025390]	AAAGCATTTTTAAAGATTAATCTGAATTAAGCTTTATCAGTGTACTCTTTATCTGTGTTA
A_23_P204847	1.7524626	up	LCP1	Homo sapiens lymphocyte cytosolic protein 1 (L-plastin) (LCP1), mRNA [NM_002298]	ACGCCCTCTATCATGGTGAAAAGCTCCATCAATGAGGTATCTTCTTTAGTGGTGGTATGT
A_23_P87150	2.0019047	up	LPXN	Homo sapiens leupaxin (LPXN), transcript variant 2, mRNA [NM_004811]	AAATTTAAACCAAGAGAGGAGAGGAAAGGGTAAATTTTCTGTTACTGACCTTCTGCTTAA
A_23_P426989	1.8950375	up	SH3BP5L	Homo sapiens SH3-binding domain protein 5-like (SH3BP5L), mRNA [NM_030645]	AAGATGGAGTGCTCTTTTCTAGGCCCATGTTCTGCCAGCAACCGGGATGCGTGGGCAACT
A_32_P213091	3.2683294	up	SHISA9	Homo sapiens shisa family member 9 (SHISA9), transcript variant 2, mRNA [NM_001145205]	TTCTTAGGCATTTGTGTGGCTTGGAGCACATAGTTGGTTCTTTCTACTGTCTAATTCATT
A_24_P12626	1.5926138	up	CAV1	Homo sapiens caveolin 1, caveolae protein, 22kDa (CAV1), transcript variant 1, mRNA [NM_001753]	TTGACTTTGAAGATGTGATTGCAGAACCAGAAGGGACACACAGTTTTGACGGCATTTGGA
A_23_P368691	1.7725952	up	ABCC9	Homo sapiens ATP-binding cassette, sub-family C (CFTR/MRP), member 9 (ABCC9), transcript variant SUR2A, mRNA [NM_005691]	ATTCTGCAGGATCCAATACTATTCAGTGGTTCCATTAGATTTAATTTAGATCCAGAGTGC
A_23_P147786	2.49064	up	RIMS2	Homo sapiens regulating synaptic membrane exocytosis 2 (RIMS2), transcript variant 2, mRNA [NM_014677]	GATGAACTAGAGCTATCCAATATGGTGATTGGATGGTTCAAACTTTTCCCACCTTCCTCC
A_24_P416645	2.6022837	up	KLK13	Homo sapiens kallikrein-related peptidase 13 (KLK13), mRNA [NM_015596]	ATGTGCCAACATCCAACTTCGCTCAGATGAGGAGTGTCGTCAAGTCTACCCAGGAAAGAT
A_23_P325661	1.6220201	up	ZNF134	Homo sapiens zinc finger protein 134 (ZNF134), mRNA [NM_003435]	TGCTGGTGGCTTATACAAAAAGTTTACTTTCTTCATGGATATTCTTGGTCTCACATACTT
A_33_P3257518	2.7906857	up	FLJ22447	Homo sapiens uncharacterized LOC400221 (FLJ22447), long non-coding RNA [NR_039985]	GTTGAACAGCACTAATTTTTTCACTTGGAGCTAGCACATGTTTATGACTAGTACAAGTTT
A_33_P3420635	1.5597202	up	OR4D6	Homo sapiens olfactory receptor, family 4, subfamily D, member 6 (OR4D6), mRNA [NM_001004708]	TCATTACCCCCATGCTGAACCCCATCATCTATTCCCTGAGAAATCAAGAGATGAAGTCAG
A_33_P3663974	3.7078664	up	THRB	Homo sapiens thyroid hormone receptor, beta (THRB), transcript variant 4, mRNA [NM_001252634]	TTACCGAAAACACCACGTGACACACTTTTGGCCAAAACTCCTGATGAAGGTGACAGATCT
A_23_P135990	2.0721307	up	SLCO2A1	Homo sapiens solute carrier organic anion transporter family, member 2A1 (SLCO2A1), mRNA [NM_005630]	TGTTACAGACAAGCTTATTTCCAAAGCCACCTCATTTCCAAACATCTCACTCAGGAAGGG
A_24_P887857	1.9238266	up			ATGAGTAGTACGAGAAGATGGCAGAGAAGAACCGCAAGGATGCCAAGGATTGGTTCTTCA
A_33_P3366221	1.8393309	up	NTNG1	Homo sapiens netrin G1 (NTNG1), transcript variant 3, mRNA [NM_014917]	GATTTCTTTACAGTCACAGACCTGAGGATAAGGCTGTTAAGACCAGCCGTTGGGGAAATA
A_23_P7083	1.9776614	up	CTBP1-AS2	Homo sapiens CTBP1 antisense RNA 2 (head to head) (CTBP1-AS2), long non-coding RNA [NR_033339]	TGGGAACGTCGATGAGGTATTAAAGGAAACCACTGGTCTTGTCAGTCATGTACACACAGA
A_23_P102681	3.0590847	up		HCG1785561; MGC4294 protein; Uncharacterized protein [Source:UniProtKB/TrEMBL;Acc:Q9BU82] [ENST00000598340]	ACTGACAAATCGAGTGGGCAAACGGCTTACTCAAAGGCCAGGAGCAGCTACCCGATGACT
A_23_P67529	1.8166881	up	KCNN4	Homo sapiens potassium intermediate/small conductance calcium-activated channel, subfamily N, member 4 (KCNN4), mRNA [NM_002250]	ACTCTCACTATGCTGCTATGGACGACCTCCAGCTCTCAGTTACAAGTGCAGGCGACTGGA
A_23_P48740	3.580729	up	DIO2	Homo sapiens deiodinase, iodothyronine, type II (DIO2), transcript variant 1, mRNA [NM_013989]	GCCCATGTCACTGGTCAGCGTGGTTTTTATGTGTATTAGGATTGGGGGATGTGAAGAAAT
A_23_P126416	2.5819025	up	TIE1	Homo sapiens tyrosine kinase with immunoglobulin-like and EGF-like domains 1 (TIE1), transcript variant 1, mRNA [NM_005424]	GTGAACATGTCGCTGTTTGAGAACTTCACTTACGCGGGCATTGATGCCACAGCTGAGGAG
A_23_P106389	1.5282742	up	SEMA7A	Homo sapiens semaphorin 7A, GPI membrane anchor (John Milton Hagen blood group) (SEMA7A), transcript variant 1, mRNA [NM_003612]	GCCTTGCATGTTTATTGAAGGATGTTTGCTTTCCGGACGGAAGGACGGAAAAAGCTCTAT
A_24_P228130	3.1016557	up	CCL3L3	Homo sapiens chemokine (C-C motif) ligand 3-like 3 (CCL3L3), mRNA [NM_001001437]	TTCCACAGAATTTCATAGCTGACTACTTTGAGACGAGCAGCCAGTGCTCCAAGCCCAGTG
A_33_P3276703	2.5319219	up	VGF	Homo sapiens VGF nerve growth factor inducible (VGF), mRNA [NM_003378]	CTCTGTTGTAAATACCCCTCACGGAGGAAATAGTTTTGCTAAGAAATAAAAGTGACTATT
A_33_P3267186	1.617093	up	ATP2B1	Homo sapiens ATPase, Ca++ transporting, plasma membrane 1 (ATP2B1), transcript variant 2, mRNA [NM_001682]	ATACCTGAGGAGGAATTAGCAGAGGATGTTGAAGAGATTGATCACGCTGAAAGGGAGTTG
A_23_P141173	3.281224	up	MPO	Homo sapiens myeloperoxidase (MPO), mRNA [NM_000250]	CCTGTTCTGGGTGCAGCTGAGAAAATGAGTGACTAGACGTTCATTTGTGTGCTCATGTAT
A_23_P87011	2.5864923	up	TAGLN	Homo sapiens transgelin (TAGLN), transcript variant 1, mRNA [NM_001001522]	ACCCGTGTGGTACCTTCAGCCCTGGCCAAGCTTTGAGGCTCTGTCACTGAGCAATGGTAA
A_33_P3341499	1.635432	up	WNT5A	Homo sapiens wingless-type MMTV integration site family, member 5A (WNT5A), transcript variant 1, mRNA [NM_003392]	GCATCTTAGACCATTTTTATATGCAGTGTACAATTTGCTGGGCTAGAAATGAGATAAAGA
A_33_P3219601	2.0022385	up	ABL2	Homo sapiens c-abl oncogene 2, non-receptor tyrosine kinase (ABL2), transcript variant b, mRNA [NM_007314]	CCTGTCCTTAATAACTTATTGTCATGTGTACAGGAAATCAGTGATGTGGTGCAGAGGTAG
A_23_P153320	5.0109634	up	ICAM1	Homo sapiens intercellular adhesion molecule 1 (ICAM1), mRNA [NM_000201]	GAAATACTGAAACTTGCTGCCTATTGGGTATGCTGAGGCCCACAGACTTACAGAAGAAGT
A_33_P3233645	2.527026	up	MT1G	Homo sapiens metallothionein 1G (MT1G), mRNA [NM_005950]	CCCGTAAAATCTAGGATTTTTTGTTTTTTGCTACAATCTTGACCCCTTTGCTACATTCCC
A_23_P210643	1.5921156	up	NELFCD	Homo sapiens negative elongation factor complex member C/D (NELFCD), mRNA [NM_198976]	ATGGTTCACCTGCTGAGTCGAGGTTATGTACTTCCTGTTGTCAGTTACATCCGAAAGTGT
A_23_P83923	1.5340691	up	ZNF672	Homo sapiens zinc finger protein 672 (ZNF672), mRNA [NM_024836]	TGAGGACCATTTTCACTGGGACCCAGGCCAAAACCATGTGGGTGCACAAAGCCAGGCACT
A_23_P404481	2.1522202	up	S1PR1	Homo sapiens sphingosine-1-phosphate receptor 1 (S1PR1), mRNA [NM_001400]	GCTGAGGCCAAAGTTTCCATGTAAGCGGGATCCGTTTTTTGGAATTTGGTTGAAGTCACT
A_33_P3320538	3.1212265	up	NUPL1	nucleoporin like 1 [Source:HGNC Symbol;Acc:20261] [ENST00000463407]	GGTGTAATGTAGCAGAGCTTAAGAATAGAACTCAATTATCACTTTTTGTGAACAAGTTGG
A_24_P53976	2.4656188	up	GLUL	Homo sapiens glutamate-ammonia ligase (GLUL), transcript variant 1, mRNA [NM_002065]	ACGGGGCACCAAATTTGAGACAAATAGTCGGATTAGAAATAAAGCATCTCATTTTGAGTA
A_24_P82880	1.5191044	up	TPM4	Homo sapiens tropomyosin 4 (TPM4), transcript variant 2, mRNA [NM_003290]	GTGACCTGGAAGAAGAACTCAAGAATGTTACTAACAATCTGAAATCTCTGGAGGCTGCAT
A_23_P15542	1.9666051	up	HSD17B1	Homo sapiens hydroxysteroid (17-beta) dehydrogenase 1 (HSD17B1), mRNA [NM_000413]	CTGTGGGTGGCTAATTAAGATAGATCGCGTTAGCCAGTTTTACCAGCGCAGCTAGGCGCG
A_33_P3307495	2.224328	up	STRA6	Homo sapiens stimulated by retinoic acid 6 (STRA6), transcript variant 8, mRNA [NM_001199042]	TTTATGCCTTTGGCTATTATGAAAGAGGTTAGTGTGTTCCCTGCAATAAACTTGTTCCTG
A_23_P258612	1.84418	up	ATP8A2	Homo sapiens ATPase, aminophospholipid transporter, class I, type 8A, member 2 (ATP8A2), mRNA [NM_016529]	ACTCGTCTGCAGTGCTTAGCCTAACTTTTGTTTATGTCGTTATGAAGCATTCAACTGTGC
A_23_P254816	2.3460782	up	TCF15	Homo sapiens transcription factor 15 (basic helix-loop-helix) (TCF15), mRNA [NM_004609]	AACAAAGACTGTTGGTGACAGGGTGTGTGTGTATCTGTGCGTGAGTGTGAGTGTGTGTGA
A_33_P3237517	2.1698358	up	ZNF292	zinc finger protein 292 [Source:HGNC Symbol;Acc:18410] [ENST00000369578]	GGGAGGACTTGCTCCTTTTATTGGAGAATGGTATTAGAAACCAAGATCTATATTAAACTA
A_33_P3226832	1.6117871	up	F3	Homo sapiens coagulation factor III (thromboplastin, tissue factor) (F3), transcript variant 1, mRNA [NM_001993]	CCTAATATGCTTTACAATCTGCACTTTAACTGACTTAAGTGGCATTAAACATTTGAGAGC
A_23_P62920	1.5466222	up	KIFAP3	Homo sapiens kinesin-associated protein 3 (KIFAP3), transcript variant 1, mRNA [NM_014970]	TGTGTGGGTTGGGTTAATTTTGGATCTTTGCCTAATAATGCATGTTGATGTTATTGTGGG
A_23_P40108	3.6558943	up	COL9A3	Homo sapiens collagen, type IX, alpha 3 (COL9A3), mRNA [NM_001853]	TCAAAAGGCCCTAGCTAATAAACCTGTAAGCCCAGCATTTGAGAGAAGGTAGGGTGTGTA
A_24_P236935	2.7411375	up	KLK6	Homo sapiens kallikrein-related peptidase 6 (KLK6), transcript variant B, mRNA [NM_001012964]	GAAGCATAACCTTCGGCAAAGGGAGAGTTCCCAGGAGCAGAGTTCTGTTGTCCGGGCTGT
A_33_P3348474	1.8303744	up	LOC100128840	Homo sapiens cDNA FLJ25336 fis, clone TST00709. [AK058065]	TTACTAAAACAAGTAAACTGTCAGGAGGGCAGGCTTTGTTTGAAGCTTTTCATAACATAA
A_24_P882732	1.7320058	up		keratin 17 pseudogene 1 [Source:HGNC Symbol;Acc:6428] [ENST00000582047]	CCCAGCTTCTCTGCGAGATGGAGCAGCAGAACCAGGAGTACAAGATCCTCCTGGACATGA
A_23_P321913	1.863517	up	DEF6	Homo sapiens differentially expressed in FDCP 6 homolog (mouse) (DEF6), mRNA [NM_022047]	CAGGCCAGCACCAACGTGAAACACTGGAATGTCCAGATGAACCGGCTGATGCATCCAATT
A_24_P53215	1.8226151	up	UNC13D	Homo sapiens unc-13 homolog D (C. elegans) (UNC13D), mRNA [NM_199242]	TACAGGCACAGAGTCTCCTGGAAAAGGGAGAGGGGACCCTGCCAAAGATGAGGCTCCAGC
A_24_P706340	2.4079185	up	FAM155A	Homo sapiens family with sequence similarity 155, member A (FAM155A), mRNA [NM_001080396]	CTGTCTTTATGTCCTGTCAGCTTCTATTAGAGGAATGATTGCTATGACCTCATGGTATAG
A_23_P164623	1.6062137	up	ZBTB45	Homo sapiens zinc finger and BTB domain containing 45 (ZBTB45), mRNA [NM_032792]	CATCATATATGGGGGCTGGGCCTCGGGACTCTCGCTCTAATAAAGGACTGTAGGCCATGG
A_23_P110531	1.6850759	up	FST	Homo sapiens follistatin (FST), transcript variant FST344, mRNA [NM_013409]	CTGTGAAGATATCCAGTGCACTGGTGGGAAAAAATGTTTATGGGATTTCAAGGTTGGGAG
A_33_P3211818	1.5338879	up	RUNX1	Homo sapiens runt-related transcription factor 1 (RUNX1), transcript variant 2, mRNA [NM_001001890]	TTTCACCTGGACGTGCCAGCGGCATGACAACCCTCTCTGCAGAACTTTCCAGTCGACTCT
A_23_P76731	1.5086951	up	MOK	Homo sapiens MOK protein kinase (MOK), transcript variant 1, mRNA [NM_014226]	TATATGAATCAAAACAAACGAGCAGGCATTTCTGTGATGTGTTGGGCGTGGTTGGAAGGT
A_24_P334130	2.5638175	up	FN1	Homo sapiens fibronectin 1 (FN1), transcript variant 7, mRNA [NM_054034]	AATACTCTTTCTGCACAGACCACACTGTTTTGGTTCAGACTCGAGGAGGAAATTCCAATG
A_33_P3218832	2.2469323	up	RIMS1	Homo sapiens regulating synaptic membrane exocytosis 1 (RIMS1), transcript variant 1, mRNA [NM_014989]	CCACTTGTCTTAACACTCCCCTGTGCTTTTAAATGAAATTCCAATTCATGTATGTAAACA
A_33_P3318343	2.2078001	up	CTAG2	Homo sapiens cancer/testis antigen 2 (CTAG2), transcript variant 2, mRNA [NM_020994]	TCCCTGTTGATGTGGATCACGCAGTGCTTTCTGCCCGTGTTTTTGGCTCAGGCTCCCTCA
A_33_P3279545	1.6622847	up	HIPK3	Homo sapiens homeodomain interacting protein kinase 3 (HIPK3), transcript variant 1, mRNA [NM_005734]	GTCTGATTTTTCAGAATGATCTAGCTTCAAGAAAAGCAAGCAGTTAGTAGTGCTTAAGAA
A_33_P3345534	1.843208	up	KRT14	Homo sapiens keratin 14 (KRT14), mRNA [NM_000526]	CCAGTATGAGAAGATGGCAGAGAAGAACCGCAAGGATGCCGAGGAATGGTTCTTCACCAA
A_23_P500381	1.6946298	up	HTR7	Homo sapiens 5-hydroxytryptamine (serotonin) receptor 7, adenylate cyclase-coupled (HTR7), transcript variant d, mRNA [NM_019859]	TAACTCCCATTGACATTGCTTCTTACCAGACATGGGGAAAAGCTACCTTTCCTGAAAGGG
A_23_P87013	2.528826	up	TAGLN	Homo sapiens transgelin (TAGLN), transcript variant 1, mRNA [NM_001001522]	CCGTGGAGATCCCAACTGGTTTATGAAGAAAGCGCAGGAGCATAAGAGGGAATTCACAGA
A_33_P3221408	1.9745066	up	NTNG1	Homo sapiens netrin G1 (NTNG1), transcript variant 1, mRNA [NM_001113226]	GGCAACGAACGTGCTGGCATCAAAGAATATCAGTTTACATATATAACAAGTGTAATAAGA
A_23_P433855	2.3561873	up	RGS4	Homo sapiens regulator of G-protein signaling 4 (RGS4), transcript variant 2, mRNA [NM_005613]	ATCTGATTCCTGTGAACACAATTCTTCCCACAACAAGAAGGACAAAGTGGTTATTTGCCA
A_32_P62963	1.8826858	up	KRT16P2	Homo sapiens keratin 16 pseudogene 2 (KRT16P2), non-coding RNA [NR_029392]	TGGCGTGGACCTGAGCTGCATCCTGAATGAGATGCGCAACCAGTACGAGCAGATGGCAAA
A_23_P39955	3.636666	up	ACTG2	Homo sapiens actin, gamma 2, smooth muscle, enteric (ACTG2), transcript variant 1, mRNA [NM_001615]	TAAAGTCAGAACAGGTTCTCCAAGGATCCCCTCGAGACTACTCTGTTACCAGTCATGAAA
A_33_P3328559	1.744989	up	TBC1D10C	Homo sapiens TBC1 domain family, member 10C (TBC1D10C), transcript variant 1, mRNA [NM_198517]	GGAAGGGGTTGGCTGAGTCAAGGGACCCCAGAGGGCACCAGGAATAAAATCTTCTTGAAC
A_33_P3278560	1.7514465	up	ZIK1	Homo sapiens zinc finger protein interacting with K protein 1 (ZIK1), mRNA [NM_001010879]	AACAAATGTGGGAATTCCTTTAGCCAATGCTCCAGCCTCATACATCACCAAAAATGTCAT
A_19_P00317731	1.7377442	up		PREDICTED: Homo sapiens uncharacterized LOC101927887 (LOC101927887), misc_RNA [XR_241392]	AGCTGTCCTGGGTGTTTAGCAGTTATTCGCACAGCTTTCCAAAGACTCACAGCATTTAAA
A_23_P12199	2.3998082	up	FAM46B	Homo sapiens family with sequence similarity 46, member B (FAM46B), mRNA [NM_052943]	TTTCCTTCAGGAGACAAAGCAAGTTTGGGGTGGTAGCCTTAATGCCCAGCACCTTGGATT
A_23_P142974	2.6737027	up	ARHGAP25	Homo sapiens Rho GTPase activating protein 25 (ARHGAP25), transcript variant 1, mRNA [NM_001007231]	CATCTCTGAGACACAGGGGCAGAAAATGACATTCATCTTTTGAGTCCTCATCCATGGAGT
A_23_P50786	1.8785151	up	CLIP3	Homo sapiens CAP-GLY domain containing linker protein 3 (CLIP3), transcript variant 2, mRNA [NM_015526]	GAGGGGATCTCAAATCCTGGAACCCCGATTTCAATCTACGTTCTAGTCACTGGCCTCAAA
A_23_P398854	4.113424	up	DOK7	Homo sapiens docking protein 7 (DOK7), transcript variant 1, mRNA [NM_173660]	TGTCAGCTGTTTCTAAACCCAGACACTGTTTGTAATAGACTGGAAATAAAATGTTCTTTC
A_33_P3354464	1.5308803	up	LOXL1	Homo sapiens lysyl oxidase-like 1 (LOXL1), mRNA [NM_005576]	TGAGATGCAACATTCACTACACAGGTCGCTACGTTTCTGCAACAAACTGCAAAATTGTCC
A_32_P68050	1.5874785	up	NEK1	Homo sapiens NIMA-related kinase 1 (NEK1), transcript variant 2, mRNA [NM_012224]	AAGATGGAGTCTCGAGTACTGTGGACCAACTTAGTGACATTCATATAGAGCCTGGAACCA
A_23_P20122	1.5498084	up	ZC3HAV1	Homo sapiens zinc finger CCCH-type, antiviral 1 (ZC3HAV1), transcript variant 2, mRNA [NM_024625]	GGATTGATGCAGTACACCTAAGGAATAATCATATATACTGGGTTTTTGTTTTGCTGTGGA
A_24_P126425	1.7746893	up	FAM188B	Homo sapiens family with sequence similarity 188, member B (FAM188B), mRNA [NM_032222]	TGCAGACAGCATCAAAACCAATTGACCTCTCAGTAGCAAAGGAAATAAAGACCCTTCTGT
A_23_P399078	1.8797947	up	TIMP3	Homo sapiens TIMP metallopeptidase inhibitor 3 (TIMP3), mRNA [NM_000362]	CAAGATGGCACCCAAGTGTTTGGCTTCTGGCTACCTAAGGTTAACATGTCACTAGAGTAT
A_33_P3258627	1.6999673	up			TGCCTAAGAGAAAATTCTTCCTAAGGCTAAGATTGTTAAATAAAGGAACTGGTCCACCCA
A_23_P76488	1.625549	up	EMP1	Homo sapiens epithelial membrane protein 1 (EMP1), mRNA [NM_001423]	CATGTAATTTGCATTACTCTGGTGGATTGTTCTAGTACTGTATTGGGCTTCTTCGTTAAT
A_24_P207139	1.8197567	up	PML	Homo sapiens promyelocytic leukemia (PML), transcript variant 1, mRNA [NM_033238]	ACAGTGAATTTTGATGCATTTAAAATAAGATTCTGATGCCAGACTGTTAAAACAGGCGCT
A_23_P251499	1.78629	up	PCOLCE	Homo sapiens procollagen C-endopeptidase enhancer (PCOLCE), mRNA [NM_002593]	CTCGTCCAGTTCGTCTCAGATCTCAGTGTCACCGCTGATGGCTTCTCAGCCTCCTACAAG
A_23_P152655	2.480482	up	ICAM2	Homo sapiens intercellular adhesion molecule 2 (ICAM2), transcript variant 5, mRNA [NM_000873]	CTGTGACAGGCAGCAGAGACTTGGGACATTGCCTTTTCTAGCCCGAATACAAACACCTGG
A_33_P3233608	2.838014	up	SPANXB2	Homo sapiens SPANX family, member B2 (SPANXB2), mRNA [NM_145664]	ATACTAGTGGTTCGCTACAGGAGGAACGTGAAAAGAACATCTCCAGAGGAACTGGTGAAT
A_33_P3320772	1.7985182	up	ATXN1	Homo sapiens ataxin 1 (ATXN1), transcript variant 1, mRNA [NM_000332]	AATTCCTCAGGAGGTTAAGATTTGCATTGAAGGCCGGTCTAATGTAGGCAAGTAGAGGCA
A_23_P170733	1.6763794	up	ANTXR2	Homo sapiens anthrax toxin receptor 2 (ANTXR2), transcript variant 1, mRNA [NM_058172]	TTGGTGTCCAGGTTTGTGGCACTGTTCCAAGAGGCCTTACACACACACACAAATATACAA
A_23_P208400	1.5091168	up	ADCK4	Homo sapiens aarF domain containing kinase 4 (ADCK4), transcript variant 1, mRNA [NM_024876]	GGTGCAAGCCGGGAGTTTGGGACAGAGTTCACAGACCATTACATCGAGGTGGTGAAGGCT
A_23_P2041	2.0645368	up	MICALCL	Homo sapiens MICAL C-terminal like (MICALCL), mRNA [NM_032867]	AGCAAATAACTCATATAGCAGGTGTTAATTCAATCCAGGGTGAATTTAATTTACCAGGTG
A_23_P4714	2.2113907	up	MIA	Homo sapiens melanoma inhibitory activity (MIA), transcript variant 1, mRNA [NM_006533]	CTGGCAAAGTCGATGTGAAGACAGACAAATGGGATTTCTACTGCCAGTGAGCTCAGCCTA
A_23_P89780	2.4183483	up	LAMA3	Homo sapiens laminin, alpha 3 (LAMA3), transcript variant 1, mRNA [NM_198129]	TCTAATTTTGAATTCTGACCATGGATACCCATCACTTTGGCATTCAGTGCTACATGTGTA
A_23_P342138	1.8661932	up	ADAMTSL1	Homo sapiens ADAMTS-like 1 (ADAMTSL1), transcript variant 4, mRNA [NM_001040272]	GTTGGGTCTCCTTCTTCTTCACCACAAAAACAGGCTCTAAGAAATCATGTTACTAAAAAA
A_24_P140608	1.7434272	up	HBEGF	Homo sapiens heparin-binding EGF-like growth factor (HBEGF), mRNA [NM_001945]	CCCATCTGTAGTAATTTATTGTCTGTCTACATTTCTGCAGATCTTCCGTGGTCAGAGTGC
A_32_P192376	2.6172183	up	ENPP1	Homo sapiens ectonucleotide pyrophosphatase/phosphodiesterase 1 (ENPP1), mRNA [NM_006208]	CCATCATAGGAATGGGCATTTGAACTTTGAAACTGAATGTGGTGATTACACTTCATGCTG
A_33_P3300312	3.110661	up	DMBT1	Homo sapiens deleted in malignant brain tumors 1 (DMBT1), transcript variant 2, mRNA [NM_007329]	AGGACCCATTGTCCTGGATGATGTGCGCTGCTCAGGACATGAGTCCTATCTGTGGAGCTG
A_23_P110699	1.9479905	up	ZNF300	Homo sapiens zinc finger protein 300 (ZNF300), transcript variant 2, mRNA [NM_052860]	CAGATTCAGTAAAGTTGATCTGTATGCATTTTCCCATCTCAAGCATATAAGTTGACCTGC
A_19_P00320570	2.2676194	up	XLOC_004620	BROAD Institute lincRNA (XLOC_004620), lincRNA [TCONS_00010154]	TGAAGTCATAAATGACTAGAGGGAGCTGGAGTGTGAGGGTCCAGAAACTTGTATGATCCA
A_23_P201778	1.5953729	up	PTPN7	Homo sapiens protein tyrosine phosphatase, non-receptor type 7 (PTPN7), transcript variant 2, mRNA [NM_080588]	TCACTCAGGACTTCTCTCCTGAAGAACACGCAGTGCTAAAACTGAGGATGATTTCCCTAA
A_24_P21831	1.5374674	up	ZNF26	Homo sapiens zinc finger protein 26 (ZNF26), transcript variant 2, mRNA [NM_019591]	CTCTGAATGTGGGAAATCCTTCTGTTGGAATTCAGGGCTTCGTATACATCGGAAGACTCA
A_23_P338479	2.6845515	up	CD274	Homo sapiens CD274 molecule (CD274), transcript variant 1, mRNA [NM_014143]	GAGTTTTTCCTATTTATTTTGAGTCTGTGAGGTCTTCTTGTCATGTGAGTGTGGTTGTGA
A_33_P3269636	4.99087	up	SBSN	Homo sapiens suprabasin (SBSN), transcript variant 1, mRNA [NM_001166034]	GACAGGTTTCTGAAATCCCTGAAGGGGGTTGTACTGGGATTTGTGAATAAACTTGATACA
A_23_P167096	1.7023873	up	VEGFC	Homo sapiens vascular endothelial growth factor C (VEGFC), mRNA [NM_005429]	TTTCTGCCAATGACCAAACAGCCAAGATTTTCCTCTTGTGATTTCTTTAAAAGAATGACT
A_23_P161698	3.8295834	up	MMP3	Homo sapiens matrix metallopeptidase 3 (stromelysin 1, progelatinase) (MMP3), mRNA [NM_002422]	TGACTCGAGTCACACTCAAGGGAACTTGAGCGTGAATCTGTATCTTGCCGGTCATTTTTA
A_33_P3307113	1.9063401	up	MSMP	Homo sapiens microseminoprotein, prostate associated (MSMP), mRNA [NM_001044264]	TCCAGGGAAACCACTAGCAGCTGCCAATGTATTCTGAACAAATAAATTAATGCTATAGCT
A_33_P3310649	1.8458716	up		PREDICTED: Homo sapiens uncharacterized LOC101927887 (LOC101927887), misc_RNA [XR_241392]	AATGCGTTTGACTTGAGCATATTGATTTCAGGCAGGTGAGAGTGGATGTAGCGATTCAGC
A_19_P00812033	1.5307868	up			CTCAGAGGAGGAGTATTCCACCAAAGAAGAGAAATATGAAAAGGAGATGAAACTGCTGGA
A_23_P67127	1.8596293	up	TMEM145	Homo sapiens transmembrane protein 145 (TMEM145), mRNA [NM_173633]	CTTCCCTCGGGTCCCTGGCAGAAAGACATTTTACCCCTTCTTGCCAAAATAAAAAAGGAT
A_23_P96158	2.052652	up	KRT17	Homo sapiens keratin 17 (KRT17), mRNA [NM_000422]	CTGGCCCAGCTTCGCTGCGAGATGGAGCAGCAGAACCAGGAATACAAAATCCTGCTGGAT
A_23_P16022	1.7275586	up	ZNF256	Homo sapiens zinc finger protein 256 (ZNF256), mRNA [NM_005773]	GGATAAAGGTTAGGTAACACACATAGGGCTGTTACGGACTGAGAAGTGTCCCTGCAAAAT
A_24_P251969	1.8305871	up	FGF1	Homo sapiens fibroblast growth factor 1 (acidic) (FGF1), transcript variant 1, mRNA [NM_000800]	AGACCATTTGTATTACCATTACTTGTATAAATACACTTCCTGCTTAAACTTGACCCAGGT
A_19_P00319027	2.791739	up	RFX8	RFX family member 8, lacking RFX DNA binding domain [Source:HGNC Symbol;Acc:37253] [ENST00000484091]	GAAAAGCTCTTTCTTCTATGCCCAGTATTGCTACCTGATAGGTGAAAAAAGGTATCACAG
A_33_P3415820	2.5598755	up	THBS1	Homo sapiens thrombospondin 1 (THBS1), mRNA [NM_003246]	AAGTTCCAAGACCTGGTGGATGCTGTGCGGGCAGAAAAGGGTTTCCTCCTTCTGGCATCC
A_33_P3281695	2.1696796	up	NLRP3	Homo sapiens NLR family, pyrin domain containing 3 (NLRP3), transcript variant 6, mRNA [NM_001243133]	TTAGAAACACTTCAAGAAGAAAAGCCTGAGCTGACCGTCGTCTTTGAGCCTTCTTGGTAG
A_32_P75792	1.708605	up	FAM132A	Homo sapiens family with sequence similarity 132, member A (FAM132A), mRNA [NM_001014980]	AGCTGCAGGCTGGACAGTACGCTTCTGTGTTTGTGGACAATGGCTCCGGGGCCGTCCTCA
A_23_P386268	2.8189669	up	C4orf26	Homo sapiens chromosome 4 open reading frame 26 (C4orf26), transcript variant 2, mRNA [NM_178497]	AAGGCCCAGAATCCATTTTAGGTTTCCAAACAGACCTTTCGTCCCTTCAAGGTGTAACCA
A_23_P39237	1.6330961	up	ZFP36	Homo sapiens ZFP36 ring finger protein (ZFP36), mRNA [NM_003407]	GGTGCTCAAATTACCCTCCAAAAGCAAGTAGCCAAAGCCGTTGCCAAACCCCACCCATAA
A_33_P3243887	2.365261	up	IL11	Homo sapiens interleukin 11 (IL11), transcript variant 1, mRNA [NM_000641]	GTGTATGATTGTCTGTATTTTACAGAATTTCTGCCATGACTGTGTATTTTGCATGACACA
A_19_P00321206	1.7566026	up		PREDICTED: Homo sapiens uncharacterized LOC101059946 (LOC101059946), misc_RNA [XR_171346]	TGGAAAGCTGTGCGAATAACTGCTAAACACCCAGGACAGCTTATGCATTTTTTGAAAAAG
A_23_P121011	1.7789286	up	CSRNP1	Homo sapiens cysteine-serine-rich nuclear protein 1 (CSRNP1), mRNA [NM_033027]	GCGTGATGTTCCTTAGCCCAAAGACGGTGAGACAGGGCTGAAATCAGGTGGCTTCTGCCA
A_23_P13772	1.9332433	up	TBX3	Homo sapiens T-box 3 (TBX3), transcript variant 2, mRNA [NM_016569]	AGAGCATCCAGCGGTTGGTTAGCGGCTTGGAAGCCAAGCCGGACAGGTCCCGCAGCGCGT
A_23_P53193	2.1107368	up	SYTL2	Homo sapiens synaptotagmin-like 2 (SYTL2), transcript variant c, mRNA [NM_206927]	GCACCTAAGGAATACTACACAGCATGTAAAAGTCAATCTGCATGTGCTTCTTTGATTACA
A_23_P145874	1.78957	up	SAMD9L	Homo sapiens sterile alpha motif domain containing 9-like (SAMD9L), mRNA [NM_152703]	CATTGATATCCACTGGTCACATCATAACTGTCTATAGGGCAATAAAATCTGTGTTAAACT
A_23_P137504	1.8170248	up	ZBTB37	Homo sapiens zinc finger and BTB domain containing 37 (ZBTB37), transcript variant 2, mRNA [NM_032522]	ATTGATACCACAGGCCATGGTTCTGTAGGACAGGAAAATTATACTTTAGGGTCTTCAGGA
A_19_P00811951	2.2857928	up			GAATCACTAACTCCAAGGCATCCAGTCACTCAGCATAGGCCGGGCCCTGTCTTCTCTGAC
A_24_P203000	1.7456397	up	IL2RB	Homo sapiens interleukin 2 receptor, beta (IL2RB), mRNA [NM_000878]	TTGAGGTTGTCTGAGTCTTGGGTCTATGCCTTGAAAAAAGCTGAATTATTGGACAGTCTC
A_32_P44394	2.9798784	up	AIM2	Homo sapiens absent in melanoma 2 (AIM2), mRNA [NM_004833]	GAAGGAGATAAGGTTCGACTTACATTCTTCACACTGTCAAAAAATGGAGAAAAACTACAG
A_24_P318656	1.7970845	up	ITGB3	Homo sapiens integrin, beta 3 (platelet glycoprotein IIIa, antigen CD61) (ITGB3), mRNA [NM_000212]	ATGTGTGGACACATTGGACCTTTCCTGAGGAAGAGGGACTGTTCTTTTGTCCCAGAAAAG
A_23_P128919	1.7816468	up	LGALS3	Homo sapiens lectin, galactoside-binding, soluble, 3 (LGALS3), transcript variant 1, mRNA [NM_002306]	GGAAACCATTCAAAATACAAGTACTGGTTGAACCTGACCACTTCAAGGTTGCAGTGAATG
A_23_P337753	1.9833949	up	SP140L	Homo sapiens SP140 nuclear body protein-like (SP140L), mRNA [NM_138402]	AGGATTTCAAGGAAGTGTTTGCTATTCAGGAAACAAATGGGAACAGTTGACTGGTTTAGT
A_33_P3268304	1.8320354	up	LIMS2	Homo sapiens LIM and senescent cell antigen-like domains 2 (LIMS2), transcript variant 5, mRNA [NM_001161404]	CCAGCGCAGACCTGGTGTTTGTTTGTTGGGCTCACGCTTGCACAATGAAGGCTTGTTCAC
A_23_P66881	1.5182728	up	RGS9	Homo sapiens regulator of G-protein signaling 9 (RGS9), transcript variant 1, mRNA [NM_003835]	ACACACTTGCTCGAGAACCAAAGTGCATTTGGGTGACATTTGAAGATTGGGGAGACAAGA
A_23_P67618	2.4416575	up	ZNF792	Homo sapiens zinc finger protein 792 (ZNF792), mRNA [NM_175872]	CAGGATTCAGGGTTTGCAGAAATTCTCAGGACCTCAGACCTCTGTCCTATGACTAATGTT
A_23_P304489	1.8191293	up	FAM19A5	Homo sapiens family with sequence similarity 19 (chemokine (C-C motif)-like), member A5 (FAM19A5), transcript variant 2, mRNA [NM_015381]	TAGATCAACTTGACCGTACTAAAATCCCTTTCTGTTTTAACCAGTTAAACATGCCTCTTC
A_24_P279489	2.1918757	up	VPS53	Homo sapiens vacuolar protein sorting 53 homolog (S. cerevisiae) (VPS53), transcript variant 1, mRNA [NM_001128159]	TTAGGTCATGACTGTAATATCAAGCTTACACGAGAGTTTTAAAAGACTGAGCAGTATCCC
A_33_P3230698	2.621183	up	KIF1A	Homo sapiens kinesin family member 1A (KIF1A), transcript variant 1, mRNA [NM_001244008]	ACTGTGCGTGCACTTGAGGCTCTGTCCAATTAAGAAATAAATGTGGCTCTTACTCAACAC
A_23_P86731	1.5393018	up	ZNF239	Homo sapiens zinc finger protein 239 (ZNF239), transcript variant 1, mRNA [NM_005674]	ATGCTGTACAATGAATGGATTGTTCTTGTTTCTCAGATGGGTAGAGTAAAAGTGTCTGTA
A_23_P307310	1.5284357	up	ACAN	Homo sapiens aggrecan (ACAN), transcript variant 2, mRNA [NM_013227]	CATCCCACCCAGACGGTGTCCTCTTCTTGTCGCTTTTTGTCATATAAGGAATCCCATTAA
A_33_P3380252	2.592591	up			ATTAGGTTGAAGGTGGGATTCTCTCTGGAATAAGTTGTTCCCAAAATTCATGTGTATTTC
A_23_P44112	2.506766	up	LAT	Homo sapiens linker for activation of T cells (LAT), transcript variant 1, mRNA [NM_014387]	CCTACTCTGTGTAATAGAATAAAGGCCTGCGTGTGTCTGTGTTGAGCGTGCGTCTGTGTG
A_33_P3361758	2.3193932	up	FAM227B	Homo sapiens family with sequence similarity 227, member B (FAM227B), mRNA [NM_152647]	AAAGGCTACCAAGAAACCTCATGAAGTGAAACAGGACTTTGAGAAGTTCCTACATAAACT
A_33_P3393460	3.8036034	up	C2orf90	PREDICTED: Homo sapiens chromosome 2 open reading frame 90 (C2orf90), misc_RNA [XR_249068]	GGAATTTGTTGCCTTGCAAGGCAATGTATCTACTTGCTATATAGTTTTCTAATGCAAATC
A_24_P305784	2.4145243	up	SPANXB2	Homo sapiens SPANX family, member B2 (SPANXB2), mRNA [NM_145664]	AACCCCGACCAAATGGAGGAGGAGGAATTCATAGAAATAACGACTGAAAGACCTAAAAAG
A_23_P218770	1.7965299	up	RAC2	Homo sapiens ras-related C3 botulinum toxin substrate 2 (rho family, small GTP binding protein Rac2) (RAC2), mRNA [NM_002872]	ATATCTGCTCAGCCAATGGAAAATCTGGGTTCAACCAGCCCCTGCCATTTCTTAAGACTT
A_23_P62752	2.3887086	up	NPPB	Homo sapiens natriuretic peptide B (NPPB), mRNA [NM_002521]	CTGCTTCTGATTCCACAAGGGGCTTTTTCCTCAACCCTGTGGCCGCCTTTGAAGTGACTC
A_23_P431388	4.2974086	up	SPOCD1	Homo sapiens SPOC domain containing 1 (SPOCD1), transcript variant 1, mRNA [NM_144569]	TGTTTGAACTTCCTGTTTGACAATGTTTGCTGTTGATTTTTTGTTCAATAAAGAATTTGG
A_19_P00803333	1.6222585	up	ZSWIM6	Homo sapiens zinc finger, SWIM-type containing 6 (ZSWIM6), mRNA [NM_020928]	TTTGGCGGCAACAAGGCACTGCAATGACTGACAAATACAGGCAGCTCTGGGATGAGCTGG
A_33_P3342081	2.319738	up	PRDM1	Homo sapiens PR domain containing 1, with ZNF domain (PRDM1), transcript variant 1, mRNA [NM_001198]	CCTCTACTCAAAGTTAAAACTGACCAAAGTTACTGGCTTTTTACTTTGCTAGAACAACAA
A_33_P3312246	1.7500039	up	PHIP	Homo sapiens pleckstrin homology domain interacting protein (PHIP), mRNA [NM_017934]	TACACAAGAAAAGGGGTAGAAAGCCCAAAAAGCTACAGTATGCAAAGCCAGAAGATTTAG
A_19_P00321872	1.5903417	up	LINC00958	Homo sapiens long intergenic non-protein coding RNA 958 (LINC00958), long non-coding RNA [NR_038904]	ATTTCTACAAATATTTCGACATCTCCATATACTCACTCCTTTCCCCCCTGAGTGGAGAGA
A_23_P132889	1.52708	up	CRMP1	Homo sapiens collapsin response mediator protein 1 (CRMP1), transcript variant 1, mRNA [NM_001014809]	GTACTAGTGTGGTGTGTTTGCTTGGAAATTCCTTGCCCCACAGTTGTGTTCATGCTGAAT
A_23_P89884	1.7257224	up	TRIM28	Homo sapiens tripartite motif containing 28 (TRIM28), mRNA [NM_005762]	AGTTTGCCCAGGATGTGGGCCGCATGTTCAAGCAATTCAACAAGTTAACTGAGGACAAGG
A_23_P154962	2.893109	up	RIMBP3	Homo sapiens RIMS binding protein 3 (RIMBP3), mRNA [NM_015672]	TTGCTGATAACTATGGCAGGTATACGGAGAAGCGCCTTTTTCTGTGGCCAATGTGTGTTT
A_24_P142118	2.055666	up	THBS1	Homo sapiens thrombospondin 1 (THBS1), mRNA [NM_003246]	AATAAGCTGCTCTGCCCCTTGTGCTCAGAGTGGATGTTATGGGATTCCTTTTTTCTCTGT
A_33_P3344831	1.7658509	up	TMEM45A	Homo sapiens transmembrane protein 45A (TMEM45A), mRNA [NM_018004]	CTACTATTTGTAACTCCTTGACCATGGAATTATACTTGTTTATCTTGTTGCTGCAATGAG
A_23_P148541	5.2393007	up	CTAG1A	Homo sapiens cancer/testis antigen 1A (CTAG1A), mRNA [NM_139250]	TGATTGTTTGTCGCTGGAGGAGGACGGCTTACATGTTTGTTTCTGTAGAAAATAAAACTG
A_33_P3857239	1.7902433	up	KRT42P	Homo sapiens keratin 42 pseudogene (KRT42P), non-coding RNA [NR_033415]	CAACCTGGAGATGCAGCCTGAGAACCTCAAGGAGGACCTGGTCTACCTGAAGAAGAACCA
A_23_P86330	1.7837979	up	IER5	Homo sapiens immediate early response 5 (IER5), mRNA [NM_016545]	ATGGTGACTCCAGTCTTTGTTGTATAAAGGTTGGGGGAGCTGATAAGGTTTTTGTACAGT
A_33_P3385775	1.9139268	up	ZNF703	Homo sapiens zinc finger protein 703 (ZNF703), mRNA [NM_025069]	TTTATTTACTATAATGTTAGCTTACAAGCTGGGAATATAAGTGCATTAACGGCCCACATG
A_23_P353014	5.316965	up	CACNA2D4	Homo sapiens calcium channel, voltage-dependent, alpha 2/delta subunit 4 (CACNA2D4), mRNA [NM_172364]	TAGGCTGAGACATCCAATTGCTGCATGGAAATTGATGTACATTCAGGGGACGGCAAAAAT
A_24_P228717	1.6770169	up	RAC2	Homo sapiens ras-related C3 botulinum toxin substrate 2 (rho family, small GTP binding protein Rac2) (RAC2), mRNA [NM_002872]	CAAGGAGATTGACTCGGTGAAATACCTGGAGTGCTCAGCTCTCACCCAGAGAGGCCTGAA
A_24_P915692	1.6700675	up	PHLDA1	Homo sapiens pleckstrin homology-like domain, family A, member 1 (PHLDA1), mRNA [NM_007350]	TACAGGATCTAAAAGGGTTTTCTTAGAAAGGGCAATATTGTCCAATGAAGTAAGCAGAAG
A_33_P3264846	2.2203972	up	SAMD9L	Homo sapiens sterile alpha motif domain containing 9-like (SAMD9L), mRNA [NM_152703]	ATACCAGTAATATCTGTTTATTCAGGTCCACTCAGAAGTGGTAGGAACATAGAAAGAGTG
A_33_P3286859	1.5148243	up	ATP8A2	Homo sapiens ATPase, aminophospholipid transporter, class I, type 8A, member 2 (ATP8A2), mRNA [NM_016529]	AGTCAGGAAGAAGTCATCCGTGCTTATGACACCACCAAAAAGAAATCCAGGAAGAAATAA
A_23_P90333	3.2086816	up	ZNF404	Homo sapiens zinc finger protein 404 (ZNF404), mRNA [NM_001033719]	GTAAAGAATGTGATAAGGCCTTTAATCGCAGTGATCGACTTACTCAACATGAGACAATTC
A_24_P72364	5.340757	up	C6orf15	Homo sapiens chromosome 6 open reading frame 15 (C6orf15), mRNA [NM_014070]	TACCAGCTGGGGAAATATTAATCGGTATCCAGGAGGCAGCTGGGGAAATATTAATCGGTA
A_24_P259607	1.5216881	up	SUSD4	Homo sapiens sushi domain containing 4 (SUSD4), transcript variant 1, mRNA [NM_017982]	CATCTCATGATGGAGACAGTAACCAAGGTAATGTTTTGTTTCAGCATTTTAAAAAGACTC
A_32_P105549	2.4025433	up	ANXA8L2	Homo sapiens annexin A8-like 2 (ANXA8L2), mRNA [NM_001630]	GGCAACTGAGACTGGGTACCTGGAGATTCTGAAGTGCCTTTGCTGTGGTTTTCAAAATAA
A_23_P9883	2.1850817	up	NLRP3	Homo sapiens NLR family, pyrin domain containing 3 (NLRP3), transcript variant 3, mRNA [NM_001079821]	TGTTGTTGTCATCACAGCGCCTCAGTTAGAGGATGTTCCTCTGGTGACCTCATGTAATTA
A_23_P47579	2.050345	up	NLRP14	Homo sapiens NLR family, pyrin domain containing 14 (NLRP14), mRNA [NM_176822]	ATGTTGTCTGGATCTGGCTTCTGTTATTTTGAATAACCCAAACCTGAGGAGCCTGGACCT
A_32_P40288	1.8409227	up	TMEM200A	Homo sapiens transmembrane protein 200A (TMEM200A), transcript variant 4, mRNA [NM_052913]	CAATCGGCTAACCTTGACATTTCTTTTTACCTTCATATGCCACTATCTCGGTAGTTCAAA
A_33_P3418527	9.4897175	up	OR10A6	Homo sapiens olfactory receptor, family 10, subfamily A, member 6 (OR10A6), mRNA [NM_001004461]	TTGTCTTACTCACTTCTGACACCACTGCTGAATCTGCTTATCTACAGTTTGCGAAATAGT
A_33_P3259403	2.4216533	up	PAN3	Homo sapiens PAN3 poly(A) specific ribonuclease subunit homolog (S. cerevisiae) (PAN3), mRNA [NM_175854]	TACTTTTCAAGAACTGATTGCAGCTGCAAATGGTCAGTTGTAGTATTTGCTAAAAAAGCA
A_23_P426472	2.0274093	up	ZNF45	Homo sapiens zinc finger protein 45 (ZNF45), mRNA [NM_003425]	AGCTGATACATGCAGACAAGAGGATCAGGAAGGATGAGTCTGATCTGGAGTAAATCAGAA
A_33_P3235321	1.6983467	up	SYTL1	Homo sapiens synaptotagmin-like 1 (SYTL1), transcript variant 2, mRNA [NM_032872]	CAAGCGCAAGACGGCGGTGAAGAAACGGAATCTGAATCCGGTTTTCAACGAGACTCTCCG
A_32_P174572	1.7767152	up	HTR7P1	Homo sapiens 5-hydroxytryptamine (serotonin) receptor 7 pseudogene 1 (HTR7P1), non-coding RNA [NR_002774]	GCAAGCTGTCCTCTCAGGATAAAGTGGAATTTCGACATGGATTATGGACTTCTTCCAACT
A_19_P00318539	1.606951	up	XLOC_009378	BROAD Institute lincRNA (XLOC_009378), lincRNA [TCONS_00019580]	GCAAAGGTTTTCAGTCCTAGTCCATCATGACCACATAGCTGGAATACACTTATTTCACTT
A_33_P3335966	1.5256357	up	TPM1	Homo sapiens tropomyosin 1 (alpha) (TPM1), transcript variant 1, mRNA [NM_001018005]	CTCGCAGAAGGAAGACAGATATGAGGAAGAGATCAAGGTCCTTTCCGACAAGCTGAAGGA
A_24_P100551	1.8750345	up	SH3RF1	Homo sapiens SH3 domain containing ring finger 1 (SH3RF1), mRNA [NM_020870]	TGGTTTTTTGCAGACAGTAGAGGGAGATTTTGTAACAAGGGCTTGTTACACAGTGATATG
A_23_P90172	1.7209136	up	PPP1R15A	Homo sapiens protein phosphatase 1, regulatory subunit 15A (PPP1R15A), mRNA [NM_014330]	ACCCTGAGACTCCCCTAAAGGCCAGAAAGGTGCGCTTCTCCGAGAAGGTCACTGTCCATT
A_24_P175187	2.5531232	up	SAMD9	Homo sapiens sterile alpha motif domain containing 9 (SAMD9), transcript variant 1, mRNA [NM_017654]	CAACCAGCGATACGTAATCAAAATGTAATTTTCCCCTAATAAAATTATGGATATGGGCAG
A_32_P305888	2.5818267	up	SH3TC2	Homo sapiens SH3 domain and tetratricopeptide repeats 2 (SH3TC2), mRNA [NM_024577]	TAGCCAAACATGATCTAGTTACCCTCTTTATTCTAATTGTTCCCTCAAATCTTATATGGG
A_23_P55616	7.4535465	up	SLC14A1	Homo sapiens solute carrier family 14 (urea transporter), member 1 (SLC14A1), transcript variant 4, mRNA [NM_001146037]	TTCTTGGTGTTTAGCTGGCTCGATGATGTTAACAGTATTAAAAATTAAACCCCATAAACC
A_19_P00321671	1.7376112	up			CAAATTCACATCTTCCCCATGCTTCCAGAGAATGCATATTCTTCCTTTGAAAAAAGAAAA
A_23_P344281	2.5819001	up	ZIK1	Homo sapiens zinc finger protein interacting with K protein 1 (ZIK1), mRNA [NM_001010879]	GCACTGGTCACTCCTATGTGCTAAGACAAGGCAGACATCTGTGTGTTCTCTTAAGTCTTT
A_33_P3250173	3.6817863	up	IQCJ	Homo sapiens IQ motif containing J (IQCJ), transcript variant 1, mRNA [NM_001042705]	CTATTGCTGTTACTGCCTAGACAATTTTCTATCTTCTCATATCTGATCAACTGACTGTCT
A_33_P3235940	2.5668309	up	KLK6	Homo sapiens kallikrein-related peptidase 6 (KLK6), transcript variant B, mRNA [NM_001012964]	GACATACATGGAATAGCACCTGGGCCACCATGCACTCAATAAAGAATGAATTTTATTATG
A_33_P3349774	1.5023782	up	LSM14B	Homo sapiens LSM14B, SCD6 homolog B (S. cerevisiae) (LSM14B), mRNA [NM_144703]	ATCATTTTCCGAGGAAGTGACATCAAGGATATCACTGTGTGTGAACCTCCGAAAGCTCAG
A_23_P364324	2.2882338	up	ABCA13	Homo sapiens ATP-binding cassette, sub-family A (ABC1), member 13 (ABCA13), mRNA [NM_152701]	ACAATCACTGATAGCTTTGTTGTGAGCAATTTTGATTCCCATGTATCACATGAATTACAC
A_24_P235429	2.321298	up	ABCA1	Homo sapiens ATP-binding cassette, sub-family A (ABC1), member 1 (ABCA1), mRNA [NM_005502]	CCAAAGAGCCATGTGTCATGTAATACTGAACCACTTTGATATTGAGACATTAATTTGTAC
A_33_P3360675	1.8521186	up	PRKAR1B	Homo sapiens protein kinase, cAMP-dependent, regulatory, type I, beta (PRKAR1B), transcript variant 1, mRNA [NM_001164761]	AGATGGAGAGAAAATTGTGGTCCAGGGAGAGCCTGGGGACGACTTTTACATCATCACGGA
A_23_P127891	2.9229548	up	BDNF	Homo sapiens brain-derived neurotrophic factor (BDNF), transcript variant 1, mRNA [NM_170735]	AGGTTCAAGAGGCTTGACATCATTGGCTGACACTTTCGAACACGTGATAGAAGAGCTGTT
A_23_P352870	1.564173	up	PVRL2	Homo sapiens poliovirus receptor-related 2 (herpesvirus entry mediator B) (PVRL2), transcript variant alpha, mRNA [NM_002856]	CTCCCAGCTGGTCATCCACGCAGTGGACAGTCTGTTCAATACCACCTTCGTCTGCACAGT
A_23_P417113	1.6820716	up	RBM33	RNA binding motif protein 33 [Source:HGNC Symbol;Acc:27223] [ENST00000287912]	TCAACTTCCTCCATAGTATTGCTGTAATTAATCAAAGTAGGCAAAGAAGGTTGACTAGGT
A_33_P3763412	1.9473288	up		Homo sapiens cDNA FLJ40109 fis, clone TESTI2007685. [AK097428]	ATTCATATTTAGTACCTGTTGGCTTTGCTTCTTAAGATAAATTCCAAATGGGGTTGCTGA
A_33_P3420235	2.4077225	up	ARPC5	actin related protein 2/3 complex, subunit 5, 16kDa [Source:HGNC Symbol;Acc:708] [ENST00000367534]	CACAAGCAACATGGGACACAGCATTCACTTTAACATTTCTATTTTCCTTTATCATTTCTG
A_24_P795371	3.3684213	up	NR2F2-AS1	Homo sapiens NR2F2 antisense RNA 1 (NR2F2-AS1), transcript variant 1, long non-coding RNA [NR_102743]	TTAGACAACACAAACCTAGGAAGGGTTTGAGAGGTGAAACAAACTGGGGTTATGGATGAA
A_23_P121215	1.8923595	up	CAMK1	Homo sapiens calcium/calmodulin-dependent protein kinase I (CAMK1), mRNA [NM_003656]	TGAACAGATTTTGAAGGCCGAGTACGAGTTTGACTCTCCTTACTGGGACGACATCTCTGA
A_33_P3342628	2.398917	up	HES4	Homo sapiens hes family bHLH transcription factor 4 (HES4), transcript variant 2, mRNA [NM_021170]	CCCGTTCTAGGGCCGTGGCCTTTGCCGAGACTGTAGCAGAGAAAACGTATTTATTATTCC
A_23_P144916	1.5645969	up	GFPT2	Homo sapiens glutamine-fructose-6-phosphate transaminase 2 (GFPT2), mRNA [NM_005110]	CATAGTAAAACAGCTTGAAATATCCCATGCAAGAGAGTAGTTTCAAGTGGGCAACTCTGC
A_23_P26994	1.643572	up	GNGT2	Homo sapiens guanine nucleotide binding protein (G protein), gamma transducing activity polypeptide 2 (GNGT2), transcript variant 1, mRNA [NM_031498]	CCTTCTCTTCATCACAGAATGAGTAAAGATCCCTGAACAAATGCATTGTGAACCCATTCC
A_23_P132718	1.6715493	up	SEMA3B	Homo sapiens sema domain, immunoglobulin domain (Ig), short basic domain, secreted, (semaphorin) 3B (SEMA3B), transcript variant 1, mRNA [NM_004636]	TTGGGTAGTGAGCAGTGAGCAGAAAGCTGTGAACAGGCTGGGCTGCTGGAGGTGGGGCGA
A_23_P67339	2.078959	up	RCN3	Homo sapiens reticulocalbin 3, EF-hand calcium binding domain (RCN3), mRNA [NM_020650]	CGACACGGACAAGGATGGGCGGCTGAGCAAAGCGGAAATCCTGGGTAATTGGAACATGTT
A_33_P3296181	3.0555081	up	CCL3L3	Homo sapiens chemokine (C-C motif) ligand 3-like 3 (CCL3L3), mRNA [NM_001001437]	AAGAGTAGTCAGTCCCTTCTTGGCTCTGCTGACACTCGAGCCCACATTCCATCACCTGCT
A_19_P00319028	2.5255184	up	RFX8	Homo sapiens RFX family member 8, lacking RFX DNA binding domain (RFX8), mRNA [NM_001145664]	TGTCTCATGTATGAGATTTACGTGGAGACCTGTGGGCAAAACACTGAGAACCAAGTCAAC
A_33_P3281741	1.5690606	up	RFX8	Homo sapiens RFX family member 8, lacking RFX DNA binding domain (RFX8), mRNA [NM_001145664]	TGGAATCTTCTTCTCACTGCTGTAAGCAAAGCCATGACCCTCTGCCACAGAGATAGTTTT
A_33_P3302025	2.1090243	up	ADAMTSL1	Homo sapiens ADAMTS-like 1 (ADAMTSL1), transcript variant 2, mRNA [NM_052866]	ATCACCAGCTGGGAAGCACCGTCAAGGAAGATAACTGTGGGGTCTGCAACGGAGATGGGT
A_33_P3316273	2.5327308	up	CCL3	Homo sapiens chemokine (C-C motif) ligand 3 (CCL3), mRNA [NM_002983]	TGCTTTTGTTCAGGGCTGTGATCGGCCTGGGGAAATAATAAAGATGCTCTTTTAAAAGGT
A_33_P3431595	2.1731367	up	C8orf31	Homo sapiens chromosome 8 open reading frame 31 (C8orf31), mRNA [NM_173687]	GTCTGTGTGCTAGGGAAGCGATGAACCATACTGTTAGTCTATTAAACGTAACTCAACCTG
A_33_P3345389	1.7336324	up	C20orf194	Homo sapiens chromosome 20 open reading frame 194 (C20orf194), mRNA [NM_001009984]	ATTTACCTTGGTAATCGAGATGTCATGCTAAGGACCAATAAACTATCACTGAACAAGCAA
A_19_P00316655	2.4374015	up			GGAAGGGAGAGAATGTATTGCAGAAATGCAACTTAACTTTTTCCTTTCCAGATGGCATGG
A_33_P3422133	1.5492073	up	ADAP1	Homo sapiens ArfGAP with dual PH domains 1 (ADAP1), transcript variant 1, mRNA [NM_006869]	TATTTATTTTTCACCTATCTCCTTCCTGTCAAGGCAGGCCGGGCTCCAGGGCTCCCCTTG
A_24_P377144	1.6487259	up	ANTXR2	Homo sapiens anthrax toxin receptor 2 (ANTXR2), transcript variant 1, mRNA [NM_058172]	AGAAAGCCAAAAATGCTGTGGTGAAGATTCCTGAAGAAACAGAGGAACCCATCAGGCCTA
A_24_P328504	2.4070058	up	SP140	Homo sapiens SP140 nuclear body protein (SP140), transcript variant 1, mRNA [NM_007237]	ACGGAAAGTGATCAAGCGTGTGGCACAATGGATACTGTGGATATTGCAAACAACTCCACT
A_23_P217341	2.225193	up	MAGEB1	Homo sapiens melanoma antigen family B, 1 (MAGEB1), transcript variant 1, mRNA [NM_002363]	ACACCTACACCCTCGTCAGTAAGCTAAACCTCACCAATGATGGAAACCTGAGCAATGATT
A_24_P709377	2.5174983	up	PAX8-AS1	Homo sapiens PAX8 antisense RNA 1 (PAX8-AS1), transcript variant 1, long non-coding RNA [NR_015377]	GCAAAGAACGCCACAAAACAGTGAGCTCAACTTCTTGAAAGTCATAATGTGTTGCTAAGT
A_33_P3246244	3.891537	up			TATTTGGAAGCAAAATATTTGGCTCCTGACTGAAAGGGTTTTGATCCATGCATACATTAA
A_23_P36795	1.8102894	up	SYT1	Homo sapiens synaptotagmin I (SYT1), transcript variant 1, mRNA [NM_005639]	AAAGTAGCTCTCCATTATCACCTTTATACAAAATGTACATCCTGTGAATTCTGTTCCAGA
A_23_P41470	1.6347106	up	DDX60	Homo sapiens DEAD (Asp-Glu-Ala-Asp) box polypeptide 60 (DDX60), mRNA [NM_017631]	TGTCGCTTAATGCCTATGCACTGGATTTCTACAAACATGGTTCCTTGATAGGATTAGTCC
A_24_P532864	9.360188	up		RST7162 Athersys RAGE Library Homo sapiens cDNA, mRNA sequence [BG188151]	CTGGCACTAAGAAATACAGACACTTGTGATTTACTACTGGGCACTTATAGGAATGGAGTC
A_33_P3381513	2.2376947	up	CD274	Homo sapiens CD274 molecule (CD274), transcript variant 1, mRNA [NM_014143]	CTGGGAGCCATCTTATTATGCCTTGGTGTAGCACTGACATTCATCTTCCGTTTAAGAAAA
A_32_P76627	1.7420111	up		HUMKEREP keratin {Homo sapiens} (exp=-1; wgp=0; cg=0), partial (72%) [THC2531223]	CTCTGGCACACCATGCAGAACCTGGAGATTGAGCTGCAGTCCCAGCTCAGCATGTTAGGA
A_33_P3780572	1.5197097	up	LINC01060	PREDICTED: Homo sapiens uncharacterized LOC401164 (LOC401164), transcript variant X4, misc_RNA [XR_244627]	CACTGATGGTGGGCTTCCAGCCTCCAGAATTGTAAGGCAATAAATTCATGTTGTTTTAAG
A_23_P379071	1.9613605	up	FBXL13	Homo sapiens F-box and leucine-rich repeat protein 13 (FBXL13), transcript variant 1, mRNA [NM_145032]	ATGCCATTACCTGCACATTTTGGATATCTCTGGTTGTGTCTTGCTTACTGACCAAATCCT
A_24_P387437	4.507947	up	CTCFL	Homo sapiens CCCTC-binding factor (zinc finger protein)-like (CTCFL), transcript variant 2, mRNA [NM_080618]	AAATCAGATAAGGCAAATGTGTACCTGTAAGGAATTTGTACTTTTTCATAATGCCCAGTG
A_23_P350451	2.3694942	up	PRDM1	Homo sapiens PR domain containing 1, with ZNF domain (PRDM1), transcript variant 1, mRNA [NM_001198]	ATGACATCAGTGTGATCTCTGTAGTGGAGAAGGAAATTCTGGCCGTGGTCAGAAAAGAGA
A_23_P16469	1.6471775	up	PLAUR	Homo sapiens plasminogen activator, urokinase receptor (PLAUR), transcript variant 3, mRNA [NM_001005377]	ACAGGACCCTGAGCTATCGGACTGGCTTGAAGATCACCAGCCTTACCGAGGTTGTGTGTG
A_33_P3359704	1.6354291	up	ZNF703	Homo sapiens zinc finger protein 703 (ZNF703), mRNA [NM_025069]	TACTATTCGCCATACGCGCTGTATGGACAGAGACTAGCTTCAGCCTCGGCGCTGGGATAC
A_24_P356509	1.7532943	up	RAD51D	Homo sapiens RAD51 paralog D (RAD51D), transcript variant 6, mRNA [NM_001142571]	TGATGCTGACGTAAATAATACATGGCAAATCTAGTCCTTTATGCAGAAATTCATTGCTGG
A_19_P00318537	1.6311796	up	XLOC_009378	BROAD Institute lincRNA (XLOC_009378), lincRNA [TCONS_00019580]	TATCTGCTTTCCAAAAACATGGAGCTAAGATCCCAGCACTGAGAAGATGGGCATTCCTAG
A_24_P210829	1.5090293	up	NME4	Homo sapiens NME/NM23 nucleoside diphosphate kinase 4 (NME4), transcript variant 1, mRNA [NM_005009]	TGAGGCTGCCCCAGGAACCATAAGGGGTGACTTCAGCGTCCACATCAGCAGGAATGTCAT
A_23_P14564	7.473623	up	GPR65	Homo sapiens G protein-coupled receptor 65 (GPR65), mRNA [NM_003608]	AACAAGTTTAAATTGTGTTGCTGATCCAATTCTGTACTGTTTTGTAACCGAAACAGGAAG
A_23_P24555	1.5269426	up	PHLDB1	Homo sapiens pleckstrin homology-like domain, family B, member 1 (PHLDB1), transcript variant 1, mRNA [NM_015157]	CAACTGGGGCTTTTGTATAAGAAGACTTTAATATTCTGTAAGGAGCTTGGTCCTGTGAGT
A_23_P210425	2.5515537	up	MYL9	Homo sapiens myosin, light chain 9, regulatory (MYL9), transcript variant 2, mRNA [NM_181526]	TGAGGAAGTGGACGAGATGTACCGGGAGGCACCCATTGATAAGAAAGGCAACTTCAACTA
A_33_P3285299	6.195867	up	GPRIN2	Homo sapiens G protein regulated inducer of neurite outgrowth 2 (GPRIN2), mRNA [NM_014696]	GCTTTAGCACTGTGCAGAGGGGAGATCCTGAGTTTTCTGTAAAAAATGACCTTTTGTTCA
A_23_P71316	3.8947554	up	RBPMS	Homo sapiens RNA binding protein with multiple splicing (RBPMS), transcript variant 3, mRNA [NM_001008712]	GAGGGTTCTCTTATAAAGCTCACATCTAAACAGCCTGTAGGTTTTGTCAGTTTTGACAGT
A_19_P00316901	4.726025	up	RFX8	RFX family member 8, lacking RFX DNA binding domain [Source:HGNC Symbol;Acc:37253] [ENST00000492238]	TATGTACCTATGTTGTAGTCATTGAGTTCTGGAAGGTGAGATCGATATTCAGTGTAATCA
A_33_P3391915	2.316292	up	BTBD17	Homo sapiens BTB (POZ) domain containing 17 (BTBD17), mRNA [NM_001080466]	TCACAGCTGACTTGAAGGAACGTTCTTGGTCCTGAATAAACCGATGCTCAGAGTGGTAAA
A_23_P209726	1.7214918	up	SP140	Homo sapiens SP140 nuclear body protein (SP140), transcript variant 1, mRNA [NM_007237]	AGGGGCTTTTCTCTGAGCCTCCTTCATCTGCCCAAAGACAAATCCTCAAAAGGAAATTCA
A_19_P00811234	2.1411605	up			CTACAGGTTTAAGGGCTTAAATCTCAACCTTTGTGTTAGGAGTAACAGGAGTGTGCTGAG
A_32_P32413	1.8793858	up	SETBP1	Homo sapiens SET binding protein 1 (SETBP1), transcript variant 1, mRNA [NM_015559]	TGGACTTGCTGTTATTTGAGGCGTAGATACATCTAGCATGCTTACTGTCATGCTCCTCCA
A_23_P63209	3.491665	up	HSD11B1	Homo sapiens hydroxysteroid (11-beta) dehydrogenase 1 (HSD11B1), transcript variant 2, mRNA [NM_181755]	TGGGACTGTTCTGTCTCATGTTTATCTGAGCTCTTATCTATGAAGACATCTTCCCAGAGT
A_33_P3252286	1.534245	up	CRLF1	Homo sapiens cytokine receptor-like factor 1 (CRLF1), mRNA [NM_004750]	TCCCCATTACCTAGGGCCCCTCCAAAAGAGTCCTTTTAAATAAATGAGCTATTTAGGTGC
A_23_P401380	1.6107271	up	DIP2B	Homo sapiens DIP2 disco-interacting protein 2 homolog B (Drosophila) (DIP2B), mRNA [NM_173602]	GGCCAAATAAATTACTTTCCTTGAATATCCAGGAATCTTTTAGTCTAAAGCAATGAGGAG
A_33_P3402526	1.5306772	up	CSGALNACT2	Homo sapiens chondroitin sulfate N-acetylgalactosaminyltransferase 2 (CSGALNACT2), mRNA [NM_018590]	GAAATAGAGACGCATCTTCATAAACAGGCATACAGGACAAACAGCGAAGCTGTTGGTTGA
A_32_P162250	1.8991956	up	ARHGAP18	Homo sapiens Rho GTPase activating protein 18 (ARHGAP18), mRNA [NM_033515]	AAGTCCTGAATAAGTCTACTGGAAGAATTATTCTTCTGGGTGAAAAAGCTTTTGTTTGTG
A_33_P3385671	3.0058138	up			TAACTTGCTTTTAAACCCCTTGAAAATACCGCTGCAGTGTGGCTTTCTCTGCTCCATTGC
A_33_P3265129	1.9617792	up		Uncharacterized protein; cDNA FLJ34659 fis, clone KIDNE2018863 [Source:UniProtKB/TrEMBL;Acc:Q8NAW3] [ENST00000593357]	ACAGCTTGGAAGCTGAAGACCCAGGAAAGCCAATGTGTATATCCAGTCTTAGTCTGAAGA
A_23_P57910	2.5267067	up	RTP3	Homo sapiens receptor (chemosensory) transporter protein 3 (RTP3), mRNA [NM_031440]	TCCTACGCATGCCAAAACCACATCTGTAGGAACTTAAGCATTTTCTGCTGTTGTGTCATT
A_33_P3400319	3.0802188	up		Uncharacterized protein [Source:UniProtKB/TrEMBL;Acc:H7C4H0] [ENST00000383686]	TCTGAAAAGAAGTGTGAAATCATCAAAAGAGCCATTGGAGGGGACACCAGAGAGTCGTGT
A_19_P00320294	2.642826	up			TTAAGAATTTCCCTAGAGGGTCGGGTATCATCTCAGCCAGATCTTTCTCATCCTTCAAGG
A_19_P00318769	3.561249	up	RFX8	Homo sapiens RFX family member 8, lacking RFX DNA binding domain (RFX8), mRNA [NM_001145664]	CATGACTTCTTGGAAGATGTTTCTATTCAGTACCTGAAATCTGTGCAGTTATTTAGTAAG
A_19_P00805678	2.4733846	up			TGTCCAGAGTTCCATTAAAGTGGTGTGTGTTCTCTTTGCCTTTGTGAGTAGACTTCTGAT
A_33_P3319940	2.291773	up	ATRX	Homo sapiens alpha thalassemia/mental retardation syndrome X-linked (ATRX), transcript variant 1, mRNA [NM_000489]	GACAACAGGTCAATCATTTTCAAAAAGATTCCATTTATAGACACCCTTCATTGCAAGTTC
A_33_P3228985	2.8984363	up	ZNF705B	Homo sapiens zinc finger protein 705B (ZNF705B), mRNA [NM_001193630]	TGTGGAAAATCCCTTCGTAATCTTTTGTCCCCTAAACCACGTAAACAAATTCATACTAAA
A_33_P3350247	3.3591032	up			TTTTTCTCTTCTCAGGATTCTAGTCACAGTTAACAGGGATCCCTATCAAGAGCCACCCCA
A_23_P79108	3.3940294	up	ATP8B3	Homo sapiens ATPase, aminophospholipid transporter, class I, type 8B, member 3 (ATP8B3), transcript variant 1, mRNA [NM_138813]	TCTAAAGACAAGGACTCCACATGCTTTTCTTTTTCTAATAAACCAGGGTCCATCTGACCC
A_19_P00319730	4.094444	up			GTCCACTCCAGATGGTCCTCAGGGAAAGAACTTTCTCCACACGGTCATGTGAGCAGGCTC
A_33_P3285420	2.706476	up	LINC01020	Homo sapiens long intergenic non-protein coding RNA 1020 (LINC01020), long non-coding RNA [NR_026994]	CTCAGTGTAGCCAAAGATTCCTTGCCTACAAGAAAGTCTTGCTCAGACAATAAACCACGG
A_33_P3312187	1.5324618	up			TCTTTAGCACACCTAGCGACACGGTCACAATCACATGGTCCGCCGGGATCAGCTCACAGT
A_19_P00330702	2.9883015	up			GGGATAGACATCATGATAAAAACTCAACTTGCTCTTTCTATGTGGCCATTCTCAATGCAC
A_33_P3374553	4.636539	up			ACAAAGAATGACGCCCAGTTTCTAAGAGTCATTCCGTGCTTTACAATCAGCCCACAACCA
A_19_P00321005	3.6583772	up		Human autonomously replicating sequence (ARS); O-family homologous repeat region mRNA. [L08443]	TTGGAAGGTTCTCCTCCATCTTCAGATGACATAAACATACACCTATTTGGCCTTTTGAAA
A_19_P00332128	2.2223363	up			ACATTGGTGGTCCAGCCCAGCCACAGTGGAAAGAGCTCGTTAACGTCTTATTAACATCTC
A_33_P3266091	2.436513	up			AAGTCAGACTCCGGAGCTGTGCAGTGCAGCCCTGGCTACAGAAAGCTGCTTCGTCTGAAT

## Sheet: FC > 1.5 D shRNA Ki-67 vs CTRL
ProbeName	FC ([shRNA Ki-67] vs [shRNA CTRL])	Regulation ([shRNA Ki-67] vs [shRNA CTRL])	GeneSymbol	Description	Sequence
A_23_P137543	-2.219584	down	ZNF362	Homo sapiens zinc finger protein 362 (ZNF362), mRNA [NM_152493]	ACTCCCTGTAAATACGCTGTTATACATACTGTTAACACCCCTTTGCTTTTTCTATGGGAC
A_23_P101392	-1.6125014	down	TMEM38A	Homo sapiens transmembrane protein 38A (TMEM38A), mRNA [NM_024074]	TTCACAGAATCCTGGCAGCAGCTCCAGTCAAGAATGTCACTGGTTGGCATGATATTCTTA
A_24_P303080	-1.7875336	down	MFSD8	Homo sapiens major facilitator superfamily domain containing 8 (MFSD8), mRNA [NM_152778]	AGCCCACTGACTGGAGCTTTTGTCTTAGCATAATAACCTGTTTCCAGCAAGAATATAACA
A_33_P3525263	-3.8337784	down	A2ML1	Homo sapiens alpha-2-macroglobulin-like 1 (A2ML1), transcript variant 1, mRNA [NM_144670]	AAAGTGTGCTGGTCACCAACTTGAAACCAGCAACCATCAAGGTCTATGACTACTACCTAC
A_23_P203920	-2.8107107	down	SSPN	Homo sapiens sarcospan (SSPN), transcript variant 1, mRNA [NM_005086]	AATGTTTTGATTTGCTTTAAAAATGGCCTTCCTACACATTAGCTCCAGCTAAAAAGACAC
A_19_P00331796	-4.5363574	down			ATGAAGGAGATCATCAGCAATCAAGGTCAAATTTGTACCCCCTGGCAACTACCTTCCTGA
A_33_P3351264	-4.8682747	down	OVOL3	Homo sapiens ovo-like zinc finger 3 (OVOL3), mRNA [NM_001270948]	TGTTGTGGCAAGGGCTTTCATGACGCCTTCGATCTCAAGCGCCACATGAGGACTCACACT
A_33_P3352467	-2.8211935	down	SSTR2	Homo sapiens somatostatin receptor 2 (SSTR2), mRNA [NM_001050]	AAGGGGACTTTAGAGGACTTCATACAAAGCTGGGCATTAAGAAAACCACAATGCATGGCC
A_23_P44857	-4.904235	down		T cell receptor alpha variable 26-1 [Source:HGNC Symbol;Acc:12123] [ENST00000390455]	ATCATTCATGGTCTAAAAAACAATGAAACCAATGAAATGGCCTCTCTGATCATCACAGAA
A_32_P405902	-3.6280699	down	C21orf15	Homo sapiens chromosome 21 open reading frame 15 (C21orf15), long non-coding RNA [NR_026755]	TTCATGTGATAAAATGAAACAATTGCTCACACTGATCTCCTGGGATCTCTACTAAGATGT
A_33_P3704738	-2.986648	down	FAM74A1	Homo sapiens family with sequence similarity 74, member A1 (FAM74A1), long non-coding RNA [NR_026803]	AGAAACTCAGAGACTGTCCCGGAGAAGACATGGAAACAGCTCAGACGCTGTCTGCAAGAA
A_33_P3794109	-1.9726774	down	LOC253805	Homo sapiens hypothetical protein LOC253805, mRNA (cDNA clone IMAGE:4824622). [BC028622]	CTTTTTAGGCCTCTTCTCAGCACACTGTTCCAACCAAAATTGATCTAATAAACGTATTTA
A_33_P3380383	-2.6981933	down	TIFAB	Homo sapiens TRAF-interacting protein with forkhead-associated domain, family member B (TIFAB), mRNA [NM_001099221]	AACAATTACATTTGTGGTAGCTTGGGGTTACCTTCAGCTTTCAAATACCCACAGGCACGC
A_33_P3273457	-3.0486667	down	SPATA21	spermatogenesis associated 21 [Source:HGNC Symbol;Acc:28026] [ENST00000375577]	AGACTCAGAGATGCATTTGAGAAGGGGCCTTCAGAGCTCAGAATCCAGGAGCAGGGGCCT
A_24_P50801	-1.8247569	down	NRP2	Homo sapiens neuropilin 2 (NRP2), transcript variant 6, mRNA [NM_201264]	AGCCCGGTGAGGAGTGGCTTCAGGTAGATCTGGGAACACCCAAGACAGTGAAAGGTGTCA
A_24_P280846	-2.3447666	down	GOLT1A	Homo sapiens golgi transport 1A (GOLT1A), mRNA [NM_198447]	CTCGGCATGTTCCTGGAAACCTACGGATTCTTCAGCCTCTTTAAGGGCTTTTTCCCTGTC
A_33_P3398406	-4.06032	down	GLP2R	Homo sapiens glucagon-like peptide 2 receptor (GLP2R), mRNA [NM_004246]	AACAAATGGGAATAAGAAAATCTGGTGGATCATCCGAGGACCCATGATGCTCTGTGTAAC
A_19_P00332432	-4.046001	down		602285130F1 NIH_MGC_86 Homo sapiens cDNA clone IMAGE:4372734 5', mRNA sequence [BG112755]	GCTACCTGTTAAAATTCACCCTGTACTCTTGAAAGCAAACGTGCATCTAAATAAACTAAA
A_33_P3537861	-3.0802736	down	LOC100126448	Homo sapiens isolate HA_003373 chromosome X unknown mRNA. [EF565113]	GGGGCCAAAAACTTAGGCATAAATAGTGTTTTCCATTACTTCAAAATACCATCAATCACA
A_33_P3281985	-3.404183	down	CR2	Homo sapiens complement component (3d/Epstein Barr virus) receptor 2 (CR2), transcript variant 1, mRNA [NM_001006658]	GTACAATTCAGGCTTTGGATGTTTCTTTAGCAGTTTTGTGATAAGTTCTAGTTGCTTGTA
A_33_P3214570	-2.0468714	down	XLOC_014512	BROAD Institute lincRNA (XLOC_014512), lincRNA [TCONS_l2_00020436]	AACCTGACACAATGGAGTCACAAAAAGCATGTGTCAAATGAATGAATAAAGAATCAGCAC
A_23_P171095	-2.0665793	down	USP27X	Homo sapiens ubiquitin specific peptidase 27, X-linked (USP27X), mRNA [NM_001145073]	CTGTTTTCATTTCAAACGGTTTGAACATTCAGCGAAACAGAGGCGCAAGATCACTACATA
A_23_P30315	-2.427807	down	TRIM7	Homo sapiens tripartite motif containing 7 (TRIM7), transcript variant 6, mRNA [NM_033342]	CGTAACATACCAGTTAGGGCCTGCGGAAGCATCTTGTAATGGAACACATTACTATTTCTG
A_33_P3346826	-2.9707968	down	IL32	Homo sapiens interleukin 32 (IL32), transcript variant 4, mRNA [NM_001012633]	AGAAAGAGATGGATTACGGTGCCGAGGCAACAGATCCCCTGTCCCGGATGTTGAGGATCC
A_19_P00315502	-1.656396	down		RASH_MSVHA (P01115) Transforming protein p29 precursor [Contains: Transforming protein p21], partial (6%) [THC2657193]	AGCCGGGATCGGGTTGTTGTTAATTTCTTAAGCAATTTCTAAATTCTGTATTGACTCTCT
A_33_P3349506	-4.736576	down		PREDICTED: Homo sapiens ovostatin 2 (OVOS2), transcript variant X2, misc_RNA [XR_253040]	ATGAAGCAAGTTTTTCTAAGACCCTCTCAAGGAAAAATTCAAAGGCCAAGCTTGCCCCGG
A_33_P3329013	-2.0739934	down	SSTR2	Homo sapiens somatostatin receptor 2 (SSTR2), mRNA [NM_001050]	CAAAGTCTGGAGAAGAGGGATCATGCCTGGATATGATCTTTAGAAACAACAAAAATAGAA
A_23_P104318	-2.999295	down	DDIT4	Homo sapiens DNA-damage-inducible transcript 4 (DDIT4), mRNA [NM_019058]	TCGTGGAGGTGGTTTGTGTATCTTACTGGTCTGAAGGGACCAAGTGTGTTTGTTGTTTGT
A_33_P3289296	-2.119076	down	TMEM37	Homo sapiens transmembrane protein 37 (TMEM37), mRNA [NM_183240]	AGCACGTCTGTACTTCTGTTCATTAAAGTGCTCCCTTTCTAGTCCTTTTTCTGCCCAGAA
A_23_P123393	-1.5135726	down	KCNQ3	Homo sapiens potassium voltage-gated channel, KQT-like subfamily, member 3 (KCNQ3), transcript variant 1, mRNA [NM_004519]	CTTCCAATAAGCCCATTTAAAAGAGGTCACTGGCTGACCCCTCCTTGTAATGTAGACAGA
A_23_P205428	-5.250477	down	FOXG1	Homo sapiens forkhead box G1 (FOXG1), mRNA [NM_005249]	TTAACGATTGCCTTCAGTTTGTGTTGTGTATATTTTGATGTATGTGGTCACTAACAGGTC
A_23_P1833	-2.9207556	down	B3GAT1	Homo sapiens beta-1,3-glucuronyltransferase 1 (glucuronosyltransferase P) (B3GAT1), transcript variant 2, mRNA [NM_054025]	ACTTCTTTGGGCAGATGCTAGGTCAGTTGTTTTCACCTAATATCCTCTTTTAGCTGCATG
A_33_P3343066	-2.5806215	down	PAX2	Homo sapiens paired box 2 (PAX2), transcript variant c, mRNA [NM_003988]	CCACTTTCAGTGCGTCGGTTCGTTTTGATTCTTTTTCTTTTGTGCACATAAGAAATAAAT
A_23_P117506	-1.7117878	down	DHRS7	Homo sapiens dehydrogenase/reductase (SDR family) member 7 (DHRS7), mRNA [NM_016029]	CTGGAGAAGTCACAAAGACTATAGGCAATAATGGAGACCAGTCCCACAAGATGACAACCA
A_33_P3227472	-1.6913245	down	SDSL	Homo sapiens serine dehydratase-like (SDSL), mRNA [NM_138432]	CTCCTGGACTGCTTCTTTTGGCTCTCCGACAACTCCGGCCAATAAACACTTTCTGAATTG
A_33_P3299525	-1.9446139	down	KCTD21	Homo sapiens potassium channel tetramerization domain containing 21 (KCTD21), mRNA [NM_001029859]	CTCACAGGGCTGTTGTGAGGATCAAATGAAATAATGTAACGTGAGAATACAGTATAAATG
A_23_P160214	-2.07207	down	TTC39A	Homo sapiens tetratricopeptide repeat domain 39A (TTC39A), transcript variant 2, mRNA [NM_001080494]	AGAGAATGTATGAACAGTTTACATTTTCCTTAGAAATACATTGATGGGATCACAGTTGGC
A_19_P00805898	-3.3244586	down			TCAAATGGGAGTTCCAAGACCAGAGGAAACCTAGCCCAGAGCTTGAGTCTTCCAGGCTAA
A_24_P481824	-2.2436924	down	DPY19L4	Homo sapiens dpy-19-like 4 (C. elegans) (DPY19L4), mRNA [NM_181787]	GGAATATATATGACAATTATTTTCTGTACATTAATGTCTAAACATTATACTTACTTTTTC
A_33_P3421913	-1.7018743	down	CADM1	Homo sapiens cell adhesion molecule 1 (CADM1), transcript variant 1, mRNA [NM_014333]	GTAAGAAACTCCATATCCATATGTTCCCATTCGCATTTTGTATTGGTTCATGTATACCAT
A_33_P3351207	-1.6350172	down	MGC21881	Homo sapiens uncharacterized locus MGC21881 (MGC21881), long non-coding RNA [NR_015363]	CCCATTTTCTCACTTCCTGTTTGTGTGTCAAGGGGTATTAATAAATCTTTGCCTATTTAA
A_23_P115726	-2.0491872	down	SLC16A9	Homo sapiens solute carrier family 16, member 9 (SLC16A9), mRNA [NM_194298]	GGGATTTTATAAACCAATAGCCAAGTGTTCTTTAAATAGGAGGCACCCTTCCCATTGTGC
A_24_P245838	-3.5037606	down	MGAT3	Homo sapiens mannosyl (beta-1,4-)-glycoprotein beta-1,4-N-acetylglucosaminyltransferase (MGAT3), transcript variant 1, mRNA [NM_002409]	ACATTCTGAAATCATTTTCTCTGTAAATGGTTGGATTTCATTTCACCCTTAAAGGGATGC
A_23_P56759	-2.6944735	down	KRCC1	Homo sapiens lysine-rich coiled-coil 1 (KRCC1), mRNA [NM_016618]	GATATCCGTGTTCATACCACTTTTCTTATGTGAATAGGTTCTTTAACTTCTAACAAAGGC
A_19_P00323375	-1.899209	down	TTC28-AS1	Homo sapiens TTC28 antisense RNA 1 (TTC28-AS1), transcript variant 2, long non-coding RNA [NR_026962]	CCATGTTGATTATATGCACTTGGAATATTTCTTTTCCATCTGTGGATTGTTCTGTCACTT
A_32_P130788	-2.9711168	down	SAMD13	Homo sapiens sterile alpha motif domain containing 13 (SAMD13), transcript variant 1, mRNA [NM_001010971]	TAATTTGTTTCTGAAGAAATTTGCCGAGAGTTACAGGTCAAAAAGCCTTGTTACTAGTAC
A_23_P40059	-1.5199295	down	PMS1	Homo sapiens PMS1 postmeiotic segregation increased 1 (S. cerevisiae) (PMS1), transcript variant 1, mRNA [NM_000534]	GATCCTCGTCTTACAGCGAATGGTTTCAAGATAAAATTGATACCAGGAGTTTCAATTACT
A_33_P3384932	-1.6324304	down	NUDT8	Homo sapiens nudix (nucleoside diphosphate linked moiety X)-type motif 8 (NUDT8), transcript variant 1, mRNA [NM_001243750]	TGGCTTCACCCTGTCAGGCCAGCTCCACTCCAGGACTGAATAAAGGTCTTTGACAGCTCT
A_23_P387585	-1.568642	down	FAM226A	Homo sapiens family with sequence similarity 226, member A (non-protein coding) (FAM226A), long non-coding RNA [NR_026595]	TATAAAAAGATAAAATAAAAAGCCGGTCAGTGTCTGTTGCACAAAATTACAACCGCTCTC
A_33_P3252794	-1.5015112	down	GLI4	Homo sapiens GLI family zinc finger 4 (GLI4), mRNA [NM_138465]	GGTGGGCACTGCCCAGCACCGCATGCCACGTGTCCGGAATAAATTCTTTTTGATTGTTGG
A_33_P3347971	-1.621209	down	TPD52	Homo sapiens tumor protein D52 (TPD52), transcript variant 1, mRNA [NM_001025252]	GGTCTGCAAGTGCTTTTGCCTGCCAGGATTTTGTACTCAAATAAATGCTATTTGGCAACT
A_23_P200710	-2.0656886	down	PIK3C2B	Homo sapiens phosphatidylinositol-4-phosphate 3-kinase, catalytic subunit type 2 beta (PIK3C2B), mRNA [NM_002646]	CGGTGAAACTTTTCCAGATGAACGGACCATAAATGTGTTACTGGCTTTGTGCCTGTAGCT
A_23_P65230	-2.323532	down	TMTC4	Homo sapiens transmembrane and tetratricopeptide repeat containing 4 (TMTC4), transcript variant 1, mRNA [NM_032813]	AGAGGGCAACACATCTGTGTAAGCTGCTTTTTAGTGTGTTTATCTGAAGGCCGTTTTCCA
A_23_P81898	-4.0251026	down	UBD	Homo sapiens ubiquitin D (UBD), mRNA [NM_006398]	ATTTGGGTGGGATGGGTAGGATGAAGTATATTGCCCAACTCTATGTTTCTTTGATTCTAA
A_23_P79962	-1.7103773	down	MKKS	Homo sapiens McKusick-Kaufman syndrome (MKKS), transcript variant 2, mRNA [NM_170784]	ACTGGCCAGATTTGCTTTCACAGTGTGGCTGTGGATTATACAATAGCCAGGAAGAACTCA
A_23_P69293	-2.2597117	down	CHDH	Homo sapiens choline dehydrogenase (CHDH), mRNA [NM_018397]	TGCCGCATCCTTTTTCTTGTGTTCACGTGGCATTCTCTAACCCAGGGCAGTGGTTCCTTC
A_23_P78980	-2.0143497	down	B3GNT3	Homo sapiens UDP-GlcNAc:betaGal beta-1,3-N-acetylglucosaminyltransferase 3 (B3GNT3), mRNA [NM_014256]	CCAGTCAAGCTTCACAGGCATTGTGATGGGGCAGCCTTGGGGAATATAAAATTTTGTGAA
A_23_P210330	-1.5964236	down	LGALSL	Homo sapiens lectin, galactoside-binding-like (LGALSL), mRNA [NM_014181]	AGGGAGCCCTGTTTGCCTTGAGATAAACGGCCTTGGCATTTTCTGGCATTAATGTAGAAA
A_23_P121702	-1.6150146	down	OCIAD2	Homo sapiens OCIA domain containing 2 (OCIAD2), transcript variant 1, mRNA [NM_001014446]	AGACTCTCAGCCTTCAGCTTCCTAAATTCTGTGTCTGTGACTTTCGAAGTTTTTTAAACC
A_33_P3242623	-1.8446392	down	SLC7A11	Homo sapiens solute carrier family 7 (anionic amino acid transporter light chain, xc- system), member 11 (SLC7A11), mRNA [NM_014331]	GAAGTAAGTGTGTTTGTTTTCATCTTATGGAAACTCTTGATGCATGTGCTTTTGTATGGA
A_23_P116173	-1.9642245	down	COLCA2	Homo sapiens colorectal cancer associated 2 (COLCA2), transcript variant 3, mRNA [NM_001136105]	CACAGTTTACATGTCACTATTTCCAATTTTCTGATGCTAAGCATTCATATGAAGTCCTCA
A_24_P325520	-1.5101572	down	SORT1	Homo sapiens sortilin 1 (SORT1), transcript variant 1, mRNA [NM_002959]	CACGAAAGTGTAAAGCAGTATTAAGATCATTACTGCATGTGCCCTAAAAACCCAAGTTTT
A_23_P252062	-1.8245496	down	PPARG	Homo sapiens peroxisome proliferator-activated receptor gamma (PPARG), transcript variant 3, mRNA [NM_138711]	CCAAGGCTTCATGACAAGGGAGTTTCTAAAGAGCCTGCGAAAGCCTTTTGGTGACTTTAT
A_33_P3283480	-1.6009616	down	CTSC	Homo sapiens cathepsin C (CTSC), transcript variant 2, mRNA [NM_148170]	GGATCAACTCCATCTTACTAACCATTTGATTCCCTATGTATTACACGATATATGACCAAT
A_23_P162322	-1.6581371	down	WNT10B	Homo sapiens wingless-type MMTV integration site family, member 10B (WNT10B), mRNA [NM_003394]	TTTGGAGCCATAAGATCTGTATCTAGAAAGAGATCACCCACTCCTATGTACTATCCCCAA
A_33_P3312499	-2.7391677	down	MS4A15	Homo sapiens membrane-spanning 4-domains, subfamily A, member 15 (MS4A15), transcript variant 1, mRNA [NM_001098835]	AGATGAGATGGCTTGTCTCATCCACACCACAGAAGGAAATAAACCATGTGGCTTAAATTT
A_23_P329573	-2.797311	down	ITGB2	Homo sapiens integrin, beta 2 (complement component 3 receptor 3 and 4 subunit) (ITGB2), transcript variant 1, mRNA [NM_000211]	GCCAATTTATTTACATTTAAACTTGTCAGGGTATAAAATGACATCCCATTAATTATATTG
A_23_P19624	-1.5325716	down	BMP6	Homo sapiens bone morphogenetic protein 6 (BMP6), mRNA [NM_001718]	TGGTTCTCTGCCTTTTTACTATACAGCATACCACGCCACAGGGTTAGAACCAACGAAGAA
A_23_P256724	-2.0697103	down	TNFRSF10C	Homo sapiens tumor necrosis factor receptor superfamily, member 10c, decoy without an intracellular domain (TNFRSF10C), mRNA [NM_003841]	ACCTCTCATGCACCATCGTAGGGATCATAGTTCTAATTGTGCTTCTGATTGTGTTTGTTT
A_23_P19987	-2.5984867	down	IGF2BP3	Homo sapiens insulin-like growth factor 2 mRNA binding protein 3 (IGF2BP3), mRNA [NM_006547]	AACAAAAGGCTACATTTCCATGGGGCCAGCACTGTCATGAGCCTCACTAAGCTATTTTGA
A_24_P281009	-2.5881565	down	AQP7P1	Homo sapiens aquaporin 7 pseudogene 1 (AQP7P1), non-coding RNA [NR_002817]	CACTGGTGATAGGCATCCTCGTGGTCATCATCAGGGTGTACCATGGCATGAACACAGGAT
A_23_P15146	-3.2371712	down	IL32	Homo sapiens interleukin 32 (IL32), transcript variant 1, mRNA [NM_001012631]	GGAGGAGCTGACACCCCAGAAGTGCTCTGAACCCCAATCCTCAAAATGAAGATACTGACA
A_23_P55682	-1.7035079	down	ZSCAN18	Homo sapiens zinc finger and SCAN domain containing 18 (ZSCAN18), transcript variant 3, mRNA [NM_023926]	GCAAGTGGTCACCAGCATTACACAGCAATGAAGCAGAATAAAGTAGGCCAGAATGCATCA
A_23_P85180	-1.7632678	down	TMEM187	Homo sapiens transmembrane protein 187 (TMEM187), mRNA [NM_003492]	ACTTTTCTGTAGTTTGAAATGTTTCCAAATAAATATTGGCAAGGGGAGTGGAAATGACAC
A_33_P3241428	-1.8208636	down	OBSL1	Homo sapiens obscurin-like 1 (OBSL1), transcript variant 1, mRNA [NM_015311]	ACAGCTTGGAAGGCGTTTGCCCTTACCCTGGGCAGGGGTAGAGAGACAAGGAACAATAAA
A_33_P3295458	-1.9662223	down	LINC00634	Homo sapiens long intergenic non-protein coding RNA 634 (LINC00634), long non-coding RNA [NR_024355]	CTGGGGCTTCCATCTTAATTTATTCTCAATAATAAAGACTTCATGATGATCTCTGCAGGA
A_33_P3364884	-2.6023283	down	PDHB	Homo sapiens pyruvate dehydrogenase (lipoamide) beta (PDHB), transcript variant 1, mRNA [NM_000925]	GTATGGATGTGGCAGAGTCCTCATGAAAGATGTATCCAAACAAGATAACTTATATGTATA
A_23_P41804	-2.148107	down	NKD2	Homo sapiens naked cuticle homolog 2 (Drosophila) (NKD2), transcript variant 1, mRNA [NM_033120]	TGAACACATCTGAAGCCACTATGTTTCCTGGCTCTAAGGCTCGTCTGTGTAACCCATAAA
A_24_P270728	-2.1007097	down	NUPR1	Homo sapiens nuclear protein, transcriptional regulator, 1 (NUPR1), transcript variant 1, mRNA [NM_001042483]	TATTCCCGCTGACTGAGTCTCTGAGGGGCTACCAGGAAAGCGCCTCCAACCCTAGCAAAA
A_33_P3343120	-1.8787327	down	IRF8	Homo sapiens interferon regulatory factor 8 (IRF8), mRNA [NM_002163]	GCTGAAGTGTTCATAAGATAACAATAGGCTTGAATCTCCAATTCAAATGAATGTCAAAGC
A_33_P3261902	-1.7859302	down	ENOSF1	Homo sapiens enolase superfamily member 1 (ENOSF1), transcript variant 2, mRNA [NM_001126123]	TAAAAAATCCTACCGATCAAGATGAGTTCAGCTAGAAGTCATACCACCCTCAGGAATCAG
A_23_P392126	-2.224993	down	LYRM9	Homo sapiens LYR motif containing 9 (LYRM9), mRNA [NM_001076680]	GTTTGTTTGTATCCTTGCAGTTATGTGACTTAAAGTGACTCAGAGATATCTATGTATGCG
A_23_P166663	-1.7120911	down	APPL1	Homo sapiens adaptor protein, phosphotyrosine interaction, PH domain and leucine zipper containing 1 (APPL1), mRNA [NM_012096]	CCTCAGGCTCTACAATCTAGGGGTGGTAAATGTGTTTCCACTATACTTGGGAAAAGGTCA
A_33_P3308347	-5.025914	down	ADAMTS8	Homo sapiens ADAM metallopeptidase with thrombospondin type 1 motif, 8 (ADAMTS8), mRNA [NM_007037]	GTGGATCCATTTCAAGTATTTATGCAAATGTGTCTCTGAACTAAAGTGTGATCTTATGCC
A_23_P143047	-1.6701176	down	ATP6V1E2	Homo sapiens ATPase, H+ transporting, lysosomal 31kDa, V1 subunit E2 (ATP6V1E2), mRNA [NM_080653]	ACCAACAGAAAGTTCTTTATATAAGCCTCTGGGAAGTGAAGCTAGTGTTGAACCACTAAA
A_23_P253932	-1.5470213	down	FAIM	Homo sapiens Fas apoptotic inhibitory molecule (FAIM), transcript variant 1, mRNA [NM_001033030]	GGGAACCATGACTGTTACATAAAGGCTGTCAGTAGTGGGAAGCGGAAAGAAGGGATTATT
A_23_P321307	-1.9950867	down	ADAMTS2	Homo sapiens ADAM metallopeptidase with thrombospondin type 1 motif, 2 (ADAMTS2), transcript variant 2, mRNA [NM_021599]	GAACATTGTCAATGAAATCTACCATGACGAGTCCTTGGGTGCCCACATCAACGTGGTCCT
A_23_P158041	-3.08832	down	AQP7	Homo sapiens aquaporin 7 (AQP7), mRNA [NM_001170]	GCAGAGGAAGATGGTGCGAGAGTTCCTGGCCGAGTTCATGAGCACATATGTCATGATGGT
A_23_P162746	-1.968719	down	CRYL1	Homo sapiens crystallin, lambda 1 (CRYL1), mRNA [NM_015974]	TACTCTGGGGCCCTGCATTTATGAGGCACCTACCTTCATTTTGCTAACGCTTATTCTGAA
A_23_P216712	-3.2298026	down	TRPM6	Homo sapiens transient receptor potential cation channel, subfamily M, member 6 (TRPM6), transcript variant a, mRNA [NM_017662]	TGCCCAATTGCCAAACTAAAGACATCAGTTCATTGGTCAAATATTTGTTACCTGGAATGG
A_23_P93641	-2.8236425	down	AKR1B10	Homo sapiens aldo-keto reductase family 1, member B10 (aldose reductase) (AKR1B10), mRNA [NM_020299]	ATCACAGTGAACTTAGTCCTGTTATAGACGAGAATCGAGGTGCTGTTTTAGACATTTATT
A_33_P3286146	-3.9855258	down	LOC100132891	Homo sapiens uncharacterized LOC100132891 (LOC100132891), transcript variant 1, long non-coding RNA [NR_033652]	GGGGCTTCACAAGCTTGTAAATGTTTTTTAAAATCAGAGACTGTTATAAGTTTGCCCATT
A_32_P515431	-3.6959343	down	LOC101930067	PREDICTED: Homo sapiens uncharacterized LOC101930067 (LOC101930067), misc_RNA [XR_250705]	CAAGATTAAGTTAGAATAACACTGCTGTAGACTGTTTATCAGCTCTTCAGCATATGTCCA
A_33_P3395472	-5.7218018	down			TAAAACGGCTCTGCATTAGTAACACTTTCCAATCACAAGGAATGTATTTTCATTGGTGTC
A_32_P78681	-2.1183586	down	GLP2R	glucagon-like peptide 2 receptor [Source:HGNC Symbol;Acc:4325] [ENST00000262441]	CCCTCACTCCACAAATGGGGTGATCAACACTTACTGCTTGCTCTTGTTCTGCTAATGATT
A_23_P50081	-2.011337	down	IMPA2	Homo sapiens inositol(myo)-1(or 4)-monophosphatase 2 (IMPA2), mRNA [NM_014214]	TAGCTGTTTCTCTCTTTAATCTCACGTAGCCTTTTTCAGGTTAGTACGTGTTCTTCTGTC
A_23_P117782	-1.533089	down	LARP6	Homo sapiens La ribonucleoprotein domain family, member 6 (LARP6), transcript variant 1, mRNA [NM_018357]	GCAAGTAGCTAAGCCTATAGCATGGTGTCTTGTAGGACCAAATCGATGTTACCTGTCAAG
A_33_P3333282	-2.7306795	down	FGF11	Homo sapiens fibroblast growth factor 11 (FGF11), mRNA [NM_004112]	TTAGGTACCCAAAAAGGGCCTGTCTAGATTTTTTCAGAAAAACGTGGAGTGCTAGGGGCA
A_32_P189781	-2.5269854	down	LINC00520	Homo sapiens long intergenic non-protein coding RNA 520 (LINC00520), transcript variant 1, long non-coding RNA [NR_026796]	TCCTTTTGAATCATAAGCACTTTTGTTAAATACCTCAAATCTTTCGAGAACAGCAAGGAG
A_23_P99747	-1.6461186	down	CDKL1	Homo sapiens cyclin-dependent kinase-like 1 (CDC2-related kinase) (CDKL1), transcript variant 1, mRNA [NM_004196]	GATCTCATTCCTAGGCACCAGCAAGTGTTTAGCACGAATCAGTACTTCAGTGGAGTGAAA
A_24_P396720	-1.7293322	down	PPP1CB	Homo sapiens protein phosphatase 1, catalytic subunit, beta isozyme (PPP1CB), transcript variant 1, mRNA [NM_002709]	TTTCTTCAACCACTACCTTCTACATTGGTTGACTTAGACCGTAAGCTTTTTAAGTTTCTC
A_23_P405885	-7.001856	down	DPPA2	Homo sapiens developmental pluripotency associated 2 (DPPA2), mRNA [NM_138815]	CTAAAGAATCCCTTTCTGTATGTCTGAAAACCCATTAAAATAAAGTCACTGCAATTGGCA
A_32_P33083	-2.1584265	down	VCX2	Homo sapiens variable charge, X-linked 2 (VCX2), mRNA [NM_016378]	AAGAACCACTGAGTCAGGAGAGCGAGGTGGAAGAACCACTGACTGTGTGGATGGCCAGCT
A_33_P3726064	-1.5848286	down	SPATA3-AS1	Homo sapiens SPATA3 antisense RNA 1 (head to head) (SPATA3-AS1), long non-coding RNA [NR_033879]	GGGTCTTTGACCTTATTTGGAAAAAGCGTCTTTACAAATGTAAGTGACCTTATTTGGAAA
A_33_P3319785	-2.0420222	down			TGCCAGACTGTCCAGTATGGTGTTCAGTATGTCCAGTGAATAAAGAGATGAACAAACAGA
A_33_P3276693	-1.9155383	down	PGF	Homo sapiens placental growth factor (PGF), transcript variant 1, mRNA [NM_002632]	TCCCTGCAGGGCCATCTGACTGCCAAGCCAGATTCTCTTGAATAAAGTATTCTAGTGTGG
A_24_P346855	-3.22642	down	MKI67	Homo sapiens marker of proliferation Ki-67 (MKI67), transcript variant 1, mRNA [NM_002417]	TCTCACCCTGGTAAGTACAGTATTTCAAGAGCACGCTAAGGGTGGTTTTCATTTTACAGG
A_23_P207461	-2.7024896	down	CA10	Homo sapiens carbonic anhydrase X (CA10), transcript variant 2, mRNA [NM_020178]	CACAAAGTACAAAACGAATGCCTTTCTTTTCTTGTTTATAATGGTCACTCACTGTGTTTG
A_23_P15272	-1.6623229	down	ABCC6	Homo sapiens ATP-binding cassette, sub-family C (CFTR/MRP), member 6 (ABCC6), transcript variant 2, mRNA [NM_001079528]	GTTCCCCCACTGGCTGTATTATAGGACAATTTTTATATGTGATATGTATTTACCTTAGTG
A_33_P3420976	-2.321776	down	FAM159B	Homo sapiens family with sequence similarity 159, member B (FAM159B), mRNA [NM_001164442]	TCTGTGTTTTAAATGCTTACTGGAGAGATGGGACAATAAAAATAAAGCGTGCACTTGAAA
A_23_P165061	-1.6338303	down	AES	Homo sapiens amino-terminal enhancer of split (AES), transcript variant 1, mRNA [NM_198969]	GTGTCTGTATATAGTCAGCTTATCTCGTGTTCAATCGTCTGATCTCTACAGAGAGAAGTG
A_24_P49383	-1.6164196	down	AAMDC	Homo sapiens adipogenesis associated, Mth938 domain containing (AAMDC), mRNA [NM_024684]	AAGGAAGTTGTTGAGAAGGGTGTACAGACTCTTGTGATTGGCCGAGGGATGAGTGAGGCC
A_32_P188860	-2.2494655	down	IL17RD	Homo sapiens interleukin 17 receptor D (IL17RD), mRNA [NM_017563]	ATGTTAATGACTTGATTTGTACATAACTCTGTAACTAGGTGAAAGTAGATCACAGCTGAC
A_23_P315815	-1.5520228	down	NRG1	Homo sapiens neuregulin 1 (NRG1), transcript variant HRG-gamma, mRNA [NM_004495]	AAATACTTCTTCATCTACATCTACATCCACCACTGGGACAAGCCATCTTGTAAAATGTGC
A_23_P386478	-2.0374591	down	TNIP3	Homo sapiens TNFAIP3 interacting protein 3 (TNIP3), transcript variant 1, mRNA [NM_024873]	AATACAGGAAAAGGCTTCTGACAGCTAAGATCCTGATCAAATTGGAGGAGCCAGTTATTA
A_32_P12202	-2.8446295	down	FAM9C	family with sequence similarity 9, member C [Source:HGNC Symbol;Acc:18405] [ENST00000333995]	TTTTTTGAAACAGCTGCAGCAAGAGTTGGCACTTATTCAGATGTATCTTCAACCTCTGTT
A_23_P431789	-1.5343696	down	ARF4	Homo sapiens ADP-ribosylation factor 4 (ARF4), mRNA [NM_001660]	GGTTTTTAATACTCAGCAGATTGTCTTCCCATATTGTGTCTTTTTTATGTTGCATGTTGC
A_23_P166280	-1.5178847	down	ICOSLG	inducible T-cell co-stimulator ligand [Source:HGNC Symbol;Acc:17087] [ENST00000407780]	CTCAGGGGAGTTCTCAGCTTGGACCCTTATCTCCCCAGAATCCTGGAACCTGCTCCTTCT
A_24_P3415	-1.7447126	down	PPP2R2C	Homo sapiens protein phosphatase 2, regulatory subunit B, gamma (PPP2R2C), transcript variant 2, mRNA [NM_181876]	GGAGGTCTTAATACAGTTCCTAGTTCCTTACTTCTGTTTTAAACTTTGGGTACCAAACCA
A_23_P41854	-1.5008615	down	CARD6	Homo sapiens caspase recruitment domain family, member 6 (CARD6), mRNA [NM_032587]	ACTAGCTTCTGCTAATAGCCCCAATTTGCTTGAATGGGAAAACTCTCTCATTTGACCCTT
A_33_P3328666	-1.5604061	down	CLTB	Homo sapiens clathrin, light chain B (CLTB), transcript variant 2, mRNA [NM_007097]	GGGTGTGTTGTTGACTCTTTTTACACTTATTTATTATCATTCTCACTTCTCTGGAAGCCA
A_33_P3231814	-1.7205907	down	XLOC_014512	BROAD Institute lincRNA (XLOC_014512), lincRNA [TCONS_l2_00014683]	GTACTTTACTCCACTATACATTTGAAAGTGGGTGCAATGGAAAAGTTTATGTGATGAGTT
A_24_P260443	-1.608147	down	THBS4	Homo sapiens thrombospondin 4 (THBS4), mRNA [NM_003248]	ACCATCCCTGAGGACTTCCAAGAGTTTCAAACCCAGAATTTCGACCGCTTCGATAATTAA
A_23_P350045	-1.6190021	down	REEP5	Homo sapiens receptor accessory protein 5 (REEP5), mRNA [NM_005669]	TCGGGAAGACTCCTCTACTCACAGCTGAAGAAAATGAGCACACCCTTCACACTGTTATTA
A_23_P60146	-2.4694748	down	PDGFRL	Homo sapiens platelet-derived growth factor receptor-like (PDGFRL), mRNA [NM_006207]	CCAGTCTATTCACAGAAGTGTTAACTTTTCTAACAGAAAGCATGATTTTGATTGCTTACC
A_23_P74609	-9.085237	down	G0S2	Homo sapiens G0/G1switch 2 (G0S2), mRNA [NM_015714]	CCAACACTGTGTGAATTATCTAAATGCGTCTACCATTTTGCACTAGGGAGGAAGGATAAA
A_33_P3411075	-1.6280917	down	FSCN1	Homo sapiens fascin homolog 1, actin-bundling protein (Strongylocentrotus purpuratus) (FSCN1), mRNA [NM_003088]	CTAAACGCCCATGATAGTAGCTTCAAACTGGAAATAGCGAAATAAAATAACTCAGTCTGC
A_23_P104563	-2.7119932	down	CPT1A	Homo sapiens carnitine palmitoyltransferase 1A (liver) (CPT1A), transcript variant 2, mRNA [NM_001031847]	ATGACGGCTATGGTGTGTCGTACATCCTTGTGGGAGAGAACCTCATCAATTTCCACATTT
A_33_P3221303	-1.9081815	down	CCR10	Homo sapiens chemokine (C-C motif) receptor 10 (CCR10), mRNA [NM_016602]	ACTACCTCTGTGCCTTGCCACATTAAATTGATAACATGGAAATGAGATGCAACCCAACAA
A_23_P71513	-1.7395504	down	EFR3A	Homo sapiens EFR3 homolog A (S. cerevisiae) (EFR3A), mRNA [NM_015137]	GGTCTTTGTTGATTTGGGTTTTGTTGGGGTTTTTGTTACTGTTTTTAAATTACAGTAGGC
A_23_P69242	-2.751767	down	SUMF1	Homo sapiens sulfatase modifying factor 1 (SUMF1), transcript variant 1, mRNA [NM_182760]	CAGTTCAGCCGTTGAACACATAGGAATGTCTGTGGGGTGACTCTACTGTGCTTTATCTTT
A_23_P98350	-1.6709875	down	BIRC3	Homo sapiens baculoviral IAP repeat containing 3 (BIRC3), transcript variant 1, mRNA [NM_001165]	TCCTATACATCGAAGGTGTGCATATATGTTGAATGACATTTTAGGGACATGGTGTTTTTA
A_33_P3304369	-1.549524	down			ACCAGACACAGGCCAAAGCCACTACAGAATCCGGAAGCCCCGGTTGGGATCTGAATTCTC
A_23_P98786	-1.7414415	down	MYO7A	Homo sapiens myosin VIIA (MYO7A), transcript variant 1, mRNA [NM_000260]	ATACCAACTGGGCCTCTGATGTTCTTCCAGTGAGGCATCTCTCTGGGATGCAGAACTTCC
A_23_P4190	-1.7709736	down	ACSF2	Homo sapiens acyl-CoA synthetase family member 2 (ACSF2), mRNA [NM_025149]	GCAAAGGGAAGATCTCTCACTTCAAGATTCCGAAGTACATCGTGTTTGTCACAAACTACC
A_33_P3286151	-2.564022	down	LOC100132891	Homo sapiens uncharacterized LOC100132891 (LOC100132891), transcript variant 2, long non-coding RNA [NR_033651]	TAAAGCCAGTATTATAGGACACTTCTCAGACTGAGAGCCCAATGTCGTTGGAAACCACTG
A_23_P161659	-2.3058383	down	SYT13	Homo sapiens synaptotagmin XIII (SYT13), transcript variant 1, mRNA [NM_020826]	AGGGTCCATTTCTCTTGGATGTAAAGGAGTCCTGGGTAAAATGTGGCTGTAACCTAAACC
A_23_P347468	-1.7902336	down	FZD3	Homo sapiens frizzled family receptor 3 (FZD3), transcript variant 1, mRNA [NM_017412]	TTAGGCATGAAATCAATCAGAAGAGAAAGAAAAATGCTGGAACATGCTTGATGTATTATG
A_23_P318284	-1.563908	down	GPD1L	Homo sapiens glycerol-3-phosphate dehydrogenase 1-like (GPD1L), mRNA [NM_015141]	CAGCCAATCTGTGAATGTAAAAACTACACTGTTGCCTTGCTAGGATCCACCCTCCTATAA
A_33_P3288859	-1.5551256	down	CDPF1	Homo sapiens cysteine-rich, DPF motif domain containing 1 (CDPF1), mRNA [NM_207327]	AACTACTCAAGGCCAACTGTCACATGAAGGAATGAATAAAGAGTTTTTACTGACTTGTGC
A_23_P33326	-1.9585367	down	ADRA1B	Homo sapiens adrenoceptor alpha 1B (ADRA1B), mRNA [NM_000679]	CTCCTTGTACTTCACTGAAGGATGGCACTTTGGTGGGGTTGGAAACAAAGTCGACATTAA
A_24_P257348	-2.7690563	down	ARL6IP5	Homo sapiens ADP-ribosylation-like factor 6 interacting protein 5 (ARL6IP5), mRNA [NM_006407]	GTTTTCACCAGCAAGTATTTGTTGCAAACTTAATGTCATTTTCCTTAAGATGGTTACAGC
A_23_P161507	-5.567644	down	MTL5	Homo sapiens metallothionein-like 5, testis-specific (tesmin) (MTL5), transcript variant 1, mRNA [NM_004923]	ACATAACTAGCTTGTGGAAACCAGCAGGTAAAATGAATTCTTAAGTTGACGCTTTTGGTT
A_19_P00322658	-9.269439	down		Q4U2V9_CHLRE (Q4U2V9) Hydroxyproline-rich glycoprotein GAS30 precursor, partial (5%) [THC2602224]	TGCAGCCTTCCTGGGATAAAGCTCTGCCTTTTAGTCTCTTATCCTACTTTTTAGAAGCCC
A_33_P3287218	-1.6712565	down	GSTK1	Homo sapiens glutathione S-transferase kappa 1 (GSTK1), transcript variant 2, mRNA [NM_001143679]	AAGTGCCTTTCAGAGAGCCCCAATTCTGCTTTCCCACAAAATAAACCTAATGCCATCAGG
A_23_P428329	-1.7961414	down	PTF1A	Homo sapiens pancreas specific transcription factor, 1a (PTF1A), mRNA [NM_178161]	CCCAGAAAACTCAACAGCAAATCTTCCTTCAACAACATAGAAAACGAACCACCATTTGAG
A_23_P75299	-1.6179806	down	LHPP	Homo sapiens phospholysine phosphohistidine inorganic pyrophosphate phosphatase (LHPP), transcript variant 1, mRNA [NM_022126]	TTTCTGGACCCACTGCTGGACAGACTTGAAGGTGTCATGCCCGGTGTGTGCAGGAGGAAA
A_23_P142714	-1.5239439	down	SLC25A12	Homo sapiens solute carrier family 25 (aspartate/glutamate carrier), member 12 (SLC25A12), transcript variant 1, mRNA [NM_003705]	CGGTTCTGAGTGGCTTGAAATGTACAGAATGTTTTGAAAGTGTTTTATTAAGAATCACAC
A_23_P76538	-2.3009117	down	TESC	Homo sapiens tescalcin (TESC), transcript variant 1, mRNA [NM_017899]	GCTCGTCTGCGCACCTTGTGTCTTGTAGGGTATGGTATGTGGGACTTCGCTGTTTTTATC
A_33_P3386621	-1.807519	down	LOC101928179	PREDICTED: Homo sapiens uncharacterized LOC101928179 (LOC101928179), misc_RNA [XR_243586]	GTGGCCAAGTTAGGGCTTTAGGTTACCCATCACCCAAATAAAGTATATTGTACCCATTAA
A_33_P3245290	-3.184736	down	AQP7P1	Homo sapiens aquaporin 7 pseudogene 1 (AQP7P1), non-coding RNA [NR_002817]	GTGATAAGAATATTACTTCCCATTTGTGTTGCTGTGAATATTAAATGCGCTACCACATGT
A_19_P00319324	-1.9817151	down	PLD1	phospholipase D1, phosphatidylcholine-specific [Source:HGNC Symbol;Acc:9067] [ENST00000497307]	GTAGATAACCACAAGCAGATGTGTCAAAGCTCTTTTGTCCAGGAATAAACTGAGTTTCGT
A_33_P3263890	-1.7531513	down	PRRX1	Homo sapiens paired related homeobox 1 (PRRX1), transcript variant pmx-1a, mRNA [NM_006902]	GATTTGTAGGGTACTTGGCAGGTTAAATTAAACCAGAAGAGGTGACTTAATAAAAAAGGG
A_24_P205045	-1.7097048	down	ERC2	Homo sapiens ELKS/RAB6-interacting/CAST family member 2 (ERC2), mRNA [NM_015576]	TGTATTAGCCAGTCATTGTAACCTCGTGTCTAGTAGAACAATGTACAAGGTATGTACAGT
A_23_P141035	-1.5609988	down	CHST4	Homo sapiens carbohydrate (N-acetylglucosamine 6-O) sulfotransferase 4 (CHST4), transcript variant 1, mRNA [NM_005769]	TGCACAAAAGAGCAAGCTCTTAAGTTCACAGGGTGCCTGGGCTGCATTTGAATATCACTT
A_33_P3349637	-1.7311438	down	PCDH1	Homo sapiens protocadherin 1 (PCDH1), transcript variant 1, mRNA [NM_002587]	GGCTTCTGGGGCTGGGTCCCACATGCCCTTGACCCTGACAATAAAGTTCTCTATTTTTGG
A_23_P20743	-1.5337023	down	TMEM246	Homo sapiens transmembrane protein 246 (TMEM246), mRNA [NM_032342]	GCAGGACCATGTGGATAGATTCCATTTGTTTCCTTGACCTGATGTAATAAAAACTGATAA
A_23_P91081	-2.3239443	down	EPCAM	Homo sapiens epithelial cell adhesion molecule (EPCAM), mRNA [NM_002354]	TCAAAATATAAGCAGCTTGAAACTGGCTTTACCAATCTTGAAATTTGACCACAAGTGTCT
A_23_P116602	-1.6224787	down	USP35	Homo sapiens ubiquitin specific peptidase 35 (USP35), mRNA [NM_020798]	TGCTGTAGCCCCCTTCTAACTTCTAACCGAAGACAAGACAGACACCCATGTTCTTAAATA
A_23_P78108	-1.9944136	down	ALDOC	Homo sapiens aldolase C, fructose-bisphosphate (ALDOC), mRNA [NM_005165]	TGGCCAGGGCCAAATAGCTATGCAGAGCAGAGATGCCTTCACCTGGCACCAACTTGTCTT
A_23_P202978	-1.9378443	down	CASP1	Homo sapiens caspase 1, apoptosis-related cysteine peptidase (CASP1), transcript variant alpha, mRNA [NM_033292]	CTGTTCCTGTGATGTGGAGGAAATTTTCCGCAAGGTTCGATTTTCATTTGAGCAGCCAGA
A_23_P388871	-1.7613249	down	HIST4H4	Homo sapiens histone cluster 4, H4 (HIST4H4), mRNA [NM_175054]	ACAGTGGGCAGCCCGATTTTCTGCTGAGTAGGCGCTGTGATTTCAGAATGTCTGGGCGAG
A_33_P3368049	-2.4050546	down	C1orf233	Homo sapiens chromosome 1 open reading frame 233 (C1orf233), mRNA [NM_001242659]	GCCGGTCAGGCGCAAACCTGGCGCCAGTGTCTAAATGTCCATCATTCTCAGACCAACAGA
A_24_P56363	-1.7312768	down	CAB39L	Homo sapiens calcium binding protein 39-like (CAB39L), transcript variant 1, mRNA [NM_030925]	CCCTGACAGTTCAGAGTCCCTTCGAATTGCACTTTTCTGGTTTCGCTTATTTAATTAAAA
A_33_P3317321	-1.7059838	down	TPMT	Homo sapiens thiopurine S-methyltransferase (TPMT), mRNA [NM_000367]	CACTGGGGAATACTGACTTCCTAAAATCTCAAGATGGAAGATATACCACATGTAAATTAT
A_23_P47148	-1.7399337	down	NOX4	Homo sapiens NADPH oxidase 4 (NOX4), transcript variant 1, mRNA [NM_016931]	AGTGCAATTTCTAAGACTTTGAAACTCAGCGGAATCAATCAGCTGTGTTATGCCAAAGAA
A_23_P33759	-2.145256	down	DHRS3	Homo sapiens dehydrogenase/reductase (SDR family) member 3 (DHRS3), mRNA [NM_004753]	AGGCAGGAAAACAGCCAGAAGCCACCTTGACACTTTTGAACATTTCCAGTTCTGTAGAGT
A_33_P3351559	-1.511823	down	ETNK1	Homo sapiens ethanolamine kinase 1 (ETNK1), transcript variant 1, mRNA [NM_018638]	GGATAAAATGAGGTTGGCAGTGAAGAAAATTAAAAACAGCCTCATTCATGTAACTGGTTA
A_33_P3337931	-2.1139932	down			CTACCAAAGCTGTGTATTTTTCATTTCTTCATGGCACTGTGCTGTTAATTTCTGTTAACA
A_33_P3420816	-1.6596552	down	GDF1	Homo sapiens growth differentiation factor 1 (GDF1), mRNA [NM_001492]	TCTTTGACAACAGCGACAACGTGGTGCTGCGGCAGTATGAGGACATGGTGGTGGACGAGT
A_33_P3666797	-2.6137702	down	GPR180	Homo sapiens G protein-coupled receptor 180 (GPR180), mRNA [NM_180989]	GGGATCCTCTTACACCTTGCTCTATGTATGTCTTCTTTTGGCTGTTCTGATTTGTATCCT
A_23_P134426	-1.7003886	down	GPNMB	Homo sapiens glycoprotein (transmembrane) nmb (GPNMB), transcript variant 1, mRNA [NM_001005340]	ACCAGGCATGATGCTGAGTGACACTCTTGTGTATATTTCCAAATTTTTGTACAGTCGCTG
A_23_P92467	-1.8035034	down	QRFPR	Homo sapiens pyroglutamylated RFamide peptide receptor (QRFPR), mRNA [NM_198179]	GATGATGTCACAATCAAGATGATTTTTGCTATCGTGCAAATTATTGGATTTTCCAACTCC
A_33_P3784253	-1.766178	down	PAK1	Homo sapiens p21 protein (Cdc42/Rac)-activated kinase 1 (PAK1), transcript variant 1, mRNA [NM_001128620]	CTCAAGACTTTGATCCTTGGAAACCGTGTGTCCAGCATTGAAGAGAACTGCAACTGAATG
A_24_P364236	-2.2540455	down	NDUFC2	Homo sapiens NADH dehydrogenase (ubiquinone) 1, subcomplex unknown, 2, 14.5kDa (NDUFC2), transcript variant 1, mRNA [NM_004549]	AAATCAAATGATTTCTGTCTCTATTTTCTTGAGTACCAATTGTAAAAACTGAAATTAGGT
A_19_P00315583	-1.7330455	down	LOC100130691	Homo sapiens uncharacterized LOC100130691 (LOC100130691), long non-coding RNA [NR_026966]	GCACGTCCTCATTATATGTAAGGAATCTATTTCCTAGAATCCTATAAAAAGCTCAAGTGA
A_33_P3241269	-2.8155205	down	CES1	Homo sapiens carboxylesterase 1 (CES1), transcript variant 1, mRNA [NM_001025195]	AGGAGCAAGTTTTGTATTTGTGACCTCAGCTTTGGGAATAAAGGATCTTTTGAAGGCCAA
A_23_P251562	-1.5512946	down	TUSC2	Homo sapiens tumor suppressor candidate 2 (TUSC2), mRNA [NM_007275]	CTCTGTGCTTCTATAATGTGGGAAATGGCTTGGGGAGGATGGCCCCTAGCTTAGGAAGAC
A_33_P3215948	-2.7536912	down	MPZL2	Homo sapiens myelin protein zero-like 2 (MPZL2), transcript variant 1, mRNA [NM_005797]	GTAATATGGGCCTGTTGTTTAGTGTCTCCTTCCTAAAGAGCACTTTTGTATTGTAATTTA
A_19_P00332220	-1.604907	down	C14orf132	Homo sapiens chromosome 14 open reading frame 132 (C14orf132), transcript variant 2, mRNA [NM_001252507]	CTGTGAAATCTCACTTTGTTAGCGTTGCTGCTGTTGTCATTTTCTATTATGATAACTGAA
A_23_P24083	-2.0568843	down	PNLIPRP2	Homo sapiens pancreatic lipase-related protein 2 (PNLIPRP2), transcript variant 1, mRNA [NM_005396]	TAGCAGCGACACTGTGGAAGAAAACGTCTTGCAATCTCTTTACCCTTGTTAAAAACGTGG
A_23_P28815	-1.8695517	down	CYP24A1	Homo sapiens cytochrome P450, family 24, subfamily A, polypeptide 1 (CYP24A1), transcript variant 1, mRNA [NM_000782]	AACAGCTAAATTTTCTGGGGCTGGGAGTAATACTGACAATCCATTTACTGTAGCTCTGCT
A_33_P3423585	-3.265037	down	UNC13C	Homo sapiens unc-13 homolog C (C. elegans) (UNC13C), mRNA [NM_001080534]	AGTGTGATGCGATCCTCTGGCATATGCTTTAATAAATGGATGTATATTGAGCACATGCAG
A_23_P381368	-1.9409559	down	HOXD10	Homo sapiens homeobox D10 (HOXD10), mRNA [NM_002148]	TGCTGGAGGACTGGGAAAGCGGAAACAAAACCTTCACCGCTCTTTGTTTGTTGTTTTGTT
A_24_P89891	-2.9789045	down	TRAF1	Homo sapiens TNF receptor-associated factor 1 (TRAF1), transcript variant 1, mRNA [NM_005658]	GATGAGATGATAATTTAAGACACTGAATGATTTCTTTTCCAACAAAGCTCTATGTTAAGT
A_33_P3275315	-3.300353	down	CELF2-AS1	CELF2 antisense RNA 1 [Source:HGNC Symbol;Acc:23515] [ENST00000379256]	AGAGTGCCAGATACACAGGTGGCATTTTATGGCAGTGGTCACTGGGACCCAACTCCCTTC
A_23_P404059	-6.1599364	down	PASD1	Homo sapiens PAS domain containing 1 (PASD1), mRNA [NM_173493]	GGGTAGAGACTTATTTGTTTCCTGATAGGTTATGTTTGTAATTGTTTGTTAAGCACAGCC
A_23_P415706	-2.0405688	down	GPR133	Homo sapiens G protein-coupled receptor 133 (GPR133), mRNA [NM_198827]	GAACTATCTTTAGTTTAGATGGAATTATTTGTTTTTAATTGTTGCCGTATTCATCTATAT
A_33_P3227793	-2.1945443	down	CGREF1	Homo sapiens cell growth regulator with EF-hand domain 1 (CGREF1), transcript variant 1, mRNA [NM_006569]	AAGAACACCCAAAATGACTTTGAGGTGCACATTGTTCAAGTGGAGAATGATGAGATCTAG
A_23_P141306	-1.7139041	down	GLP2R	Homo sapiens glucagon-like peptide 2 receptor (GLP2R), mRNA [NM_004246]	AGATCCTCTTCTCTTTCATCACTGATGATCAAGTTGAAGGATTTGCAAAACTTATACGAC
A_23_P250516	-1.6163567	down		PREDICTED: Homo sapiens uncharacterized LOC101928710 (LOC101928710), misc_RNA [XR_243765]	CTGCATCCTTTCCAGCAAGATGTCATTCTGAGATTTTTGTCATTCCTGGGCGTTATGAGG
A_23_P144369	-2.3827393	down	NAP1L5	Homo sapiens nucleosome assembly protein 1-like 5 (NAP1L5), mRNA [NM_153757]	TAGCAAATTATGTAAAGCATGTGTATCCAGCGTTATGTACTTTGCGCCTTGTGACGTCTT
A_33_P3358621	-1.8192822	down	LOC100506036	PREDICTED: Homo sapiens uncharacterized LOC100506036 (LOC100506036), misc_RNA [XR_109916]	ACTCCAACTTTGAAACCACTAGCCTGTAGGTGTGGACGAAAAGGCAGCTGCATGTTATAA
A_32_P83845	-1.8217874	down	HEY1	Homo sapiens hes-related family bHLH transcription factor with YRPW motif 1 (HEY1), transcript variant 2, mRNA [NM_001040708]	GGGCTATAAAATATCATTTTTCAGGTTTATTCTTTTAGCAGGTGTAGTTAAACGACCTCC
A_23_P94754	-1.8843596	down	TNFSF15	Homo sapiens tumor necrosis factor (ligand) superfamily, member 15 (TNFSF15), transcript variant 1, mRNA [NM_005118]	AAACAGTATAAACTTTCAGAGGCAAAATCCTTCACCAATTTTTCCACATACTTTCATGCC
A_19_P00803558	-1.6990331	down	KCNA6	Homo sapiens potassium voltage-gated channel, shaker-related subfamily, member 6 (KCNA6), mRNA [NM_002235]	CAACCAAGCCAGAAAAAGTTGAGACCAGACCCGTTGTCCCTAAAGATGGGGCCCAGAATG
A_33_P3399090	-2.1378174	down	DIXDC1	Homo sapiens DIX domain containing 1 (DIXDC1), transcript variant 1, mRNA [NM_001037954]	GTGATAACCAGTTTTAACTGCCGGTATGTACCAGATTTGTGAACTAATTTAAAAAACCAC
A_33_P3336652	-1.6130031	down	NDUFC2	Homo sapiens NADH dehydrogenase (ubiquinone) 1, subcomplex unknown, 2, 14.5kDa (NDUFC2), transcript variant 2, mRNA [NM_001204054]	TCCTCTACATCGGCTTCTTGGGCTACTGCTCCGGCCTGATTGATAACCTAATCCGGCGGA
A_23_P339818	-1.7275826	down	ARRDC4	Homo sapiens arrestin domain containing 4 (ARRDC4), mRNA [NM_183376]	GCACAGTAAGAAACAATAGGCAAGCGTTATGTTTTTGGTAAGTTAACTATGAAAGCTTTC
A_23_P143029	-1.8961573	down	HOXD11	Homo sapiens homeobox D11 (HOXD11), mRNA [NM_021192]	AAAGAAAAGAAACTGAACAGAGACCGTCTGCAGTATTTCACTGGAAACCCCTTATTTTGA
A_33_P3369401	-2.3214445	down	CYP24A1	Homo sapiens cytochrome P450, family 24, subfamily A, polypeptide 1 (CYP24A1), transcript variant 1, mRNA [NM_000782]	GAAAAAGAATGTGCATTGGTCGCCGATTAGCAGAGCTTCAACTGCATTTGGCTCTTTGTT
A_23_P62607	-2.1750207	down	IL22RA1	Homo sapiens interleukin 22 receptor, alpha 1 (IL22RA1), mRNA [NM_021258]	ACCTACCTCATGGAGATTGTGGTGAAGATGAAATGAAGTCATGTCTTTAAAGTGCTTAAT
A_33_P3374210	-2.9665663	down	MKI67	Homo sapiens marker of proliferation Ki-67 (MKI67), transcript variant 1, mRNA [NM_002417]	ATAAATGCTCTGCAAGCCCTCCCTTAAGACGGCAGTGTATTAGAGAAAATGGAAACGTAG
A_23_P201386	-2.223966	down	DDAH1	Homo sapiens dimethylarginine dimethylaminohydrolase 1 (DDAH1), transcript variant 1, mRNA [NM_012137]	TGATTGGTCTTTTCAGCTACTCTGAACAGATTACTAAGGCCATCTCCTCATCTCTAAGGG
A_23_P13094	-4.3333077	down	MMP10	Homo sapiens matrix metallopeptidase 10 (stromelysin 2) (MMP10), mRNA [NM_002425]	ATGTATTATGAGCCAAAATGGTTAATTTTTCCTGCATGTTCTGTGACTGAAGAAGATGAG
A_24_P391230	-2.0830379	down	CYYR1	Homo sapiens cysteine/tyrosine-rich 1 (CYYR1), mRNA [NM_052954]	TTGTATTAAGTGTCATAATAGCATCAATGTGCACATTACCAGTATAGACTGTTGGAGTTC
A_24_P379233	-1.5886923	down	GJB3	Homo sapiens gap junction protein, beta 3, 31kDa (GJB3), transcript variant 1, mRNA [NM_024009]	ACCCCACTCTGAGTTCACTAAGTTATGCAACTTTCGTTTTGGCAGATATTTTTTGACACT
A_23_P8834	-1.8553001	down	EPHX2	Homo sapiens epoxide hydrolase 2, cytoplasmic (EPHX2), transcript variant 1, mRNA [NM_001979]	TGGCCTTACACACATCTTGCATGGATGGCAGCATTGTTCTGAAGGGGTTTGCAGAAAAAA
A_23_P87310	-1.6403713	down	LMO1	Homo sapiens LIM domain only 1 (rhombotin 1) (LMO1), transcript variant 1, mRNA [NM_002315]	CCCTCCTGGGGCCAGGCCGGGCCTGTACAGTCTGTCTTCTGTATATACATGGGAACATTT
A_24_P25234	-2.7882676	down	MTL5	Homo sapiens metallothionein-like 5, testis-specific (tesmin) (MTL5), transcript variant 2, mRNA [NM_001039656]	TATCTCGACATCTGCAATACTGATGATATACTGGAATCTCTACCAATTTATTTTTGGTGG
A_32_P118586	-1.8371488	down	DENND6A	Homo sapiens DENN/MADD domain containing 6A (DENND6A), mRNA [NM_152678]	AATCACTGCTTTAAGGGTATTATGTAATGCCTAGTGCCTTCTATTTACAGTGAAAAAGAG
A_24_P355493	-1.5203277	down	LHPP	Homo sapiens phospholysine phosphohistidine inorganic pyrophosphate phosphatase (LHPP), transcript variant 1, mRNA [NM_022126]	TGGAGCTGGAAAAACCTGTGCTCATATCACTGGGAAAAGGGCGTTACTACAAGGAGACCT
A_23_P417974	-2.130673	down	AQP11	Homo sapiens aquaporin 11 (AQP11), mRNA [NM_173039]	TAACATACAGGACAGTCCAGCTGGATGTGATAAAGATTTTATCACCTCATATGGAAAACA
A_23_P302681	-1.7829607	down	FIGNL1	Homo sapiens fidgetin-like 1 (FIGNL1), transcript variant 1, mRNA [NM_001042762]	CTGGAACAAAACTTTTGGTTGTGGAAAGTAAGTGGGATACTTGGAATCAAGGCATCTCTG
A_23_P128817	-1.5185137	down	PCK2	Homo sapiens phosphoenolpyruvate carboxykinase 2 (mitochondrial) (PCK2), transcript variant 1, mRNA [NM_004563]	CTGGGCAAACCCTGGAAACCTGGTGACAAGGAGCCCTGTGCACATCCCAACTCTCGATTT
A_33_P3265359	-2.6147642	down	HES6	Homo sapiens hes family bHLH transcription factor 6 (HES6), transcript variant 1, mRNA [NM_018645]	GTACATCTTGTTTGTAGCACACTTGAGTTTGTGTATTCCATTGACATCAAATGTGACAAT
A_32_P138032	-2.38339	down	C1orf61	Homo sapiens chromosome 1 open reading frame 61 (C1orf61), mRNA [NM_006365]	ATGGCTAAGTTGGGAGACCAAAAAGAAGAATGTACTTCATCTGGTTGGGCTGGATTCCCT
A_19_P00803342	-1.657167	down	ZNF678	Homo sapiens zinc finger protein 678 (ZNF678), transcript variant 1, mRNA [NM_178549]	TACCTGAAGTTCTGTTTGCTGTCATGTGGAAGAAAAGAGCCTTGGAGAAGTTTTATTTTT
A_23_P24384	-1.9535928	down	CCDC88B	Homo sapiens coiled-coil domain containing 88B (CCDC88B), mRNA [NM_032251]	TGGCCTGGGCTGATCTTGAGCCTTAACTGGACATGAGGGGCATGAGAATAAAGCTGAACT
A_24_P330518	-2.82685	down	CA12	Homo sapiens carbonic anhydrase XII (CA12), transcript variant 1, mRNA [NM_001218]	CTGTCAAAAGACTCTGTATATCTTTTGTGGATGAGTTTTGTGAGAGAACAGAGAGACCAT
A_24_P410797	-1.6139067	down	KALRN	Homo sapiens cDNA FLJ43991 fis, clone TESTI4019843, highly similar to Rattus norvegicus huntingtin-associated protein interacting protein (duo) (Hapip). [AK125979]	GTTGCAAGACCCTTCCGAACACATTCCTGTATAAAGTATTTTGCACTATTTAAAGAAACC
A_23_P139600	-1.8668659	down	RASAL1	Homo sapiens RAS protein activator like 1 (GAP1 like) (RASAL1), transcript variant 2, mRNA [NM_004658]	ATTCTGTGGTTTGGAGGCTCCCAGAGACGTGCCTAGTCCTGTGTGCCTTGAGTCCAGAAC
A_23_P119562	-1.8923093	down	CFD	Homo sapiens complement factor D (adipsin) (CFD), mRNA [NM_001928]	GGCCTGAAGGTCAGGGTCACCCAAGCAACAAAGTCCCGAGCAATGAAGTCATCCACTCCT
A_33_P3408320	-2.3082626	down	CERS1	Homo sapiens ceramide synthase 1 (CERS1), transcript variant 2, mRNA [NM_198207]	CCATCAGATTCGCCTTGGGTGTAGATGAAACAGAAATAAAAGAATCAAAGACGACTCAAG
A_23_P253221	-2.0405767	down	ARHGEF4	Homo sapiens Rho guanine nucleotide exchange factor (GEF) 4 (ARHGEF4), transcript variant 2, mRNA [NM_032995]	TTGCACTATTCCTTCTCCAAGCCAGAAACCACATTTAATTTCATAAATAAATTTATGAAA
A_24_P182620	-5.720351	down	CELSR2	Homo sapiens cadherin, EGF LAG seven-pass G-type receptor 2 (CELSR2), mRNA [NM_001408]	TGCTTTTCATCTGAGTCACCATTTACTCCAAGCATGTATTCCAGACTTGTCACTGACTTT
A_23_P57709	-1.6688706	down	PCOLCE2	Homo sapiens procollagen C-endopeptidase enhancer 2 (PCOLCE2), mRNA [NM_013363]	TATCTGATTGGAAACCTGCCGACTTAGTGCGGTGATAGGAAGCTAAAAGTGTCAAGCGTT
A_24_P286114	-1.770858	down	SLC1A3	Homo sapiens solute carrier family 1 (glial high affinity glutamate transporter), member 3 (SLC1A3), transcript variant 1, mRNA [NM_004172]	GTGGCTGTCCTCTTAAGACACTAGTAGAGCAAAGACTTAATCATATCAACTTAATTCTGT
A_33_P3377529	-1.6890258	down	HOXA4	Homo sapiens homeobox A4 (HOXA4), mRNA [NM_002141]	TTCTTACTTGCATTTATTTAAGACACTGTTACAGAGATACTGTTGTCCCCTTCTGGGGCA
A_32_P155460	-1.6440247	down	LINC00162	Homo sapiens long intergenic non-protein coding RNA 162 (LINC00162), long non-coding RNA [NR_024089]	TTCCTCAGACATCTGCAGTCACTTCACAGTGAATGAGGCTCCAGCCGGGTGCCCTGAGAA
A_23_P162165	-2.0385146	down	KCTD14	Homo sapiens potassium channel tetramerization domain containing 14 (KCTD14), transcript variant 1, mRNA [NM_023930]	ACATCAGGCAATTTCCAGGGTTGGTCTAGAGTCTTGCCACTAAATATTGATCACTCGTTT
A_23_P163402	-2.0240898	down	CYP1A1	Homo sapiens cytochrome P450, family 1, subfamily A, polypeptide 1 (CYP1A1), mRNA [NM_000499]	GGTAAAACAGGGCCACATAGATGCTGATGGAGCCTTCCCAAGTTGTGCTTGAGCCAGGAG
A_32_P131640	-1.6658788	down	SLITRK4	Homo sapiens SLIT and NTRK-like family, member 4 (SLITRK4), transcript variant 2, mRNA [NM_173078]	TACTGTGGAGTCCTGTGGGGATACTGCAAACTCTATTGCCAAAGGGATGCTTTATACACA
A_23_P68211	-1.6719947	down	SPR	Homo sapiens sepiapterin reductase (7,8-dihydrobiopterin:NADP+ oxidoreductase) (SPR), mRNA [NM_003124]	GAACACAGAAGAGAGGAGGTTGTGTCTCTTGCTCATAGCAAGCCTGTGGGTAGAGGAAAG
A_23_P163235	-1.865896	down	CKMT1A	Homo sapiens creatine kinase, mitochondrial 1A (CKMT1A), mRNA [NM_001015001]	TGGCTCGAGACTGGCCAGATGCTCGTGGAATTTGGCACAACAATGAGAAGAGCTTCCTGA
A_33_P3251073	-1.6661911	down	TMEM52	Homo sapiens transmembrane protein 52 (TMEM52), mRNA [NM_178545]	CAGGGCCACCTGTGACGTCTGCATCTTCTTGGAGAGAGAATAAAGTTTGTATTTAAGTGG
A_33_P3303697	-1.7268621	down	CR2	Homo sapiens complement component (3d/Epstein Barr virus) receptor 2 (CR2), transcript variant 1, mRNA [NM_001006658]	GCTTTTCATTTAGAAGCACGAGAAGTATATTCTGTTGATCCATACAACCCAGCCAGCTGA
A_23_P329353	-1.8049659	down	CNRIP1	Homo sapiens cannabinoid receptor interacting protein 1 (CNRIP1), transcript variant CRIP1a, mRNA [NM_015463]	ATAACGTATTAAAACTCTTTTAAGTAGCTTAAGGTATTGTGCAATGGCCTAGCCTAGTAG
A_33_P3379406	-1.7024498	down	GREB1	Homo sapiens GREB1 protein, mRNA (cDNA clone IMAGE:6729261), partial cds. [BC071853]	ACCGCTGTCTCTTGTTAGTCAGGGGACCTTGGCCAAGTCTCAATAAATGTTTCTTCATCT
A_23_P99741	-1.6981655	down	CDKL1	Homo sapiens cyclin-dependent kinase-like 1 (CDC2-related kinase) (CDKL1), transcript variant 1, mRNA [NM_004196]	CCCAGCTAACTGGCAGCAGCATCCTTCCAGCTTTGGATAATAAGAAGTACTACTGTGATA
A_33_P3376971	-1.8324687	down	CHAC1	Homo sapiens ChaC, cation transport regulator homolog 1 (E. coli) (CHAC1), transcript variant 1, mRNA [NM_024111]	TTCCTGGGAAGCTCATCACTACAGGCCCTGGCAACCTTCCCAGTCTGTCCCATACTGTTA
A_23_P211850	-2.0457168	down	ABHD6	Homo sapiens abhydrolase domain containing 6 (ABHD6), mRNA [NM_020676]	TGGGCCTCTTTTCTATTTCAATGTGCTACTAAGAACCCTTGGATGTAACATACTAGTTAG
A_24_P217572	-2.2604477	down	EDNRA	Homo sapiens endothelin receptor type A (EDNRA), transcript variant 1, mRNA [NM_001957]	GGTTGGTTTGATAAAGCAGTATTTGGGGTCATATTGTTTCCTGTGCTGGAGCAAAAGTCA
A_33_P3348614	-1.5135165	down	TBL1XR1	Homo sapiens transducin (beta)-like 1 X-linked receptor 1 (TBL1XR1), mRNA [NM_024665]	TATTTGAAGTTTGCTGGAATGCAGCAGGAGACAAAGTTGGAGCCAGTGCATCAGATGGTT
A_33_P3350726	-1.9552692	down	PPARG	Homo sapiens peroxisome proliferator-activated receptor gamma (PPARG), transcript variant 3, mRNA [NM_138711]	ACAATCAGATTGAAGCTTATCTATGACAGATGTGATCTTAACTGTCGGATCCACAAAAAA
A_24_P237661	-1.844425	down	NCOR1	Homo sapiens nuclear receptor corepressor 1 (NCOR1), transcript variant 2, mRNA [NM_001190438]	CCTTCAAAACTTTCAAAGGAAGAGTTAATAGAGTGTATGGATCGTGTAGATCGAGAAATT
A_23_P65518	-1.669982	down	DACT1	Homo sapiens dishevelled-binding antagonist of beta-catenin 1 (DACT1), transcript variant 1, mRNA [NM_016651]	ACCGAAGCGTTGACCTGAACATATTAGTGCAATCCAGTCCAGATTGGACCTTTGATCCTA
A_23_P89601	-3.1878288	down	KRT32	Homo sapiens keratin 32 (KRT32), mRNA [NM_002278]	AACTGTTCTCTTTGGTGATGTTTCTGGTTGTCTGTGCTGCCTCAAAGAGCGTGTGTTCTT
A_23_P20107	-1.5766282	down	GSTK1	Homo sapiens glutathione S-transferase kappa 1 (GSTK1), transcript variant 1, mRNA [NM_015917]	GCAAAGGACTATACATGGCAAATGACTTAAAGCTCCTGAGACACCATCTCCAGATTCCCA
A_33_P3409154	-1.81524	down	SLC22A23	Homo sapiens solute carrier family 22, member 23 (SLC22A23), transcript variant 1, mRNA [NM_015482]	AAGGAGCGCGGGTCGGAGGAGACAAACTCTTTGGAAATAACCCTTTCAAGACTTTCTTTT
A_33_P3293237	-1.7514385	down		Q86TZ0_HUMAN (Q86TZ0) Full-length cDNA clone CS0DC023YN15 of Neuroblastoma of Homo sapiens (human) (Fragment), partial (30%) [THC2780218]	GAAAACCTAGCCTCATTCTCTGGTGGCCTGTCTTGCAAAAGAGAGATGAAATCAAACCTG
A_19_P00317412	-1.5189898	down	LOC728431	Homo sapiens uncharacterized LOC728431 (LOC728431), long non-coding RNA [NR_038842]	AAGGATGCCCTAAGCCAAAGGAAGTCCTTCCTGGGGTCTAATCTCTACCTTTTGCATGAT
A_33_P3577142	-1.672027	down		Homo sapiens cDNA FLJ40824 fis, clone TRACH2011113. [AK098143]	GGTAATGTGATCTCACTGTGGCTTTTGTTTTCATTTCCCTAATGTTTAGTTATGTTGATC
A_23_P129209	-1.5941939	down	IDH2	Homo sapiens isocitrate dehydrogenase 2 (NADP+), mitochondrial (IDH2), mRNA [NM_002168]	GCGTTTCAAGGACATCTTCCAGGAGATCTTTGACAAGCACTATAAGACCGACTTCGACAA
A_23_P410115	-2.6208599	down	ENTHD1	Homo sapiens ENTH domain containing 1 (ENTHD1), mRNA [NM_152512]	TGCTAGTGTTAGGAGTTAAATGGAAACAAGAAGGACATGGGGCAAATGTTTTTACTGTCA
A_23_P13554	-1.6807387	down	ALG8	Homo sapiens ALG8, alpha-1,3-glucosyltransferase (ALG8), transcript variant 2, mRNA [NM_001007027]	TCCTGGAAGGTGAAGTACCCCTTCATCCCTTTGTTACTAACCTCAGTGTATTGTGCAGTA
A_23_P206310	-1.587379	down	KIAA0513	Homo sapiens KIAA0513 (KIAA0513), transcript variant 2, mRNA [NM_014732]	TGTTGCATTTTTGCAATCTTGTGTCCCGCTCGGTGATGTTCTACAAACTCTGTTTTAAGG
A_33_P3226060	-2.1120663	down	TMEM178B	Homo sapiens transmembrane protein 178B (TMEM178B), mRNA [NM_001195278]	CAACCTGTCCCGAGGACCAACTACCCTAAATCCAGACCCGAGAATGGGACAGTGTGCTAA
A_33_P3303339	-4.037601	down			AGCCAATCTGCAAGCCCATTTGAATGAAGGTGTCATGTGGTGAACCACTGTTTTACATGC
A_24_P366526	-1.6867754	down	SYNGR2	Homo sapiens synaptogyrin 2, mRNA (cDNA clone MGC:102914 IMAGE:4746277), complete cds. [BC105992]	GGAGATGCCCGGCCCTGGGATGCTGTTTGGAGATGGAATAAATGTTTTCTCATTCAAAAA
A_23_P44264	-2.054591	down	EMX2	Homo sapiens empty spiracles homeobox 2 (EMX2), transcript variant 1, mRNA [NM_004098]	TCCAAGATCATAGACTTACTAAAGAGAGTGACAAATGCTTCCTTAATGTCTTCTATACCA
A_24_P921477	-1.5767258	down	METTL23	Homo sapiens methyltransferase like 23 (METTL23), transcript variant 6, mRNA [NM_001206987]	CTTCCAGGAATTTTGGCTGCCAAATGTGGTGCAGAAGTAATACTGTCAGACAGCTCAGAA
A_24_P289178	-1.7539471	down	C16orf74	Homo sapiens chromosome 16 open reading frame 74 (C16orf74), mRNA [NM_206967]	CCCCAGGGCTGTGCAAACACATGCCCCTGCCATAAGCACCAACAAGAACTTCTTGCAGGT
A_24_P118196	-1.5300257	down	GXYLT2	Homo sapiens glucoside xylosyltransferase 2 (GXYLT2), mRNA [NM_001080393]	TATGAAGCAATACGGGATTTTCCCTTTCAAGACAATCTCTTTCAATCCATGTATTACCCC
A_33_P3267330	-2.150261	down	HAR1B	Homo sapiens highly accelerated region 1B (non-protein coding) (HAR1B), long non-coding RNA [NR_003245]	GGACCCCATAAATAGCAACACCCTGTATGTACTCATGACAATTTTTTAAAAAAGAACACT
A_23_P361584	-2.1375232	down	TMEM154	Homo sapiens transmembrane protein 154 (TMEM154), mRNA [NM_152680]	GCATTTTCGTACATTTTAAGCAAACTAGGTTAACAACAACATAGCCTAGTCAAACTTCTC
A_24_P371053	-1.5619727	down	ORMDL1	Homo sapiens ORM1-like 1 (S. cerevisiae) (ORMDL1), transcript variant 1, mRNA [NM_016467]	GAATGAAAAGAGTTACAGACCAACTTAAACATCAATTCGTGTCAGTAAACTGACTTTTGG
A_33_P3371115	-4.473873	down	AQP7P3	Homo sapiens aquaporin 7 pseudogene 3 (AQP7P3), non-coding RNA [NR_026558]	ATGTGAAGCTTGAGGATTCCTTCATCTCTTTGCCCAATGGCATTGTGATTATTAAACTCT
A_24_P310756	-1.51548	down	FBXO28	Homo sapiens F-box protein 28 (FBXO28), transcript variant 1, mRNA [NM_015176]	TTGTGTCTGAAGAGAACCATGACATTTAGAAGTATATTGGTAATCTATTAGGTCCATTGG
A_33_P3273230	-1.686005	down	HORMAD1	Homo sapiens HORMA domain containing 1 (HORMAD1), transcript variant 1, mRNA [NM_032132]	CCCAGATTACCAGCCTCCCGGTTTTAAGGATGGTGATTGTGAAGGAGTTATATTTGAAGG
A_23_P145644	-3.161138	down	DDC	Homo sapiens dopa decarboxylase (aromatic L-amino acid decarboxylase) (DDC), transcript variant 2, mRNA [NM_000790]	TCAATGTTCACGCAACTTGAAATTATATCTGTGGTCTTCAAATTGTCTTTTGTCATGTGG
A_33_P3277890	-2.0179582	down		WASH and IL9R antisense RNA 1 [Source:HGNC Symbol;Acc:38513] [ENST00000399966]	GGCAGTGTATTTGTAATGGTACATAAAATGACGTCTGCTTTATAAGCATTCTCATTCCTA
A_23_P9523	-1.5455011	down	RBKS	Homo sapiens ribokinase (RBKS), mRNA [NM_022128]	CAGGCTGCAGGAACACAGTCATCTTACCCTTACAAAAAAGACCTTCCGCTTACTCTGTTT
A_33_P3254311	-2.0655303	down		T cell receptor beta variable 30 (gene/pseudogene) [Source:HGNC Symbol;Acc:12214] [ENST00000417977]	TGAGTTCTAAGAAGCTCCTTCTCAGTGACTCTGGCTTCTATCTCTGTGCCTGGAGTGTCA
A_24_P101800	-3.5406032	down	C20orf112	chromosome 20 open reading frame 112 [Source:HGNC Symbol;Acc:16106] [ENST00000485364]	TTCGTGTGATGACCGAGGTTACTGTATATTGAGCATTCAGTGTATGCTGGCACTGTGCAT
A_23_P9711	-1.5433465	down	HS3ST4	Homo sapiens heparan sulfate (glucosamine) 3-O-sulfotransferase 4 (HS3ST4), mRNA [NM_006040]	ATTAAACTGTCATTTCTCCCGCTAAATGAAAACCGTGTTGTTATAAAGCTTAATGCAACC
A_19_P00805702	-1.9814262	down	C1GALT1	Homo sapiens core 1 synthase, glycoprotein-N-acetylgalactosamine 3-beta-galactosyltransferase, 1 (C1GALT1), mRNA [NM_020156]	CACCATTAAGTCAGAAAAATGTATTTTTAAATGTTTCTTGAAGTGCCTTTTGAACATTTT
A_23_P38167	-1.5397124	down	GPRC5C	Homo sapiens G protein-coupled receptor, family C, group 5, member C (GPRC5C), transcript variant 1, mRNA [NM_022036]	TCCAGCCAAATAGTGTTCTCGGGGTGGTGGCTGGGCAGCGCCTATGTTTCTCTGGAGATT
A_24_P302574	-1.8874078	down	OSGEPL1	Homo sapiens O-sialoglycoprotein endopeptidase-like 1 (OSGEPL1), mRNA [NM_022353]	CCTGTAGACATGCTAAGGAAAATCTGCTTAGTATCGAGATCAAGAACTTTCATTCAAAAA
A_23_P163227	-1.9426907	down	CKMT1A	Homo sapiens creatine kinase, mitochondrial 1A (CKMT1A), mRNA [NM_001015001]	CATTAACTCCCCATCGCCAGCTGATGACTCAAGATTCCAAGGAGTTCTGCTCATTCTAAT
A_23_P408996	-1.7678379	down	MBOAT1	Homo sapiens membrane bound O-acyltransferase domain containing 1 (MBOAT1), transcript variant 1, mRNA [NM_001080480]	ATTGGAAAGCAGACATTGAAAGTTTTCTTTTCTATCTTTGTTATGAATGTGCTATGGCCC
A_19_P00810465	-1.8274652	down	KCNA6	Homo sapiens potassium voltage-gated channel, shaker-related subfamily, member 6 (KCNA6), mRNA [NM_002235]	TTGGGGTGAAGCTGTAGGAACAGGGTGAAAGCTGGTGGTGTGAGCAAAGAGACCAGCTAT
A_33_P3376965	-1.6076342	down	CHAC1	Homo sapiens ChaC, cation transport regulator homolog 1 (E. coli) (CHAC1), transcript variant 1, mRNA [NM_024111]	TTCTCCGGCCACAACCTTGAATACTTGCTGCGTCTGGCAGACTTCATGCAGCTCTGTGGG
A_23_P328740	-2.0746915	down	NEURL3	Homo sapiens neuralized E3 ubiquitin protein ligase 3 (NEURL3), transcript variant 2, mRNA [NM_001285486]	CTGAAGATGATTTAAAACATGAAAGTGTATTGTTGTCACTGTGGTAATTTCCTTGCCAGT

## Sheet: GO UP shRNA Ki-67 vs CTRL
GO ACCESSION	GO Term	p-value	corrected p-value	Count in Selection	% Count in Selection	Count in Total	% Count in Total
GO:0001816	cytokine production	0.08105474	1.0	3	1.5706806	93	0.5299447
GO:0002682	regulation of immune system process	1.3614862E-4	0.07313645	25	13.089005	1028	5.8578835
GO:0002684	positive regulation of immune system process	3.0569066E-5	0.029170062	19	9.947644	599	3.4132998
GO:0005488	binding	4.611541E-5	0.034938503	154	80.62827	11888	67.74175
GO:0005539	glycosaminoglycan binding	1.2394194E-4	0.071707256	9	4.712042	174	0.9915095
GO:0005576	extracellular region	4.7641506E-6	0.008422102	45	23.56021	2091	11.915209
GO:0005578	proteinaceous extracellular matrix	3.1765972E-5	0.029170062	13	6.8062825	306	1.7436891
GO:0005615	extracellular space	7.03695E-5	0.047642455	23	12.041884	866	4.934754
GO:0006810|GO:0015457|GO:0015460	transport	0.017330006	1.0	48	25.13089	3293	18.764603
GO:0006811	ion transport	0.17836969	1.0	16	8.376964	1140	6.4960966
GO:0006820|GO:0006822	anion transport	0.046079446	1.0	9	4.712042	430	2.450282
GO:0006869	lipid transport	0.0047036074	0.62623984	7	3.6649215	189	1.0769844
GO:0006887|GO:0016194|GO:0016195	exocytosis	1.2479072E-5	0.015272723	12	6.2827225	239	1.3619009
GO:0006950	response to stress	0.0014109985	0.29608813	48	25.13089	2893	16.48527
GO:0007275	multicellular organismal development	3.397587E-5	0.029170062	67	35.078533	3910	22.280472
GO:0008104	protein localization	0.17116442	1.0	19	9.947644	1379	7.8579974
GO:0009306|GO:0045166|GO:0045731	protein secretion	0.020973803	1.0	3	1.5706806	54	0.30770984
GO:0009605	response to external stimulus	1.1243145E-4	0.067843325	33	17.277487	1532	8.729842
GO:0009611|GO:0002245	response to wounding	5.9879476E-5	0.043956965	25	13.089005	976	5.5615706
GO:0009966|GO:0035466	regulation of signal transduction	1.0826843E-5	0.014354832	43	22.513088	2020	11.510628
GO:0009987|GO:0008151|GO:0050875	cellular process	0.07322107	1.0	151	79.057594	13035	74.27773
GO:0010594	regulation of endothelial cell migration	0.001609251	0.31609404	5	2.617801	78	0.44446978
GO:0010595	positive regulation of endothelial cell migration	1.3831015E-4	0.07313645	5	2.617801	46	0.2621232
GO:0010632	regulation of epithelial cell migration	8.271303E-4	0.21573548	6	3.1413612	101	0.57553136
GO:0010634	positive regulation of epithelial cell migration	6.819859E-5	0.047176432	6	3.1413612	64	0.36469314
GO:0010646	regulation of cell communication	3.07185E-6	0.0068766973	48	25.13089	2262	12.889624
GO:0010876	lipid localization	0.001911131	0.35552183	8	4.188482	206	1.173856
GO:0015031|GO:0015831	protein transport	0.17565802	1.0	15	7.853403	1055	6.011739
GO:0015711	organic anion transport	0.023002785	1.0	8	4.188482	317	1.8063707
GO:0015748	organophosphate ester transport	0.0054894714	0.69871175	4	2.094241	65	0.3703915
GO:0015914	phospholipid transport	0.0014296259	0.29608813	4	2.094241	45	0.25642487
GO:0016043|GO:0044235|GO:0071842	cellular component organization	0.02798685	1.0	55	28.79581	3977	22.66226
GO:0016192|GO:0006899	vesicle-mediated transport	0.042962816	1.0	16	8.376964	918	5.231067
GO:0019220	regulation of phosphate metabolic process	1.8826246E-4	0.09360333	34	17.801046	1643	9.362357
GO:0019222	regulation of metabolic process	1.1625711E-4	0.06850674	86	45.026176	5631	32.0873
GO:0023051	regulation of signaling	2.9594758E-6	0.0068766973	48	25.13089	2259	12.872528
GO:0030334	regulation of cell migration	2.9730509E-6	0.0068766973	17	8.900523	414	2.3591087
GO:0030335	positive regulation of cell migration	1.008887E-5	0.013957968	12	6.2827225	234	1.3334093
GO:0031012	extracellular matrix	7.727728E-7	0.0030737557	17	8.900523	375	2.136874
GO:0031323	regulation of cellular metabolic process	7.2657145E-5	0.048166446	80	41.884815	5060	28.833551
GO:0032101	regulation of response to external stimulus	7.497655E-6	0.011928971	18	9.424084	492	2.8035786
GO:0032103	positive regulation of response to external stimulus	2.8662902E-4	0.121609196	8	4.188482	154	0.87754285
GO:0032501|GO:0050874	multicellular organismal process	4.916346E-7	0.0030737557	93	48.6911	5530	31.511766
GO:0032502	developmental process	9.540944E-5	0.060131367	71	37.172775	4358	24.833324
GO:0032612	interleukin-1 production	1.9636587E-4	0.096130274	3	1.5706806	11	0.06268164
GO:0032879	regulation of localization	1.9311093E-8	3.0724469E-4	43	22.513088	1600	9.117329
GO:0032880	regulation of protein localization	0.002501997	0.4041365	12	6.2827225	426	2.4274888
GO:0032940	secretion by cell	6.65377E-8	7.0575514E-4	19	9.947644	395	2.2508404
GO:0033036	macromolecule localization	0.05643262	1.0	25	13.089005	1650	9.4022455
GO:0034204	lipid translocation	3.692397E-5	0.029170062	4	2.094241	18	0.102569945
GO:0040012	regulation of locomotion	4.3625655E-6	0.008165834	18	9.424084	473	2.6953104
GO:0040017	positive regulation of locomotion	1.7337961E-5	0.019703686	12	6.2827225	247	1.4074876
GO:0042060	wound healing	8.3816085E-5	0.05443006	18	9.424084	591	3.3677132
GO:0043167	ion binding	1.4479946E-4	0.07313645	89	46.59686	5920	33.734116
GO:0044421	extracellular region part	1.5819853E-7	0.0012584906	33	17.277487	1123	6.399225
GO:0044699	single-organism process	0.014810088	1.0	142	74.34555	11729	66.83572
GO:0044707	single-multicellular organism process	7.7226554E-7	0.0030737557	90	47.12042	5331	30.3778
GO:0044763	single-organism cellular process	0.02494546	1.0	127	66.49215	10416	59.35381
GO:0044765	single-organism transport	0.0032043725	0.47205952	43	22.513088	2617	14.912531
GO:0044767	single-organism developmental process	6.58365E-5	0.04655451	71	37.172775	4310	24.559805
GO:0044802	single-organism membrane organization	0.07739031	1.0	9	4.712042	477	2.7181036
GO:0045184	establishment of protein localization	0.20851913	1.0	15	7.853403	1090	6.21118
GO:0045332	phospholipid translocation	3.692397E-5	0.029170062	4	2.094241	18	0.102569945
GO:0046903	secretion	1.706801E-8	3.0724469E-4	22	11.518325	486	2.7693887
GO:0048518|GO:0043119	positive regulation of biological process	3.3962122E-5	0.029170062	64	33.507854	3675	20.941364
GO:0048520	positive regulation of behavior	2.6329099E-5	0.027026001	7	3.6649215	80	0.45586643
GO:0048522|GO:0051242	positive regulation of cellular process	6.0781702E-5	0.043956965	58	30.366491	3278	18.679127
GO:0048583	regulation of response to stimulus	2.4327567E-6	0.0068766973	54	28.272251	2664	15.180352
GO:0048584	positive regulation of response to stimulus	1.2626278E-4	0.07174552	29	15.183246	1277	7.2767677
GO:0048731	system development	9.637485E-5	0.060131367	58	30.366491	3331	18.981138
GO:0048856	anatomical structure development	4.1523407E-4	0.15544672	62	32.46073	3831	21.830303
GO:0050663	cytokine secretion	0.0014608753	0.29608813	3	1.5706806	21	0.11966494
GO:0050701	interleukin-1 secretion	2.4779289E-5	0.02628301	3	1.5706806	6	0.03418998
GO:0050708	regulation of protein secretion	6.0791743E-4	0.19835679	7	3.6649215	132	0.7521796
GO:0050714	positive regulation of protein secretion	3.619141E-5	0.029170062	7	3.6649215	84	0.47865975
GO:0050789|GO:0050791	regulation of biological process	3.450534E-5	0.029170062	128	67.01571	9233	52.612686
GO:0050793	regulation of developmental process	2.8465927E-4	0.121609196	32	16.753927	1542	8.786825
GO:0050794|GO:0051244	regulation of cellular process	3.294021E-5	0.029170062	123	64.3979	8751	49.86609
GO:0050795	regulation of behavior	5.549148E-4	0.19404052	7	3.6649215	130	0.740783
GO:0050878	regulation of body fluid levels	2.0076887E-4	0.09652427	17	8.900523	578	3.293635
GO:0050896|GO:0051869	response to stimulus	3.277493E-4	0.13370717	97	50.78534	6746	38.440937
GO:0050920	regulation of chemotaxis	5.985109E-4	0.19835679	6	3.1413612	95	0.54134136
GO:0050921	positive regulation of chemotaxis	1.1299922E-4	0.067843325	6	3.1413612	70	0.39888313
GO:0051046	regulation of secretion	3.2416315E-6	0.0068766973	18	9.424084	463	2.638327
GO:0051047	positive regulation of secretion	1.2607496E-6	0.0044575254	13	6.8062825	227	1.293521
GO:0051049	regulation of transport	6.6235066E-7	0.0030737557	33	17.277487	1196	6.815203
GO:0051050	positive regulation of transport	3.461665E-6	0.0068845027	19	9.947644	513	2.9232435
GO:0051174	regulation of phosphorus metabolic process	2.184205E-4	0.10220967	34	17.801046	1656	9.436435
GO:0051179	localization	0.057755653	1.0	54	28.272251	4066	23.16941
GO:0051222	positive regulation of protein transport	3.7584927E-5	0.029170062	10	5.235602	186	1.0598894
GO:0051223	regulation of protein transport	7.458858E-4	0.20638683	11	5.7591624	318	1.812069
GO:0051234	establishment of localization	0.014698476	1.0	49	25.65445	3344	19.055218
GO:0051239	regulation of multicellular organismal process	8.244965E-6	0.0124932965	41	21.46597	1863	10.61599
GO:0051240	positive regulation of multicellular organismal process	1.8457476E-5	0.020252649	18	9.424084	526	2.9973218
GO:0051270	regulation of cellular component movement	8.843725E-6	0.012791458	18	9.424084	498	2.8377686
GO:0051272	positive regulation of cellular component movement	1.5350866E-5	0.018091585	12	6.2827225	244	1.3903927
GO:0051641	cellular localization	0.0013596248	0.29608813	32	16.753927	1690	9.630178
GO:0051649	establishment of localization in cell	9.5420703E-4	0.23178153	29	15.183246	1444	8.228389
GO:0060341	regulation of cellular localization	5.5418923E-6	0.009281368	23	12.041884	737	4.1996694
GO:0061024|GO:0016044	membrane organization	0.029679954	1.0	11	5.7591624	527	3.00302
GO:0065007	biological regulation	1.2959537E-4	0.07234727	131	68.58639	9730	55.444756
GO:0065008	regulation of biological quality	1.422239E-4	0.07313645	49	25.65445	2692	15.339906
GO:0070201	regulation of establishment of protein localization	6.761439E-4	0.19979557	12	6.2827225	365	2.0798905
GO:0071702	organic substance transport	0.03996882	1.0	26	13.612565	1671	9.52191
GO:0071840|GO:0071841	cellular component organization or biogenesis	0.030595565	1.0	56	29.319372	4082	23.260584
GO:0080090	regulation of primary metabolic process	2.0323748E-4	0.09652427	79	41.361256	5122	29.186848
GO:0097035	regulation of membrane lipid distribution	1.4380888E-4	0.07313645	4	2.094241	25	0.14245826
GO:0097367	carbohydrate derivative binding	0.0022128832	0.39338064	37	19.371727	2111	12.029176
GO:2000026	regulation of multicellular organismal development	1.3637684E-4	0.07313645	27	14.136126	1154	6.5758734
GO:2000145	regulation of cell motility	1.436282E-6	0.0045703263	18	9.424084	437	2.4901705
GO:2000147	positive regulation of cell motility	1.1964891E-5	0.015229171	12	6.2827225	238	1.3562026
