# Supplementary material for: The cell proliferation antigen Ki-67 organises heterochromatin
Source: eLife. 2016 Mar 7;5:e13722. doi: 10.7554/eLife.13722 (PMC4841783; doi:10.7554/eLife.13722)
Supplement: Figure 8—source data 2. — Table showing statistically significant (corrected p value <0.02, Fold-change >1.5) changes of transcript abundance from Agilent Gene chip analysis of cDNA from control HeLa (pGIPZ-shRNA non silencing control) and HeLa stably silenced (pGIPZ-Ki-67 shRNA) for Ki-67. DOI: http://dx.doi.org/10.7554/eLife.13722.034 [file elife-13722-fig8-data2.xls]

## Sheet: Hela shRNA Ki-67 vs CTRL p<0.02
ProbeName	p (Corr)	p	Regulation	FC	GeneSymbol	Description	Sequence
A_21_P0000509	0.009373809	1.8807106E-4	up	1.4986587	SNAR-G2	Homo sapiens small ILF3/NF90-associated RNA G2 (SNAR-G2), small nuclear RNA [NR_024244]	AGGGGAGGGTTCGAGGGTACGAGTTCGAGGCCAACCGGGTCCACATTGGTTGAGAAAAAA
A_33_P3414202	0.011956697	2.9334088E-4	down	-1.4062035	MBNL3	Homo sapiens muscleblind-like splicing regulator 3 (MBNL3), transcript variant 6, mRNA [NM_001170704]	ATGATGCACGGTGCTACACCTACCACTGTGTCTGCAGCAACAACACCTGCCACCAGCGTT
A_23_P118888	0.0063439975	9.414908E-5	up	1.1787854	PAFAH1B1	Homo sapiens platelet-activating factor acetylhydrolase 1b, regulatory subunit 1 (45kDa) (PAFAH1B1), mRNA [NM_000430]	TGGAGTTCTGTTCCATTCTGGGGGGAAGTTTATTTTGAGTTGTGCTGATGACAAGACCCT
A_21_P0014626	0.0117336875	2.8328833E-4	up	1.3811901	RNF13	Homo sapiens ring finger protein 13 (RNF13), transcript variant 1, mRNA [NM_007282]	TATGGCCTTGTATGAGGGGAGTTTGAATGTTAATAAACATGTTTTCCACTTTAAGATCCA
A_23_P102060	0.006690892	1.0523132E-4	up	1.2634425	SSFA2	Homo sapiens sperm specific antigen 2 (SSFA2), transcript variant 2, mRNA [NM_006751]	GTATCATCCAAATAATGGGGCCTATGACTTGAATGAATAGAAATGAATAAGCTGGTGTTT
A_23_P206140	0.016665123	5.2912976E-4	up	1.3583654	DNAJA4	Homo sapiens DnaJ (Hsp40) homolog, subfamily A, member 4 (DNAJA4), transcript variant 1, mRNA [NM_018602]	TGGGGTGTCGTTTTTGTGCTGTGACTTCCTAATTATTGCTAAAGAACTACTGTTTAGTTG
A_23_P106016	0.0025396058	1.1862405E-5	down	-1.7595705	PRKD1	Homo sapiens protein kinase D1 (PRKD1), mRNA [NM_002742]	CTGTTTGGTGTGTCCCATTGGTGTTGTCATTGTAAACAAACTCTTGAAGAGTCGATTATT
A_24_P355944	0.009307456	1.8391234E-4	up	1.4893901	EFNB2	Homo sapiens ephrin-B2 (EFNB2), mRNA [NM_004093]	TGCGTCTGTTTTGTGTCTGGTGCAGAATATGACAATCTACCAACTGTCCCTTTGTTTGAA
A_23_P101374	0.019920146	7.153177E-4	up	1.540625	CYP2S1	Homo sapiens cytochrome P450, family 2, subfamily S, polypeptide 1 (CYP2S1), mRNA [NM_030622]	AGTCACCCCTTTTTAAGCACCCTGATTCTACCAAATGCAAACACATCTGGGTCTGCGATT
A_33_P3311205	0.0035231872	2.430311E-5	up	1.5115803	PRPF40B	Homo sapiens PRP40 pre-mRNA processing factor 40 homolog B (S. cerevisiae) (PRPF40B), transcript variant 1, mRNA [NM_001031698]	GGAGCTCCAACAGGCAGAGCTCCCTAACCGTTCCCCAGGCTTTGGAATCAAGAAGGAGAA
A_23_P110624	0.019504705	6.891887E-4	down	-2.4737124	CTNND2	Homo sapiens catenin (cadherin-associated protein), delta 2 (CTNND2), mRNA [NM_001332]	TCTAGGCTTCAGGTTGCATTGGGGTTCCTCTGTACAGCAAGATGTTTCTTGCCTTTTGTT
A_23_P104025	0.01823432	6.238747E-4	up	1.1683697	TSEN15	Homo sapiens TSEN15 tRNA splicing endonuclease subunit (TSEN15), transcript variant 1, mRNA [NM_052965]	TTTTAGGTTTTTAAACCTACTGTCTCTGTCATAACTTGTCAACACTGCTGTATGAAGCAC
A_23_P354791	0.009878171	2.0811168E-4	up	1.5046291	NAV2	Homo sapiens neuron navigator 2 (NAV2), transcript variant 1, mRNA [NM_182964]	TGCAAGTACCACAAATGCCCTTACATAATTGGCACAATGAACCAGGCTACCTCTTCGACT
A_32_P231086	0.016624117	5.268449E-4	up	1.554241	GOLGA6L9	Homo sapiens golgin A6 family-like 9 (GOLGA6L9), mRNA [NM_198181]	ATAAATGACTAGGAATGACCTTCAGATAGCGTTTAGCAACTGTAACCAATCTGACAATAA
A_23_P31073	0.005931956	8.417605E-5	up	2.016573	MYB	Homo sapiens v-myb avian myeloblastosis viral oncogene homolog (MYB), transcript variant 2, mRNA [NM_005375]	ATGCAAGATGGCCAGCACTGAACTTTTGAGATATGACGGTGTACTTACTGCCTTGTAGCA
A_23_P10785	0.013683686	3.7270845E-4	up	1.2330738	VTI1A	Homo sapiens vesicle transport through interaction with t-SNAREs 1A (VTI1A), mRNA [NM_145206]	GCAGTGGAAACCGAGCAAATTGGTCAGGAGATGTTGGAAAACCTTAGTCATGACAGAGAA
A_23_P137543	0.010642737	2.443526E-4	down	-1.561232	ZNF362	Homo sapiens zinc finger protein 362 (ZNF362), mRNA [NM_152493]	ACTCCCTGTAAATACGCTGTTATACATACTGTTAACACCCCTTTGCTTTTTCTATGGGAC
A_23_P113161	8.9715177E-4	8.8570783E-7	down	-4.115054	C1orf21	Homo sapiens chromosome 1 open reading frame 21 (C1orf21), mRNA [NM_030806]	TGATTTGACCACCAAGATGTAATGATGATTCTATTCCATTTTGAAAAGGGTCTGAGAAAG
A_23_P112652	0.017697504	5.8457657E-4	up	1.0832815	CNOT10	Homo sapiens CCR4-NOT transcription complex, subunit 10 (CNOT10), transcript variant 1, mRNA [NM_015442]	ATTTACTGGCCATTTTAGTTGTATCACAGCAGAATGAATAAAAGATGGTGAAGGCTGTTA
A_23_P13907	0.0015068345	3.5862718E-6	up	2.2363515	IGF1	Homo sapiens insulin-like growth factor 1 (somatomedin C) (IGF1), transcript variant 4, mRNA [NM_000618]	CAAGTAGAGGGAGTGCAGGAAACAAGAACTACAGGATGTAGGAAGACCCTCCTGAGGAGT
A_23_P118392	0.010083365	2.1681451E-4	up	1.3822283	RASD1	Homo sapiens RAS, dexamethasone-induced 1 (RASD1), transcript variant 1, mRNA [NM_016084]	CTTACCCAGGTGTTTATACTGTGTGTGTGTGAGGTCTTTAAAGTTATTGCTTTATTTGGT
A_24_P388528	0.0018303491	5.3028502E-6	up	3.2260363	ST6GAL1	Homo sapiens ST6 beta-galactosamide alpha-2,6-sialyltranferase 1 (ST6GAL1), transcript variant 1, mRNA [NM_173216]	ATGCAAATTATGATATGGACGTTATCATTGGTCTGGTGAGATGTTTCATATTTGTGACAG
A_23_P120103	0.0016370121	4.4523476E-6	up	6.660331	KCNS3	Homo sapiens potassium voltage-gated channel, delayed-rectifier, subfamily S, member 3 (KCNS3), transcript variant 1, mRNA [NM_002252]	TGACTGAGACGACATGCATGTAAGATCCACAAAATGAGACAATGCATGTAAATCCATGCT
A_23_P111132	0.0121223405	3.0318394E-4	up	1.1022345	HSPA1A	Homo sapiens heat shock 70kDa protein 1A (HSPA1A), mRNA [NM_005345]	GAGCTTCAAGACTTTGCATTTCCTAGTATTTCTGTTTGTCAGTTCTCAATTTCCTGTGTT
A_23_P89431	0.0018740783	5.6880913E-6	down	-1.3762174	CCL2	Homo sapiens chemokine (C-C motif) ligand 2 (CCL2), mRNA [NM_002982]	GAAATTGCTTTTCCTCTTGAACCACAGTTCTACCCCTGGGATGTTTTGAGGGTCTTTGCA
A_23_P500130	0.011465288	2.7522657E-4	up	1.1909772	KANK1	Homo sapiens KN motif and ankyrin repeat domains 1 (KANK1), transcript variant 2, mRNA [NM_153186]	TTTACCGTGTCACATTTACTTTGGTCCTCTATGTATTTAAATGTTTGAAGTGCCTTAGAC
A_32_P72341	0.010642737	2.439843E-4	up	1.9819567	TRIM59	Homo sapiens tripartite motif containing 59 (TRIM59), mRNA [NM_173084]	AGTAGGCCAAGATTAATGTTGGTAAGGGTTTGTAATCTGTAAGAATGCTAAAAACGTAAG
A_23_P106617	8.043037E-4	3.4230305E-7	down	-8.53598	WFDC1	Homo sapiens WAP four-disulfide core domain 1 (WFDC1), transcript variant 1, mRNA [NM_021197]	AAGCAGCTAGGTTGCAAGAACATTCCTCTACTTTCTGCTAAGCCTTGGAAACAGTTGGGA
A_33_P3397865	0.002822251	1.535416E-5	up	2.1249642	TNNT1	Homo sapiens troponin T type 1 (skeletal, slow) (TNNT1), transcript variant 1, mRNA [NM_003283]	GGAAGCCTGGGAGTGTTTGTCCCATCGGTAGCTTGAAATAAACGCTCCCCTCAGACACCC
A_23_P123265	0.014422851	4.0648566E-4	down	-1.1657765	SUMF2	Homo sapiens sulfatase modifying factor 2 (SUMF2), transcript variant 2, mRNA [NM_015411]	ATTGTTTCCTCAAGGCAGAATTTTCCTGGTTCTGTTTTCTCAGCCAGTTGCTGTGGAAGG
A_23_P115922	0.00267133	1.3561154E-5	up	1.5104603	EIF4EBP2	Homo sapiens eukaryotic translation initiation factor 4E binding protein 2 (EIF4EBP2), mRNA [NM_004096]	GTTGATGTCTCAGGAATAAGCTGGATCTCCAATGTTTTGGGGATGCTTTGAGTCTCAAAA
A_23_P110569	0.01823707	6.243282E-4	up	1.3127389	TRIM36	Homo sapiens tripartite motif containing 36 (TRIM36), transcript variant 1, mRNA [NM_018700]	AAGTAGCAAATATCATGGAGAACTTCAGTGTTTAGCAGGCTGTTAATTTCCCATCTATGA
A_23_P83838	0.018338032	6.299531E-4	up	1.7910968	CA8	Homo sapiens carbonic anhydrase VIII (CA8), mRNA [NM_004056]	AGAAAAGGAAACTTTTGAGCTGCACCTTCAGTTTATCCTCAAAGCCTGCGTTGTTTGTCT
A_24_P92367	0.017638965	5.798655E-4	up	1.3871583	YDJC	Homo sapiens YdjC homolog (bacterial) (YDJC), mRNA [NM_001017964]	TGCCACCTCTGGGCTCAGGTCCTCATGCCTCCAAATGGCATCTAGAGTTTGAGCAGCCTT
A_23_P114689	0.012751714	3.317421E-4	down	-1.1511658	ASAP3	Homo sapiens ArfGAP with SH3 domain, ankyrin repeat and PH domain 3 (ASAP3), transcript variant 1, mRNA [NM_017707]	CAATGAGAAAGCAGATACACCTAAGCCATCATCAACCACTAACATCTCAACTTGCCAGTT
A_23_P103511	0.005627837	7.608932E-5	down	-1.6914457	C1orf226	Homo sapiens chromosome 1 open reading frame 226 (C1orf226), transcript variant 2, mRNA [NM_001085375]	GTTCTGAGGAGGAGGAGGAAGATTACAGATCTATTCTGAGTATTTTTTAGAGAGTTAATA
A_23_P32233	0.0073383	1.2335114E-4	up	1.4469056	KLF4	Homo sapiens Kruppel-like factor 4 (gut) (KLF4), mRNA [NM_004235]	CGTTCCAGTGCCAAAAATGCGACCGAGCATTTTCCAGGTCGGACCACCTCGCCTTACACA
A_23_P24104	0.005493793	7.334556E-5	up	1.7695591	PLAU	Homo sapiens plasminogen activator, urokinase (PLAU), transcript variant 1, mRNA [NM_002658]	CTGTGACCAGCACTGTCTCAGTTTCACTTTCACATAGATGTCCCTTTCTTGGCCAGTTAT
A_23_P103256	0.002010198	6.3805182E-6	down	-2.0435784	CFHR3	Homo sapiens complement factor H-related 3 (CFHR3), transcript variant 1, mRNA [NM_021023]	TCAGGAAGTTACTGGGATTACATTCATTGCACACAAAATGGGTGGTCACCAGCAGTACCA
A_23_P122976	0.008222132	1.5070425E-4	down	-1.1454127	GNAI1	Homo sapiens guanine nucleotide binding protein (G protein), alpha inhibiting activity polypeptide 1 (GNAI1), transcript variant 1, mRNA [NM_002069]	AGGTTAGTCTTTCAGTACACGTTACTGGTAAGTAGTTTCCAAGTTACGTGTTGTCACTGG
A_23_P107744	0.0073383	1.2342469E-4	up	1.3863024	S1PR5	Homo sapiens sphingosine-1-phosphate receptor 5 (S1PR5), transcript variant 1, mRNA [NM_030760]	ATAGAAGCTTCTAAGCAGAAGAGGGACTTGCCCTAATTCAGGTGATCACAGGTGTCTTGT
A_23_P2683	0.0035578406	2.4734461E-5	up	1.2454438	RPAP3	Homo sapiens RNA polymerase II associated protein 3 (RPAP3), transcript variant 1, mRNA [NM_024604]	AAGGTTTGATATGGCAGTGATGTTTATGTCAGAAACAGAGAAAAAGATTGCACGTGCATT
A_23_P71530	0.010822974	2.508488E-4	down	-1.3012244	TNFRSF11B	Homo sapiens tumor necrosis factor receptor superfamily, member 11b (TNFRSF11B), mRNA [NM_002546]	ACGCACTAAAGCACTCAAAGACGTACCACTTTCCCAAAACTGTCACTCAGAGTCTAAAGA
A_23_P108673	0.009602833	1.9655109E-4	up	1.9272916	EVA1A	Homo sapiens eva-1 homolog A (C. elegans) (EVA1A), transcript variant 2, mRNA [NM_032181]	CCTCAGGGATTAAAATCCTACTTTTTAGTGTAGTTCCCACCTCATTCATGAAAATGAATA
A_23_P11685	6.9015485E-4	2.4940854E-7	down	-2.2444074	PLA2G4A	Homo sapiens phospholipase A2, group IVA (cytosolic, calcium-dependent) (PLA2G4A), mRNA [NM_024420]	GAAATGGCAGCAGTTTCTGATGCTGAGGCAGTTTGCAATCCCATGACAACTGGATTTAAA
A_23_P138507	0.008855079	1.6806366E-4	up	1.1286852	CDK1	Homo sapiens cyclin-dependent kinase 1 (CDK1), transcript variant 1, mRNA [NM_001786]	CCCATGTCAAAAACTTGGATGAAAATGGCTTGGATTTGCTCTCGAAAATGTTAATCTATG
A_23_P122863	0.012065918	3.0000517E-4	up	1.4156715	GRB10	Homo sapiens growth factor receptor-bound protein 10 (GRB10), transcript variant 4, mRNA [NM_001001555]	GAAAATAAACTGGAATGATCATCTATGGCTTGGGCCGCTTAGGAACAAGAACCGGAGAGA
A_24_P928052	0.0026330084	1.2973296E-5	down	-2.2177832	NRP1	Homo sapiens neuropilin 1 (NRP1), transcript variant 1, mRNA [NM_003873]	GTTGATATAATCCTACCAGAAGGAAAGCACTAAGAAACACTCGTTTGTTGTTTTTAAAGG
A_23_P166910	0.016085858	4.9394666E-4	up	1.2448171	DNAJC13	Homo sapiens DnaJ (Hsp40) homolog, subfamily C, member 13 (DNAJC13), mRNA [NM_015268]	AAGTCCACATTCCTCCAGCTGATACGTTGAAGCAAACTCTTACTGCCTTTCTCCTGGTTT
A_23_P100499	0.0050779954	6.118425E-5	up	1.3031083	ROGDI	Homo sapiens rogdi homolog (Drosophila) (ROGDI), transcript variant 1, mRNA [NM_024589]	CAGCAGATCCAGGATGCCAGAAACCATGTGAGCCAAGCCATTTACCTGCTTACCAGCCGG
A_23_P145529	0.0020259365	6.548288E-6	up	1.6802305	PKIB	Homo sapiens protein kinase (cAMP-dependent, catalytic) inhibitor beta (PKIB), transcript variant 1, mRNA [NM_181795]	ATGAAGGCTCATAATCTATCAAGAGTGCTGAATTTCTGCATGTTGAAAGACTTAGTGGTT
A_32_P176911	0.011106649	2.5961266E-4	up	1.8383061	LINC00239	Homo sapiens long intergenic non-protein coding RNA 239 (LINC00239), long non-coding RNA [NR_026774]	GGACTCTGGAGATAAAACCTCATTGCAAGGCTACCTTTGCCACTGTATCTTAGCAGCTTT
A_24_P383523	0.014982454	4.317063E-4	up	1.7447013	SAMD4A	Homo sapiens sterile alpha motif domain containing 4A (SAMD4A), transcript variant 1, mRNA [NM_015589]	CCATCTTCAGGGTTGCACAGAATCCTCCAAGATACTTTGCAGCCTTTTTTCCCCCTGGTC
A_33_P3703501	0.010523049	2.3974941E-4	up	1.2995044	GALNT10	Homo sapiens UDP-N-acetyl-alpha-D-galactosamine:polypeptide N-acetylgalactosaminyltransferase 10 (GalNAc-T10) (GALNT10), mRNA [NM_198321]	GAATTGAGATTCATCATCAAAGAGCAATGCAGCGTCGTTAAAATAAAAACTGTGCCTTTT
A_23_P113613	0.0014632412	3.2249031E-6	up	6.0419984	CDCP1	Homo sapiens CUB domain containing protein 1 (CDCP1), transcript variant 1, mRNA [NM_022842]	CTTAATTTGTGGATGATACAGAAAGCCAGGCTTTGGGATACAAGTTCTTTCCTCTTCATT
A_33_P3227944	0.011964144	2.9451144E-4	up	2.6886375	CRHR1-IT1	Homo sapiens CRHR1 intronic transcript 1 (non-protein coding) (CRHR1-IT1), transcript variant 2, long non-coding RNA [NR_026906]	CACTGTGCTAAACGCCTTCCATGTATTCATCTCATTAGTAAACATTTCTGAAACTATTCT
A_23_P118536	0.013462764	3.6364206E-4	up	1.2740391	SLFN12	Homo sapiens schlafen family member 12 (SLFN12), mRNA [NM_018042]	GAGACCAGTTTTCCTTTGCAGAAAATCTATACCAGATAATCGGTATAGATTGCTTTCAGA
A_23_P144916	0.009749201	2.0098276E-4	down	-1.9104133	GFPT2	Homo sapiens glutamine-fructose-6-phosphate transaminase 2 (GFPT2), mRNA [NM_005110]	CATAGTAAAACAGCTTGAAATATCCCATGCAAGAGAGTAGTTTCAAGTGGGCAACTCTGC
A_23_P251342	0.002822251	1.5574416E-5	up	1.4663805	GSK3B	Homo sapiens glycogen synthase kinase 3 beta (GSK3B), transcript variant 1, mRNA [NM_002093]	CTGGAGTATACACCAACTGCCCGACTAACACCACTGGAAGCTTGTGCACATTCATTTTTT
A_23_P54556	0.006338683	9.394528E-5	down	-1.2608631	MKL2	Homo sapiens MKL/myocardin-like 2 (MKL2), mRNA [NM_014048]	TGGCAGTATTGTAGCTGATCGGGAAATGTTTGATATCTCAGCAATTTTGCATTTTTGTGT
A_23_P1014	0.004899363	5.4749577E-5	down	-1.1076875	LINC00467	Homo sapiens long intergenic non-protein coding RNA 467 (LINC00467), long non-coding RNA [NR_026761]	CCAGCACTGTGAAGCCTACAAAAACATTGATGCGCTGGCTTGGGGATTTGAATTTGAACA
A_24_P921366	0.015589852	4.6487802E-4	down	-1.4056644	CALD1	Homo sapiens caldesmon 1 (CALD1), transcript variant 1, mRNA [NM_033138]	TTCCTTGTTTACTGGTTTGACTATAATTCTCTGTTATCTTTACGAGGTAAAACTGCAAGC
A_24_P250922	0.008000227	1.437753E-4	down	-2.8579106	PTGS2	Homo sapiens prostaglandin-endoperoxide synthase 2 (prostaglandin G/H synthase and cyclooxygenase) (PTGS2), mRNA [NM_000963]	TGAGATATTTAAGGTTGAATGTTTGTCCTTAGGATAGGCCTATGTGCTAGCCCACAAAGA
A_23_P40039	0.0125951255	3.2380264E-4	down	-1.1068175	AMMECR1L	Homo sapiens AMMECR1-like (AMMECR1L), transcript variant 1, mRNA [NM_031445]	CTAGGGAGCTATGTGTTCTTTTTGTTCATTTCGTTCTTACTTCCCTGAAGCAAGAGACTA
A_23_P129174	0.012532798	3.2148996E-4	up	1.2077835	LRRC49	Homo sapiens leucine rich repeat containing 49 (LRRC49), transcript variant 2, mRNA [NM_017691]	TTGGTTCTTGCTTTGATTGGTGCCCTGCTATAGCCCAAAGCACGTAGTATTTGCTGATGA
A_21_P0008919	0.009871443	2.0546129E-4	down	-1.1667068	XLOC_011682	BROAD Institute lincRNA (XLOC_011682), lincRNA [TCONS_00024360]	TAGGGGCCATAAAAAATGGTTGTTTTGAGCTGGGTACAGTGGCTCACTCCTGTAATTCCA
A_33_P3262541	0.018890828	6.5713376E-4	up	1.3129673	ADAMTSL2	Homo sapiens ADAMTS-like 2 (ADAMTSL2), transcript variant 1, mRNA [NM_014694]	ATCAAAGTGAACCTCTGCGGGCACTGGTACTACAGCAAGGCGTGCTGCCGCTCCTGCAGG
A_23_P134454	0.0020907004	7.4670425E-6	up	1.5266893	CAV1	Homo sapiens caveolin 1, caveolae protein, 22kDa (CAV1), transcript variant 1, mRNA [NM_001753]	ATTCCTCCTGCTCATATTGTGATTCTCACTTTGGGGACTTTTCTTAAACCTTCAGTTATG
A_23_P119196	0.011406713	2.7258284E-4	down	-1.2911308	KLF2	Homo sapiens Kruppel-like factor 2 (KLF2), mRNA [NM_016270]	GAGACAGGTGGGCATTTTTGGGCTACCTGGTTCGTTTTTATAAGATTTTGCTGGGTTGGT
A_23_P113351	0.0013883632	2.4900185E-6	down	-9.860544	SPARCL1	Homo sapiens SPARC-like 1 (hevin) (SPARCL1), transcript variant 2, mRNA [NM_004684]	TGTTCATAATATCATGTGCACTTCAAGAAAATGGAATGCTACTCTTTTGTGGTTTACGTG
A_32_P194072	0.0051177577	6.263678E-5	down	-1.2884412	TECPR1	Homo sapiens tectonin beta-propeller repeat containing 1 (TECPR1), mRNA [NM_015395]	ATGGGGCTCAGGGCCTCTTTACCATGTGCAGTGACCATTTCTCAGAGCAGGACTTGCAAA
A_24_P795594	0.0056827203	7.716735E-5	down	-1.4196117	ALG9	Homo sapiens ALG9, alpha-1,2-mannosyltransferase (ALG9), transcript variant 3, mRNA [NM_001077691]	AAGCATATTAAAGCTCACGTGTTAATCAGTGCATTCTTATGCTCCTACATTAAATGCCTT
A_21_P0013271	0.01413036	3.9298894E-4	up	2.2170806	SMKR1	Homo sapiens small lysine-rich protein 1 (SMKR1), mRNA [NM_001195243]	ACTTCCTCTGTTATGCCAGATATGGTTAGCCACTTTGGTTTTTTAGGAGCTATAGGATGG
A_24_P77676	0.017138144	5.5495714E-4	up	1.1218269	HSPA9	Homo sapiens heat shock 70kDa protein 9 (mortalin) (HSPA9), mRNA [NM_004134]	CATTTAATGGACAGTGATTCTAACAGTATAAAGTTCACAATATTCTATGTCCCTAGCCTG
A_33_P3262833	0.0033736592	2.1431952E-5	up	2.484562	GOLGA8EP	Homo sapiens golgin A8 family, member E, pseudogene (GOLGA8EP), non-coding RNA [NR_033350]	TCAGCCAAGTATTGGTATTCTTCCTCATTCGGTATAAGGCAGCTTTCAATTTGCTTAGAA
A_23_P122775	0.008418814	1.5613443E-4	up	1.1314001	RTN4IP1	Homo sapiens reticulon 4 interacting protein 1 (RTN4IP1), mRNA [NM_032730]	AAAGGAGTCCATTATCGCTGGGCATTTTTCATGGCCAGTGGCCCATGTTTAGATGACATT
A_33_P3330109	0.0039074826	3.2548025E-5	up	1.4565487	HLA-C	Homo sapiens major histocompatibility complex, class I, C (HLA-C), transcript variant 2, mRNA [NM_001243042]	GAGCTGCAACTTCTTACTTCCCTAATGAAGTTAAGAACCTGAATATAAATTTGTGTTCTC
A_19_P00807643	0.015328658	4.5020288E-4	down	-2.9414356	CYP1B1-AS1	Homo sapiens CYP1B1 antisense RNA 1 (CYP1B1-AS1), long non-coding RNA [NR_027252]	TACTTCACCGATGTCAGCATTTTACCCAGAGCCATTCCAAGGTGACCATAACTCACTTAA
A_24_P379233	0.010473485	2.3758807E-4	up	5.52748	GJB3	Homo sapiens gap junction protein, beta 3, 31kDa (GJB3), transcript variant 1, mRNA [NM_024009]	ACCCCACTCTGAGTTCACTAAGTTATGCAACTTTCGTTTTGGCAGATATTTTTTGACACT
A_33_P3252915	0.009055282	1.7579086E-4	up	1.3441187	RNF7	Homo sapiens ring finger protein 7 (RNF7), transcript variant 5, non-coding RNA [NR_037702]	ATTGGTCCGAGGCCCTGAACCTAATAAATGCCAGTGAAATGGGATTTGACTGTAGATCTG
A_33_P3408320	0.0039074826	3.2566295E-5	up	1.8790027	CERS1	Homo sapiens ceramide synthase 1 (CERS1), transcript variant 2, mRNA [NM_198207]	CCATCAGATTCGCCTTGGGTGTAGATGAAACAGAAATAAAAGAATCAAAGACGACTCAAG
A_23_P121716	0.0013492644	2.2071572E-6	up	1.258394	ANXA3	Homo sapiens annexin A3 (ANXA3), mRNA [NM_005139]	TGGACATTCGAACAGAGTTCAAGAAGCATTATGGCTATTCCCTATATTCAGCAATTAAAT
A_24_P418044	0.019784823	7.0838945E-4	up	1.3716965	HLA-J	Homo sapiens major histocompatibility complex, class I, J (pseudogene) (HLA-J), non-coding RNA [NR_024240]	ACTTCTCTTTCTGCAAAGGCATCTGAATGTGTCTGTGTCCCTATAGGCATAATGTGAGGT
A_33_P3276062	0.010114946	2.1789229E-4	down	-1.7441593			ACGGGGAGAGTTCAGAACACCGTGGATATCTTGGAAATGGCACCGATGGGGAGAGCTTAG
A_23_P144054	0.005001551	5.845444E-5	up	1.4662825	PRKCD	Homo sapiens protein kinase C, delta (PRKCD), transcript variant 1, mRNA [NM_006254]	GTCTGCATTCGCTGGCTTCTCCTTTGTGAACCCCAAATTCGAGCACCTCCTGGAAGATTG
A_23_P103099	0.016594172	5.2434753E-4	down	-1.1931828	RBFOX2	Homo sapiens RNA binding protein, fox-1 homolog (C. elegans) 2 (RBFOX2), transcript variant 1, mRNA [NM_001031695]	CCTAGATGTAGAAATAATCTTTAATGAACGTGGCTCTAAGGGATTCGGGTTCGTAACTTT
A_33_P3321657	0.018173287	6.1927934E-4	down	-1.3685935	HSPG2	Homo sapiens heparan sulfate proteoglycan 2 (HSPG2), mRNA [NM_005529]	TAGAAGGGACCCTCCTGTGGTCTTTGTCTTGATTTTTCTTAATAAACGGTGCTATCCCCG
A_23_P122906	0.009842525	2.0365676E-4	down	-1.4577183	AUTS2	Homo sapiens autism susceptibility candidate 2 (AUTS2), transcript variant 1, mRNA [NM_015570]	AGTTCCATTTGGTCTTCTAGTATATTAAAGTGCTATCTGACGTTGTTATCCTGTTTTTGC
A_23_P115919	0.0128173735	3.3478034E-4	down	-1.4823517	PHYH	Homo sapiens phytanoyl-CoA 2-hydroxylase (PHYH), transcript variant 2, mRNA [NM_001037537]	TTTCGAGCTCGACTTGTGAAAGGAGAAAGAACCAATCTTTGAAATAGCCATCTGCTATAA
A_23_P211522	0.017567407	5.768206E-4	up	1.7534363	SYNGR1	Homo sapiens synaptogyrin 1 (SYNGR1), transcript variant 1c, mRNA [NM_145738]	AGGACCGCAAGAAAGCCGTCCTGTCCGACATCGGTGTCTCGGCCTTCTGGGCTTTCCTCT
A_23_P207400	0.010285046	2.3067821E-4	up	1.1177793	BRCA1	Homo sapiens breast cancer 1, early onset (BRCA1), transcript variant 2, mRNA [NM_007300]	AAGTGTTTTTCATAAACCCATTATCCAGGACTGTTTATAGCTGTTGGAAGGACTAGGTCT
A_23_P201047	0.018943341	6.5992837E-4	up	1.3490415	THBS3	Homo sapiens thrombospondin 3 (THBS3), transcript variant 1, mRNA [NM_007112]	GGGGCGTCTTGGTGTATTCTGCTTCTCCCAAGAAAACATAATTTGGTCCAATCTCCAGTA
A_23_P112220	0.0066274516	1.038417E-4	up	1.2887288	INSL4	Homo sapiens insulin-like 4 (placenta) (INSL4), mRNA [NM_002195]	GGTACGACATCAGAATTCATTCCTAATTTGTCACCAGAGCTGAAGAAACCACTGTCTGAA
A_23_P259442	0.002060766	7.1080776E-6	down	-2.4896748	CPE	Homo sapiens carboxypeptidase E (CPE), mRNA [NM_001873]	TCTTGTGCTGACTAACTATAAGCATGATCTTGTTAATGCATTTTTGATGGGAAGAAAAGG
A_23_P109768	0.0031768456	1.9798426E-5	up	1.2811733	RNF7	Homo sapiens ring finger protein 7 (RNF7), transcript variant 1, mRNA [NM_014245]	TGGGACTCATCAAAGCCTTGGTTTAGCATTTTGTCAGTTTTATCTTCAGAAATTCTCTGC
A_23_P92281	0.0019605006	6.1049504E-6	up	1.4903228	GTPBP8	Homo sapiens GTP-binding protein 8 (putative) (GTPBP8), transcript variant 1, mRNA [NM_014170]	TTGTTTCCTGTAAGTGCTGTGACCTTTTCTGGAATCCACCTGTTGAGATGCTTTATAGCC
A_21_P0007443	0.0050034127	5.864999E-5	up	7.389162	XLOC_009231	BROAD Institute lincRNA (XLOC_009231), lincRNA [TCONS_00019958]	GAGGTGATGAATGATGACCCTTATTTCATTTCTCTTTTATTCTTGGTTAGCCTGGTTAGA
A_23_P103617	0.0015354342	3.8217686E-6	up	4.142236	ANXA9	Homo sapiens annexin A9 (ANXA9), mRNA [NM_003568]	TTCTTTAAAATCCCTTAATTTTCCCATCTCAAAATTATATCTGTACCTGGGTCATCCAGC
A_23_P121082	0.017697504	5.857443E-4	up	1.1184548	GBE1	Homo sapiens glucan (1,4-alpha-), branching enzyme 1 (GBE1), mRNA [NM_000158]	TTGTCCACTAAGTATCTTGTTAAATGCCAGTATCTCAGTCTTTCTGAAGCCCTGAAATGG
A_23_P12343	0.010263095	2.2818756E-4	down	-1.2347072	GSTM3	Homo sapiens glutathione S-transferase mu 3 (brain) (GSTM3), transcript variant 1, mRNA [NM_000849]	AGCTTGTTTTGTTTCATCCTGTCCGTAAGGGGTCAGCGCTCTTGCTTTGCTCTTTTCAAT
A_23_P115703	0.018048454	6.132469E-4	up	1.2414964	PCGF6	Homo sapiens polycomb group ring finger 6 (PCGF6), transcript variant 1, mRNA [NM_001011663]	GATCTGTGCCATAAAATTTCAGTGTAATAAGACTTCTTCAATACATCTTCCAATAAGGGG
A_24_P81841	0.0031363259	1.9347444E-5	down	-1.3995427	CDKN1B	Homo sapiens cyclin-dependent kinase inhibitor 1B (p27, Kip1) (CDKN1B), mRNA [NM_004064]	AGCACACTTGTAGGATAAGTGAAATGGATACTACATCTTTAAACAGTATTTCATTGCCTG
A_23_P256231	0.0050838315	6.192097E-5	down	-1.2316113	FBXO30	Homo sapiens F-box protein 30 (FBXO30), mRNA [NM_032145]	GCCTTTTAAAGTTTTGCTGAAGAATGTGTCTGTGGTTAGGATAGCACAAGCATTAACTTT
A_23_P383258	0.0024237537	1.0630355E-5	down	-5.0389733	GDA	Homo sapiens guanine deaminase (GDA), transcript variant 2, mRNA [NM_004293]	TGTTTTATGGGGACTTTTTTGGTGATATTTCTGAGGCTGTTATCCAGAAGTTCCTCTATC
A_23_P137586	0.012058475	2.9861747E-4	down	-1.2522699	GMEB1	Homo sapiens glucocorticoid modulatory element binding protein 1 (GMEB1), transcript variant 1, mRNA [NM_006582]	GGGCAAAGCAGTCATCTTGGAGACAGAGCTGAGGACTGAGGAGAAAGTTGTGGCTGAGAT
A_23_P205713	0.0014145512	2.8234888E-6	up	3.1909506	STXBP6	Homo sapiens syntaxin binding protein 6 (amisyn) (STXBP6), mRNA [NM_014178]	GCACAAGCTTGCCATGAAGCACAAATGTTGAGAAACTGCCTATCCTGGTGACTCTTCTTA
A_23_P112289	0.002010198	6.4578E-6	down	-1.9940227	TMOD1	Homo sapiens tropomodulin 1 (TMOD1), transcript variant 1, mRNA [NM_003275]	GGGCAAATGGCTTATGTGAGGTAAGACACTAGAGGGATAAATTTCCAGATCAACATGGCT
A_24_P331704	0.0021072412	7.764086E-6	up	1.8538852	KRT80	Homo sapiens keratin 80 (KRT80), transcript variant 1, mRNA [NM_182507]	CCAAGGGAGCAAATCCTCAGTGGGGATACAAGACATATAAAGTATATATTATTTTTTCAT
A_23_P1145	0.0053600185	6.8876645E-5	down	-1.1697037	MTPAP	Homo sapiens mitochondrial poly(A) polymerase (MTPAP), mRNA [NM_018109]	GCTGCTACATTGTGTAAAGAACTGGGCTTAGCCTATCAAATGGTCTGTGGACTTACTTGG
A_33_P3357199	0.008090207	1.4637281E-4	up	1.426722	SH2D6	Homo sapiens SH2 domain containing 6 (SH2D6), mRNA [NM_198482]	ACCCTGAGAGGGACTGGCCTACCTTGCACAAGTTCACATTCAATAAACATTTGTTGATTG
A_21_P0011381	0.012974241	3.4262933E-4	up	1.2795627	GOLGA6L4	Homo sapiens golgin A6 family-like 4 (GOLGA6L4), mRNA [NM_001267536]	AACAACGAGAACAAGAGCACACTGCAGTTGGAGCAGCAAGTAAAGGAGCTGAAGAAGTCG
A_23_P49816	0.0018355191	5.4625316E-6	up	1.7557229	ADAP2	Homo sapiens ArfGAP with dual PH domains 2 (ADAP2), mRNA [NM_018404]	AATGGAGGCATTGCAATGAAAAGGCACCCACAGCATCATGCAAGTGGCATCTTGTAAAAA
A_33_P3381483	0.007444108	1.2734752E-4	down	-1.3274584	ZNF331	Homo sapiens zinc finger protein 331 (ZNF331), transcript variant 3, mRNA [NM_001253798]	GCTTGATTTAATCCTTCCACATTGTATACATGTATCAGAACATCACATTGTACTCCATCA
A_23_P114414	0.0103599345	2.339913E-4	up	1.2098525	LONRF3	Homo sapiens LON peptidase N-terminal domain and ring finger 3 (LONRF3), transcript variant 1, mRNA [NM_001031855]	CACCTTCCCCACTGCCGTCGGGGGGAGTCTTCTTGTAAATATATCTAATTGCAATAACAT
A_23_P121141	0.009766843	2.0153895E-4	up	1.2653241	ASTE1	Homo sapiens asteroid homolog 1 (Drosophila) (ASTE1), mRNA [NM_014065]	TTGATGCAGTAGAACTGGCCAAGGATCATTCTGACTTAAGCAGATTGACTGAGCTCTCCT
A_23_P161424	0.011366815	2.6974297E-4	down	-1.6147819	PLXDC2	Homo sapiens plexin domain containing 2 (PLXDC2), transcript variant 1, mRNA [NM_032812]	GAAGGCTTTATTGTATCAGAGCAGTGCTAAAATTTCTAGGACAGAACAACACCAGTACTG
A_23_P101871	0.01340334	3.597893E-4	up	1.4280444	FBXO17	Homo sapiens F-box protein 17 (FBXO17), transcript variant 2, mRNA [NM_024907]	CCTGCAAATTTTCTTCTCCTGCAAGGATCTCGGTGGACTCAGTCACAAAACAAAGGCTAA
A_23_P104798	0.0033736592	2.1975118E-5	up	1.4607971	IL18	Homo sapiens interleukin 18 (interferon-gamma-inducing factor) (IL18), transcript variant 1, mRNA [NM_001562]	TTGAATGACCAAGTTCTCTTCATTGACCAAGGAAATCGGCCTCTATTTGAAGATATGACT
A_23_P381102	0.0078880405	1.392949E-4	up	1.4492121	CCDC74B	Homo sapiens coiled-coil domain containing 74B (CCDC74B), transcript variant 1, mRNA [NM_207310]	GGCTAAATTCCAAGATAGATAACACTCAAGATAGATAAAGTACTTGATCTCCAAACTGAC
A_23_P256205	0.004162429	3.9951574E-5	down	-2.1002324	ABLIM3	Homo sapiens actin binding LIM protein family, member 3 (ABLIM3), mRNA [NM_014945]	TTTCTGGAAGAGATTGCATCTGAGGAAATTCAGGAAGGATCTTTGTAGATTGGGGGGAGA
A_23_P115885	0.0063972296	9.538968E-5	up	1.3738523	MINPP1	Homo sapiens multiple inositol-polyphosphate phosphatase 1 (MINPP1), transcript variant 1, mRNA [NM_004897]	TGTACCTTATGCCTCGAACCTGATATTTGTGCTTTACCACTGTGAAAATGCTAAGACTCC
A_23_P422071	0.017710658	5.868353E-4	down	-1.5141417	B3GALT4	Homo sapiens UDP-Gal:betaGlcNAc beta 1,3-galactosyltransferase, polypeptide 4 (B3GALT4), mRNA [NM_003782]	TTCTCTCAAGCTAGGGCAGAAGAGGGTGTCAAGCTCCTCAATAAACTTGTCTCCACTTAA
A_24_P80204	0.0041842186	4.024318E-5	up	2.0188448	MALL	Homo sapiens mal, T-cell differentiation protein-like (MALL), mRNA [NM_005434]	TCACCAGGACCTCAACGGGCAAAGTTGTGCACACTAAAATATCAAATCAAGGTGCTTGGT
A_23_P10442	0.0021872197	8.481952E-6	down	-1.3314661	OSBPL1A	Homo sapiens oxysterol binding protein-like 1A (OSBPL1A), transcript variant 2, mRNA [NM_080597]	GCACATTCATCTTAAATCTTATAGTATTTATCCACCCAAACCCCAGACTGAGATACTGCT
A_23_P161297	0.006294335	9.266773E-5	up	14.2163315	OGDHL	Homo sapiens oxoglutarate dehydrogenase-like (OGDHL), transcript variant 1, mRNA [NM_018245]	GTTCAGCAGTAACAGCCAGGTGAAGCGAACCTGCTGGGTGATTTGTTTGCGCTCTGTTTT
A_23_P112874	0.0021872197	8.5480315E-6	down	-1.8044128	GPC5	Homo sapiens glypican 5 (GPC5), mRNA [NM_004466]	GAAGAACCTTGATAATTTTGACCCACTGTAACTTAGCCACTGATGAACCTTAAAGCTGAG
A_23_P110076	0.014446982	4.0858943E-4	up	1.2614733	WDR53	Homo sapiens WD repeat domain 53 (WDR53), mRNA [NM_182627]	AGAATCCTATTTGCTGCTTACTGGAGGGAATGATGGGAAGATCACGTTGTGGGATGCAAA
A_21_P0014115	0.0049071717	5.561579E-5	up	1.6391442		Homo sapiens cDNA FLJ26015 fis, clone MPC03596. [AK129526]	CTACTTTTGTAAGGTCCTGTTTCTTTGGCTACATCTGATTACAGTAAACATAGGAAGTTT
A_23_P33607	0.011366815	2.7014935E-4	up	1.1737337	TEFM	Homo sapiens transcription elongation factor, mitochondrial (TEFM), mRNA [NM_024683]	ATATCTATCGTTTTTGGTACTCGAAGAATTGCCTGGGCTCACCTTGATCGTAAGTTGACA
A_33_P3348519	0.011346113	2.678934E-4	down	-1.0907843	LOC100128494	Homo sapiens uncharacterized LOC100128494 (LOC100128494), long non-coding RNA [NR_104178]	TAACACCCACCTTAAAGGAAAGGTCTCCATTCTCCTCCGAAAGCTGGTTGATTTTGCGAT
A_23_P101351	0.00208786	7.3245246E-6	down	-1.515382	ZNF426	Homo sapiens zinc finger protein 426 (ZNF426), mRNA [NM_024106]	AATAAATGTGGGAAAGCTCTCATTTGTTCCAGTTCACTTTAAAGACATGAATGAACTCAC
A_23_P108751	0.012408272	3.151439E-4	down	-1.3430523	FHL2	Homo sapiens four and a half LIM domains 2 (FHL2), transcript variant 5, mRNA [NM_001039492]	TTTACAGCTCTGTAACCTCCCGTTGCGTCAAGTCTAAACCAAGATTATGTGACTTGCAAT
A_33_P3263890	0.005856473	8.206611E-5	down	-6.32323	PRRX1	Homo sapiens paired related homeobox 1 (PRRX1), transcript variant pmx-1a, mRNA [NM_006902]	GATTTGTAGGGTACTTGGCAGGTTAAATTAAACCAGAAGAGGTGACTTAATAAAAAAGGG
A_33_P3243449	0.002976667	1.7893206E-5	up	6.5956364	CD70	Homo sapiens CD70 molecule (CD70), mRNA [NM_001252]	TGGGGCGTAGTGGTGGCAGGACAAGAGAAGGCATTGAGCTTTTTCTTTCATTTTCCTATT
A_23_P201551	0.0025603706	1.2378236E-5	down	-1.5583762	VAV3	Homo sapiens vav 3 guanine nucleotide exchange factor (VAV3), transcript variant 1, mRNA [NM_006113]	CATATACTTTGTCTTGCCTGTATGCAGCCCTTGTGTAATATGGTGAATTAGAGTGGTATT
A_21_P0011363	0.016213275	5.0232105E-4	up	1.6663377		Homo sapiens family with sequence similarity 7, member A1, mRNA (cDNA clone IMAGE:6171114). [BC070492]	CCTTTGCCTTAAGACCTAAAGAGGTTTTGGAACATCAGCAAGCATCCATCTCGAGGTAAA
A_24_P194881	0.013460011	3.626824E-4	up	1.4592472	SHANK3	Homo sapiens SH3 and multiple ankyrin repeat domains 3 (SHANK3), mRNA [NM_033517]	GTTTGGAGTCTGGACTAAGCTCCATCCACGTCACTCACAAGTTTCTGTTTATATTTCTAG
A_23_P139509	0.0049071717	5.5222703E-5	down	-1.1664783	ERGIC2	Homo sapiens ERGIC and golgi 2 (ERGIC2), mRNA [NM_016570]	AGAAAGGGAACGTATCATTAACCATGCTGCAGGCAGCCATGGAGTCTCTGGGATATTTAT
A_23_P35912	0.0049071717	5.5253146E-5	down	-1.6981965	CASP4	Homo sapiens caspase 4, apoptosis-related cysteine peptidase (CASP4), transcript variant gamma, mRNA [NM_033306]	GCCAAAGCTCAAATGCCCACCATAGAACGACTGTCCATGACAAGATATTTCTACCTCTTT
A_23_P111228	0.015583626	4.6438523E-4	up	1.1091986	COQ3	Homo sapiens coenzyme Q3 methyltransferase (COQ3), mRNA [NM_017421]	AACATGTGATTGATCTAGAAACATTTTTACAGTGCTGCTGTCAAGTGTTAAAACCCGGTG
A_23_P57709	0.009889119	2.0909838E-4	up	1.5822481	PCOLCE2	Homo sapiens procollagen C-endopeptidase enhancer 2 (PCOLCE2), mRNA [NM_013363]	TATCTGATTGGAAACCTGCCGACTTAGTGCGGTGATAGGAAGCTAAAAGTGTCAAGCGTT
A_23_P19590	0.014086576	3.911781E-4	up	1.3674926	EZR	Homo sapiens ezrin (EZR), transcript variant 1, mRNA [NM_003379]	GATTATTCTCGAATCACCTCCTGTGTTGTGCTGGGAGCAGGACTGATTGAATTACGGAAA
A_23_P77493	8.9715177E-4	9.378667E-7	up	1.5108024	TUBB3	Homo sapiens tubulin, beta 3 class III (TUBB3), transcript variant 1, mRNA [NM_006086]	TTGTTTTTTACTGGTTTGTGTTTATATTTTCGGGGATACTTAATAAATCTATTGCTGTCA
A_23_P104438	0.004000943	3.5357752E-5	up	3.2785838	MYPN	Homo sapiens myopalladin (MYPN), transcript variant 1, mRNA [NM_032578]	AAAGAAATCCTCTGTGGGGTCACTTTAAAAACTACTAGCTTCAACTACCACTTACAAAAT
A_23_P113111	0.008507169	1.5877903E-4	up	2.0000966	AR	Homo sapiens androgen receptor (AR), transcript variant 1, mRNA [NM_000044]	AGCCACACAAACGTTTACTTATCTTATGCCACGGGAAGTTTAGAGAGCTAAGATTATCTG
A_23_P303145	0.0037125174	2.8452925E-5	up	3.1402566	FGFR2	fibroblast growth factor receptor 2 [Source:HGNC Symbol;Acc:3689] [ENST00000359354]	AAGTGGACGTGGTATGAAATGTCTGACATTTTGGAAGCTGAGATTACTCTGAAAATGTTA
A_33_P3424112	0.006565009	1.0182822E-4	up	1.2529193	DHX40	Homo sapiens DEAH (Asp-Glu-Ala-His) box polypeptide 40 (DHX40), transcript variant 1, mRNA [NM_024612]	GAAGATTTACTACTTCCAATAGCAGCAATGTTGTCTGTGGAAAACGTCTTCATTAGACCT
A_21_P0000341	0.011581212	2.787186E-4	up	1.162623	SNORA61	Homo sapiens small nucleolar RNA, H/ACA box 61 (SNORA61), small nucleolar RNA [NR_002987]	GTGAAGCTGGCCTAAATGTTGTAATCTGGTATATGGCATGTGGGCTAGTTTCAGACAGGT
A_23_P104734	0.011366815	2.6958899E-4	down	-1.1983558	STT3A	Homo sapiens STT3A, subunit of the oligosaccharyltransferase complex (catalytic) (STT3A), transcript variant 2, mRNA [NM_152713]	ATTGGCTGGTCAGGATATACAAGGTAAAGGACCTGGATAATCGAGGCTTGTCAAGGACAT
A_23_P111311	0.0042597814	4.248112E-5	down	-1.3403356	AKAP12	Homo sapiens A kinase (PRKA) anchor protein 12 (AKAP12), transcript variant 2, mRNA [NM_144497]	CACAGGAGGAGTTACAGAAACAAGAGAGAGAATCTGCAAAGTCAGAACTTACAGAATCTT
A_23_P121637	0.019504705	6.9078925E-4	down	-1.281851	PRSS12	Homo sapiens protease, serine, 12 (neurotrypsin, motopsin) (PRSS12), mRNA [NM_003619]	GATGACAACAAATGGCAAGATCTGTTTTTGCTTTGTGTTGTGGTAAAAAATTGTGTACCC
A_24_P135322	0.010133533	2.1968018E-4	down	-1.825695	NRP1	Homo sapiens neuropilin 1 (NRP1), transcript variant 3, mRNA [NM_001024629]	GAAGATGATCATGGATGACAGCAAACGCAAGGCGAAGTCTTTTGAGGGCAACAACAACTA
A_23_P112135	0.010083365	2.1625607E-4	down	-1.2819853	TRAM1	Homo sapiens translocation associated membrane protein 1 (TRAM1), mRNA [NM_014294]	GTTCTTTTCAGTGTTCACATCTTGTTCCCCATTTCTCACTTGTGTCACCAGCTGTTTGTG
A_23_P67042	0.0020954076	7.5574917E-6	down	-1.4133015	MOCOS	Homo sapiens molybdenum cofactor sulfurase (MOCOS), mRNA [NM_017947]	ATTTCAATTGGCTCTTTGCGTTTCCAGGTTTTGGGGCCTTGTCACAGATGCCAGATGATT
A_21_P0005511	0.017959697	6.042634E-4	up	1.131822		PREDICTED: Homo sapiens uncharacterized LOC101930185 (LOC101930185), misc_RNA [XR_246867]	CCCTCCCTTTTCATATCCCGATTCTTAAGTTCTGCTATTGTGGTATTGTGGTCGAAAAAA
A_23_P112531	0.0026387959	1.31195275E-5	up	1.3766559	FAM102A	Homo sapiens family with sequence similarity 102, member A (FAM102A), transcript variant 1, mRNA [NM_001035254]	AGTATATCAGAGATATTTTTGGAAAGGAGTTGGTCTATGCAATGTCAGTTTGGAATCTTC
A_24_P219474	0.017697504	5.8550335E-4	down	-1.2896292	MGAT5B	Homo sapiens mannosyl (alpha-1,6-)-glycoprotein beta-1,6-N-acetyl-glucosaminyltransferase, isozyme B (MGAT5B), transcript variant 1, mRNA [NM_144677]	AAATCTCATTGGTTCTCAAGGACTAACCTGTGGGGGAAAGCAATAGAGACACTCTTTTTC
A_33_P3331491	0.019487027	6.8593846E-4	down	-1.4052138	LOC728392	Homo sapiens uncharacterized LOC728392 (LOC728392), mRNA [NM_001162371]	CCTGCATATTATTTACTTGCAAATGTCTGTAATCTGTAATTGTGATGCCTCTGATGGAAT
A_33_P3229301	0.0039493167	3.3832686E-5	up	2.6830494	DKFZp434J0226	Homo sapiens uncharacterized LOC93429 (DKFZp434J0226), long non-coding RNA [NR_027003]	CCAATAAACAAGAAAGCAGAACACAAAGAGCTGTGATGGAGTGGATCTTATGTAGTAAGA
A_23_P252335	0.0039074826	3.2382082E-5	up	1.1533234	MIS18A	Homo sapiens MIS18 kinetochore protein A (MIS18A), mRNA [NM_018944]	GCCGAATCCAAATTGTCCTTTGCCACTTGTAAAAGCTGAACTCTAGTCTGTGTCCTCCAT
A_23_P126103	0.008844712	1.6682215E-4	down	-1.5303609	CTH	Homo sapiens cystathionase (cystathionine gamma-lyase) (CTH), transcript variant 1, mRNA [NM_001902]	ATGTTTGCCTCTGAAGGAGGTGAGATTTGTGCTACTTTGGGAGATTATGTTCTTTTTTCA
A_23_P153986	0.0034852386	2.3745079E-5	down	-2.422526	KCNJ3	Homo sapiens potassium inwardly-rectifying channel, subfamily J, member 3 (KCNJ3), transcript variant 1, mRNA [NM_002239]	TTCCTTTCCCAAGTATTGCGAATGTGCAGAAAGCAACAGTTACGGAGGGAGGACATCATA
A_23_P379327	0.0038463078	3.1231968E-5	down	-1.5065558	FAM63B	Homo sapiens family with sequence similarity 63, member B (FAM63B), transcript variant 1, mRNA [NM_001040450]	GAAGGAAACAAAACAAAACAAAACTCACTCAAAACCAGCAGTGCTGCTATCAGATAAGTA
A_23_P101013	0.009842525	2.036826E-4	up	2.0332646	TMC6	Homo sapiens transmembrane channel-like 6 (TMC6), transcript variant 2, mRNA [NM_007267]	CAGATCAGCAATGAGGGTGAGGACAAAATCTTCTTAATCAACAAGCTTCACTCCATCTAC
A_23_P121182	0.010778479	2.4896782E-4	up	1.1451372	HACL1	Homo sapiens 2-hydroxyacyl-CoA lyase 1 (HACL1), transcript variant 1, mRNA [NM_012260]	GACGCCAGTTGGTGGTCTTGAGTTTTCTCTTTCTTGCAAGATGAAATTTTATTTTCCACA
A_23_P36658	0.0037588652	2.94107E-5	down	-1.6553836	MGST1	Homo sapiens microsomal glutathione S-transferase 1 (MGST1), transcript variant 3, mRNA [NM_145791]	TTTTTTGTTGGATATGGAGTTACTCTTTCCATGGCTTACAGGTTGCTGAAAAGTAAATTG
A_23_P17821	0.005627837	7.590502E-5	up	2.2700047	PLA2G3	Homo sapiens phospholipase A2, group III (PLA2G3), mRNA [NM_015715]	TACATGTATGTCCGTGTTGCAAAAATAATACATGCCTCAAAAACCTGCCTAGGGGAGCCC
A_33_P3300312	0.011892131	2.9109808E-4	down	-1.7289227	DMBT1	Homo sapiens deleted in malignant brain tumors 1 (DMBT1), transcript variant 2, mRNA [NM_007329]	AGGACCCATTGTCCTGGATGATGTGCGCTGCTCAGGACATGAGTCCTATCTGTGGAGCTG
A_23_P50919	0.005389344	6.978813E-5	down	-1.3262324	SERPINE2	Homo sapiens serpin peptidase inhibitor, clade E (nexin, plasminogen activator inhibitor type 1), member 2 (SERPINE2), transcript variant 1, mRNA [NM_006216]	ACCTTTTCTGTTTTTCATCCGACATAATCCTACAGGTGCTGTGTTATTCATGGGGCAGAT
A_23_P152235	0.007595936	1.3068807E-4	down	-1.6306069	IRX3	Homo sapiens iroquois homeobox 3 (IRX3), mRNA [NM_024336]	ATGTGTGAACCAAATTGTACGAGAAAGTATCTATTTTTGGCTAAATAAATGAGCTGCTGC
A_23_P218827	0.018399285	6.3376036E-4	up	1.4271474	POLQ	Homo sapiens polymerase (DNA directed), theta (POLQ), mRNA [NM_199420]	CATAGGCAGATAAAGATTTGGTTTCACCCTGGTGGTGGTAGGCATCGTGTGTGACTTTTT
A_23_P204850	0.019816397	7.1002997E-4	down	-1.1932157	RB1	Homo sapiens retinoblastoma 1 (RB1), mRNA [NM_000321]	GTGCCAGAATTTTAGGAACTTCAGAGATCGTGTATTGAGATTTCTTAAATAATGCTTCAG
A_33_P3371989	0.0037125174	2.8132723E-5	down	-3.1078894	IGSF1	Homo sapiens immunoglobulin superfamily, member 1 (IGSF1), transcript variant 2, mRNA [NM_205833]	GAGGATTTGCCTAAATATATATGTACAGTGCCTGGCATATAAGTTCTCAATAAATGGTAG
A_23_P112634	0.012071889	3.0091242E-4	down	-1.3396896	SMIM14	Homo sapiens small integral membrane protein 14 (SMIM14), mRNA [NM_174921]	GGGGTTGTCTGGGATTGTGTGAAAGAAAATTAGAACCACGCTGTATTTACATTTACCTTG
A_23_P104372	0.009859655	2.0441599E-4	up	1.1309302	DNAJC9	Homo sapiens DnaJ (Hsp40) homolog, subfamily C, member 9 (DNAJC9), mRNA [NM_015190]	CCAGTTTACATTTGGTCTTAATGATCTTGAATAGATCCTCTCTTCATTTTACTCAGCCAG
A_24_P84970	0.0098635405	2.0489508E-4	up	1.3877705			CTACACCCTGCAGATGGAGAAGGTCAATGGGATTTTGCTGCACCTGGAGTTAGAGCTGGC
A_23_P112554	0.0014699319	3.3605727E-6	down	-1.8734612	COL15A1	Homo sapiens collagen, type XV, alpha 1 (COL15A1), mRNA [NM_001855]	TCATATTTTAGTATGGTGTCTGTTTATGTAACTCTGACTTGCTGGAAAAGTTGAAACTCC
A_23_P121356	0.016066002	4.918645E-4	up	1.2259203	BBX	Homo sapiens bobby sox homolog (Drosophila) (BBX), transcript variant 2, mRNA [NM_020235]	AGAATGATCCTGGAGCTTTGCTTTCTATTGAAGGCTTTTGACGGTAATAGGTGGTAACTT
A_33_P3799692	0.01971809	7.0223276E-4	down	-1.6898522	LOC338620	Homo sapiens hypothetical protein LOC338620, mRNA (cDNA clone IMAGE:6023208), partial cds. [BC043009]	CTCATCTTTTGCTCAAATTGAAATGTCATCGAACTGTATTTCTCAAGTCAATGGTCTGTA
A_23_P78289	0.006338683	9.375302E-5	up	1.2282708	FAM104A	Homo sapiens family with sequence similarity 104, member A (FAM104A), transcript variant 2, mRNA [NM_032837]	TACTTGGTAGTGTCAGCGGGCACCTTTTACACCTTCTAGTAGCTCAAGCTAGTAAAACCT
A_33_P3417589	0.0039493167	3.355197E-5	up	1.9836472			AAGATCAAGACCTGCGATGGGAAGCTGGTATCCGAGTCCTCTGATGTCCTTCCTAAGTGA
A_23_P43810	0.0014100585	2.6365656E-6	down	-1.4685597	LTBP1	Homo sapiens latent transforming growth factor beta binding protein 1 (LTBP1), transcript variant 1, mRNA [NM_206943]	CATATGTAAAATTCAATGGAAGAGAGGTGGAACAGTGCTGTTATTTTAAACAGAAGGTTG
A_23_P76538	6.607343E-4	2.213777E-7	down	-3.8733482	TESC	Homo sapiens tescalcin (TESC), transcript variant 1, mRNA [NM_017899]	GCTCGTCTGCGCACCTTGTGTCTTGTAGGGTATGGTATGTGGGACTTCGCTGTTTTTATC
A_33_P3379922	0.0100689335	2.1551197E-4	up	1.7621644	PROC	Homo sapiens protein C (inactivator of coagulation factors Va and VIIIa) (PROC), mRNA [NM_000312]	TACACCAAAGTCAGCCGCTACCTCGACTGGATCCATGGGCACATCAGAGACAAGGAAGCC
A_19_P00315601	0.005017074	5.94269E-5	down	-1.4653294	XLOC_014512	BROAD Institute lincRNA (XLOC_014512), lincRNA [TCONS_l2_00030536]	CCAATGCCTCCCAGAAACCCCATCATCTCAAAATCACTAGCTATTAAAAGAAGCAAAAAA
A_24_P339514	0.0014632412	3.2928576E-6	up	5.5413013	CYP2B6	Homo sapiens cytochrome P450, family 2, subfamily B, polypeptide 6 (CYP2B6), mRNA [NM_000767]	GGTTCCCTGAGCTGTGGGATTCTGCACTGGTGCTTTGGATTCCCTGATATGTTCCTTCAA
A_33_P3316273	0.0033736592	2.2217519E-5	up	9.05222	CCL3	Homo sapiens chemokine (C-C motif) ligand 3 (CCL3), mRNA [NM_002983]	TGCTTTTGTTCAGGGCTGTGATCGGCCTGGGGAAATAATAAAGATGCTCTTTTAAAAGGT
A_23_P371613	0.011956697	2.936135E-4	up	1.1932659	CHCHD1	Homo sapiens coiled-coil-helix-coiled-coil-helix domain containing 1 (CHCHD1), mRNA [NM_203298]	ACAAACCTTACCTCAGCTGAAAATGGACAAGTATTTTCAATGACTGAAATATAGCTTCTG
A_33_P3313075	0.0038463078	3.1086605E-5	up	2.5699587			GCGCGAAGCTGTGGAATCCAGGCAGGAAGCGGCTGATCCTCAGCGCCCAGCCGCAGTGCT
A_23_P334709	0.0042528436	4.1678002E-5	down	-1.3354447	FKBP9	Homo sapiens FK506 binding protein 9, 63 kDa (FKBP9), transcript variant 1, mRNA [NM_007270]	TACTGATGTAGCCCTGAGGTAGTTCATGAAAATGCTGTGCACTCATTCCATGGAATAAAT
A_23_P374082	0.0037125174	2.88202E-5	up	2.6735175	ADAM19	Homo sapiens ADAM metallopeptidase domain 19 (ADAM19), mRNA [NM_033274]	ACACCGTCCACTGTGCGTTTGTATGTGTCTGGGATCCAGGGCAATGTGAATTTTCTTTTT
A_24_P163113	0.019986682	7.184948E-4	up	1.5309987	CDV3	Homo sapiens CDV3 homolog (mouse) (CDV3), transcript variant 2, mRNA [NM_017548]	GCCACCAAGGCTGTGACGAAGGACGAAGATGAATGGAAAGAATTGGAGCAAAAAGAGGTT
A_23_P250404	8.9715177E-4	9.184197E-7	up	1.1380434	RAD50	Homo sapiens RAD50 homolog (S. cerevisiae) (RAD50), mRNA [NM_005732]	TTGCACATGCTCTGGTTGAGATAATAAAAAGTCGCTCACAGCAGCGTAACTTCCAGCTTC
A_24_P396994	0.0066274516	1.03498365E-4	up	1.2106895	ATP6V1A	Homo sapiens ATPase, H+ transporting, lysosomal 70kDa, V1 subunit A (ATP6V1A), mRNA [NM_001690]	TATGCTCAGATATTCATCGTAAGTCTCCCTTCACCTGTTACAGAGTTTCAGATCGGTCAC
A_33_P3214650	0.005668525	7.675115E-5	up	1.5775051	TAP2	Homo sapiens transporter 2, ATP-binding cassette, sub-family B (MDR/TAP) (TAP2), transcript variant 1, mRNA [NM_000544]	GCTCAGTATTTTCGCAAACAGCAGCTGTCTAAGTTCACTGTTCTGAACTTTATTTTTTAA
A_23_P17663	0.0038062758	3.0163983E-5	up	4.3844438	MX1	Homo sapiens myxovirus (influenza virus) resistance 1, interferon-inducible protein p78 (mouse) (MX1), transcript variant 2, mRNA [NM_002462]	CAGCTTATTTCCTCATTTTTATAATGTCCCTTCACAAACCCAGTGTTTTAGGAGCATGAG
A_33_P3209960	0.009339818	1.8591648E-4	up	2.153429	RASGRP2	Homo sapiens RAS guanyl releasing protein 2 (calcium and DAG-regulated) (RASGRP2), transcript variant 2, mRNA [NM_153819]	TCTGCTAGACCAAGAAGGGAACCGACGGCACAGCAGCCTAATCGACATAGACAGCGTGTG
A_23_P170491	0.0120651005	2.9913668E-4	up	1.1880579	TRAIP	Homo sapiens TRAF interacting protein (TRAIP), mRNA [NM_005879]	TTGCTTCTAGGCATAGCCTGGGCCAAGCAGGGTGGGGAATGGAGGATAGCATGGGATGTA
A_23_P10374	0.018036911	6.1060366E-4	down	-1.2672942	R3HDM2	Homo sapiens R3H domain containing 2 (R3HDM2), mRNA [NM_014925]	TGTTTGTTTGAGGTTCGTGCCGCAGTAACAGACACAGTATTTAATTGCACATACAGATGT
A_21_P0010490	0.009221591	1.8138213E-4	up	3.0174437	XLOC_014511	BROAD Institute lincRNA (XLOC_014511), lincRNA [TCONS_00030031]	TGGAGTCCAAAAGCAGCAACTATGTTTATTTCTCCATAGAAAATAAATGTTCACCAAGGC
A_23_P110052	0.0014632412	3.2091064E-6	up	2.3972647	FOXL2	Homo sapiens forkhead box L2 (FOXL2), mRNA [NM_023067]	GCCCGAAAACCATAGACCTGGTTGTACTGTAGCTTGTTGTTTGGGGGACCAAATTTTCTA
A_24_P722216	0.010970493	2.5482746E-4	down	-1.4017435	DHTKD1	Homo sapiens dehydrogenase E1 and transketolase domain containing 1 (DHTKD1), mRNA [NM_018706]	CTCTAGTATTCATATCCCTTTTCTTACCATATACCTCAGTGTATCCTTCCTGTGTCAAGC
A_23_P159937	0.011406713	2.719835E-4	up	1.6151892	SLC6A8	Homo sapiens solute carrier family 6 (neurotransmitter transporter), member 8 (SLC6A8), transcript variant 1, mRNA [NM_005629]	AGTGTGAATTTATAGATCTAACTTTCATAGGCAAAACAAAAGCTTCGAGCTGTTGCGTGT
A_32_P465742	0.0033736592	2.2274302E-5	down	-6.9403124	PIP5K1B	Homo sapiens phosphatidylinositol-4-phosphate 5-kinase, type I, beta (PIP5K1B), transcript variant 2, mRNA [NM_003558]	TTCCTATGGACTTTTGCATTATTTCATTGTGCATGCATCCAGTGATTATACATAAGCAAC
A_23_P103476	0.0046695285	4.9848008E-5	down	-1.2748426	UBIAD1	Homo sapiens UbiA prenyltransferase domain containing 1 (UBIAD1), mRNA [NM_013319]	TTAAAGTCAGAGTCTCTGAGGAAGGAATGTGATTTGGCAGTCAGGGTACTAAGCATGGGT
A_23_P316612	0.0028293384	1.566929E-5	down	-2.296129	GLIS1	Homo sapiens GLIS family zinc finger 1 (GLIS1), mRNA [NM_147193]	TGCAGAACTTGTTTTCCGTTCCCCTGCCAGTTTTATATTTTTGGTTTTACAAGAAAAAAC
A_21_P0008663	0.005863252	8.262333E-5	up	2.2359188	XLOC_011331	BROAD Institute lincRNA (XLOC_011331), lincRNA [TCONS_00023486]	CCACACTGACACTTGCTGTGCCATTGATTTGACTTTTCTCCTATCTTAACAATAACAAAT
A_23_P106194	0.009145282	1.792613E-4	down	-1.549151	FOS	Homo sapiens FBJ murine osteosarcoma viral oncogene homolog (FOS), mRNA [NM_005252]	AGAGGGTTCCTGTAGACCTAGGGAGGACCTTATCTGTGCGTGAAACACACCAGGCTGTGG
A_24_P636332	0.015338015	4.5121784E-4	up	1.1798708	CCDC84	Homo sapiens coiled-coil domain containing 84 (CCDC84), transcript variant 1, mRNA [NM_198489]	CAGAAAAAAGCTAATCATGCTCTCTACCAACTACCATGAGGCTAAAAGCAAAGTCAACAA
A_23_P120153	0.002391709	1.0082275E-5	up	1.2765875	RNF149	Homo sapiens ring finger protein 149 (RNF149), mRNA [NM_173647]	AGATGACTTTAGGATTTGCATTTTTCCCTTTATTGCCTCATTTCTTGTGACGCCTTGTTG
A_23_P128073	0.010263095	2.2819047E-4	down	-1.2711143	SMARCC2	Homo sapiens SWI/SNF related, matrix associated, actin dependent regulator of chromatin, subfamily c, member 2 (SMARCC2), transcript variant 2, mRNA [NM_139067]	CAAGGTTCTATTAACCACTTCTAAGGGTACACCTCCCTCCAAACTACTGCATTTTCTATG
A_23_P257423	0.010043977	2.1477985E-4	down	-1.2707573	ALG14	Homo sapiens ALG14, UDP-N-acetylglucosaminyltransferase subunit (ALG14), mRNA [NM_144988]	GGGCGAATTGTTTGACAAATGGCAACTGACTTCTTTAGAATTTTGCAGTTAACAGTAGTA
A_23_P117928	0.011028411	2.5688478E-4	up	1.1587788	BAHD1	Homo sapiens bromo adjacent homology domain containing 1 (BAHD1), mRNA [NM_014952]	AGGAGGTAGGGTCTTGGCTGCCCCGAACTTAAATGCTTTTGAAATCTCTTAGATGTGGAA
A_19_P00316404	0.012328791	3.1174914E-4	up	1.2863159	C17orf51	Homo sapiens chromosome 17 open reading frame 51 (C17orf51), mRNA [NM_001113434]	GGAACAGGGCTTCTCTAGATTATTTCAGGGAACGAGCTATTATTTGAATGTTAATTTAAG
A_33_P3232294	0.004162429	3.990859E-5	down	-1.678662	ITPR2	Homo sapiens inositol 1,4,5-trisphosphate receptor, type 2 (ITPR2), mRNA [NM_002223]	AAATGAAGGGTCTTGGTTTTATATTCATCCGTTCTGGAAACTGAGAAGCGAGGGTGACAA
A_23_P100632	0.017291062	5.646798E-4	up	1.1881256	HN1	Homo sapiens hematological and neurological expressed 1 (HN1), transcript variant 3, mRNA [NM_001002033]	TTCCTCCATGCTTGTGAACTGCACAACTTGAGCCTGACTGTACATCTCTTGGATTTGTTT
A_23_P89780	0.0036517319	2.6557265E-5	up	2.124254	LAMA3	Homo sapiens laminin, alpha 3 (LAMA3), transcript variant 1, mRNA [NM_198129]	TCTAATTTTGAATTCTGACCATGGATACCCATCACTTTGGCATTCAGTGCTACATGTGTA
A_23_P6708	0.005247154	6.592369E-5	up	1.3012092	NCBP2-AS2	Homo sapiens NCBP2 antisense RNA 2 (head to head) (NCBP2-AS2), long non-coding RNA [NR_024388]	AGTGTGATACTTCTCAGGCAAGATGTGTTAAGAATACCGGGGACTGTAGGCCTATGGTAA
A_33_P3256725	0.011406713	2.726964E-4	down	-3.7650392	PIP5K1B	Homo sapiens phosphatidylinositol-4-phosphate 5-kinase, type I, beta (PIP5K1B), transcript variant 3, mRNA [NM_001278253]	GACATACGCTCCATTAGCATTCCGATATTTCAGAGAACTTTTTGGTATCAAGCCTGATGA
A_24_P942773	0.006059424	8.765678E-5	up	1.1422069	SLMAP	Homo sapiens sarcolemma associated protein (SLMAP), mRNA [NM_007159]	AAAGTACAATAGAATTTCTGGAGTACAGATTAAACTATTTGCACTAACACACGTGACGTG
A_23_P120472	0.0032926563	2.0830972E-5	up	1.5811294	TFAP2C	Homo sapiens transcription factor AP-2 gamma (activating enhancer binding protein 2 gamma) (TFAP2C), mRNA [NM_003222]	TGTTCAAACGGGGGCCTTCTGGTTTTAGGAAACTTGTAGAAACGAAGCCTGCTGATTGAT
A_23_P122134	0.008917415	1.7100543E-4	up	1.4737276	NMUR2	Homo sapiens neuromedin U receptor 2 (NMUR2), mRNA [NM_020167]	ATTATCTATAACCTACTGTCTCGCCGCTTCCAGGCAGCATTCCAGAATGTGATCTCTTCT
A_23_P146233	0.0031768456	1.9842306E-5	down	-2.062694	LPL	Homo sapiens lipoprotein lipase (LPL), mRNA [NM_000237]	AACAGTCGATCAAGGGATGTATTGGAACATGTCGGAGTAGAAATTGTTCCTGATGTGCCA
A_23_P93881	0.009418961	1.8952436E-4	down	-1.2057022	SYPL1	Homo sapiens synaptophysin-like 1 (SYPL1), transcript variant 2, mRNA [NM_182715]	TTATATGTATGGGCATTACTCTTAGTGATATTTGTTTCCTGTCCTTTGTTGCTCATGCTG
A_23_P23765	0.008946903	1.7245258E-4	down	-1.1800086	ITGB3BP	Homo sapiens integrin beta 3 binding protein (beta3-endonexin) (ITGB3BP), transcript variant 2, mRNA [NM_014288]	AGTATACAGGCTTTGGAGGGCAGTAGAGAGCTTGAAAATCTCATTGGAATCTCCTGTGCA
A_23_P118065	0.0016761704	4.5918855E-6	down	-22.674282	HSD17B2	Homo sapiens hydroxysteroid (17-beta) dehydrogenase 2 (HSD17B2), mRNA [NM_002153]	AGGGAAAGGCGCTTACTTGTGGATCTGCCTTGCTCACTATTTGCCTATTGGCATATATGA
A_23_P113462	0.016456626	5.1634735E-4	up	1.345248	KIF21A	Homo sapiens kinesin family member 21A (KIF21A), transcript variant 2, mRNA [NM_017641]	GGTTGTAAACTGAATGCTGTGATAATACTCTGTATTCTTTATGGAAATGTTGTCCTGTAC
A_23_P58328	0.004859792	5.382848E-5	down	-2.202161	ANXA10	Homo sapiens annexin A10 (ANXA10), mRNA [NM_007193]	TGGTGATGCTGAGGACTACTAAAATGAAGAGGACTTGGAGTACTGTGCACTCCTCTTTCT
A_33_P3252809	0.016573612	5.224694E-4	up	1.1945226		HS268H5 {Homo sapiens} (exp=0; wgp=1; cg=0), partial (84%) [THC2523717]	GGGAGTATCCATTTCCTGTATCTTGCCAACACATGGTGTTATTAAGAAACAAAATGAAAT
A_23_P43476	0.0037962736	2.9927854E-5	up	1.7259718	VLDLR	Homo sapiens very low density lipoprotein receptor (VLDLR), transcript variant 1, mRNA [NM_003383]	TCTAAACAAATAATACCCCCGTCGGAATGGTAACCGAGCCAGCAGCTGAAGTCTCTTTTT
A_23_P62188	8.043037E-4	4.096909E-7	up	4.165875	ZC4H2	Homo sapiens zinc finger, C4H2 domain containing (ZC4H2), transcript variant 1, mRNA [NM_018684]	GGGAGGGGGATATTTTTCCTTCCTTAAGTAGTTTTACATTGCCACAGTGTGTATGTGTTC
A_33_P3433388	0.0021976328	8.6625E-6	down	-16.658487	TSL	Homo sapiens TSL-C mRNA, complete cds. [AB050003]	TTGAAGGTTCCTCTGTCTCATTTGACTGCCCTACAATTATTAAACTCTTTCTCTACTGCA
A_21_P0013078	0.011956697	2.9362118E-4	up	1.4640069	XLOC_014512	BROAD Institute lincRNA (XLOC_014512), lincRNA [TCONS_l2_00024711]	ATCTGAATGTGTCTGTGTCCCTGTTAGCCTAGTGTGAGGAGGTGGAGAGACCAGCCCTCC
A_33_P3353672	0.006760008	1.0805035E-4	up	1.1736355	RAB28	Homo sapiens RAB28, member RAS oncogene family (RAB28), transcript variant 2, mRNA [NM_004249]	TAAGAGTACTCCCGAGAATGAGTTATGACATTGTGGATCAGACTGTACCTGATGTTCAGA
A_23_P203972	0.0046695285	4.978239E-5	down	-2.5142946	FZD10	Homo sapiens frizzled family receptor 10 (FZD10), mRNA [NM_007197]	CTTCACAGTGCCAGGAAAGAGTGGTTTCTGCGTGTGTATATTTGTAATATATGATATTTT
A_33_P3315959	0.009472134	1.9105473E-4	down	-2.4177177	LGSN	Homo sapiens lengsin, lens protein with glutamine synthetase domain (LGSN), transcript variant 1, mRNA [NM_016571]	CGATATTTTGTTGCCATGAAGAAATATGAGTTGGAGAATGAAGAAATAGCTGCAGAGAGA
A_23_P130376	0.01633437	5.092921E-4	down	-1.3998699	PIEZO2	Homo sapiens piezo-type mechanosensitive ion channel component 2 (PIEZO2), mRNA [NM_022068]	TCTCGCATTCTGATTGATCATGTGAAGGAATCATTTATGGGCCCCGTCCCTAAGAGAAAC
A_33_P3261610	0.0034876862	2.3989485E-5	up	1.3850359	POLR3GL	Homo sapiens polymerase (RNA) III (DNA directed) polypeptide G (32kD)-like (POLR3GL), mRNA [NM_032305]	TTTCTTCAGACAAGCAAATCATTTGGTCAGAGTTCATATAATCTGTCTGTTCCCTGGAGA
A_23_P329870	0.0014632412	3.3164379E-6	up	1.7710774	RHBDF2	Homo sapiens rhomboid 5 homolog 2 (Drosophila) (RHBDF2), transcript variant 1, mRNA [NM_024599]	AAAGTAACGCTAACTTTGTAGGGACGATGTCTCATGGATTAAATAATATTCTTTATGGCA
A_24_P75680	0.0030109102	1.8297385E-5	up	3.0608764	SLC4A8	Homo sapiens solute carrier family 4, sodium bicarbonate cotransporter, member 8 (SLC4A8), transcript variant 4, mRNA [NM_001258402]	TTGCCTCCCTAATTTGCATTATTTTCATCTATGAAGCAATAGAAAAACTGATTCACCTGG
A_24_P56388	0.008619107	1.6136463E-4	down	-1.2580053	HIF1A	Homo sapiens hypoxia inducible factor 1, alpha subunit (basic helix-loop-helix transcription factor) (HIF1A), transcript variant 2, mRNA [NM_181054]	GTTGTCACAGTAAATATCTTGTTTTTTCTATGTACATTGTACAAATTTTTCATTCCTTTT
A_23_P251075	0.0049877474	5.7703302E-5	down	-1.9489917	MAMLD1	Homo sapiens mastermind-like domain containing 1 (MAMLD1), transcript variant 2, mRNA [NM_005491]	TTGGGGTTTGTCTTTGATGGTTTCTATCTGCAATTATCGTCATGTATATTTAAGTGTCTG
A_23_P352266	0.0014609939	3.0521956E-6	down	-2.721675	BCL2	Homo sapiens B-cell CLL/lymphoma 2 (BCL2), transcript variant alpha, mRNA [NM_000633]	TGGCTGATATTCTGCAACACTGTACACATAAAAAATACGGTAAGGATACTTTACATGGTT
A_33_P3309471	0.008000227	1.4379878E-4	down	-3.786177	PTPRQ	Homo sapiens protein tyrosine phosphatase, receptor type, Q (PTPRQ), mRNA [NM_001145026]	TTAAATGGCCGTCATTTCATTTCCCAAGGTTGATTTTGAGCAGTATACTTGGTGGAACTG
A_23_P57379	0.009738091	2.0056182E-4	up	1.141303	CDC45	Homo sapiens cell division cycle 45 (CDC45), transcript variant 2, mRNA [NM_003504]	AGGATCGGAGCAAGTTTCTGGACGCACTTATTTCCCTCCTGTCCTAGGAATTTGATTCTT
A_33_P3300092	0.012242952	3.086134E-4	up	1.27905	NDST1	Homo sapiens N-deacetylase/N-sulfotransferase (heparan glucosaminyl) 1 (NDST1), mRNA [NM_001543]	CCTTCCTCCATTAATGTACAATCTCGAACTAACTGCTAATAAAGTGGGGTTCTGTTTGTA
A_24_P48057	0.01211181	3.0220445E-4	down	-1.9949025	IRX5	Homo sapiens iroquois homeobox 5 (IRX5), transcript variant 1, mRNA [NM_005853]	CAGCTAGACCTGTGCAAAGACTCTCCCTATGAATTGAAGAAAGGTATGTCCGACATTTAA
A_33_P3312842	0.016438529	5.147389E-4	down	-1.241637	ZNRF2	Homo sapiens zinc and ring finger 2 (ZNRF2), mRNA [NM_147128]	CAAGTACAGGAGCAACTGCTGCTACCCAGAAAAATGTGTGTATTATAAATAATTAAAGAG
A_23_P57667	0.0064849425	9.866918E-5	up	1.4464108	PLXNA1	Homo sapiens plexin A1 (PLXNA1), mRNA [NM_032242]	TATACGGCTATTTCCTATTTTACTGTTCTTCAGATTTAGTACTTGTAAATAAACACACAC
A_24_P296698	0.0149189895	4.292896E-4	up	1.4012601	MAP2K3	Homo sapiens mitogen-activated protein kinase kinase 3 (MAP2K3), transcript variant B, mRNA [NM_145109]	ACTGCCCATCCCGGGTCCTTTCCCTGATGGGTTGGGGCAGTTACCTGGTTGCTGTTTTAA
A_33_P3289222	0.006059691	8.78995E-5	down	-1.2823266	LRRC41	Homo sapiens leucine rich repeat containing 41 (LRRC41), mRNA [NM_006369]	AGAACCCCAACCACCAGTTCTATCTTTCTCTTTCTGTCACCTTTTTTCTCTTTTTTCCTT
A_23_P72138	0.0090676695	1.7648957E-4	up	1.2986311	MRPS22	Homo sapiens mitochondrial ribosomal protein S22 (MRPS22), mRNA [NM_020191]	ACAGAAGCACAGAAGGGAGCCTATATAGAACTAACACTGCAGACTTATCAAGAAGCACTC
A_33_P3212615	0.0042597814	4.1909327E-5	down	-2.59834	TFPI	Homo sapiens tissue factor pathway inhibitor (lipoprotein-associated coagulation inhibitor) (TFPI), transcript variant 1, mRNA [NM_006287]	CTGCTTTGTTCATTCTCTGTATTCAAAATTAACAGATCATGCTGAAAACCACTCAAACGA
A_23_P349463	0.0039676973	3.4278448E-5	up	4.185564	CHP2	Homo sapiens calcineurin-like EF-hand protein 2 (CHP2), mRNA [NM_022097]	AAGTCTGGACTCTTAAATGGGTTTTTGCTGATTTCCTGGGTGCATGCTAGGATGATGGGG
A_33_P3283480	0.015495946	4.5858842E-4	down	-1.3786895	CTSC	Homo sapiens cathepsin C (CTSC), transcript variant 2, mRNA [NM_148170]	GGATCAACTCCATCTTACTAACCATTTGATTCCCTATGTATTACACGATATATGACCAAT
A_23_P111804	0.0039074826	3.257583E-5	up	1.5454968	PARP12	Homo sapiens poly (ADP-ribose) polymerase family, member 12 (PARP12), mRNA [NM_022750]	TGATTCGGTTTCTCAGAGTCTCATGGCATCATAGTTTTTCCAGAATGACACAGTAGCCAC
A_23_P84576	0.01572522	4.717039E-4	down	-1.2222071	ANTXR1	Homo sapiens anthrax toxin receptor 1 (ANTXR1), transcript variant 2, mRNA [NM_053034]	TAATAGGTCTCGAGATCTTGGTGCAATTGTTTACTGTGTTGGTGTGAAAGATTTCAATGA
A_23_P31399	0.004792225	5.236768E-5	down	-1.6605716	PON2	Homo sapiens paraoxonase 2 (PON2), transcript variant 1, mRNA [NM_000305]	CATTGACCCAGAAATGTATGGCATGTGTAGTTAATTTTATTCCAGTAAGGAACGGCCCTT
A_33_P3293675	0.0039676973	3.4574376E-5	up	2.3505802	SLC12A7	Homo sapiens solute carrier family 12 (potassium/chloride transporter), member 7 (SLC12A7), mRNA [NM_006598]	CTACCTGGGCACGACGTTTGCAGGGGCCATGTATATTTTGGGGACCATCGAGATTTTTCT
A_23_P162589	0.0071638077	1.1775194E-4	up	1.8213048	VDR	Homo sapiens vitamin D (1,25- dihydroxyvitamin D3) receptor (VDR), transcript variant 2, mRNA [NM_001017535]	CAAGCGAGGTCAACAGAGAAGGCAGGAATGTGTGGCAGATTTAGTGAAAGCTAGAGATAT
A_33_P3223544	0.003955953	3.407145E-5	down	-1.2355406	TMBIM4	Homo sapiens transmembrane BAX inhibitor motif containing 4 (TMBIM4), transcript variant 1, mRNA [NM_001282606]	TGAAGAGTACGTATTAGCTGCCATCAGCCTCTACTTGGATATCATCAATCTATTCCTGCA
A_23_P215634	8.903381E-4	5.584921E-7	up	2.463476	IGFBP3	Homo sapiens insulin-like growth factor binding protein 3 (IGFBP3), transcript variant 1, mRNA [NM_001013398]	AGCCTCCACATTCAGAGGCATCACAAGTAATGGCACAATTCTTCGGATGACTGCAGAAAA
A_23_P29575	0.0042597814	4.21444E-5	up	1.0956674	MRPS36	Homo sapiens mitochondrial ribosomal protein S36 (MRPS36), mRNA [NM_033281]	GTGGAGGTCCTGAATAACCATGGTGGCTGCTGTTTGTCATCAGACAATAGAATTGTCTTT
A_23_P302787	0.006843232	1.09650326E-4	up	1.1892142	LINC01116	Homo sapiens long intergenic non-protein coding RNA 1116 (LINC01116), long non-coding RNA [NR_040001]	GCCAAGATTCATTCCATGATTAGTTTTTATGACCAAGTTATGAACGCTTTTGAATATGGG
A_23_P104762	0.01879217	6.522204E-4	down	-1.1295177	YAP1	Homo sapiens Yes-associated protein 1 (YAP1), transcript variant 2, mRNA [NM_006106]	AGCTTTGAGTTCTGACATCCTTAATGACATGGAGTCTGTTTTGGCTGCCACCAAGCTAGA
A_24_P398898	0.017042955	5.481788E-4	down	-1.1288205	MORF4L1	Homo sapiens mortality factor 4 like 1 (MORF4L1), transcript variant 2, mRNA [NM_206839]	TTGACAAAGCTGCTTTTGAATGCTGGTGGTTCTATTCCTTTGACACTACGCACTTTTATA
A_23_P16252	0.015219298	4.4213023E-4	up	4.384819	KLK1	Homo sapiens kallikrein 1 (KLK1), mRNA [NM_002257]	GTCAGAGTGCTGTCTTATGTGAAGTGGATCGAGGACACCATAGCGGAGAACTCCTGAACG
A_33_P3218138	0.0036138091	2.60678E-5	up	1.1786788	POLR2A	Homo sapiens polymerase (RNA) II (DNA directed) polypeptide A, 220kDa (POLR2A), mRNA [NM_000937]	ACAGCTGATCCTCGGGAAGAACAAAGCTAAAGCTGCCTTTTGTCTGTTATTTTATTTTTT
A_33_P3390335	0.0151483575	4.3738238E-4	down	-1.3116807	RSU1	Homo sapiens Ras suppressor protein 1 (RSU1), transcript variant 1, mRNA [NM_012425]	TAATGACAAATCGAAAAAGATCAGCCGGAAACCCCTGGCAGCCAAGAACAGATAAGGAAG
A_24_P101651	0.01365615	3.7142014E-4	up	1.2663223	CSAG4	Homo sapiens CSAG family, member 4 (pseudogene) (CSAG4), non-coding RNA [NR_073432]	AACACTATCCAGCCACTCCGACCAGCCAAAAGAACTCAATCAAAATGAGACACAGTAGGA
A_23_P129433	0.012996452	3.4352703E-4	up	1.2439482	SLC9A5	Homo sapiens solute carrier family 9, subfamily A (NHE5, cation proton antiporter 5), member 5 (SLC9A5), mRNA [NM_004594]	CAGGTGACTTTCTAGGGATCAGCACCTGCCCTGTGTTTTGTACCTTGAACCTAAGATATA
A_23_P312150	0.0021284928	8.116308E-6	up	3.040657	EDN2	Homo sapiens endothelin 2 (EDN2), mRNA [NM_001956]	TTATTTTAATGTATTTTTTAGACCCTCTATTTACCTGCGAACTTGTGTTTATAATAAATG
A_33_P3228455	0.007336911	1.2305546E-4	down	-1.2933044	FXYD3	Homo sapiens FXYD domain containing ion transport regulator 3 (FXYD3), transcript variant 5, mRNA [NM_001136009]	AGTGTTGACTTGAGAAAACTTCCTGGAGGTGGTGAGCTATTGGATCAAAACCCTCATCTG
A_23_P339818	0.011826795	2.8716787E-4	up	2.4842012	ARRDC4	Homo sapiens arrestin domain containing 4 (ARRDC4), mRNA [NM_183376]	GCACAGTAAGAAACAATAGGCAAGCGTTATGTTTTTGGTAAGTTAACTATGAAAGCTTTC
A_19_P00805006	0.017656375	5.807858E-4	up	1.2645137	MALAT1	Homo sapiens metastasis associated lung adenocarcinoma transcript 1 (non-protein coding) (MALAT1), long non-coding RNA [NR_002819]	CTGGTGTTTTGAGAAGCCCTACTGCTGAAAACTTAACAATTTTGTGTAATAAAAATGGAG
A_23_P112412	0.0053402213	6.8092995E-5	up	1.1494071	TEX10	Homo sapiens testis expressed 10 (TEX10), transcript variant 1, mRNA [NM_017746]	GTGTTCAGGAACAGTGGCTCACAGACTTACATTACTGCTTTAACGTGTATATCACTGGGC
A_33_P3241269	0.019628957	6.9789786E-4	down	-4.008538	CES1	Homo sapiens carboxylesterase 1 (CES1), transcript variant 1, mRNA [NM_001025195]	AGGAGCAAGTTTTGTATTTGTGACCTCAGCTTTGGGAATAAAGGATCTTTTGAAGGCCAA
A_19_P00804596	0.004098543	3.7236485E-5	up	1.339326	C17orf51	Homo sapiens chromosome 17 open reading frame 51 (C17orf51), mRNA [NM_001113434]	GGGAACAGGGCTTCTCTAGATTATTTCAGGGAACGAGCTATTATTTGAATGTTAATTTAA
A_23_P145024	0.004098543	3.7722846E-5	up	1.3909922	ADRB2	Homo sapiens adrenoceptor beta 2, surface (ADRB2), mRNA [NM_000024]	CTCTTATTTGCTCACACGGGGTATTTTAGGCAGGGATTTGAGGAGCAGCTTCAGTTGTTT
A_23_P20255	6.607343E-4	2.1324698E-7	up	1.159887	COMMD5	Homo sapiens COMM domain containing 5 (COMMD5), transcript variant 1, mRNA [NM_014066]	TCCCATTCAGATCCGGCTTGGACAGGCACCTGAGATGGTGCCAAAGTGCAGCTGACTCTT
A_23_P166686	0.0048884484	5.4338572E-5	up	1.2835659	AMOTL2	Homo sapiens angiomotin like 2 (AMOTL2), transcript variant 2, mRNA [NM_016201]	TTTTGTTATGCCACCCTGTACCAGGATTGCTGCCGCATTCCACTGGGTATAACAGTATTT
A_23_P130149	0.005627837	7.5849566E-5	up	1.5725162	ENO3	Homo sapiens enolase 3 (beta, muscle) (ENO3), transcript variant 1, mRNA [NM_001976]	CTCGGAGCGTCTGGCCAAATACAACCAACTCATGAGGATCGAGGAGGCTCTTGGGGACAA
A_23_P121898	0.0078880405	1.3903233E-4	down	-1.4188465	PARP8	Homo sapiens poly (ADP-ribose) polymerase family, member 8 (PARP8), transcript variant 2, mRNA [NM_024615]	TGCAAAGCCGTAACTTAAAATGCATAGCCTTATGTGAAGTGATCACCTCATCTGACCTGC
A_32_P216520	0.010801527	2.497812E-4	down	-1.7018998	WIF1	Homo sapiens WNT inhibitory factor 1 (WIF1), mRNA [NM_007191]	AAATTGGGCAAAAATGCGTAAGTCACAAGAATTTGGATGGTGCAGTTAATGTTGAAGTTA
A_24_P81900	0.0028768918	1.6419508E-5	up	1.8687236	SLC2A3	Homo sapiens solute carrier family 2 (facilitated glucose transporter), member 3 (SLC2A3), mRNA [NM_006931]	ACTGGATGAAATAACTCCTTCTTGTAGTAGTCTCATTACTTTTGAAGTAATCCCGCCACC
A_24_P59667	0.005803667	7.983917E-5	up	2.1396608	JAK3	Homo sapiens Janus kinase 3 (JAK3), mRNA [NM_000215]	TGAGGCCTCAGTACAGAGGGGGCTCTGGAAATGTTTGTTGACTGAATAAAGGAATTCAGT
A_21_P0009342	0.013381733	3.5815433E-4	down	-1.1725074	LOC645638	Homo sapiens WDNM1-like pseudogene (LOC645638), non-coding RNA [NR_030732]	TTCCAAGATGTGACTGTCTGGAGTTCCTTGACTAGGAAGATGGATGAAAACAGCAAGCCT
A_33_P3377619	0.004561502	4.7372072E-5	up	1.4825566	CACUL1	Homo sapiens CDK2-associated, cullin domain 1 (CACUL1), mRNA [NM_153810]	TTTCAGGTCACACCTTCAACTATGGCAAATATTGTGAAAGGCCTGTATACCCTCAGACCA
A_23_P259413	0.008946903	1.7243053E-4	up	1.5733986	CDV3	Homo sapiens CDV3 homolog (mouse) (CDV3), transcript variant 2, mRNA [NM_017548]	GCCAGGTTAACCACAACAAGGAAAACACCACAAGGACCACCAGAAATCTACAGTGATACA
A_23_P165707	0.017912203	5.979565E-4	down	-1.7491055	LYG1	Homo sapiens lysozyme G-like 1 (LYG1), mRNA [NM_174898]	AACCCAAGACCATGATCACATATGCAGCCTCAAATGTTACACAGATAAAACTAGCCAAGG
A_21_P0000120	0.009373224	1.8755217E-4	up	1.3512753	KCNJ18	Homo sapiens potassium inwardly-rectifying channel, subfamily J, member 18 (KCNJ18), mRNA [NM_001194958]	GGAGAAACACCGGGTTTCAGCTTTCTCGACCTTAGCTTGGGTGAGACTGTTTACAAAAAA
A_33_P3230990	0.0014632412	3.2700998E-6	down	-4.398585	SCUBE1	Homo sapiens signal peptide, CUB domain, EGF-like 1 (SCUBE1), mRNA [NM_173050]	TAGGAAAATGCCCTTTGGTCACTGTAAATATGAATTGTGACCCCATCCCTTCCCGCATGA
A_21_P0002584	0.0028768918	1.6273814E-5	up	1.407329	XLOC_001414	BROAD Institute lincRNA (XLOC_001414), lincRNA [TCONS_00004741]	GGAACTTCTGTTCTTACCCCTGTCCTTCCCTTCACCTTTTATAGTTACTAAATGCAATGT
A_23_P29985	0.015338015	4.513226E-4	down	-1.1324444	TRMT44	Homo sapiens cDNA FLJ12891 fis, clone NT2RP2004142. [AK022953]	TGCTCCGACCTTTGAGTTGTCCCGCCTTTCTGGACCAAACCAATGTATTTCTCAAATGTA
A_21_P0000511	0.0039493167	3.3517437E-5	up	1.4577957	SNAR-H	Homo sapiens small ILF3/NF90-associated RNA H (SNAR-H), small nuclear RNA [NR_024342]	GGAGGCGAGGGTGCGAGGGTACGAGTTTGAGGCCAACCTGGTCCACATTGGTTGAAAAAA
A_24_P177604	0.017697504	5.8486953E-4	down	-1.7225192	PPP1R3F	Homo sapiens protein phosphatase 1, regulatory subunit 3F (PPP1R3F), transcript variant 1, mRNA [NM_033215]	ATTTTTGTATAATTCTCTGGATGAGGGAGAGTGGTCGTGAGCTGGTCTTGGGGCACAATT
A_24_P96961	0.011406713	2.721196E-4	down	-1.1961063	SPSB1	Homo sapiens splA/ryanodine receptor domain and SOCS box containing 1 (SPSB1), mRNA [NM_025106]	GCCTTGTGGCTTGTACAGTTTTGAAACTCCCGTTCTATTTTATGATGGTTGATAATAGTC
A_23_P10206	0.005247154	6.5820124E-5	down	-1.5572399	HAS2	Homo sapiens hyaluronan synthase 2 (HAS2), mRNA [NM_005328]	ATTTCTATGAAAATGGGATGAATTCTTTGTTTATGCACTTTTTCCTTACTGTGCATCCGC
A_19_P00330464	0.0077291336	1.3405147E-4	up	1.3708225	HOTAIR	Homo sapiens HOX transcript antisense RNA (HOTAIR), transcript variant 3, long non-coding RNA [NR_047518]	GGAGATTACCATTCCCAATGCCTGAACTTCCTCCTGCTATTAAGATTGCTAGAGAATTGT
A_23_P259071	0.0028768918	1.6613045E-5	up	1.8601805	AREG	Homo sapiens amphiregulin (AREG), mRNA [NM_001657]	TGAGTCGGTCCTCTTTCCAGTGGATCATAAGACAATGGACCCTTTTTGTTATGATGGTTT
A_33_P3298062	0.01767011	5.826306E-4	up	1.4712588	ABCC5	Homo sapiens ATP-binding cassette, sub-family C (CFTR/MRP), member 5 (ABCC5), transcript variant 2, mRNA [NM_001023587]	CACCTGCTGTACAGTGTTTGTGAGATGCTCTTTGAAGATGGTACTTTTATATTTTTTCAT
A_23_P358709	0.0014100585	2.6400905E-6	down	-2.7215466	AHRR	Homo sapiens aryl-hydrocarbon receptor repressor (AHRR), transcript variant 1, mRNA [NM_020731]	AGAAAGTGTGGATGTATCACTTCTCTCTAAAATGTCATTGTTAGCACTAATTACAGGTTC
A_23_P40821	0.004046792	3.6129935E-5	up	1.2822316	HPS3	Homo sapiens Hermansky-Pudlak syndrome 3 (HPS3), mRNA [NM_032383]	AAGTCTTTAAGACATAAGAATTCCTCAAAGAAGCCATACATTTTTTAAGGGTGGGGATTG
A_23_P122375	0.016573612	5.226311E-4	down	-1.4547149	ZFAND3	Homo sapiens zinc finger, AN1-type domain 3 (ZFAND3), mRNA [NM_021943]	AACTGCAAATGTTTTTTGATCCGACGTACTGAAATAGGAAGTCATGCTCTTCCCACCCTC
A_23_P16944	0.008904416	1.7058066E-4	up	1.4477912	SDC1	Homo sapiens syndecan 1 (SDC1), transcript variant 1, mRNA [NM_001006946]	ACCCTGGGCCCTGGGCTGGAATCAGGAATATTTTCCAAAGAGTGATAGTCTTTTGCTTTT
A_24_P346855	0.0013442447	2.1724525E-6	down	-9.13357	MKI67	Homo sapiens marker of proliferation Ki-67 (MKI67), transcript variant 1, mRNA [NM_002417]	TCTCACCCTGGTAAGTACAGTATTTCAAGAGCACGCTAAGGGTGGTTTTCATTTTACAGG
A_23_P386320	0.012174873	3.054576E-4	up	1.7797192	MFI2	Homo sapiens antigen p97 (melanoma associated) identified by monoclonal antibodies 133.2 and 96.5 (MFI2), transcript variant 2, mRNA [NM_033316]	GCAGTGAAAGCTTTCATGACCATACAAATTATCTTTTTTCTTCCTATTTCCTTGTAGAGG
A_23_P106773	0.0067560175	1.0653532E-4	up	1.3417946	SULT1A2	Homo sapiens sulfotransferase family, cytosolic, 1A, phenol-preferring, member 2 (SULT1A2), transcript variant 2, mRNA [NM_177528]	AGAGGGAGTGTGCGAATCAAGCCTGACCAAGAGGCTCCAGAATAAAGTATGATTTGTGTT
A_23_P405885	0.010083365	2.1655367E-4	up	1.9517063	DPPA2	Homo sapiens developmental pluripotency associated 2 (DPPA2), mRNA [NM_138815]	CTAAAGAATCCCTTTCTGTATGTCTGAAAACCCATTAAAATAAAGTCACTGCAATTGGCA
A_23_P352950	0.005389344	7.031565E-5	up	1.5121211	PNMA5	Homo sapiens paraneoplastic Ma antigen family member 5 (PNMA5), transcript variant 3, mRNA [NM_052926]	GCTCCCCAGGAAGCTTTGTGCTTTGGCGTTCCACCCCTGCTGTTACTCGTGACTCAGTTT
A_33_P3218649	0.012898839	3.3842548E-4	down	-1.9202424	GPM6B	Homo sapiens glycoprotein M6B (GPM6B), transcript variant 1, mRNA [NM_001001995]	CTATCAGTGCCAAGGGCTTCCTGTAGTTCTATTCAAGTGTTACAATAAATATTTGTAGAT
A_33_P3387616	0.007945365	1.4187314E-4	up	1.7295698	RHPN1	Homo sapiens rhophilin, Rho GTPase binding protein 1 (RHPN1), mRNA [NM_052924]	CAAGGTCACGCAGGTCTCCCCAGCACGTGTTAATTTGGTTAATAAAACTGTGGATCAAGG
A_23_P102364	5.876252E-4	1.3897598E-7	up	1.8950324	NGEF	Homo sapiens neuronal guanine nucleotide exchange factor (NGEF), transcript variant 1, mRNA [NM_019850]	AGGAGCCCAGGTGTTTTAAGGAATGAATTGGTCACTGCATCTTGTATCGATTATGGTTCT
A_23_P47357	0.016474612	5.175611E-4	down	-1.1672022	RPS25	Homo sapiens ribosomal protein S25 (RPS25), mRNA [NM_001028]	AAGTAATTTACACCAGAAATACCAAGGGTGGAGATGCTCCAGCTGCTGGTGAAGATGCAT
A_33_P3235053	0.0023619947	9.768111E-6	up	1.3113637	TRIM47	Homo sapiens tripartite motif containing 47 (TRIM47), mRNA [NM_033452]	CCCAGGTTTCTAGAATAGTGTCTGGCATGTAGTAGATGCTCAATAAACACTTGTTGAATG
A_23_P132417	0.0024407227	1.0967595E-5	up	1.2411813	LSG1	Homo sapiens large 60S subunit nuclear export GTPase 1 (LSG1), mRNA [NM_018385]	CGATGGTCACACAACTCTGAATATGCTTAAGACCATTGAATTACACACTTTACGTTGGTG
A_33_P3276845	2.7860372E-4	3.4012288E-8	up	230.91922			AGCACGCATTGCAGCTCTGATGCAGTCTATCACTGGCAGATCGGTGTCTGAGAACACCGC
A_23_P86100	0.015220706	4.427711E-4	up	1.1689115	KLHDC9	Homo sapiens kelch domain containing 9 (KLHDC9), transcript variant 2, mRNA [NM_001007255]	AAGCCTCGTTTTGTTTTGCTTTGTTGCAAACCTATAAAGCGTTATCACCAGAGCTATCTG
A_23_P345928	0.012532798	3.209212E-4	down	-1.2607445	METTL25	Homo sapiens methyltransferase like 25 (METTL25), mRNA [NM_032230]	GAAGCAGCAGTGATTTCCATTGAAGCAAATTATTAGATGTATTTCTCTATGAGACCTGTT
A_21_P0012710	0.017482117	5.7298644E-4	down	-1.6930206			TTTTGACAAAAAGATCGTCAGAGTACAGCTCAGCACATTCTCACAGACAGAATCGCCCTG
A_23_P47077	0.017190328	5.5698573E-4	up	1.2972394	BAG3	Homo sapiens BCL2-associated athanogene 3 (BAG3), mRNA [NM_004281]	ACTTTGAAGGCAAGAAGACTGACAAAAAGTACCTGATGATCGAAGAGTATTTGACCAAAG
A_33_P3246883	0.0011601812	1.6691939E-6	up	13.283914	DMKN	Homo sapiens dermokine (DMKN), transcript variant 2, mRNA [NM_033317]	CAACCAGCATGCGTATCCCACTGCCTATGGTGGGAAGTACTCAGTCAAGACCCCTGCAAA
A_24_P193295	0.0072405976	1.19870354E-4	up	1.394027	RAB15	Homo sapiens RAB15, member RAS oncogene family (RAB15), mRNA [NM_198686]	TCTCGGGTCCATATATGAATTGTGAGCAGGGTTCATCTATTTTAAACACAGATGTTTACA
A_23_P10463	0.00178941	5.0431745E-6	down	-1.1626527	NDUFS5	Homo sapiens NADH dehydrogenase (ubiquinone) Fe-S protein 5, 15kDa (NADH-coenzyme Q reductase) (NDUFS5), transcript variant 1, mRNA [NM_004552]	TGATGTCTGGAGGCTGATTTTCCTGTTCTCTGTTCTCCACTGGAAAGGTTGTTTACGACA
A_23_P164089	0.0058282875	8.079605E-5	down	-1.76884	RFFL	Homo sapiens ring finger and FYVE-like domain containing E3 ubiquitin protein ligase (RFFL), transcript variant 2, mRNA [NM_001017368]	TGGATGTGAATTGTTACTTCAAGTGGCTTTTATTAAGATTTTCTCAGACTTACTTGGAGG
A_24_P169843	0.015328658	4.5010916E-4	up	1.4832373			CTGGAGAAGAAGGGACCCGTCAGAGACTGGAGCCATTACTTCAAGACCATCAAGGATTTG
A_33_P3399560	0.004659229	4.9311297E-5	up	1.3412881	IFT27	Homo sapiens intraflagellar transport 27 homolog (Chlamydomonas) (IFT27), transcript variant 1, mRNA [NM_001177701]	AAGACCGCCCTGGCACAGATCTTCCGCAGTGATGGAGCCCATTTCCAGAAAAGCTACACC
A_23_P127948	0.003468727	2.3312165E-5	up	1.6407863	ADM	Homo sapiens adrenomedullin (ADM), mRNA [NM_001124]	GTGTAAAGTTGTTCGCCGCGTGGAATGTGAGTGTGTTTGTGTGCATGAAAGAGAAAGACT
A_33_P3287567	0.015546081	4.6234723E-4	up	1.1270308	BCAP29	Homo sapiens B-cell receptor-associated protein 29 (BCAP29), transcript variant 2, mRNA [NM_018844]	GTTTGTCCTATGCAGCACAAAACCTTTGTATCTTTGCCTTTTATGTTGGGATCTTAATTA
A_33_P3308332	0.0048242724	5.3054733E-5	up	2.4873135	PLEKHB1	Homo sapiens pleckstrin homology domain containing, family B (evectins) member 1 (PLEKHB1), transcript variant 1, mRNA [NM_021200]	TAAAGCTCCCCTGTAAATGGGGGCTCCATTAGTTCTGCTGCCGAGACTAATAAAGATTTG
A_23_P100220	0.006458343	9.797572E-5	up	1.5986053	ESRP2	Homo sapiens epithelial splicing regulatory protein 2 (ESRP2), mRNA [NM_024939]	CTCAACTGCTGGCTCTTCTTCCCTTTGTATTTGTGTAAGGAGCACTGCACTCCCATAAAA
A_23_P132438	0.009904255	2.1003526E-4	up	1.3386128	MSL2	Homo sapiens male-specific lethal 2 homolog (Drosophila) (MSL2), transcript variant 1, mRNA [NM_018133]	GAAAAATACTGCTGGAAAATTTCCAATTTCTACTACGTTCACCATCTCTAGTAAGATCTG
A_23_P84782	0.008855079	1.6757264E-4	up	1.1452174	THAP4	Homo sapiens THAP domain containing 4 (THAP4), transcript variant 1, mRNA [NM_015963]	CACAGCCAATGACTCAGCATCTTCACGTCACCTACAAGAAGGTGACCCCGTAAACCTAGA
A_23_P82868	0.004000943	3.5280103E-5	up	2.4660447	PLAT	Homo sapiens plasminogen activator, tissue (PLAT), transcript variant 1, mRNA [NM_000930]	TGAACAACTAGGCTTCAGCATATTTATAGCAATCCATGTTAGTTTTTACTTTCTGTTGCC
A_23_P122197	0.0050241533	5.9609774E-5	up	1.1234263	CCNB1	Homo sapiens cyclin B1 (CCNB1), mRNA [NM_031966]	GGACACCAACTCTACAACATTACCTGTCATATACTGAAGAATCTCTTCTTCCAGTTATGC
A_33_P3209591	0.018026127	6.0715916E-4	up	1.4577976	AQP3	Homo sapiens aquaporin 3 (Gill blood group) (AQP3), mRNA [NM_004925]	ACTTCGCCGACAACCAGCTTTTTGTTTCGGGCCCCAATGGCACAGCCGGCATCTTTGCTA
A_24_P319364	8.408975E-4	4.80617E-7	up	2.817674	F11R	Homo sapiens F11 receptor (F11R), mRNA [NM_016946]	TTTACTTCTCTAGCTTACAATGGACCTTTTGAACTGGAAAACACCTTGTCTGCATTCACT
A_23_P250347	0.0061655887	9.01647E-5	up	1.5591527	CAMK4	Homo sapiens calcium/calmodulin-dependent protein kinase IV (CAMK4), mRNA [NM_001744]	AGGTGCAAGCCTTAGAGAAAGTTAAAGGTGCAGATATAAATGCTGAAGAGGCCCCCAAAA
A_23_P54376	0.019504705	6.888496E-4	down	-1.4439429	STOML1	Homo sapiens stomatin (EPB72)-like 1 (STOML1), transcript variant 1, mRNA [NM_004809]	GTTCTGTGCTTCTTACCAGAGGTTTGCAAGCCTCAGACAAATAAATGTGGTGTTTACAAT
A_23_P150092	0.018338032	6.2917E-4	down	-1.2880242	SEPHS1	Homo sapiens selenophosphate synthetase 1 (SEPHS1), transcript variant 1, mRNA [NM_012247]	ACCCGGGGCCACCTCTTAATCTAGACAGAAATAGCTGTTTGGTTTTGTTTTTAAATAGAT
A_33_P3424800	0.0050467346	6.0573944E-5	up	1.4017626	HLA-B	Homo sapiens major histocompatibility complex, class I, B (HLA-B), mRNA [NM_005514]	GGTTGATGGATTAATTAAATAAGTCAATTCCTGGAAGTTGAGAGAGCAAATAAAGACCTG
A_21_P0010695	0.009160858	1.7982644E-4	down	-1.3570662	LINC00339	Homo sapiens long intergenic non-protein coding RNA 339 (LINC00339), transcript variant 1, long non-coding RNA [NR_023918]	TTATGTAACCCCACCAGTAACTCATTTGGGGTGCCCTTGAAATATTAAAGTTTGGTCCTC
A_23_P202071	0.0051966785	6.431964E-5	down	-4.3585887	CELF2	Homo sapiens CUGBP, Elav-like family member 2 (CELF2), transcript variant 3, mRNA [NM_001025077]	TTTTTCTGATTCTTCTGTCCTCATTGTGAACATAACCGTGTAGTTGAAACAGTCAAACTT
A_23_P425681	0.0046695285	5.024858E-5	up	6.7963214	CCK	Homo sapiens cholecystokinin (CCK), transcript variant 1, mRNA [NM_000729]	CTTCATCTGTGACTCCTGTTCTGAAAATGTTGTTATGCTATTAAAGTGATTTCATTCTGC
A_33_P3213822	0.012112545	3.0270024E-4	down	-5.3756433	KCNK2	Homo sapiens potassium channel, subfamily K, member 2 (KCNK2), transcript variant 1, mRNA [NM_001017424]	CTGTTCCGAAAATTTATATGGTGGAATGCGCCATGTATAAACTGTGAATTGTATTGACAA
A_24_P394533	0.0050319075	5.9993712E-5	down	-1.2890847	NEU1	Homo sapiens sialidase 1 (lysosomal sialidase) (NEU1), mRNA [NM_000434]	TTGGGCAGGTCTAGTGAGCTGTAGAATTGAATCAATGTGAACTCAGGGAACTGGGGAAGG
A_23_P43175	0.0061983	9.076523E-5	down	-1.2463945	SEPT10	Homo sapiens septin 10 (SEPT10), transcript variant 1, mRNA [NM_144710]	AAATGCACATAATTCATATTTCAGGTGGTATTTGCATTCAGTGCCTTACTGGTATTCTCA
A_33_P3253807	0.009339425	1.8547077E-4	up	1.2432361	CEBPG	Homo sapiens CCAAT/enhancer binding protein (C/EBP), gamma (CEBPG), transcript variant 1, mRNA [NM_001806]	GGAAAAAGTACTAACTTGTTCTTTTTGTTCCTGGCTTTCATCAGTTTGTGAGATTTCTCT
A_23_P209394	0.013115433	3.489591E-4	down	-1.2230824	CFLAR	Homo sapiens CASP8 and FADD-like apoptosis regulator (CFLAR), transcript variant 3, mRNA [NM_001127184]	AATCTGGTTGCCCCAGATCAACTGGATTTATTAGAAAAATGCCTAAAGAACATCCACAGA
A_23_P380881	0.0067560175	1.0715409E-4	up	1.7063488	ANKRD13B	Homo sapiens ankyrin repeat domain 13B (ANKRD13B), mRNA [NM_152345]	TCGGAGAGTGGGGAGCATATTGGGCTGGGGTAAGCACTAGACCCAAGTAGACTGGACACA
A_24_P264943	0.0036645783	2.674918E-5	up	1.6974565	COMP	Homo sapiens cartilage oligomeric matrix protein (COMP), mRNA [NM_000095]	TTACCGCTGCAATGACACCATCCCAGAGGACTATGAGACCCATCAGCTGCGGCAAGCCTA
A_24_P15621	0.009339818	1.8585872E-4	up	1.3734127	SLC6A10P	Homo sapiens solute carrier family 6 (neurotransmitter transporter), member 10, pseudogene (SLC6A10P), non-coding RNA [NR_003083]	TGGTTTGCATGGGCATCTTCATCTTCAACGTTGTGTACTACAAGCCGCTGGTCTACAAAA
A_24_P645765	0.017869413	5.9554144E-4	down	-1.3958559	KLHL42	Homo sapiens kelch-like family member 42 (KLHL42), mRNA [NM_020782]	TTTTTATTTTCTCTGTTGACTTAGGAACACATCATAAATTCACACCAACTGACACGTTGC
A_23_P110253	0.012133076	3.039307E-4	up	1.1389252	KIT	Homo sapiens v-kit Hardy-Zuckerman 4 feline sarcoma viral oncogene homolog (KIT), transcript variant 1, mRNA [NM_000222]	AAAGTGGTTGTTAGTTATAGATGTCTAGGTACTTCAGGGGCACTTCATTGAGAGTTTTGT
A_23_P410312	0.017954074	6.036707E-4	down	-1.3154155	C12orf76	Homo sapiens chromosome 12 open reading frame 76 (C12orf76), mRNA [NM_207435]	TCAAGCACAGCACTGATTTTAACAACCTGCATTTAATGTGAAGTAACCGAAGTAGGATAC
A_23_P115407	0.0066274516	1.0363259E-4	down	-1.2932671	GSTM1	Homo sapiens glutathione S-transferase mu 1 (GSTM1), transcript variant 2, mRNA [NM_146421]	GCCCTACTTGATTGATGGGGCTCACAAGATCACCCAGAGCAACGCCATCTTGTGCTACAT
A_23_P120860	0.017808208	5.9174676E-4	down	-1.1018522	NIPSNAP1	Homo sapiens nipsnap homolog 1 (C. elegans) (NIPSNAP1), transcript variant 1, mRNA [NM_003634]	GGAAGGTAGAACTTAGAATTCAGAACTTGGGTTTCAATTGTAGAATTTGGAATCTGGAAT
A_23_P435697	0.011840756	2.881249E-4	up	1.2672361	C10orf137	Homo sapiens chromosome 10 open reading frame 137 (C10orf137), transcript variant 2, mRNA [NM_015608]	ATGCAGTTACACTTTCACGTATTTTTGAAGTATGTCAAGCTACACGGGTCTAAGATATGA
A_23_P33326	0.005871282	8.28522E-5	up	1.7521777	ADRA1B	Homo sapiens adrenoceptor alpha 1B (ADRA1B), mRNA [NM_000679]	CTCCTTGTACTTCACTGAAGGATGGCACTTTGGTGGGGTTGGAAACAAAGTCGACATTAA
A_24_P217572	0.0021249522	7.87345E-6	down	-1.5361534	EDNRA	Homo sapiens endothelin receptor type A (EDNRA), transcript variant 1, mRNA [NM_001957]	GGTTGGTTTGATAAAGCAGTATTTGGGGTCATATTGTTTCCTGTGCTGGAGCAAAAGTCA
A_24_P136211	0.019519202	6.921643E-4	down	-1.1246837			GACGTGAGGAATTTCTCCTGGGGCTCAGAATGTTGTGCTCATAAAACAACGATCATCGAT
A_23_P12357	0.0015049276	3.529561E-6	up	1.8583272	CRB1	Homo sapiens crumbs homolog 1 (Drosophila) (CRB1), transcript variant 1, mRNA [NM_201253]	TCAACAGTCTGTGGGAATGAGAAGACAAATCTCACTTGCTACAATGGAGGCAACTGCACA
A_23_P80008	0.0038463078	3.1175692E-5	up	2.8779995	MYLK2	Homo sapiens myosin light chain kinase 2 (MYLK2), mRNA [NM_033118]	CAGGAGAATTAGGAAGGCCATGGGGCAGCCTCCAGTCTGCTCTCAGCTTGTGCCTTGTAA
A_23_P203391	0.0058541866	8.1863516E-5	up	1.6558597	ASRGL1	Homo sapiens asparaginase like 1 (ASRGL1), transcript variant 1, mRNA [NM_001083926]	TTCTGAAGCAATGAGAGAAATGCCCGTATTAGGAGGATTACTTGAGCCCTGGAGGTCAAA
A_24_P64329	0.0031949964	2.0150157E-5	up	1.8987967	STK32C	Homo sapiens serine/threonine kinase 32C (STK32C), mRNA [NM_173575]	ATCTTCAAGACTGCCTCGATGCCATCCAGCAAGACTTCGTGATTTTTAACAGAGAAAAGC
A_33_P3327847	0.017916135	5.98511E-4	up	1.3731786	SGPL1	Homo sapiens sphingosine-1-phosphate lyase 1 (SGPL1), mRNA [NM_003901]	CTGGGTAGGCAAAGTCAGATTTTTGAGAACCTTTTTCCTGATTTGAAGTTTTAATTACCT
A_24_P350589	0.015000093	4.3251022E-4	down	-1.982273	RNF150	Homo sapiens ring finger protein 150 (RNF150), mRNA [NM_020724]	CAATAGCAACAGAAATATAAATTATATTCCATTCCCAGAGAGAGAATGCGCTTTGGATTG
A_23_P251937	0.014913109	4.2882646E-4	up	1.2798256	CPEB4	Homo sapiens cytoplasmic polyadenylation element binding protein 4 (CPEB4), mRNA [NM_030627]	GTATGTCAGTTAATTGTACTACTTGGCTGAATTTCCATATAGTTTTTACTGTGTATGGGG
A_24_P11506	0.0037000433	2.7407192E-5	down	-2.073025	KYNU	Homo sapiens kynureninase (KYNU), transcript variant 2, mRNA [NM_001032998]	GAGTCACAACTACAACTTCACGGACTTAACATTGAAGAAAGTATGCGGATGATAAAGCCA
A_24_P171873	0.0091978125	1.8073314E-4	down	-1.7176046	FBXO4	Homo sapiens F-box protein 4 (FBXO4), transcript variant 1, mRNA [NM_012176]	GATTCCACAGATTCAAAAAGTGTGTGAAGTTGTAGATGGGTTCATCTATGTTGCAAATGC
A_23_P32253	0.0025358961	1.1656238E-5	down	-1.6486384	NFIL3	Homo sapiens nuclear factor, interleukin 3 regulated (NFIL3), mRNA [NM_005384]	TGTGTTATCACTCTGCCTGTGTATAGTCAGATAGTCCATGCGAAGGCTGTATATATTGAA
A_33_P3216442	0.008710118	1.6376855E-4	up	1.5966583	COL11A2	Homo sapiens collagen, type XI, alpha 2 (COL11A2), transcript variant 1, mRNA [NM_080680]	AGAAACGGAATAGTGTGGGGTGTGTGCAGGGCTGCATCCCGCAGATGGCTGGAATATTAA
A_33_P3223687	0.005001551	5.8408263E-5	down	-7.8475738	C8orf22	Homo sapiens chromosome 8 open reading frame 22 (C8orf22), transcript variant 1, mRNA [NM_001007176]	CGTTTTTCCATTCTGAACCTGTGCTTTCAAATGTGAGAATAAAAGATCTGTCTGCTACTG
A_23_P111995	0.007901012	1.3980942E-4	down	-1.2888114	LOXL2	Homo sapiens lysyl oxidase-like 2 (LOXL2), mRNA [NM_002318]	TGACTCATCTTCCTGTTGTTCCAATTCTGTGGGTTTTTGATTCAACGGTGCTATAACCAG
A_24_P860797	0.013751409	3.7536613E-4	up	2.4408195	PAIP2B	Homo sapiens poly(A) binding protein interacting protein 2B (PAIP2B), mRNA [NM_020459]	AGTTAAATGGACTGTCAGTCAGTGAAGGTCATGATTCTGAAGATATTTTGAGCAAAAGTA
A_21_P0000251	0.0053402213	6.802123E-5	up	1.3670814	SNORA65	Homo sapiens small nucleolar RNA, H/ACA box 65 (SNORA65), small nucleolar RNA [NR_002449]	CTTAGGAAACAGGGTTGTTCTTCATGTGGATGACTCTGTGCCGAAAGCATGGGAACAGCT
A_23_P138139	0.009871443	2.0565352E-4	down	-1.292054	OMA1	Homo sapiens OMA1 zinc metallopeptidase (OMA1), mRNA [NM_145243]	TTATCTACACACCCTTCTCATGGCAATCGAGTTGAGTACTTGGATAGACTTATACCTCAG
A_23_P142631	0.015198785	4.3974543E-4	up	1.901771	FKBP1B	Homo sapiens FK506 binding protein 1B, 12.6 kDa (FKBP1B), transcript variant 2, mRNA [NM_054033]	GGTTGTGCATTTTGTGTGATGCATGTAGTAGCCTTTCCTGATGACAGAACACAGATCTCT
A_23_P345460	0.009646398	1.9792253E-4	up	1.3041631	PLEKHG4	Homo sapiens pleckstrin homology domain containing, family G (with RhoGef domain) member 4 (PLEKHG4), transcript variant 1, mRNA [NM_015432]	GACTTGATGCCTTTTGAATAACTTTCAATAGAATTGTCTAAAATTATCTTACTGGTTGTT
A_21_P0005201	0.009878171	2.0811928E-4	up	4.931908		PREDICTED: Homo sapiens uncharacterized LOC101928211 (LOC101928211), misc_RNA [XR_242337]	TAAGCACATAATTATTCCACTACTTGCCATGTCTTAAATAAAACTGTGTTCCAGAGTCTG
A_23_P144911	0.0065189027	1.0002336E-4	down	-1.6438545	EGFLAM	Homo sapiens EGF-like, fibronectin type III and laminin G domains (EGFLAM), transcript variant 1, mRNA [NM_152403]	ACAGCAGAATGACTGTGTGACCTTGAACTTCACATTTCCCACATTGGCCCTTGGATTGTT
A_23_P159382	0.005389344	7.000147E-5	down	-1.5655277	SEC24D	Homo sapiens SEC24 family member D (SEC24D), mRNA [NM_014822]	GATAATAGGCTAGTTTTGATTTCTTGCTCATTTTCAGAATAACTTTCCAGGAAGAGATGG
A_24_P404033	0.015394619	4.5375005E-4	down	-1.6110041	C15orf38	Homo sapiens chromosome 15 open reading frame 38 (C15orf38), transcript variant 1, mRNA [NM_182616]	CCTTGGAATACTCTTTGAACAAGCTCTGCTAAAACCAAACCCATGACCACTGTGTTGGTG
A_32_P219520	0.0065481183	1.0080317E-4	up	1.4812261	TNFAIP8	Homo sapiens tumor necrosis factor, alpha-induced protein 8 (TNFAIP8), transcript variant 1, mRNA [NM_014350]	TGGCCAGCTATGTCCTCTAGGAAATGACAGACCCAACCACCAGCAATAAACATTTCCATT
A_33_P3305433	0.0033736592	2.193399E-5	down	-2.0287383		AGENCOURT_7892099 NIH_MGC_67 Homo sapiens cDNA clone IMAGE:6139883 5', mRNA sequence [BU159546]	AGATCGTGACCCTCCCACACAGTACAGTAACTTATATACTTACCTGGAAGAACCCGCTTT
A_33_P3251801	0.012453992	3.1786042E-4	up	3.228893	KLRG2	Homo sapiens killer cell lectin-like receptor subfamily G, member 2 (KLRG2), mRNA [NM_198508]	GGAGATTTTCTATGGCCTCAGGCCTGAGTGCCAATATTAGTCTCCAGCTTCTGTGGATGA
A_23_P207507	0.009602833	1.964762E-4	down	-1.4427319	ABCC3	Homo sapiens ATP-binding cassette, sub-family C (CFTR/MRP), member 3 (ABCC3), transcript variant 1, mRNA [NM_003786]	GTAACTGTGCTGAATGCTTTAGATGAGGAAATGATCCCCAAGTGGTGAATGACACGCCTA
A_23_P368145	0.008464406	1.5781407E-4	down	-1.3836281	GORAB	Homo sapiens golgin, RAB6-interacting (GORAB), transcript variant 1, mRNA [NM_152281]	CTGGAATTTATGTGAAGAACCAAACAACTTAAACCAGCATCACTTTTGTCTTCAATTTGC
A_23_P111724	0.0036346668	2.6361524E-5	down	-1.5440607	RUNDC3B	Homo sapiens RUN domain containing 3B (RUNDC3B), transcript variant 1, mRNA [NM_138290]	TGAAATTTTATATTGTTCTGGTACATGTCTGAAATTCTATTGCTTGGAGAGAATCCCCTC
A_24_P106363	0.008893321	1.7019284E-4	up	1.3600233	MARVELD2	Homo sapiens MARVEL domain containing 2 (MARVELD2), transcript variant 1, mRNA [NM_001038603]	CAGCTCGGAGACATAGAGAATATATGGAACAACAGGAGATAAATGAGCCATCATTGTCAT
A_23_P373708	0.012058475	2.9873475E-4	up	1.4483141	KRT18P55	Homo sapiens keratin 18 pseudogene 55 (KRT18P55), non-coding RNA [NR_028334]	ATGGGCTCCACAAGGTCATTGATGACACCAATGTCACTTGGCTGCAGCTGGAAGCAGAGA
A_23_P7582	0.010307133	2.3205874E-4	up	1.4702863	TCF7	Homo sapiens transcription factor 7 (T-cell specific, HMG-box) (TCF7), transcript variant 1, mRNA [NM_003202]	CCCAGAAAACCTCCAGTAGTGGACAACAGGTTTTCACCATAGCCTACGTTAACCCATTTT
A_24_P237927	0.017042955	5.4880086E-4	up	1.2770674	FAM102B	Homo sapiens family with sequence similarity 102, member B (FAM102B), mRNA [NM_001010883]	ACAAAGTCAAGACTTCAGCCTAGATTCCAGTGCGGAAGAAGAAGGACTAAGGCTATTTGT
A_23_P142389	0.005769596	7.907472E-5	up	1.9431252	LSR	Homo sapiens lipolysis stimulated lipoprotein receptor (LSR), transcript variant 2, mRNA [NM_205834]	ACCCGGGACCCTCGGGACAACGGCTCCAGGTCCGGGGACCTCCCCTATGATGGGCGGCTA
A_33_P3240512	0.0078880405	1.3928818E-4	down	-1.6840385	KCTD12	Homo sapiens potassium channel tetramerization domain containing 12 (KCTD12), mRNA [NM_138444]	GCTACTGTTTTCCTTCCTGTGTGTGAAGTAATGAATCATTGATTATGTGACTTGTTATGT
A_23_P200780	0.013371412	3.5735103E-4	down	-1.4423873	TGFBR3	Homo sapiens transforming growth factor, beta receptor III (TGFBR3), transcript variant 1, mRNA [NM_003243]	GGCCCTGAGTTTTACCCAGACTCAAGGAGTTGGTAAAGGGTTAATAGCCAGATAGTAGAA
A_33_P3251198	0.01823432	6.23797E-4	down	-1.1111152	PLCB1	phospholipase C, beta 1 (phosphoinositide-specific) [Source:HGNC Symbol;Acc:15917] [ENST00000404098]	GTGGAAAGGCTCCCCCAAAACATTTTCACCTTCATTTTATAAAGCAAAATAAAATGCTTG
A_23_P144827	0.01359707	3.695453E-4	up	5.903081	FBXL7	Homo sapiens F-box and leucine-rich repeat protein 7 (FBXL7), transcript variant 1, mRNA [NM_012304]	ACAAAGCTGACTGTTCACACTGATTGCCCAGCACATACCGTCTTGCCAGTTTCTTCTTTT
A_23_P114947	0.0013081216	2.044546E-6	up	1.4084563	RGS2	Homo sapiens regulator of G-protein signaling 2, 24kDa (RGS2), mRNA [NM_002923]	TAGATCTGGGATTATGTGGCCTTAGGTAGCTGGTTGTACATCTTTCCCTAAATCGATCCA
A_23_P422911	0.001796813	5.1322836E-6	down	-3.348189	HS6ST3	Homo sapiens heparan sulfate 6-O-sulfotransferase 3 (HS6ST3), mRNA [NM_153456]	TCTGTACAATAATATGTATGAACTCAGTTACTAGGGGACTGTATTGTGACATTATCAACC
A_33_P3233871	0.009051007	1.755295E-4	up	1.4995843	F12	Homo sapiens coagulation factor XII (Hageman factor) (F12), mRNA [NM_000505]	TGCGGCCAGCTCCGCGCCAGGATGGCGCAGGAACTCAATAAAGTGCTTTGAAAATGCTGA
A_33_P3312222	8.903381E-4	6.431517E-7	up	90.9202			AGGATGACAACCCTGCTGTCTTCCATGTCTGAGGAGCAGCTGTCCCGCTACGAAGTGTGT
A_33_P3368695	0.0052488646	6.631038E-5	up	1.9036723	HES7	Homo sapiens hes family bHLH transcription factor 7 (HES7), transcript variant 1, mRNA [NM_001165967]	CGGATAAAAAGGAAAAATTGAAATAAAATCGACTCTGGTGGGATTCGAACCCACAACCTT
A_33_P3360611	5.883739E-4	1.6227277E-7	up	1.6256772	MPP2	Homo sapiens membrane protein, palmitoylated 2 (MAGUK p55 subfamily member 2) (MPP2), transcript variant 9, mRNA [NM_001278381]	TTGAGTTTTCTCACTGATTGGTTTTCTTTCTTTTTCCTTGGATTAAATGTGAAAGCAAAG
A_21_P0011362	0.0057270373	7.822063E-5	up	2.0067222	LOC101059918	Homo sapiens golgin subfamily A member 8R-like (LOC101059918), mRNA [NM_001282484]	GAAAAACAGACCTAGAGTTCCAGCAGGAGTGAACAGGAACAGGAAAACAAATGGCAGTAT
A_23_P427703	0.017447932	5.7152216E-4	up	1.2153893	MT1L	Homo sapiens metallothionein 1L (gene/pseudogene) (MT1L), non-coding RNA [NR_001447]	CTGCTGTGCCTGATGTGGGGACAGACCTGCTCCCAGATGTAAACAGAGCAACCTGCACAA
A_23_P169470	0.009307456	1.8398823E-4	up	1.1439135	CDK9	Homo sapiens cyclin-dependent kinase 9 (CDK9), mRNA [NM_001261]	TTCTTCAACAGGAGAATTTTACTGTGTTTCTTTTGGTTCCATTGTTTGGAGACATTCCTG
A_23_P317324	0.012475264	3.1864922E-4	down	-1.4448329	MECOM	Homo sapiens MDS1 and EVI1 complex locus (MECOM), transcript variant 2, mRNA [NM_005241]	ATGAGGAAAATGGAAGATAATCAATATTCTGAAGCTGAGCTGTCTTCTTTTAGTACTTCC
A_19_P00315773	0.012736736	3.3059937E-4	up	1.4577898	LINC00883	long intergenic non-protein coding RNA 883 [Source:HGNC Symbol;Acc:48569] [ENST00000495228]	AGGAGCAAAGAGAAAGAAGGCAACCAGCTGGCTACTTTCTTCCCTTCTTGGATGCCTCCA
A_33_P3251073	0.007361439	1.249177E-4	up	1.6071733	TMEM52	Homo sapiens transmembrane protein 52 (TMEM52), mRNA [NM_178545]	CAGGGCCACCTGTGACGTCTGCATCTTCTTGGAGAGAGAATAAAGTTTGTATTTAAGTGG
A_23_P102000	0.019776354	7.0661743E-4	down	-1.145802	CXCR4	Homo sapiens chemokine (C-X-C motif) receptor 4 (CXCR4), transcript variant 1, mRNA [NM_001008540]	TGCTGGTTTTTCAGTTTTCAGGAGTGGGTTGATTTCAGCACCTACAGTGTACAGTCTTGT
A_21_P0000069	0.0058788164	8.314207E-5	up	3.4682453	VEPH1	Homo sapiens ventricular zone expressed PH domain-containing 1 (VEPH1), transcript variant 4, mRNA [NM_001167915]	GGGGTATGAAAAACCTGTCTTCATTTGCTTCCAAAAGCAAGAAATGTCTTTTGTTAGATA
A_33_P3405789	0.012315131	3.110555E-4	down	-1.2692915	TULP3	Homo sapiens tubby like protein 3 (TULP3), transcript variant 1, mRNA [NM_003324]	TACACGACAGCATGTGGGGAAGGACTTATGGTGGGCCAGGTGGACCTCATCCTGCTTCTT
A_23_P324523	0.0140413055	3.8922534E-4	up	1.1924285	IQCK	Homo sapiens IQ motif containing K (IQCK), mRNA [NM_153208]	AGATCCGAAAGCCTAGTAGTTAGTTGCACTGGGTTGTTTTGACAAGCTACCACACGTCTT
A_32_P524014	0.015495946	4.578109E-4	down	-1.6874956	UTRN	Homo sapiens utrophin (UTRN), mRNA [NM_007124]	CTGCCTGTATTTGTATGCAAAATGTCCTCTATCTGCTATTAAAGAAAAGCTACGTAAAAC
A_23_P59877	0.0047154357	5.129254E-5	up	1.1548994	FABP5	Homo sapiens fatty acid binding protein 5 (psoriasis-associated) (FABP5), mRNA [NM_001444]	ATAACAAGAAAATTGAAAGATGGGAAATTAGTGGTGGAGTGTGTCATGAACAATGTCACC
A_33_P3218252	0.018221347	6.226525E-4	up	1.0947168	SMG1	Homo sapiens SMG1 phosphatidylinositol 3-kinase-related kinase (SMG1), mRNA [NM_015092]	GTCCTGTTCTGAAATAAAACATGAGGCTTTTAAGAATCATGTGTTCAATGTAGACAATGC
A_23_P132175	0.009871443	2.064127E-4	up	1.4099427	RTN4R	Homo sapiens reticulon 4 receptor (RTN4R), mRNA [NM_023004]	CTCCCACCCAGATCGCGGTATATAGAGATATGCATTTTATTTTACTTGTGTAAAAATATC
A_23_P60166	0.0018310791	5.3491276E-6	down	-3.0567987	DEPTOR	Homo sapiens DEP domain containing MTOR-interacting protein (DEPTOR), transcript variant 1, mRNA [NM_022783]	GGGGGTAGTTAGGGAGAGACTACATGAAATGGTGTGCCCCTATTTTCTTTCTGATCCTAA
A_21_P0005953	0.012389341	3.137607E-4	up	1.7951611	XLOC_006934	BROAD Institute lincRNA (XLOC_006934), lincRNA [TCONS_00015370]	CCCCAAACAATACCACAAGTTACTCCAGGGCATATTCTGTTTATAATTTTGAAATGTCAG
A_24_P403734	0.009339425	1.849759E-4	up	1.3904207	ZNF385A	Homo sapiens zinc finger protein 385A (ZNF385A), transcript variant 3, mRNA [NM_015481]	GGGGTCTGGCCTACACTGGTCTTCCCCTTCCCATCAACTCTTTCTGCTTGACAATGTAGC
A_33_P3338559	0.005395294	7.101214E-5	down	-1.2910005	RBBP4	Homo sapiens retinoblastoma binding protein 4 (RBBP4), transcript variant 1, mRNA [NM_005610]	TCTCCATGACTAACTGTGTAAGTGCTTAAAATGGAATAAATTGCTTTTCTACATAACCCC
A_23_P160869	0.019621702	6.9725316E-4	down	-1.183186	LRIG2	Homo sapiens leucine-rich repeats and immunoglobulin-like domains 2 (LRIG2), mRNA [NM_014813]	ATTGCCCTAGTCTTCAGAATGGTCCTGAGAAAACATCACTACTTCGATGTTCTACTTTGC
A_23_P99063	0.016945692	5.420071E-4	up	1.2405797	LUM	Homo sapiens lumican (LUM), mRNA [NM_002345]	TTTTTATTTCTACTGTCAAATGATGTGCAAAACCTTTTACTGGTTGCATGGAAATCAGCC
A_33_P3888629	0.016788626	5.3470547E-4	down	-1.4443941	MECOM	Homo sapiens MDS1 and EVI1 complex locus (MECOM), transcript variant 6, mRNA [NM_001164000]	TTTTGAAATAATCAGCAAGTTGAGGTACTTTCTTCAAATGCTTTGTACAATATAAACTGT
A_19_P00320517	0.016879333	5.392578E-4	up	1.3585181	C17orf51	Homo sapiens chromosome 17 open reading frame 51 (C17orf51), mRNA [NM_001113434]	GCATGCCCTCTTCTTTGAAAACCTGTTGAGCAAATGCCTCCGCATTTTATGCACCTTCAA
A_23_P209625	0.0021284928	8.000575E-6	down	-3.0985298	CYP1B1	Homo sapiens cytochrome P450, family 1, subfamily B, polypeptide 1 (CYP1B1), mRNA [NM_000104]	CTGTGTTTATATGGAAGAAAGTAAGGTGCTTGGAGTTTACCTGGCTTATTTAATATGCTT
A_23_P162322	0.0152350385	4.440888E-4	up	1.717515	WNT10B	Homo sapiens wingless-type MMTV integration site family, member 10B (WNT10B), mRNA [NM_003394]	TTTGGAGCCATAAGATCTGTATCTAGAAAGAGATCACCCACTCCTATGTACTATCCCCAA
A_24_P409661	0.016203025	5.007509E-4	up	1.1435486			GGTCATTTTTGCTTTCTTCGTTTTGAAGAACTTCAACCCCACAGTGAACTACATTTTGTC
A_33_P3213029	0.013912708	3.8251103E-4	up	2.1411967	RNF43	Homo sapiens ring finger protein 43 (RNF43), mRNA [NM_017763]	GGGTATTTATATCTGAACCAGACAGACGCTTGAATCAGGCACTATGTTAAGAAATATATT
A_24_P223124	0.013912708	3.824826E-4	up	1.3316087	FNDC3B	Homo sapiens fibronectin type III domain containing 3B (FNDC3B), transcript variant 1, mRNA [NM_022763]	CTCACTGTTGGACATACATTCCAAGCTTTTCAACTCTAGGAGAAAAAGAAAATCATGTTT
A_23_P93169	8.903381E-4	5.9494977E-7	down	-3.253676	LGSN	Homo sapiens lengsin, lens protein with glutamine synthetase domain (LGSN), transcript variant 1, mRNA [NM_016571]	AGTCATTTCCTATGTGTATGTTGACCTGGATAAGAATATCCAATTTTGGGTGGCAATAAA
A_33_P3344831	0.008774543	1.6515281E-4	down	-1.6689296	TMEM45A	Homo sapiens transmembrane protein 45A (TMEM45A), mRNA [NM_018004]	CTACTATTTGTAACTCCTTGACCATGGAATTATACTTGTTTATCTTGTTGCTGCAATGAG
A_23_P256542	0.003475241	2.3561419E-5	up	1.1737156	FAM162A	Homo sapiens family with sequence similarity 162, member A (FAM162A), mRNA [NM_014367]	CGTGCCTGTATTAAAAAGGATGTGGTATGAGGATCCATTTCATAAAGTATGATTTGCCCA
A_33_P3344482	0.010330964	2.3292974E-4	up	1.3356689	FERMT2	Homo sapiens fermitin family member 2 (FERMT2), transcript variant 3, mRNA [NM_001135000]	GCAACATGAAACAGTGGAATGTCAACTGGGAAATCAAAATGGTAAACTCATAACAATGTT
A_19_P00315753	0.004902193	5.4877815E-5	up	1.4143087	LINC00883	Homo sapiens long intergenic non-protein coding RNA 883 (LINC00883), transcript variant 1, long non-coding RNA [NR_028301]	GGACATTCCTGTATGTTGTATGAGGCCCTGTCTTAACAGAAATAGTGATGTCATCATCAT
A_23_P47614	0.0015953433	4.2761326E-6	up	1.2799017	PHLDA2	Homo sapiens pleckstrin homology-like domain, family A, member 2 (PHLDA2), mRNA [NM_003311]	TTTATTTCGCTGGTTCTTTGTAGTCACATATTTTATAGTCTTAATATCTTGTTTTTGCAT
A_33_P3410409	0.008174477	1.4966966E-4	down	-1.2805637	LAMP2	Homo sapiens lysosomal-associated membrane protein 2 (LAMP2), transcript variant C, mRNA [NM_001122606]	ATAAATACCTTTGATCTAAGGGTTCAGCCTTTCAATGTGACACAAGGAAAGTATTCTACA
A_32_P41065	0.009646398	1.9810296E-4	up	1.5878562	TMCC1	Homo sapiens transmembrane and coiled-coil domain family 1 (TMCC1), transcript variant 1, mRNA [NM_001017395]	GTATGTCGTGTATGCTAGGTGATATCCTCAGTAGGGATTGACTACTAGACTGTGTGTTTT
A_33_P3422802	0.014432019	4.0731294E-4	up	1.6513331	ULBP1	Homo sapiens UL16 binding protein 1 (ULBP1), mRNA [NM_025218]	CTCTGCACTATGAACCCAAACCCAGCTCAAAAAGATAAAATCTAGTCATTTAAGATAATC
A_33_P3367692	0.012001041	2.9565624E-4	down	-1.852901	CFH	Homo sapiens complement factor H (CFH), transcript variant 2, mRNA [NM_001014975]	GGCTACAAGATTGAAGGAGATGAAGAAATGCATTGTTCAGACGATGGTTTTTGGAGTAAA
A_23_P86599	0.002395751	1.0151687E-5	down	-1.8412657	DMBT1	Homo sapiens deleted in malignant brain tumors 1 (DMBT1), transcript variant 2, mRNA [NM_007329]	CCCAGAATCCATGCTTCTCATCTGCAAAATGAAAATGTCAATACTTACTTCTTAGCACTG
A_33_P3480395	0.0011306227	1.6043839E-6	down	-9.499663	FLJ30901	Homo sapiens cDNA FLJ30901 fis, clone FEBRA2005778. [AK055463]	GCCACAAATATTCAGTTTTGTTTTATCCATCATGTCCCCCATATGCATGTAATGAAACAT
A_33_P3408898	0.01292517	3.399146E-4	down	-1.2777897	C6orf226	Homo sapiens chromosome 6 open reading frame 226 (C6orf226), mRNA [NM_001008739]	GGTTTTGCATTTACATTTGTGGACCATGTTACAGTTAAGAAAAATCCTGTTTCAGTCCTT
A_23_P1170	0.016077131	4.9335015E-4	up	1.7176204	ZFAND4	Homo sapiens zinc finger, AN1-type domain 4 (ZFAND4), transcript variant 1, mRNA [NM_174890]	GTGGAAACAACTTCTGTGCATCTCATCGTTATGCAGAAACTCATGGCTGTACCTATGATT
A_23_P102611	0.005493793	7.3410825E-5	up	1.5734087	WISP2	Homo sapiens WNT1 inducible signaling pathway protein 2 (WISP2), mRNA [NM_003881]	CATTTTTCTGGGGGTAGGATGAAGAGAAGGCACACAGAGATTCTGGATCTCCTGCTGCCT
A_24_P148796	0.003475241	2.3560438E-5	down	-1.2997968	MST1	Homo sapiens macrophage stimulating 1 (hepatocyte growth factor-like) (MST1), mRNA [NM_020998]	GGCCCACTTGCCTGCTTTACCCACAACTGCTGGGTCCTGGAAGGAATTATAATCCCCAAC
A_33_P3348752	0.010462052	2.3712253E-4	up	1.3116457	HSPH1	Homo sapiens heat shock 105kDa/110kDa protein 1 (HSPH1), transcript variant 1, mRNA [NM_006644]	GATAAAAAGGAAGAAGATTTAGAAGACAAAAACAATTTTGGTGCTGAACCTCCACATCAG
A_23_P29953	0.0058179153	8.037917E-5	down	-1.0429833	IL15	Homo sapiens interleukin 15 (IL15), transcript variant 2, mRNA [NM_172175]	CTGTGTGGAACCACTGACTACTGGCTCTCATTGACTTCCTTACTAAGCATAGCAAACAGA
A_23_P77430	0.017922908	5.9944374E-4	down	-1.2364434	PRMT7	Homo sapiens protein arginine methyltransferase 7 (PRMT7), transcript variant 1, mRNA [NM_019023]	GTGGAGTTTCACCCCGACACAGGCGACATCATCATGGAGTTCAGGCATGCAGATACCCCA
A_32_P120895	0.0054918407	7.316826E-5	up	1.3211749	LYSMD2	Homo sapiens LysM, putative peptidoglycan-binding, domain containing 2 (LYSMD2), transcript variant 1, mRNA [NM_153374]	AGTGATTAGTTCCCTCTGGCTTTCTATAATTTTAAGTCTTTATTATGGCATGATGGCAAG
A_33_P3384432	0.008334222	1.537443E-4	up	1.3202474	TFDP2	Homo sapiens transcription factor Dp-2 (E2F dimerization partner 2) (TFDP2), transcript variant 1, mRNA [NM_001178138]	TGTTCGTTCAATGATGAAGATGAGGAAGATGATGAGGAGGATTCCTCCTCCCCAGAATAA
A_23_P35456	0.0035681324	2.5274216E-5	down	-1.8966779	SH3PXD2A	Homo sapiens SH3 and PX domains 2A (SH3PXD2A), mRNA [NM_014631]	ACTTTCCAGGTGTCCTTTATCACTTTGACGGGACTCTTTGGTCTGCAGAAAATGCTCTGT
A_19_P00813140	0.015573894	4.6378828E-4	down	-1.2660089	LINC00313	long intergenic non-protein coding RNA 313 [Source:HGNC Symbol;Acc:16416] [ENST00000427188]	GCTGTGCCCAGTGGGATGTTGTCAGAGAATGGACCTGGCTGCTGGGAAAGGTGATTGTGT
A_33_P3221748	8.9715177E-4	8.085826E-7	down	-1.7362585	RUNX3	Homo sapiens runt-related transcription factor 3 (RUNX3), transcript variant 1, mRNA [NM_001031680]	GGCACACACCTGTCTGTAACCTGTTTTGTGCTCTGAAAGCAAATAGTCCTGAGCAAAAAA
A_24_P278299	0.015934998	4.8333555E-4	down	-1.1957711	ASB13	Homo sapiens ankyrin repeat and SOCS box containing 13 (ASB13), transcript variant 1, mRNA [NM_024701]	TTGTCATGGCGGGTCTTCGTCCTAAACTGAGAAGAAAAGCATTCCTGTTTGATCACCGCC
A_23_P110212	8.903381E-4	6.1592783E-7	up	1.9769435	ACSL1	Homo sapiens acyl-CoA synthetase long-chain family member 1 (ACSL1), transcript variant 1, mRNA [NM_001995]	ACTCGGTTCTCCAGGCCTGATTCCCCGACTCCATCCTTTTTCAGGGTTATTTAAAAATCT
A_23_P167479	0.0118246265	2.868822E-4	up	2.191295	IL17B	Homo sapiens interleukin 17B (IL17B), mRNA [NM_014443]	CTGGCCCAGAGAAAGTGTGAGGTCAACTTGCAGCTGTGGATGTCCAACAAGAGGAGCCTG
A_24_P67534	0.005001551	5.8295285E-5	down	-1.3865792	SMIM10	Homo sapiens small integral membrane protein 10 (SMIM10), mRNA [NM_001163438]	GATTCTCAACGTCCACCTGCAGGTATATATTTAGAGCCACTAACTTTGTGGCATTTGGGG
A_19_P00318539	0.016945692	5.4204575E-4	up	1.265916	XLOC_009378	BROAD Institute lincRNA (XLOC_009378), lincRNA [TCONS_00019580]	GCAAAGGTTTTCAGTCCTAGTCCATCATGACCACATAGCTGGAATACACTTATTTCACTT
A_24_P778906	0.004077527	3.664543E-5	up	3.1536744	ANKRD20A12P	Homo sapiens ankyrin repeat domain 20 family, member A12, pseudogene (ANKRD20A12P), non-coding RNA [NR_046228]	TCAAGCCTCAGACTTCAAATAATTGCCAGAACTACTTGACTGAGGTTAGTTATATGACCG
A_23_P58706	0.016968282	5.4343714E-4	down	-1.3747692	SPINK13	Homo sapiens serine peptidase inhibitor, Kazal type 13 (putative) (SPINK13), mRNA [NM_001040129]	CATCCCTATGCTGTACTTAAATGTCGAACAAAATGAGAGACAAAAATGAAGGAATCAAAC
A_32_P86763	0.007901987	1.4047562E-4	down	-2.2071157	TGM2	Homo sapiens transglutaminase 2 (TGM2), transcript variant 1, mRNA [NM_004613]	CTCCACACCAGTGGCCTCGTGGTTATTAGCAAGGCTGGGTAATGTGAAGGCCCAAGAGCA
A_32_P126311	0.012898839	3.3882528E-4	up	1.1498935	SLC38A9	Homo sapiens solute carrier family 38, member 9 (SLC38A9), transcript variant 1, mRNA [NM_173514]	GGTGGATTTATTTTGCCTGCAGTAAAGATTCTCAGGGTGTCAGAGCAGCATATTGTCAAA
A_23_P319792	0.010801527	2.4992594E-4	up	1.2150013	XRN1	Homo sapiens 5'-3' exoribonuclease 1 (XRN1), transcript variant 1, mRNA [NM_019001]	ATCTTTACATTGTCTGCCAATTAAAGTGTTTTAAACTTGCATTGGAATGGACTCCGAATG
A_23_P1292	0.018482575	6.375821E-4	up	1.2892919	ERCC6	Homo sapiens excision repair cross-complementing rodent repair deficiency, complementation group 6 (ERCC6), mRNA [NM_000124]	GCTAAACAACATTGCTTCCTAAACTTTCAAGTCCCTTTTTCTAACGGGCATTTCTGATTA
A_33_P3396214	0.0038062758	3.0231757E-5	up	2.377218	KREMEN2	Homo sapiens kringle containing transmembrane protein 2 (KREMEN2), transcript variant 4, mRNA [NM_172229]	CAGGTCAGCAAAAACAGTCAAAAAACCCCCACAGATTTTGAATAAAGGATCTACTTTGGT
A_23_P23303	0.009966602	2.119467E-4	up	1.1836364	EXO1	Homo sapiens exonuclease 1 (EXO1), transcript variant 3, mRNA [NM_003686]	AAGCATCCAGAAGAGAAAGCATCATAATGCCGAGAACAAGCCGGGGTTACAGATCAAACT
A_23_P388433	0.0050319075	5.997183E-5	down	-1.3138571	C4orf3	Homo sapiens chromosome 4 open reading frame 3 (C4orf3), transcript variant 1, mRNA [NM_001170330]	TCTGGTAAACTCTCTGTATATCTTCCTACCTTTCAAAATCGTTCTTAGGGTTAGTCAAGT
A_23_P127891	0.0077614477	1.3510263E-4	down	-2.2712154	BDNF	Homo sapiens brain-derived neurotrophic factor (BDNF), transcript variant 1, mRNA [NM_170735]	AGGTTCAAGAGGCTTGACATCATTGGCTGACACTTTCGAACACGTGATAGAAGAGCTGTT
A_33_P3387458	0.013760394	3.7588258E-4	down	-4.437822	SFMBT2	Scm-like with four mbt domains 2 [Source:HGNC Symbol;Acc:20256] [ENST00000379713]	GGATGATGGTGTGAAAAAATATTATCTTCTGCTGTCATCTGTTTCCATGAGAACCTTAAA
A_24_P224727	0.007107877	1.1655243E-4	up	2.5655377	CEBPA	Homo sapiens CCAAT/enhancer binding protein (C/EBP), alpha (CEBPA), transcript variant 1, mRNA [NM_004364]	GCCTTGTTTGTACTGTATGCCTTCAGCATTGCCTAGGAACACGAAGCACGATCAGTCCAT
A_23_P120883	0.013308114	3.5461027E-4	down	-1.2104901	HMOX1	Homo sapiens heme oxygenase (decycling) 1 (HMOX1), mRNA [NM_002133]	TGGGGAGGGAGGTGTTTAACGGCACTGTGGCCTTGGTCTAACTTTTGTGTGAAATAATAA
A_33_P3379456	0.0064382586	9.70208E-5	down	-2.1025758	SH3YL1	Homo sapiens SH3 and SYLF domain containing 1 (SH3YL1), transcript variant 4, mRNA [NM_001282687]	CATTTCCAGCAGTAGCATAAACTTACGGTGACATGGTAGACTTGTCTCTAAATAAAATTT
A_23_P139722	0.0025523647	1.1975314E-5	down	-1.6618614	TNFRSF1A	Homo sapiens tumor necrosis factor receptor superfamily, member 1A (TNFRSF1A), mRNA [NM_001065]	TTGTTTTGTTTTGTTTTGTTTTTAAATCAATCATGTTACACTAATAGAAACTTGGCACTC
A_33_P3306146	0.005017074	5.9351132E-5	up	2.1916995	PLAU	Homo sapiens plasminogen activator, urokinase (PLAU), transcript variant 2, mRNA [NM_001145031]	TATAACGATCCCCAGTTTGGCACAAGCTGTGAGATCACTGGCTTTGGAAAAGAGAATTCT
A_23_P200792	0.014264185	4.0004603E-4	up	1.1147119	NOTCH2	Homo sapiens notch 2 (NOTCH2), transcript variant 1, mRNA [NM_024408]	GGCCCCCACTAATAAGTGGTACTATGGTTACTTCCTTGTGTACATTTCTCTTAAAAGTGA
A_23_P120744	0.014578076	4.137824E-4	up	1.1264911	MCM3AP	Homo sapiens minichromosome maintenance complex component 3 associated protein (MCM3AP), mRNA [NM_003906]	CCCTCTATCTTCCTCAGACTCTAGTGTCTCTTTCTCACACTATTGAACCTGTGATGAAAA
A_23_P74278	0.0065859207	1.0228238E-4	down	-2.9460108	PDE4B	Homo sapiens phosphodiesterase 4B, cAMP-specific (PDE4B), transcript variant d, mRNA [NM_001037341]	GGAAACACTACATTTGCTCACAGATGATTCTTCTGAATGCTCCCGAACTACTGACTTTGA
A_23_P215060	0.0029530893	1.7344068E-5	up	1.5479931	PODXL	Homo sapiens podocalyxin-like (PODXL), transcript variant 1, mRNA [NM_001018111]	CAGGAACTGGGGGATCATATATGTCTTAGTGGACAGGGGTCTGAAGTACACTGGAATTTA
A_23_P35591	0.014767973	4.2227237E-4	up	1.2262928	EXOSC1	Homo sapiens exosome component 1 (EXOSC1), mRNA [NM_016046]	AGTACAACCCGAATTCTTGCAGACCTAAGAAGCCACTTTTTACCCTATGGAAGGGGGTAA
A_21_P0010983	0.002391624	9.992792E-6	up	2.12805	LOC100505504		ATTATGAGTCTGGGATTTTCTGAAATTGAGCATTTTGGCCAGGCTGTGGGGTCCCTCTAT
A_21_P0014920	0.016197504	4.9937726E-4	up	1.1212004		HESC3_16_A11.g1_A036 Human embryonic stem cells Homo sapiens cDNA clone IMAGE:7476792 5', mRNA sequence [CX782743]	GCCTTCCCATTCCTTTGTCTTGGTCCTTTGTGCATATGGAACAGTTCTATTATTAAATTT
A_23_P151805	0.0015354342	3.7454504E-6	down	-1.8457772	FBLN5	Homo sapiens fibulin 5 (FBLN5), mRNA [NM_006329]	GGGAACCCTGGGAGTAGCTAGTTTGCTTTTTGCGTACACAGAGAAGGCTATGTAAACAAA
A_33_P3626709	0.018036911	6.0797523E-4	up	1.4271281	LOC100129280	Homo sapiens cDNA FLJ44650 fis, clone BRACE2039607. [AK126613]	CAGGTTTGTGGTGAAGATTAAACACTTAGAGAAAACATAAAATGCCTCTTGTGAAGTAAG
A_33_P3389728	0.016472165	5.171595E-4	down	-1.7230859	NR5A2	Homo sapiens nuclear receptor subfamily 5, group A, member 2 (NR5A2), transcript variant 1, mRNA [NM_205860]	GTATCAATGAAATACATATTGTCATGTCAGTTCTTGCCAGGAACTTCTCAACAAAATGGA
A_21_P0000697	0.016066002	4.918522E-4	down	-4.6278462	LOC100505912	Homo sapiens uncharacterized LOC100505912 (LOC100505912), long non-coding RNA [NR_037877]	AATGGAGAAATGCTAACTTACAGAAAGGTCAGGTTGGTGTTTGAATGGTTTTAATTTCCT
A_23_P337934	0.015899146	4.8037333E-4	up	2.4225311	FBLIM1	Homo sapiens filamin binding LIM protein 1 (FBLIM1), transcript variant 1, mRNA [NM_017556]	GTTGCTTTATCACTTCTAAGACATTTTGTACGGCACGGACAAGTTAAACAGAATGTGCTT
A_33_P3421913	0.0033736592	2.188927E-5	up	2.158769	CADM1	Homo sapiens cell adhesion molecule 1 (CADM1), transcript variant 1, mRNA [NM_014333]	GTAAGAAACTCCATATCCATATGTTCCCATTCGCATTTTGTATTGGTTCATGTATACCAT
A_21_P0011024	0.015956953	4.8431597E-4	up	1.2460194	NEAT1	Homo sapiens nuclear paraspeckle assembly transcript 1 (non-protein coding) (NEAT1), long non-coding RNA [NR_028272]	ATGGCAGGTCTAGTTTGGGCATTGTGATTGCATTGCAGATTACTAGGAGAAGGGAATGGT
A_23_P62901	0.01686541	5.3814816E-4	up	1.7179393	BTG2	Homo sapiens BTG family, member 2 (BTG2), mRNA [NM_006763]	TTTTAGAAGCAGCCTCATGGTCTCATGCTTAATCTTGTCTCTCTTCTCTTCTTTATGATG
A_33_P3359157	0.013898261	3.81566E-4	up	1.2452133	FAM189B	Homo sapiens family with sequence similarity 189, member B (FAM189B), transcript variant 3, mRNA [NM_001267608]	TTCCTCCAGATATCCAGGAAAGCCCCAGACCCCAGTGGGACTGGAGCTCATGGACATAAG
A_33_P3236218	8.903381E-4	6.238173E-7	up	90.83147			GACATGTGTGAGATGTGGGGAGAAATGCCCCCATTGCAGCCCATGGATTTAAGGGAGGCT
A_23_P103433	0.0037125174	2.868122E-5	down	-1.9924252	OSCP1	Homo sapiens organic solute carrier partner 1 (OSCP1), transcript variant 1, mRNA [NM_145047]	CCCATGGCCCAGAATGATGCTGCTAGTTTTCTACTGAGTGAAGCCATTACGTCTATTTCT
A_33_P3358342	0.0090676695	1.7665584E-4	up	1.251081	SIAH2	Homo sapiens siah E3 ubiquitin protein ligase 2 (SIAH2), mRNA [NM_005067]	CATATGCTTGCTATTTAAAGCTGTGTGTTGGTTTTGTTTTTCTGCCACATTCACTAGTTT
A_33_P3393655	0.01413036	3.9322945E-4	up	3.768906	LGI2	Homo sapiens leucine-rich repeat LGI family, member 2 (LGI2), mRNA [NM_018176]	CTCAAAGGCTGGTCTGTCCACAGTTTATAAATGGAACAGCAAAGGATTCTATTCTTACCA
A_24_P113131	0.01292517	3.4007573E-4	up	2.3358216	BZRAP1	Homo sapiens benzodiazapine receptor (peripheral) associated protein 1 (BZRAP1), transcript variant 1, mRNA [NM_004758]	GGGTGTGGAATGGTGGGGGAATTTGTTTAAAAAGACATTTTATTATAATAAAGTCTATTT
A_32_P171313	0.0037125174	2.8513616E-5	up	1.293957	GNB4	Homo sapiens guanine nucleotide binding protein (G protein), beta polypeptide 4 (GNB4), mRNA [NM_021629]	GATTTAACTGTTCTTAGATCTTTCTTACACAGTGATTCATTCCTCTATTTGTACAGTGGC
A_21_P0014747	0.002060766	7.1475697E-6	down	-1.9056894		PREDICTED: Homo sapiens uncharacterized LOC101927895 (LOC101927895), transcript variant X1, misc_RNA [XR_241220]	GCCTTCAAAGTTGGAAAAAATATCAGGATTTTCTTTCTGGTCACTGGAAAAATATATCCG
A_23_P406025	0.011716369	2.8250186E-4	down	-1.5028839	PRUNE2	Homo sapiens prune homolog 2 (Drosophila) (PRUNE2), mRNA [NM_015225]	TGCATTGGATTGCTCAGAATAAAGTGTCTGTTAGACTTCGTTTTGGTAAATAAATTCTCC
A_23_P110791	4.478793E-5	2.6481362E-9	up	4.324072	CSF1R	Homo sapiens colony stimulating factor 1 receptor (CSF1R), mRNA [NM_005211]	ATCCTAACTAACAGTCACGCCGTGGGATGTCTCTGTCCACATTAAACTAACAGCATTAAT
A_23_P201711	0.010133533	2.1995814E-4	down	-1.2475983	S100A6	Homo sapiens S100 calcium binding protein A6 (S100A6), mRNA [NM_014624]	TTGGCTCGAAGCTGCAGGATGCTGAAATTGCAAGGCTGATGGAAGACTTGGACCGGAACA
A_19_P00322929	0.00763574	1.321307E-4	down	-1.5311297	LOC100507376	PREDICTED: Homo sapiens uncharacterized LOC100507376 (LOC100507376), transcript variant X2, misc_RNA [XR_241662]	TAGTTTAAGGAAATATCTGACGCTGATAACCATGTCCCAAGCACTGCTCTAAGTTCCCAA
A_23_P18325	0.016879333	5.3922384E-4	up	1.3460588	PDCD10	Homo sapiens programmed cell death 10 (PDCD10), transcript variant 1, mRNA [NM_007217]	CCAACCGACTAATTCATCAAACCAACTTAATACTTCAGACCTTCAAAACTGTGGCCTGAA
A_33_P3278362	0.0036645783	2.6795138E-5	up	1.9302487	ANKRD2	Homo sapiens ankyrin repeat domain 2 (stretch responsive muscle) (ANKRD2), transcript variant 1, mRNA [NM_020349]	AGCTAACTGAGGGCCCAGCCTTTTTTCTGCATGATCCAGGAGCACATACCACAAACTACC
A_32_P141238	0.007868203	1.3847939E-4	up	1.660644	ANO2	Homo sapiens anoctamin 2 (ANO2), transcript variant 2, mRNA [NM_001278597]	AAACCTGGGCTTGTCTCCACTTCACGTCACAAAAACGTTTGGAGCTAAATGCAGATAACC
A_23_P361049	0.018555218	6.414366E-4	down	-1.7176838	MYO1B	Homo sapiens myosin IB (MYO1B), transcript variant 2, mRNA [NM_012223]	CAAATTGTTTCTTATTTGGGAGGATAATGTATATACATTGGTATTATGTTAAATAATAAA
A_24_P30206	0.005389344	7.0296206E-5	up	1.1759033	BCCIP	Homo sapiens BRCA2 and CDKN1A interacting protein (BCCIP), transcript variant B, mRNA [NM_078468]	ACAATTCCAAAAAGAAACCTAGCAACAAAAAGAAAGCTGCGTTAATGTTTGCAAATGCAG
A_23_P10025	0.0078140395	1.3699706E-4	down	-1.9743254	NELL2	Homo sapiens NEL-like 2 (chicken) (NELL2), transcript variant 2, mRNA [NM_006159]	ACATCACCATGTAGAAGAATGGGCGTACAGTATATACCGTGACATCCTGAACCCTGGATA
A_24_P378987	0.0042528436	4.1727595E-5	down	-1.2705305	DHRSX	Homo sapiens dehydrogenase/reductase (SDR family) X-linked (DHRSX), mRNA [NM_145177]	AACCTCTGCAGAACTTCAAGAAGCCAAATAAACATTTTGGAGGATAATCACCCCAAGTGG
A_23_P6624	0.004213488	4.085686E-5	up	1.3082268	UMPS	Homo sapiens uridine monophosphate synthetase (UMPS), transcript variant 1, mRNA [NM_000373]	TTTGAGTAGACTTGGTGTTTGAGTGCTTCAGATACATTTTTCAGATACAATGTGAAGACA
A_33_P3390778	0.018036911	6.099819E-4	up	1.4901747	TRIM46	Homo sapiens tripartite motif containing 46 (TRIM46), transcript variant 2, mRNA [NM_001256599]	GTTATTGTCATGGTTTATAAACAATAAACTGTGATGCCAGGCACATCTCTGCCTTCCCTG
A_33_P3374443	0.01267774	3.2831848E-4	up	1.506946	L1CAM	Homo sapiens L1 cell adhesion molecule (L1CAM), transcript variant 2, mRNA [NM_024003]	AACTTTGCTCAGAGGTTCCAGGGCATCTACCGCTGCTTTGCCAGCAATAAGCTGGGCACC
A_33_P3234118	0.0029530893	1.7340548E-5	up	1.210764	FAM122B	Homo sapiens family with sequence similarity 122B (FAM122B), transcript variant 2, mRNA [NM_001166599]	GCTTTTGGAATAATAGGAAGTTTTGTGAAATGCTGGCCTTGTGTATATCTTAGAATGCAA
A_23_P306479	0.01712922	5.533178E-4	up	1.6836793	ZBTB11-AS1	Homo sapiens ZBTB11 antisense RNA 1 (ZBTB11-AS1), long non-coding RNA [NR_024407]	TCCAGAGGGTTAGGAGTCCGTTTTTACGTTTGAGACTCCCAACATCATAAAAGCATATTT
A_23_P112159	0.0101880245	2.2486079E-4	up	1.2277685	AGO2	Homo sapiens argonaute RISC catalytic component 2 (AGO2), transcript variant 1, mRNA [NM_012154]	TTCCAGAATGCCTTCCGTCCCAGATTTCAAACTTGGATTTTGAACTGCAGACCTGTATGA
A_24_P402588	8.9715177E-4	9.484432E-7	up	2.7279367	BCL11A	Homo sapiens B-cell CLL/lymphoma 11A (zinc finger protein) (BCL11A), transcript variant 2, mRNA [NM_018014]	CCCCAACCCCTTGTTTCTATACATTCTATGTTGTCTTTTAAAAAGTGTGCTTAACATTGA
A_23_P253536	0.017954074	6.0284935E-4	up	1.2141265	NPR3	Homo sapiens natriuretic peptide receptor C/guanylate cyclase C (atrionatriuretic peptide receptor C) (NPR3), transcript variant 2, mRNA [NM_000908]	GGCTTGCTAATGGCCTTCTACTTTTTCAGGAAGAAATACAGAATAACCATTGAGAGGCGA
A_24_P354689	0.0070227194	1.1374522E-4	down	-1.834848	SPOCK1	Homo sapiens sparc/osteonectin, cwcv and kazal-like domains proteoglycan (testican) 1 (SPOCK1), mRNA [NM_004598]	CTTTTTCTCAAAGTCACTGATGTTTGTTCCTGTTAAATGTATAGCATTGTAATGAGAGCC
A_23_P252062	0.002060766	7.091217E-6	down	-11.075045	PPARG	Homo sapiens peroxisome proliferator-activated receptor gamma (PPARG), transcript variant 3, mRNA [NM_138711]	CCAAGGCTTCATGACAAGGGAGTTTCTAAAGAGCCTGCGAAAGCCTTTTGGTGACTTTAT
A_23_P102890	0.010186542	2.2337072E-4	up	1.2728798	MRPS6	Homo sapiens mitochondrial ribosomal protein S6 (MRPS6), mRNA [NM_032476]	GTGAGCTAGTCATTCAGCCTGTGTAACCATGTGGAAATAAAAATTGACGACCAATGTATT
A_23_P408095	0.008265143	1.518184E-4	up	1.1217358	DSTN	Homo sapiens destrin (actin depolymerizing factor) (DSTN), transcript variant 2, mRNA [NM_001011546]	GCTAGGACACCTGTGGTATCTTTAATTGTATCTCCTTCAGAAGTTTGCTTCTTATGGTAT
A_33_P3362869	8.9715177E-4	9.60286E-7	up	1.3411407	DNAJC19	Homo sapiens DnaJ (Hsp40) homolog, subfamily C, member 19 (DNAJC19), transcript variant 2, mRNA [NM_001190233]	CAGGATTTGCAGGCCGTTATGTTTTGCAAGCCATGAAGCATATGGAGCCTCAAGTAAAAC
A_24_P353619	0.004561502	4.755814E-5	down	-2.3490393	ALPL	Homo sapiens alkaline phosphatase, liver/bone/kidney (ALPL), transcript variant 1, mRNA [NM_000478]	GCTACAAGGTGGTGGGCGGTGAACGAGAGAATGTCTCCATGGTGGACTATGCTCACAACA
A_32_P117464	0.0063972296	9.605726E-5	up	1.5405048	MB21D2	Homo sapiens Mab-21 domain containing 2 (MB21D2), mRNA [NM_178496]	AGCTTTATACATGTTGACCCCATCTAAAGCTGGGGAAAATATACACTTGATGAAGTAGGT
A_23_P166716	0.0022822043	9.220755E-6	up	1.3244286	TRMT10C	Homo sapiens tRNA methyltransferase 10 homolog C (S. cerevisiae) (TRMT10C), mRNA [NM_017819]	TCTTTCCCAACTGACTGTAGGGTTGTGTCTTTTCCCAATTAAATATCTGCAGAACTTTGG
A_21_P0005594	0.011886461	2.9072503E-4	down	-1.2643322	XLOC_006336	BROAD Institute lincRNA (XLOC_006336), lincRNA [TCONS_00014248]	GACCGGACTTGGTTTACGAATACAGTGTACGAGGTTAAGATATGATAAAGTGTAAAAATA
A_33_P3395274	0.0111624915	2.6179792E-4	down	-1.5582969	ZADH2	Homo sapiens zinc binding alcohol dehydrogenase domain containing 2 (ZADH2), mRNA [NM_175907]	AGCAGTGTCATTTAGGGGTTCCTTTGATGATGACTACTGCTGTTAACTGACCTCAGCATT
A_21_P0000506	0.006760008	1.0765513E-4	up	1.3201822	SUZ12P1	Homo sapiens suppressor of zeste 12 homolog pseudogene 1 (SUZ12P1), non-coding RNA [NR_024187]	CAAGCGAGGCTCCCACAATGTTCTGGAAATGTTTTCATTCTGAAGCAGAATATAATTATT
A_24_P201381	0.006416827	9.649459E-5	up	2.3795803	FGFBP3	Homo sapiens fibroblast growth factor binding protein 3 (FGFBP3), mRNA [NM_152429]	GAAGTGCTACTTTTTAACGAAATGGTGACTAATGTTCTGGAACTTTCCCATTAACCTTCT
A_23_P66481	0.0034876862	2.3980563E-5	up	10.70277	RTN4RL1	Homo sapiens reticulon 4 receptor-like 1 (RTN4RL1), mRNA [NM_178568]	AGCATCCACAGTGTTAGTCCAAAGGGTCGGACCGTGTCGTCAGCCTAGCGTTTGGTCAGT
A_23_P164284	0.0067822537	1.08539585E-4	up	1.5701704	CLDN7	Homo sapiens claudin 7 (CLDN7), transcript variant 1, mRNA [NM_001307]	AACCCTTTGATCCCTACCAACATTAAGTATGAGTTTGGCCCTGCCATCTTTATTGGCTGG
A_24_P196851	0.0145278415	4.1144894E-4	down	-1.2468739	TLN1	Homo sapiens talin 1 (TLN1), mRNA [NM_006289]	ACAAGTTTCTGCCTTCAGAGCTTCGAGATGAGCACTAAAGAAGCCTCTTCTATTTAATGC
A_33_P3351554	0.0026387959	1.3114314E-5	up	1.9184173	ETNK2	Homo sapiens ethanolamine kinase 2 (ETNK2), mRNA [NM_018208]	GGCTCTGGCCCAGAAAGTGATTCATTTGTAAATTATCATGGTTTTCTTTCTGCATTAAAA
A_23_P80382	0.009073884	1.7704617E-4	up	1.6397352	PRR5	Homo sapiens proline rich 5 (renal) (PRR5), transcript variant 2, mRNA [NM_015366]	TGTATTTCTGTCTTGGTTGGAAATACCATCAGCCTTCCTTGCTCGGCCCAGGTCTGTTTC
A_33_P3287959	0.016594172	5.247172E-4	up	1.5805435	RASA4	Homo sapiens RAS p21 protein activator 4 (RASA4), transcript variant 1, mRNA [NM_006989]	TAGGATAAATGATATAGGCATTTGGGATTTGCTGCAAAATGACCCAGAGGCAGGGGTCAG
A_23_P12241	0.015198785	4.4003656E-4	up	2.0778728	MCOLN3	Homo sapiens mucolipin 3 (MCOLN3), transcript variant 1, mRNA [NM_018298]	TGTGGCTTGGAGTCATCCGATACCTCGGTTTCTTTGCAAAGTACAACCTCCTCATTTTGA
A_23_P90273	0.0015354342	3.903723E-6	down	-1.4631625	CHST8	Homo sapiens carbohydrate (N-acetylgalactosamine 4-0) sulfotransferase 8 (CHST8), transcript variant 3, mRNA [NM_022467]	GATGTCCCGCACTCCCTTAGCCATTGCCTTGGACCAAACCACGTGGTTGGCAGCTTTTCT
A_24_P330518	0.002822251	1.5546724E-5	up	2.4300742	CA12	Homo sapiens carbonic anhydrase XII (CA12), transcript variant 1, mRNA [NM_001218]	CTGTCAAAAGACTCTGTATATCTTTTGTGGATGAGTTTTGTGAGAGAACAGAGAGACCAT
A_23_P44932	0.018036911	6.0826086E-4	up	1.151616	EIF2A	Homo sapiens eukaryotic translation initiation factor 2A, 65kDa (EIF2A), mRNA [NM_032025]	GAAGCATGAAGCTAAGAAAGCTGCAAAGCAGGAAGCAAGAAGTGACAAGAGTCCAGATTT
A_23_P125668	0.0041145575	3.8761133E-5	up	1.1678793	SLC25A43	Homo sapiens solute carrier family 25, member 43 (SLC25A43), mRNA [NM_145305]	TGCTGACATCTGAGTGCACACACCACAGTGTAAATTATGCCTTATCAGAATCTAAATGAA
A_23_P24244	0.01628976	5.0525315E-4	down	-1.3632635	FAM208B	Homo sapiens family with sequence similarity 208, member B (FAM208B), mRNA [NM_017782]	GAAAGGCATACGATGCTACTATTATGCTCTGTTTTAAAGGTTTTACCTACCCTTGTAAAA
A_33_P3378665	0.011244207	2.6495347E-4	down	-1.3670832	TC2N	Homo sapiens tandem C2 domains, nuclear (TC2N), transcript variant 1, mRNA [NM_152332]	CTCTGATACTAATGTACTCAACAGCCAGGTATAAACTATATCTCCTAGTAACATTTTCCA
A_33_P3231833	0.009545321	1.937697E-4	down	-1.1855243			CTGCGTAGATCCCCAGCTGAGAAGAGTTTGTGGACCTTTACAGTATGTGATTTGTATTAA
A_23_P45475	0.0057010534	7.761132E-5	down	-1.2892326	GLA	Homo sapiens galactosidase, alpha (GLA), mRNA [NM_000169]	ATCACACAGCTCCTCCCTGTGAAAAGGAAGCTAGGGTTCTATGAATGGACTTCAAGGTTA
A_33_P3379947	0.00418634	4.0416893E-5	up	1.4308121	HLA-B	Homo sapiens major histocompatibility complex, class I, B (HLA-B), mRNA [NM_005514]	TTAATTAAATAAGTCAATTCCTGGAATTTGAGAGAGCAAATAAAGACCTGAGAACCTTCC
A_23_P169278	0.01725441	5.6246266E-4	down	-1.3334941	AGTPBP1	Homo sapiens ATP/GTP binding protein 1 (AGTPBP1), transcript variant 2, mRNA [NM_015239]	AAACCTGAGTATCATTGCATGAATTTTTATCTCCCTATGGTTATATCCTGCATCAAGTGG
A_33_P3271599	0.00392503	3.2876836E-5	up	1.0843178	CCDC125	Homo sapiens coiled-coil domain containing 125 (CCDC125), mRNA [NM_176816]	CCCCCATCTCCAAAAGAAAAGGCTATCAATACAAAAGTTTATCTAAATTACTGTACAGCT
A_23_P6836	0.009871443	2.0643027E-4	up	1.2599785	IP6K2	Homo sapiens inositol hexakisphosphate kinase 2 (IP6K2), transcript variant 1, mRNA [NM_016291]	AGAAGAATTTGAGTGGCTAAAGAAATCTGAAGTCTTGTACTACACTGTAGAGAAGAAGGG
A_24_P302574	0.0037125174	2.8173523E-5	down	-1.2772825	OSGEPL1	Homo sapiens O-sialoglycoprotein endopeptidase-like 1 (OSGEPL1), mRNA [NM_022353]	CCTGTAGACATGCTAAGGAAAATCTGCTTAGTATCGAGATCAAGAACTTTCATTCAAAAA
A_33_P3268622	0.0042597814	4.2447133E-5	up	3.2739425	LY6D	Homo sapiens lymphocyte antigen 6 complex, locus D (LY6D), mRNA [NM_003695]	CACTCCTTCTGTTTTGTTGCCGTTTATTTTTGTACTCAAATCTCTACATGGAGATAAATG
A_32_P181077	0.0018310791	5.401584E-6	down	-3.447359	DOCK8	Homo sapiens dedicator of cytokinesis 8 (DOCK8), transcript variant 1, mRNA [NM_203447]	AATATCTCTGTTTTCATTTCAGAACATTGTGCTGTCTGTCAGCATATGTATATCAGCTAC
A_33_P3352467	0.016320236	5.0756487E-4	up	1.3753372	SSTR2	Homo sapiens somatostatin receptor 2 (SSTR2), mRNA [NM_001050]	AAGGGGACTTTAGAGGACTTCATACAAAGCTGGGCATTAAGAAAACCACAATGCATGGCC
A_21_P0000766	0.010133533	2.191456E-4	up	1.4701006	TEKT4P2	Homo sapiens tektin 4 pseudogene 2 (TEKT4P2), transcript variant 2, non-coding RNA [NR_038328]	AGCTATGTTTCCAGTGTCCTCTGGGTGTTTCCAAGAGCAACAAGAAACGAATAAATCTCT
A_23_P350187	0.009339425	1.8535035E-4	down	-1.3874979	TET2	Homo sapiens tet methylcytosine dioxygenase 2 (TET2), transcript variant 1, mRNA [NM_001127208]	TTGCTAATATAGGAATATCAGGTTGACTATATAGCCATACTTGAAAATGCTTCTGAGTGG
A_24_P270033	0.0036749241	2.7045586E-5	up	1.5758107	MPZL3	Homo sapiens myelin protein zero-like 3 (MPZL3), transcript variant 1, mRNA [NM_198275]	GGGCCATATGCACAAATATTGTAACTCTTGGTATCTTTACTGCATCATAGTCAATAAACT
A_33_P3350074	0.005389344	7.023185E-5	up	1.3063147	SLC25A19	Homo sapiens solute carrier family 25 (mitochondrial thiamine pyrophosphate carrier), member 19 (SLC25A19), transcript variant 1, mRNA [NM_001126121]	AGGTCCCTACACTTGGCCTGTTTTTCCAACCTATTTAATAGACATTAAAGCTAAACACAC
A_33_P3380612	0.012048915	2.97975E-4	down	-1.254012	HSPG2	Homo sapiens heparan sulfate proteoglycan 2 (HSPG2), mRNA [NM_005529]	ATGGACATTGTGCCCTCAAGCTGTGGCGCTGCGATGGTGACTTTGACTGTGAGGACCGAA
A_24_P332081	0.007901012	1.398354E-4	up	1.4686439	JAKMIP3	Homo sapiens Janus kinase and microtubule interacting protein 3 (JAKMIP3), mRNA [NM_001105521]	CCTCTAACCACGTGACATTCCGTTCCATGCTAAGCAGTATTCACAGGCCTAAAATAGGTT
A_23_P216468	0.0015465121	4.082407E-6	down	-2.4929175	SLC1A1	Homo sapiens solute carrier family 1 (neuronal/epithelial high affinity glutamate transporter, system Xag), member 1 (SLC1A1), mRNA [NM_004170]	GAAATCCAAAATAGTCATGTTTCTGCAGTATTCTGTAGCCAACTTAAACCTGTGCTTTCA
A_23_P97990	0.0037152278	2.8929462E-5	down	-1.8159971	HTRA1	Homo sapiens HtrA serine peptidase 1 (HTRA1), mRNA [NM_002775]	CCGAAGTTGCCTCTTTTAGGAATCTCTTTGGAATTGGGAGCACGATGACTCTGAGTTTGA
A_23_P111402	0.0065189027	9.978814E-5	down	-2.007231	RSPO3	Homo sapiens R-spondin 3 (RSPO3), mRNA [NM_032784]	GTCATGTGTTTTCTTTCTCAATGAGGGAAAAACAATTTTATTACCTGCTTAATGGTCCAC
A_23_P105923	0.0152350385	4.436401E-4	down	-4.227479	DIO3	Homo sapiens deiodinase, iodothyronine, type III (DIO3), mRNA [NM_001362]	AAGTTGGGGTGTCTGCTTTGGGACCAGAGGAAGATAGCTTGAGAGGCATTGGCGAGGTTC
A_21_P0014224	0.011132313	2.6087073E-4	down	-1.362179		PREDICTED: Homo sapiens uncharacterized LOC101929759 (LOC101929759), misc_RNA [XR_242480]	CCTCTTCAAACTTTCAGACTTACGTTTGCTTCTTCTAAGTCCATCGACTTTATACATAAA
A_33_P3366241	0.0192626	6.746219E-4	down	-1.7903227	SCARA5	scavenger receptor class A, member 5 (putative) [Source:HGNC Symbol;Acc:28701] [ENST00000301906]	GGGGATGCCAGTAAGGACATTCTGCTGGGGCCGTGGGATATGGTGTTGGCACAGGGCTAG
A_23_P121011	0.0042528436	4.1741383E-5	up	1.39916	CSRNP1	Homo sapiens cysteine-serine-rich nuclear protein 1 (CSRNP1), mRNA [NM_033027]	GCGTGATGTTCCTTAGCCCAAAGACGGTGAGACAGGGCTGAAATCAGGTGGCTTCTGCCA
A_33_P3338733	0.014384032	4.0482465E-4	up	1.3132889	MITF	Homo sapiens microphthalmia-associated transcription factor (MITF), transcript variant 1, mRNA [NM_198159]	GGGGAAACTTGATTTGAGATTTTTATGCCTGTGACTTCCTTGGAAATCAAATGTAAAGTT
A_32_P215113	0.0035578406	2.5010058E-5	up	1.4109441	CCDC58	Homo sapiens coiled-coil domain containing 58 (CCDC58), mRNA [NM_001017928]	GAGCAGACAAAGTTGAAATGGATGCAGTCAGAACTGAATGTTGAAGAAGTGGTAAATGAC
A_32_P163125	0.0051966785	6.428812E-5	up	1.3668762	SGMS1	Homo sapiens sphingomyelin synthase 1 (SGMS1), mRNA [NM_147156]	GAATGAAGAAGTATATATATCCATTCTGTATTTTACGTGCAGCAGAATTATCTTCCGTAG
A_23_P201996	0.010133533	2.1914842E-4	down	-1.166585	WAC	Homo sapiens WW domain containing adaptor with coiled-coil (WAC), transcript variant 1, mRNA [NM_016628]	GTTGTGGGAGGGGAAAGAGGAAACAGAGCTAGTCAGATGTGAATTGTATCTGTTGTAATA
A_23_P64792	0.01632158	5.08478E-4	up	1.3285722	KCNMB4	Homo sapiens potassium large conductance calcium-activated channel, subfamily M, beta member 4 (KCNMB4), mRNA [NM_014505]	CTGCTGTAGCAATGGCTAAAGGGTCAAGATCTTAGCTGTATGGAGTAACTATTTCAGAAA
A_21_P0014119	0.01597179	4.8508105E-4	up	1.2329911		PREDICTED: Homo sapiens uncharacterized LOC101927597 (LOC101927597), transcript variant X4, misc_RNA [XR_241576]	TCCCGAACCACTCAAAAGGACAAAACAAGGAAATAGCAATGAAATTGGATTCAGTGAATG
A_23_P216023	0.005017074	5.9158956E-5	down	-2.87174	ANGPT1	Homo sapiens angiopoietin 1 (ANGPT1), transcript variant 1, mRNA [NM_001146]	GTTTCAAACTTGGTGACTTGATCCACTATGCCTTAATGGTTTCCTCCATTTGAGAAAATA
A_23_P147495	0.017046923	5.4965145E-4	up	1.5936365	BCORL1	Homo sapiens BCL6 corepressor-like 1 (BCORL1), mRNA [NM_021946]	TCTACCAATTGCTATTTTTCCGAACAATCCTTGTAGAGTATGTACCATCCAAAGGCAGGA
A_33_P3287840	0.005001551	5.8450427E-5	down	-1.3388029	STAM	Homo sapiens signal transducing adaptor molecule (SH3 domain and ITAM motif) 1 (STAM), transcript variant 1, mRNA [NM_003473]	GGCATAGGGTTATTTCCTTCTAATTTTGTGACTGCAGATCTCACTGCTGAACCAGAAATG
A_24_P160466	0.015746647	4.7296734E-4	up	1.3179631	GPRIN1	Homo sapiens G protein regulated inducer of neurite outgrowth 1 (GPRIN1), mRNA [NM_052899]	GGTGTTCTTGGGTATTGGGGACAGGACAGAGAGCTCATTCTATAACCACAGTTGTCTTTT
A_33_P3285195	0.0034378057	2.2833334E-5	up	4.9700327	LOC100507012	PREDICTED: Homo sapiens uncharacterized LOC100507012 (LOC100507012), transcript variant 1, misc_RNA [XR_109821]	CAGGCTCAGCCAACACTTGCCTTTATTAATGCTCATAATCAAGAAATAAAATCTCATACT
A_19_P00809682	0.005247154	6.597852E-5	down	-1.1302427	XLOC_014512	BROAD Institute lincRNA (XLOC_014512), lincRNA [TCONS_l2_00030085]	AGTGGTGGACTTGCCCGAATCTATGTGTCCAATGACGACAATGTTGGTATGAGTCTTTTC
A_23_P79587	0.0044180234	4.485639E-5	down	-1.3203146	ALPP	Homo sapiens alkaline phosphatase, placental (ALPP), mRNA [NM_001632]	AAGGTCCCTCCCCAGACATCTGGACACTGGGCATAGATTTCTCAAGAAGGAAGACTCCCC
A_33_P3316800	0.012442146	3.169502E-4	down	-1.4800196	AHR	Homo sapiens aryl hydrocarbon receptor (AHR), mRNA [NM_001621]	CTGTTGGACGTCAGCAAGTTCACATGGAGGCATTGATGCATGCTATTCACAATTATTCCA
A_23_P156327	0.0013081216	2.031374E-6	down	-2.9276962	TGFBI	Homo sapiens transforming growth factor, beta-induced, 68kDa (TGFBI), mRNA [NM_000358]	AGCTATGAGTTGAAATGTTCTGTCAAATGTGTCTCACATCTACACGTGGCTTGGAGGCTT
A_23_P61633	0.0051966785	6.4011954E-5	up	1.4111058	TNK2	Homo sapiens tyrosine kinase, non-receptor, 2 (TNK2), transcript variant 1, mRNA [NM_005781]	GGCCTTACCATGGACTTGAATGGGACTTGGCTGGCCTCAGGATCTTGTGCCTGGAAATAG
A_21_P0013568	0.01867587	6.470492E-4	down	-2.2935514	XLOC_014512	BROAD Institute lincRNA (XLOC_014512), lincRNA [TCONS_l2_00028751]	CCTCAATCATGTTCAGGAAATGATCAGGTCAAGATGTGGAGTGAGCCAGCTTTTCTCTTT
A_24_P945147	0.0152350385	4.438425E-4	up	1.1540653	RABEP1	Homo sapiens rabaptin, RAB GTPase binding effector protein 1 (RABEP1), transcript variant 1, mRNA [NM_004703]	CCTTTCAGAACTCACATTGGCAAGTGTAAAAAGATGACTTAAGGTGAAGTGAGGACAAAA
A_33_P3259042	0.009426544	1.8987225E-4	down	-2.2374299	MYOCD	Homo sapiens myocardin (MYOCD), transcript variant 1, mRNA [NM_001146312]	AGACAGCAGTCATGGTGCCGGGGGAAACCCTTGTCCCAAAAGCCCATGTGTACAGCAAAA
A_21_P0003445	0.009889119	2.0951938E-4	down	-4.1352677		Homo sapiens mRNA; cDNA DKFZp686E16130 (from clone DKFZp686E16130). [BX648772]	GAGACTGATGCTACATTTCTCTTTATCTATCCCTGTATTGTTTAATTTGTTCCAAGTGCT
A_23_P315571	0.017018246	5.464822E-4	down	-1.3144119	RFTN1	Homo sapiens raftlin, lipid raft linker 1 (RFTN1), mRNA [NM_015150]	TTTATCATGTGTATATCGTCCAGAAAGTATTAAGGCTTTAGGTAGATGCAACTGGCGAAC
A_21_P0008765	0.014729483	4.206433E-4	up	1.7980454	LOC101929560	PREDICTED: Homo sapiens uncharacterized LOC101929560 (LOC101929560), transcript variant X1, misc_RNA [XR_243193]	GTAGTGCTGTCTCTGCTTTTTGCATCTTGCCCAGTATATTATGACACAAATAAAAATTCT
A_24_P940135	0.016767353	5.336974E-4	down	-1.4284898	CTBS	Homo sapiens chitobiase, di-N-acetyl- (CTBS), mRNA [NM_004388]	GCCCCTGTAAATTGGAATACATGATGATTGAACCATCTGTTATGAGAATATTACATTTCC
A_24_P82419	0.0071874387	1.1828202E-4	up	1.2837571	H3F3B	Homo sapiens H3 histone, family 3B (H3.3B) (H3F3B), mRNA [NM_005324]	TTCCAGAGGTTGGTGAGGGAGATCGCGCAGGATTTCAAAACCGACCTGAGGTTTCAGAGC
A_33_P3218832	0.008931508	1.7180378E-4	down	-2.5078945	RIMS1	Homo sapiens regulating synaptic membrane exocytosis 1 (RIMS1), transcript variant 1, mRNA [NM_014989]	CCACTTGTCTTAACACTCCCCTGTGCTTTTAAATGAAATTCCAATTCATGTATGTAAACA
A_33_P3390539	0.010133533	2.212661E-4	up	1.6485178	GYLTL1B	Homo sapiens glycosyltransferase-like 1B (GYLTL1B), mRNA [NM_152312]	TGAAGAACAAGCATGTGGAATTCTTCCGCAATTTCTACCTGACCTTCCTGGAGTACGATG
A_24_P10226	0.0114330035	2.7355025E-4	up	1.2367336	SEMA6D	Homo sapiens sema domain, transmembrane domain (TM), and cytoplasmic domain, (semaphorin) 6D (SEMA6D), transcript variant 6, mRNA [NM_024966]	TTCTACTTTGATGTTCTGCAGTCTATTACAGACATAATACAAATCAATGGCATCCCCACT
A_21_P0012327	0.0148252295	4.253752E-4	up	1.3570086			GTTTTTGCCTCCTGCTGGTCATGTGCTTTCACACATCAAGAGAGGACATTTAACATTTGA
A_33_P3321205	0.0050779954	6.120275E-5	up	1.5479769	BEGAIN	Homo sapiens brain-enriched guanylate kinase-associated (BEGAIN), transcript variant 1, mRNA [NM_001159531]	TGATGCATGCCCTGCCAGTTAGTACTGTATTTTGCATTCATTAATAAAAGACACCGGTGG
A_33_P3241661	0.009568285	1.9469729E-4	up	2.5006661	LOC388780	PREDICTED: Homo sapiens uncharacterized LOC388780 (LOC388780), mRNA [XM_005260905]	CTGCTACTGTGTGTTTGCTGGTTCCAATGATACATAATTTGTGCTTTTCGTAATTAAAGT
A_23_P26629	0.016077131	4.931266E-4	down	-1.7380816	PYCARD	Homo sapiens PYD and CARD domain containing (PYCARD), transcript variant 1, mRNA [NM_013258]	CCCAAGCAAGATGCGGAAGCTCTTCAGTTTCACACCAGCCTGGAACTGGACCTGCAAGGA
A_24_P322474	0.0017666726	4.874636E-6	up	1.7457004	PDE4A	Homo sapiens phosphodiesterase 4A, cAMP-specific (PDE4A), transcript variant 4, mRNA [NM_006202]	TCCACTTTGACGATCAGTCATTCGGTCCGTTGATCAATAATCCTTCGATCTTGTCTCCAA
A_33_P3259423	0.013866944	3.8043293E-4	up	1.1907682	WDR55	Homo sapiens WD repeat domain 55 (WDR55), mRNA [NM_017706]	CTTTGGCTCAGCTGCCCTTCCCCACAAATAAAAACCAACAAAGAGGACAAATCAGGACAA
A_23_P122174	0.0052488646	6.6299326E-5	up	1.2461852	XRCC4	Homo sapiens X-ray repair complementing defective repair in Chinese hamster cells 4 (XRCC4), transcript variant 3, mRNA [NM_022550]	AAACCAAACTGATCTCTCTGGGTTGGCTTCAGCTGCTGTAAGTAAAGATGATTCCATTAT
A_23_P331700	0.0043285843	4.3423195E-5	up	2.8866162	SRRM3	Homo sapiens serine/arginine repetitive matrix 3 (SRRM3), mRNA [NM_001110199]	GGTCACAGGCATAGGATAACATGTGCTTTGGACCTGACAAGGGAGTACCTTGGGGGTCTG
A_23_P100883	0.0037022473	2.7611097E-5	up	1.2306962	SUZ12	Homo sapiens SUZ12 polycomb repressive complex 2 subunit (SUZ12), mRNA [NM_015355]	CTTGATTGGTAAGCTCTCCAAATGATGAGTTCTAGTAAACTCTGATTTTTGCCTCTGGAT
A_23_P422831	0.009472134	1.9135058E-4	up	2.012514	FAM189A2	Homo sapiens family with sequence similarity 189, member A2 (FAM189A2), transcript variant 1, mRNA [NM_004816]	GAGGATTATTGTTGATTCCATTTACTCATGCTTGCAAAACTAGAGACCCCTAAGGCAGAA
A_33_P3362088	0.0038809115	3.1665924E-5	up	1.6432972	P2RX4	Homo sapiens purinergic receptor P2X, ligand-gated ion channel, 4 (P2RX4), transcript variant 1, mRNA [NM_001256796]	TCCTCAGAGAAGCGCTGTGCTAAGGTGATCGAGGACCAGACATTAAAGCGTGATTTTCTT
A_23_P48596	0.01417972	3.9567717E-4	up	4.330203	RNASE1	Homo sapiens ribonuclease, RNase A family, 1 (pancreatic) (RNASE1), transcript variant 3, mRNA [NM_198232]	GTTAGGGCTCCTATTCAACACACACATGCTTCCCTTTCCTGAGTCCCATCCCTGCGTGAT
A_23_P37983	0.012863381	3.3718237E-4	up	1.2142618	MT1B	Homo sapiens metallothionein 1B (MT1B), mRNA [NM_005947]	TCATCAGAGAAGTGCCGCTGCTGTGCCTGATGTTGGGAGAGCCCTGCTCCCAGACATAAA
A_23_P104617	0.0049561104	5.6946577E-5	up	1.581458	GYLTL1B	Homo sapiens glycosyltransferase-like 1B (GYLTL1B), mRNA [NM_152312]	ATTGGGCAGACACCAGGGCAACCTGCCCTCCGCCATCCCTGCTATTTAAATTATTTAAGG
A_32_P151544	0.010186542	2.2426067E-4	up	1.4000022	KRT18	Homo sapiens keratin 18 (KRT18), transcript variant 1, mRNA [NM_000224]	GAGGACTTCATTCTTGGTGATGCCTTGGACAGCAGCAACTCCATGCAAACCATCCAAAAG
A_23_P35066	0.011939778	2.9249972E-4	down	-1.3011278	SNX7	Homo sapiens sorting nexin 7 (SNX7), transcript variant 1, mRNA [NM_015976]	GAGACAGCATTTATTAACCAAAGTTATTCTTTCTGGATCTGCCGTGTCCTTATAAAGTGG
A_24_P297551	0.017830644	5.9301517E-4	down	-2.5661974	FAM19A2	Homo sapiens family with sequence similarity 19 (chemokine (C-C motif)-like), member A2 (FAM19A2), mRNA [NM_178539]	TCTATTAGTTTGTGACAATATTCAAAGGCCAAAACACTACTCAGACACTTTCCTGGGAAG
A_33_P3241786	0.017830644	5.931951E-4	up	3.7500634	ADD2	Homo sapiens adducin 2 (beta) (ADD2), transcript variant 2, mRNA [NM_017482]	CATAGTGATGGCTTGGAAGTGTCCATAGAAGGGATTGCAATAAAGGTGTGTCTTCCTTCT
A_23_P259506	0.004865628	5.3989017E-5	up	1.4919719	CYSTM1	Homo sapiens cysteine-rich transmembrane module containing 1 (CYSTM1), mRNA [NM_032412]	TGGGATTCTAGATTAATGGGGGTTGCTACTGTTTAATTCAGTGACTTGATCTTTTTAATG
A_23_P70670	0.0065965257	1.027071E-4	down	-1.4278041	CD83	Homo sapiens CD83 molecule (CD83), transcript variant 1, mRNA [NM_004233]	GCAGAAGGGACTTCACGAAGTGTTGCATGGATGTTTTAGCCATTGTTGGCTTTCCCTTAT
A_33_P3384932	0.01588355	4.7895766E-4	up	1.3490064	NUDT8	Homo sapiens nudix (nucleoside diphosphate linked moiety X)-type motif 8 (NUDT8), transcript variant 1, mRNA [NM_001243750]	TGGCTTCACCCTGTCAGGCCAGCTCCACTCCAGGACTGAATAAAGGTCTTTGACAGCTCT
A_23_P29836	0.016148983	4.9650983E-4	up	1.0786062	TMEM42	Homo sapiens transmembrane protein 42 (TMEM42), mRNA [NM_144638]	TGGGGCTTTCTGACAGTTCCATGCTGATGTATCAGGCCATCTGTGTCATGCTTATGTATT
A_23_P148969	0.006889057	1.1065613E-4	down	-1.1912704	LRRC40	Homo sapiens leucine rich repeat containing 40 (LRRC40), mRNA [NM_017768]	GCATGTATATCAATTTATATAGATAGGTAGATAGCTTTTGGATGATTGAGGCATGCTTAT
A_33_P3360540	0.004561502	4.737419E-5	up	1.9842429	AGPAT2	Homo sapiens 1-acylglycerol-3-phosphate O-acyltransferase 2 (AGPAT2), transcript variant 1, mRNA [NM_006412]	CTGCTCCTGCTGGCCTGGAAGACTCTGTGGGGTCAGCACTGTACTCCGTTGCTGTTTTTT
A_33_P3314176	0.0014145512	2.7630965E-6	down	-3.9754803	FAM46C	Homo sapiens family with sequence similarity 46, member C (FAM46C), mRNA [NM_017709]	GGTCACTAACCTTACTTGATGCAGATAAAATCACTTGTCAATGCAAAATGTGTTAGAACT
A_24_P360763	0.009921589	2.1079392E-4	down	-1.459938	CREM	Homo sapiens cAMP responsive element modulator (CREM), transcript variant 2, mRNA [NM_001881]	TAAACGTAGAGAAATCCTTTCACGAAGACCCTCTTATAGGAAAATACTGAATGAACTGTC
A_23_P356004	0.0020907004	7.3845345E-6	down	-2.7895663	KCNIP3	Homo sapiens Kv channel interacting protein 3, calsenilin (KCNIP3), transcript variant 1, mRNA [NM_013434]	TTCTCAGCATCCACTAATATTCAGTCCTGTATATTTTAATAAAATAAACTTGACAAAGGA
A_23_P116414	0.00208786	7.291528E-6	up	2.015197	PLA2G16	Homo sapiens phospholipase A2, group XVI (PLA2G16), transcript variant 1, mRNA [NM_007069]	CATCAAGGGGGTCTTGTTTTGCTAGAGAGTTTGGGGTTTGGTTTGTGGATTTCATTGTGA
A_33_P3271341	0.0024237537	1.0783023E-5	up	1.8941584	LOC388282	Homo sapiens uncharacterized LOC388282 (LOC388282), mRNA [NM_001278081]	CTCCCTGTGACCAAATCTGTGGCCATCACAACCGACCTTGAACCATAATACTAAGAATGA
A_23_P255057	0.016029868	4.9000425E-4	up	1.3490165	SLC35A5	Homo sapiens solute carrier family 35, member A5 (SLC35A5), mRNA [NM_017945]	TGTGCAGATTATTTTCCTTGGCCTTCAAGCTTCCAAAAAACTTGTAATAATCATGTTAGC
A_23_P63343	7.664258E-4	3.021052E-7	down	-20.671125	UTS2	Homo sapiens urotensin 2 (UTS2), transcript variant 1, mRNA [NM_021995]	AGAATCTGGAAACCATACAAGAAACGTGAGACTCCTGATTGCTTCTGGAAATACTGTGTC
A_33_P3235390	0.017245319	5.6122965E-4	up	1.345097	UBA5	Homo sapiens ubiquitin-like modifier activating enzyme 5 (UBA5), transcript variant 1, mRNA [NM_024818]	GGTGTAACCACTGCCAATAGGCTGTTTCTATGCTTATTTCCTATTTTGATTTTTACTTTG
A_33_P3381265	0.017710658	5.8710907E-4	up	2.9741273	CYB5R2	Homo sapiens cytochrome b5 reductase 2 (CYB5R2), mRNA [NM_016229]	TATCTTGGTCAGAAAAGAGCTTGAAGAAATTGCCAGGACTCACCCAGACCAGTTCAACCT
A_21_P0000176	0.010970493	2.5513276E-4	up	2.255042	CDH13	Homo sapiens cadherin 13 (CDH13), transcript variant 5, mRNA [NM_001220491]	ACAGCGAACTTCTCTTGAATGAAGGCATTACAGCAGATTTAAATCCATGCATTACAATTT
A_23_P63929	0.013834239	3.7899037E-4	up	1.3533845	WDR11	Homo sapiens WD repeat domain 11 (WDR11), mRNA [NM_018117]	TCTCAAATATATGCTGTGCCTGTACTTATATACAGTCTTTCAAGAGAGATACAAACAAGG
A_33_P3283833	0.012532798	3.2067392E-4	up	2.891914	FOXS1	Homo sapiens forkhead box S1 (FOXS1), mRNA [NM_004118]	AGGGCCTCTTGGGATTTACTCTGTGGCTCTCAGGGCCAATAAAGCCATGTGATGATGAGG
A_33_P3379454	0.008925062	1.7140391E-4	up	1.1388363	UHRF1	Homo sapiens ubiquitin-like with PHD and ring finger domains 1 (UHRF1), transcript variant 2, mRNA [NM_013282]	GGCTTAACTTAAACAGGTAGTGTTTCCTCCGTTCCCTAAAAAGGTTTGTCTTCCTTTTTT
A_33_P3356711	0.013421386	3.6053822E-4	down	-1.2983847	ING3	Homo sapiens inhibitor of growth family, member 3 (ING3), transcript variant 3, mRNA [NM_198267]	GTATGTATCAGTCCTTATTTAGAGACTGCCTGCTTTTTAATTCATATAGCTCTTTGGTTC
A_23_P156880	0.01586314	4.7802954E-4	up	1.404918	ENPP1	Homo sapiens ectonucleotide pyrophosphatase/phosphodiesterase 1 (ENPP1), mRNA [NM_006208]	CATTGATCAAGTTCGGGGGAATAAAGACAGACCACACCTAAAACTGCCTTTCTGCTTCTC
A_23_P124122	0.0053744363	6.927376E-5	down	-1.2874652	PXMP2	Homo sapiens peroxisomal membrane protein 2, 22kDa (PXMP2), mRNA [NM_018663]	AGAAACAGAAATCTCTGAATGTCAGAAACCCTGTCTTTTAAAAAGGCAGTCACTGCCTTC
A_21_P0011344	0.00887374	1.689299E-4	up	1.7626516	RHPN2	Homo sapiens rhophilin, Rho GTPase binding protein 2 (RHPN2), mRNA [NM_033103]	AGAAAATCTCCAAGAAGCTTTCCTTCCTGAGTTGGGGCACCAACAAGAACAGACAGAAGT
A_23_P103282	0.007336911	1.2304571E-4	down	-1.3025193	TMEM59	Homo sapiens transmembrane protein 59 (TMEM59), mRNA [NM_004872]	TGAAGATCATGAAGAAGCAGGGCCTCTACCTACAAAAGTGAATCTTGCTCATTCTGAAAT
A_33_P3374210	0.0013183687	2.1046505E-6	down	-6.92814	MKI67	Homo sapiens marker of proliferation Ki-67 (MKI67), transcript variant 1, mRNA [NM_002417]	ATAAATGCTCTGCAAGCCCTCCCTTAAGACGGCAGTGTATTAGAGAAAATGGAAACGTAG
A_33_P3210278	0.014446982	4.0827552E-4	down	-1.7110606	SYNE2	Homo sapiens spectrin repeat containing, nuclear envelope 2 (SYNE2), transcript variant 5, mRNA [NM_182914]	GGTTGGTACAGAAACTTGAAGCTGTTTGTGATATGTACAACTCAGATGTTTCTCATTAAA
A_33_P3272160	0.0077662	1.356939E-4	up	1.1125184	REXO4	Homo sapiens REX4, RNA exonuclease 4 homolog (S. cerevisiae) (REXO4), transcript variant 1, mRNA [NM_020385]	ACAGAAAAGGGGCAGACACACCGAGGATGCGATTTAAAATAAATGCAGATGTTTACTTGG
A_23_P5903	0.0043285843	4.337E-5	down	-1.8569702	SLCO4A1	Homo sapiens solute carrier organic anion transporter family, member 4A1 (SLCO4A1), mRNA [NM_016354]	TATTTATGGACACACAGTTTGCATCAGAACGTGTTTATAGAATGTGTTTTATACCCGATC
A_33_P3393821	0.010115985	2.1811402E-4	down	-1.5640547	C1R	Homo sapiens complement component 1, r subcomponent (C1R), mRNA [NM_001733]	TACACCAAAGTGCTCAACTACGTGGACTGGATCAAGAAAGAGATGGAGGAGGAGGACTGA
A_32_P210642	0.0028975038	1.6846285E-5	up	1.9072443	EGFL7	Homo sapiens EGF-like-domain, multiple 7 (EGFL7), transcript variant 2, mRNA [NM_201446]	AAGGCCAGGTGGGCCCTCAGCTGAGGGAAGGTACGAGCTCCCTGCTGGAGCCTGGGACCC
A_21_P0007375	0.012408272	3.152262E-4	down	-1.197197	XLOC_009508	BROAD Institute lincRNA (XLOC_009508), lincRNA [TCONS_00019713]	AAGTGGTTGCAGATGTTTCCTCCCTACTGCTCTGACTTTGCCAGCGGGCACTGCGATGTG
A_23_P12147	0.01267774	3.2807718E-4	up	1.3234833	C1orf74	Homo sapiens chromosome 1 open reading frame 74 (C1orf74), mRNA [NM_152485]	CTCAGAACCCGATTTAGGACTCAGAATGACTTTGCTGATCTCAGCATCTCCTCTGAGATA
A_24_P411186	0.0018430351	5.521223E-6	up	3.7735314	BCL11A	Homo sapiens B-cell CLL/lymphoma 11A (zinc finger protein) (BCL11A), transcript variant 1, mRNA [NM_022893]	GATGACCAAAGGTCATTACAACCTGGCTTTTTATTGTATTTGTTTCTGGTCTTTGTTAAG
A_23_P254741	0.007386974	1.2622454E-4	up	11.186772	SOD3	Homo sapiens superoxide dismutase 3, extracellular (SOD3), mRNA [NM_003102]	AGAGCTGCTCCTTTGGGGGAATGTTTGGCAACCTTTGTGTTACAGATTAAAAATTCAGCA
A_23_P214168	0.015295812	4.4726525E-4	down	-1.3092647	COL12A1	Homo sapiens collagen, type XII, alpha 1 (COL12A1), transcript variant long, mRNA [NM_004370]	AGTGCATCAACGGGATACAGTTCCATATTGCCTTAAACCTCCTTGTTTTAGACACACTAA
A_33_P3230219	0.010263095	2.2836545E-4	up	1.3811913	TMEM54	Homo sapiens transmembrane protein 54 (TMEM54), mRNA [NM_033504]	CCAGCCCACTGCACTGAAATGAGACTTTATTCTGAAATTATTAAAAAGAACAGAGATGCT
A_24_P910733	0.016025988	4.889381E-4	up	1.376982	CCDC50	Homo sapiens coiled-coil domain containing 50 (CCDC50), transcript variant 2, mRNA [NM_178335]	TCACCATTCTAAGAATGAAAGGCCAGCACGGCCACCACCACCTATCATGACAGATGGTGA
A_24_P236799	0.015554677	4.6290943E-4	up	1.3034794	RAB31	Homo sapiens RAB31, member RAS oncogene family (RAB31), mRNA [NM_006868]	ATTAAAGAGCTCTGAACTGTATTCAGACCGACTGGGTATCTAGCTTACTGTTTTAACATC
A_33_P3242952	0.004098543	3.731632E-5	up	1.383134	FAM72A	Homo sapiens family with sequence similarity 72, member A (FAM72A), mRNA [NM_001123168]	GGACACTTCTGGATGTTTCACAGCCAGGCAGTTTATGATATTAACAGACTAGACTCCACA
A_21_P0011744	0.0035578406	2.487591E-5	down	-1.4020153	LINC00665	Homo sapiens long intergenic non-protein coding RNA 665 (LINC00665), transcript variant 2, long non-coding RNA [NR_038279]	TTGAACAGAGCTGCGCCTGGATCCCGCCACAGTGAGGAGACCTGAAGACCAGAGAAAACA
A_33_P3419334	0.017091513	5.517629E-4	down	-1.1548249	GNAI3	Homo sapiens guanine nucleotide binding protein (G protein), alpha inhibiting activity polypeptide 3 (GNAI3), mRNA [NM_006496]	CCTGGTGGAATATTATTTTCAACTGTAGTCTTTCTATACTGTGGACTAATGAAATGGTGT
A_23_P322845	0.016438529	5.145053E-4	down	-1.2456414	PPAPDC1B	Homo sapiens phosphatidic acid phosphatase type 2 domain containing 1B (PPAPDC1B), transcript variant 1, mRNA [NM_001102559]	AGATGACTGTTTCTACCTCATTTGACCATAACTGTACTTGTGAGCTTCTTTCCTTCCATT
A_24_P10214	0.013377123	3.577673E-4	up	3.1167512	STXBP6	Homo sapiens syntaxin binding protein 6 (amisyn) (STXBP6), mRNA [NM_014178]	AGCTTCGCCAGGTTAATGGTATCGATCCTAATGGGGATTCGGCAGAGTTTGATTTGTTGT
A_23_P204998	0.004000943	3.539655E-5	down	-1.6902268	FARP1	Homo sapiens FERM, RhoGEF (ARHGEF) and pleckstrin domain protein 1 (chondrocyte-derived) (FARP1), transcript variant 1, mRNA [NM_005766]	TCCTCCTGCAACTGTGGTTTGAAACTGCGCATTCTCTAGTAGTATATATCGTGCCTGTCT
A_33_P3350202	0.016517576	5.198874E-4	down	-1.1139222	MOCS3	Homo sapiens molybdenum cofactor synthesis 3 (MOCS3), mRNA [NM_014484]	GACTTGCTTTGGAATTTTCAAGTCAAAGTCCCAACCCTTTGCCTCTCCCCCTTTAATTTG
A_24_P208345	0.0053937337	7.0684335E-5	up	1.8321291	SLC45A3	Homo sapiens solute carrier family 45, member 3 (SLC45A3), mRNA [NM_033102]	GTGCCGTTTGCAATAATGTCGTCTTATTTATTTAGCGGGGTGAATATTTTATACTGTAAG
A_32_P524904	0.009536776	1.9340827E-4	down	-1.680265	C11orf86	Homo sapiens chromosome 11 open reading frame 86 (C11orf86), mRNA [NM_001136485]	GGCTGAGCACTCTGTGCTGAAAACCTTTGAACCTCACGGTGTCCTGATGAAGGAAGCAGA
A_23_P107963	0.0042597814	4.246954E-5	up	2.1442862	FUT1	Homo sapiens fucosyltransferase 1 (galactoside 2-alpha-L-fucosyltransferase, H blood group) (FUT1), mRNA [NM_000148]	AACTCAGCTGCCACGGGTGAGAGAGCAGGAGGTATGAATTAAAAGTCTACAGCACTAAAA
A_33_P3366667	0.0026200688	1.2821562E-5	down	-1.4065038	EYA1	Homo sapiens eyes absent homolog 1 (Drosophila) (EYA1), transcript variant 3, mRNA [NM_000503]	GCTCTCCTACCACCTCACTTTTTCATTTCCACACTAATGTATTATATGTAACTACTTGGA
A_23_P156180	0.006565009	1.0180121E-4	down	-1.6466293	SLC22A4	Homo sapiens solute carrier family 22 (organic cation/zwitterion transporter), member 4 (SLC22A4), mRNA [NM_003059]	AAACAAGAGACTCAATGGAGACAGAAGAAAATCCCAAGGTTCTAATAACTGCATTCTGAA
A_33_P3286349	0.004955935	5.6733414E-5	up	2.8258111	DNAAF3	Homo sapiens dynein, axonemal, assembly factor 3 (DNAAF3), transcript variant 4, mRNA [NM_001256716]	ATTGTTCTCTCAGAATTCCAAATTCCACTTCTGAGGCTCTAAGCCCAGCCTAGGATCTGA
A_23_P62920	0.010107455	2.1753169E-4	down	-1.5131202	KIFAP3	Homo sapiens kinesin-associated protein 3 (KIFAP3), transcript variant 1, mRNA [NM_014970]	TGTGTGGGTTGGGTTAATTTTGGATCTTTGCCTAATAATGCATGTTGATGTTATTGTGGG
A_32_P147622	0.001796813	5.1348643E-6	up	2.466142	MCF2L-AS1	Homo sapiens MCF2L antisense RNA 1 (MCF2L-AS1), long non-coding RNA [NR_034002]	CGGCAACAATGCACCAGCATTCCAGCGTCCAACAGAGCATCCGTGTACCATTCCGGCATT
A_23_P96383	0.009970934	2.1223533E-4	up	1.619585	SRPX	Homo sapiens sushi-repeat containing protein, X-linked (SRPX), transcript variant 1, mRNA [NM_006307]	TGACCATATTTACTCTTTCTAACTTTCTTTACTCCATCATGGCTGGTTGATTTTGTAGAG
A_24_P226970	0.014711093	4.1953826E-4	up	2.053763	ZNF365	Homo sapiens zinc finger protein 365 (ZNF365), transcript variant A, mRNA [NM_014951]	GCTTTTTTGAAGAAATCACCAAAGTTTCTGGGAAACTATGTTCAAGGTTGAAATGGAGAG
A_23_P2181	8.9715177E-4	8.493617E-7	up	4.1426587	CYB5R2	Homo sapiens cytochrome b5 reductase 2 (CYB5R2), mRNA [NM_016229]	CTTGCTTGGAGGCTGGCAAGAGCTCCATTTCAGTATCTTTCTCCGTGGTTTTGTGAAATA
A_23_P304897	0.012182763	3.068561E-4	down	-12.209244	BDKRB2	Homo sapiens bradykinin receptor B2 (BDKRB2), mRNA [NM_000623]	GCCCTATGCATGGTGTAGATGCCCTGATAAAGAACATCTGTCCTGTGAAAGACTCAATGA
A_33_P3296862	0.007386974	1.2576976E-4	down	-1.8727633	C16orf89	Homo sapiens chromosome 16 open reading frame 89 (C16orf89), transcript variant 1, mRNA [NM_152459]	AAGGCATCTGGAGGATAAGCAAAGCCACCCCGACACCCAATCTTGGAAGCCCTGAGTAGG
A_33_P3296707	0.0021284928	8.0991E-6	down	-1.2782902	FAM127C	Homo sapiens family with sequence similarity 127, member C (FAM127C), mRNA [NM_001078173]	CTGGCCTCAAGTTACCAGGTAGCCTGAACTTTGATTTTATTTTACCATTAAATTGCTTTA
A_23_P40782	0.012442146	3.1706764E-4	up	1.2974807	COMMD2	Homo sapiens COMM domain containing 2 (COMMD2), mRNA [NM_016094]	GAGCTCAAAGCTCATGATTTCTGAACTGGATTTCCAAGACTCTGTTTTTGTTCTGGGATT
A_23_P126075	0.008265143	1.5177637E-4	up	1.2006541	KCNK1	Homo sapiens potassium channel, subfamily K, member 1 (KCNK1), mRNA [NM_002245]	AGTATGCTGCTGTGGTTAGAAGCAGATTTTATACTTTTAACTGGAAACTTTGGGGTTTGC
A_33_P3384287	0.012479262	3.1899728E-4	up	1.1717985	PALM	Homo sapiens paralemmin (PALM), transcript variant 1, mRNA [NM_002579]	ACGAGGCCCCCGATGTTCTTGATTTTCCCAGAGAAGCAAATAAACAGCGTGAACAGCCCC
A_24_P334300	0.013024366	3.4499593E-4	up	1.7973329	FGF12	Homo sapiens fibroblast growth factor 12 (FGF12), transcript variant 2, mRNA [NM_004113]	TTTCCTAGAACACAGAAGGGTACCAGTAATACACTAAATGTTCAAGGTGTGTAGAGAAAT
A_23_P52727	0.015983984	4.8639646E-4	up	1.3680917	NAV2	Homo sapiens neuron navigator 2 (NAV2), transcript variant 1, mRNA [NM_182964]	CATTTGTCATGAGGTTTTTGGATTTGCCAATGATCTGCTGGACATCATGCCCCATGTCAT
A_23_P112103	0.008956876	1.7282132E-4	up	2.9966264	GSDMD	Homo sapiens gasdermin D (GSDMD), transcript variant 1, mRNA [NM_024736]	AGAGGTGGAGACCATCTCCAAGGAACTGGAGCTTTTGGACAGAGAGCTGTGCCAGCTGCT
A_21_P0000491	0.006133031	8.908421E-5	up	2.486288	SNAR-G1	Homo sapiens small ILF3/NF90-associated RNA G1 (SNAR-G1), small nuclear RNA [NR_004383]	TCAAGGCTAGGCGAGGGTGTGAGGGACTGGAGTTCGAGGTCAACCTGGGCCCCATTGGTA
A_23_P139527	0.0042597814	4.2130887E-5	down	-2.1054058	HPD	Homo sapiens 4-hydroxyphenylpyruvate dioxygenase (HPD), transcript variant 1, mRNA [NM_002150]	AGCTGAAGACGGCCAAGATCAAGGTGAAGGAGAACATTGATGCCCTGGAGGAGCTGAAAA
A_33_P3374205	0.0011306227	1.5970601E-6	down	-7.5678086	MKI67	Homo sapiens marker of proliferation Ki-67 (MKI67), transcript variant 1, mRNA [NM_002417]	ATGTGCTCTGGGTTACCTGGTCTTAGTTCAGTTGATATCAACAACTTTGGTGATTCCATT
A_19_P00322432	0.019948052	7.1671297E-4	down	-1.194151	LOC100506014		CAGCTGCATAAAAACCCTCTCCTTATCTCTTTGTCAAGGGGATTTGAGAAATCTTGCTGT
A_23_P202860	0.009081758	1.7739202E-4	down	-1.3703814	CYP2R1	Homo sapiens cytochrome P450, family 2, subfamily R, polypeptide 1 (CYP2R1), mRNA [NM_024514]	CTCATCTGTGCTGAAAGACGCTGAAACTGCCTGGGATGTTTTCGGGAACAAGAATGTATA
A_23_P74609	0.004098543	3.7696824E-5	up	2.7407045	G0S2	Homo sapiens G0/G1switch 2 (G0S2), mRNA [NM_015714]	CCAACACTGTGTGAATTATCTAAATGCGTCTACCATTTTGCACTAGGGAGGAAGGATAAA
A_24_P90097	0.0035578406	2.5103114E-5	up	1.3002669	ADD3	Homo sapiens adducin 3 (gamma) (ADD3), transcript variant 1, mRNA [NM_016824]	GGTGAGTTGGCATGCAAAAAATTACATTGATTACAGTGTGTTTTGGAGCTGGCTCTGTTT
A_23_P63289	0.014232057	3.98584E-4	down	-1.1412491	SSU72	Homo sapiens SSU72 RNA polymerase II CTD phosphatase homolog (S. cerevisiae) (SSU72), mRNA [NM_014188]	CCTGACATTTGTTTTTACTTACAGGTGTTCTGCTGGTGACGGTAGCATTACCCAAATAAA
A_24_P253755	0.010523049	2.3968481E-4	up	1.2984633	PIGL	Homo sapiens phosphatidylinositol glycan anchor biosynthesis, class L (PIGL), mRNA [NM_004278]	TGTGATGTTTTGGGGATTCCACTCTCCAGTGTAATGATTATTGACAACAGGGATTTCCCA
A_23_P211631	0.00432865	4.3615346E-5	down	-1.2305954	FBLN1	Homo sapiens fibulin 1 (FBLN1), transcript variant D, mRNA [NM_006486]	GGAATGGCTGGGATTTCTCGGCACTCTGCATCATCCATCTTTTCTTATAGGTGGGAAAAT
A_23_P350689	0.0072725182	1.2097214E-4	up	2.081092	ZDHHC23	Homo sapiens zinc finger, DHHC-type containing 23 (ZDHHC23), mRNA [NM_173570]	CCTGCAGTCTCAACTCATTGTGATCCTAATGGTCTGGGTGATTGGATGGTTTGAGTTGTT
A_33_P3215948	0.0015465121	4.0935297E-6	up	3.9734566	MPZL2	Homo sapiens myelin protein zero-like 2 (MPZL2), transcript variant 1, mRNA [NM_005797]	GTAATATGGGCCTGTTGTTTAGTGTCTCCTTCCTAAAGAGCACTTTTGTATTGTAATTTA
A_23_P54918	0.004098543	3.746729E-5	up	1.4317873	LDHD	Homo sapiens lactate dehydrogenase D (LDHD), transcript variant 1, mRNA [NM_153486]	CCCTTCACCTGGTGACAGGAACACTCCTTTCCTGGTATGGAACGTGAGCTCCCGTGACAT
A_23_P318284	0.0093512405	1.8632815E-4	up	1.2053813	GPD1L	Homo sapiens glycerol-3-phosphate dehydrogenase 1-like (GPD1L), mRNA [NM_015141]	CAGCCAATCTGTGAATGTAAAAACTACACTGTTGCCTTGCTAGGATCCACCCTCCTATAA
A_24_P95029	0.010133533	2.1983706E-4	down	-1.2214775	TAX1BP1	Homo sapiens Tax1 (human T-cell leukemia virus type I) binding protein 1 (TAX1BP1), transcript variant 1, mRNA [NM_006024]	TGCTTTGATTCCAGCTTTGATGTTCACAAGAAGTGTCCCCTCTGTGAGTTAATGTTTCCT
A_23_P398637	0.0053937337	7.075654E-5	down	-1.7398546	TRMT10A	Homo sapiens tRNA methyltransferase 10 homolog A (S. cerevisiae) (TRMT10A), transcript variant 1, mRNA [NM_152292]	GGCCCATATCTTATCTAGGATGTTGGTGGCAAGAAGGTGAAGATTACTACCTCTTTTGAT
A_23_P375165	0.008165452	1.4903903E-4	up	2.1170678	TEX19	Homo sapiens testis expressed 19 (TEX19), mRNA [NM_207459]	GGGAGAGCTGGTTTTAAATGTTGGCCGTTGATGCAATTTAACCATTTAATTCCTGTTGCT
A_23_P145786	0.0025358961	1.1745119E-5	up	2.2765195	MLXIPL	Homo sapiens MLX interacting protein-like (MLXIPL), transcript variant 1, mRNA [NM_032951]	CCTTGGGTGACTCGTCCGCTGTCTTTGGACCGCTGTGTTTCAATCTGCAAAATGGGGATG
A_33_P3234697	0.0028768918	1.6494096E-5	down	-1.276429	LXN	Homo sapiens latexin (LXN), mRNA [NM_020169]	GGCATCTAGCTTATGAGGCCAAATAATCCCAAAGTGTCACTTTATATAAATGTCTTGATT
A_23_P109636	0.00935716	1.8663051E-4	up	1.1792716	LRIG1	Homo sapiens leucine-rich repeats and immunoglobulin-like domains 1 (LRIG1), mRNA [NM_015541]	AAAGGACAGCCCTTGACCTGGGTTCTGGGTATAATTTGCACTTTTGAGACTGGTAGCTAA
A_23_P140423	0.008090207	1.4598508E-4	down	-1.2633353	NDUFB1	Homo sapiens NADH dehydrogenase (ubiquinone) 1 beta subcomplex, 1, 7kDa (NDUFB1), mRNA [NM_004545]	GGATGTTATTTAGACAGAAAGAGTGATGAACGGCTAACTGCCTTCCGGAACAAGAGTATG
A_24_P360206	0.009871443	2.066387E-4	up	1.5549407	PCDHA11	Homo sapiens protocadherin alpha 11 (PCDHA11), transcript variant 1, mRNA [NM_018902]	TCTTACTAACACCTATGATGTTACCTGAAATCAATCTCCCATATGTATGCTGTATGCTAT
A_23_P79622	0.004686593	5.0709306E-5	down	-1.7419271	FKBP7	Homo sapiens FK506 binding protein 7 (FKBP7), transcript variant 1, mRNA [NM_181342]	AATGACCATGATGGTGATGGCTTCATTTCTCCCAAGGAATACAATGTATACCAACACGAT
A_23_P345808	0.005780156	7.940181E-5	down	-3.6836662	FAM133A	Homo sapiens family with sequence similarity 133, member A (FAM133A), transcript variant 2, mRNA [NM_173698]	TTCTTGGAACATTATAGTGATGCCATGTTAGATTACCTTGGAGCTTCATAACTTTAGCTT
A_33_P3416574	0.0037125174	2.8556798E-5	down	-1.1781626	AIG1	Homo sapiens androgen-induced 1 (AIG1), transcript variant 1, mRNA [NM_016108]	CAAGAAGCTCATCTCTCTCCGGGACTGGATGTTAGCTGTGTTGGCCTTTCCTGTTGGGGT
A_33_P3257993	0.010133533	2.2093547E-4	up	2.8003416	RNF125	Homo sapiens ring finger protein 125, E3 ubiquitin protein ligase (RNF125), mRNA [NM_017831]	GTGCCAAGTGTCTTTCATTTGGAAGTGAACTTACTCCAGTTATTGAATGTTTATCATATC
A_33_P3340782	0.003904076	3.1964177E-5	down	-1.6947459	SPINK5	Homo sapiens serine peptidase inhibitor, Kazal type 5 (SPINK5), transcript variant 3, mRNA [NM_001127699]	CCAAAATAACCATTTTACTTTTCACCTTCAGAATTTTGCATTCTTCTCCAGCTTTGGGAA
A_23_P96087	0.0041066953	3.791796E-5	up	1.3368647	H1FX	Homo sapiens H1 histone family, member X (H1FX), mRNA [NM_006026]	CCAAGAAGGTTCCGTGGTTCGACCAGCAGAATGGGCGCACCTACCTCAAGTACTCGATCA
A_33_P3234347	0.018547265	6.4079615E-4	down	-1.3918782	AMMECR1	Homo sapiens Alport syndrome, mental retardation, midface hypoplasia and elliptocytosis chromosomal region gene 1 (AMMECR1), transcript variant 3, mRNA [NM_001171689]	GGAAGATGACCTTCATTTTATGGTTATGTGTGTGTGTCTGTGTGTCTTTGGAAAAATATA
A_23_P408271	0.005963682	8.533146E-5	down	-1.3344599	HSD17B11	Homo sapiens hydroxysteroid (17-beta) dehydrogenase 11 (HSD17B11), mRNA [NM_016245]	CACCTAGTTTTCTGAAAACTGATTTACCAGGTTTAGGTTGATGTCATCTAATAGTGCCAG
A_33_P3377750	9.473937E-4	1.1016423E-6	up	2.1384616	KLC3	Homo sapiens kinesin light chain 3 (KLC3), mRNA [NM_177417]	GAAGAGAGCCATGTCACTCAACACACTGAACGTGGATGCTCCAAGGGCTCCTGGGACTCA
A_23_P502047	0.0070227194	1.1362978E-4	up	2.3847828	CHRD	Homo sapiens chordin (CHRD), mRNA [NM_003741]	TTGGGATTTTTAATTTATCTTCACTCAGCACCAAGGGCCCCCGACACTCCACTCCTGCTG
A_23_P82979	0.0024237537	1.0829578E-5	up	2.2598433	LAMC3	Homo sapiens laminin, gamma 3 (LAMC3), mRNA [NM_006059]	CTGTGAACTCGACCCCGTGTGGATAGTCACACTCCCTGCCGATTCTGTCTGTGGCTTCTT
A_24_P252497	0.0024237537	1.0536045E-5	down	-1.1524173	TRIB1	Homo sapiens tribbles pseudokinase 1 (TRIB1), transcript variant 1, mRNA [NM_025195]	ACTAACGCTCTCGTGGTTGCTCGACTGTTGTATCTGTGATACATTATCCGACTAAGGACT
A_23_P209904	0.009871443	2.0674906E-4	up	1.1301627	GPC1	Homo sapiens glypican 1 (GPC1), mRNA [NM_002081]	AGGTCCCCGGTTGCTGGTCAGGTCCCCATGGCTTGTTCTCTGGAACCTGACTTTAGATGT
A_23_P314584	0.015927594	4.825835E-4	up	1.1747979	MAPKAPK3	Homo sapiens mitogen-activated protein kinase-activated protein kinase 3 (MAPKAPK3), transcript variant 3, mRNA [NM_004635]	AGTGGCTGGTTGGGAGCAGAGCTAAGTGGCTTCCCATTAACCTGAGGTCTCTTTCTTTAC
A_33_P3389634	0.004111762	3.844185E-5	up	1.2919142	CAPG	Homo sapiens capping protein (actin filament), gelsolin-like (CAPG), transcript variant 1, mRNA [NM_001747]	ATTCTGCCTCAGGGCCATGAGAGTCCCATCTTCAAGCAATTTTTCAAGGACTGGAAATGA
A_33_P3236222	0.005389344	6.987183E-5	up	189.97043			TTTCCCAAGAGCACGCATTGCGGGTCTGATGCGGTCTATCACTGGCAGTTCGGTGTCTGA
A_21_P0005430	0.014937054	4.301038E-4	down	-2.3329003	XLOC_006249	BROAD Institute lincRNA (XLOC_006249), lincRNA [TCONS_00013590]	CAAAACTGGATCAAAACGAACGCCAAGTGCTTACTTTGAAAAAATAGGCAAATGGTGGTG
A_23_P253301	0.011716369	2.826393E-4	up	1.4138528	PFN2	Homo sapiens profilin 2 (PFN2), transcript variant 1, mRNA [NM_053024]	CTGCAGTAGTTTGCTTTTAGTATTGTTGTTGCACTTGAGCAGAGACAAACCTTTATTCAT
A_23_P257231	0.012174873	3.0524898E-4	up	1.3830792	ETNPPL	Homo sapiens ethanolamine-phosphate phospho-lyase (ETNPPL), transcript variant 1, mRNA [NM_031279]	AGAGCAAAGTATAACAGGTGCCTTCACTTTTGAGACTTAGTGCCTTAAAATATGTATTCT
A_23_P142724	0.011406713	2.7191735E-4	down	-1.078311	RPL37A	Homo sapiens ribosomal protein L37a (RPL37A), mRNA [NM_000998]	GGCGACATGGCCAAACGTACCAAGAAAGTCGGGATCGTCGGTAAATACGGGACCCGCTAT
A_32_P2738	0.012938069	3.406701E-4	up	1.090027	TCTN3	Homo sapiens tectonic family member 3 (TCTN3), transcript variant 1, mRNA [NM_015631]	AGAACCTCACCTGCTCATGACCAGAGAGCATTTAGGATAATAGAGGACCTAACTGAAGGA
A_33_P3238250	0.0023004531	9.365105E-6	up	2.6282072	F11R	Homo sapiens F11 receptor (F11R), mRNA [NM_016946]	AAGCCAAAAGGATTTAAAACCGCTGCTCTAAAGAAAAGAAAACTGGAGGCTGGGCGCAGT
A_21_P0000045	0.015328658	4.4940886E-4	up	9.350737	MS4A12	Homo sapiens membrane-spanning 4-domains, subfamily A, member 12 (MS4A12), transcript variant 1, mRNA [NM_017716]	AGGTGAAGGATCAGAGGACTGAAAAATGATTCTGCAACTCTCTTAAAGTTAGAAATGTTT
A_33_P3399090	0.008090207	1.4611498E-4	up	1.1283729	DIXDC1	Homo sapiens DIX domain containing 1 (DIXDC1), transcript variant 1, mRNA [NM_001037954]	GTGATAACCAGTTTTAACTGCCGGTATGTACCAGATTTGTGAACTAATTTAAAAAACCAC
A_33_P3228558	0.009373224	1.87339E-4	up	1.808824	ARHGAP27	Homo sapiens Rho GTPase activating protein 27 (ARHGAP27), transcript variant 4, mRNA [NM_001282290]	CACAGGGGCCTCATACCATATGTCTAAATATTTAAAAGTTATCAATCAAGCTAACAACTG
A_21_P0013283	0.010285046	2.2988983E-4	up	1.5695876	LOC101927630	PREDICTED: Homo sapiens uncharacterized LOC101927630 (LOC101927630), transcript variant X1, misc_RNA [XR_242134]	CCTTGTCTCTGATAGAATTGGCCTGTTGTGGACGGGCTTTGTGTAGATTAGAGAAAGAAG
A_23_P61268	0.0027449648	1.4078169E-5	up	1.1773827	FAM203A	Homo sapiens family with sequence similarity 203, member A (FAM203A), mRNA [NM_016458]	TGAAGGAGCTTAGCTTGTCTTCTTGGCAATTCACAATGCCTCACTCCACACCCTAAAACT
A_19_P00316405	0.012048915	2.98023E-4	up	1.3623215	C17orf51	Homo sapiens chromosome 17 open reading frame 51 (C17orf51), mRNA [NM_001113434]	CAGGAGAACTGCTCCATGTTGGCTCAGCAGAATGTTATTATAGGTAGCTCAAAAAGAGAG
A_24_P870620	0.008635271	1.620209E-4	down	-1.3787767	PTN	Homo sapiens pleiotrophin (PTN), mRNA [NM_002825]	CACTCGGACTGGAGCTGAGTGCAAGCCCATGAAGACCCAGAGATGTAAGATCCCCTGCAA
A_19_P00810523	0.015675968	4.6837277E-4	up	1.1332754	NDUFAF2	Homo sapiens NADH dehydrogenase (ubiquinone) complex I, assembly factor 2 (NDUFAF2), mRNA [NM_174889]	TTATGAAAAAGAAAAACTCCTTAGTAAAGAGACCAGTGAGGAACTCCTGCCTCCACCAGT
A_24_P229884	0.010133533	2.2055057E-4	up	2.428377	SMIM22	Homo sapiens small integral membrane protein 22 (SMIM22), transcript variant 1, mRNA [NM_001253790]	GACTGAAGAGCCACCAGTTTTTCCAGTCCACATGGGACACTGTTGCCTTCATTGTTTTCC
A_33_P3359900	0.016085858	4.94252E-4	up	1.5901986	EMB	Homo sapiens embigin (EMB), mRNA [NM_198449]	CTCAGCAGGAGCTTCATCAACGATATATGTCAGATCTAAAGGTATATTTTCATTCTGTAA
A_33_P3312217	0.0037125174	2.7995848E-5	up	177.85703			TCAGGAGTGAGGATGTCATGGACCTCACAGAAGGTGACAGTGAGGCTTCAGCCTCAGCTC
A_33_P3772937	0.0021564614	8.287707E-6	up	2.3824697	KRT8P12	Homo sapiens mRNA; cDNA DKFZp434C107 (from clone DKFZp434C107) [AL133645]	TGTCTGAGTCCTCTGACTTCCTGCCCAAGTGAACAACTGTGGCAGCTCCTCCTAGTCTGC
A_33_P3354683	0.018036911	6.109194E-4	up	1.0788718	PIGS	Homo sapiens phosphatidylinositol glycan anchor biosynthesis, class S (PIGS), mRNA [NM_033198]	GTAAAGTGTCTGGCGTGTAGTAGGCTCTTAATAAACACTGGCTGAATATGAATTGGAATG
A_24_P360722	0.005017074	5.8939146E-5	down	-6.139585	DIP2C	Homo sapiens DIP2 disco-interacting protein 2 homolog C (Drosophila) (DIP2C), mRNA [NM_014974]	GGCTTTAGGTTGGCAAATAGCACTGTTTTCTTAGCTGCAAGAATTCATTGCACAATGTTT
A_33_P3290667	0.0067560175	1.0733711E-4	up	1.1701452	SELT	Homo sapiens selenoprotein T (SELT), mRNA [NM_016275]	CTTGACAATGAAATGAAGCTCAATGTGCATATGGATTCAATCCCACACCATCGATCATAG
A_32_P67623	0.002216088	8.778921E-6	down	-3.026015	FAM120C	Homo sapiens family with sequence similarity 120C (FAM120C), transcript variant 1, mRNA [NM_017848]	ATGCCTCAGGAGTTGTTCTGTGATGGAAATTGGTCTGTTGTTCTGTTAATGCTGATGGAA
A_33_P3373259	0.0024237537	1.0540093E-5	down	-1.4019309	CACNA2D3	Homo sapiens calcium channel, voltage-dependent, alpha 2/delta subunit 3 (CACNA2D3), mRNA [NM_018398]	AAATGCTATGGTGAATCGAAAGACGGGGAAGTTTTCCATGGAGGTGAAGAAGACAGTGGA
A_23_P4662	0.0128173735	3.351954E-4	down	-1.4427217	BCL3	Homo sapiens B-cell CLL/lymphoma 3 (BCL3), mRNA [NM_005178]	TACCAGATAACTGAGGAGGGGAGAGGTGGGCCGTAACGGGCACGGATCACGATGTAAATT
A_21_P0007329	0.01359707	3.6931934E-4	up	1.4695655		PREDICTED: Homo sapiens uncharacterized LOC101928260 (LOC101928260), misc_RNA [XR_242859]	TTACAACATCTCTCTGAAAGAATCCGGGCTGCCAGTTTCATTTGGTTTGGGTGTCAGTAG
A_21_P0014944	0.016613431	5.2617874E-4	up	1.2122151		ALU4_HUMAN (P39191) Alu subfamily SB2 sequence contamination warning entry, partial (11%) [THC2550705]	CAACTCAACCTCCTCTTTCTGCCTCTACCCAAATTTTAAAACTTTTAAACATGGGTTTAA
A_23_P151506	0.004648332	4.9012742E-5	up	1.9331745	PLEK2	Homo sapiens pleckstrin 2 (PLEK2), mRNA [NM_016445]	CATCTTCATGTTACAAACCTGGAAAGGCTAGAACAGCCATTAGGCGTCAGCATCTTGACT
A_24_P391368	0.0049180277	5.602436E-5	down	-1.2476233	ATXN10	Homo sapiens ataxin 10 (ATXN10), transcript variant 1, mRNA [NM_013236]	TCTCATCTCATTCGTCTGATTGGAAATCTGTGTTACAAGAATAAAGATAACCAAGACAAG
A_23_P87709	0.0020299384	6.613984E-6	down	-3.0685718	PLBD1	Homo sapiens phospholipase B domain containing 1 (PLBD1), mRNA [NM_024829]	GACTAGAAGACTGTAAATAAGATACCAAAGGCACTATTTTAGCTATGTTTTTCCCATCAG
A_23_P330070	0.0051966785	6.3931955E-5	down	-2.02138	TFPI	Homo sapiens tissue factor pathway inhibitor (lipoprotein-associated coagulation inhibitor) (TFPI), transcript variant 2, mRNA [NM_001032281]	GCCTTCTGCATTCATGCATCCATGTTCTTTCTAGGATTGGATAGCATTTCATGCCTATGT
A_23_P55706	0.004558514	4.671805E-5	up	1.8579493	RELB	Homo sapiens v-rel avian reticuloendotheliosis viral oncogene homolog B (RELB), mRNA [NM_006509]	CAGACTTGAAGGTGGGGGGTAGGTTGGTTGTTCAGAGTCTTCCCAATAAAGATGAGTTTT
A_23_P130158	0.011406713	2.7177972E-4	up	1.4830384	WNT3	Homo sapiens wingless-type MMTV integration site family, member 3 (WNT3), mRNA [NM_030753]	GAAGGGGGCTTTCTTTTTAGTTCTCTAGGGTCTGATAGGAACAGACCTGAGGCTTATCTT
A_33_P3334313	0.0073562358	1.2453944E-4	down	-1.4133846	ACTR3B	Homo sapiens ARP3 actin-related protein 3 homolog B (yeast) (ACTR3B), transcript variant 1, mRNA [NM_020445]	TAGAGAAAACAACATTAGAAAATGGCGCAAAATCGTTAGGTCCCAGGAGAGAATGTGGGG
A_23_P51548	0.006565009	1.01459256E-4	down	-1.6133723	MGST3	Homo sapiens microsomal glutathione S-transferase 3 (MGST3), mRNA [NM_004528]	CATCTTGGTTGGGTTAAAAGTGGCTTGGGCAGTGGACCCAAATGCTGCCATTAAAGAATT
A_33_P3414591	0.005395294	7.103129E-5	down	-1.7144595	TWIST1	Homo sapiens twist family bHLH transcription factor 1 (TWIST1), mRNA [NM_000474]	AAGCTGAGCAAGATTCAGACCCTCAAGCTGGCGGCCAGGTACATCGACTTCCTCTACCAG
A_23_P42087	0.011265313	2.657636E-4	down	-1.1813939	BPHL	Homo sapiens biphenyl hydrolase-like (serine hydrolase) (BPHL), transcript variant 1, mRNA [NM_004332]	GCTTGATCGTGTTGCTGCCTGTTAACATGATGCCTTTGAAACTCTCCGCCTTTGAAACTT
A_21_P0011361	0.0190011	6.628421E-4	up	2.4506505	LOC101059918	Homo sapiens golgin subfamily A member 8R-like (LOC101059918), mRNA [NM_001282484]	AGATTTGCACATTAAAGAAAGAGAAGCAGGATATGCGTTGGGTAGAGCAGCTGGAGTGGA
A_23_P136405	0.0050779954	6.152836E-5	up	2.8581977	PDCD1	Homo sapiens programmed cell death 1 (PDCD1), mRNA [NM_005018]	GCTGGGACAAGGGATCCCCCTTCCCTGTGGTTCTATTATATTATAATTATAATTAAATAT
A_33_P3395513	0.00887374	1.6925993E-4	down	-2.1230445	NRG2	Homo sapiens cDNA FLJ42513 fis, clone BRACE2046295, highly similar to Pro-neuregulin-2, membrane-bound isoform precursor. [AK124504]	AAAGGACATTATTAATAGTTACACTGGAACATCAAGAACAAACAGGCAGCCGGGCGCGGT
A_33_P3396270	0.013977395	3.856669E-4	down	-1.4314609	SLC9A4	Homo sapiens solute carrier family 9, subfamily A (NHE4, cation proton antiporter 4), member 4 (SLC9A4), mRNA [NM_001011552]	CTGAGAATGATGATTTTCAATTTCATCCATGTCCCTACAAAGGACATGAACTCATCATTT
A_23_P160720	0.010644903	2.446236E-4	up	1.5922357	BATF3	Homo sapiens basic leucine zipper transcription factor, ATF-like 3 (BATF3), mRNA [NM_018664]	ATACCTGGGAGGAAGGCTTTTCCTTCACAATTGTATACAGGGGGCACCTGTGGCCAGGCC
A_33_P3248354	0.011366815	2.701744E-4	down	-1.1316172	OLFM1	Homo sapiens olfactomedin 1 (OLFM1), transcript variant 2, mRNA [NM_006334]	AACCAAATGAAAGGACTGGAGTCCAAGTTCAAACAGGTGGAGGAGAGTCATAAGCAACAC
A_33_P3234457	0.019379498	6.8036804E-4	up	1.1816349	FBRSL1	fibrosin-like 1 [Source:HGNC Symbol;Acc:29308] [ENST00000542061]	GAAGCGCAGGGCTTATTTTTCTGATTAAAGAAAATAAAAAGTGCCGTGCCACTATTTTTT
A_33_P3282075	0.0024237537	1.0693596E-5	up	1.2967973	SP6	Homo sapiens Sp6 transcription factor (SP6), transcript variant 1, mRNA [NM_001258248]	GAGGGGGTAGGAGGAGGGAGAAACAGCCTGTGTTTTTTATGCAATAAAGTCATCAACTAC
A_23_P201979	0.0039493167	3.3881493E-5	down	-1.4054084	CREM	Homo sapiens cAMP responsive element modulator (CREM), transcript variant 19, mRNA [NM_183013]	AGATTGTATTGCTGTCCTTGAATGCCATAGTCAAAGAGAGTTTTTAATAGAACCATGTTG
A_33_P3400389	0.016203025	5.010455E-4	down	-1.2129542	SPATS2L	Homo sapiens spermatogenesis associated, serine-rich 2-like (SPATS2L), transcript variant 5, mRNA [NM_001282735]	CCGTATGGTTGTGTCATCCTCTCTTAATCATTTTTACTAATTCTAATAATCAGCTCTAGC
A_33_P3403361	0.016344106	5.099178E-4	up	1.2639284	TIMM23	Homo sapiens translocase of inner mitochondrial membrane 23 homolog (yeast) (TIMM23), transcript variant 1, mRNA [NM_006327]	ATTTTACCTACCGGAGCTAATAAAACCCGGGGCAGATTTGAGCTGGCCTTCTTTACGATT
A_33_P3309491	0.010307133	2.3174404E-4	up	1.5404197	PTPRU	Homo sapiens protein tyrosine phosphatase, receptor type, U (PTPRU), transcript variant 3, mRNA [NM_005704]	GGAGGCATAAGCTGATGTTTGTAAAGCGCTTTGTAAATAAACGTGCTCTCTGAATGCCAC
A_33_P3268910	0.017018246	5.4671435E-4	down	-1.1445053	SPRY1	Homo sapiens sprouty homolog 1, antagonist of FGF signaling (Drosophila) (SPRY1), transcript variant 1, mRNA [NM_001258038]	AAGGGACGACGCCCGCCTTTCTCTCTCCGAGAAGGATCCCCAAACCTCACTCTCTTCACT
A_23_P43273	0.007857301	1.3813266E-4	down	-1.2602748	EXT1	Homo sapiens exostosin glycosyltransferase 1 (EXT1), mRNA [NM_000127]	ACGACTACTCCATGGTGTTGACAGGAGCTGCTATTTACCACAAATATTATCACTACCTAT
A_23_P6413	0.018816037	6.535311E-4	down	-1.1900027	SELM	Homo sapiens selenoprotein M (SELM), mRNA [NM_080430]	CCTGAGTCCTGGAGACAGAATGAAGCGCTCAGCATCCCGGGAATACTTCTCTTGCTGAGA
A_23_P88909	0.011575158	2.7832028E-4	up	1.7334994	SYNGR3	Homo sapiens synaptogyrin 3 (SYNGR3), mRNA [NM_004209]	ACAGGCTGCTAGAACAGCCCAGCCCTGTCAGTGTTGTGATCATGGTCCAGTCTTCGGGTT
A_24_P684186	0.0025523647	1.2144504E-5	up	1.7191893	EMB	Homo sapiens embigin (EMB), mRNA [NM_198449]	GCTTGACTAACCCCAGATTATCTTTCAAGACTTTAATCTGATCTTGTGTCTTAGAGAAGC
A_32_P152696	0.0090676695	1.767462E-4	up	1.1493783			CGACAGGCCTCAGGATTTTGTGTTGATCAAGTTCCAAGGAAAAGGAACATCTCGGCCAGG
A_33_P3351559	0.008996461	1.7411704E-4	down	-1.5921563	ETNK1	Homo sapiens ethanolamine kinase 1 (ETNK1), transcript variant 1, mRNA [NM_018638]	GGATAAAATGAGGTTGGCAGTGAAGAAAATTAAAAACAGCCTCATTCATGTAACTGGTTA
A_23_P151046	0.016496178	5.185637E-4	down	-1.479671	KLRC1	Homo sapiens killer cell lectin-like receptor subfamily C, member 1 (KLRC1), transcript variant 1, mRNA [NM_002259]	GGTTGAAATAGGAGATGACCTCTAACTGATAGAACGTTACTTTGTGTCGTGATGAAAACT
A_33_P3358397	0.0070913723	1.1544322E-4	up	3.6309464	LGI2	Homo sapiens leucine-rich repeat LGI family, member 2 (LGI2), mRNA [NM_018176]	CAGACTACAGTGGATGTATTTTAGGCTGTATACATATTTAGCTCTTTTTGGTAAATAGGG
A_33_P3391796	0.004686593	5.058782E-5	up	1.6552902	NOG	Homo sapiens noggin (NOG), mRNA [NM_005450]	GCACTGTTTAACTGTGTAGGAATGTATATGTGTGTGTATATACGGTCCCAGTTTTAATTT
A_23_P382094	0.01867587	6.473672E-4	up	1.9607278	LINC00052	Homo sapiens long intergenic non-protein coding RNA 52 (LINC00052), long non-coding RNA [NR_026869]	CCCAGAGGAAGTCAAAGATATGGACACTCTAAGACTCAGAAGAACTTTCTCAGGCATTCA
A_23_P1029	0.0053937337	7.079814E-5	up	1.1513052	MFAP2	Homo sapiens microfibrillar-associated protein 2 (MFAP2), transcript variant 1, mRNA [NM_017459]	CCGCCTCTACTCCATACACAGGCCTTGCAAACAGTGTCTCAACGAGGTCTGCTTCTACAG
A_24_P270728	0.0028768918	1.6491393E-5	up	1.3217852	NUPR1	Homo sapiens nuclear protein, transcriptional regulator, 1 (NUPR1), transcript variant 1, mRNA [NM_001042483]	TATTCCCGCTGACTGAGTCTCTGAGGGGCTACCAGGAAAGCGCCTCCAACCCTAGCAAAA
A_23_P27795	0.0027897668	1.4836773E-5	up	3.5384173	SPINT2	Homo sapiens serine peptidase inhibitor, Kunitz type, 2 (SPINT2), transcript variant a, mRNA [NM_021102]	CCCCGAGTTGTTTCCTCGCTGATCGATTTCTTTCCTCCAGGTAGAGTTTTCTTTGCTTAT
A_23_P134085	0.007352753	1.2433557E-4	down	-1.7711601	CNKSR3	Homo sapiens CNKSR family member 3 (CNKSR3), mRNA [NM_173515]	ATATCTTGGAAAGCCTCATGGTCACTAATTTTCAACTAGCATCAGGTATTTTGAAAACGT
A_33_P3341586	0.01819962	6.2096963E-4	down	-1.2712505	SIL1	Homo sapiens SIL1 nucleotide exchange factor (SIL1), transcript variant 1, mRNA [NM_001037633]	TTGGGAAGTCGCTTAATTGCTCTGAGCTTGTTTCCTCATCTGTCAGGAGTGCCATTAAAG
A_23_P37415	0.0077662	1.3576577E-4	down	-1.4308207	SECISBP2L	Homo sapiens SECIS binding protein 2-like (SECISBP2L), transcript variant 2, mRNA [NM_014701]	CTCTGATTCTAATTACACAACGCAAACTACGTAACTCAGGAAATGTCGGCTCTCTATCTC
A_19_P00318409	0.003468727	2.3292017E-5	up	1.2470983	NEAT1	Homo sapiens nuclear paraspeckle assembly transcript 1 (non-protein coding) (NEAT1), long non-coding RNA [NR_028272]	ACTAGGAGAAGGGAATGGTGGGTACACCGGTAGTGCTCTTTTGTTCTTGCTTCGTTTTTT
A_33_P3297444	0.0028768918	1.6561682E-5	up	1.5321062	ABTB1	Homo sapiens ankyrin repeat and BTB (POZ) domain containing 1 (ABTB1), transcript variant 1, mRNA [NM_032548]	TCCCATGCACAGGGCCATTCAGGAAGGGCTGGGGGAGTGTGTGTGGCAATAAAGCTTGAA
A_33_P3290602	0.010358487	2.3375447E-4	down	-1.3507026	MMP24-AS1	Homo sapiens MMP24 antisense RNA 1 (MMP24-AS1), transcript variant 1, long non-coding RNA [NR_102705]	GTTCCCTCATCCCAGGGAAATGACACACTCTGTATTTCTGTTTTATTTAGAAATGATTTA
A_23_P334263	0.017808208	5.91528E-4	down	-1.4266957	SENP8	Homo sapiens SUMO/sentrin specific peptidase family member 8 (SENP8), transcript variant 2, mRNA [NM_145204]	ATGGCTGCAATCTCAGTGCCTGAGGGAAGATGCCTAGTAGAGGAAAGCTTAATACTCTTT
A_21_P0004594	0.011964144	2.944805E-4	down	-1.3111728	GMDS-AS1	Homo sapiens GMDS antisense RNA 1 (head to head) (GMDS-AS1), long non-coding RNA [NR_046229]	TTCCCTTCCCTTTACTATGATAAATGGCTCCATTACTTAATAGGGCTAAATACTCTGCTG
A_23_P88106	0.010191871	2.2517367E-4	up	3.3726857	MCF2L	Homo sapiens MCF.2 cell line derived transforming sequence-like (MCF2L), transcript variant 2, mRNA [NM_024979]	TCAAAACTTTTGAAGCCCTTTCGGTGTCTAGTCTGCAGATGTTTTTGTATGTGTGCACCT
A_23_P154962	0.003600115	2.5756159E-5	up	1.8445278	RIMBP3	Homo sapiens RIMS binding protein 3 (RIMBP3), mRNA [NM_015672]	TTGCTGATAACTATGGCAGGTATACGGAGAAGCGCCTTTTTCTGTGGCCAATGTGTGTTT
A_23_P150053	0.0125951255	3.2394487E-4	up	1.4735619	ACTA2	Homo sapiens actin, alpha 2, smooth muscle, aorta (ACTA2), transcript variant 2, mRNA [NM_001613]	ATCATGAAGTGTGATATTGACATCAGGAAGGACCTCTATGCTAACAATGTCCTATCAGGG
A_23_P363399	0.0039364025	3.3049673E-5	up	1.2596438	SLC38A1	Homo sapiens solute carrier family 38, member 1 (SLC38A1), transcript variant 1, mRNA [NM_030674]	TTGGGGATGATTCTTACCTTGGTAATTAAATGAAGCTACACATTTGGGTAATCTAGCAAA
A_23_P313632	0.013421403	3.608975E-4	up	1.3618113	FUT8	Homo sapiens fucosyltransferase 8 (alpha (1,6) fucosyltransferase) (FUT8), transcript variant 1, mRNA [NM_178155]	CGGAACAGCTCCTTACTCTGAGGAAGTTGATTCTTATTTGATGGTGGTATTGTGACCACT
A_23_P166336	0.0055156816	7.3812014E-5	up	1.5201142	TMEM191A	Homo sapiens transmembrane protein 191A (pseudogene) (TMEM191A), non-coding RNA [NR_026815]	TTTATTTCTGGTGCACTCCTCTCCTGAGAGTGTAGACCAAGGTCGCCTAATAAACTCCTC
A_32_P210572	0.0076213954	1.3173227E-4	down	-1.2911818	C1orf53	Homo sapiens chromosome 1 open reading frame 53 (C1orf53), mRNA [NM_001024594]	TATGTTTGACAAGAATTTCATCTCTGTTCCCTAACTGTGCTTGTATTTTTTAAAAAATAA
A_21_P0001371	0.007341137	1.2399445E-4	up	1.9004678	ZNF717	Homo sapiens zinc finger protein 717 (ZNF717), mRNA [NM_001128223]	TGCAGAAGTTTATACGAGACCTAGTTTCCAGGGAAGAACTCACTGATTCCGCGAGGGAGA
A_23_P91390	0.002391709	1.0087422E-5	up	2.7082534	THBD	Homo sapiens thrombomodulin (THBD), mRNA [NM_000361]	ACAGGGTCTGCAAGGTCTTTGGTTCAGCTAAGCTAGGAATGAAATCCTGCTTCAGTGTAT
A_23_P143190	0.0052019074	6.448688E-5	up	1.3642284	MYBL2	Homo sapiens v-myb avian myeloblastosis viral oncogene homolog-like 2 (MYBL2), transcript variant 1, mRNA [NM_002466]	CTTCCAGCCTCACCCTGTCAGGTATCAAAGAAGACAACAGCTTGCTCAACCAGGGCTTCT
A_33_P3381751	0.0024237537	1.07166725E-5	up	14.139336	TIAM1	Homo sapiens T-cell lymphoma invasion and metastasis 1 (TIAM1), mRNA [NM_003253]	GCCATTGTCTCTTGTACATAAGGTCATGACGTGTCTATGTCAAAAGTTCTTATATATTTC
A_23_P128281	0.012751714	3.3171472E-4	down	-1.3872719	KLRC3	Homo sapiens killer cell lectin-like receptor subfamily C, member 3 (KLRC3), transcript variant 2, mRNA [NM_007333]	AAATGGTTTGGCTTTCAAACATGAGATAAAAGACTCAGATCATGCTGAACGTAACTGTGC
A_33_P3235004	0.01583105	4.764385E-4	up	1.5450268	MYH10	Homo sapiens myosin, heavy chain 10, non-muscle (MYH10), transcript variant 1, mRNA [NM_001256012]	CTGTTTACTTGAAGAAAAAAGCACCCGTGGAGAATAAAGAGACCTCAATAAACAAGAATA
A_33_P3268284	0.012442146	3.1653914E-4	down	-1.2924757	GDI2	Homo sapiens GDP dissociation inhibitor 2 (GDI2), transcript variant 1, mRNA [NM_001494]	TACATTGCCATAGTTAGTACGACTGTGGAAACCAAGGAGCCTGAGAAGGAAATCAGACCA
A_33_P3233906	0.019616282	6.9667393E-4	down	-6.1065063	RAMP1	Homo sapiens receptor (G protein-coupled) activity modifying protein 1 (RAMP1), mRNA [NM_005855]	CTTCCAGCCAAGAAGAGCTCACAGGAGTCCAGAGTAGCCGAGGCTCTGGTATTAACCTGG
A_23_P32165	0.015394619	4.5389836E-4	up	1.2275665	LHX2	Homo sapiens LIM homeobox 2 (LHX2), mRNA [NM_004789]	TGGCTAGAGCTTCTGTATTTTCAAAGACTGCCACGTGCCTTAGGAATACTGTTTTATCTC
A_33_P3255409	0.01571203	4.709986E-4	up	1.0788841	PIH1D1	Homo sapiens PIH1 domain containing 1 (PIH1D1), mRNA [NM_017916]	GAGATGTGGAGAAGAGGCTGCTGGCTTCCCTAAAAGTTGAAATAAAAGATTTTTGCCTTT
A_24_P636882	0.00644371	9.736394E-5	down	-1.3463782	STK17B	Homo sapiens serine/threonine kinase 17b (STK17B), mRNA [NM_004226]	TTTTCAGTTTGATATCTTGTCCTTATTCAATTGTTGTATAAACAACTGTACTTTAATTTC
A_24_P160401	0.018042542	6.126904E-4	up	3.656695	CDCP1	Homo sapiens CUB domain containing protein 1 (CDCP1), transcript variant 2, mRNA [NM_178181]	CATTGCAAACCGCTCATCTATAAAACGTCTGTGCATCATCGAGTCTGTGTTTGAGGGTGA
A_33_P3303717	0.012065918	2.999271E-4	up	2.2569833	ACADL	Homo sapiens acyl-CoA dehydrogenase, long chain (ACADL), mRNA [NM_001608]	GTCTTCTATAAACCAGGCTGTTAATACAATGATGACAAACAAAACTGGCAAGATCACTAA
A_32_P168442	0.006760008	1.0799294E-4	up	1.290415	HOTAIR	Homo sapiens HOX transcript antisense RNA (HOTAIR), transcript variant 3, long non-coding RNA [NR_047518]	CTTGAGACACATGGGTAACCTAATTATATAATGCTTGTTCCATACAGGAGTGATTATGCA
A_24_P309594	0.0073383	1.2355934E-4	up	1.4827746	SLC48A1	Homo sapiens solute carrier family 48 (heme transporter), member 1 (SLC48A1), mRNA [NM_017842]	CGCACTGCTCACTTCTGGGGGGCCCTTTCAGAGGCACTTTTAAAGCAAATAAAACATTTA
A_24_P131392	0.013826601	3.7850862E-4	down	-1.5073416	RMDN2	Homo sapiens regulator of microtubule dynamics 2 (RMDN2), transcript variant 1, mRNA [NM_144713]	CTATGCCCTGGTTATTCTAATCCCAATTACATGTACTTAGCAAAGTGTTATACTGATCTT
A_23_P142634	0.0013883632	2.3983878E-6	up	1.1216084	METTL5	Homo sapiens methyltransferase like 5 (METTL5), mRNA [NM_014168]	AATCAAGATAGATATTATAGCAGAACTTCGATATGACCTGCCAGCATCATACAAGTTTCT
A_23_P61960	0.004153269	3.9290666E-5	up	1.630332	ATP6V0E2	Homo sapiens ATPase, H+ transporting V0 subunit e2 (ATP6V0E2), transcript variant 1, mRNA [NM_145230]	TGAAGCAGAGAAACATTCACACACAAAAAGCAACATAGTCATGTGGGTCCAGATGGCCTC
A_33_P3318288	0.002010198	6.452502E-6	down	-2.2525663	CFH	Homo sapiens complement factor H (CFH), transcript variant 2, mRNA [NM_001014975]	AAGTTTGTACAGGGTAAATCTATAGACGTTGCCTGCCATCCTGGCTACGCTCTTCCAAAA
A_23_P426663	0.019504705	6.9052365E-4	up	1.4234293	MITF	Homo sapiens microphthalmia-associated transcription factor (MITF), transcript variant 1, mRNA [NM_198159]	ACAGTATAAAACAGCCCTATTTCTTGATAAAAAATGACAAATGACTGTCTCTTGCGGATG
A_33_P3386150	0.017954074	6.022197E-4	up	4.0861244	NRADDP	Homo sapiens neurotrophin receptor associated death domain, pseudogene (NRADDP), non-coding RNA [NR_024046]	ATTAAGCCTCAGCTGGTTTTGCTACTTTTGTAACCCATATTAAAGGTGATTCGGACTTTT
A_23_P86900	0.0148252295	4.2483964E-4	up	1.3510339	B3GNT1	Homo sapiens UDP-GlcNAc:betaGal beta-1,3-N-acetylglucosaminyltransferase 1 (B3GNT1), mRNA [NM_006876]	AATCAGATGAAGGCATAAAATTTAGTTCTTAGCTCTTGAACAGAAGCCTAAAATTCCTGG
A_23_P69030	0.0060213464	8.651258E-5	down	-1.2750043	COL8A1	Homo sapiens collagen, type VIII, alpha 1 (COL8A1), transcript variant 1, mRNA [NM_001850]	GTGTGGGTTGCTCTATTCAAGAACAACGAGCCCGTGATGTACACGTACGACGAGTACAAA
A_23_P70968	0.017042955	5.4915843E-4	down	-2.5204196	HOXA7	Homo sapiens homeobox A7 (HOXA7), mRNA [NM_006896]	GAAAAGCGTCTTTAAGAGACTCACTGGTTTTACTTACAAAAATGGGAAAAATAAAAGAAA
A_23_P359245	0.012022619	2.9666172E-4	up	1.185592	MET	Homo sapiens met proto-oncogene (MET), transcript variant 2, mRNA [NM_000245]	GTGTCTGGACAGATTGTGGGAGTAAGTGATTCTTCTAAGAATTAGATACTTGTCACTGCC
A_33_P3368610	0.009119716	1.7847962E-4	up	1.3393962	PPHLN1	Homo sapiens periphilin 1 (PPHLN1), transcript variant 5, mRNA [NM_201438]	TGAGTCAAACACAACACATGGGATAGAATTATTTGAAGATAGTCAGCTAACCACTCGCTC
A_33_P3312799	0.01832255	6.279768E-4	up	1.3752439		Q9UMX8_HUMAN (Q9UMX8) Melanoma antigen, complete [THC2774746]	TCCAAGGTGCCCTGACTCACCTTCTCTGCAGATGGAGGCAAGGAGACTCCACAGACAAAC
A_23_P331748	0.0014145512	2.9060889E-6	up	8.3306675	CD33	Homo sapiens CD33 molecule (CD33), transcript variant 1, mRNA [NM_001772]	GGGACCAAAGGCTGATTCTTGGAGATTTAACTCCCCACAGGCAATGGGTTTATAGACATT
A_21_P0012597	0.008090207	1.4627803E-4	down	-1.827062	XLOC_014512	BROAD Institute lincRNA (XLOC_014512), lincRNA [TCONS_l2_00020594]	TCTCCAAAATTCATCAATTAGGGTCACACAGCTGCTAATTGTTCTGTGTGGGGAACATGT
A_33_P3369401	0.012653803	3.265808E-4	up	2.161715	CYP24A1	Homo sapiens cytochrome P450, family 24, subfamily A, polypeptide 1 (CYP24A1), transcript variant 1, mRNA [NM_000782]	GAAAAAGAATGTGCATTGGTCGCCGATTAGCAGAGCTTCAACTGCATTTGGCTCTTTGTT
A_23_P71946	0.0039676973	3.446292E-5	up	3.945101	BSPRY	Homo sapiens B-box and SPRY domain containing (BSPRY), mRNA [NM_017688]	AGCTTTAGGAGGGATGGGGATCTGTTTCAGATCTAGGCATAACCTGTAAATCACAGGTGT
A_33_P3414422	0.0053485604	6.860798E-5	down	-1.1486784	GPHN	Homo sapiens gephyrin (GPHN), transcript variant 1, mRNA [NM_020806]	GATCTTGTACAGATATTAGTGTTACCAGCATTCATGTGGAAATCAAGAGCAAAGACAAAA
A_33_P3307495	0.0037125174	2.8828552E-5	down	-1.7631578	STRA6	Homo sapiens stimulated by retinoic acid 6 (STRA6), transcript variant 8, mRNA [NM_001199042]	TTTATGCCTTTGGCTATTATGAAAGAGGTTAGTGTGTTCCCTGCAATAAACTTGTTCCTG
A_23_P386561	0.018147191	6.17251E-4	down	-1.1073924	TWISTNB	Homo sapiens TWIST neighbor (TWISTNB), mRNA [NM_001002926]	ACCTGTTTGTAAAGCTTGTCTCTTAATCAAATTTGTCTTGACCAAATAAGTTTCCTGAGG
A_33_P3327333	0.007107877	1.1639229E-4	up	1.1400917	IRF3	Homo sapiens interferon regulatory factor 3 (IRF3), transcript variant 3, mRNA [NM_001197123]	TCTGATTACCTTCACGGAAGGAAGCGGACGCTCACCACGCTATGCCCTCTGGTTCTGTGT
A_23_P96965	0.018036911	6.1194255E-4	down	-1.4501538	SYNC	Homo sapiens syncoilin, intermediate filament protein (SYNC), transcript variant 1, mRNA [NM_030786]	ATAGTCAAAGACCATGGACAACAACTGTCATCTGAAGGACTCTTCTAGAAGCCAGAGACT
A_33_P3404316	0.009402029	1.8882255E-4	down	-1.462708	MIR100HG	Homo sapiens mir-100-let-7a-2 cluster host gene (non-protein coding) (MIR100HG), long non-coding RNA [NR_024430]	TATGTGACTTTGTCATATGTTCCTAACCCCCAATAAAAGCAATGTTGCATCAACTGTGAA
A_23_P14184	0.0190446	6.64735E-4	up	1.2097232	THSD1	Homo sapiens thrombospondin, type I, domain containing 1 (THSD1), transcript variant 1, mRNA [NM_018676]	TAGACTTTTGTGTAACTATTTGTACCGTAGGACAGAATGTGAGGAGGAAGTAACACACAG
A_24_P67395	9.6057507E-4	1.1737649E-6	up	2.728804	KRT8	Homo sapiens keratin 8 (KRT8), transcript variant 2, mRNA [NM_002273]	ATGAGATCAATAAGCGTACAGAGATGGAGAATGAATTTGTGCTCACCAAGAAGGATGTGG
A_21_P0003595	9.405121E-4	1.075104E-6	down	-1.3543528	XLOC_003501	BROAD Institute lincRNA (XLOC_003501), lincRNA [TCONS_00008036]	TTAGCTGTTTACCTACTTCCTGGAAAAATAGTAGCTCTCTGTAGCATTACGGAGTTTCAG
A_23_P150379	0.0023908122	9.9422805E-6	up	2.302013	MPZL2	Homo sapiens myelin protein zero-like 2 (MPZL2), transcript variant 2, mRNA [NM_144765]	TTCTGACATGTCCAGCCCATCTCTAATGAGGACTCCCAGATCATCACTTTATGGCTGTTA
A_33_P3353345	0.009871443	2.0709455E-4	down	-3.616317	SULT4A1	Homo sapiens sulfotransferase family 4A, member 1 (SULT4A1), mRNA [NM_014351]	GAGCACTACACATGATCCTTCTGTGCTTGCTTGCATCTTTAATAAAGACATGTTCCCGGC
A_33_P3353552	0.0140413055	3.8898326E-4	up	1.3223559	SLC48A1	Homo sapiens solute carrier family 48 (heme transporter), member 1 (SLC48A1), mRNA [NM_017842]	TAACTTGGGAGGGAAGGGGCTGTTGGTACAAGGATGATTTTCTGTTAGACTGCCATTTTG
A_23_P97123	0.0025523647	1.2135356E-5	down	-1.6475397	ANKRD36BP1	Homo sapiens ankyrin repeat domain 36B pseudogene 1 (ANKRD36BP1), non-coding RNA [NR_026844]	GTGTTAAGAAATACAATTAAAAAGCAAGATGGCCAAATTGAGCAGCTTCAGAAAATCCTG
A_23_P98900	0.0039920444	3.4933044E-5	down	-2.1212633	CCDC92	Homo sapiens coiled-coil domain containing 92 (CCDC92), mRNA [NM_025140]	TCATTCTCAAGTCGGAGCAACACATACCAACCTTGACCTTATCCTCAAGCTCCAGGGCAG
A_32_P216548	0.01618366	4.9790513E-4	up	1.4176376	LDLRAP1	Homo sapiens low density lipoprotein receptor adaptor protein 1 (LDLRAP1), mRNA [NM_015627]	GATGATGTGTGAAACCTGACACCTAGATTTATTTGGAAATATTCTATGACCACTTTACAG
A_23_P31873	0.0033736592	2.1778764E-5	up	1.2070936	RAB11FIP1	Homo sapiens RAB11 family interacting protein 1 (class I) (RAB11FIP1), transcript variant 3, mRNA [NM_001002814]	ATTCTCTCCTACAGTACTGGGACCACTGTAAACTTCTCAGATGACTTGTATTTTTGTAGT
A_23_P354387	0.015983984	4.8619794E-4	down	-1.2069247	MYOF	Homo sapiens myoferlin (MYOF), transcript variant 1, mRNA [NM_013451]	TCAAAAATCTCTGCATCCTGAGGTGATATACTTCATATTTGTAATCAACTGAAAGAGCTG
A_24_P367645	0.0052337507	6.4984786E-5	up	2.4703696	MAP7D2	Homo sapiens MAP7 domain containing 2 (MAP7D2), transcript variant 2, mRNA [NM_152780]	CTGAATGGGAAAAATGACACTAGAATGTATACTCCACACATTTTATGCCATATAATGGTG
A_33_P3563369	0.0128173735	3.3517653E-4	up	1.2282056	SNORA10	CM1-HT1146-090101-713-g10 HT1146 Homo sapiens cDNA, mRNA sequence [BG987537]	TGGGTTGGGGGACTTGCCTCAAGCACACCACTGACCCTCCTGGGGTTCTTTTGTTTTGCA
A_23_P37892	0.0052751345	6.685018E-5	up	1.1678675	GPT2	Homo sapiens glutamic pyruvate transaminase (alanine aminotransferase) 2 (GPT2), transcript variant 1, mRNA [NM_133443]	ATTTGCTTTCAAAATAAATAAGGTCAGCTAGTCTAGGAGGTTAACGTCGGGTAGGAATGC
A_23_P218892	0.0042528436	4.1479645E-5	up	1.2817997	EIF4G1	Homo sapiens eukaryotic translation initiation factor 4 gamma, 1 (EIF4G1), transcript variant 1, mRNA [NM_182917]	CATGACGGCTGTCTGCTATTCTGCAATTATTTTTGAGACTCCCCTCCGAGTGGACGTTGC
A_23_P251499	0.0067560175	1.07453954E-4	down	-1.6333057	PCOLCE	Homo sapiens procollagen C-endopeptidase enhancer (PCOLCE), mRNA [NM_002593]	CTCGTCCAGTTCGTCTCAGATCTCAGTGTCACCGCTGATGGCTTCTCAGCCTCCTACAAG
A_23_P354908	0.016700266	5.305747E-4	up	3.792626	NMNAT2	Homo sapiens nicotinamide nucleotide adenylyltransferase 2 (NMNAT2), transcript variant 1, mRNA [NM_015039]	ACACCTTAGGAATAGCATTGTAGTAATGGTGATGAATATGCTCTGCCAAATTCATCCAGT
A_21_P0010575	0.0027897668	1.4838044E-5	up	1.2856158			AAGAATTAAAGCAGCAGCCTTGGATCCAGAGATGGACGCCAATTGATGAAGACAGCAGAA
A_23_P133691	0.009871443	2.0686068E-4	up	5.823911	RRAGD	Homo sapiens Ras-related GTP binding D (RRAGD), mRNA [NM_021244]	CTGCTGTGATATGATAGATGTGGTTATTGACATCTCTTGTATTTATGGTCTCAAAGAAGA
A_19_P00805833	0.00344708	2.296287E-5	up	1.6829017		activating transcription factor 7 interacting protein 2 [Source:HGNC Symbol;Acc:20397] [ENST00000570163]	TCCTTGCTACTTGGTATCTTGAAATCTGGTACGAAACTATTGCATGATCCCTGCACCTTT
A_32_P152437	0.018036911	6.121437E-4	down	-1.3389356	AKAP12	Homo sapiens A kinase (PRKA) anchor protein 12 (AKAP12), transcript variant 1, mRNA [NM_005100]	TCAAATGTTCCCCCTCAGGTTATTTTGCTTATGGTACCCATGAGTTGCCTCTCTCTGTAC
A_24_P134356	0.0074580354	1.2773277E-4	down	-1.1031538	BTBD3	Homo sapiens BTB (POZ) domain containing 3 (BTBD3), transcript variant 1, mRNA [NM_014962]	TTAATTGCATCCTATCAGATTGTTGAGGTGGGTGTGATAGTCTTCAGGTGCAGTGCGTTC
A_24_P70993	0.0078107635	1.3669876E-4	down	-1.2401108	CD99	Homo sapiens CD99 molecule (CD99), transcript variant 1, mRNA [NM_002414]	CTAGTTCCTCCGGTAGCTTTTCAGATGCTGACCTTGCGGATGGCGTTTCAGGTGGAGAAG
A_24_P369898	0.012266167	3.0944037E-4	up	1.6151366	MYO15B	myosin XVB pseudogene [Source:HGNC Symbol;Acc:14083] [ENST00000579052]	GGAACCAGGGCTGGCTCGGTGGGACAGGGCCTCAGAGGTGAGGAAGATGGGAGAGGGACA
A_23_P147665	0.007913486	1.40836E-4	up	2.212009	OLFML1	Homo sapiens olfactomedin-like 1 (OLFML1), mRNA [NM_198474]	GCTGAAGCTCTTCCCTCTTTTTCAAATGTCTATTGATATTCTCCCATTTTCACTGCCCAA
A_33_P3367970	0.0049071717	5.5530312E-5	down	-1.5811394			AGTTCCACTGAACACCAGACCAAGCAATTCTGTCTGTTTACACTATTAGCCTAGTTTTCT
A_23_P63829	0.0044180234	4.509293E-5	down	-1.3152219	HSPA14	Homo sapiens heat shock 70kDa protein 14 (HSPA14), transcript variant 1, mRNA [NM_016299]	ATGGGAAGAACTCTGCCAAAGAGGAAACCAAGTTTGCACAGGTTGTACTCCAGGATTTAG
A_24_P935986	0.019519202	6.924568E-4	up	1.2197648	BCAT1	Homo sapiens branched chain amino-acid transaminase 1, cytosolic (BCAT1), transcript variant 1, mRNA [NM_005504]	ATGCTCTGAAGGTTTTGTAGAAGCACAATTAAACATCTAAAATGGCTTTGTTACACCAGA
A_33_P3255304	0.0064894618	9.899374E-5	down	-1.7984089	GGT5	Homo sapiens gamma-glutamyltransferase 5 (GGT5), transcript variant 1, mRNA [NM_001099781]	TCCCACCCTCTCGATCTGTATATCCTCCAGTCCAAGATTAAAGAGGCGGACTGTGGCCTG
A_23_P345942	0.015483498	4.571292E-4	up	1.0822132	NDUFAF2	Homo sapiens NADH dehydrogenase (ubiquinone) complex I, assembly factor 2 (NDUFAF2), mRNA [NM_174889]	GACCAATTCGGGAACAAATACTACTACATCCCGCAGTACAAGAACTGGAGAGGACAAACT
A_23_P128375	0.015514253	4.598863E-4	up	1.5045128	FAM222A	Homo sapiens family with sequence similarity 222, member A (FAM222A), mRNA [NM_032829]	TGTCCCACACGATCAAGGCAGGGAAAGATAGGCAGGAGTCCCCTCACGAAGTCCTCAAGT
A_33_P3260530	0.0024996835	1.1333302E-5	down	-1.5903149	KANK4	Homo sapiens KN motif and ankyrin repeat domains 4 (KANK4), mRNA [NM_181712]	TTTGAGTAGCAAGCCTCTGGCCTATCCTTATTGTTTGTTATATTAAAATGCTGCCTCTCA
A_23_P86751	0.0033736592	2.1478081E-5	down	-2.7823977	ADARB2	Homo sapiens adenosine deaminase, RNA-specific, B2 (non-functional) (ADARB2), mRNA [NM_018702]	GGTTAGCTACCACCCTATAACCTCCCTACCAGGTAATAAGGAGACCAAGTCTTTGATCAA
A_21_P0003976	2.7860372E-4	3.843643E-8	up	2737.847		DA675095 NETRP2 Homo sapiens cDNA clone NETRP2005971 5', mRNA sequence [DA675095]	CCTCTTTGAGTTACCATTTGTTTCTGCTTATAACCTACTGATCATGCCTTTAGTACTAAG
A_19_P00801088	0.0054890052	7.291412E-5	up	3.2797587	ANKRD20A12P	Homo sapiens ankyrin repeat domain 20 family, member A12, pseudogene (ANKRD20A12P), non-coding RNA [NR_046228]	CCTGGAGCTCTCATTTTCAAGAGATATCCATTTGCTAACTTTATTCAAGAAATGTGACTA
A_32_P116206	0.0020299384	6.644404E-6	down	-2.5853176	RELL1	Homo sapiens RELT-like 1 (RELL1), transcript variant 1, mRNA [NM_001085400]	GTCAAGTGTATTTTTAACTGTCTGGTTTGTACTTTTATGACTTTTGTACTACCAAAGCGG
A_21_P0006870	0.0029712096	1.771095E-5	up	1.228372	XLOC_008479	BROAD Institute lincRNA (XLOC_008479), lincRNA [TCONS_00018197]	GCTCTGTTGAATCCACTGGAGATTGTCCTGATACTAAGGACAAGTATCTGCTCCTATCAG
A_23_P255601	0.0058179153	8.032908E-5	up	1.3143247	TMEM185A	Homo sapiens transmembrane protein 185A (TMEM185A), transcript variant 1, mRNA [NM_032508]	AACACCAAGCAAGAGATGGTCCATGCTTTTCTGACGTTCTCAGAATAGTGGCTAGCTTCA
A_24_P345451	0.010970493	2.549459E-4	down	-1.4644828	CYBRD1	Homo sapiens cytochrome b reductase 1 (CYBRD1), transcript variant 1, mRNA [NM_024843]	CCCTCATTTTTTGGATAGTCACCAGACCGCAATGGAAACGTCCTAAGGAGCCAAATTCTA
A_23_P90062	0.015591107	4.6522275E-4	up	1.1579279	DNAJB1	Homo sapiens DnaJ (Hsp40) homolog, subfamily B, member 1 (DNAJB1), mRNA [NM_006145]	AGCACTGTGGAACGTCTGTAAATATGTTTTTATAATTCCATGTATAGTTGGTGTACACTC
A_19_P00800061	0.0014925922	3.471213E-6	up	4.0963383			GAGGTTAGTTATATGACCGTTTCTCTTTAGGGTTTCATTTCTCTAGCGTAATTCTTGTTT
A_23_P4522	0.011964144	2.941823E-4	down	-1.0704256	TXNL1	Homo sapiens thioredoxin-like 1 (TXNL1), transcript variant 1, mRNA [NM_004786]	ATTGCTTGATTCTCGCCAGAGACTGTCAATGTTTCATTCATTGCCATTACCAATAAATCA
A_32_P18258	0.012182763	3.061755E-4	down	-1.1813842	TALDO1	Homo sapiens transaldolase 1 (TALDO1), mRNA [NM_006755]	GATGAATCTTGCGTTTTTTACAAATCGGAGCAGGGACAGATCATAGATTTCTGATTTTAT
A_23_P9662	0.016213275	5.021783E-4	down	-1.4047636	IPP	Homo sapiens intracisternal A particle-promoted polypeptide (IPP), transcript variant 1, mRNA [NM_005897]	TTCTTAGTGACCAGATGTTGTAATGGGCTATACAGTCCAGCAGGCAGTATGCACCTAGAA
A_23_P427760	0.01267774	3.2821274E-4	down	-1.2372973	PIWIL4	Homo sapiens piwi-like RNA-mediated gene silencing 4 (PIWIL4), mRNA [NM_152431]	TCTGCCATAAGCTCAAGGCTGTGACTGGGGAAAAAGATTGAGCTTAGTTTTCATGTCTAG
A_23_P47226	0.015746647	4.7281294E-4	down	-1.2237648	YIF1A	Homo sapiens Yip1 interacting factor homolog A (S. cerevisiae) (YIF1A), mRNA [NM_020470]	AGCTCTACCTGACTCTGGGAGCTGCAGCCTTCCAGCCCCTCATCATATACTGGCTGACTT
A_23_P28815	0.0015972047	4.3126006E-6	up	2.2436233	CYP24A1	Homo sapiens cytochrome P450, family 24, subfamily A, polypeptide 1 (CYP24A1), transcript variant 1, mRNA [NM_000782]	AACAGCTAAATTTTCTGGGGCTGGGAGTAATACTGACAATCCATTTACTGTAGCTCTGCT
A_23_P93311	0.0047154357	5.1320072E-5	up	1.3699282	DDR1	Homo sapiens discoidin domain receptor tyrosine kinase 1 (DDR1), transcript variant 2, mRNA [NM_013993]	GAGAAATATAGGATAGACACTGGACATGGCCCATTGGAGCACCTGGGGCCCCACTGGACA
A_32_P20523	0.017912203	5.980266E-4	down	-1.2648808	TIGD2	Homo sapiens tigger transposable element derived 2 (TIGD2), mRNA [NM_145715]	CTTTGTGACTATCTGCAGTGAAACTTTGCTTGTTTGAAGTCCTGTGGATTCCAAAGCCAA
A_23_P32414	0.0061357548	8.930281E-5	down	-1.2105391	MST4	Homo sapiens serine/threonine protein kinase MST4 (MST4), transcript variant 1, mRNA [NM_016542]	TGTATTGCTTATTCATTATAGCTATTCGTCCTGTAATCTGTTTCTAGGTGAAGCATACTC
A_23_P250156	0.0081033	1.467694E-4	up	3.3736055	IGF2BP2	Homo sapiens insulin-like growth factor 2 mRNA binding protein 2 (IGF2BP2), transcript variant 1, mRNA [NM_006548]	AAATGTGGAGGAAAGTAGAAATTTACCAAGGTTGTTGGCCCAGGGCGTTAAATTCACAGA
A_23_P61778	0.013077395	3.4696425E-4	up	1.2298212	NXN	Homo sapiens nucleoredoxin (NXN), transcript variant 1, mRNA [NM_022463]	GGGGATCTCCAAATGCAAAAGGAAGCTTGTAGAGGTTTTTTGGGTGAGAAGAAAAATGTA
A_33_P3355371	0.01568343	4.6952305E-4	up	1.1893402	TTC9C	tetratricopeptide repeat domain 9C [Source:HGNC Symbol;Acc:28432] [ENST00000294161]	GTAGGGGGTTGATGCTTAATCAGACATACACAATATATATGTTGGTATGTCTGTTTCATA
A_23_P45999	0.0034852386	2.3835271E-5	up	1.8189956	FBXO2	Homo sapiens F-box protein 2 (FBXO2), mRNA [NM_012168]	GCCCCTGAGCAGGGAGAGAGAAGTTTTGTTGGCATAGGTTTGCTTAGGTAGCCGGCTTCT
A_19_P00808586	0.005996594	8.603876E-5	down	-2.3289506	LINC01085	Homo sapiens long intergenic non-protein coding RNA 1085 (LINC01085), long non-coding RNA [NR_033931]	GCAGTATTTGCTCTAGGGTTTTACTGTTCATTGTGTCAAGACTCACAGATTTTAGATATT
A_23_P91930	0.007386974	1.2586698E-4	up	1.2600302	QTRTD1	Homo sapiens queuine tRNA-ribosyltransferase domain containing 1 (QTRTD1), transcript variant 1, mRNA [NM_024638]	AATGCATCGTTAGGGGAGTAGTGGTAAATATTCCAGAATCCATATGAAATTCATGAGTTT
A_21_P0014031	0.009602833	1.9682977E-4	up	1.4735355	MAPT	Homo sapiens microtubule-associated protein tau (MAPT), transcript variant 6, mRNA [NM_001123066]	TCAAAATCAGTGATGGGAGTAAGAGCAAATTTCATCTTTCCAAATTGATGGGTGGGCTAG
A_21_P0007169	0.0027893065	1.4622983E-5	down	-8.728855	XLOC_009021	BROAD Institute lincRNA (XLOC_009021), lincRNA [TCONS_00019195]	GCGACCAGCAGAGCCTGCACAATAATAATGCTTCGTTTTGCAAATGTATTTTGTTCTTTT
A_23_P156289	0.0101418905	2.2184412E-4	down	-1.8055686	OSMR	Homo sapiens oncostatin M receptor (OSMR), transcript variant 1, mRNA [NM_003999]	AGACAAGGACAGTCTCCCAACAAACCCAGTAGAGGCACCACACTGTTCAGAGTATAAAAT
A_33_P3357530	8.9715177E-4	6.867878E-7	up	2.101282	SLC12A7	Homo sapiens solute carrier family 12 (potassium/chloride transporter), member 7 (SLC12A7), mRNA [NM_006598]	GGTTTCCCTGTCTGTCTGTGTTAGTAGAAAAATAAAATCCTATGAAATCTGAGTACGTTG
A_23_P202117	0.014224401	3.9752852E-4	up	1.2938808	PCGF5	Homo sapiens polycomb group ring finger 5 (PCGF5), transcript variant 3, non-coding RNA [NR_046310]	GTTGACCTCAGGATACATTAAAGCTACTTAGTGGTGACTGGTTTCTGCCTACCACTTCCT
A_19_P00322906	0.009145282	1.7934047E-4	up	1.4847428	C17orf51	Homo sapiens chromosome 17 open reading frame 51 (C17orf51), mRNA [NM_001113434]	GAGGAGGCATCCAGGACAGCACCCACGTTCCCGCCTGAGGCACATGAGGGTGGATGACAG
A_33_P3317628	0.0037125174	2.8732698E-5	up	1.4101976	PKP3	Homo sapiens plakophilin 3 (PKP3), mRNA [NM_007183]	TGTGGCCTGGCAGTATCTTGGGATAGCCAGCACTGGGAATAAAGATGGCCATGAACAGTC
A_33_P3297978	0.0044180234	4.49793E-5	up	1.8226346	MYO1E	Homo sapiens myosin IE (MYO1E), mRNA [NM_004998]	TAAAGATGTGCTCTGCTTTTTTCCAACTACGGAGTGTCACTGCTTTCTAGGTCAGTCCCT
A_21_P0011745	0.007361439	1.24788E-4	down	-1.7252531	LINC00665	Homo sapiens long intergenic non-protein coding RNA 665 (LINC00665), transcript variant 2, long non-coding RNA [NR_038279]	GCGCTGATGTAGTTTCCTGACCTCTGACCCGTATTGTCTCCAGATTAAAGGTACGACATT
A_23_P82334	0.005244312	6.52517E-5	down	-1.1456584	SLC25A13	Homo sapiens solute carrier family 25 (aspartate/glutamate carrier), member 13 (SLC25A13), transcript variant 2, mRNA [NM_014251]	ATGAAAACCACATTGGAGATGTTTAGTAATCATATTGTTACTGGTACCAAGACTACTAGG
A_23_P56654	0.005862002	8.225912E-5	down	-1.2059222	MCEE	Homo sapiens methylmalonyl CoA epimerase (MCEE), mRNA [NM_032601]	CCATCCTAAAGACTGTGGTGGAGTCCTTGTGGAACTGGAGCAAGCTTGATTTATATTTGC
A_23_P163455	0.016613431	5.2595336E-4	up	2.4178996	MAP1A	Homo sapiens microtubule-associated protein 1A (MAP1A), mRNA [NM_002373]	AATGCCAGAATTCTTCCAAACTCCCTGACTCTTTGAAGTTTTTACTCACCCCATTTCAAT
A_23_P161481	2.7860372E-4	2.901868E-8	up	1.538277	PALD1	Homo sapiens phosphatase domain containing, paladin 1 (PALD1), mRNA [NM_014431]	TTGACCCCCTTGGCTGAATTCTTTTGCAGAACTACTGTGTGTCTGTTCACTACCTTTTCA
A_23_P146456	0.005001551	5.8398706E-5	up	2.1368165	CTSV	Homo sapiens cathepsin V (CTSV), transcript variant 1, mRNA [NM_001333]	GAAGGACTTAAGGACAGCATGTCTGGGGAAATTTTATCTTGAAACTGACCAAACGCTTAT
A_24_P392151	0.015495946	4.5839846E-4	down	-1.4484181	C11orf86	Homo sapiens chromosome 11 open reading frame 86 (C11orf86), mRNA [NM_001136485]	TGAGGCGGTACCAACAGCAGGTAAGAAGAAGGTGGGAGAGCTTTGTCGCCATCTTCCCCA
A_32_P51237	0.0066274516	1.0378981E-4	down	-1.6364505	KANK4	Homo sapiens KN motif and ankyrin repeat domains 4 (KANK4), mRNA [NM_181712]	ATGCCATATGTACAGTCTTGACTATTTCTGAGTCATCTAGTGGCTCCAATTTGCTCCAGG
A_21_P0012079	0.012774088	3.3257593E-4	down	-1.2296984	MIR4435-1HG	Homo sapiens MIR4435-1 host gene (non-protein coding) (MIR4435-1HG), transcript variant 2, long non-coding RNA [NR_024373]	CAGTCTCTGTGTGTCTTAATCCCTTGTCCTTCATTAAAAGCAAAACTAAAGAAAACAGAA
A_23_P209360	0.008280163	1.5239033E-4	down	-1.5154314	KLHL29	Homo sapiens kelch-like family member 29 (KLHL29), mRNA [NM_052920]	ACACAGATGACATTGAAATTCGTTTCTCTCCTCATCTATCACACTGGAGCAAAACTGGCT
A_32_P232214	0.005627837	7.604953E-5	down	-1.7357203	TRABD2B	Homo sapiens TraB domain containing 2B (TRABD2B), mRNA [NM_001194986]	TTTCCCATAGTGCTATGGGGCTCTTTTGTAAAATACGTGTCCATATTAAAAAAGAAAAAT
A_23_P364517	0.019650148	6.9903856E-4	down	-1.0541357	SELK	Homo sapiens selenoprotein K (SELK), mRNA [NM_021237]	TCTGCAGGGAACTGGCCTGACTGACATGCAGTTCCATAAATGCAGATGTTTGTCTCATTA
A_19_P00322339	0.0039493167	3.3385117E-5	up	1.4476961	LINC00707	Homo sapiens long intergenic non-protein coding RNA 707 (LINC00707), long non-coding RNA [NR_038291]	AGCTCAGAGGAATGAGGACATTCCAACAGGGTATCAGAATTCTCTTTTGTTTATGCTAAT
A_21_P0002158	0.015328658	4.497468E-4	down	-1.7393628	XLOC_001317	BROAD Institute lincRNA (XLOC_001317), lincRNA [TCONS_00003544]	GCACTCTGTGTCTGTAGCTTCCTGTGAGTATGCAATCATTTCAAAATTAAAAGTTTGTTA
A_33_P3746549	0.016594172	5.245469E-4	down	-3.1094992	PLEKHG4B	Homo sapiens pleckstrin homology domain containing, family G (with RhoGef domain) member 4B (PLEKHG4B), mRNA [NM_052909]	TCTTATTTAAAAAACAAACCTTCCACTTCCACCCAAGACAACAGCATAGGAAACAGACCT
A_33_P3411397	0.0065189027	1.0020253E-4	down	-1.1907206	SLC25A6	Homo sapiens solute carrier family 25 (mitochondrial carrier; adenine nucleotide translocator), member 6 (SLC25A6), mRNA [NM_001636]	CTTGTAGGAGCCAAGTCGTGTTCTAAGTATTTATTTAAAACAAAAGAATCACGTTTTCCC
A_33_P3222937	0.013977395	3.8544188E-4	down	-1.2257633	TMEM214	Homo sapiens transmembrane protein 214 (TMEM214), transcript variant 1, mRNA [NM_017727]	CAGTATATGGTTCTTGGGTATGCCCTACCAGGTGGAATAAAGGACACAGATTTGATTTCT
A_23_P93431	0.014666192	4.1723222E-4	down	-1.1693512	AIG1	Homo sapiens androgen-induced 1 (AIG1), transcript variant 1, mRNA [NM_016108]	ACCTGAGAGGGAAGGGGACAGATGTTTCTCATTGCATAATGTCACAGTTGCCTCAAATGA
A_23_P58082	0.0025358961	1.1728557E-5	up	1.9481869	CCDC80	Homo sapiens coiled-coil domain containing 80 (CCDC80), transcript variant 1, mRNA [NM_199511]	CGGAGTACTTCTCCATGCTTCTAGTCGGAAAAGACGGAAATGTCAAATCCTGGTATCCTT
A_33_P3424803	0.011028411	2.5691444E-4	up	1.4382029	HLA-C	Human MHC class I HLA-Cw1 gene, complete cds. [M26429]	TAAGTCAATTCCTGGAAGTTGAGAGAGCAAATAAAGACCTGAGAACCTTCCAGAATCCGC
A_24_P247074	0.0056827203	7.710024E-5	up	2.373341			GTAGAGCTGGAGTCTCGCCTGGAAGGGCTGACTGAGATCAACTTCCTCAGGCAGCTGTAT
A_24_P399942	0.004213488	4.082007E-5	down	-1.3197474	ATP11C	Homo sapiens ATPase, class VI, type 11C (ATP11C), transcript variant 1, mRNA [NM_173694]	TGAGGATGTTACCTACTAAACTGAAAACATTCATTCCATATCTACTTACACATACACCAG
A_23_P399001	0.0104600955	2.3687203E-4	down	-1.2601459	CXXC5	Homo sapiens CXXC finger protein 5 (CXXC5), mRNA [NM_016463]	CTCGTGTGGTCTCCAGCAAGGGATTCGGGCGAAGACAAACGGATGCACCCGTCTTTAGAA
A_24_P321525	8.9715177E-4	9.4243427E-7	down	-4.885133	RERG	Homo sapiens RAS-like, estrogen-regulated, growth inhibitor (RERG), transcript variant 1, mRNA [NM_032918]	ACAGTCTACAACTGATAAAACCTTATGATTCTTTTCTCCCCCATTATGCCCCTATATATA
A_23_P212159	0.0064758924	9.840385E-5	up	1.8338412	NUP210	Homo sapiens nucleoporin 210kDa (NUP210), mRNA [NM_024923]	AGACTTCAGTCCTCTGTTTTTGTTTCATAAGCCGTTGAGACATCTGATGGACTTGGCTTA
A_24_P287233	0.0040722084	3.643711E-5	down	-1.121385	ARL6IP4	Homo sapiens ADP-ribosylation-like factor 6 interacting protein 4 (ARL6IP4), transcript variant 4, mRNA [NM_001002252]	CCTGCTTGGCACCCCCATCTGAAAGAGCAGCACTTCTCAGCTATTAAAGGCCCCCTGGAT
A_32_P157945	0.006046977	8.711918E-5	up	1.4499906	DSP	Homo sapiens desmoplakin (DSP), transcript variant 1, mRNA [NM_004415]	AACCAAGCATTTTGGAATGAGTCTCCTTTAGTTTCAGAGTGTGGATTGTATAACCCATAT
A_23_P8452	0.0124537805	3.1760958E-4	up	1.8262558	LFNG	Homo sapiens LFNG O-fucosylpeptide 3-beta-N-acetylglucosaminyltransferase (LFNG), transcript variant 1, mRNA [NM_001040167]	AAGCGAATGATAAGGGAAAAGTTCTCAGGGAATTGAAGTGTTGTTGCTATGGTGACGTCC
A_23_P115064	0.001277821	1.9391832E-6	up	2.3820252	CRABP2	Homo sapiens cellular retinoic acid binding protein 2 (CRABP2), transcript variant 1, mRNA [NM_001878]	CCCTACACCAACAAAGAGGAATGGCTGCAAGAGCCCAGATCACCCATTCCGGGTTCACTC
A_32_P131640	0.0070488374	1.1447293E-4	down	-1.2214026	SLITRK4	Homo sapiens SLIT and NTRK-like family, member 4 (SLITRK4), transcript variant 2, mRNA [NM_173078]	TACTGTGGAGTCCTGTGGGGATACTGCAAACTCTATTGCCAAAGGGATGCTTTATACACA
A_23_P18422	0.010272534	2.2877792E-4	up	1.3178499	MRPL3	Homo sapiens mitochondrial ribosomal protein L3 (MRPL3), mRNA [NM_007208]	CAGTAGAAAACCATATGGGGACTATAGTGCAACCTATTTGGGTAAAGAAACCATTTGCTA
A_33_P3243857	0.0057624667	7.8818106E-5	down	-1.1254451	ADAM10	Homo sapiens ADAM metallopeptidase domain 10 (ADAM10), mRNA [NM_001110]	CTGTTCTTCGTTGCTGCATTTTCTTCACTTGCAGGCAAACTTGGCTCTCAATAAACTTTT
A_23_P106299	0.01940091	6.821424E-4	down	-1.3325922	SERF2	Homo sapiens small EDRK-rich factor 2 (SERF2), transcript variant 3, mRNA [NM_001018108]	GCAGAAAAAGGCAAACGAGAAGAAGGAGGAACCCAAGTAGCTTTGTGGCTTCGTGTCCAA
A_23_P92012	0.0063972296	9.573885E-5	up	1.2017883	TSEN2	Homo sapiens TSEN2 tRNA splicing endonuclease subunit (TSEN2), transcript variant 1, mRNA [NM_025265]	AAGCACTTTCATACGCAGGCATCTCTTGTTACCTACATCTAAGCTGTTCCCGAAAGAGTG
A_23_P205746	0.006338683	9.39395E-5	up	3.5042372	EML1	Homo sapiens echinoderm microtubule associated protein like 1 (EML1), transcript variant 1, mRNA [NM_001008707]	GTTCTGATGCGTTAAACGGAGGTGGCAGAAATTTGTCAAGAAGGCCTTATCCATTTCGAT
A_21_P0007907	0.0061357548	8.948656E-5	up	2.600766	LINC00540	Homo sapiens long intergenic non-protein coding RNA 540 (LINC00540), long non-coding RNA [NR_103810]	CCTTCCAAATATATGTATGTTTCTTTTCTGAAGATAGACGTGTGTGTGTTTGTGTGTATC
A_33_P3290707	0.010285046	2.3028001E-4	down	-1.4054548	MME	Homo sapiens membrane metallo-endopeptidase (MME), transcript variant 2b, mRNA [NM_007289]	CTTGTCCTGCTCCTCACCATCATAGCTGTGACAATGATCGCACTCTATGCAACCTACGAT
A_19_P00805272	0.005017074	5.9344187E-5	up	1.2808505	KIAA1671	Homo sapiens KIAA1671 (KIAA1671), mRNA [NM_001145206]	AAGTTTCATATGCACAGAAGAGCAGTTGGAAATCTGGTCGACTGCAATAAAACAAGATGA
A_33_P3281710	0.0039676973	3.448856E-5	down	-1.8984355		epsin 2 [Source:HGNC Symbol;Acc:18639] [ENST00000399085]	CCTTCCAGCGTGCAGGCCAGTCCTCCTGGCATTCTTCTAATTACACCGAGCTGTGAGTTA
A_33_P3278573	0.018683668	6.480864E-4	down	-1.4542025	MAGIX	Homo sapiens MAGI family member, X-linked (MAGIX), transcript variant 1, mRNA [NM_024859]	TTCCAGCCGGCTAGCCTGCGCTTCTGGTTCTGGGAGGGGGAGGTAATAAAATGGTTCGAT
A_33_P3232504	0.0058282875	8.099521E-5	down	-1.3814807	C9orf169	Homo sapiens chromosome 9 open reading frame 169 (C9orf169), mRNA [NM_199001]	GGCTGGAGAGGGACACCCCTGATTACCTTAAGGCCCAGGCAATAAAGCAGGGTGATCTTC
A_33_P3298492	0.01568343	4.6926274E-4	up	1.1150285	PCBP2	Homo sapiens poly(rC) binding protein 2 (PCBP2), transcript variant 1, mRNA [NM_005016]	CATGGGGAGCAGCTAGAACAATGCAGATTCATCCATAATCCCTTTCTGCTGTTCACCACC
A_23_P210708	0.009373224	1.8768986E-4	down	-2.064603	SIRPA	Homo sapiens signal-regulatory protein alpha (SIRPA), transcript variant 1, mRNA [NM_001040022]	AGGGGGAAATAAGGGAATAAGGCCAAGGAAGATGTATAGCTTTAGCTTTAGCCTGGCAAC
A_23_P159839	0.005450709	7.2297975E-5	down	-1.3459176	C1GALT1C1	Homo sapiens C1GALT1-specific chaperone 1 (C1GALT1C1), transcript variant 1, mRNA [NM_152692]	TCCAAATCAGATGCATGTGATGATGTATGGGGTATACCGCCTTAGGGCATTTGGGCATAT
A_23_P384056	0.012442146	3.1674653E-4	up	1.3318449	CCDC14	Homo sapiens coiled-coil domain containing 14 (CCDC14), mRNA [NM_022757]	TAGCTCAGTATCATCTCCCTTCATGTAAGCAGCACGTTTTAACTCTTAGGAAGCTGAATG
A_23_P148297	0.01819962	6.2125275E-4	down	-1.223593	SH3BGRL	Homo sapiens SH3 domain binding glutamic acid-rich protein like (SH3BGRL), mRNA [NM_003022]	ATAAAACAGGTTGGCGATCATTTCCCAAGATTGGTTTCCCTTGAGTTTTTGCTAAAACAA
A_23_P356494	0.011366815	2.686838E-4	down	-1.4729571	SPINK5	Homo sapiens serine peptidase inhibitor, Kazal type 5 (SPINK5), transcript variant 2, mRNA [NM_006846]	ACATTTCCACCAAGTTTGAGCCCTCAAAATGTCCTGATTACAATGCTGTCTGTCCAACTG
A_23_P146497	0.013421403	3.6106774E-4	up	1.5316681	PPP1R26	Homo sapiens protein phosphatase 1, regulatory subunit 26 (PPP1R26), mRNA [NM_014811]	TCTTAGCTTAGGAAACATTTGGTTCTTACCATCACAGCCAGGTTCACAGAGGCTCTGATG
A_23_P12140	0.017930508	6.000513E-4	down	-1.1734716	RPL5	Homo sapiens ribosomal protein L5 (RPL5), mRNA [NM_000969]	ACGCTTGGTGATACAAGATAAAAATAAATACAACACACCCAAATACAGGATGATAGTTCG
A_23_P4919	0.017138144	5.5487134E-4	down	-1.1810182	KDELR1	Homo sapiens KDEL (Lys-Asp-Glu-Leu) endoplasmic reticulum protein retention receptor 1 (KDELR1), mRNA [NM_006801]	TTACCGCACGCTCTATCTCTTCAACTGGATCTGGCGCTACCATTTCGAGGGCTTCTTCGA
A_23_P92082	0.007281713	1.21268604E-4	down	-1.0647374	TKT	Homo sapiens transketolase (TKT), transcript variant 1, mRNA [NM_001064]	CACCTGGCAGTTAACCGGGTACCAAGAAGTGGGAAGCCGGCTGAGCTGCTGAAGATGTTT
A_21_P0010596	0.004686593	5.0639574E-5	up	2.792494	RNF223	ring finger protein 223 [Source:HGNC Symbol;Acc:40020] [ENST00000453464]	TGCAAGGTAACCACAGAAACTTCCAGCTACCCCTCCAACCTTGTGAATTGTACCTTTTAA
A_23_P356646	0.017919702	5.989833E-4	up	1.0750769	TEKT4P2	Homo sapiens tektin 4 pseudogene 2 (TEKT4P2), transcript variant 1, non-coding RNA [NR_038327]	TCTCCAATAAACACTCCAATCTCCACACACACATCCCCCACAGGTGCTGAGAGGGGAGGG
A_23_P10591	0.0073383	1.238019E-4	down	-1.2098999	METRNL	Homo sapiens meteorin, glial cell differentiation regulator-like (METRNL), mRNA [NM_001004431]	AGCTTCCAGCCAAGGATGCCCTGGCCGATTGGAAATGCTGTAAAATGCAAACTAAGTTAT
A_23_P53467	0.0038463078	3.107218E-5	down	-1.3918365	IKBIP	Homo sapiens IKBKB interacting protein (IKBIP), transcript variant 2, mRNA [NM_201612]	GTTTAGAACCATTAGTAAATGATTTAACACTACGCATTGGGAGATTGGTTACCGACTTAC
A_24_P450285	0.008460952	1.5758291E-4	up	1.8405614	CCDC153	Homo sapiens coiled-coil domain containing 153 (CCDC153), mRNA [NM_001145018]	GGAGGCGAAGTATGAGGAAATCTTACACGACAGTCTGGACAGGCTCTTGGCCAAGCTGAG
A_23_P140170	0.019379498	6.8090286E-4	down	-1.337748	SEC23A	Homo sapiens Sec23 homolog A (S. cerevisiae) (SEC23A), mRNA [NM_006364]	AAATGGTTTTGTTGGAGTGCATTTTAGTAAGCCTTTGCAGTAAAATGACGGTTGTAACTA
A_23_P165598	0.010133533	2.1946775E-4	down	-5.1410923	DAPL1	Homo sapiens death associated protein-like 1 (DAPL1), mRNA [NM_001017920]	AAAGCTTTCCATAGGCGTGCTGCACTTGCTTGGTAAATTAAACAGCTTTTGTATCTTCCC
A_32_P90210	0.012617474	3.2501703E-4	up	1.0884907	TAF9	Homo sapiens TAF9 RNA polymerase II, TATA box binding protein (TBP)-associated factor, 32kDa (TAF9), transcript variant 4, mRNA [NM_001015892]	GTAATTTAGCCTTGCTGCATGTAACATGTATACTTGGTCTTGAATTCATTGTACTGATAC
A_23_P40096	0.010766568	2.4826828E-4	up	1.7459093	PROC	Homo sapiens protein C (inactivator of coagulation factors Va and VIIIa) (PROC), mRNA [NM_000312]	CTTCTGGAGGGAAGTAACATTTACTGAGCACCTGTTGTATGTCACATGCCTTATGAATAG
A_23_P41327	0.00926261	1.8255405E-4	up	1.0856826	LYAR	Homo sapiens Ly1 antibody reactive (LYAR), transcript variant 1, mRNA [NM_017816]	TCAACTGGAAGGGAACTATTAAAGCAATTCTGAAACAGGCCCCAGACAATGAAATAACCA
A_23_P218058	0.004111762	3.8415044E-5	down	-1.3753545	KLRC4	Homo sapiens killer cell lectin-like receptor subfamily C, member 4 (KLRC4), mRNA [NM_013431]	AGAGTTTGCTGGCCTGTGCTTCGAAGAACTCTGATCTGCTTTCTATAGATAATGAGGAAG
A_33_P3290343	8.043037E-4	3.592637E-7	down	-3.0063665	CYP1B1	Homo sapiens cytochrome P450, family 1, subfamily B, polypeptide 1 (CYP1B1), mRNA [NM_000104]	ATTAGCGTTTAAGGTGAGCATAAATCAACTGTCCATCAGGTGAGGTGTGCTCCATACCCA
A_33_P3279847	0.010285046	2.2935384E-4	up	1.3776567	RAET1E	Homo sapiens retinoic acid early transcript 1E (RAET1E), transcript variant 1, mRNA [NM_139165]	ACAGTAATTAATCATGAAGCCAGTAAGATCAAGGAGACATGGAAGAAAGACAGAGGGCTG
A_19_P00321332	0.012389341	3.1376857E-4	up	1.3354312	NEAT1	Homo sapiens nuclear paraspeckle assembly transcript 1 (non-protein coding) (NEAT1), long non-coding RNA [NR_028272]	GTACTGGTATGTTGCTCTGTATGGTAAGAACTAATTCTGTTACGTCATGTACATAATTAC
A_33_P3342628	0.0013883632	2.4704348E-6	up	1.2758852	HES4	Homo sapiens hes family bHLH transcription factor 4 (HES4), transcript variant 2, mRNA [NM_021170]	CCCGTTCTAGGGCCGTGGCCTTTGCCGAGACTGTAGCAGAGAAAACGTATTTATTATTCC
A_23_P27066	0.013081767	3.4770952E-4	up	1.1990259	UBE2G1	Homo sapiens ubiquitin-conjugating enzyme E2G 1 (UBE2G1), mRNA [NM_003342]	GAAAATTTCCCCAAACAATAGCAAATCTGACTTTTCCCTCTTCAGTTGCCTGGTATTAAG
A_21_P0000660	0.0015465121	4.0673663E-6	down	-1.8302904	LOC100499489	Homo sapiens uncharacterized LOC100499489 (LOC100499489), long non-coding RNA [NR_036533]	TCACCCTTACCACCTTGGAATTGTACCGCCTAATAAAATCTTCGCACTTAAACTTGGAAA
A_33_P3290562	0.005963682	8.522087E-5	down	-1.5913002	GLI3	Homo sapiens GLI family zinc finger 3 (GLI3), mRNA [NM_000168]	CACAGATGAACTCTACCTTTGCTTTCAGAACCACTTAGTCCTTTTGTAACAAAGAAAAAA
A_23_P137016	0.019447552	6.841656E-4	down	-1.294929	SAT1	Homo sapiens spermidine/spermine N1-acetyltransferase 1 (SAT1), transcript variant 1, mRNA [NM_002970]	GAAATAATAGAATGAGCACCCATTCCAAAGCTTTATTACCAGTGGCGTTGTTGCATGTTT
A_23_P348264	0.010285046	2.3008045E-4	up	1.6520128	LETM2	Homo sapiens leucine zipper-EF-hand containing transmembrane protein 2 (LETM2), transcript variant 2, mRNA [NM_144652]	TTCAGACCACTTAGAAAAATATAATTGCAAAGTCCCATTTCCTCTGTACCATTGTCACCC
A_32_P79190	8.9715177E-4	9.924058E-7	up	2.4794412	ANKRD20A12P	Homo sapiens ankyrin repeat domain 20 family, member A12, pseudogene (ANKRD20A12P), non-coding RNA [NR_046228]	ACGTTACAACTGAGTTAGAAGAATATAAGGAAGCCTTTGCAGCAGCATTGAAAGCTAACA
A_33_P3396527	0.0037125174	2.8244558E-5	up	1.1963954	POLR3G	Homo sapiens polymerase (RNA) III (DNA directed) polypeptide G (32kD) (POLR3G), mRNA [NM_006467]	GAAGTGTCTTTAAAATTGCTATCATGAGCAAAACTGGTTGCTGTAATGCTTGTTTTTCTG
A_33_P3358243	0.0025603706	1.2366374E-5	up	1.7672535	KIAA1161	Homo sapiens KIAA1161 (KIAA1161), mRNA [NM_020702]	TATAAGAGGTTTCCCCTTTTGCTTAGTTCTCATTCTCTCTTGCCTGCCGCCATGTAAGAC
A_32_P191084	0.01568343	4.689358E-4	up	1.0426326	KCTD5	Homo sapiens potassium channel tetramerization domain containing 5 (KCTD5), mRNA [NM_018992]	AACCAATTCTCCAGCATTAGGACTTACCTCCTTCTTTTTGTAAGGTCTCTTGTATGTTGT
A_33_P3420816	0.014230383	3.9825664E-4	up	1.7981155	GDF1	Homo sapiens growth differentiation factor 1 (GDF1), mRNA [NM_001492]	TCTTTGACAACAGCGACAACGTGGTGCTGCGGCAGTATGAGGACATGGTGGTGGACGAGT
A_23_P421306	0.010133533	2.2052463E-4	down	-1.7512019	SYT12	Homo sapiens synaptotagmin XII (SYT12), transcript variant 1, mRNA [NM_177963]	GGGACCGGGTATGCCAACTGGAATGATTCTAGAACCAAAATAAAGTTGGGGCAGGAAGAG
A_24_P389415	0.0035578406	2.4832412E-5	up	3.5257342	PNMA2	Homo sapiens paraneoplastic Ma antigen 2 (PNMA2), mRNA [NM_007257]	AGCACCATTTAGTTATATGTGCTAGGCAAATCTCCAACACAGTTGATGTGTAGTCTTGTG
A_23_P68486	0.008165452	1.4934348E-4	down	-1.3882489	FAM210B	Homo sapiens family with sequence similarity 210, member B (FAM210B), mRNA [NM_080821]	GTTGTTGACAGTTCCTGGTTGACCCACAGCTACCCATGTCAGTTATCTCCACTAACATAT
A_23_P110531	0.007990159	1.4318922E-4	down	-2.4715557	FST	Homo sapiens follistatin (FST), transcript variant FST344, mRNA [NM_013409]	CTGTGAAGATATCCAGTGCACTGGTGGGAAAAAATGTTTATGGGATTTCAAGGTTGGGAG
A_19_P00316012	0.008451211	1.5706838E-4	up	1.396149	C17orf51	Homo sapiens chromosome 17 open reading frame 51 (C17orf51), mRNA [NM_001113434]	AGCATCAATCCAATATGGTGTGGGTACTGTATGTCAAATTTAAAAATAAAAGTGCTATAT
A_24_P118196	0.0071531287	1.1743543E-4	down	-1.7360802	GXYLT2	Homo sapiens glucoside xylosyltransferase 2 (GXYLT2), mRNA [NM_001080393]	TATGAAGCAATACGGGATTTTCCCTTTCAAGACAATCTCTTTCAATCCATGTATTACCCC
A_24_P35891	0.013528601	3.6608466E-4	up	1.2659649	ZNF219	Homo sapiens zinc finger protein 219 (ZNF219), transcript variant 1, mRNA [NM_016423]	GCGTGAGAGTTTATTTTTGTACAAGGGGTGAGGGTGGGGGGCACTGTACCCTTCTAGCCC
A_19_P00322332	0.007107877	1.16023424E-4	up	1.6709718	LOC101059954	PREDICTED: Homo sapiens uncharacterized LOC101059954 (LOC101059954), misc_RNA [XR_172435]	GTCTTAGCCACATCCTCCAGTCCATCTGGACTAGCAATAAAGCTGACATTTTAATCCCTA
A_23_P88069	8.043037E-4	4.414912E-7	down	-2.9228444	LHFP	Homo sapiens lipoma HMGIC fusion partner (LHFP), mRNA [NM_005780]	TTCCAGTCATTGGATCGTGTTTTCTTTTGTCCATTATTGTACTGTGCTGTACCACATTTA
A_32_P169406	0.007328022	1.2261752E-4	up	3.1272385	LOC400043	Homo sapiens uncharacterized LOC400043 (LOC400043), long non-coding RNA [NR_026656]	TGTATAAAATTAGCATTTCTTATCACACCAAGGCCACACCTGTTCTCTGGCCTCACAAAC
A_19_P00324399	0.018671254	6.4618385E-4	up	1.3213696		PREDICTED: Homo sapiens uncharacterized LOC101928086 (LOC101928086), transcript variant X1, misc_RNA [XR_246003]	GGAAACTTAAAGGAGTGAAGTATCTGCTTTCCAGAAAAATCGTTGTCATTCAAAGTGAAA
A_33_P3213997	0.0126157375	3.2472366E-4	down	-1.3260939	DHRS4L2	Homo sapiens dehydrogenase/reductase (SDR family) member 4 like 2 (DHRS4L2), transcript variant 3, mRNA [NM_001193636]	ATTAACAACTTGCAAATGAGGTGCAAATAAAATGCAGATGATTGCGCGGCTTTGAATCCA
A_19_P00809417	0.005769596	7.914304E-5	up	1.6695902		activating transcription factor 7 interacting protein 2 [Source:HGNC Symbol;Acc:20397] [ENST00000570163]	AATGTTCTGCTTTCCTTGCCTTATGCCTGTACTTCACCTCAGCCTTCAATTCCATTGTGT
A_23_P7791	8.9715177E-4	1.0078569E-6	down	-1.4155906	OGFRL1	Homo sapiens opioid growth factor receptor-like 1 (OGFRL1), mRNA [NM_024576]	TCCTAAAGAACAGAGATGAGGTCAATTTCAAATTTTAGCCATCTGTTTGTGATTTCTGTC
A_24_P60268	0.008855079	1.6806483E-4	up	3.6617076	LRRTM4	Homo sapiens leucine rich repeat transmembrane neuronal 4 (LRRTM4), transcript variant 2, mRNA [NM_024993]	TCCCCTTTACAGGAGTATTATGTGGACTACAAGCCTACAAACTCTGAGACCATGGATATA
A_21_P0010886	0.0039074826	3.2509543E-5	up	1.1674868	XLOC_014512	BROAD Institute lincRNA (XLOC_014512), lincRNA [TCONS_l2_00003633]	TTGGACCTTCCGGAGCTTCTCAGAAGACAGAGGGTTTTCTTTTGAGAAAAAGTACTTCAA
A_19_P00321333	0.013782756	3.7685392E-4	up	1.4099126	NEAT1	Homo sapiens nuclear paraspeckle assembly transcript 1 (non-protein coding) (NEAT1), long non-coding RNA [NR_028272]	CTGCGTCTATTGAATTGGTAAAGTAATACCAATGGCTTTTTATCATTTCCTTCTTCCCTT
A_33_P3332438	0.010384073	2.3474115E-4	down	-1.125295	GINM1	Homo sapiens glycoprotein integral membrane 1 (GINM1), mRNA [NM_138785]	TGTTTTACCTGGCAAGTTACCTGAAACTCCTCTCAGAGCAGAGCCGCCATCTTCATATAA
A_19_P00809614	0.013782756	3.7703672E-4	up	1.2328309	MALAT1	Homo sapiens metastasis associated lung adenocarcinoma transcript 1 (non-protein coding) (MALAT1), long non-coding RNA [NR_002819]	TTCATATTTACACGAGAACCTAATATAACTGCCTTGTCTTTTTCAGGTAATAGCCTGCAG
A_23_P116264	0.0048163715	5.2872914E-5	up	1.2806622	NRGN	Homo sapiens neurogranin (protein kinase C substrate, RC3) (NRGN), transcript variant 1, mRNA [NM_006176]	GTTGTTTTGGTTTCGGACGACCCTTGCTCTGACCGGAAGAGAAGTCCCTATCCCACACCT
A_23_P51231	0.0046892953	5.0830968E-5	down	-1.6297175	RUNX3	Homo sapiens runt-related transcription factor 3 (RUNX3), transcript variant 1, mRNA [NM_001031680]	GTACAGACAGCCTGGGCTGGTAAAAGTAGGTCCTTATTTACAAGGCTGCGTTAAAGTTGT
A_24_P376129	0.009418961	1.8953386E-4	up	1.5227011	DFNB31	deafness, autosomal recessive 31 [Source:HGNC Symbol;Acc:16361] [ENST00000374057]	TGTGTAGTGTATGTTATAATACAGGCTAAGCTGCCACAATAAAAGAGCTTAAATACTGTG
A_23_P65370	0.016018111	4.8838207E-4	up	1.1102349	GLRX5	Homo sapiens glutaredoxin 5 (GLRX5), mRNA [NM_016417]	CCTCTGCAAATGTGTCAGTCTCCAAAGAGAGTATCTCCCCCCAAATTTTGTGTAGCTTCT
A_21_P0005690	0.0027753708	1.4440527E-5	up	3.4212973	XLOC_006779	BROAD Institute lincRNA (XLOC_006779), lincRNA [TCONS_00014681]	TGTGGATTCTCCACTGATTTCCTGGGCCGAAGAATTTTCCTATGTTTTAGAAATATTGTG
A_33_P3265359	0.0021872197	8.531905E-6	up	2.2009273	HES6	Homo sapiens hes family bHLH transcription factor 6 (HES6), transcript variant 1, mRNA [NM_018645]	GTACATCTTGTTTGTAGCACACTTGAGTTTGTGTATTCCATTGACATCAAATGTGACAAT
A_23_P358944	0.018036911	6.1036984E-4	down	-1.1826348	PML	Homo sapiens promyelocytic leukemia (PML), transcript variant 5, mRNA [NM_033244]	GGACTGGCTATCCCAAGACCTGGCAGATGTGGCTGCTCAATAAACACTTGTTGAACCATC
A_23_P210300	0.011445004	2.7425797E-4	down	-1.1529187	ASXL2	Homo sapiens additional sex combs like 2 (Drosophila) (ASXL2), mRNA [NM_018263]	TAGGAATACTCCTAAAACAGATATTGCCAACTAGATACACTGCCTCAATCTTGACCAGAC
A_24_P42136	0.012065918	3.0032406E-4	up	1.4401499	KRT18	Homo sapiens keratin 18 (KRT18), transcript variant 1, mRNA [NM_000224]	GCTCACAGAGCTGAGACATACAGTCCAGTCTTTGGAGATCGACCTGGACTCCTTGAGAAA
A_23_P13524	0.0031768456	1.9867395E-5	down	-1.1853513	TMEM126A	Homo sapiens transmembrane protein 126A (TMEM126A), transcript variant 1, mRNA [NM_032273]	AAGCCTGTCTTTAGAAAGATGTTATTTCCTATTTTGCTCCAGACTATGTTTTCAGCATAC
A_33_P3382100	0.019379498	6.8100763E-4	down	-2.8006454	IGFN1	Homo sapiens immunoglobulin-like and fibronectin type III domain containing 1 (IGFN1), mRNA [NM_001164586]	ATGGAGGCTGTGCCCAGAGCCCCAGGAAAATGGGAGTGAGAAGATGCCTGGCGAGGTTTT
A_23_P79978	0.0039493167	3.393646E-5	up	13.180804	SLC24A3	Homo sapiens solute carrier family 24 (sodium/potassium/calcium exchanger), member 3 (SLC24A3), mRNA [NM_020689]	TTGATTCTGTTGCACATTTTGCACTGGTTTATGGCGATTGTTTTCTTGGACGGATAGTGT
A_23_P44724	0.0013081216	2.0625107E-6	down	-2.3433135	CSRP2	Homo sapiens cysteine and glycine-rich protein 2 (CSRP2), mRNA [NM_001321]	TGTACTTGGATAGGCTGGCTAACTCGTAGGAAGAGAGCACTGTATGGTATCCTTTTGCTT
A_21_P0012150	0.002822251	1.5421934E-5	up	1.6566583	APCDD1L-AS1	Homo sapiens APCDD1L antisense RNA 1 (head to head) (APCDD1L-AS1), long non-coding RNA [NR_034147]	CACGCTAGCTTAAAAAAGGAATTTATGGACCTTACTGCAGAACGTCCCAATTCTTCAGGC
A_23_P376096	0.007729161	1.3420428E-4	up	1.2294331	TICAM1	Homo sapiens toll-like receptor adaptor molecule 1 (TICAM1), mRNA [NM_182919]	ACTGAACGCAGCCTACTCAGCCTACCTCCAGAGCTACTTGTCCTACCAGGCACAGATGGA
A_23_P97932	0.0027897668	1.4900309E-5	down	-2.1898491	MSRB2	Homo sapiens methionine sulfoxide reductase B2 (MSRB2), mRNA [NM_012228]	CACGTGTTTCCTGATGGACCTGGGCCCAATGGTCAGAGGTTTTGCATCAACAGTGTGGCT
A_21_P0013662	0.01386657	3.8014937E-4	up	1.2916683	HSPB1	Homo sapiens heat shock 27kDa protein 1 (HSPB1), mRNA [NM_001540]	CCCAGAAGCTGCAAAATCCGACGAGACTGCCGCCAAGTAAAGCCTTAGCCCGGATGCCCA
A_23_P207537	4.478793E-5	2.5830866E-9	up	2.447922	DUSP14	Homo sapiens dual specificity phosphatase 14 (DUSP14), mRNA [NM_007026]	GTTTAATAAACTGGTTCTGCTCTCTTCTGAATCTCATGCCTTTGGCACCTTGGTAGGTGC
A_23_P116235	0.0015354342	3.869601E-6	up	1.9312017	MDK	Homo sapiens midkine (neurite growth-promoting factor 2) (MDK), transcript variant 1, mRNA [NM_001012334]	AAGGGATTCTGGGAAGCTTGAGCCTCCCCCAAAGCAATGTGAGTCCCAGAGCCCGCTTTT
A_23_P93988	0.00526503	6.661837E-5	up	1.5878344	ARHGEF5	Homo sapiens Rho guanine nucleotide exchange factor (GEF) 5 (ARHGEF5), mRNA [NM_005435]	TGATAGCCGTATGTTAAACAGAATCTCACCTCAGTCTCCTGGAGGGAGATGTTTAAGAGG
A_23_P408376	0.009520988	1.9290045E-4	up	1.8064098	HSPA12A	Homo sapiens heat shock 70kDa protein 12A (HSPA12A), mRNA [NM_025015]	TCTAAAATATCAGCTACTGGGGTCTCATTCACTACAAGATAAATTCAAACTTCACAGAAC
A_33_P3266928	0.0023004531	9.385163E-6	up	2.0537207	LMTK3	Homo sapiens lemur tyrosine kinase 3 (LMTK3), mRNA [NM_001080434]	CCTCTGGTTCAAACCTTCGCGTGGCATTTTCACATTATTTAAAAAAGACAAAAACAACTT
A_24_P220454	0.019504705	6.9045025E-4	down	-1.1861285	CUX1	Homo sapiens cut-like homeobox 1 (CUX1), transcript variant 1, mRNA [NM_181552]	GAGATTGCACAGTCAAAACGACTCTAAACACACTAGTTTGGATTCCTAAATATTTTCAAG
A_32_P313405	0.0040228977	3.5837318E-5	down	-1.7481964	LAMA1	Homo sapiens laminin, alpha 1 (LAMA1), mRNA [NM_005559]	GAGGAGAAGTGTATGTGTGAATTAAGAATCTCTTCAGTTCATATTTCATTTCCAACTCAG
A_19_P00316326	0.0054918407	7.309396E-5	up	1.2882864	MAP3K13	Homo sapiens mitogen-activated protein kinase kinase kinase 13 (MAP3K13), transcript variant 3, mRNA [NM_001242317]	TGGACTTCATTTAAAGAAACCCACGGACCATTAATGGACAAAAACATGAGTCAATATGTA
A_33_P3234989	0.0017875535	5.002712E-6	down	-1.5706434	IFT81	Homo sapiens intraflagellar transport 81 homolog (Chlamydomonas) (IFT81), transcript variant 1, mRNA [NM_014055]	CTGACGTTCAGCAGTTCCTACAGTTTTACTTCAGTTTATTTTTCTTCTGTAAAATGCAAG
A_33_P3402565	0.008855079	1.6800659E-4	up	1.4393046	DSP	Homo sapiens desmoplakin (DSP), transcript variant 1, mRNA [NM_004415]	ACAGGGAATTCTTCCTACTCTTATTCCTACTCATTTAGCAGTAGTTCTATTGGGCACTAG
A_24_P49260	0.018036911	6.1130227E-4	down	-2.2837408	SPTLC3	Homo sapiens serine palmitoyltransferase, long chain base subunit 3 (SPTLC3), mRNA [NM_018327]	TGGATCACAATGATAGAGTTCTTCATGAATGTTTACAAGTTGTAAGGAATACCGTTAGTG
A_23_P160689	0.019899568	7.137944E-4	down	-1.2557302	LRIF1	Homo sapiens ligand dependent nuclear receptor interacting factor 1 (LRIF1), transcript variant 1, mRNA [NM_018372]	CATCAGTCGATTGTACAACTTTAAGGAATACAGAAAAGGTTGATTCACATATGACTTGTG
A_23_P17430	0.011109818	2.5990568E-4	up	1.4120144	RBM38	Homo sapiens RNA binding motif protein 38 (RBM38), transcript variant 1, mRNA [NM_017495]	CCACCAAGAATCCAAAACCTATTTTTGACTTGGAGAGACTTGCTTTTGTTGGTTCCGCCC
A_32_P205110	0.01179287	2.8564688E-4	down	-1.5466549	FOXC1	Homo sapiens forkhead box C1 (FOXC1), mRNA [NM_001453]	CTCCCCCTTTTGTAAATAACCCAGGAAATGTAATAAATTCATTATCTTAGGGTGATCTGC
A_33_P3474859	0.0025603706	1.244596E-5	up	1.9793503	LINC00537	PREDICTED: Homo sapiens long intergenic non-protein coding RNA 537 (LINC00537), misc_RNA [XR_246700]	CTGTTAATAGCATGGTTTACTGAATATTTTAATCCCACTATTGAGACCTACTGCTCAGAA
A_23_P252306	0.014179328	3.951511E-4	up	1.379313	ID1	Homo sapiens inhibitor of DNA binding 1, dominant negative helix-loop-helix protein (ID1), transcript variant 1, mRNA [NM_002165]	GCAGACATTTTAAAAAATGGTCACGTTTGGTGCTTCTCAGATTTCTGAGGAAATTGCTTT
A_21_P0009702	0.0034484484	2.303995E-5	up	1.762288			CATACTGGAACTTGGACTTCTGTAGGCCAACCTGGGTTCCACTTGGTAGATGGGGGTCTT
A_23_P57199	0.008661027	1.6267484E-4	up	1.5110705	GGTLC1	Homo sapiens gamma-glutamyltransferase light chain 1 (GGTLC1), transcript variant A, mRNA [NM_178311]	GACGAGGAAGAGGACTTTGGGGGACAGGCTTCTCCTGTGAGCAGCAGAGCAGCACAATAA
A_23_P30126	0.0015354342	3.9024176E-6	up	1.7691447	FGFBP1	Homo sapiens fibroblast growth factor binding protein 1 (FGFBP1), mRNA [NM_005130]	GGAATTTGCCTTATTTTTCTTGGATGCGATGTTCAGAGGCTGTTTCCTGCAGCATGTATT
A_23_P83028	0.005863252	8.2598795E-5	down	-1.7892461	RECK	Homo sapiens reversion-inducing-cysteine-rich protein with kazal motifs (RECK), mRNA [NM_021111]	CACTTAAAGCTTTCAGAATATGTCAGTGCTGATGTAGCATGCTTGTTGCAATTGCCTTTT
A_23_P76749	0.0026200688	1.2857903E-5	up	4.485669	GALNT16	Homo sapiens UDP-N-acetyl-alpha-D-galactosamine:polypeptide N-acetylgalactosaminyltransferase 16 (GALNT16), transcript variant 2, mRNA [NM_020692]	CCTGTTCTGTTTTTGCTTTTCCTCTTCTTGACCAAAGCATGTGCCACTAGCTGTCCTTGA
A_23_P124642	0.0033736592	2.2210515E-5	up	5.566888	RASGRP1	Homo sapiens RAS guanyl releasing protein 1 (calcium and DAG-regulated) (RASGRP1), transcript variant 1, mRNA [NM_005739]	ATTAACAGCAGGGTCACTTCTCATTTTCTTTGCTGACTTACCTTTTTACTGACCGTTGTG
A_21_P0000750	0.013554487	3.6705958E-4	up	1.198366	MFI2-AS1	Homo sapiens MFI2 antisense RNA 1 (MFI2-AS1), long non-coding RNA [NR_038285]	CAGCCCTAAAAGAGCTACTAAAAAGACCAGAAGTAGTATGAGAACTTATGAATACGAATA
A_23_P21363	0.0014145512	2.9272921E-6	down	-2.160347	AHNAK	Homo sapiens AHNAK nucleoprotein (AHNAK), transcript variant 2, mRNA [NM_024060]	GTGCATTTCTTTACTTGCAAGGGGACAGAGTGTGGGCTTAGGTTTGGGACTAGAGGGGGC
A_23_P69249	0.0028768918	1.6567205E-5	up	1.2986912	ACTL6A	Homo sapiens actin-like 6A (ACTL6A), transcript variant 3, mRNA [NM_178042]	TGAGAAAGAGTTCCCAAGCTTCTACCTTCCTTTTGTCACCTTACGTTTCATAGCTTTAGT
A_23_P74112	0.005001551	5.818458E-5	up	2.306714	IFNLR1	Homo sapiens interferon, lambda receptor 1 (IFNLR1), transcript variant 1, mRNA [NM_170743]	GGTGAAAGCAACATGTATCCCTTTAGACTACTAACGGTATATGTTGTTCTTATGTATTTG
A_23_P28434	0.005247154	6.581547E-5	up	1.5432075	VAMP8	Homo sapiens vesicle-associated membrane protein 8 (VAMP8), mRNA [NM_003761]	AGAGATGGACTGTGGCTGCATTTCTTGGGTCCTTAGAGTGGGCTGGAGAGACCTAGAGGG
A_23_P151075	0.0024237537	1.0843574E-5	up	2.380697	ARHGDIB	Homo sapiens Rho GDP dissociation inhibitor (GDI) beta (ARHGDIB), mRNA [NM_001175]	TCAGGTTCCAGTAGTTCATTCTAATGCCTAGATTCTTTTGTGGTTGTTGCTGGCCCAATG
A_21_P0010741	0.0037726942	2.9593257E-5	up	1.2548324			CAAAAGGCATATACCAAGCTGTCAGAAGCAGCTTCATTTAAAAGGGATTATAATACCTAC
A_32_P180958	0.004814763	5.276037E-5	down	-1.1699055	PCYOX1	Homo sapiens prenylcysteine oxidase 1 (PCYOX1), mRNA [NM_016297]	TGGTGTGTAGTCCATTCTGTACAGTTTAAAAGTGATTCACGATTTGCAGGCTTTTTATCA
A_24_P410797	0.019758075	7.0482504E-4	up	1.4326783	KALRN	Homo sapiens cDNA FLJ43991 fis, clone TESTI4019843, highly similar to Rattus norvegicus huntingtin-associated protein interacting protein (duo) (Hapip). [AK125979]	GTTGCAAGACCCTTCCGAACACATTCCTGTATAAAGTATTTTGCACTATTTAAAGAAACC
A_23_P35444	0.0026474795	1.3253312E-5	down	-5.168628	INA	Homo sapiens internexin neuronal intermediate filament protein, alpha (INA), mRNA [NM_032727]	AGTTCAAGGAACTTGAAAAATACTTTTCCTTACCTTTACCCCATCCCTGTCTTTACTCCT
A_23_P20732	0.016029868	4.89596E-4	up	1.1441641	GTF3C4	Homo sapiens general transcription factor IIIC, polypeptide 4, 90kDa (GTF3C4), mRNA [NM_012204]	TTCGGGCTCCAGAACTTAAATTGCTTGGTCCGTGGCATCTGATGTACCAACAGAGATTAA
A_23_P59005	0.005389344	7.0306414E-5	up	2.19036	TAP1	Homo sapiens transporter 1, ATP-binding cassette, sub-family B (MDR/TAP) (TAP1), mRNA [NM_000593]	TCCAGGATGAGTTACTTGAAATTTGCCTTGAGTGTGTTACCTCCTTTCCAAGCTCCTCGT
A_23_P53288	0.010074325	2.1582592E-4	down	-1.2147678	CNPY2	Homo sapiens canopy FGF signaling regulator 2 (CNPY2), transcript variant 1, mRNA [NM_014255]	ACTGGCTTGATGGATCACCCCCAGGAGGGGAAAATGGTGGCAATGCCTTTTATATATTAT
A_33_P3316323	0.015210248	4.4156754E-4	down	-1.3641956	RBMS1	Homo sapiens RNA binding motif, single stranded interacting protein 1 (RBMS1), transcript variant 1, mRNA [NM_016836]	GCATAAAACCCTTAAATTCATCTAGTAGCTGTTCCCCCGAACAGGTTTATTTTAGTAAAA
A_23_P23584	0.0035681324	2.5316378E-5	down	-1.325885	CTNNBIP1	Homo sapiens catenin, beta interacting protein 1 (CTNNBIP1), transcript variant 1, mRNA [NM_020248]	CGGCCTGTCTCATCTTCTGAAGAGGAAAAGTCAAAGTGTTGCTGTGGCTCCATATTTCAA
A_19_P00316110	0.018147191	6.176747E-4	down	-1.3031354	LINC00313	long intergenic non-protein coding RNA 313 [Source:HGNC Symbol;Acc:16416] [ENST00000427188]	AACCTTTGAGGTGTGAGGGCCTTGATCTGGGGTGCAGCCTCCAGCTTTCTGCTTACAGAG
A_21_P0009267	0.0058541866	8.177232E-5	down	-2.030725		PREDICTED: Homo sapiens uncharacterized LOC101928104 (LOC101928104), misc_RNA [XR_243746]	AGACTTCCTTGTTCGTGTCTATATGGTTCATACATGGCCTTCCCCTTAATTAAAGATGTC
A_33_P3383936	0.009878171	2.0782267E-4	up	1.1800243	DHX30	Homo sapiens DEAH (Asp-Glu-Ala-His) box helicase 30 (DHX30), transcript variant 2, mRNA [NM_014966]	TCATGCAGTTCCATACTGTGGGCACCAAGACCAAGCTGTCTACACTCACCCTGCTCTGGC
A_23_P53176	0.015820367	4.7580522E-4	down	-2.1368496	FOLR1	Homo sapiens folate receptor 1 (adult) (FOLR1), transcript variant 1, mRNA [NM_016725]	CCACAGCTCCCAACTATTTGGTTCCTGCTCCATGGTCGGGCCTCTGACAGCCACTTTGAA
A_23_P39955	0.0049662916	5.721407E-5	up	1.7559917	ACTG2	Homo sapiens actin, gamma 2, smooth muscle, enteric (ACTG2), transcript variant 1, mRNA [NM_001615]	TAAAGTCAGAACAGGTTCTCCAAGGATCCCCTCGAGACTACTCTGTTACCAGTCATGAAA
A_33_P3392250	0.009994138	2.1312319E-4	up	1.3436506	FAM178A	Homo sapiens family with sequence similarity 178, member A (FAM178A), transcript variant 3, mRNA [NM_001243770]	GAGATGGGGAGTTTCATCTAATGACATCCTCTGACAATAAAACATGTTTAAATTCCCTAA
A_33_P3413083	0.0053402213	6.811636E-5	down	-1.238608	RHEB	Homo sapiens Ras homolog enriched in brain (RHEB), mRNA [NM_005614]	CTTTTGCAGCTAAAATTTCACAGGGCTATTTCTAATACGTAAGCAAATGTTACCATTGAC
A_23_P124514	0.011853677	2.8922234E-4	down	-2.0274239	DLG2	Homo sapiens discs, large homolog 2 (Drosophila) (DLG2), transcript variant 2, mRNA [NM_001364]	CTGGAATCTCTTATGGAGATGAATAAGCGTCTAACAGAGGAACAAGCCAAGAAAACCTAT
A_23_P35645	0.004162429	3.987109E-5	down	-1.1492914	RBM17	Homo sapiens RNA binding motif protein 17 (RBM17), transcript variant 1, mRNA [NM_032905]	CAGCTGAAAGACTCGAGCCCGTGCTGTCTCCTTTGGTTATTATGACATGAAAGTGTATCA
A_33_P3346533	0.006889057	1.1054802E-4	up	1.2348258			ACACTGGGTCCCGGTTACCGTCCCCAACAAGCTAAGAGTTGAGGTAAGTAACACACTGGG
A_23_P19164	0.008165452	1.4907251E-4	up	1.1924211	TTC1	Homo sapiens tetratricopeptide repeat domain 1 (TTC1), transcript variant 1, mRNA [NM_003314]	GGAGAGCAGAGTTGTATGAGAAGACGGACAAGCTAGATGAAGCCCTGGAAGACTATAAAT
A_23_P80832	0.0041612405	3.9612118E-5	up	1.378934	TMEM41A	Homo sapiens transmembrane protein 41A (TMEM41A), mRNA [NM_080652]	CTGCTAATCATATACACAGTAGAAAAGACACATGATCTGGATTTTCTGTTTGCCACATCC
A_23_P43557	0.011366815	2.6978622E-4	up	1.2746543	DENND1A	Homo sapiens DENN/MADD domain containing 1A (DENND1A), transcript variant 2, mRNA [NM_024820]	GAAGTGGAGCAATTCTGAATACTGTAAAGACCAAAGCAAATCCGGCCATGAAGACTGTCT
A_23_P204980	0.004561502	4.772271E-5	down	-1.2442667	UGGT2	Homo sapiens UDP-glucose glycoprotein glucosyltransferase 2 (UGGT2), mRNA [NM_020121]	AAGTCTGGAGCCCCTGCTGAGACGATTTGGAAGTCTCGTTAAGATCAGTGACATATTCTT
A_24_P64653	0.013325962	3.5550844E-4	up	3.3332183	METTL7B	Homo sapiens methyltransferase like 7B (METTL7B), mRNA [NM_152637]	ATGGAAGCTGGGCCTTCATGTGGCAGCAAGTTTTCGAGCCCACCTGGAAACACATTGGGG
A_24_P316019	0.0063972296	9.577135E-5	up	1.9788524	LOC101059918	Homo sapiens golgin subfamily A member 8R-like (LOC101059918), mRNA [NM_001282484]	AGAAGCTTCGGCAGCTGGCCAAGCCACAGAGCGTCTTCGAGGAGCTGAACAATGAGAACA
A_33_P3281795	9.9959E-4	1.3002413E-6	up	3.688836	MGLL	Homo sapiens monoglyceride lipase (MGLL), transcript variant 1, mRNA [NM_007283]	TTTAGAGCTAAAGGAATCAGTGTACACTACAGCTAATCCTAATAAATCCGATGTTTTCGG
A_23_P163458	0.007328022	1.2250457E-4	up	1.4983771	EHD4	Homo sapiens EH-domain containing 4 (EHD4), mRNA [NM_139265]	TGGCCCTCAAACATTAAATATCCCCAGGTCTCCTTGGTGGGTGGCAGGATTTAAATTCAA
A_33_P3262694	0.012532798	3.216008E-4	up	1.2198081		Q5JX79_HUMAN (Q5JX79) OTTHUMP00000030115 (Fragment), partial (27%) [THC2659533]	GTTTTTAAGTGACTGATTGGGATAGAACCCTAAAGAAATAAAACTTCCAGTGGATACGAA
A_23_P314145	0.017954074	6.033225E-4	down	-1.2357054	UST	Homo sapiens uronyl-2-sulfotransferase (UST), mRNA [NM_005715]	GGTACTTTTACCTGTGTGTTCAAAGGCATTTCTTTTCAGCAGTGATCATTATAACTTCAC
A_23_P9823	0.0058541866	8.191869E-5	up	1.6743629	MLXIP	Homo sapiens MLX interacting protein (MLXIP), mRNA [NM_014938]	TCTTGTTCTAGAGGTTTTCTTGTTTTCGAATCTTGCCTGATGAATCCAGCCAGACCAAGG
A_23_P143143	4.7303017E-4	8.390531E-8	up	1.6584971	ID2	Homo sapiens inhibitor of DNA binding 2, dominant negative helix-loop-helix protein (ID2), mRNA [NM_002166]	AGGCTTCTGAATTCCCTTCTGAGTTAATGTCAAATGACAGCAAAGCACTGTGTGGCTGAA
A_23_P74799	0.0039074826	3.2388194E-5	down	-1.1769762	SLC25A24	Homo sapiens solute carrier family 25 (mitochondrial carrier; phosphate carrier), member 24 (SLC25A24), transcript variant 2, mRNA [NM_213651]	GATTCTGTATCTTTTGGAAAAAAGCCGAGAGTTGAAGATAGTATATTTCTGGTAGTACTG
A_23_P119562	0.016632238	5.276248E-4	up	1.0880629	CFD	Homo sapiens complement factor D (adipsin) (CFD), mRNA [NM_001928]	GGCCTGAAGGTCAGGGTCACCCAAGCAACAAAGTCCCGAGCAATGAAGTCATCCACTCCT
A_23_P69908	0.0033736592	2.1987164E-5	down	-1.4072676	GLRX	Homo sapiens glutaredoxin (thioltransferase) (GLRX), transcript variant 1, mRNA [NM_002064]	CTGATAAAACTTACAGCCCCCTACACCAAGAGTGTATCTGTGAAAGAGCTCCTACACTTT
A_32_P107876	0.013077395	3.470688E-4	down	-1.3229364	FRAS1	Homo sapiens Fraser syndrome 1 (FRAS1), transcript variant 1, mRNA [NM_025074]	CACACCTGCTCAGACTGAGTAAACATTTGTGGTGCTGTCAACCTGATTTCTTGACTCTCA
A_33_P3242883	0.010554387	2.4067139E-4	down	-1.3579097	DLX6	Homo sapiens distal-less homeobox 6 (DLX6), mRNA [NM_005222]	GTGAATTGGTGGCATTCACAAAGCTAATAGGGACGTTTATATCAAGAAACATTTCTGTAT
A_19_P00810806	0.013683686	3.7266413E-4	down	-1.2083075	SMIM2-AS1	Homo sapiens SMIM2 antisense RNA 1 (SMIM2-AS1), transcript variant 1, long non-coding RNA [NR_104064]	ATGAAGAACAAGCCATTTTGACCTCCATCCTGGCTCATCTCCTCTGTGTTCTCATAGCAT
A_23_P320261	0.0027523683	1.4266598E-5	up	38.536385	DMKN	Homo sapiens dermokine (DMKN), transcript variant 1, mRNA [NM_001035516]	AGTTCTCCAGGAAGGAGGAGCTTCCTACTTTTGAGTTTCTCTGTGGAAATAAAACATGAA
A_23_P202978	0.0013883632	2.4658805E-6	down	-4.2458553	CASP1	Homo sapiens caspase 1, apoptosis-related cysteine peptidase (CASP1), transcript variant alpha, mRNA [NM_033292]	CTGTTCCTGTGATGTGGAGGAAATTTTCCGCAAGGTTCGATTTTCATTTGAGCAGCCAGA
A_23_P258136	0.0036749241	2.708807E-5	up	1.8408009	MXRA5	Homo sapiens matrix-remodelling associated 5 (MXRA5), mRNA [NM_015419]	GACTTTGTTCCAGATTGACAAGTCATCTTTCAGTTATTTCCTCTGTCACTTCAAAACTCC
A_23_P259328	0.012315131	3.1116098E-4	down	-1.133246	PEX3	Homo sapiens peroxisomal biogenesis factor 3 (PEX3), mRNA [NM_003630]	TTAATACTGAGGAAAAATCTGTTGGAGACATAGGTCTAGGATGTGTGAAGTTTGGAAAAA
A_23_P139958	0.016197504	4.997048E-4	up	1.162191	CDK8	Homo sapiens cyclin-dependent kinase 8 (CDK8), mRNA [NM_001260]	GCTAGCACAGTTTGTGTTGTGGATTTGCTACTTCCATAGTTTACTTGACATGGTTCAGAC
A_23_P160354	0.017858058	5.9481105E-4	up	4.452724	AKT3	Homo sapiens v-akt murine thymoma viral oncogene homolog 3 (AKT3), transcript variant 2, mRNA [NM_181690]	CTAGGGGTTGTCATGTATGAAATGATGTGTGGGAGGTTACCTTTCTACAACCAGGACCAT
A_32_P229618	0.0014632412	3.1252227E-6	down	-2.0717347	DLG2	Homo sapiens discs, large homolog 2 (Drosophila) (DLG2), transcript variant 2, mRNA [NM_001364]	CTTCTCTCCTTTTTGAGTTTGTGTTTCCTAAGTGTTTCTTAACTTCTGAGTGCACCAGGC
A_21_P0011015	0.009551806	1.940896E-4	down	-1.6747786	XLOC_014512	BROAD Institute lincRNA (XLOC_014512), lincRNA [TCONS_l2_00005178]	GACTTCATTGTTTTCTGCTCTTCAACCTCATATAACGTGTCCAGGAGAGACAGCACAAGG
A_23_P208293	0.013012119	3.4441505E-4	up	1.2442693	PVRL2	Homo sapiens poliovirus receptor-related 2 (herpesvirus entry mediator B) (PVRL2), transcript variant delta, mRNA [NM_001042724]	TACTGTTAACCTGGAAGACTACTGAATCATTTTACCCTTGCCCAGTGGAATAGGACCTAA
A_23_P251795	0.016066002	4.920587E-4	up	1.2302153	GPC2	Homo sapiens glypican 2 (GPC2), mRNA [NM_152742]	TGCTTGAGTAGGATGTGAGACTTCATGGGCCTGGGTCCTGTTGAGTTTTTTCAGTATCAA
A_33_P3265290	0.017429387	5.699098E-4	up	1.172469	RPL24	Homo sapiens ribosomal protein L24 (RPL24), mRNA [NM_000986]	TGCTAAGGAAGCAAAAAAGGCTAAGCAAGCATCTAAAAAGACTGCAATGGCTGCTGCTAA
A_33_P3702364	0.013402641	3.5924223E-4	up	1.177734	SNX24	Homo sapiens sorting nexin 24 (SNX24), mRNA [NM_014035]	CTTTGTTTGAAGACCAAGTGAAGTTGTTGGTGTTTGTTTAGGGGCCATTTTGTTAAAAAA
A_23_P71037	0.001382983	2.3440853E-6	down	-2.0315533	IL6	Homo sapiens interleukin 6 (interferon, beta 2) (IL6), mRNA [NM_000600]	ATTGTTGTTGTTAATGGGCATTCCTTCTTCTGGTCAGAAACCTGTCCACTGGGCACAGAA
A_23_P392384	8.903381E-4	6.492542E-7	up	3.42568	AIF1L	Homo sapiens allograft inflammatory factor 1-like (AIF1L), transcript variant 3, mRNA [NM_001185095]	TCAACCATCTTCTTTCTGAAAGACCAAATCTAATGTAACCAGTAACGTGAGGACTGCCAA
A_33_P3242623	0.016438529	5.148076E-4	down	-1.2643262	SLC7A11	Homo sapiens solute carrier family 7 (anionic amino acid transporter light chain, xc- system), member 11 (SLC7A11), mRNA [NM_014331]	GAAGTAAGTGTGTTTGTTTTCATCTTATGGAAACTCTTGATGCATGTGCTTTTGTATGGA
A_21_P0011696	0.010778479	2.4890222E-4	down	-2.4276004	LINC00665	Homo sapiens long intergenic non-protein coding RNA 665 (LINC00665), transcript variant 2, long non-coding RNA [NR_038279]	TTTGGTTCCCAGTGAGCATTGTACATTTGTGGATATTAAATCTTTGGCAAAGTCATTTAC
A_23_P500501	0.00644371	9.753383E-5	up	1.7937752	FGFR3	Homo sapiens fibroblast growth factor receptor 3 (FGFR3), transcript variant 1, mRNA [NM_000142]	TGCTACCTTTCAAAGCTTGGAGGGAAGCCGTGAATTCAGTTGGTTCGTTCTGTACTGTTA
A_23_P202408	0.0049071717	5.5760844E-5	up	1.4633026	HERC4	Homo sapiens HECT and RLD domain containing E3 ubiquitin protein ligase 4 (HERC4), transcript variant 3, mRNA [NM_001278185]	TGGATCCTAAATACGGCATGTTTAGGTATTATGAAGATTCCAGGCTCATTTGGTTTTCTG
A_24_P358591	0.0041145575	3.8781982E-5	up	1.704336	C2orf70	Homo sapiens chromosome 2 open reading frame 70 (C2orf70), mRNA [NM_001105519]	CAAAGAAGAAGTGGCACCTTTTAAGACTAGCCCCCGAGAACCTGAAGACCTACCAGACCT
A_33_P3243439	0.006338683	9.3604336E-5	up	2.1384726	GPR162	Homo sapiens G protein-coupled receptor 162 (GPR162), transcript variant A-2, mRNA [NM_019858]	TGCCCTACTCAGCTTCCATCACCCCTAGCAATATGTATTAAAGTCTGAAGTGTTGCCATG
A_21_P0002700	0.0053402213	6.83065E-5	up	1.6007953	LOC253573	Homo sapiens uncharacterized LOC253573 (LOC253573), long non-coding RNA [NR_033844]	AGAACTGTAATGAGATAGCACAATGCAGGCAAAAAGCCAGTGTTAACGGAGCAAGAAACT
A_24_P937405	0.0026660296	1.3451262E-5	down	-1.7807165	PRSS23	Homo sapiens protease, serine, 23 (PRSS23), mRNA [NM_007173]	CAAAGTGTGCTCCTTAAACACTCATGCCTTATGATTTTCTACCAAAAGTAAAAAGGGTTG
A_33_P3403117	0.0022764448	9.152619E-6	down	-1.5860788	NR2F1	Homo sapiens nuclear receptor subfamily 2, group F, member 1 (NR2F1), mRNA [NM_005654]	AGCTACAAAGCATGGGAAAAAGAGACTCTTTTAGGATCAGATCTGTGAGCACGTTGGCGA
A_33_P3812669	0.017091513	5.517414E-4	down	-1.3360431	GABARAPL1	Homo sapiens GABA(A) receptor-associated protein like 1 (GABARAPL1), mRNA [NM_031412]	AGACATGACATTTCAATTCATCTCTGCAAATGAAAAGGGTTCTTCCTCTTGGGGGAAATC
A_23_P148785	0.016213275	5.018104E-4	down	-1.2013574	SFT2D2	Homo sapiens SFT2 domain containing 2 (SFT2D2), mRNA [NM_199344]	AAGGGACTTGCACTTATCTTCTGCATTTTGCAGTCTTTGGCATTGACGTGGTACAGCCTT
A_23_P121447	0.010228343	2.2658423E-4	up	1.6853602	ACTRT3	Homo sapiens actin-related protein T3 (ACTRT3), mRNA [NM_032487]	CTCCAGAAAGGAAAATATCAGTGTGGATGGGAGGTTCTATTCTTGCATCCTTGTCTGCCT
A_21_P0011831	0.0038062758	3.01786E-5	down	-1.7063607	XLOC_014512	BROAD Institute lincRNA (XLOC_014512), lincRNA [TCONS_l2_00013854]	TACAAAGGCTGTGTGTGGATGGTGACGCTGAGGTTTTATCTTCAAGTGAGTTGTGCATAT
A_23_P30275	0.008460952	1.5752469E-4	up	1.4990088	PCYOX1L	Homo sapiens prenylcysteine oxidase 1 like (PCYOX1L), mRNA [NM_024028]	ATATCTTACCCCTAGATGTTCATCCCAGCAGAAGAAAGAAGAAGGTGTTGGGGTAGGATT
A_19_P00811234	0.011501692	2.7632713E-4	down	-1.3520885			CTACAGGTTTAAGGGCTTAAATCTCAACCTTTGTGTTAGGAGTAACAGGAGTGTGCTGAG
A_24_P314477	0.017245319	5.6058797E-4	up	10.597812	TUBB2B	Homo sapiens tubulin, beta 2B class IIb (TUBB2B), mRNA [NM_178012]	TTGATGACATCAATGTAACATTTGAGATATTTCTGAATTACTGTTGTAATGGCTAAAATC
A_24_P405205	0.017952973	6.0151075E-4	up	1.3632424	ATP2B4	Homo sapiens ATPase, Ca++ transporting, plasma membrane 4 (ATP2B4), transcript variant 1, mRNA [NM_001001396]	AAATGCTATAAACTGCAAATCTGAAATTCAAATGTGTTGTTCCACTGAGACCAGAAGAAG
A_33_P3214343	0.0070227194	1.1345437E-4	up	3.831349		Q1W9F5_9CHON (Q1W9F5) NADH dehydrogenase subunit 2, partial (5%) [THC2601170]	GGCAGGCATTTTTTCCTTTGTTTGGATGAACATTTTGTTATTGGTCCACTTCTAATTTTG
A_21_P0014572	0.016071413	4.925412E-4	up	1.2713681	XLOC_009738	BROAD Institute lincRNA (XLOC_009738), lincRNA [TCONS_00020412]	TCAATCTCTTGAAATGGGAATAAAACCATCTGCCTTGTCTTTCTTACAGGGTTTTCAGAA
A_23_P61050	0.017556852	5.760411E-4	up	1.5551895	MLKL	Homo sapiens mixed lineage kinase domain-like (MLKL), transcript variant 1, mRNA [NM_152649]	GAAGTGACTGTATGCCAGTTCCAAGCCTAGGTTTCAAGAGGCCTTATAAATGTCTGTTGG
A_33_P3262191	0.010642737	2.4335807E-4	up	1.6904222	CPNE7	Homo sapiens copine VII (CPNE7), transcript variant 2, mRNA [NM_014427]	CTGGCCTGTGGGTTCTGCCGGTGGGGCTTCAGGAGTAATAAAGTGTCACCCTATCCTTGT
A_19_P00806771	0.018399285	6.338704E-4	up	1.9263437	LINC00659	Homo sapiens long intergenic non-protein coding RNA 659 (LINC00659), transcript variant 1, long non-coding RNA [NR_046224]	GGGATTAGCGGAGATCCACTCTTTCATATTTAAATCTTCACAAGAGAATGAATCACTTTT
A_23_P91491	0.017201846	5.58037E-4	up	1.2293365	C21orf59	Homo sapiens chromosome 21 open reading frame 59 (C21orf59), transcript variant 1, mRNA [NM_021254]	TTTCATGGAGTGAAAGACATAAAGTGGAGACCAAGATGAAGTTCACCAGCTGATGACACT
A_33_P3384260	0.0040157614	3.566036E-5	up	1.307076	HNRNPA1	heterogeneous nuclear ribonucleoprotein A1 [Source:HGNC Symbol;Acc:5031] [ENST00000546500]	GCCATGCAGTTTACATGAGCTGTTCTGCAGCTCAAATTCCATTTTGTGAATGGGTTTTTT
A_23_P371824	0.009373809	1.8796553E-4	up	1.9458677	TUFT1	Homo sapiens tuftelin 1 (TUFT1), transcript variant 1, mRNA [NM_020127]	TTTCTGTGTCTCAAGACTGGGCTCACATTCTGGCTTTGTCCATAACAATGCTCTGGGATT
A_24_P192301	0.019784823	7.0757914E-4	down	-1.4651055	SEMA3A	Homo sapiens sema domain, immunoglobulin domain (Ig), short basic domain, secreted, (semaphorin) 3A (SEMA3A), mRNA [NM_006080]	CAGCTTTAAATAGACTTTGTCATATGCATGAATCATCAGAGATGAAACTGTTTGAGAGAC
A_24_P418408	0.016291669	5.059439E-4	up	1.453847	FAM89A	Homo sapiens family with sequence similarity 89, member A (FAM89A), mRNA [NM_198552]	CTGCATTACTAACTGCCCAGTGATTCGGTGAAAGCTTTTTACTGAAAAAGTTAACATTTC
A_24_P317874	0.007595936	1.308431E-4	down	-1.2050077	KIN	Homo sapiens KIN, antigenic determinant of recA protein homolog (mouse) (KIN), transcript variant 1, mRNA [NM_012311]	GAAGACTTTTTCAGCTACTATCGTCATTGAAACTGGCCCTTTAAAAGGACGCAGAGTTGA
A_23_P415706	0.008619107	1.6154452E-4	down	-2.0175385	GPR133	Homo sapiens G protein-coupled receptor 133 (GPR133), mRNA [NM_198827]	GAACTATCTTTAGTTTAGATGGAATTATTTGTTTTTAATTGTTGCCGTATTCATCTATAT
A_23_P167389	0.0048509357	5.3443564E-5	up	1.6338956	ARAP3	Homo sapiens ArfGAP with RhoGAP domain, ankyrin repeat and PH domain 3 (ARAP3), mRNA [NM_022481]	ATATTTGATACGTAGGGGTTCCATGAGAGATTTTGGGTTTTAAAGGAATGGTTTTACTGC
A_24_P941912	0.009871443	2.0719932E-4	up	2.232373	DTX3L	Homo sapiens deltex 3-like (Drosophila) (DTX3L), mRNA [NM_138287]	TTTATAATAACCGTAGCCCACATTGTAGTAGTTTTTCAGCTCTTTACTAAGTCCCACCAA
A_23_P92154	0.004098543	3.7119247E-5	up	1.419054	MBD4	Homo sapiens methyl-CpG binding domain protein 4 (MBD4), transcript variant 1, mRNA [NM_003925]	TCATGACTGGCTTTGGGAAAATCATGAAAAATTAAGTCTATCTTAAACTCTGCAGCTTTC
A_33_P3419998	0.002060766	7.054333E-6	up	13.283778	SLC4A8	Homo sapiens solute carrier family 4, sodium bicarbonate cotransporter, member 8 (SLC4A8), transcript variant 1, mRNA [NM_001039960]	GCCTATTGGCTGAACATTATGCTACTTTCAGATATTAAAATGGTGTTCCTTTGAATCGTG
A_23_P36753	0.0045382963	4.6421406E-5	down	-1.3825295	ALDH2	Homo sapiens aldehyde dehydrogenase 2 family (mitochondrial) (ALDH2), transcript variant 1, mRNA [NM_000690]	AAATGATCCTTGCGTGCTGAATATCTGAAAAGAGAAATTTTTCCTACAAAATCTCTTGGG
A_33_P3324186	0.0030000652	1.8146578E-5	up	2.4526992	LOC642366	Homo sapiens uncharacterized LOC642366 (LOC642366), long non-coding RNA [NR_046243]	TTATATCCATGTTCCAATCCTCTGGGCTTTCCTCGAAATGAATAAAATTGTGGAAATGAA
A_21_P0014344	0.019999495	7.198605E-4	up	2.6539912		Q9HBV3_HUMAN (Q9HBV3) PP3111, partial (17%) [THC2527306]	CGTGATTAGCCTTCTTCAGCATATGTAAAATGATGTCTGCTTTTCTTCTCTATTTGTCAT
A_19_P00321511	0.010186542	2.2395446E-4	up	1.0566231	SNHG5	Homo sapiens small nucleolar RNA host gene 5 (non-protein coding) (SNHG5), long non-coding RNA [NR_003038]	CGAGTAGCCAGTGAAGATAATGAATGTCGAATGTGACTGACTAGCAGCTTCATTTTGAAG
A_23_P139500	0.014398391	4.0551255E-4	up	2.016444	BHLHE41	Homo sapiens basic helix-loop-helix family, member e41 (BHLHE41), mRNA [NM_030762]	ACAACAGTCTGACTATGAGTGAGGAAAATATCTGGGTCTTTTCGTCAGTTTGGTGCATTT
A_33_P3243887	0.012974241	3.4264536E-4	down	-1.3350807	IL11	Homo sapiens interleukin 11 (IL11), transcript variant 1, mRNA [NM_000641]	GTGTATGATTGTCTGTATTTTACAGAATTTCTGCCATGACTGTGTATTTTGCATGACACA
A_33_P3263193	0.016573612	5.219991E-4	down	-1.1816487	RHNO1	Homo sapiens RAD9-HUS1-RAD1 interacting nuclear orphan 1 (RHNO1), transcript variant 4, mRNA [NM_001257097]	GCGTGTGTTTTGAGTTTTTGTTTCTAACTGAAGAAATCTGTCAATATTAAATAGGGTGGG
A_23_P84651	0.0042528436	4.135982E-5	up	1.19163	CNBP	Homo sapiens CCHC-type zinc finger, nucleic acid binding protein (CNBP), transcript variant 3, mRNA [NM_003418]	GAGGTGTTATGTATAATGCTTGTTAAAGAACCCCCTTTCCGTGCCACTGGTGAATAGGGA
A_23_P74252	0.017042955	5.488166E-4	down	-1.3146017	LINC00339	Homo sapiens long intergenic non-protein coding RNA 339 (LINC00339), transcript variant 1, long non-coding RNA [NR_023918]	GAGCTTGTCTTTGGTTGTAATAAGAATCCATCAAAACCCATGTCTGGATCTCTCTTTGGC
A_23_P212696	0.019079836	6.667169E-4	down	-1.3848839	FSTL1	Homo sapiens follistatin-like 1 (FSTL1), mRNA [NM_007085]	CTTAGCCTGCAGGCTTCCTTGGGCTTTCTCTGTGTGTGTAGTTTTGTAAACACTATAGCA
A_23_P54649	0.017697504	5.8548985E-4	up	1.126784	TRADD	Homo sapiens TNFRSF1A-associated via death domain (TRADD), mRNA [NM_003789]	AAGCACCTTGATCTTTGGTGTCCTGGACTTCATCCTGGGTGCTGCAGATACTGCAGTGAA
A_23_P80827	0.010285046	2.3046877E-4	up	1.2980697	FYTTD1	Homo sapiens forty-two-three domain containing 1 (FYTTD1), transcript variant 2, mRNA [NM_001011537]	TTATGCTCGCCATGGAAAGCTATCAGTAACAGTTTCATGCTTATACCAAAGAATTAAATC
A_33_P3298425	0.011766141	2.8453566E-4	down	-1.2103397	LMO4	Homo sapiens LIM domain only 4 (LMO4), mRNA [NM_006769]	AGCTCTCATCAATGGCCATTTGAATTCACTTCAGAGCAATCCACTACTGCCAGACCAGAA
A_33_P3264528	8.043037E-4	4.4384996E-7	down	-3.346002	HOXA11	Homo sapiens homeobox A11 (HOXA11), mRNA [NM_005523]	GTGTTGCAGCACTTATACAGGCAACTGGGCACAAGGAAAATAAAGACGGTGGAAATTTGA
A_24_P273253	0.017912203	5.977275E-4	up	1.5925747	AHNAK2	Homo sapiens AHNAK nucleoprotein 2 (AHNAK2), mRNA [NM_138420]	CTTCAAGAAGAAACAATCACGTTTTTTGATGCCCGAGAAAGTTTCTCCCCTGAAGAGAAG
A_23_P318904	0.0073383	1.2369714E-4	up	1.8322432	SERTAD4	Homo sapiens SERTA domain containing 4 (SERTAD4), mRNA [NM_019605]	GTTTGCCAGTTAATTAGGGAGTTATTTGGTAAGCAAATCAATATAACCAGCAAAGATACC
A_23_P27947	0.010198848	2.2552884E-4	up	1.376371	PDCD2L	Homo sapiens programmed cell death 2-like (PDCD2L), mRNA [NM_032346]	AGCATGCTCAAGAGTGCTAATTTAGGTCTTTCTGTGGAATTTGGAACAATTCTAGTTTAC
A_24_P658427	0.006265931	9.1879076E-5	down	-1.2132027	NFIB	Homo sapiens nuclear factor I/B (NFIB), transcript variant 3, mRNA [NM_005596]	AACTGGTGTAAATCAAGCTTGACTTAATGTGATTGTTACTGTTATATCCAGCCTATACTG
A_21_P0010846	0.019504705	6.8873825E-4	up	3.0718668	XLOC_014512	BROAD Institute lincRNA (XLOC_014512), lincRNA [TCONS_l2_00003298]	AGTGTACAAAATGTTACAAAGAGCAGGGTTATCTCTCTATACCGCATTGTCAATTTAAAG
A_19_P00319588	0.015833896	4.7683623E-4	down	-1.6193227	LOC101929562	PREDICTED: Homo sapiens uncharacterized LOC101929562 (LOC101929562), misc_RNA [XR_241537]	ACAAAAGAAGAGATTGCCTTAGGGAAGGGGACTACAGTGAACACTGAGAACTTCTTCCCA
A_23_P206280	0.0029712096	1.7801844E-5	up	1.417614	GPR56	Homo sapiens G protein-coupled receptor 56 (GPR56), transcript variant 3, mRNA [NM_201525]	GCGTTCAATCTTGACCTTGAAGATGGGAAGGATGTTCTTTTTACGTACCAATTCTTTTGT
A_23_P169293	8.043037E-4	4.0247426E-7	up	4.6269226	DMRT1	Homo sapiens doublesex and mab-3 related transcription factor 1 (DMRT1), mRNA [NM_021951]	TTTAGTCCAGAGGCTGTAACACATTTGTAATACTTTAGGGTCCGTGACTACCATCTGCAT
A_19_P00317023	0.0073094717	1.2201901E-4	down	-1.1574783	PVT1	Homo sapiens cDNA FLJ26234 fis, clone ADG09627. [AK129745]	TGTCTAGAAATCAGCCTGGCTGGGACGCACACCAATAGGAGGGCATCCTCACCTTTCCCA
A_23_P128698	0.008545665	1.5966594E-4	down	-1.3811423	SPRY2	Homo sapiens sprouty homolog 2 (Drosophila) (SPRY2), mRNA [NM_005842]	AGAACTTGGTGACCCATGTATTGCATAAGCTAAAGCAACACAGACACTCCTAGGCAAAGT
A_23_P15582	0.01632158	5.082824E-4	up	1.2147909	XYLT2	Homo sapiens xylosyltransferase II (XYLT2), mRNA [NM_022167]	TGGAGTAATTGTGCCTGAAGCTCAGCGTGAAGTCTGAAATATGCAACAGAAGAAATATAT
A_23_P28068	0.015250895	4.450949E-4	up	1.1644282	GTPBP3	Homo sapiens GTP binding protein 3 (mitochondrial) (GTPBP3), transcript variant IV, mRNA [NM_133644]	CGTTCGACCCTTGATGCTGGGGCATCCGGGTTGGGATGGAGATAGGAGGATCTCAGTATA
A_21_P0000357	0.0076146265	1.314652E-4	down	-1.2179651	SNORA47	Homo sapiens small nucleolar RNA, H/ACA box 47 (SNORA47), small nucleolar RNA [NR_003014]	AAGGTGAGGCAGTTTTGCCCCGTGCTGCCTTCCACCGGTTAAGACCTCCAAAATCGAAGG
A_23_P350005	0.0020299384	6.721253E-6	up	2.032066	TRIML2	Homo sapiens tripartite motif family-like 2 (TRIML2), mRNA [NM_173553]	GTCCTTCTTGTGATGCTACTGTTAGCCCTTAATCTTCTGTGTGTAAAATCCAAGACCACG
A_33_P3225843	0.005085568	6.2042345E-5	up	8.11465	CCDC149	Homo sapiens coiled-coil domain containing 149 (CCDC149), transcript variant 1, mRNA [NM_173463]	TGCAAACTGTGAATATTCTGATGATGCCAGTACAGTTTGATTTATTAAATGTAGGTCCTC
A_23_P204277	0.0050319075	6.0137816E-5	down	-1.5070815	H2AFJ	Homo sapiens H2A histone family, member J (H2AFJ), transcript variant 1, mRNA [NM_177925]	AGCTGGCTCCCCCAGCAAAGGCCCTTTTCATGGTCGTCCCGCAATGCTTTTGAATGTGCT
A_33_P3214849	0.0140413055	3.8814737E-4	down	-2.3430629	KDELC2	Homo sapiens KDEL (Lys-Asp-Glu-Leu) containing 2 (KDELC2), mRNA [NM_153705]	CAATATCTGAGGAGAAGATGGAGTGAAGGGAATTCTTACTTTTTGCTTTATACCTTTCTA
A_33_P3213772	0.016762545	5.332141E-4	up	1.273031		SLIT-ROBO Rho GTPase activating protein 2 [Source:HGNC Symbol;Acc:19751] [ENST00000604247]	CGTAGCCTCTGGACACTGAGACTGGAAGGAGAATAAAGGATGCTTGTTGTTTTTAAACTA
A_33_P3326256	0.014277649	4.0070503E-4	up	1.1460001	MRPS16	Homo sapiens mitochondrial ribosomal protein S16 (MRPS16), mRNA [NM_016065]	GTATCTTTTCCTTCCTACCTTGATGCCAGTAATCTATAAGGGATCTTTATAGTTTGAATG
A_23_P324327	0.006690892	1.05130304E-4	up	1.576736	GPRC5B	Homo sapiens G protein-coupled receptor, family C, group 5, member B (GPRC5B), mRNA [NM_016235]	TCTGCAGGTTCCATGAAAACAGCCCTTTTCCAAGCCCATTGTTTCTGTCATGGTTTCCAT
A_33_P3352970	8.9715177E-4	8.072721E-7	down	-1.991547	IRAK2	Homo sapiens interleukin-1 receptor-associated kinase 2 (IRAK2), mRNA [NM_001570]	CTGAAAAGTCATGTTGCAAATCTTTCTGTGAAACAGATGCTATTTTAAATTCACTGGGAG
A_21_P0010769	0.0028768918	1.620414E-5	up	2.643768	ANKRD20A12P	Homo sapiens ankyrin repeat domain 20 family, member A12, pseudogene (ANKRD20A12P), non-coding RNA [NR_046228]	ACAAGGCGAGGTCGAGAGTCACCTTGTGTTGAAAATCTTACTAGTATAGGACTCAACAGA
A_23_P500353	8.9715177E-4	9.119823E-7	up	2.3088937	KCNN2	Homo sapiens potassium intermediate/small conductance calcium-activated channel, subfamily N, member 2 (KCNN2), transcript variant 1, mRNA [NM_021614]	CGGTCCTCTTCCACAGCACCACCAACTTCATCAGAGAGTAGCTAGAAGAGAATAAGTTAA
A_33_P3401673	0.012653803	3.26701E-4	up	1.2498225	GIT1	Homo sapiens G protein-coupled receptor kinase interacting ArfGAP 1 (GIT1), transcript variant 2, mRNA [NM_014030]	AAGTACCAGATGCTGGCATTTGTGCACAAGCTTCCCTGCCGGGACGATGATGGAGTCACC
A_24_P122732	0.0039493167	3.353982E-5	up	1.1693871	SLC41A1	Homo sapiens solute carrier family 41 (magnesium transporter), member 1 (SLC41A1), mRNA [NM_173854]	CTTTCATGGAAGTTTCATTTCTTTTCCCCGATTGTACCAACTGCATGTACTTTTGGCCTG
A_33_P3209866	0.017954074	6.0265424E-4	up	1.3186663	KANK1	Homo sapiens KN motif and ankyrin repeat domains 1 (KANK1), transcript variant 4, mRNA [NM_001256877]	TCTCTGTTGCTGTTGAGTCTCTGCTCCGTTTTGTACAGTCACAGGGAATTCTGATCTGAA
A_33_P3307197	0.0022764448	9.121373E-6	down	-1.4506191	PTGFRN	Homo sapiens prostaglandin F2 receptor inhibitor (PTGFRN), mRNA [NM_020440]	CTGCAGAATTTTCCGTAGACAAAGAAAGGATCTTGTGTATTTTTGTCCATATCCAATGTT
A_24_P193498	0.019312995	6.7676743E-4	down	-1.1537663	TM2D3	Homo sapiens TM2 domain containing 3 (TM2D3), transcript variant 1, mRNA [NM_078474]	CCTGTGTTGATCAAGACTTCAAATCCCAAAAGAACTTCATCATTAACATGACTTGCAGAT
A_33_P3308347	8.9715177E-4	8.817521E-7	down	-2.2331665	ADAMTS8	Homo sapiens ADAM metallopeptidase with thrombospondin type 1 motif, 8 (ADAMTS8), mRNA [NM_007037]	GTGGATCCATTTCAAGTATTTATGCAAATGTGTCTCTGAACTAAAGTGTGATCTTATGCC
A_23_P408249	0.013461427	3.6320568E-4	up	2.4764345	PCK1	Homo sapiens phosphoenolpyruvate carboxykinase 1 (soluble) (PCK1), mRNA [NM_002591]	GAACACTGGGTAGTAGCTAATGAAATTGAGAAGGGAAATCTTAGCATGCCTCCAAAAATT
A_33_P3306264	0.0021284928	8.036125E-6	up	1.6245737	LYPD3	Homo sapiens LY6/PLAUR domain containing 3 (LYPD3), mRNA [NM_014400]	AATTCAGGGCAGTATCCTGCAAAAGGGGGGCCCCAGCAGCCCCATAATAAAGGCTGTGTG
A_24_P237878	0.011166781	2.623387E-4	down	-1.3687973	FAM195B	Homo sapiens family with sequence similarity 195, member B (FAM195B), transcript variant 1, mRNA [NM_207368]	TGTGCTGGGAGGGTCACCAGGTCCCTTTTCCTTCCTGTGCCCTCTGAAAGCTAAGTGTCT
A_33_P3270485	0.014049168	3.898624E-4	up	1.2641281	CBX6	Homo sapiens chromobox homolog 6 (CBX6), mRNA [NM_014292]	GTGTCATTCGTGACTTTTTTGTAAAGAAGTTGTGTTTTCAGAGGTGATTTTATGACAGGA
A_19_P00318361	0.014910753	4.2846485E-4	up	1.3796903	KIF9-AS1	Homo sapiens KIF9 antisense RNA 1 (KIF9-AS1), long non-coding RNA [NR_033373]	AGTCAGGCACTCTCTTCTGTAAAGTCTCTTTTGTAAACTCCTACAAGCAGCTATTTCACT
A_21_P0010776	0.017228853	5.595922E-4	down	-1.150336	PARP8	Homo sapiens poly (ADP-ribose) polymerase family, member 8 (PARP8), transcript variant 3, mRNA [NM_001178056]	TTTGCAGATTCAGATACTCAGACTCCACCTTTACTTTTACCTATGTTGGCGGCCCCAGAA
A_23_P52031	0.01359707	3.6951868E-4	down	-1.3212368	PGM1	Homo sapiens phosphoglucomutase 1 (PGM1), transcript variant 1, mRNA [NM_002633]	TGCATTGCTGCTGCGTGGGTATTTGTCTCCTTAGCCATCAGGTACAGTTTACACTACAAT
A_23_P66682	0.006631827	1.0404096E-4	up	1.5829595	HOXB6	Homo sapiens homeobox B6 (HOXB6), mRNA [NM_018952]	ATTAATTTTCTATGTGTTGTGTTTGTAGTCTTGTCTTAGCTCTGGACGTGAAATACTTCG
A_23_P146551	0.010482779	2.380055E-4	up	1.2883129	MOB3B	Homo sapiens MOB kinase activator 3B (MOB3B), mRNA [NM_024761]	AGACAGGGAGTCGTGGCTGTCTCTACATAATACTAACATTTCAGTGAAAAAAGTACAGTT
A_24_P366526	0.0090676695	1.7623647E-4	up	1.2999846	SYNGR2	Homo sapiens synaptogyrin 2, mRNA (cDNA clone MGC:102914 IMAGE:4746277), complete cds. [BC105992]	GGAGATGCCCGGCCCTGGGATGCTGTTTGGAGATGGAATAAATGTTTTCTCATTCAAAAA
A_23_P23346	0.0038463078	3.1173327E-5	down	-1.3733665	MLLT11	Homo sapiens myeloid/lymphoid or mixed-lineage leukemia (trithorax homolog, Drosophila); translocated to, 11 (MLLT11), mRNA [NM_006818]	AATCTTCTGAACGGCATAAGTCCTATTTTAGCCTTACCTCCTGCATTTGCAATACGTAAT
A_21_P0002661	0.0053968336	7.1187635E-5	down	-1.5253909	XLOC_002094	BROAD Institute lincRNA (XLOC_002094), lincRNA [TCONS_00005149]	TCAGTGATGATGGTAATCATTTCCAAAAGAAGGTAGTGGTCCTCTTCCCTGAACTGTAAG
A_23_P164196	0.014157167	3.9425446E-4	up	1.574089	DLX4	Homo sapiens distal-less homeobox 4 (DLX4), transcript variant 1, mRNA [NM_138281]	TACCTACTTACCATACTGGGAGGTAGAAGAGATGCAGAGAAATGTGGAATTTGTGGACCT
A_24_P236091	0.0024996835	1.1429602E-5	up	2.7553065	ENO2	Homo sapiens enolase 2 (gamma, neuronal) (ENO2), mRNA [NM_001975]	TTCATTCATCCCATTAATCATTTCCCCATAACTCAATGGCCTAAAACTGGCCTGACTTGG
A_24_P45620	2.6279382E-4	2.0717303E-8	down	-23.170357	UTS2	Homo sapiens urotensin 2 (UTS2), transcript variant 1, mRNA [NM_021995]	AGAAAGTTTCAGGATTTCTCTGGACAAGATCCTAACATTTTACTGAGTCATCTTTTGGCC
A_33_P3235147	0.005017074	5.9229606E-5	down	-5.507666	DLX5	Homo sapiens distal-less homeobox 5 (DLX5), mRNA [NM_005221]	GGACACTTTCAATGGTGCCTTGAAATCTATGACCTCAACTTTTCAAAAGACTTTTTTCAA
A_23_P216596	0.0070227194	1.1391036E-4	down	-1.6116039	SVEP1	Homo sapiens sushi, von Willebrand factor type A, EGF and pentraxin domain containing 1 (SVEP1), mRNA [NM_153366]	TCTCGCTGTCATACAGCTGTTTGCCAGTCTCCCTGCTTAAATGGTGGAAAATGTGTAAGA
A_23_P137173	0.013574302	3.6812393E-4	down	-1.9916406	TMSB15A	Homo sapiens thymosin beta 15a (TMSB15A), mRNA [NM_021992]	TGTAGTTCTTGCATCCTATACTGGATAAGCCTGTTTTAACCTGCTATGATGGGTGCTTCC
A_23_P206310	0.01023859	2.27013E-4	up	1.5877911	KIAA0513	Homo sapiens KIAA0513 (KIAA0513), transcript variant 2, mRNA [NM_014732]	TGTTGCATTTTTGCAATCTTGTGTCCCGCTCGGTGATGTTCTACAAACTCTGTTTTAAGG
A_33_P3363260	0.0015354342	3.8203984E-6	down	-1.5290308	PGM2L1	Homo sapiens phosphoglucomutase 2-like 1 (PGM2L1), mRNA [NM_173582]	GGATTTCTTGTGGTTTTAGCCAAATGAAGTGTTATCAGTAATAAACAGGTCTCTTCATAG
A_33_P3364348	0.002822251	1.523242E-5	down	-1.4979964	JPH1	Homo sapiens junctophilin 1 (JPH1), mRNA [NM_020647]	CTTGCTGTGAAAAAGAACTCCCTACCTGTGAGTTCCTTTATTTATAATTCTTGAAACCAA
A_32_P42780	0.009020739	1.7476472E-4	down	-1.2770859	ZNF271	Homo sapiens zinc finger protein 271 (ZNF271), transcript variant 1, non-coding RNA [NR_024565]	AGGCAAGGCCTTTTGGGAGGTTTTGTAGTACATTAAAAGAATATACTATCTCTTCCAATG
A_33_P3272390	0.0048916596	5.4567085E-5	down	-1.3243747	RANBP2	Homo sapiens RAN binding protein 2 (RANBP2), mRNA [NM_006267]	GGAAAGGACTTTGATTTCTCTTTGTTATTTAATCACTGATGTGGTCTAAACCCACGATAA
A_33_P3285545	0.0019116151	5.8396963E-6	up	3.0838675	CLDN4	Homo sapiens claudin 4 (CLDN4), mRNA [NM_001305]	GGGGTTTTTCCTCTTCCTTCTTTGTGGTTTCTGTTTTGTAATTTAAGAAGAGCTATTCAT
A_23_P102109	0.0035578406	2.4959221E-5	up	1.3513582	TUBA4A	Homo sapiens tubulin, alpha 4a (TUBA4A), transcript variant 1, mRNA [NM_006000]	GCACTGATATGTGGGTGAGGGCATGGAGGAGGGTGAGTTCTCCAAGGCCCATGAGGATAT
A_33_P3244283	0.0014145512	2.8893749E-6	up	1.7020186	CAMK2N2	Homo sapiens calcium/calmodulin-dependent protein kinase II inhibitor 2 (CAMK2N2), mRNA [NM_033259]	GTAAATGTTCCTCCATCCTCACTGTACCAGGAGTGTGTGAATAAACACAGACCCCCTCTG
A_23_P204751	0.010642737	2.4398482E-4	up	1.6056205	ASIC1	Homo sapiens acid-sensing (proton-gated) ion channel 1 (ASIC1), transcript variant 1, mRNA [NM_020039]	TCATACCTCCCCAGAGGGAAGCAGGAATGAGGCCAAAAAGTGTGCATTGGATAGGGGAAC
A_23_P79108	0.015202989	4.404579E-4	up	1.3754276	ATP8B3	Homo sapiens ATPase, aminophospholipid transporter, class I, type 8B, member 3 (ATP8B3), transcript variant 1, mRNA [NM_138813]	TCTAAAGACAAGGACTCCACATGCTTTTCTTTTTCTAATAAACCAGGGTCCATCTGACCC
A_21_P0003712	0.008280163	1.5258385E-4	up	1.4189923	XLOC_003854	BROAD Institute lincRNA (XLOC_003854), lincRNA [TCONS_00008410]	AACCAGCTCATCTAAGCACCAGACACAAGATTTTACTGCTTTTGTCAGGTGGAGTGGGAA
A_23_P139396	0.011166781	2.6228695E-4	up	1.0476192	C11orf73	Homo sapiens chromosome 11 open reading frame 73 (C11orf73), transcript variant 1, mRNA [NM_016401]	AGGAAGCCAACATCCTTTTGGAGCCATGAATATTGTCCGAACTCCATCTGTTGCTCAGAT
A_33_P3422991	0.018338032	6.2991533E-4	down	-1.1360338	SLC36A4	Homo sapiens solute carrier family 36 (proton/amino acid symporter), member 4 (SLC36A4), transcript variant 2, mRNA [NM_001286139]	TCAGTTCTATGTTCCAGCAGAGATCATTATCCCTGGGATCACATCCAAATTTCATACTAA
A_33_P3341787	0.012182763	3.0589913E-4	up	1.2564945	IDS	iduronate 2-sulfatase [Source:HGNC Symbol;Acc:5389] [ENST00000428056]	TCGGTGGGAAAAGTCTTTCACCCTGGTACTGCTCCACGTCCAGAGTCTGGGTTCTCTTGG
A_23_P145874	0.015495946	4.5871836E-4	up	2.1608868	SAMD9L	Homo sapiens sterile alpha motif domain containing 9-like (SAMD9L), mRNA [NM_152703]	CATTGATATCCACTGGTCACATCATAACTGTCTATAGGGCAATAAAATCTGTGTTAAACT
A_23_P88099	0.0037022473	2.7654303E-5	up	2.3486218	MCF2L	Homo sapiens MCF.2 cell line derived transforming sequence-like (MCF2L), transcript variant 2, mRNA [NM_024979]	TTGTGTGACCCTCCCCATAAAGGCACTTTACAGCTTCATGTTTCATCCACTGTCACTTTT
A_23_P50357	0.0021284928	8.138269E-6	up	1.3707256	ARHGEF18	Homo sapiens Rho/Rac guanine nucleotide exchange factor (GEF) 18 (ARHGEF18), transcript variant 1, mRNA [NM_015318]	GCTAATTATTTTTACAATGATTACAACATTTCCTCACTGCGGGATATTTCTGACCCGCTT
A_23_P312851	0.005963682	8.5126216E-5	up	1.4809994	PMEL	Homo sapiens premelanosome protein (PMEL), transcript variant 3, mRNA [NM_006928]	ATCTCTGATATATAGGCGCAGACTTATGAAGCAAGACTTCTCCGTACCCCAGTTGCCACA
A_23_P166899	0.0057010534	7.7753386E-5	up	1.3652724	DNAJB11	Homo sapiens DnaJ (Hsp40) homolog, subfamily B, member 11 (DNAJB11), mRNA [NM_016306]	TGGAAGAAAGGGGAAGGGCTCCCCAACTTTGACAACAACAATATCAAGGGCTCTTTGATA
A_24_P227069	0.0015068345	3.5934288E-6	up	1.3274841	GPAM	Homo sapiens glycerol-3-phosphate acyltransferase, mitochondrial (GPAM), transcript variant 2, mRNA [NM_020918]	TGATTGCATTTGAAAGAGATTCTTGACCTTATTTCTAAACGTCTAGAGCTCTGAAATGTC
A_23_P54991	0.0101418905	2.219867E-4	up	1.3368543	DYNLL2	Homo sapiens dynein, light chain, LC8-type 2 (DYNLL2), mRNA [NM_080677]	TGTGCTACTGCATGGACTGTATACTCGATTTCATGTGTATGTCGCAGTAAACAAAACCAA
A_33_P3622802	0.005389344	7.023531E-5	down	-1.3209125	ABI1	Homo sapiens abl-interactor 1 (ABI1), transcript variant 1, mRNA [NM_005470]	GTTGTACAGTGAACTGTTGTACACTGGTTCAATGAAAGGAAGTTAAAAGTACCTTTTACA
A_32_P26376	0.0019605006	6.093919E-6	up	1.4364815	POGLUT1	Homo sapiens protein O-glucosyltransferase 1 (POGLUT1), transcript variant 1, mRNA [NM_152305]	GTTTCCCCACAACTTTTGAAGGTTTTATTTGTTGTTGTTATTACTAGTTCAGTCCCAAAC
A_33_P3318581	0.0019661002	6.161137E-6	up	1.4594445	PLOD2	Homo sapiens procollagen-lysine, 2-oxoglutarate 5-dioxygenase 2 (PLOD2), transcript variant 1, mRNA [NM_182943]	GGGAGGGTTATTTGCTTTTTTATCTTCCTGGCATAATTTCCATTTTATTCTTCTGAGTGT
A_21_P0005188	0.011050185	2.5763948E-4	down	-2.6518931	HOXA11-AS	Homo sapiens HOXA11 antisense RNA (HOXA11-AS), antisense RNA [NR_002795]	TTGGTCAGCAAAACAGACCCAGCCTTTCCGAGGCTTCGTCTGACTTGGCCCGAAAGGTTG
A_24_P281580	0.015748436	4.7333146E-4	up	1.1993886	GATS	Homo sapiens GATS, stromal antigen 3 opposite strand (GATS), transcript variant 1, mRNA [NM_178831]	CAGTCATCGCCCCACTGGCTGACCAGAACATATCCGTGTTCATGCTGTCCACGTATCAGA
A_23_P21324	0.004327031	4.3237047E-5	down	-1.4876418	TWIST2	Homo sapiens twist family bHLH transcription factor 2 (TWIST2), transcript variant 1, mRNA [NM_001271893]	ACTTTCACGCCGCTATTCTTTTCCTTTCTCCGTGATTGCTTGGCTAGCCATTTTAAAAAA
A_24_P943393	0.004162429	3.983359E-5	down	-1.3332199	AHNAK	Homo sapiens AHNAK nucleoprotein (AHNAK), transcript variant 1, mRNA [NM_001620]	ATTTCCAGCACTTTAATGGCCAATTAACTGAGAATGTAAGAAAATTGATGCTGTACAAGG
A_23_P200001	0.0065481183	1.0092096E-4	down	-1.1780802	NEXN	Homo sapiens nexilin (F actin binding protein) (NEXN), transcript variant 1, mRNA [NM_144573]	GCGGGGCCAAAAAAGGAAACCAGGAGTGCCACTATGCTGACTTCTTATTCCTTTTCATAA
A_23_P164814	0.0029712096	1.7749948E-5	down	-1.6600612	C19orf57	Homo sapiens chromosome 19 open reading frame 57 (C19orf57), mRNA [NM_024323]	TTGCAAATTTTAGGGTCCTGAGCCAAGTATGGATGGTTCAGAATTTGTTTCTTTCCTGGA
A_23_P21033	0.0024996835	1.1323367E-5	up	1.3089981	GMPS	Homo sapiens guanine monphosphate synthase (GMPS), mRNA [NM_003875]	CCCTGTAGAGGTGGTATTAAAGATGGTCACTGAGATTAAGAAGATTCCTGGTATTTCTCG
A_32_P42964	0.017959697	6.0456776E-4	down	-1.164748	NUPR1L	Homo sapiens nuclear protein, transcriptional regulator, 1-like (NUPR1L), mRNA [NM_001145712]	AAGTATTTACTGTAACTCCAACTGTAACTTGGTTCTGAGGAGGAGAGAATCCATGTTTGG
A_23_P161190	0.019504705	6.9046713E-4	down	-1.2164398	VIM	Homo sapiens vimentin (VIM), mRNA [NM_003380]	TGATTAAGACGGTTGAAACTAGAGATGGACAGGTTATCAACGAAACTTCTCAGCATCACG
A_23_P62336	0.0021059392	7.6369815E-6	up	3.3485823	CPXCR1	Homo sapiens CPX chromosome region, candidate 1 (CPXCR1), transcript variant 1, mRNA [NM_033048]	GCAAACATATATTGGAAGGCCAGACAAAGTTCTACCAAGTGTTTCCAGAGATTCTGCTAC
A_24_P314337	6.035098E-4	1.7841595E-7	up	2.1227095	PAGE1	Homo sapiens P antigen family, member 1 (prostate associated) (PAGE1), mRNA [NM_003785]	TGATCTATGTAGAATCTTCTGAGGAGTCCAGTGATGAGCAACCTGACGAAGTGGAATCAC
A_23_P142590	0.018816037	6.537904E-4	up	1.2372324	ILKAP	Homo sapiens integrin-linked kinase-associated serine/threonine phosphatase (ILKAP), mRNA [NM_030768]	GAGAAAACCGTGAAGAGATGCCTTTTGGACACTTTCAAGCATACTGATGAAGAGTTCCTT
A_33_P3396607	0.015927594	4.8232172E-4	down	-1.3565277	UGDH	Homo sapiens UDP-glucose 6-dehydrogenase (UGDH), transcript variant 1, mRNA [NM_003359]	CAGTTCAATGAGAAGAGGGAGACAAATATAAAGATGAGGACAGAAGCATCTCTACAGATG
A_33_P3335451	0.0025396058	1.1818661E-5	up	1.4107656	PARL	Homo sapiens presenilin associated, rhomboid-like (PARL), transcript variant 1, mRNA [NM_018622]	CCCCAGTCCGTGTCTTTTTAGAATGTGAATGATGATAAAGTTGTGAAATAAAGGTTTCTA
A_24_P246351	0.004561502	4.7066515E-5	up	1.5718063	FAM71E1	Homo sapiens family with sequence similarity 71, member E1 (FAM71E1), mRNA [NM_138411]	GACTCTGAGTCTTCCAGCATCCTTCAAGGTCACCGAATGACCAGAGATCAAAGTACCTTG
A_21_P0000489	0.015319235	4.4835458E-4	up	1.1861314	SNORD104	Homo sapiens small nucleolar RNA, C/D box 104 (SNORD104), small nucleolar RNA [NR_004380]	CAATTAAAGCACGTGTTAGACTGCTGACGCGGGTGATGCGAACTGGAGTCTGAGCCTGCC
A_33_P3372074	0.011111136	2.6015547E-4	up	1.5559857	LLGL2	Homo sapiens lethal giant larvae homolog 2 (Drosophila) (LLGL2), transcript variant 3, mRNA [NM_001031803]	GTAGTGGGCTGGGTTTTAAGTTATAAATGTTAACTGCCTCTGGGTGAAAAAGTTTTTAAT
A_23_P15402	0.0050779954	6.138438E-5	up	1.1305381	SAT2	Homo sapiens spermidine/spermine N1-acetyltransferase family member 2 (SAT2), mRNA [NM_133491]	CTGGAGGAAGGAGGGTTAGGGGTGCCTATCCTCAAGTATTGGAAGAGCAGAATTGAGGGA
A_23_P255331	0.0038536005	3.1367133E-5	up	2.8625352	MGARP	Homo sapiens mitochondria-localized glutamic acid-rich protein (MGARP), mRNA [NM_032623]	TTTCAGCAACAAATGCCATAGGGTGTCTGATAAGTGCTTTGGTGTTTTTAGTACACTTAG
A_24_P362904	0.00267133	1.3583302E-5	up	1.4758914	PFKFB4	Homo sapiens 6-phosphofructo-2-kinase/fructose-2,6-biphosphatase 4 (PFKFB4), mRNA [NM_004567]	GACACACTCATTTGTTAGCCATAGTGGGTTCCCTTGGTCAGCAACAGTGCATGTACCTCT
A_24_P55496	0.019664334	6.9993077E-4	down	-1.2449019	OSR2	Homo sapiens odd-skipped related transciption factor 2 (OSR2), transcript variant 2, mRNA [NM_053001]	TCGGGCCTCAGTAAATTGACTCCGGACAGAAAGCCCTCTCGAGGAAGGTTGCCCTCCAAA
A_21_P0003651	0.017808208	5.911242E-4	down	-2.135259	XLOC_003686	BROAD Institute lincRNA (XLOC_003686), lincRNA [TCONS_00008252]	ACCTGGAAACAGCATCAATCTTCTCAGAAGTTTCCAAGGACTCCAGATATGCAGGGAACT
A_23_P57856	0.010133533	2.210396E-4	down	-1.4310026	BCL6	Homo sapiens B-cell CLL/lymphoma 6 (BCL6), transcript variant 2, mRNA [NM_001130845]	CTGCGTTAAAGGCTCGATTTTGTATCTGCAGGCAGACACGGATCTGAGAATCTTTATTGA
A_23_P63736	0.004000943	3.5333804E-5	up	2.575999	LINC00839	Homo sapiens long intergenic non-protein coding RNA 839 (LINC00839), long non-coding RNA [NR_026827]	AAACAACAGCATGAGTGGCCTGAGCCTTAACAACATGTTTTTGCTGCAGATAATCGGCCA
A_24_P393571	9.9959E-4	1.2934382E-6	down	-3.805213	GDA	Homo sapiens guanine deaminase (GDA), transcript variant 2, mRNA [NM_004293]	AGCCTGTCAGAAAGCATTCTTTAGAGAAAACCACTTTACATTTGTTGTTAAACTCCTGAT
A_23_P369899	0.0021072412	7.7355335E-6	up	1.8688406	TMEM158	Homo sapiens transmembrane protein 158 (gene/pseudogene) (TMEM158), mRNA [NM_015444]	AAATTGCTATTGCTGTAGTAAGAGAAGCTCTTTGTATCTGAACATAGTTGTATTTGAAAT
A_24_P943575	0.008619107	1.6154774E-4	down	-1.2968684	CHD6	Homo sapiens chromodomain helicase DNA binding protein 6 (CHD6), mRNA [NM_032221]	GATTTCTTAGAAATGCTGCTCTCTCTATTTAACTAACATTTTGTTCAGTTTTGCCTCCAG
A_21_P0014114	0.0038463078	3.114058E-5	up	1.9754686		Homo sapiens, clone IMAGE:5110701, mRNA. [BC033667]	AAGGGTCAGTGAGCTAGTTGTGTATGTTCTGAATCACATGGAAATAAATGCATCGAACAT
A_23_P57658	0.019739091	7.037588E-4	up	1.4688922	HRASLS	Homo sapiens HRAS-like suppressor (HRASLS), mRNA [NM_020386]	TTGGGAGGAGGAAAAGAAACCTGGGGTGAATACTTATTTTCAGTGCATCATTACTGTTCC
A_33_P3296940	0.007386974	1.2556373E-4	up	1.4210657	FNDC3B	Homo sapiens fibronectin type III domain containing 3B (FNDC3B), transcript variant 1, mRNA [NM_022763]	GTTAATCCAGGTGAGACTTTCACAATAAGAGCAGAGGATGGAACACTTCAGTGCATTCAA
A_33_P3257279	0.007990159	1.4330288E-4	up	1.2461438	TMEM145	Homo sapiens transmembrane protein 145 (TMEM145), mRNA [NM_173633]	GGGCCTTCCCTCGGGTCCCTGGCAGAAAGACATTTTACCCCTTCTTGCCAAAATAAAAAA
A_23_P207927	0.009255206	1.8222573E-4	up	1.2334358	C17orf80	Homo sapiens chromosome 17 open reading frame 80 (C17orf80), transcript variant 1, mRNA [NM_017941]	AGCTTGAATTCCCGAATCTTCCTGCAAGGTGCATACAAATGCAGCGTGAGAATCCATACA
A_24_P849801	0.0029712096	1.7636918E-5	down	-1.3748282	RPL22	Homo sapiens ribosomal protein L22 (RPL22), mRNA [NM_000983]	ACGTGTAAGTAATGTTTCTACAGGTCTTTGCAACAAACTGTCACTTTCGTCTCCAGCAGA
A_23_P138541	0.002822251	1.5499478E-5	down	-2.004104	AKR1C3	Homo sapiens aldo-keto reductase family 1, member C3 (AKR1C3), transcript variant 1, mRNA [NM_003739]	TTTTGAGTTCCAGTTGACTGCAGAGGACATGAAAGCCATAGATGGCCTAGACAGAAATCT
A_23_P203957	0.002060766	7.148246E-6	down	-1.9923304	TMTC1	Homo sapiens transmembrane and tetratricopeptide repeat containing 1 (TMTC1), transcript variant 2, mRNA [NM_175861]	TAGCTTTTGTAGAACCTTCCAGAATATGTGGGGAAAAAGGGCTATTGCTAAGTGAGCTTT
A_23_P87500	0.008387906	1.5506524E-4	up	1.1726452	ORMDL2	Homo sapiens ORM1-like 2 (S. cerevisiae) (ORMDL2), mRNA [NM_014182]	CCAGTTCCATGGGGTTCGTGTCTTTGGCATCAACAAATACTGAGGGATGGGTTTTGGGAC
A_24_P938614	0.006059691	8.7831264E-5	up	3.1931646	CDS1	Homo sapiens CDP-diacylglycerol synthase (phosphatidate cytidylyltransferase) 1 (CDS1), mRNA [NM_001263]	AATTATTGTATCTCTTCCTTTTCACTTTGGTTTGAACAAAGATAGTGTCACCTTGTTCCG
A_23_P96285	0.0014632412	3.0954568E-6	up	2.5770392	REEP1	Homo sapiens receptor accessory protein 1 (REEP1), transcript variant 2, mRNA [NM_022912]	ATGTGGACTTGTGCTTATAAACTGGAGAGTTTAGTCATAATCCCTCCTGGCTTTGTGTGA
A_23_P4551	0.010186542	2.2445364E-4	down	-1.4903566	SETBP1	Homo sapiens SET binding protein 1 (SETBP1), transcript variant 1, mRNA [NM_015559]	CCAGACCCACCAGAAAGACAAGTGTCTAGCAATGCCTTGGTACCTGATCTTTTTCATTCA
A_33_P3210805	0.014666192	4.179687E-4	up	5.165464	GABRG3	Homo sapiens gamma-aminobutyric acid (GABA) A receptor, gamma 3 (GABRG3), transcript variant 1, mRNA [NM_033223]	AATGTAAATCAGGATCCTGGAGGAAAGGGCGTATTCACATAGACATCTTGGAGCTGGACT
A_23_P340131	0.007265843	1.2052878E-4	up	2.4826648	PRSS16	Homo sapiens protease, serine, 16 (thymus) (PRSS16), mRNA [NM_005865]	TGGTACTTCCAGCTTCCAACTCTAGGGATTCATGATTCTGGTGGAGATTCCTTCTTCCAG
A_33_P3275350	0.0065189027	1.0021372E-4	up	1.3639293	NCS1	Homo sapiens neuronal calcium sensor 1 (NCS1), transcript variant 1, mRNA [NM_014286]	TTTAATATCTGCGGAATAAACCCAATGGTTAATTTTTGAATGAATAAAAGGCTTTTGTTG
A_23_P35148	0.011840756	2.886737E-4	down	-1.4200493	TAF13	Homo sapiens TAF13 RNA polymerase II, TATA box binding protein (TBP)-associated factor, 18kDa (TAF13), mRNA [NM_005645]	TGAAGATATCGTCTTCTTGATTCGAAAGGACCCAAGGAAGTTTGCCAGGGTTAAAGACTT
A_23_P149975	0.0010502836	1.448981E-6	down	-1.5762819	FAM107B	Homo sapiens family with sequence similarity 107, member B (FAM107B), transcript variant 2, mRNA [NM_031453]	AGGATTTAGTATGCTCCGTAGAGACAGTTCAGCCAGTCATTTCTGCATTGGAGAGACTTC
A_24_P88696	0.0018310791	5.4132297E-6	down	-3.4220555	SCG2	Homo sapiens secretogranin II (SCG2), mRNA [NM_003469]	GATGGCATATGAAAACCTGAACGACAAGGATCAAGAATTAGGTGAGTACTTGGCCAGGAT
A_33_P3347291	0.0059322068	8.437158E-5	down	-5.1748524	INMT	Homo sapiens indolethylamine N-methyltransferase (INMT), transcript variant 2, mRNA [NM_001199219]	GAGAGAGCTAGTGTAAGCTGTTGATGAGAGCTGTTGCTGAATAAAACCATATTCACCTGC
A_32_P221305	0.0046695285	5.0169434E-5	up	5.783974	LINC00937	Homo sapiens long intergenic non-protein coding RNA 937 (LINC00937), long non-coding RNA [NR_024420]	TTCAGCCTCTGGAAAGTGGTGGTAGTTCCAGATTTATGTGGATGTTACTTTGTTTTTCCC
A_24_P140608	0.008165452	1.4914786E-4	up	1.751104	HBEGF	Homo sapiens heparin-binding EGF-like growth factor (HBEGF), mRNA [NM_001945]	CCCATCTGTAGTAATTTATTGTCTGTCTACATTTCTGCAGATCTTCCGTGGTCAGAGTGC
A_21_P0012152	0.0034700115	2.3389186E-5	up	1.956784	APCDD1L-AS1	Homo sapiens APCDD1L antisense RNA 1 (head to head) (APCDD1L-AS1), long non-coding RNA [NR_034147]	AGAAAGAGAATCACTCGGATGGGAAAAGTTAACTGGATTGTTCCCACCTGCATGGATCAC
A_21_P0000714	0.016594172	5.248011E-4	up	1.2883288	SNHG16	Homo sapiens small nucleolar RNA host gene 16 (non-protein coding) (SNHG16), transcript variant 1, long non-coding RNA [NR_038108]	TGCTGTGTGATAACTTGTTTGGATGAGACTTAACTTAAAACCACTTACAATAAACTTGGG
A_33_P3359368	0.018253978	6.2526687E-4	down	-1.4574779	DHRS4L1	Homo sapiens dehydrogenase/reductase (SDR family) member 4 like 1 (DHRS4L1), transcript variant 1, mRNA [NM_001277864]	ATTTTTTGCCCAGGCCACTGGGGAATTTGAGGGGAGATGAGAGAGAAGGAAGCTGGAGTG
A_23_P252681	0.016982088	5.4421404E-4	up	1.2459102	PCYT1A	Homo sapiens phosphate cytidylyltransferase 1, choline, alpha (PCYT1A), mRNA [NM_005017]	ATGTTTGCTCCAACACAGAGGACAGAAGGTATCTCCACATCAGACATCATCACCCGAATT
A_23_P207742	0.009910676	2.1036674E-4	down	-1.1587274	THRA	Homo sapiens thyroid hormone receptor, alpha (THRA), transcript variant 2, mRNA [NM_003250]	GGCATGAGTCTGTTTCCCAAGCTAGACTGTGTCTGAATCATGTCTGTATCCCCAGTGCCC
A_23_P64825	0.015546081	4.6206158E-4	up	1.6014707	LACRT	Homo sapiens lacritin (LACRT), mRNA [NM_033277]	AAAGGAATGCACGGAGGCGTGCCAGGTGGAAAACAATTCATCGAAAATGGAAGTGAATTT
A_33_P3402611	0.008023046	1.4436708E-4	up	2.1628199		ankyrin repeat domain 20 family, member A3 [Source:HGNC Symbol;Acc:31981] [ENST00000417703]	AGTGATTTTTCTTAGAAGCAGAGGTGGAGCCACTGAGGAAGCACAGGCGAGCCCTCCCCA
A_23_P204016	0.0030000652	1.8152112E-5	up	1.7208463	CACNB3	Homo sapiens calcium channel, voltage-dependent, beta 3 subunit (CACNB3), transcript variant 1, mRNA [NM_000725]	CTCACCCTGCCAGGAAGCTTCTTAACATGTGACAGGACCAGGGACCAGGAGCATGGTGAA
A_23_P149496	0.010642737	2.438877E-4	up	1.1189756	XKR8	Homo sapiens XK, Kell blood group complex subunit-related family, member 8 (XKR8), mRNA [NM_018053]	TTTTTTGCCTTAGCCAGTGTACCTCCTACCTCAGTCTATGTGAGAGGAAGAGAATGTGTG
A_33_P3327592	0.0035578406	2.5049467E-5	up	1.258516	RNF13	Homo sapiens ring finger protein 13 (RNF13), transcript variant 1, mRNA [NM_007282]	GCCTTGTATGAGGGGAGTTTGAATGTTAATAAACATGTTTTCCACTTTAAGATCCAGTAA
A_24_P942604	0.006458343	9.80099E-5	down	-1.3284837	SMC1A	Homo sapiens structural maintenance of chromosomes 1A (SMC1A), transcript variant 1, mRNA [NM_006306]	GGGGTGACAAGATAAGCCAGGCTCTAGAGCTGCTTTGGATCATGAACCATTTTCAAGTTT
A_33_P3767773	0.010186542	2.241786E-4	down	-1.3631136	UBR4	Homo sapiens ubiquitin protein ligase E3 component n-recognin 4 (UBR4), mRNA [NM_020765]	CCCGGCCAGCTTCATACTTGAGTGTGCACATCTTGAGAAATAAACAAGTGACTTAACACA
A_33_P3229032	0.0027897668	1.4733553E-5	up	4.1426606	CLEC11A	Homo sapiens C-type lectin domain family 11, member A (CLEC11A), mRNA [NM_002975]	TGAAGGGGCGGGCACCAGGCTAGGTCCGGTGCCAATAAATCCTTGTGGAATCTGACTTGA
A_33_P3400547	0.0025534173	1.2228866E-5	down	-1.3203979	MED21	Homo sapiens mediator complex subunit 21 (MED21), transcript variant 1, mRNA [NM_004264]	CCAGCGTTAGCTGTAAAAGTTGCAGCAATTTATTGGCTAGTCATAGAAAATTTTTGAACT
A_23_P89710	0.0050319075	6.0029623E-5	down	-1.1711953	CEP192	Homo sapiens centrosomal protein 192kDa (CEP192), mRNA [NM_032142]	TTGCTTGTCATTCAAACAGATGAAGGCAAGAGTATTGCTATTCGACTAATTGGTGAAGCT
A_23_P136196	0.006944558	1.11684494E-4	down	-1.2982391	TBC1D19	Homo sapiens TBC1 domain family, member 19 (TBC1D19), mRNA [NM_018317]	TCACTGGCAACACATCTAGTTTTTCATTAGAAACAAATCATGAACTATGCAAACTCTGCA
A_23_P156739	0.015250895	4.4523907E-4	down	-1.0995384	UQCC2	Homo sapiens ubiquinol-cytochrome c reductase complex assembly factor 2 (UQCC2), mRNA [NM_032340]	GAAATAGATAAAGGCATGTGGAAGAAACTGCAGGAGAAGTTTGCCCCCAAGGGTCCTGAG
A_23_P128624	0.016363544	5.1116926E-4	down	-1.2437098	CARS2	Homo sapiens cysteinyl-tRNA synthetase 2, mitochondrial (putative) (CARS2), mRNA [NM_024537]	CTTCTCAGGGTCAAGGCTTTATGTTAAAGCTTCCTGTCGGGGCTGCTAGGTCAGCATTAA
A_24_P833129	0.017569626	5.772397E-4	up	1.9900562	ISPD	Homo sapiens isoprenoid synthase domain containing (ISPD), transcript variant 1, mRNA [NM_001101426]	TGTGTAGTTATGGATACAGAAGAAGATAACAAACATGTAGGTCATCTTCTTGAAGAAGTG
A_32_P76853	0.00196977	6.211459E-6	up	1.6787728	LOC101059918	Homo sapiens golgin subfamily A member 8R-like (LOC101059918), mRNA [NM_001282484]	CTATTCTTCAACCACCTTGGTTACTCTGACATAGGAATTTACTTCTTTTTCTTTGAATGG
A_23_P86653	0.012112345	3.024565E-4	down	-2.7897954	SRGN	Homo sapiens serglycin (SRGN), transcript variant 1, mRNA [NM_002727]	AGGACTTGGGTCAACATGGATTAGAAGAGGATTTTATGTTATAAAAGAGGATTTTCCCAC
A_23_P389281	0.0018240996	5.2487935E-6	down	-5.0093093	HOXA13	Homo sapiens homeobox A13 (HOXA13), mRNA [NM_000522]	TTAGTGATTCATCTTCACAGCACATTTTTAATCAAGCAGTTATTTCAACCAGCACATTCG
A_33_P3394694	0.012532798	3.2153103E-4	up	1.627513	LOC100128498	Homo sapiens cDNA FLJ44788 fis, clone BRACE3038570. [AK126742]	GAGATCTGATGGTTTTATAAGGGGTTTCCTTTTTTGTTGGCTCTCATTCTCTCTCTTGCC
A_32_P52785	0.007901987	1.4043381E-4	down	-2.1202528	DAAM2	Homo sapiens dishevelled associated activator of morphogenesis 2 (DAAM2), transcript variant 2, mRNA [NM_015345]	GTCATCAACCTAACAAACACAACCTTCTCAGCAGCATTTCTCCCCTGTGATGGAAATAAA
A_23_P152115	0.008387906	1.5500947E-4	down	-1.2973094	NME3	Homo sapiens NME/NM23 nucleoside diphosphate kinase 3 (NME3), mRNA [NM_002513]	ACACTGTCCTGGTGCCCAGCCCAACGTGGTCCAACGTTTTTTTATAATAAAGTCCTCGTT
A_23_P164797	0.008855079	1.6763783E-4	down	-1.2346692	ZNF580	Homo sapiens zinc finger protein 580 (ZNF580), transcript variant 1, mRNA [NM_016202]	TGAACCGGTGGTTGTCTGCGGGGAAGAGATGATAAAGAGCACGGGCACGGTCTGGTTCAT
A_24_P38081	0.0013710617	2.2968572E-6	up	1.4254771	FKBP5	Homo sapiens FK506 binding protein 5 (FKBP5), transcript variant 1, mRNA [NM_004117]	CCCCATGGAACAAATGGGATCAATTTGTGAGTTTTTTCCTTTAATGATAACTAAAATCCC
A_23_P48988	0.012698761	3.2911313E-4	up	2.1687603	SH3GL3	Homo sapiens SH3-domain GRB2-like 3 (SH3GL3), transcript variant 1, mRNA [NM_003027]	TGTGCTCTCAGTGCGGTGTTCTGTGACATCCTTTGCTCTCTGACCAACTTAATGACTTTT
A_33_P3288614	0.008981829	1.7347981E-4	down	-1.5440195	LOC101927322	PREDICTED: Homo sapiens uncharacterized LOC101927322 (LOC101927322), misc_RNA [XR_245474]	GAGGATCTGTTACCTGCATGTGCCAATTATGGAAATAAAATCTTCTAGTCTTTACTGGAA
A_33_P3362296	0.0023281614	9.54409E-6	up	2.0800319	KCNG1	potassium voltage-gated channel, subfamily G, member 1 [Source:HGNC Symbol;Acc:6248] [ENST00000396017]	CCCACACAAGGTTTCCCAAAAATTTGACTTGGTTGCCAACAATAAAAGTGAAGTTTTTTC
A_23_P46725	0.0028975038	1.6815644E-5	down	-1.3346002	EPC1	Homo sapiens enhancer of polycomb homolog 1 (Drosophila) (EPC1), transcript variant 1, mRNA [NM_025209]	CCTGGGGACTTGATTAGGTGCTATGCATCAGTAGCATTTTGAATGCAAGGGATGATGGAA
A_33_P3238433	0.010186542	2.2368379E-4	down	-1.2873178	ALDH3A1	Homo sapiens aldehyde dehydrogenase 3 family, member A1 (ALDH3A1), transcript variant 1, mRNA [NM_001135168]	TCACCGCCGCTCTTGCCTGGTGAGGCCTCTGATGAATGATGAAGGCCTGAAGGTCAGATA
A_23_P76731	0.0067560175	1.07022555E-4	up	1.3330028	MOK	Homo sapiens MOK protein kinase (MOK), transcript variant 1, mRNA [NM_014226]	TATATGAATCAAAACAAACGAGCAGGCATTTCTGTGATGTGTTGGGCGTGGTTGGAAGGT
A_33_P3235410	0.016197504	5.002363E-4	down	-1.6352358	PTPLA	PREDICTED: Homo sapiens protein tyrosine phosphatase-like (proline instead of catalytic arginine), member A (PTPLA), transcript variant X2, mRNA [XM_005276862]	GGGATTACCACTTCCGGCTTAATATTTTAAACTTTCTCCAGGGTTTATAGAAAAATGTGA
A_32_P207169	0.0012040247	1.7797325E-6	up	1.9886042	SERTAD4-AS1	Homo sapiens SERTAD4 antisense RNA 1 (SERTAD4-AS1), long non-coding RNA [NR_024337]	TTTCCATTTCATTTGTACACTTAAAACTTGGGTGACTGACATGCAGTTAAGTGAATTTCC
A_24_P353289	0.017018246	5.4616947E-4	down	-1.151551	GUCD1	Homo sapiens guanylyl cyclase domain containing 1 (GUCD1), transcript variant 4, mRNA [NM_031444]	AGGCAGGATGTAAGACACACTGTGTTGCATTCTTGCACAAGTCATGAAAATGGAGCCAGA
A_24_P408047	0.017447932	5.714018E-4	up	2.8965836	PLEKHA4	Homo sapiens pleckstrin homology domain containing, family A (phosphoinositide binding specific) member 4 (PLEKHA4), transcript variant 1, mRNA [NM_020904]	CTATGGCCAAAGTTTGGTTTTCTCAACACTGTCTAAATTTGGATTAAAACTTTGAACTTT
A_19_P00320140	0.0022536234	8.972032E-6	down	-1.4838858	NR2F1-AS1	Homo sapiens NR2F1 antisense RNA 1 (NR2F1-AS1), long non-coding RNA [NR_015369]	CACTGTGTGCTGTCTGAGAAATGCATTGTGTAAGTGCTATTTCCATCTTATTAAATAAAC
A_23_P94103	0.0011879429	1.7325484E-6	down	-2.7208788	SCARA5	Homo sapiens scavenger receptor class A, member 5 (putative) (SCARA5), mRNA [NM_173833]	CAATATGCTTGCCACTCCTTAAATGTCCTAATGATGAGAAACTCTCTTTCTGACCAATTG
A_24_P168574	0.00719887	1.1862598E-4	up	1.3763471	GNAS	GNAS complex locus [Source:HGNC Symbol;Acc:4392] [ENST00000481768]	TAATATCCCTAGATGATGGCTACAGTTTCTCATCTTCCCGGCTATGTCCTATCACAATTT
A_21_P0014517	0.0039493167	3.383047E-5	down	-2.463665		PREDICTED: Homo sapiens sterile alpha motif domain containing 5 (SAMD5), transcript variant X1, mRNA [XM_005266976]	GAAGGCAGTGTTTGTATGATGGCACATCCAAATAAAAAGCAGGTCCTCCTTTTGGGACAG
A_23_P209200	0.009472134	1.913409E-4	down	-1.1039672	CCNE1	Homo sapiens cyclin E1 (CCNE1), mRNA [NM_001238]	GGGCTGCCCTCTCCACATTATCAGTTGACAGTGTACAATGCCTTTGATGAACTGTTTTGT
A_23_P66017	0.0140413055	3.8885916E-4	up	1.3840233	PRRT2	Homo sapiens proline-rich transmembrane protein 2 (PRRT2), transcript variant 1, mRNA [NM_145239]	AATTATTTTCTAAGATGATGGGGGAGGTTTGTTGCACGCGACAGCCCGCTGAGGAGGCGG
A_32_P47754	0.0014632412	3.21397E-6	up	1.8854108	SLC2A14	Homo sapiens solute carrier family 2 (facilitated glucose transporter), member 14 (SLC2A14), transcript variant 1, mRNA [NM_001286233]	TTCACGTCAACTTCTGGCTCCTCAGTTTGGCAGTAAGGCAGGGAAGTTGTTTTCCTATTT
A_23_P202156	0.0050779954	6.17498E-5	up	1.554629	NFKB2	Homo sapiens nuclear factor of kappa light polypeptide gene enhancer in B-cells 2 (p49/p100) (NFKB2), transcript variant 4, mRNA [NM_001261403]	GGCCACACGCCTCTTGACCTCACTTGCAGCACCAAGGTGAAGACCTTGCTGCTAAATGCT
A_33_P3342528	0.0049662916	5.73572E-5	up	1.7531818	P2RY1	Homo sapiens purinergic receptor P2Y, G-protein coupled, 1 (P2RY1), mRNA [NM_002563]	TTACCTGAGTTCAAGCAGAATGGAGATACAAGCCTGTGAAGGCACAAGAATCTCCAAACA
A_23_P27381	0.012736736	3.305481E-4	down	-1.9810337	TSHZ1	Homo sapiens teashirt zinc finger homeobox 1 (TSHZ1), mRNA [NM_005786]	ATATTTATATGCTCTCTGTCCGATCTGTGCATGTTATTTTTCTTTTTCCGTGAGTCAAAG
A_23_P383986	0.004098543	3.760075E-5	up	1.7309816	CHST15	Homo sapiens carbohydrate (N-acetylgalactosamine 4-sulfate 6-O) sulfotransferase 15 (CHST15), transcript variant 1, mRNA [NM_015892]	ATTGAAGTTCCTTTTTGTTCTCAAAAGTTGTGACCGTGTTAAATTGTACTCCCTTAGTCC
A_24_P290286	0.018147191	6.175651E-4	down	-1.5368623	P4HA3	Homo sapiens prolyl 4-hydroxylase, alpha polypeptide III (P4HA3), mRNA [NM_182904]	GAATGCAGCACTGTTTTGGTGGAACCTGCACAGGAGTGGTGAAGGGGACAGTGACACACT
A_21_P0002250	0.013081767	3.478055E-4	up	1.309336	XLOC_001550	BROAD Institute lincRNA (XLOC_001550), lincRNA [TCONS_00003752]	AAGAGTCCGTATGCTGGAAAAGCACGTTGGGCCTTAAAGTTACATTTCATCCTACAAGCC
A_24_P942493	0.0041066953	3.7987687E-5	up	1.6017213	WSCD1	Homo sapiens WSC domain containing 1 (WSCD1), mRNA [NM_015253]	TTCGTCTGACTTCCTATTTATCACCACTCAATATTGGGTGAGTTGGTCTGAACAAGGTGG
A_23_P168567	0.015981967	4.8570512E-4	down	-1.1332713	GTF2I	Homo sapiens general transcription factor IIi (GTF2I), transcript variant 1, mRNA [NM_032999]	TCACAATGGAGAATTATATGACATGGTAGCAGAAATAGGCCCTTTTATGTGTTGCTTCTA
A_33_P3372426	0.010285228	2.3088501E-4	down	-1.617701	ADAMTS5	Homo sapiens ADAM metallopeptidase with thrombospondin type 1 motif, 5 (ADAMTS5), mRNA [NM_007038]	CTATGTGTGACTTTAAACTGTAAAATTAAACACTGCTTTTGTGGGTTCAGTGGGCATAAT
A_21_P0007089	0.00408114	3.675833E-5	up	1.469892	PPP2R2D	protein phosphatase 2, regulatory subunit B, delta [Source:HGNC Symbol;Acc:23732] [ENST00000455566]	GTCAACCCTGGTCCTTAAGACAGTTCTAGTAAAATGGGATTGTATATATTTGTTCAACTA
A_33_P3263232	0.010766568	2.4820713E-4	up	1.344386	LRRC3	Homo sapiens leucine rich repeat containing 3 (LRRC3), mRNA [NM_030891]	TGTACATTGTGTGTGGACTGAAGTGTAGGTATGTAGAGATGCTTCGCCAAACAGATGCTT
A_24_P54131	0.0137289455	3.7448236E-4	down	-1.262247	DCLRE1B	Homo sapiens DNA cross-link repair 1B (DCLRE1B), mRNA [NM_022836]	TCCAGGGGATTTAAAAGAGTTTTCTGCTTTGAGAGAGAAATAGAGAGTTTAGAAAGCAAT
A_23_P48217	0.012744533	3.3105293E-4	down	-2.4885266	APOLD1	Homo sapiens apolipoprotein L domain containing 1 (APOLD1), transcript variant 2, mRNA [NM_030817]	GAGTGGTTGTAGAAGTCTCCCTAAATCAGACATGTCAAGCAATCAGCCAACGTGGTGTAT
A_21_P0008829	0.016819429	5.363495E-4	up	1.575277		Homo sapiens cDNA FLJ32201 fis, clone PLACE6002949. [AK056763]	TCTCACAACTTGCCTTGCCTGACCTCTGGAGAAAAACTTCAGAAAATATCACCCTTTCTT
A_23_P88119	0.0042597814	4.2386597E-5	up	1.2731982	HSPH1	Homo sapiens heat shock 105kDa/110kDa protein 1 (HSPH1), transcript variant 1, mRNA [NM_006644]	TGTGGAATGGAAGAAATGTCGATCCTGTTGTAACTGATTGTGAACACTTTTATGAGCTTT
A_23_P91850	0.011232127	2.643166E-4	up	1.450291	IL20RB	Homo sapiens interleukin 20 receptor beta (IL20RB), mRNA [NM_144717]	TATGTGTGCAATGCGACGAGAATGCAGAAGTCAGTAACATGTGCATGTTTGTTGTGCTCC
A_33_P3245218	0.009339425	1.8501606E-4	up	1.8299491	TENM2	Homo sapiens teneurin transmembrane protein 2 (TENM2), mRNA [NM_001122679]	AGCTTGCAGACAGTAGCAGCAACATCCAGTTTTTAAGACAGAATGAGATGGGAAAGAGGT
A_24_P306726	0.00644371	9.742908E-5	down	-1.126979	TPT1	Homo sapiens tumor protein, translationally-controlled 1 (TPT1), transcript variant 2, mRNA [NM_003295]	GACCAGAAACAGTAAAACCTTTTATGACAGGGGCTGCAAAACAAATCAAGGACATCCTTG
A_24_P381029	0.010398697	2.352767E-4	up	1.2307683	GLRX3	Homo sapiens glutaredoxin 3 (GLRX3), transcript variant 2, mRNA [NM_006541]	GTGAATTGCTGCCTATACTGAGAGGAGAAAATTAATAAATCTTAAACTTGGTGCCCAACT
A_23_P21673	0.004659229	4.922869E-5	down	-1.2387884	FOCAD	Homo sapiens focadhesin (FOCAD), mRNA [NM_017794]	GAGTGCATTGCTTTAGTACCCGGGCCAGTTGAGACTGAAACAGGAACTTGGATTTTCTTT
A_23_P73345	0.0140413055	3.893675E-4	up	1.4582038	MITF	Homo sapiens microphthalmia-associated transcription factor (MITF), transcript variant 1, mRNA [NM_198159]	ACATACAGCAAGCCCAACGGCAGCAGGTAAAGCAGTACCTTTCTACCACTTTAGCAAATA
A_23_P32404	0.0057010534	7.768532E-5	up	1.6085565	ISG20	Homo sapiens interferon stimulated exonuclease gene 20kDa (ISG20), mRNA [NM_002201]	CAGGGACTAGAGGCTTTCGGCTTTTTGGGACAGCAACTACCTTGCTTTTGGAAAATACAT
A_23_P323924	0.0128173735	3.342878E-4	up	1.276819	ZFYVE27	Homo sapiens zinc finger, FYVE domain containing 27 (ZFYVE27), transcript variant 1, mRNA [NM_001002261]	AGAGTTCAGTACCCCGTGCTTTCTTTACACTGGAGAGGAACTAAAAGGATCTCTGTGTCT
A_21_P0010854	0.012853952	3.3662777E-4	down	-2.5129235	AKR1CL1	Homo sapiens aldo-keto reductase family 1, member C-like 1 (AKR1CL1), non-coding RNA [NR_027916]	TTAACCAAGTCCATCGGGGTGTCCAATTTCAATCACAAACTGCTGGAACTCATCCTCAAC
A_33_P3240507	0.015514253	4.6040717E-4	down	-1.7764659	KCTD12	Homo sapiens potassium channel tetramerization domain containing 12 (KCTD12), mRNA [NM_138444]	CAGAGGCATGCATTTACATATGTTGCCCTAATTACCATTTGATGATCATAAATACAAGTG
A_23_P215341	0.010133533	2.2128844E-4	down	-1.3826352	FKBP14	Homo sapiens FK506 binding protein 14, 22 kDa (FKBP14), transcript variant 1, mRNA [NM_017946]	TCTGCTTGAGGACCAGAGGAAAATGGTTGTTGGACCTGACTTGTTAATGGCTACTGCTTT
A_23_P123193	0.00719887	1.187539E-4	down	-1.4838467	ACTR3B	Homo sapiens ARP3 actin-related protein 3 homolog B (yeast) (ACTR3B), transcript variant 1, mRNA [NM_020445]	ATAGAAGATGATGGTTTGTTGTCGGTGAGTGTTGGATGAAATACTTCCTTGCACCATTGT
A_23_P350555	0.011078728	2.5874167E-4	up	1.590017	TCP10L	Homo sapiens t-complex 10-like (TCP10L), mRNA [NM_144659]	GACACCTGTGTCACTCTACACTGGCCCCTTGGAAAATTCAGATTCAGATAAAGTTCCACT
A_23_P56746	0.005808511	8.002028E-5	down	-6.4878654	FAP	Homo sapiens fibroblast activation protein, alpha (FAP), mRNA [NM_004460]	TTTCTGGTACTCTGTGAAAGAAGAGAAAAGGGAGTCATGCATTTTGCTTTGGACACAGTG
A_32_P302205	0.010133533	2.20535E-4	up	1.6786008	SI	Homo sapiens sucrase-isomaltase (alpha-glucosidase) (SI), mRNA [NM_001041]	GCAGTTACTCTAACGTATAACGGAAATAAAAATTCGCTTCCTTTTAATGAAGACACTACC
A_23_P60130	0.0015354342	3.8740313E-6	up	1.8583145	MAL2	Homo sapiens mal, T-cell differentiation protein 2 (gene/pseudogene) (MAL2), mRNA [NM_052886]	CTAGAATTTAGGTGTGAGATTTTTTGTTTCCCAGGTATAGCAGGCTTATGTTTGGTGGCA
A_33_P3293266	0.004098543	3.7657388E-5	down	-1.322145	TMEM175	Homo sapiens transmembrane protein 175 (TMEM175), mRNA [NM_032326]	GTTCTTGCGTGGCCTGGTTTTATTTTCATTGTGAAATATCATGCTCTTATTTCAGTCCTC
A_21_P0000492	0.0030109102	1.8395755E-5	up	1.8145125	SNAR-F	Homo sapiens small ILF3/NF90-associated RNA F (SNAR-F), small nuclear RNA [NR_004384]	AGGCGAGGGTGTGAGGGTACAGAGTTCGAGGCCAACTTGGTCCACATTGGTAGGAAAAAA
A_33_P3300217	8.9715177E-4	9.4004946E-7	down	-2.7591248	MYLK3	Homo sapiens myosin light chain kinase 3 (MYLK3), mRNA [NM_182493]	GTCTAGGTGATGTGTATGGGTTTCATTATACTGTCCTCTTTACTGTTGTATGTATTTGAA
A_24_P206624	0.014597032	4.1484696E-4	up	1.4185544	FGFR2	Homo sapiens fibroblast growth factor receptor 2 (FGFR2), transcript variant 2, mRNA [NM_022970]	AGAGACCAACGTTCAAGCAGTTGGTAGAAGACTTGGATCGAATTCTCACTCTCACAACCA
A_33_P3237775	0.0029355057	1.7125085E-5	down	-1.2392044	NR1H3	Homo sapiens nuclear receptor subfamily 1, group H, member 3 (NR1H3), transcript variant 1, mRNA [NM_005693]	TCTGAGATCTGGGATGTGCACGAATGACTGTTCTGTCCCCATATTTTCTGTTTTCTTGGC
A_33_P3302165	0.0045640813	4.7854533E-5	up	1.2360517	ABHD8	Homo sapiens abhydrolase domain containing 8 (ABHD8), mRNA [NM_024527]	CTGGCGCCACCGAACCTGCACATCTCAACTTGTAACTCAATAAACAGAAGTGACAATCGG
A_33_P3308105	0.011244207	2.6504407E-4	down	-1.170875	GGH	Homo sapiens gamma-glutamyl hydrolase (conjugase, folylpolygammaglutamyl hydrolase) (GGH), mRNA [NM_003878]	CACAGATTCTTTTCTATAATGTGCCTGGCTCTGATTCTTCATTCTGTATGTGACTATTTA
A_33_P3222380	0.002060766	6.893766E-6	up	1.64801	AHNAK2	Homo sapiens AHNAK nucleoprotein 2 (AHNAK2), mRNA [NM_138420]	AAAGGGCACCTGCCCAAGGTGGAGATGCCCAGTTTCAAGATGCCCAAAGTGGACCTCAAG
A_19_P00315506	0.019776354	7.0664636E-4	down	-1.1687518	KIAA0040	Homo sapiens KIAA0040 (KIAA0040), transcript variant 1, mRNA [NM_001162893]	CAATGGATTCCATGTTTCTTTTTCTTGGGGGGAGCAGGGAGGGAGAAAGGTAGAAAAATG
A_23_P160618	0.018036911	6.0936454E-4	down	-1.2858725	SH2D2A	Homo sapiens SH2 domain containing 2A (SH2D2A), transcript variant 2, mRNA [NM_003975]	AGTGTGCAAGGAGGGCCCTGTTAGCTCCCACTGTCCTGGTTTCTCCTCCTGGAGTCTAAT
A_23_P43226	0.019188697	6.716554E-4	down	-1.3235846	KCTD9	Homo sapiens potassium channel tetramerization domain containing 9 (KCTD9), mRNA [NM_017634]	AGGGTACATATGCATAGTGGGAGGAGATCAGACCTTTACAAGTGAAGGAAAGCAACTTCA
A_23_P75741	0.004889925	5.445136E-5	up	2.1961002	UBE2L6	Homo sapiens ubiquitin-conjugating enzyme E2L 6 (UBE2L6), transcript variant 2, mRNA [NM_198183]	AATAGACCGAATATCAGGGAGCCCCTGCGGATGGACCTCGCTGACCTGCTGACACAGAAT
A_33_P3349646	0.0014120501	2.699479E-6	down	-1.5394465	PCDH7	Homo sapiens protocadherin 7 (PCDH7), transcript variant a, mRNA [NM_002589]	ATTGGATCAGATCACTGCTCTGAGTACAGCTGTCAAACCAATAACAAGTACAGCAAACAG
A_33_P3314643	0.011406713	2.726415E-4	up	1.3325315	SPEF1	Homo sapiens sperm flagellar 1 (SPEF1), mRNA [NM_015417]	AGGCGGAAGGTTTGAAGGTTACGGCTCAGGGCTGCCCCATTAAAGTCAGTGTTGTGTTCT
A_23_P63026	0.00418634	4.0428597E-5	up	1.5448892	LGALS8	Homo sapiens lectin, galactoside-binding, soluble, 8 (LGALS8), transcript variant 1, mRNA [NM_006499]	TGATAATTTACTGTGATGTTAGAGAATTCAAGGTTGCAGTAAATGGCGTACACAGCCTGG
A_33_P3423700	0.004000943	3.540518E-5	down	-1.7360604	LOC100131829	Homo sapiens cDNA FLJ42008 fis, clone SPLEN2031724. [AK124002]	CTCCATTTTAGGAGGCAGAGTTAAAACATTTTCCTCCTGTGGATGTCTGATTAGAAAAAA
A_33_P3279959	0.015328658	4.4969615E-4	down	-5.8741903	PLXNA4	Homo sapiens plexin A4 (PLXNA4), transcript variant 3, mRNA [NM_001105543]	GCCAATCTTGTAACTGATTCTTGTGTGATAACATTCAGTGAAAAAGCATGAGACAATTAG
A_23_P61810	0.01632158	5.085717E-4	up	1.3517442	BAIAP2	Homo sapiens BAI1-associated protein 2 (BAIAP2), transcript variant 1, mRNA [NM_017450]	TTCCCGCTCCGCTAAAGATTTCAAATCCAGGGGATTCCATGCTCAATGGATGAATGTAGA
A_23_P344451	0.0026387959	1.31578345E-5	up	1.6788789	HDGFRP3	Homo sapiens hepatoma-derived growth factor, related protein 3 (HDGFRP3), mRNA [NM_016073]	AGGTGGATACTTTACATTTTAAAGCTGGAATCAGCAACAGCCCTATGGGAAACCAGACAA
A_23_P398854	0.0066274516	1.03606784E-4	down	-3.4193041	DOK7	Homo sapiens docking protein 7 (DOK7), transcript variant 1, mRNA [NM_173660]	TGTCAGCTGTTTCTAAACCCAGACACTGTTTGTAATAGACTGGAAATAAAATGTTCTTTC
A_23_P143906	0.014666192	4.1771628E-4	up	1.2161927	MLF1	Homo sapiens myeloid leukemia factor 1 (MLF1), transcript variant 1, mRNA [NM_022443]	ACATGGAAGGAGATCAAATGTTTTGGGGGACAAACTCCACATCAAAGGCTCATCTGTGAA
A_23_P48175	0.0062720766	9.209281E-5	up	1.2683073	TMEM106C	Homo sapiens transmembrane protein 106C (TMEM106C), transcript variant 2, mRNA [NM_024056]	TTTTTACCAAGAGTCTATGTGGGGCTTGATTCACCCTTCATCCATTGGCTGGAACATGGA
A_32_P209230	8.903381E-4	6.0021426E-7	down	-2.6397502	CITED4	Homo sapiens Cbp/p300-interacting transactivator, with Glu/Asp-rich carboxy-terminal domain, 4 (CITED4), mRNA [NM_133467]	ACAGCCCGAACCCGTGGAGCAATGCCCTGTCTGGCCTCCAAAACCAAAATAAAACTGGGT
A_33_P3239338	0.007107877	1.1653939E-4	up	1.2540241	DGKZ	Homo sapiens diacylglycerol kinase, zeta (DGKZ), transcript variant 4, mRNA [NM_001105540]	GGCGGGACTCTCACGGTGACATGTTTACAGCTGGGTGTGACTCAGTAAAGTGGATTTTTT
A_23_P86330	0.009568285	1.948016E-4	up	1.2536855	IER5	Homo sapiens immediate early response 5 (IER5), mRNA [NM_016545]	ATGGTGACTCCAGTCTTTGTTGTATAAAGGTTGGGGGAGCTGATAAGGTTTTTGTACAGT
A_24_P206776	0.012048915	2.9784226E-4	up	1.2180531	CRYAB	Homo sapiens crystallin, alpha B (CRYAB), mRNA [NM_001885]	TGTAGACCCTCTCACCATTACTTCATCCCTGTCATCTGATGGGGTCCTCACTGTGAATGG
A_24_P286114	0.014893054	4.2766274E-4	down	-1.8092573	SLC1A3	Homo sapiens solute carrier family 1 (glial high affinity glutamate transporter), member 3 (SLC1A3), transcript variant 1, mRNA [NM_004172]	GTGGCTGTCCTCTTAAGACACTAGTAGAGCAAAGACTTAATCATATCAACTTAATTCTGT
A_32_P131367	0.0065931086	1.0252395E-4	up	1.3330672	RNF13	Homo sapiens ring finger protein 13 (RNF13), transcript variant 1, mRNA [NM_007282]	CTGTCTCATCTTGATAGTCATTTTCATGATCACAAAATTTTTCCAGGATAGACATAGAGC
A_24_P26897	0.016029868	4.89873E-4	up	1.3032461	INPP5A	Homo sapiens inositol polyphosphate-5-phosphatase, 40kDa (INPP5A), mRNA [NM_005539]	ATGGTGCCAAGTATCCTACGTTACAACAATAATATCATGGGAGAAATAGAAATAGCCTAG
A_23_P38732	0.007821152	1.37343E-4	up	1.4141288	CDH2	Homo sapiens cadherin 2, type 1, N-cadherin (neuronal) (CDH2), mRNA [NM_001792]	ATGTATGGTGGAGGTGATGACTGAACTTCAGGGTGAACTTGGTTTTTGGACAAGTACAAA
A_23_P166400	0.009871443	2.0557098E-4	up	2.0078206	RASL10A	Homo sapiens RAS-like, family 10, member A (RASL10A), mRNA [NM_006477]	AAAGGACTTGGCTATGAACTTGACTGGAAACACGCAGCCTGCTCCTGGAGCTTCACTGGA
A_23_P140256	0.015220706	4.425417E-4	up	1.1498771	PNP	Homo sapiens purine nucleoside phosphorylase (PNP), mRNA [NM_000270]	CTACTAGCTCTTTGAGATAATACATTCCGAGGGGCTCAGTTCTGCCTTATCTAAATCACC
A_24_P382187	0.002060766	7.0792694E-6	down	-1.5581441	IGFBP4	Homo sapiens insulin-like growth factor binding protein 4 (IGFBP4), mRNA [NM_001552]	GAAAAATCTCATTCCCAGAGTCAGAGGAGAAGAGACATGTACCTTGACCATCGTCCTTCC
A_23_P255376	0.0145165175	4.1084213E-4	up	1.4451563	CCDC109B	Homo sapiens coiled-coil domain containing 109B (CCDC109B), mRNA [NM_017918]	CTTCATCACATTTGCAAATTCTATGGTCTTTTTTGCATACTTTATAGTCACTCGACAGGA
A_24_P256063	0.008165452	1.4901347E-4	up	1.4488319			CTCAGGACCATTCCAAGATCATGGCAGACATCCAGGCCCAATATAACGAGCTGTCTCGGA
A_23_P431933	0.007234886	1.1963321E-4	up	1.4676495	CAMKK1	Homo sapiens calcium/calmodulin-dependent protein kinase kinase 1, alpha (CAMKK1), transcript variant 1, mRNA [NM_032294]	GCCCGAAGCTTAAAAAGTTACTCGGTACTGTTTTTAAGAACACTTTTATAGAGTTAGTGG
A_23_P127915	0.007941147	1.4164131E-4	up	1.3383124	STK33	Homo sapiens serine/threonine kinase 33 (STK33), mRNA [NM_030906]	ATGTTTAGGCACAGCTATTTATAGGGGAAAACAAGAGGCCAAATATAGTAATGGAGGTGC
A_33_P3242798	0.012974241	3.4262697E-4	down	-1.2714429	CPS1	Homo sapiens carbamoyl-phosphate synthase 1, mitochondrial (CPS1), transcript variant 2, mRNA [NM_001875]	CCCAAGGGCAGCCTTTGTTACTTTTAAATATTTTCTGTTATTACAAGTGCTCTAATTGTG
A_23_P500601	0.00432865	4.3544776E-5	down	-1.3825152	TRIM4	Homo sapiens tripartite motif containing 4 (TRIM4), transcript variant alpha, mRNA [NM_033017]	TCTACCCTTCTGCTCTAGATTGTCTGGACTCAGGAGATTGTGGCAGTTACTGGATAGTTA
A_24_P296508	0.016360553	5.1075337E-4	up	1.2944032	SLC43A2	Homo sapiens solute carrier family 43 (amino acid system L transporter), member 2 (SLC43A2), transcript variant 2, mRNA [NM_152346]	TATTTTCTCTTCAGTTTTATTAGACTTCTTTTTTATAAAGCAATAAATCCATTTTCCTCC
A_23_P429184	0.0028768918	1.6170618E-5	up	1.2657397	GNPNAT1	Homo sapiens glucosamine-phosphate N-acetyltransferase 1 (GNPNAT1), mRNA [NM_198066]	GCACAGTATGCAGGTAGGCCTAATGGGGGAAGATGGTAATATAAAAGCAAGAAGTATTTT
A_33_P3221980	0.009871443	2.0613408E-4	up	2.5962539			GAGAGCTACATCAACAACCTTAGGCGGCAGCTGAAGCACTCTTCTTTTAAAAGTTTCTGA
A_33_P3304668	0.01267774	3.2758593E-4	up	1.5219284	COL1A1	Homo sapiens collagen, type I, alpha 1 (COL1A1), mRNA [NM_000088]	GGTGGGAGGAAGCAAAAGACTCTGTACCTATTTTGTATGTGTATAATAATTTGAGATGTT
A_33_P3360728	0.010642737	2.4436408E-4	down	-1.2607603	BLVRB	Homo sapiens biliverdin reductase B (flavin reductase (NADPH)) (BLVRB), mRNA [NM_000713]	ACATGAGGAGCAAAGGAAGGGGGCAATAAATGTTGAGCCAAGAGCTTCAAATTACTCTAG
A_24_P173754	0.0010502836	1.4227938E-6	down	-3.7145345	C1orf21	Homo sapiens chromosome 1 open reading frame 21 (C1orf21), mRNA [NM_030806]	AAAGCCAACAAGAATTCTTCAGAATGCTGGATGAAAAAATTGAAAAGGGTCGGGATTACT
A_33_P3399318	0.013077395	3.471738E-4	down	-1.4089972	GNG12	Homo sapiens guanine nucleotide binding protein (G protein), gamma 12 (GNG12), mRNA [NM_018841]	GTCAGTGCCTCATTGTATCATCCTACTTGTGTTTTGCTCAATAAATGAATAAAAGACCAT
A_23_P202269	0.0128173735	3.3521856E-4	up	2.1426973	ANK3	Homo sapiens ankyrin 3, node of Ranvier (ankyrin G) (ANK3), transcript variant 1, mRNA [NM_020987]	GTGTCATATTAGGTTAATAAGGCTGCTGTGTTTTAAAGGGCATTTTTATTTGGGTTTTGG
A_23_P203267	0.0028768918	1.6251633E-5	up	2.2341719	TRIM29	Homo sapiens tripartite motif containing 29 (TRIM29), mRNA [NM_012101]	TACCATTTACCATTTGCCTACAGAATTTCATTCAGTCTACACTTTGGCATTCTCTCTGGC
A_33_P3719083	0.0028768918	1.6480382E-5	up	1.3603903	CHRFAM7A	Homo sapiens CHRNA7 (cholinergic receptor, nicotinic, alpha 7, exons 5-10) and FAM7A (family with sequence similarity 7A, exons A-E) fusion (CHRFAM7A), transcript variant 1, mRNA [NM_139320]	CCCAACTTCGTGGAGGCCGTGTCCAAAGACTTTGCGTAACCACGCCTGGTTCTGTACATG
A_33_P3346866	0.0031897814	2.0054402E-5	up	1.1665548	KANSL2	Homo sapiens KAT8 regulatory NSL complex subunit 2 (KANSL2), mRNA [NM_017822]	GGTCCTCCTTATCCGTCTTGCTTTTAACCTATGTAAATTTCTGTGGTTGCTATCTTATGT
A_21_P0011307	0.0046268855	4.869542E-5	up	1.9020652	GOLGA8R	golgin A8 family, member N [Source:HGNC Symbol;Acc:44405] [ENST00000567075]	TCCGTAAAAATCAGTCGACTGAAGAACACCATCAAATCTTTGGTAAGAGTCCGGTGGGGT
A_23_P115375	0.0014014348	2.5410827E-6	up	1.0640451	HIST2H3D	Homo sapiens histone cluster 2, H3d (HIST2H3D), mRNA [NM_001123375]	TGGTGGGGCTGTTCGAAGACACGAACCTGTGCGCCATCCATGCCAAGCGCGTGACCATCA
A_33_P3303430	0.009602833	1.9680506E-4	up	1.6259109		Q8IWY7_HUMAN (Q8IWY7) Tau-tubulin kinase, partial (6%) [THC2536940]	GCATGGGCTCCATCTCCTTCAGCCACACCAGCTTCACCAGGGCCATAGTTGTGAAGAAGA
A_23_P162142	0.0033736592	2.2086546E-5	down	-1.3004181	TSKU	Homo sapiens tsukushi, small leucine rich proteoglycan (TSKU), transcript variant 1, mRNA [NM_015516]	CCTGGGCTGTTTCCTTAGTCTTCATTTTATAAAAGTTGTTGCCTTTTTAACGGAGTGTCA
A_33_P3226395	0.0024237537	1.0666988E-5	up	6.748858	LINC00937	Homo sapiens long intergenic non-protein coding RNA 937 (LINC00937), long non-coding RNA [NR_024420]	CTCTGGAAAGTGGTGGTAGTTCCAGATTTATGTGAATGTTACTTTGTTTTTCCCTATAAA
A_24_P323598	0.0020907004	7.49931E-6	down	-1.2233891	ESCO2	Homo sapiens establishment of sister chromatid cohesion N-acetyltransferase 2 (ESCO2), mRNA [NM_001017420]	ATTGTTTTGATTCTGAAAAATCATTCAACTGCTAACTGGCAATAAGACTCTAGGCAAGTC
A_33_P3620246	0.019784823	7.085087E-4	up	1.7098202		Homo sapiens cDNA FLJ59077 complete cds, highly similar to Golgin subfamily A member 6. [AK302879]	AGTGAAGATGAAAAAGAAAAACACTGGCAGTAGCCCTGAGACAGCCACTTTTGGTGGTTG
A_23_P167096	0.010186542	2.2390806E-4	down	-1.2503449	VEGFC	Homo sapiens vascular endothelial growth factor C (VEGFC), mRNA [NM_005429]	TTTCTGCCAATGACCAAACAGCCAAGATTTTCCTCTTGTGATTTCTTTAAAAGAATGACT
A_23_P147199	0.008451211	1.569785E-4	down	-1.2281251	ZNF271	Homo sapiens zinc finger protein 271 (ZNF271), transcript variant 1, non-coding RNA [NR_024565]	AGAAACCCTACCAGTGTGTTCAGTGCAGCAGAAGTTGTAGCCAACTCTCTGAACTTACTA
A_23_P67453	0.004098543	3.756124E-5	up	3.2321272	TNNI3	Homo sapiens troponin I type 3 (cardiac) (TNNI3), mRNA [NM_000363]	CAGATCTGACTCAGAAGATCTTTGACCTTCGAGGCAAGTTTAAGCGGCCCACCCTGCGGA
A_24_P923251	0.010307133	2.321893E-4	down	-1.7665209	TGM2	Homo sapiens transglutaminase 2 (TGM2), transcript variant 2, mRNA [NM_198951]	TGTGTTCCTGGAGCATTTGTTGACCGCCAACTGACATCATGCTAGGTAGTGACCTAACCA
A_33_P3269218	0.013426618	3.6147263E-4	up	1.344654	BAI2	Homo sapiens brain-specific angiogenesis inhibitor 2 (BAI2), mRNA [NM_001703]	CCTGTCCCGGGCTGGGGAGGGGGGAGGGGAACTTTGTTGGGAATAAACTTCACTCTGTGG
A_33_P3286046	0.006059424	8.754926E-5	up	1.2218665	DPCD	Homo sapiens deleted in primary ciliary dyskinesia homolog (mouse) (DPCD), mRNA [NM_015448]	TCTATAGTGTCTCTGTGGACCAGAAGGAGCGCTGCATCATTGTCAGAACAACCAACAAGA
A_33_P3231981	0.010285046	2.3064468E-4	down	-1.161331	PARK7	Homo sapiens parkinson protein 7 (PARK7), transcript variant 1, mRNA [NM_007262]	TTCTTAAAGACTAGAGCAGCGAACTGCGACGATCACTTAGAGAAACAGGCCGTTAGGAAT
A_23_P34915	0.0049662916	5.733629E-5	up	1.5855333	ATF3	Homo sapiens activating transcription factor 3 (ATF3), transcript variant 4, mRNA [NM_001040619]	GATGTCAATAGCATTGTTTTTGTCATGTAGCTGTTTTAAGAAATCTGGCCCAGGGTGTTT
A_21_P0000360	0.019379498	6.806206E-4	up	1.2538065	SNORA77	Homo sapiens small nucleolar RNA, H/ACA box 77 (SNORA77), small nucleolar RNA [NR_003019]	TTTCTGTCTGCCAGAGAAACATTCCAGGGTGCTGTGGCTGCCTCACCTATCCAGGGCGAT
A_33_P3246885	0.0029592963	1.7438846E-5	up	2.3891819	DMKN	Homo sapiens dermokine (DMKN), transcript variant 9, mRNA [NM_001190348]	TTAAAACACCACCCTCTCATCACTAATCTCAGCCCTTGCCCTTGAAATAAACCTTAGCTG
A_19_P00804767	0.016439406	5.1546184E-4	up	1.1503937	BMPR1A	Homo sapiens bone morphogenetic protein receptor, type IA (BMPR1A), mRNA [NM_004329]	CTTTGCAAGTGAGATAGCTTCCCCACCAGCTTTATTTTTTAACATGAAAGCTGATGCCAA
A_33_P3260100	0.0051177577	6.263173E-5	down	-1.2900434	CCDC167	Homo sapiens coiled-coil domain containing 167 (CCDC167), mRNA [NM_138493]	AGGACATGGTGCTGGTCCCTCCCTTAGCCCAAGGGAGAGGCAATAAAGAACACAAAGCTG
A_23_P369994	0.017245319	5.6182645E-4	up	2.0684915	DCLK1	Homo sapiens doublecortin-like kinase 1 (DCLK1), transcript variant 1, mRNA [NM_004734]	AAATGTTTTTACCGTAGCCCTCATCTAACTTACACGTGGTGCATATTAAAATAAGCAGAG
A_33_P3263756	0.017245319	5.618115E-4	down	-1.2261119	ZNF446	Homo sapiens zinc finger protein 446 (ZNF446), mRNA [NM_017908]	TTGGCTTCCGTTTCTCCTGCTCCCTGTGTGTGTTAGAATTTTAACATAAATTCCACTTTC
A_23_P157865	0.011063383	2.5816524E-4	down	-1.4054723	TNC	Homo sapiens tenascin C (TNC), mRNA [NM_002160]	CAATACAACCAGCCCAACCATCGGTCCACACCTGGGCATTTGGTGAGAATCAAAGCTGAC
A_23_P404667	0.0075632883	1.2983354E-4	up	3.8548286	BIK	Homo sapiens BCL2-interacting killer (apoptosis-inducing) (BIK), mRNA [NM_001197]	TTTTCGTTTTTTCTAAAAGATGAATTCCTATGGCTCTGCAATTGTCACCGGTTAACTGTG
A_23_P253896	0.002701735	1.3791154E-5	up	1.8233908	NPNT	Homo sapiens nephronectin (NPNT), transcript variant 2, mRNA [NM_001033047]	AGTTTCTCTTATCAATTGGACTCTCCCAGGTTCCACAGAACAGTAATATTTTTTGAACAA
A_23_P72912	0.009889119	2.0916344E-4	up	4.2626076	SLC4A8	solute carrier family 4, sodium bicarbonate cotransporter, member 8 [Source:HGNC Symbol;Acc:11034] [ENST00000551071]	GAATCCCGAGGGTTATATTTAGGAGCTGGGAAGATTACCCCCAAAGATGTTCTCAGCTAA
A_33_P3340199	0.013462764	3.6377244E-4	down	-2.632963			CAGGACTACCCAACTACACTTTGCCTAAATTCCTGATTCACAGAATTATAAGCAAATAAA
A_23_P159390	0.0077662	1.3563456E-4	up	1.297871	TOPBP1	Homo sapiens topoisomerase (DNA) II binding protein 1 (TOPBP1), mRNA [NM_007027]	GAAGTAGTTCCATACTTGATGTTCTGACTGGAATCAATGTACAGCAACGAAGACTAGCAC
A_23_P302568	0.0049071717	5.532582E-5	up	1.5342187	SLC30A3	Homo sapiens solute carrier family 30 (zinc transporter), member 3 (SLC30A3), mRNA [NM_003459]	TGTCTCTGTGCCTATGTGGCTGTGCTATGGTTTCTATGAGTCTGCTCCATCCATGTGTCT
A_23_P68087	0.004111762	3.8323047E-5	down	-1.1226946	ATIC	Homo sapiens 5-aminoimidazole-4-carboxamide ribonucleotide formyltransferase/IMP cyclohydrolase (ATIC), mRNA [NM_004044]	GCAGAGAAGAAGGAATGGGTTGAGAAACTGACTGAAGTTTCTATCAGCTCTGATGCCTTC
A_23_P412577	0.0073094717	1.219844E-4	down	-3.8075647	ANKRD29	Homo sapiens ankyrin repeat domain 29 (ANKRD29), mRNA [NM_173505]	TAAACCACGAGAAATATATAGGCTTGTCTCTTTGGTCTTTTATTTTGGCTCTATTGTTGG
A_23_P351215	0.012405712	3.146722E-4	up	1.4987252	SKIL	Homo sapiens SKI-like oncogene (SKIL), transcript variant 1, mRNA [NM_005414]	AGAACTCCAAGATGAACTCAGACAGGAACGGGAAGCAAGACAGAAGTTAGAGATGATGAT
A_32_P2452	0.0015355358	3.9495794E-6	down	-2.1586144	TMTC1	Homo sapiens transmembrane and tetratricopeptide repeat containing 1 (TMTC1), transcript variant 2, mRNA [NM_175861]	GTACATTTTTGTTACTTTGGCTGTGCCCGTTAGAATTTATCTTCCATAAAGTATTTCTCC
A_23_P111000	0.018915609	6.583686E-4	up	1.2662847	PSMB9	Homo sapiens proteasome (prosome, macropain) subunit, beta type, 9 (PSMB9), mRNA [NM_002800]	ACCATCATGGCAGTGGAGTTTGACGGGGGCGTTGTGATGGGTTCTGATTCCCGAGTGTCT
A_23_P331895	0.00887374	1.6886469E-4	down	-1.6279058	TTYH3	Homo sapiens tweety family member 3 (TTYH3), mRNA [NM_025250]	TTGTTCTGAGTTTTCGGTGCCGTGTTCCTAACTACTCCATCCCATGACCTCGCCACACCT
A_23_P121374	0.006046977	8.702242E-5	up	4.450038	SEMA5B	Homo sapiens sema domain, seven thrombospondin repeats (type 1 and type 1-like), transmembrane domain (TM) and short cytoplasmic domain, (semaphorin) 5B (SEMA5B), transcript variant 1, mRNA [NM_001031702]	TCTGTGCCTCTATGGAGACTATCTTCCAGTTGCTGCTCAACAGAGTTGTTGGCTGAGACC
A_23_P409438	0.0063972296	9.604121E-5	down	-1.8522455	IFNL2	Homo sapiens interferon, lambda 2 (IFNL2), mRNA [NM_172138]	TGGGGACCTGTGTGTCTGACCCTCCCACCAGTCATGCAACCTGAGATTTTATTTATAAAT
A_23_P27332	0.0020299384	6.7013975E-6	up	1.7390822	TCF4	Homo sapiens transcription factor 4 (TCF4), transcript variant 2, mRNA [NM_003199]	AGACGCATCGAATCACATGGGACAGATGTAAAAGGGTCCAAGTTGCCACATTGCTTCATT
A_24_P261417	0.010662024	2.452272E-4	up	1.5949535	DKK3	Homo sapiens dickkopf WNT signaling pathway inhibitor 3 (DKK3), transcript variant 1, mRNA [NM_015881]	GGTAATTGTAGGGCGAGGATTATAAATGAAATTTGCAAAATCACTTAGCAGCAACTGAAG
A_32_P119616	0.01618366	4.982139E-4	down	-1.1484787	ETFA	Homo sapiens electron-transfer-flavoprotein, alpha polypeptide (ETFA), transcript variant 1, mRNA [NM_000126]	GGCCTACTTCCAGAGGAACTGACACCATTGATTTTGGCAACTCAGAAGCAGTTCAATTAC
A_33_P3424297	0.0050779954	6.158189E-5	up	1.2866969	SELT	Homo sapiens selenoprotein T (SELT), mRNA [NM_016275]	GGTCACCTTCCATCCATGCAACAACTTGTTCAAATTCTTGACAATGAAATGAAGCTCAAT
A_23_P163227	0.0014145512	2.8763561E-6	up	1.8769957	CKMT1A	Homo sapiens creatine kinase, mitochondrial 1A (CKMT1A), mRNA [NM_001015001]	CATTAACTCCCCATCGCCAGCTGATGACTCAAGATTCCAAGGAGTTCTGCTCATTCTAAT
A_23_P105307	0.015987815	4.8682815E-4	up	1.5169088	DGKA	Homo sapiens diacylglycerol kinase, alpha 80kDa (DGKA), transcript variant 1, mRNA [NM_201444]	GGCTGGAGGGTGCAATTGAGATGGGCCAAATCTATACCAAGCTCAAGAATGCTGGACGTC
A_24_P207995	0.01072889	2.4697656E-4	up	1.4745939	L1CAM	Homo sapiens L1 cell adhesion molecule (L1CAM), transcript variant 1, mRNA [NM_000425]	GGCAGCGTGGATGTTCAGTTCAACGAGGATGGTTCGTTCATTGGCCAGTACAGTGGCAAG
A_23_P33613	0.015189417	4.3886725E-4	up	1.1965292	DCTPP1	Homo sapiens dCTP pyrophosphatase 1 (DCTPP1), mRNA [NM_024096]	TTGGGCGATAACTTCTAGATTATTCCTGGATGGCCAGGGAGGCTCTCTGTCTCAGCAGGT
A_33_P3391603	0.0065540266	1.0114119E-4	down	-1.4270952	LAMA4	Homo sapiens laminin, alpha 4 (LAMA4), transcript variant 5, mRNA [NM_001105209]	AGTTTCACCTGGGCTAGGTCAGTTCGGAAACTTGAAATAAAGAGTTTTCCTTTGTAAGTT
A_24_P220485	0.009081758	1.7755777E-4	up	1.4414271	OLFML2A	Homo sapiens olfactomedin-like 2A (OLFML2A), transcript variant 1, mRNA [NM_182487]	TCTAGCTTTCTGCTTTTACCTTTACCCTAATCTTTTTATTTTTATGCTATTGTACTTTAT
A_23_P26439	0.0058282875	8.105319E-5	up	1.705835	DBNDD1	Homo sapiens dysbindin (dystrobrevin binding protein 1) domain containing 1 (DBNDD1), transcript variant 1, mRNA [NM_001042610]	TTAGCTCAGAACACCAAATATCACCAGACTGCCTAAGAGACTTGATGACACCTCCCGGAA
A_23_P332960	0.0038463078	3.1020412E-5	down	-1.3233452	TMEM80	Homo sapiens transmembrane protein 80 (TMEM80), transcript variant 2, mRNA [NM_001042463]	TCTAAGCTGTTACAGTAGCTTTCCCTTCACTTGATTCTATTGTGTGTTTTCTATGTTTGG
A_21_P0000304	0.019079836	6.6656526E-4	up	1.4215844	SNORA13	Homo sapiens small nucleolar RNA, H/ACA box 13 (SNORA13), small nucleolar RNA [NR_002922]	CAGCCTTTTCCTGCCCTTAAATTTGATACCTTTGGTGTAGGAGCTGCATAAGTAACAGTT
A_23_P78268	0.0155232	4.6105485E-4	up	1.2309153	GLOD4	Homo sapiens glyoxalase domain containing 4 (GLOD4), mRNA [NM_016080]	TAATCCCGACAGAACATCATGTGAGATTTCTTTAAAATGGATTAAACGATTTCTTCAGCC
A_23_P422212	0.007975827	1.4257425E-4	down	-1.3372105	SLC35F3	Homo sapiens solute carrier family 35, member F3 (SLC35F3), mRNA [NM_173508]	TGTAACCATGGAGTCTTCTGTTTCCTGGGGGAAAGGGGCATTCATGACCTGAACTTTTTA
A_33_P3294868	0.009339425	1.8554051E-4	down	-1.2725803	LINC00086	Homo sapiens long intergenic non-protein coding RNA 86 (LINC00086), long non-coding RNA [NR_024359]	ATGAACTTCCCCTACTTCTACATCGTGGCCTCGGTGATGCTTAACGTCCGCCTGCAGGTG
A_23_P35205	0.0053968336	7.126429E-5	up	1.804383	RCAN3	Homo sapiens RCAN family member 3 (RCAN3), transcript variant 1, mRNA [NM_013441]	CCACTGCTAGGCCTCAATGTAAATTCAGTTGAAATTTGCAATTCTATCAGCAATTTAATG
A_23_P25150	0.008023214	1.4452821E-4	up	1.3364179	HOXC9	Homo sapiens homeobox C9 (HOXC9), mRNA [NM_006897]	AGAAAACTCTTGCGATTTGGGAGGGTTCAGTGTTGAGATATTGGTGTTTTAGAGTTAGTT
A_21_P0000100	0.009307456	1.8372317E-4	down	-1.1595494	MTRNR2L1	Homo sapiens MT-RNR2-like 1 (MTRNR2L1), mRNA [NM_001190452]	ATGATATTATCTCAGCATTTTACTGTACCCACACCCACCCAAGAACAGGGTTTGTTAAGA
A_23_P371865	0.019504705	6.9047813E-4	down	-1.2174587	CDYL2	Homo sapiens chromodomain protein, Y-like 2 (CDYL2), mRNA [NM_152342]	TTAGATCGGGTGTCAGAGGACGACCAATCTTAGGGAATTTCCAGACCAATGAGCAAAATG
A_23_P99163	0.0036711404	2.6915473E-5	down	-1.3867598	DRAM1	Homo sapiens DNA-damage regulated autophagy modulator 1 (DRAM1), mRNA [NM_018370]	CCTCACGATGGAGTTTCATGCTTCATTTTCACATCTCTCTGCACAATTAGATTGGGAGCT
A_23_P38254	0.014767973	4.223246E-4	up	1.23137	ELAC2	Homo sapiens elaC ribonuclease Z 2 (ELAC2), transcript variant 1, mRNA [NM_018127]	GGGTCTAAGTGTCCGAGACTTAACGAAAATAGTATTTCAGCTGCAATAAAGATTGAGTTT
A_33_P3266530	0.002822251	1.535505E-5	up	1.1798959	DUS1L	Homo sapiens dihydrouridine synthase 1-like (S. cerevisiae) (DUS1L), mRNA [NM_022156]	GAAAATGCCTTTTACTCAGGGAATCTCCTGCTACTTAATGTGGAAAGACACGCCCATGTC
A_23_P4611	0.0041145575	3.8843355E-5	up	1.1991011	SLC27A5	Homo sapiens solute carrier family 27 (fatty acid transporter), member 5 (SLC27A5), mRNA [NM_012254]	CCATACCCTCAACCTCAGTGGGCTGGAAATGACAGTGGGCCCTGTAGCAGTGGCAGAATA
A_23_P380614	0.004660303	4.9414513E-5	down	-1.4225466	ATP9A	Homo sapiens ATPase, class II, type 9A (ATP9A), mRNA [NM_006045]	TGTGATGACACACATATGATCTTTCGTGTTTCTGAGCGACTCTACTTTCATTGTTTGCCA
A_33_P3221284	0.016439406	5.154831E-4	up	2.2643173	CCDC80	Homo sapiens coiled-coil domain containing 80 (CCDC80), transcript variant 1, mRNA [NM_199511]	AAAGTAGTTCATCTAGGAAACTGTCCTGGGAACCAAACTTCTGATTTCTTTTGCAACCCT
A_33_P3288364	0.015899146	4.806813E-4	up	1.2722237	SPATA2L	Homo sapiens spermatogenesis associated 2-like (SPATA2L), mRNA [NM_152339]	CCTCCCCAGAACACTCAGAGGGACGGTCAACATCAGAGCACATTAAACGCTGGTGAAACC
A_19_P00317953	0.0037125174	2.8161452E-5	up	1.8000183	LOC101059954	PREDICTED: Homo sapiens uncharacterized LOC101059954 (LOC101059954), misc_RNA [XR_172435]	CTTGGGTCTTAGCCACATCCTCCAGTCCATCTGGACTAGCAATAAAGCTGACATTTTAAT
A_23_P45365	0.009889119	2.0939301E-4	down	-1.1828798	COL4A5	Homo sapiens collagen, type IV, alpha 5 (COL4A5), transcript variant 2, mRNA [NM_033380]	CAGAACTGGGAAACAACACTTGGTTAGTCTCTTTTAAGTTACAAAAAGCCAATTGATGTT
A_21_P0006005	0.0035833889	2.5565872E-5	up	1.3242887			TAGGACAAAATTCCTTTTCACTGCAGTATTGGGAGCCTGGAACTAGAGTTACCAACCCCT
A_33_P3254460	0.0014100585	2.6325963E-6	up	1.8488328	DLK2	Homo sapiens delta-like 2 homolog (Drosophila) (DLK2), transcript variant 2, mRNA [NM_206539]	CTTCAGCTTGGGTACACACACAGAGGAGACCTCAGCCTCACACCAGAAATATTATTTTTT
A_33_P3272231	0.0046695285	4.9945684E-5	up	1.9444703	MFSD2A	Homo sapiens major facilitator superfamily domain containing 2A (MFSD2A), transcript variant 1, mRNA [NM_001136493]	GTGTGTATGTATATGTCTGTGAGCTATTAATGTTATTAATTTTCATAAAAGCTGGAAAGC
A_24_P48898	0.0077614477	1.3522379E-4	up	1.3033278	APOL2	Homo sapiens apolipoprotein L, 2 (APOL2), transcript variant beta, mRNA [NM_145637]	AGGTTTGATGTCCTTCCAAGAATAAAGTCTTTCCCTGGTGATGGTCTCTCGCTCTGTCTT
A_33_P3379091	0.0050034127	5.8673417E-5	up	1.9247068	SYNGR1	Homo sapiens synaptogyrin 1 (SYNGR1), transcript variant 1b, mRNA [NM_145731]	CCCAGGGCTTAGCACAAGCATGCTCAATAAATGTAAGCTCTTTTGTTCATTCATTCATTC
A_24_P726336	0.0036346668	2.6338725E-5	down	-1.4009441	PHACTR2	Homo sapiens phosphatase and actin regulator 2 (PHACTR2), transcript variant 1, mRNA [NM_001100164]	CTTAGAACATTGTTTAGCTTTCCTAAGTATATATAAATGCATATATGTATAAAATTGGGA
A_33_P3231542	0.012065918	3.0001486E-4	down	-1.2436081	ZFHX3	Homo sapiens zinc finger homeobox 3 (ZFHX3), transcript variant A, mRNA [NM_006885]	CTGTACCAAAATACATGGAGACTAACAAACAGAACCACATGGAACTTTCAAACTGAAAAA
A_23_P97394	0.005863252	8.261913E-5	down	-1.34701	BCAR3	Homo sapiens breast cancer anti-estrogen resistance 3 (BCAR3), transcript variant 2, mRNA [NM_003567]	ATAACTCTCCAGAGAACCTTTAGAATATCTTTTCAAGTTTCCCCAGCTTCATCTTTGGGA
A_33_P3312209	0.0070163235	1.1311521E-4	up	317.83533			AAGCATGCATTGCGGGTCTGATGCGGTCTATCACTGGCAGATCGGTGTCTGAGAACGTGG
A_33_P3255509	0.0028768918	1.6406157E-5	up	1.6378441	FCHO1	Homo sapiens FCH domain only 1 (FCHO1), transcript variant 1, mRNA [NM_001161357]	CCCCACACAGGTCCCGGCCTTTTAATGTTCTTTGAATAAACACTTTATTTTCTAATAAAA
A_23_P47857	0.005580051	7.478339E-5	down	-1.2735455	TM7SF3	Homo sapiens transmembrane 7 superfamily member 3 (TM7SF3), mRNA [NM_016551]	TATCTGTTCTTTGCATAATATTATGGTGCCCTTATTGATATATGGTAAGGGTGTACTAGG
A_33_P3232562	0.0053937337	7.070385E-5	down	-1.2496347	RBBP4	Homo sapiens retinoblastoma binding protein 4 (RBBP4), transcript variant 1, mRNA [NM_005610]	ATGCTATATCCCCAAGTTTTTCAGACTCATTTAAGTAAAGGCTAGAGTGAGTAAGGAATA
A_23_P54758	0.014250373	3.9937778E-4	up	1.1426413	GDE1	Homo sapiens glycerophosphodiester phosphodiesterase 1 (GDE1), mRNA [NM_016641]	AACAGATGTGATCTGATCATAGGCAATTAGAACTGGAAGAAACTTCCAAAAATATCTAGG
A_23_P133375	0.019919887	7.1491586E-4	up	1.1382312	SLC25A46	Homo sapiens solute carrier family 25, member 46 (SLC25A46), mRNA [NM_138773]	CAGTGCTAGCAACTTAATTTCTCATACATTTATAGAGTTTGGTTTGCTTTGCTAGTTGTG
A_23_P386942	0.0021284928	8.100856E-6	up	2.9201639	DIRAS1	Homo sapiens DIRAS family, GTP-binding RAS-like 1 (DIRAS1), mRNA [NM_145173]	ATCGTGGGGTCTGTGTAGCCTTCGCTCTAGACATAGTCTTCCTGCAATAAAAAAGTGGAT
A_23_P258944	0.016184742	4.985662E-4	down	-1.3100917	DNAJB9	Homo sapiens DnaJ (Hsp40) homolog, subfamily B, member 9 (DNAJB9), mRNA [NM_012328]	ATTTCTTTCTTAGTTGTTGGCACTCTTAGGTCTTAGTATGGATTTATGTGTTTGTGTGTG
A_24_P135753	0.009602833	1.9624076E-4	up	1.3132946	PTPLB	protein tyrosine phosphatase-like (proline instead of catalytic arginine), member b [Source:HGNC Symbol;Acc:9640] [ENST00000383657]	ATAATAAAAGGTTGGCATTGATATGGTACAACCTGCAAATTACTTGCAGTTCTGAGTTTC
A_23_P132226	0.017668705	5.820097E-4	up	1.15552	TPST2	Homo sapiens tyrosylprotein sulfotransferase 2 (TPST2), transcript variant 1, mRNA [NM_001008566]	GACACTCCAGGGTAGAGAATGAAGGGTATGGAAGTAGTCCGGCTTTTGAAACTTAGGTAT
A_33_P3230254	0.013942029	3.8386675E-4	down	-1.2953385	NCAPG	Homo sapiens non-SMC condensin I complex, subunit G (NCAPG), transcript variant 1, mRNA [NM_022346]	ATGTGGTTTACCATACCAAAGCTTGCTTTCTCTGGCATGGGAAAAATAAATTTAAGCACC
A_23_P200999	0.018357852	6.313576E-4	down	-1.4714296	ST3GAL3	Homo sapiens ST3 beta-galactoside alpha-2,3-sialyltransferase 3 (ST3GAL3), transcript variant 1, mRNA [NM_174963]	CTATAGCAGAAAGAACTTTAAAGCTCAGGAGGGTGACGCCCAGCTCCGCCTGCTGGGAAG
A_33_P3299892	0.006338683	9.38412E-5	down	-1.1582394	UQCRH	Homo sapiens ubiquinol-cytochrome c reductase hinge protein (UQCRH), mRNA [NM_006004]	GCTGGTAGCTTCTATGTAATTCGCAATGATTCCATCTAAATAAAAGTTCTATGATCTGCA
A_23_P200710	0.0025603706	1.2464013E-5	down	-1.4868091	PIK3C2B	Homo sapiens phosphatidylinositol-4-phosphate 3-kinase, catalytic subunit type 2 beta (PIK3C2B), mRNA [NM_002646]	CGGTGAAACTTTTCCAGATGAACGGACCATAAATGTGTTACTGGCTTTGTGCCTGTAGCT
A_19_P00319882	0.019784823	7.07872E-4	down	-1.1806849	TSTD3	Homo sapiens thiosulfate sulfurtransferase (rhodanese)-like domain containing 3 (TSTD3), mRNA [NM_001195131]	GAGAAGTACAATGAAGTAAAACCATCCAAATCTGACAGCTAGTGTTTTCTTATTTAGCCG
A_24_P228796	0.015295812	4.473676E-4	down	-2.2472396	GAGE7	Homo sapiens G antigen 7 (GAGE7), mRNA [NM_021123]	GTGGAACCAGCAACACCTGAAGAAGGGGAACCAGCAACTCAACGTCAGGATCCTGCAGCT
A_33_P3329378	0.0015465121	4.1147664E-6	up	4.4598546	CNTN6	Homo sapiens contactin 6 (CNTN6), mRNA [NM_014461]	TGCTCTCCAGCCTCTGACACAAGATGCGTTCTTAATACAGACTTGTTTGCAAAGAAAAAA
A_24_P280983	0.002822251	1.5174882E-5	down	-2.6522365	HOXA11-AS	Homo sapiens HOXA11 antisense RNA (HOXA11-AS), antisense RNA [NR_002795]	TGAGCCTTACGCTTCTTTCCACAGCCTTTGCAGGCGGAATATCGGAATAAAGTGGGTCCA
A_23_P69720	0.014529041	4.1176926E-4	down	-1.0892947	ANXA5	Homo sapiens annexin A5 (ANXA5), mRNA [NM_001154]	GTGCTTAACACATTGCCTTATTCATACTAGCATGCTCATGACCAACACATACACGTCATA
A_33_P3318911	0.012182763	3.0681337E-4	up	1.192212	INPP5K	Homo sapiens inositol polyphosphate-5-phosphatase K (INPP5K), transcript variant 3, mRNA [NM_001135642]	TATGAAGAATTGTCCCCTGGCTTCCAGCAGGCCATGGCTGGCTGTTTTGTGACTGTTACA
A_33_P3390057	0.0044180234	4.5104083E-5	up	1.3634353	TM4SF1	Homo sapiens transmembrane 4 L six family member 1 (TM4SF1), mRNA [NM_014220]	GACCACGAGGAAATACCCTCAAAACTAACTTGTTTACAACAAAATAAAGTATTCACTACC
A_21_P0014409	0.004955935	5.677025E-5	down	-1.6351242		PREDICTED: Homo sapiens uncharacterized LOC101928158 (LOC101928158), misc_RNA [XR_244213]	CAGCTCAGCTGCCAGTGCTGACCTTTCCGCTGCTACATGGTTCTGTGCAGAAAGAAAAAA
A_32_P2392	0.01212286	3.0343587E-4	up	1.9743111	GOLGA8A	Homo sapiens golgin A8 family, member A (GOLGA8A), transcript variant 1, mRNA [NM_181077]	TTCTTTTTTAATTTCATAATTGTAGGTCATTAGCGTGCATATCGAGTTTGCCCTTACGTG
A_23_P414913	0.0070562745	1.1473278E-4	up	1.2578639	GLIPR2	Homo sapiens GLI pathogenesis-related 2 (GLIPR2), transcript variant 1, mRNA [NM_022343]	TTAACAGCAGGCATCTGGGCAGGCCAGTCCTCAAAGCAGCTCCTGAAGGTCTGTGTTGCA
A_23_P73097	0.013968541	3.84872E-4	up	1.1698778	RGS20	Homo sapiens regulator of G-protein signaling 20 (RGS20), transcript variant 1, mRNA [NM_170587]	AAGCTCGGTTTGAATACGTCACTTACCAGTGCCATTGCAGGACCCAAATTCACAGTTCAT
A_23_P253932	0.017777666	5.896808E-4	up	1.2928631	FAIM	Homo sapiens Fas apoptotic inhibitory molecule (FAIM), transcript variant 1, mRNA [NM_001033030]	GGGAACCATGACTGTTACATAAAGGCTGTCAGTAGTGGGAAGCGGAAAGAAGGGATTATT
A_32_P91042	0.00432865	4.367979E-5	down	-1.2692374	LOC100129034	Homo sapiens uncharacterized LOC100129034 (LOC100129034), long non-coding RNA [NR_027406]	GTGGGGCCAATGAAGCCAATTCTTCTTTTGTACATATGCAGTCCTGTAAGAATGCATTCA
A_24_P406601	0.0140974205	3.917571E-4	down	-1.1774161	OLFM1	Homo sapiens olfactomedin 1 (OLFM1), transcript variant 1, mRNA [NM_014279]	TCAAAGGAATTACTCTCTTCTTGTTAAATTAGCTAAATCATGTAACCGCAGATAGGAAGG
A_23_P349406	0.0023997768	1.0216043E-5	up	2.8805723	RIMKLA	Homo sapiens ribosomal modification protein rimK-like family member A (RIMKLA), mRNA [NM_173642]	GTGAATTCCTGCTTTTTGGCAGCATTTAAACCAAATCCTACTGCTTCCCTAGTAGTTTTG
A_23_P154065	0.0035578406	2.480784E-5	up	1.3098366	TUBA4A	Homo sapiens tubulin, alpha 4a (TUBA4A), transcript variant 1, mRNA [NM_006000]	ATTATGAGGAGGTGGGCATCGACTCCTATGAGGACGAGGATGAGGGAGAAGAATAAAGCA
A_23_P350574	0.01048944	2.3836346E-4	up	2.372321	FCRLB	Homo sapiens Fc receptor-like B (FCRLB), mRNA [NM_001002901]	AATTTAGTCACCCTTAGCCCTTCAGATAAGCCTAGCCAGTACATATTTCAGCACAGGCAG
A_23_P389987	0.008410436	1.5581328E-4	up	2.1085637	TLX2	Homo sapiens T-cell leukemia homeobox 2 (TLX2), mRNA [NM_016170]	GCTGATTGTGACCGAAACCAGAGGGTTGTCCACCCCGGGCATCTCATCCCTCAACTGTAA
A_24_P161973	0.0067560175	1.07077925E-4	up	1.4782404	ATP11A	Homo sapiens ATPase, class VI, type 11A (ATP11A), transcript variant 1, mRNA [NM_015205]	AGCCTTGATGGGATATGTTAGAAGTGTCATGAAAGTGTGATTCTACTTTTGCAGAAAAAT
A_21_P0002247	0.019533867	6.9336203E-4	down	-1.6670386	XLOC_001546	BROAD Institute lincRNA (XLOC_001546), lincRNA [TCONS_00003749]	CCTGTTGGCCTATCAAATGGCACACCTTCAATCCAAGAATGAATTAATTAAATAAATGTG
A_24_P23625	0.003904076	3.2008822E-5	up	4.035275	HS3ST3B1	heparan sulfate (glucosamine) 3-O-sulfotransferase 3B1 [Source:HGNC Symbol;Acc:5198] [ENST00000360954]	TTGCGGTGTTTGAACAGTAGTCTGTTAACTTAGTAGGTGGTACCTGGAAAGGTATTTTAA
A_23_P65532	0.0038348974	3.053467E-5	down	-2.9296641	PELI2	Homo sapiens pellino E3 ubiquitin protein ligase family member 2 (PELI2), mRNA [NM_021255]	AAATCCATCTCCATCCCTTTACTGTCAATCTTCTGTCCCAGTAGTTTAGCCTTTGTGGCT
A_23_P143247	0.0061533824	8.986492E-5	down	-1.3370041	TSHZ2	Homo sapiens teashirt zinc finger homeobox 2 (TSHZ2), transcript variant 1, mRNA [NM_173485]	CCCACAAGAGCGTATGCAAATCTCTAAGTTTACGGGACTCTCAATGACCACTATCAGTCA
A_24_P832426	0.0033736592	2.2070264E-5	up	1.3558398	B3GALTL	Homo sapiens beta 1,3-galactosyltransferase-like (B3GALTL), mRNA [NM_194318]	TTTGGAATGGTGTAAGCCTAACCACAAATAAAAGATCTTTGCCTAAGTTTTTGATTTCCC
A_24_P238131	0.0077614477	1.349186E-4	up	1.6497904	SUSD5	Homo sapiens sushi domain containing 5 (SUSD5), mRNA [NM_015551]	CTTATTCCCCATAGTTGGGTAAAATAAAGCCTGAAGGTACCAACTAGAATACCTGTGCAT
A_32_P133090	0.0046695285	5.0095045E-5	up	3.3012686		RST35951 Athersys RAGE Library Homo sapiens cDNA, mRNA sequence [BG216262]	TCTGCAATGAATCCCAAAAGTATGTAGTTGAGCTGACTGCAAGGTGCTTGAGATGCAAGA
A_23_P25204	0.013460011	3.629022E-4	down	-1.1478856	SLC25A3	Homo sapiens solute carrier family 25 (mitochondrial carrier; phosphate carrier), member 3 (SLC25A3), transcript variant 3, mRNA [NM_213611]	GCAAATGTGGACTGAATCTGCTTGTTGATCAGTGTTGAAGAAAGTGCAAAAGGAACTTTT
A_23_P213620	0.004561502	4.7601567E-5	up	1.5221047	PPP2R2B	Homo sapiens protein phosphatase 2, regulatory subunit B, beta (PPP2R2B), transcript variant 10, mRNA [NM_001271948]	AGTTTTCTCTGGTGGGTCCAGTGTTTTGTTCCTAGGTGTCTGCTGCGATAAAATGAGGTT
A_19_P00803864	0.013554487	3.6731942E-4	down	-1.6307783	FAM105A	Homo sapiens family with sequence similarity 105, member A (FAM105A), mRNA [NM_019018]	CTGGTGAAAATGGTGTTTGTTGTAACATCTTGGTATCATTGTGGGTAAGTAGAACAAATA
A_21_P0000196	0.011840756	2.885433E-4	down	-2.5966322	SVOP	Homo sapiens SV2 related protein homolog (rat) (SVOP), mRNA [NM_018711]	GGAAGCCAATTTGTGCGTTCAACTCTTATTAAAACATGTCAGTGATGGACATTGAAAAAA
A_33_P3268304	0.0034852386	2.3826145E-5	up	1.3800408	LIMS2	Homo sapiens LIM and senescent cell antigen-like domains 2 (LIMS2), transcript variant 5, mRNA [NM_001161404]	CCAGCGCAGACCTGGTGTTTGTTTGTTGGGCTCACGCTTGCACAATGAAGGCTTGTTCAC
A_24_P110983	8.903381E-4	6.3085236E-7	up	4.619805	AKT3	Homo sapiens v-akt murine thymoma viral oncogene homolog 3 (AKT3), transcript variant 1, mRNA [NM_005465]	ACTGTATTACTATTACTGTTGGTCATACTAAACCTGTCTATTTCCTGAAGTATATGACCC
A_23_P206724	0.017697504	5.8572047E-4	up	1.1800579	MT1E	Homo sapiens metallothionein 1E (MT1E), mRNA [NM_175617]	GGCATCGGAGAAGTGCAGCTGCTGTGCCTGATGTGGGAACAGCTCTTCTCCCAGATGTAA
A_33_P3351944	0.009373224	1.8731212E-4	down	-1.517204	EGFR	Homo sapiens epidermal growth factor receptor (EGFR), transcript variant 3, mRNA [NM_201283]	GGAAATCAGTGTTTTAGAGAGAGAACTTTTCGACATATTTCCTGTTCCCTTGGAATAAAA
A_23_P367405	0.008410436	1.5572007E-4	up	1.5061749	PCBD1	Homo sapiens pterin-4 alpha-carbinolamine dehydratase/dimerization cofactor of hepatocyte nuclear factor 1 alpha (PCBD1), mRNA [NM_000281]	CACTCTCTTCATCCTGGGGGCTCTGTTACACTAATTTGAATAAACTCTCCCCTTTCTTTG
A_24_P535219	0.0054506036	7.2189156E-5	down	-1.3046682	PHF10	PHD finger protein 10 [Source:HGNC Symbol;Acc:18250] [ENST00000480008]	ACATTTAGTACAGGTACCATAACCAAGAGATTTCTTAGTTTTGATGGATTAAGAGAGAGC
A_33_P3244347	0.004389247	4.4377768E-5	down	-1.6169875	PC	Homo sapiens pyruvate carboxylase (PC), transcript variant 3, mRNA [NM_001040716]	TTGCCAAATAAGGGTCCCCTCCTCACTGGAGACTACAAGTGGTGGGTCAGGTGGTCCTAG
A_24_P174294	0.0050779954	6.1395556E-5	up	4.7076354	LRRTM4	Homo sapiens leucine rich repeat transmembrane neuronal 4 (LRRTM4), transcript variant 2, mRNA [NM_024993]	GCTGGATGTAAATTGTTCTTTTCTTGGTAATGTTGATCATTATGTGCAAAGACTGACTAC
A_23_P301304	0.006760008	1.07869826E-4	up	1.9322828	FGFR1	Homo sapiens fibroblast growth factor receptor 1 (FGFR1), transcript variant 1, mRNA [NM_023110]	GCTCTGTATATAGCTATGAAGAAAACACAAAGTGTATAAATCTGAGTATATATTTACATG
A_33_P3388312	0.009878171	2.0807247E-4	down	-1.1119378	SKAP2	Homo sapiens src kinase associated phosphoprotein 2 (SKAP2), mRNA [NM_003930]	CTCTGTACTGAATTTGTACTCTATTGCCATTAGATCTTACAATAATGTTCCACTCTGCAA
A_23_P166698	0.015210248	4.4143302E-4	up	1.1433814	SS18L2	Homo sapiens synovial sarcoma translocation gene on chromosome 18-like 2 (SS18L2), mRNA [NM_016305]	AACCTGAAGAGGAAACTCAGTAGGTGTTGGGCAGGAATTGGTGAGATTCCTGACTTGATA
A_33_P3245178	0.0039676973	3.464179E-5	up	1.9646386	BEX2	Homo sapiens brain expressed X-linked 2 (BEX2), transcript variant 1, mRNA [NM_001168399]	GGAGACCCCTGCTTCCTAAACTTACACATTTGTGGTGTACCTTTGTCGTAAACGTTTTGA
A_19_P00330814	0.0076772477	1.3300027E-4	up	1.4806755	HOTAIR	Homo sapiens HOX transcript antisense RNA (HOTAIR), transcript variant 3, long non-coding RNA [NR_047518]	ATACAGGAGTGATTATGCAGTGGGACCCTGCTGCAAACGGGACTTTGCACTCTAAATATA
A_24_P945283	0.01999106	7.190462E-4	up	1.2820315	DLG3	Homo sapiens discs, large homolog 3 (Drosophila) (DLG3), transcript variant 1, mRNA [NM_021120]	ACTCCTTCATCTCTAACAGAGGAAGAACTGTATTATCAAACCTTATGGTCTACCCATGAA
A_24_P12626	0.0042528436	4.154147E-5	up	1.4836069	CAV1	Homo sapiens caveolin 1, caveolae protein, 22kDa (CAV1), transcript variant 1, mRNA [NM_001753]	TTGACTTTGAAGATGTGATTGCAGAACCAGAAGGGACACACAGTTTTGACGGCATTTGGA
A_21_P0003404	0.0062802066	9.2335955E-5	up	1.2572228		BX104861 NCI_CGAP_GC6 Homo sapiens cDNA clone IMAGp998M105540, mRNA sequence [BX104861]	ATCCCTGTCCTCTGTCTCTGGAACTCCAGTTGCTAATTAAAACTTCTGCATAGGTCGCTT
A_23_P143981	0.018482575	6.378326E-4	down	-4.390792	FBLN2	Homo sapiens fibulin 2 (FBLN2), transcript variant 1, mRNA [NM_001004019]	CACTGCGTGGGAGGGACTGGGTCACTATTGTGGTTTTTACTATAACTTTGTAAATTAACT
A_32_P114574	0.004561502	4.6950838E-5	up	1.16075	CACYBP	Homo sapiens calcyclin binding protein (CACYBP), transcript variant 1, mRNA [NM_014412]	AGAAAATTTATGAAGATGGAGACGATGATATGAAGCGAACCATTAATAAAGCCTGGGTGG
A_33_P3332487	0.017937327	6.0063304E-4	up	2.2520225	FANK1	fibronectin type III and ankyrin repeat domains 1 [Source:HGNC Symbol;Acc:23527] [ENST00000368689]	TGAAGATTTGCTGGTCCGAATACTTCAAGGAGGGTGAGAGAACTCTGTCAGTTGTTTTTT
A_24_P357169	0.009679909	1.9917272E-4	up	1.5235993	EPPK1	Homo sapiens epiplakin 1 (EPPK1), mRNA [NM_031308]	TGGGCTTCCTCCGTGCAGTTTTCTGCAACTCTGGAGAAGTTGAGGCATACTTGTGTGTCT
A_23_P170337	0.015899146	4.8029955E-4	down	-1.4456664	ALDH4A1	Homo sapiens aldehyde dehydrogenase 4 family, member A1 (ALDH4A1), transcript variant P5CDhL, mRNA [NM_003748]	TGGTGCCAGCTGGGCTGGGTGTGGGTTCTGTGTCCTTCCAGGATATGTGTCATTTCCCAT
A_23_P104692	0.011883408	2.9018195E-4	up	1.3418369	PELI3	Homo sapiens pellino E3 ubiquitin protein ligase family member 3 (PELI3), transcript variant 1, mRNA [NM_145065]	CAAAGGGAGGAGAGAGGACTCACTGGTCAAGAGTGTCGGCTGTGACACAAGGGCCATCAT
A_24_P11061	0.0101880245	2.248879E-4	up	1.4025276	CSAG1	Homo sapiens chondrosarcoma associated gene 1 (CSAG1), transcript variant a, mRNA [NM_153478]	ACTATCCAGCCACTCTGACCAGCCGAACCAGGAACTCAATCAAAATGCGCCACAGCAGGA
A_23_P88522	0.015250895	4.4545275E-4	down	-1.4008875	NMB	Homo sapiens neuromedin B (NMB), transcript variant 1, mRNA [NM_021077]	GGGTCACCAGAAATATCGCTGATGCAGACACAGATTATGTTCCTGCTGTATTTCCTGCTT
A_23_P337270	0.016291669	5.0603424E-4	up	1.5102453	NEK10	NIMA-related kinase 10 [Source:HGNC Symbol;Acc:18592] [ENST00000383770]	TGTGCTGGAGTATATGACAGCTGCGGTACTTGAGGGCTTCATTGCCAGAACACATTATAT
A_23_P133814	0.016018111	4.882958E-4	up	1.235673	HIST1H3C	Homo sapiens histone cluster 1, H3c (HIST1H3C), mRNA [NM_003531]	TCTGTGCGCTATTCACGCTAAACGCGTCACCATCATGCCCAAAGATATCCAGCTGGCACG
A_32_P18250	0.0039074826	3.225244E-5	down	-1.1097479	FUNDC2P2	Homo sapiens FUN14 domain containing 2 pseudogene 2 (FUNDC2P2), non-coding RNA [NR_003663]	TCAGATACCTAACCAGGTCAGGAGCAAAGCTGAGGAGGTGGTGTCATTTGTGAAGAAAAA
A_23_P139919	0.019767532	7.0555194E-4	up	1.452956	CHST11	Homo sapiens carbohydrate (chondroitin 4) sulfotransferase 11 (CHST11), transcript variant 1, mRNA [NM_018413]	AGTCTACAAACTCGATTTTTTAATGTTCAATTACTCAGTGCCAAGCTACCTGAAATTGGA
A_33_P3235975	0.0100087	2.1382824E-4	up	1.4245479	CHCHD6	Homo sapiens coiled-coil-helix-coiled-coil-helix domain containing 6 (CHCHD6), mRNA [NM_032343]	TGTATAAACTGTCTTCAGAGCAATTCCATGAGGCAGCCTCAAAGATGGAGAGCACAATAA
A_23_P45361	0.015328658	4.5044304E-4	up	1.2125298	GLUD2	Homo sapiens glutamate dehydrogenase 2 (GLUD2), mRNA [NM_012084]	CAAATTATGCACACAGCCATGAAGTATAACCTGGGATTGGACCTGAGAACAGCTGCCTAT
A_23_P252711	0.009889119	2.0888988E-4	down	-1.2522304	LACTB2	Homo sapiens lactamase, beta 2 (LACTB2), mRNA [NM_016027]	GGAAAAATATTTAGCAACACAGATCCTGACAAGAAATGGAAAGCTCATCTTTAGTTTCAG
A_24_P295963	0.0039493167	3.3886703E-5	up	1.1615901	SLC38A2	Homo sapiens solute carrier family 38, member 2 (SLC38A2), mRNA [NM_018976]	AGGTTCAAAATCAAGTGCCTAGGGAAAATTCCAATGGATGATTTTCTGGGAGCTATCTTG
A_23_P161352	0.010875521	2.5228105E-4	down	-1.6592962	PTPLA	Homo sapiens protein tyrosine phosphatase-like (proline instead of catalytic arginine), member A (PTPLA), mRNA [NM_014241]	TTCTGTGATTGTGACTGGGGTCCAAGTGAGTTCAAGAATCTTTATGGTGTGGCTCATTAC
A_32_P204676	0.014432019	4.0705266E-4	up	1.1604184	FABP5	Homo sapiens fatty acid binding protein 5 (psoriasis-associated) (FABP5), mRNA [NM_001444]	TGCGAAAAATGGGCGCAATGGCCAAGCCAGATTGTATCATCACTTGTGATGGTAAAAACC
A_21_P0011017	0.017697504	5.859754E-4	down	-1.3845851	XLOC_014512	BROAD Institute lincRNA (XLOC_014512), lincRNA [TCONS_l2_00005184]	GCTTCCTGTTGTACATGAGTACGTGCTTTATAGTGAAATGTTAATGGGTGAGATTGGAAA
A_23_P153945	0.014378367	4.0438183E-4	down	-1.4479622	GTDC1	Homo sapiens glycosyltransferase-like domain containing 1 (GTDC1), transcript variant 1, mRNA [NM_001006636]	CGCTTATGATTTCAATAGTCAAACTGCTGTGTTTGTTGATGTAAAGATGTTTTGAATGGC
A_23_P256158	0.0059322068	8.4413434E-5	down	-1.9423764	ADRA2C	Homo sapiens adrenoceptor alpha 2C (ADRA2C), mRNA [NM_000683]	TAGTCGGGGGGTGGCTGCCAGGGGGCAAGGAGAAAGCACCGACAATCTTTGATTACTGAA
A_24_P325520	0.009831591	2.0306878E-4	up	1.4880835	SORT1	Homo sapiens sortilin 1 (SORT1), transcript variant 1, mRNA [NM_002959]	CACGAAAGTGTAAAGCAGTATTAAGATCATTACTGCATGTGCCCTAAAAACCCAAGTTTT
A_33_P3346102	0.015899146	4.8036684E-4	down	-1.5088034	TAOK3	Homo sapiens TAO kinase 3 (TAOK3), mRNA [NM_016281]	CCTTCCTAAGTCCCATTTCTTGGTCATAAATATTGCATTATTCACACTTTCAAACTGTGT
A_33_P3386621	0.008131796	1.4776632E-4	up	2.9741602	LOC101928179	PREDICTED: Homo sapiens uncharacterized LOC101928179 (LOC101928179), misc_RNA [XR_243586]	GTGGCCAAGTTAGGGCTTTAGGTTACCCATCACCCAAATAAAGTATATTGTACCCATTAA
A_23_P152791	0.0037022473	2.7578359E-5	down	-3.999723	SLC16A6	Homo sapiens solute carrier family 16, member 6 (SLC16A6), transcript variant 2, mRNA [NM_004694]	GAGATATGTAGAAAGACTCTTTGGTTCACATTCCGATATTAAAATAGTGACATGAACTGG
A_33_P3233436	0.018338032	6.294988E-4	up	1.9808947	PNMA6C	Homo sapiens paraneoplastic Ma antigen family member 6C (PNMA6C), mRNA [NM_001170944]	AGTGGACACTCATCCCGTGACAGCGATGGTGACCATGACTGTGGGAGAAAGAACAGGACC
A_23_P45871	8.9715177E-4	8.7646407E-7	down	-2.3410313	IFI44L	Homo sapiens interferon-induced protein 44-like (IFI44L), mRNA [NM_006820]	TTGTTCGTTTTGCCTTCTGTCCTTGGAACAGTCATATCTCAAGTTCAAAGGCCAAAACCT
A_23_P211748	0.018036911	6.116463E-4	up	1.3258345	GTF2E1	Homo sapiens general transcription factor IIE, polypeptide 1, alpha 56kDa (GTF2E1), mRNA [NM_005513]	ACACAGTATTTTAGGGTGCATCCAGTATACCATTGAGCATTGTAACCTCAGGAAACAGTT
A_21_P0010220	0.004077527	3.657136E-5	up	1.720184		PREDICTED: Homo sapiens uncharacterized LOC101930100 (LOC101930100), transcript variant X3, misc_RNA [XR_254012]	ACACTTGAAAGAACAGCCATCTGGTCTAACCTCTCACTGGTGCTTCAGAGGAGGAAAAAA
A_33_P3281985	0.004792225	5.2418945E-5	up	5.7875905	CR2	Homo sapiens complement component (3d/Epstein Barr virus) receptor 2 (CR2), transcript variant 1, mRNA [NM_001006658]	GTACAATTCAGGCTTTGGATGTTTCTTTAGCAGTTTTGTGATAAGTTCTAGTTGCTTGTA
A_21_P0012605	0.019504705	6.9077476E-4	down	-1.2314101	CEP170	Homo sapiens centrosomal protein 170kDa (CEP170), transcript variant alpha, mRNA [NM_014812]	CAAAAAGCTACAGAAGGTCCAGGCTACTGAAAAGCATCAAGACCAAGCTGTTACTAGCTC
A_23_P164057	8.9715177E-4	8.3245203E-7	down	-6.5574927	MFAP4	Homo sapiens microfibrillar-associated protein 4 (MFAP4), transcript variant 2, mRNA [NM_002404]	AAATTACACCTGGAGTCAGGTGCAGAAGGGAACCTTGTATTTCACAGGCCTCATTTTGAT
A_23_P15603	0.0024237537	1.0382632E-5	up	1.3308897	MRM1	Homo sapiens mitochondrial rRNA methyltransferase 1 homolog (S. cerevisiae) (MRM1), mRNA [NM_024864]	CCAGCCCAGGGGACCCGTTCCTCTTGAACCAGTCATTGCCTGTGGCAAATGTGTGTATGA
A_23_P19455	0.014714433	4.199235E-4	down	-1.124464	MDC1	Homo sapiens mediator of DNA-damage checkpoint 1 (MDC1), mRNA [NM_014641]	GAACTTGAAGGGATGCTTGGAGTGAGTAGATTTGAGGGTCCAGTTATGGAGTGCTACTAA
A_23_P35995	0.0024996835	1.1381864E-5	down	-2.0100806	CLMP	Homo sapiens CXADR-like membrane protein (CLMP), mRNA [NM_024769]	AAAGGGATCTAGGAATGCTGAAAGATTACCCAACATACCATTATAGTCTCTTCTTTCTGA
A_33_P3250671	0.0070227194	1.1389021E-4	up	1.5293088	TCF7	Homo sapiens transcription factor 7 (T-cell specific, HMG-box) (TCF7), transcript variant 1, mRNA [NM_003202]	AGCCAAGGTCATTGCAGAGTGCACACTTAAGGAGAGCGCTGCCATCAACCAGATCCTGGG
A_23_P357374	0.016788954	5.350468E-4	up	1.2772651	PTH2	Homo sapiens parathyroid hormone 2 (PTH2), mRNA [NM_178449]	CGCCCTCGAGCGCCGCCACTGGCTGAACTCGTACATGCACAAGCTGCTGGTGTTGGATGC
A_21_P0007476	0.013340645	3.5626587E-4	down	-3.522325	LINC00592	Homo sapiens long intergenic non-protein coding RNA 592 (LINC00592), long non-coding RNA [NR_027358]	CCCCTTATACAAAACTTGGAGCTCAGACCACAAACAACAACAACAATCCAAAAAATAAAA
A_23_P133923	0.015204598	4.408042E-4	down	-1.1688888	GPANK1	Homo sapiens G patch domain and ankyrin repeats 1 (GPANK1), transcript variant 2, mRNA [NM_033177]	CTGAAGTTTTTGGTCAATAGGCTCTGTCTTCGTGAGAGACGGGCTGAGAGTCAGAAATAA
A_23_P114670	0.015514253	4.604326E-4	up	1.6447462	ARHGEF16	Homo sapiens Rho guanine nucleotide exchange factor (GEF) 16 (ARHGEF16), mRNA [NM_014448]	ACAGGAGGCACCAATAGCGATTATTGGGGGCAATGCGAGGTCTCCTCCTATGCCCTTCCT
A_23_P206661	0.0148252295	4.2542294E-4	down	-1.1837286	NQO1	Homo sapiens NAD(P)H dehydrogenase, quinone 1 (NQO1), transcript variant 1, mRNA [NM_000903]	GTTTATATACAGTACACAGATACCTTGAAAGGAAGAGCTAATAAATCTCTTCTTTGCTGC
A_23_P345887	0.005986729	8.5779226E-5	down	-1.2971405	GFPT1	Homo sapiens glutamine--fructose-6-phosphate transaminase 1 (GFPT1), transcript variant 1, mRNA [NM_001244710]	GAATTCCCAAACCATGTAACACTCATTGAGAATTCCAGATCCATTATATCTAAAGGGCAA
A_33_P3383233	0.0046695285	4.9894912E-5	up	2.4744873	NDRG2	Homo sapiens NDRG family member 2 (NDRG2), transcript variant 11, mRNA [NM_001282213]	TATGGACCTACGTGAATGTGTGTCAGGGGGAGACTTGCTGGTGGGTTAGTGGTCCTCAGG
A_21_P0000332	0.015106997	4.3589043E-4	up	1.3450644	SNORA45	Homo sapiens small nucleolar RNA, H/ACA box 45 (SNORA45), small nucleolar RNA [NR_002977]	AACTCTTGTCCTGGTGTGCTAGAGTACTCGAAGAGAATCTACTGGTCTTGATTCACTGGT
A_33_P3280845	8.9715177E-4	8.321368E-7	up	1.9111549	THY1	Homo sapiens Thy-1 cell surface antigen (THY1), mRNA [NM_006288]	TTATGGCATCTCATTGAGGACAAAGAAAACTGCACAATAAAACCAAGCCTCTGGAATCTG
A_23_P210210	0.00887374	1.6942518E-4	down	-1.3352076	EPAS1	Homo sapiens endothelial PAS domain protein 1 (EPAS1), mRNA [NM_001430]	ACACTGAAAAATATTCCAAGCTTCATATTAACCCTACCTGTCAACGTAACGATTTCATGA
A_23_P110403	0.0020907004	7.4801806E-6	up	2.9994771	PDLIM3	Homo sapiens PDZ and LIM domain 3 (PDLIM3), transcript variant 1, mRNA [NM_014476]	AAACATACACTTAGCTATGTTTTGCAACTCTTTTTGGGGCTAGCAATAATGATATTTAAA
A_23_P19226	0.009889119	2.088663E-4	down	-1.1104957	DSE	Homo sapiens dermatan sulfate epimerase (DSE), transcript variant 1, mRNA [NM_013352]	GCAGTTCTTCTCATAGATAGCTGTATTTTATTATGGTTGTACTCTTCTTGTTCCCAATCA
A_23_P210581	0.0014145512	2.7470944E-6	up	2.6543055	KCNG1	Homo sapiens potassium voltage-gated channel, subfamily G, member 1 (KCNG1), mRNA [NM_002237]	CCCTATGTGTGTTTCCCTCAATAAGGAGATGCCTTGTTCTTTTCACCATGCAAATAACAT
A_21_P0010984	0.0014120501	2.6825303E-6	up	2.5688806	LOC100505504	PREDICTED: Homo sapiens uncharacterized LOC100505504 (LOC100505504), transcript variant X2, misc_RNA [XR_247239]	TGACACATTTGTCCAGAGCAAGACAAGATCACACTTTGACAGCCCTCTGTCAAGATCCTT
A_23_P69699	0.0049071717	5.5528966E-5	down	-22.162766	NPY1R	Homo sapiens neuropeptide Y receptor Y1 (NPY1R), mRNA [NM_000909]	AGGAATATTCACTTTACCTAGCAGGGAAAAGTACACAAAAACTGCAGATACTTCATATAG
A_21_P0009258	0.009484548	1.9178829E-4	up	2.6447096	LOC101927389	PREDICTED: Homo sapiens uncharacterized LOC101927389 (LOC101927389), misc_RNA [XR_243722]	AAATAACTTAATGAGTAAATGAAGGACTGGACTCGTTTGTGGGCCATATTTGGAGGTGAC
A_21_P0008791	0.017000588	5.451419E-4	down	-1.0913216	XLOC_011592	BROAD Institute lincRNA (XLOC_011592), lincRNA [TCONS_00023807]	GAATGTAAATCTCTGTTTACCACAAGCCCTCTGTCTCCACAAGTTCTGTGTCCAGAACTG
A_32_P190303	0.01081618	2.5047816E-4	up	2.7806633	LONRF2	Homo sapiens LON peptidase N-terminal domain and ring finger 2 (LONRF2), mRNA [NM_198461]	TGGAGATAGGTGATGTGTTGTCATATCCTGTGATACAGGTCACTCATCTGGCCTTCTGTT
A_33_P3376239	0.0058788164	8.330611E-5	down	-1.1001531	KMT2E	Homo sapiens lysine (K)-specific methyltransferase 2E (KMT2E), transcript variant 1, mRNA [NM_182931]	GTCACACTGAAGCACTGGTTGGGCATTTTAATTCATGTTAATAAATCACAATTATGTCAG
A_33_P3313796	0.008855079	1.6771228E-4	up	1.3438827	CCDC34	Homo sapiens coiled-coil domain containing 34 (CCDC34), transcript variant 1, mRNA [NM_030771]	GTTGATCTTGGCATGTTGTTTTGCAGAATAAGTGGCTGAATATGTAAGAATTGTGTTTGT
A_21_P0000800	0.005963682	8.520595E-5	down	-1.1504896	RNASEH1-AS1	Homo sapiens RNASEH1 antisense RNA 1 (RNASEH1-AS1), transcript variant 3, long non-coding RNA [NR_038431]	AGAAAACTGAGTTGAGAAGGGTCCATTCAAGAATTGTGCCCACAATATACCAGGCACTTG
A_32_P103633	0.010133533	2.2079755E-4	up	1.1571361	MCM2	Homo sapiens minichromosome maintenance complex component 2 (MCM2), transcript variant 1, mRNA [NM_004526]	TTTGGGTGGGATGCCTTGCCAGTGTGTCTTACTTGGTTGCTGAACATCTTGCCACCTCCG
A_23_P133095	0.010307133	2.3193836E-4	up	1.3856211	RAPGEF2	Homo sapiens Rap guanine nucleotide exchange factor (GEF) 2 (RAPGEF2), mRNA [NM_014247]	CTGCTAATCTCAGTTCGCTCTGTGATGTCAAGTGCAGAATGTACAATTAACTGGTGATTT
A_23_P82775	0.016955854	5.4270495E-4	up	1.7551937	SOX17	Homo sapiens SRY (sex determining region Y)-box 17 (SOX17), mRNA [NM_022454]	ACCCTATTTCCAAGTTCAAGTTAACTAGCTTTGAATGTGTCCCAAAACAGCTTCCTCCAT
A_23_P19182	0.010606844	2.4228566E-4	up	1.5739962	REEP2	Homo sapiens receptor accessory protein 2 (REEP2), transcript variant 2, mRNA [NM_016606]	CTCCCGGTTCCTTGGGAAGAGGGTGCCCATTGGACCTTTGGCACTGGATGAGCCAATAAA
A_23_P87049	0.009602833	1.968274E-4	down	-1.5595448	SORL1	Homo sapiens sortilin-related receptor, L(DLR class) A repeats containing (SORL1), mRNA [NM_003105]	ATGACGTCCCCATGGTGATAGCCTGAAAGAGCTTTCCTCACTAGAAACCAAATGGTGTAA
A_23_P202138	0.017402079	5.6864833E-4	up	1.6817944	SFXN3	Homo sapiens sideroflexin 3 (SFXN3), mRNA [NM_030971]	ACTGACATTTCTTAGACATTCAGCAAAACCCCCACCTTAACCTCTTTTCTTTCTTGAGGG
A_24_P244706	0.01340334	3.5956976E-4	down	-1.1831616	SSTR1	Homo sapiens somatostatin receptor 1 (SSTR1), mRNA [NM_001049]	GCTTCAACAACTTTGTGCTTTCCTGAAAGCAGTAACCAAGAGTTAAGATATCCCTAATGT
A_33_P3236868	8.043037E-4	3.8135371E-7	up	1.342123	MT1X	Homo sapiens metallothionein 1X (MT1X), mRNA [NM_005952]	TGCCAGGACAGCTGTGCTCTCAGATGTAAATAGAGCAACCTATATAAACCTGGATTTTTT
A_32_P60459	0.007269786	1.20783414E-4	down	-1.7112801	OTUD1	Homo sapiens OTU domain containing 1 (OTUD1), mRNA [NM_001145373]	GTGTAGAGTAGATTGTCTGGTGCTCTCAGTTGTTTTTATTTACATTTGTCACGTTGTTGT
A_32_P163089	0.0037863487	2.9774988E-5	up	1.4665698	C12orf75	Homo sapiens chromosome 12 open reading frame 75 (C12orf75), mRNA [NM_001145199]	TATGGTGTCCAGTCAAACAAAGACGGTTCGGAAAAATTAGAAGAAAATAACATCATGACT
A_33_P3399373	0.0014632412	3.3085666E-6	up	1.5017061	TPRA1	Homo sapiens transmembrane protein, adipocyte asscociated 1 (TPRA1), transcript variant 1, mRNA [NM_001136053]	CAAAGCATCCACCATGGTGGATGGACTGAAGTGTGTATATTTTCTTGATCTATTTTTTAA
A_23_P413788	0.0021872197	8.578347E-6	up	1.2146611	FUT11	Homo sapiens fucosyltransferase 11 (alpha (1,3) fucosyltransferase) (FUT11), transcript variant 1, mRNA [NM_173540]	TTTATCTTAATGATGAGTAGCCAAGGTCTAACATAGGGCCTCTCCTCAAGGAGAGATGGA
A_24_P229669	0.0040157614	3.5694604E-5	up	1.8295296	GOLGA8I	Homo sapiens golgin A8 family, member I (GOLGA8I), non-coding RNA [NR_024074]	AGGGCAGTCCTGTTTCTTGCTTCCTGCCTCTGACTTTTAAAGGTGGGTAGCCCTGGGCTC
A_21_P0004235	9.6057507E-4	1.1592601E-6	up	155.10338	XLOC_004309	BROAD Institute lincRNA (XLOC_004309), lincRNA [TCONS_00009889]	TTTCCCCTCTTTGAGTTGCCATTTGTTTCTGGTTACAACCCCTGAAATAACAGCGCTCTC
A_23_P257971	0.0014891978	3.433969E-6	down	-2.6168306	AKR1C1	Homo sapiens aldo-keto reductase family 1, member C1 (AKR1C1), mRNA [NM_001353]	TTATCCATTTTCTGATGAATATTAACATGGAGGGCATTGCATGAGGTCTACCAGAAGGCC
A_23_P126266	0.016762545	5.3292396E-4	down	-1.365908	HLX	Homo sapiens H2.0-like homeobox (HLX), mRNA [NM_021958]	AGGCCTGGAGAAAAGGTTTGAGATTCAGAAGTACGTGACCAAGCCGGACCGAAAGCAGCT
A_23_P131846	0.002784826	1.4544609E-5	down	-1.7307149	SNAI1	Homo sapiens snail family zinc finger 1 (SNAI1), mRNA [NM_005985]	AACAATGTCTGAAAAGGGACTGTGAGTAATGGCTGTCACTTGTCGGGGGCCCAAGTGGGG
A_23_P168610	0.0031122605	1.9113862E-5	up	1.4588289	TSPAN13	Homo sapiens tetraspanin 13 (TSPAN13), mRNA [NM_014399]	GAGAGGTTTTGAGATTTGTTGGTGGCATTGGCCTGTTCTTCAGTTTTACAGAGATCCTGG
A_23_P32861	0.007901987	1.4017412E-4	up	1.2515769	NMD3	Homo sapiens NMD3 ribosome export adaptor (NMD3), mRNA [NM_015938]	TAAGTGTCTCTACTATCTTTGCCTCCAGATTTCAAGAGGAGAAATTTAGTTTTAAACCTG
A_24_P142442	0.018357852	6.3122285E-4	up	1.0660369	POLDIP2	Homo sapiens polymerase (DNA-directed), delta interacting protein 2 (POLDIP2), mRNA [NM_015584]	GCTTTAGGTATGGATTGATGACTAAGTCAAGCTACTTCCTGAGCTTCTCTCAGATTTCCA
A_33_P3349827	0.010522631	2.393251E-4	down	-1.1762575	RBM3	Homo sapiens RNA binding motif (RNP1, RRM) protein 3 (RBM3), mRNA [NM_006743]	TTTCATCACCTTCACCAACCCAGAGCATGCTTCAGTTGCCATGAGAGCCATGAACGGAGA
A_21_P0011401	0.017858058	5.947416E-4	up	1.2905138	LOC100996255	Homo sapiens uncharacterized LOC100996255 (LOC100996255), long non-coding RNA [NR_102756]	ATCACCGTGTGTTACTGGCACAGATGCATCGGCTAGTGAAGAAAGAAGACATTCAAACTA
A_23_P81973	0.008925062	1.7150387E-4	up	1.3357941	HSD17B8	Homo sapiens hydroxysteroid (17-beta) dehydrogenase 8 (HSD17B8), mRNA [NM_014234]	AGCTTGGACGACATGGGATCCGCTGTAACTCTGTCCTCCCAGGGTTCATTGCAACACCCA
A_23_P9415	0.011207365	2.63513E-4	down	-1.3136773	ACO1	Homo sapiens aconitase 1, soluble (ACO1), transcript variant 2, mRNA [NM_002197]	AATTATACCAGTGTTAAGTGACATAGATAAGAACTTTGCACACTTCAAATCAGAGCAGTG
A_23_P156562	0.0052775485	6.698479E-5	up	5.584657	CRIP3	Homo sapiens cysteine-rich protein 3 (CRIP3), mRNA [NM_206922]	CTCCATGGTAGGCCAGAGAGTCTAGACTTTCTCTGCCAATTTTTTCCCTTTCCCATTTCT
A_23_P432352	0.008844712	1.6679925E-4	down	-1.3670611	CXorf61	Homo sapiens chromosome X open reading frame 61 (CXorf61), mRNA [NM_001017978]	CAGGCAGAAGCGAATATTGGTAAACCTCAGTATGGTGGAAAACAAGCTGGTTGAACTGGA
A_24_P200162	0.012996452	3.4374424E-4	down	-1.042243	HIGD1A	Homo sapiens HIG1 hypoxia inducible domain family, member 1A (HIGD1A), transcript variant 3, mRNA [NM_014056]	TATTCCATGTATCGGGAATTCTGGGCAAAACCTAAGCCTTAGAAGAAGAGATGCTGTCTT
A_24_P192727	0.005244312	6.542599E-5	up	1.3710746	KAZALD1	Kazal-type serine peptidase inhibitor domain 1 [Source:HGNC Symbol;Acc:25460] [ENST00000465807]	AAGAGGCGACATCTCTGGCAAGTTGGGAGTACAGGAAGTAGCGAAGGAGTGCCATCTGGT
A_23_P141447	0.01571203	4.7081354E-4	up	1.8405683	RDM1	Homo sapiens RAD52 motif 1 (RDM1), transcript variant 2, mRNA [NM_001034836]	GAAGACAGCCCAGAAGCTTGCTATTCAGAAGGCTTTGTCAGATGCATTCCAGAAACTGTT
A_24_P190472	0.004955935	5.6846886E-5	down	-1.4855487	SLPI	Homo sapiens secretory leukocyte peptidase inhibitor (SLPI), mRNA [NM_003064]	AAGAGATGTTGTCCTGACACTTGTGGCATCAAATGCCTGGATCCTGTTGACACCCCAAAC
A_32_P132438	0.0031768456	1.9910462E-5	up	1.2055407	AKAP1	Homo sapiens A kinase (PRKA) anchor protein 1 (AKAP1), transcript variant 1, mRNA [NM_003488]	CACACTGGACAGGTGACTGTATGGTAGAGACTGTGATCTGGGAACTTTTTGCTGTACAAA
A_33_P3417626	0.01853458	6.399926E-4	up	1.462168	ENHO	Homo sapiens energy homeostasis associated (ENHO), mRNA [NM_198573]	TAGGCCCTCTAGGCTGGGGAAGCAAACTGGAACCCATGGCAATAATAGGAGGGTGTCCAG
A_24_P289471	0.0064894618	9.888247E-5	up	1.3240706	RNASET2	Homo sapiens ribonuclease T2 (RNASET2), mRNA [NM_003730]	ATGCGAGAAAATTCAAAACGACTGTAGAGACCCTCCGGATTACTGGACAATACATGGACT
A_23_P55190	0.013200774	3.514899E-4	up	1.1445587	EFTUD2	Homo sapiens elongation factor Tu GTP binding domain containing 2 (EFTUD2), transcript variant 1, mRNA [NM_004247]	AAGGGGATGAAACCCCAAGGGGCCCTATCTTTGGGATTTACATGGAATTTTATTTTCTAC
A_23_P167040	0.0076028486	1.3111201E-4	up	1.3641733	PDIA5	Homo sapiens protein disulfide isomerase family A, member 5 (PDIA5), transcript variant 1, mRNA [NM_006810]	GGAAGTTCGCAGAAAAGTATGACAGCGACCGCACAGAATTGGGATTTACCAATTATATTC
A_33_P3337272	0.0033755456	2.2353284E-5	up	1.8317952	NRARP	Homo sapiens NOTCH-regulated ankyrin repeat protein (NRARP), mRNA [NM_001004354]	CACATTCCTGAGTGTACGATATTGACCTGTAGCCCAGCGTGAAAAATTTATAAATAAATT
A_33_P3332547	0.012405712	3.144322E-4	up	1.3151982	IQCJ-SCHIP1	Homo sapiens IQCJ-SCHIP1 readthrough (IQCJ-SCHIP1), transcript variant 1, mRNA [NM_001197113]	AGAGACATGACTATTGGGCAGCTACAAGTGATAGTCAATGATCTCCATTCCCAGATAGAA
A_33_P3303414	0.0037125174	2.8784743E-5	down	-1.5806936	MAN1A1	Homo sapiens mannosidase, alpha, class 1A, member 1 (MAN1A1), mRNA [NM_005907]	GGACCATCTTTATGACCTGCTTTCTGTTTTTCAATATCATACATTGGTGTATGTCAAAGA
A_33_P3254320	0.0037152278	2.8996043E-5	up	1.5707376	SH2D3A	Homo sapiens SH2 domain containing 3A (SH2D3A), mRNA [NM_005490]	TAGCAGTTGACTTCACCTCTGTGTCGGCCTTTAACAAAATCATAGCCATACAGCAGCTCA
A_23_P13713	8.9715177E-4	9.671569E-7	up	2.1125412	PRPH	Homo sapiens peripherin (PRPH), mRNA [NM_006262]	CCTGACACTTGATGTGACCTATGTGCTTCCCTTTTCATGTCCCGATAAGAAGCCAATGAT
A_23_P251916	0.012653527	3.261951E-4	down	-1.2062005	RMDN1	Homo sapiens regulator of microtubule dynamics 1 (RMDN1), transcript variant 1, mRNA [NM_016033]	CAGGAAGTGGGTCTTTCTAGGGATGTGGCATTCTGCTGGATGGCTTTTTAAAATGGGTTT
A_23_P256413	0.0037125174	2.8274862E-5	up	1.917251	CMTM7	Homo sapiens CKLF-like MARVEL transmembrane domain containing 7 (CMTM7), transcript variant 1, mRNA [NM_138410]	ATCTAGCTTGTCAGTCCGGTCTTAGAGATACCCTCTTTCCTGAAGTGAGGCGTGCCTGTA
A_23_P211909	0.0065189027	9.96257E-5	up	1.9338456	PLS1	Homo sapiens plastin 1 (PLS1), transcript variant 2, mRNA [NM_002670]	ATACTGTTGTGCAACAAAAATGTCACTTTATCTCAGTGTGAATGAGTAGTCTAAATTCCC
A_23_P373649	0.011581212	2.7892235E-4	up	1.2637839	TIMM23	Homo sapiens translocase of inner mitochondrial membrane 23 homolog (yeast) (TIMM23), transcript variant 1, mRNA [NM_006327]	ACAGGACTAACACTTACCAGCCTCTATGCACTATATAATAACTGGGAGCACATGAAAGGC
A_23_P335428	0.0012186333	1.8253439E-6	down	-1.612666	HIBADH	Homo sapiens 3-hydroxyisobutyrate dehydrogenase (HIBADH), mRNA [NM_152740]	ACACTGTTGGGAACCAAACTCTGTCTTGGAGCCTCCTTTTAGCTCACTCCACAAGTAAAT
A_33_P3226167	0.0081290165	1.4755562E-4	down	-1.1835567	FAM129B	Homo sapiens family with sequence similarity 129, member B (FAM129B), transcript variant 1, mRNA [NM_022833]	CATCCCTCCCTGATATTGTATTGAAAATATTATGCACACTGTTCATGCTTCTACTAATCA
A_33_P3215768	0.008280163	1.5254876E-4	up	5.472366	GALNT6	Homo sapiens UDP-N-acetyl-alpha-D-galactosamine:polypeptide N-acetylgalactosaminyltransferase 6 (GalNAc-T6) (GALNT6), mRNA [NM_007210]	AAATTTCATCTGGGAAGGCTTCTTTTGACTGTCAGTAGCAGGATGTCACCAGATGAGGGT
A_23_P49279	0.0031122605	1.9137651E-5	down	-1.2042836	C16orf87	Homo sapiens chromosome 16 open reading frame 87 (C16orf87), mRNA [NM_001001436]	ATTCTGACTGCATCAATAAGGGCCATCGATTGTTTCTTTCTCGCCTGTCGTTTAGCCTGT
A_23_P202170	0.019114697	6.683118E-4	up	1.1363801	MGEA5	Homo sapiens meningioma expressed antigen 5 (hyaluronidase) (MGEA5), transcript variant 1, mRNA [NM_012215]	GTGACTGTGAAACAGATGCCCTGGTCTTGCTTTCATCACTCTAGGATCATGAAGTGCTAT
A_24_P195724	0.01863269	6.44482E-4	up	1.1109269			ATGAATTATGTGAAGAATTGCTTCCAGATGACTGACCAGAGGATTCAAGATCTCTGGCAG
A_33_P3316555	0.007901987	1.4004605E-4	down	-1.5862244	MGST3	Homo sapiens microsomal glutathione S-transferase 3 (MGST3), mRNA [NM_004528]	GGCCTGGGCTTGGCCTGGATTGTTGGACGAGTTCTTTATGCTTATGGCTATTACACGGGA
A_23_P217570	0.0048588277	5.3626274E-5	down	-2.047407	CAPN6	Homo sapiens calpain 6 (CAPN6), mRNA [NM_014289]	GTAGTACTTAGCCTACCTAGACCAGCAAGCATTCATTTTTAGCTCGCTCATTTTTTACCA
A_24_P212129	0.0063972296	9.544798E-5	down	-1.2148942	ZNF33A	Homo sapiens zinc finger protein 33A (ZNF33A), transcript variant 2, mRNA [NM_006974]	TATTGTGTTCACAAACCAGAGGTGATCTTCAGGCTGCAACAAGGAGAAGAGCCATGGAAA
A_33_P3336686	0.0039248555	3.279802E-5	up	1.3518802	CLIC3	Homo sapiens chloride intracellular channel 3 (CLIC3), mRNA [NM_004669]	GTCTGTCGCCCAATAAAGGCATCTTTGTCGGGAGTGAGGGTGTCCTGACATCTGAAGGGC
A_23_P369328	0.005627837	7.5833006E-5	up	2.4906142	C10orf35	Homo sapiens chromosome 10 open reading frame 35 (C10orf35), mRNA [NM_145306]	GGAGCAGGACTTGGGCTTAGGGCAGGTGGAAAAAATTCCAGACTTTTTTAGCACTGTTTT
A_24_P602871	5.883739E-4	1.6234523E-7	down	-3.2610927	SAMD5	Homo sapiens sterile alpha motif domain containing 5 (SAMD5), mRNA [NM_001030060]	TTCGGGTTGCTAAAGCCATTATTCATAGAAAATTTCTGCCCCTACAGAAGTGTGTGCATG
A_33_P3216292	8.9715177E-4	9.90971E-7	down	-1.7428582	TBC1D2	Homo sapiens TBC1 domain family, member 2 (TBC1D2), transcript variant 1, mRNA [NM_001267571]	CACTGCCTCTATAGGGTAACCTGGAACATTCTCTAGGTTATATCAATATAAAACAATGTA
A_23_P143348	0.0013565666	2.2458382E-6	up	6.1292205	OVOL2	Homo sapiens ovo-like zinc finger 2 (OVOL2), mRNA [NM_021220]	TGTCTGGCGCAGTTGCTCACATTCACCAAAGTTTGTTTTCATGATCCTGATGGCCAAGAA
A_23_P93938	0.0041554747	3.947533E-5	up	2.014057	NACAD	Homo sapiens NAC alpha domain containing (NACAD), mRNA [NM_001146334]	TGGGCTTGCGGCAGATTCAGGGAGTCACCAGGATCACCATCCAGAAGTCCAAGAACATCC
A_23_P326691	0.0039493167	3.362397E-5	down	-1.2600496	RBBP4	Homo sapiens retinoblastoma binding protein 4 (RBBP4), transcript variant 1, mRNA [NM_005610]	AGTTTCCTCTTGGTTTCTTCAGTTAAGTCAAAACAACACGTTCCTCTTTCCCCATATATT
A_24_P230057	0.019738426	7.0334604E-4	up	1.4267232			ACCTGGACTCAATGAGAAATCTGAAGGCAAGCTTGGAGAGCAGCCTGAGGAAAGTGGAGG
A_33_P3375314	0.0050779954	6.1737854E-5	down	-1.5078256	ATP9A	Homo sapiens ATPase, class II, type 9A (ATP9A), mRNA [NM_006045]	GTGCGAGCTTCCTTATGACTTGAATTTTGTTGTCACATGATAAAAGTTTCTGTGTAGCTG
A_33_P3341474	0.0044180234	4.508314E-5	up	1.3658494	ZBTB38	Homo sapiens zinc finger and BTB domain containing 38 (ZBTB38), mRNA [NM_001080412]	GGGCAATCCAAACCAGATTCACCAAAAATTTGATAACTGTTATCTGCTAAAACTAACTTC
A_23_P37484	0.004098543	3.7055135E-5	down	-1.114072	CHSY1	Homo sapiens chondroitin sulfate synthase 1 (CHSY1), mRNA [NM_014918]	CAGTGATAGACTTGCCATTTTAATACACGTCATTGGAGGGCTGCGTATTTGTAAATAGCC
A_24_P377269	0.017218651	5.589215E-4	up	1.1554067	HSPA4	Homo sapiens heat shock 70kDa protein 4 (HSPA4), mRNA [NM_002154]	GTACAGACACAGCTGTGCCTTCGGATTCAGACAAGAAGCTTCCTGAAATGGACATTGATT
A_24_P40626	0.0029712096	1.7592918E-5	down	-2.147225	GREM2	Homo sapiens gremlin 2, DAN family BMP antagonist (GREM2), mRNA [NM_022469]	GCAAACACGAGCACACTCTCTTCGAACCCAATTGTGGGTGTAGCAATGAAAGCAATATGA
A_23_P80048	0.007386974	1.2612258E-4	up	1.654017		fer-1-like 4 (C. elegans) pseudogene [Source:HGNC Symbol;Acc:15801] [ENST00000400465]	GAAGTCTTTCTTACCCATGTGAGCTACCCCAGAGTCTAGTGCTTCCTCTGAATAAACCTA
A_21_P0012336	0.0017750743	4.9328028E-6	up	1.5511061	GGTLC1	Homo sapiens gamma-glutamyltransferase light chain 1 (GGTLC1), transcript variant A, mRNA [NM_178311]	ACTTTGGGGGACGGGCTTCCCCTGTGAGCAGCAGAGCAGCATAATAAATGAGGCCACTGT
A_23_P140434	0.012970395	3.417769E-4	up	1.879726	MYO5C	Homo sapiens myosin VC (MYO5C), mRNA [NM_018728]	CTATAATACAGACTGGTGTCTTAGAGGTAGGAATAATACATGATTATGAAGCATCACCCT
A_33_P3851788	0.01628976	5.0533284E-4	down	-1.2333763	CIRBP-AS1	Homo sapiens CIRBP antisense RNA 1 (CIRBP-AS1), long non-coding RNA [NR_027271]	TGAGCCTCTGCCTTTTCCTGGTTTTGCGAAGCGCCGTGTTCATTCATTCATTCATTCATT
A_33_P3420224	0.010252835	2.2753094E-4	up	1.9762273	ENTPD8	Homo sapiens ectonucleoside triphosphate diphosphohydrolase 8 (ENTPD8), transcript variant 1, mRNA [NM_001033113]	CACTTGGAGGGTGAGACTGCAGTGGGGGTTGTTTTTATTAAAAGCATCATGGACACAGCA
A_24_P173823	0.012065918	3.0034597E-4	down	-1.2426718	PBX1	Homo sapiens pre-B-cell leukemia homeobox 1 (PBX1), transcript variant 1, mRNA [NM_002585]	ATGATACTAACACGGTGTAGGTTTTACAGTCTCCTAATTTGTACTGGTAATGCATATTCC
A_21_P0005486	0.016594172	5.2491465E-4	down	-5.2947145	XLOC_006390	BROAD Institute lincRNA (XLOC_006390), lincRNA [TCONS_00013751]	CTGAAGATGCACAAATAATTTCAAGTTCAGTTCTCAGGGATTCAAAGGACATGAAAATTC
A_23_P309361	0.0027897668	1.4873365E-5	down	-1.337937	HENMT1	Homo sapiens HEN1 methyltransferase homolog 1 (Arabidopsis) (HENMT1), transcript variant 1, mRNA [NM_144584]	CAGACTGCAGTGAGCCCTGAGAAAGATATGAGGGTTTAAAACGGGTGCTTTCCTTTGATT
A_23_P74778	0.0074671656	1.280363E-4	up	2.1663296	C1orf54	Homo sapiens chromosome 1 open reading frame 54 (C1orf54), mRNA [NM_024579]	AGAAGGCTGCTATGACTCTTTGGATGGGAGTCTGGCAAGAGGAAATTGGAAGATAAAATA
A_21_P0008668	0.014783144	4.2304982E-4	up	1.7157279	XLOC_011344	BROAD Institute lincRNA (XLOC_011344), lincRNA [TCONS_00023493]	GTCTCAAAGGAAGAAGAAATAAAACAAACTTCTACATGGCAAAATAAACCTCTACATGGC
A_21_P0011306	0.019504705	6.9007796E-4	up	1.3209307	SYNGR2	Homo sapiens synaptogyrin 2 (SYNGR2), mRNA [NM_004710]	GTCAGCCGCTCACTCCTCCAGGGCACTTTTAGGAAAGGGTTTTTAGCTAGTGTTTTTCCT
A_23_P300150	0.0045759236	4.8068887E-5	up	2.1109354	NFATC1	Homo sapiens nuclear factor of activated T-cells, cytoplasmic, calcineurin-dependent 1 (NFATC1), transcript variant 3, mRNA [NM_172387]	AGCCTTTCTCAGGGGACTGTCATTGAAAAGGAAACGTTTGATGTCTGTGTCAGCTGTCTT
A_33_P3608172	0.019151589	6.699791E-4	up	1.1427753	GPS2	Homo sapiens G protein pathway suppressor 2 (GPS2), mRNA [NM_004489]	GTGACCATCAGATTATATCTTCAACACCACACCCCCCACCCCATCGTGGGTGAGGGTATC
A_23_P69810	0.0027449648	1.4174122E-5	up	1.544246	AGPAT9	Homo sapiens 1-acylglycerol-3-phosphate O-acyltransferase 9 (AGPAT9), transcript variant 1, mRNA [NM_032717]	GTAACAAAGAGCTTAGTTTTCCTTGTTTGAATGCTGTAGATCTGTACCTAGTACCCCTCC
A_33_P3287825	0.0184158	6.348023E-4	up	2.0237126	CCDC136	Homo sapiens coiled-coil domain containing 136 (CCDC136), transcript variant 1, mRNA [NM_022742]	CTTCCATCTCCTGCCTTGTGTAAGAACCTGAGTTCCTTGTAATTAAATATCAACTGAATT
A_23_P128084	0.002060766	6.9342404E-6	up	2.6295178	ITGA7	Homo sapiens integrin, alpha 7 (ITGA7), transcript variant 2, mRNA [NM_002206]	AGGAGGTTGTGTCACTGACTCAGGCTGCTCCTTCTCTAGTTTCCCCTCTCATCTGACCTT
A_24_P510377	0.0037125174	2.8437316E-5	up	1.4908648		Homo sapiens cDNA clone IMAGE:5268928. [BC031250]	CCCGGATCTTCTCTTCATACAGCCGCCTGAGGAAGTTGATCTCGTCAGTCAGCCCTTCCA
A_21_P0009771	0.011886235	2.9048527E-4	up	1.6631327	XLOC_013364	BROAD Institute lincRNA (XLOC_013364), lincRNA [TCONS_00027380]	TGCCCAGACACACTTGAGGCTGCAGGGTTTTGCTTCCCAAGGCCCTCACCAGAATCAGAT
A_33_P3359084	0.012022619	2.966348E-4	down	-2.4769652	TAS1R3	taste receptor, type 1, member 3 [Source:HGNC Symbol;Acc:15661] [ENST00000339381]	CGGAGAGAAGGGGCACAGGCCACACATCTGTCCCATAAAATTAAACGCTTTTTAGTGTTT
A_23_P214026	0.016503775	5.191278E-4	down	-1.3640114	FBN2	Homo sapiens fibrillin 2 (FBN2), mRNA [NM_001999]	GTTCCCTTGAAAGGGAACACCTGGCATTCTGTGGTGTTTCGTGCTGTCTTAAATAATGGT
A_24_P196528	0.0025523647	1.217352E-5	up	1.2519529	CRB1	Homo sapiens crumbs homolog 1 (Drosophila) (CRB1), transcript variant 1, mRNA [NM_201253]	TTCTCCTATCATGTGGTCAAAGTTATTGTTGTATACCAGCGATGGGATGTATACTTTTGT
A_33_P3217213	0.0067560175	1.0725885E-4	up	1.3487877	PDLIM7	Homo sapiens PDZ and LIM domain 7 (enigma) (PDLIM7), transcript variant 1, mRNA [NM_005451]	ACCATGCTATGACGTGCGCTATGCACCCAGCTGTGCCAAGTGCAAGAAGAAGATTACAGG
A_33_P3220570	0.0014145512	2.9129158E-6	up	1.3718802	UBTD1	Homo sapiens ubiquitin domain containing 1 (UBTD1), mRNA [NM_024954]	CACAGCAGGTCCCTGTGGACAGACATATCTGCATATTTATCAATAAAGCCTTTTGCTCCT
A_32_P80741	6.9015485E-4	2.5843912E-7	down	-6.5643106	C8orf22	Homo sapiens chromosome 8 open reading frame 22 (C8orf22), transcript variant 1, mRNA [NM_001007176]	AAAGACTATCGCTGGAAGTGGCACTTGCTACCTGGTGCATCTTTGAAAAGTGTGCCTTTA
A_23_P99661	0.01885041	6.553563E-4	up	1.474495	ARHGEF40	Homo sapiens Rho guanine nucleotide exchange factor (GEF) 40 (ARHGEF40), transcript variant 1, mRNA [NM_018071]	AACAATAGGAGGGTGTGACAGGGGAACCGTAGACTTTATATATGTAATTACTGTTATTAT
A_21_P0011386	0.0036100682	2.5969666E-5	up	1.8301806	LOC100505679	Homo sapiens uncharacterized LOC100505679 (LOC100505679), mRNA [NM_001243531]	AACAATGAAAACGGGCTTGTTGATGGAGGAAAAGTTGGAATGCAGCCTCTGGTGCTGTTT
A_23_P23006	0.017668705	5.8223604E-4	down	-1.1606609	NRD1	Homo sapiens nardilysin (N-arginine dibasic convertase) (NRD1), transcript variant 1, mRNA [NM_002525]	CTTCTAGTGAGGATTCAAATTCTTCTTGTGAAGTGATGCAGCTGACCTACCTGCCAACCT
A_23_P202004	0.009676357	1.9890894E-4	down	-2.4854782	PRTFDC1	Homo sapiens phosphoribosyl transferase domain containing 1 (PRTFDC1), transcript variant 1, mRNA [NM_020200]	CTCTTGATTGGAGCTTCCGGTATGTGATGACGGTATGTCATGTATGCATGGATGTACTCA
A_19_P00320907	0.009520988	1.9274159E-4	up	2.529061		Uncharacterized protein [Source:UniProtKB/TrEMBL;Acc:K7EKJ0] [ENST00000587247]	CTCCAGATCGTTCTCGAACTTTCCCCACTACTTCCATAATAAAATGTATACTTGTTGAAA
A_23_P80040	0.0010502836	1.4469665E-6	up	1.9666731	PROCR	Homo sapiens protein C receptor, endothelial (PROCR), mRNA [NM_006404]	ACAATCAAAATACAACATTCAATACTTCCAGGTGTGTCAGACTTGGGATGGGACGCTGAT
A_33_P3403867	0.012071889	3.0097045E-4	up	1.2793127	PMEPA1	Homo sapiens prostate transmembrane protein, androgen induced 1 (PMEPA1), transcript variant 1, mRNA [NM_020182]	ATCTGGAGCAAAGAGAAGGATAAACAGAAAGGACACCCTCTCTAGGGTCCCCAGGGGGGC
A_24_P567298	0.0051966785	6.4147906E-5	up	1.3657978	CSAG2	Homo sapiens CSAG family, member 2 (CSAG2), transcript variant 2, mRNA [NM_004909]	CAAGGCCAGAAGACTTCAAGTTCTATCTGAAAAGTCTCCCAGAGGTCTAACCCCAGATAA
A_21_P0000075	0.013469233	3.642127E-4	up	1.2985228	SAP25	Homo sapiens Sin3A-associated protein, 25kDa (SAP25), mRNA [NM_001168682]	CTTCTCAGGGCAGAGTGGGCTGGTTGTGTTGACAATAAAACAGTGTTGGTTTGCAAAAAA
A_33_P3242973	0.015514253	4.6048334E-4	up	3.2040207	IGF2BP2	Homo sapiens insulin-like growth factor 2 mRNA binding protein 2 (IGF2BP2), transcript variant 1, mRNA [NM_006548]	GAAAATGAGGAAATGATCGTCAGAATTATCGGGCACTTCTTTGCTAGCCAGACTGCACAG
A_23_P414308	0.016401775	5.126868E-4	up	1.2986456	FLCN	Homo sapiens folliculin (FLCN), transcript variant 2, mRNA [NM_144606]	GCCTTCGGGAAGCTCACCCTCCGATCTCGGTGTGATTGTTGTGATTGTTGTGATTTCCTG
A_33_P3418120	0.010285046	2.3064276E-4	down	-1.144437	IPPK	Homo sapiens inositol 1,3,4,5,6-pentakisphosphate 2-kinase (IPPK), mRNA [NM_022755]	CAGCACGTCTTCAGGGTGTGGTTTCTAAGCAGAAAATAGCAAATGTTTATATTGAATAAA
A_33_P3393341	0.019504705	6.885473E-4	up	1.3699645	LPIN3	Homo sapiens lipin 3 (LPIN3), mRNA [NM_022896]	CAGCTGCCTAAGCCCTCACCTTGGGGGAGGATCAAAGGGAATAAAGAGAACTCTTGGCTG
A_23_P127079	0.011767706	2.8480543E-4	up	1.1999438	PPRC1	Homo sapiens peroxisome proliferator-activated receptor gamma, coactivator-related 1 (PPRC1), mRNA [NM_015062]	ACCGGGAAGACTTTGACCCAGCACCTGTAAAGAGCAAATTTGATTCTCTTGACTTTGACA
A_33_P3298128	0.0140413055	3.8857906E-4	down	-1.9609267	ITPR2	Homo sapiens inositol 1,4,5-trisphosphate receptor, type 2 (ITPR2), mRNA [NM_002223]	CAGTAGAGGATTGTTATATTTGCCTAAAAAACACGATTCCAATATATGACAAGGGCAGAT
A_23_P6344	0.0064382586	9.707065E-5	up	1.108411	SDF2L1	Homo sapiens stromal cell-derived factor 2-like 1 (SDF2L1), mRNA [NM_022044]	CAGGGCCACTCTTGGCAGAGACTTTGGGTTTGTAGGGGTCCTCAAGTGCCTTTGTGATTA
A_33_P3310366	0.00887374	1.6905446E-4	down	-1.2993804	LOC100132352	Homo sapiens FSHD region gene 1 pseudogene (LOC100132352), non-coding RNA [NR_034006]	AGAAAGTATCAAGGAGTGAGCTGAAGCCACTGCCCTTGAGAACCCTCTCGAGGAGTCTGG
A_33_P3415430	0.014578076	4.1402093E-4	up	1.1573532	HSPA1B	Homo sapiens heat shock 70kDa protein 1B (HSPA1B), mRNA [NM_005346]	GTTTCGTTCCCTTTAAATGAATCAACACTGCCACCTTCTGTACGAGTTTGTTTGTTTTTT
A_23_P214080	0.0035833889	2.5523304E-5	down	-2.793639	EGR1	Homo sapiens early growth response 1 (EGR1), mRNA [NM_001964]	AAACAAAGTGACTGTTTGGCTTATAAACACATTGAATGCGCTTTATTGCCCATGGGATAT
A_33_P3276693	0.016298065	5.065541E-4	up	2.3200104	PGF	Homo sapiens placental growth factor (PGF), transcript variant 1, mRNA [NM_002632]	TCCCTGCAGGGCCATCTGACTGCCAAGCCAGATTCTCTTGAATAAAGTATTCTAGTGTGG
A_23_P15101	0.0015355358	3.9645083E-6	down	-5.5663266	TMC5	Homo sapiens transmembrane channel-like 5 (TMC5), transcript variant 3, mRNA [NM_024780]	TGGGCATTCCATGCTATTTTTAATACCTGGATTGCTGATTTTTCAAGACAAAATACTTGG
A_24_P13041	0.0140413055	3.8926938E-4	up	1.5933751	RTKN2	Homo sapiens rhotekin 2 (RTKN2), transcript variant 1, mRNA [NM_145307]	CTTTACAGAGAGAGGCCTACTAATCAATGTGCTTAGAGAAACAAACTACCTTTACATTCA
A_23_P321703	0.004561502	4.7704878E-5	down	-1.2267452	BCL2A1	Homo sapiens BCL2-related protein A1 (BCL2A1), transcript variant 1, mRNA [NM_004049]	AGGAAAGATCTGTGAAATGCTCTTCTGTCCTGAAGCAATACTGTTGACCAGAAAGGACAC
A_21_P0010786	0.0019605006	6.1041073E-6	up	1.8425914	LOC100509303	PREDICTED: Homo sapiens uncharacterized LOC100509303 (LOC100509303), transcript variant 3, misc_RNA [XR_112011]	GAGTTCAGTTAGTGTCTCATCTATCACTGTAATATTTGTATTGTAACACTAATCGTGGCA
A_33_P3213377	0.005174308	6.343088E-5	down	-1.4335902	IMMP2L	Homo sapiens IMP2 inner mitochondrial membrane peptidase-like (S. cerevisiae) (IMMP2L), transcript variant 1, mRNA [NM_032549]	CAGAAATTGGAATCTGTTCTTCCTCCAGAGCGCTTACCAGTACAGAGAGAAGAGGAATGA
A_23_P24616	0.009859655	2.0442573E-4	down	-1.4546895	SIAE	Homo sapiens sialic acid acetylesterase (SIAE), transcript variant 1, mRNA [NM_170601]	ACAGATCTCTTTGTATTCTCTTCAAGCCCAAACCAATTCTGTTCCTTCAATCTAAATAGT
A_23_P146325	0.0033736592	2.1711363E-5	down	-2.104864	ASAP1-IT1	Homo sapiens ASAP1 intronic transcript 1 (non-protein coding) (ASAP1-IT1), long non-coding RNA [NR_002765]	TGGAAAGTGAAGTGAAGGATTTTTGTCATACAGCCAGTAAGTGCCAGAACTGACTTGAAC
A_21_P0008818	0.0101418905	2.220706E-4	up	1.4876368	XLOC_011193	BROAD Institute lincRNA (XLOC_011193), lincRNA [TCONS_00023891]	AATTTATTTTCCAGACTGACCTTCAGCTTAAATATGCCAGTGTGTGATTTAATCCATAGG
A_24_P135406	0.010588964	2.4166855E-4	down	-1.3265712	KCTD9	Homo sapiens potassium channel tetramerization domain containing 9 (KCTD9), mRNA [NM_017634]	TGGAAGGAAGTCAGATGACAGGAATTAACCTGAGAGTGGCTACCTTAAAAGATGCAAAGT
A_24_P235266	0.0023619947	9.77589E-6	up	1.3773825	GRB10	Homo sapiens growth factor receptor-bound protein 10 (GRB10), transcript variant 4, mRNA [NM_001001555]	TCTTTGGCTCGTGAACCTAATTGTAAACTTTCAGGTATTTTTGTACAAATAAGGGACTGA
A_23_P213699	0.0015354342	3.8090852E-6	down	-4.727647	NRG2	Homo sapiens neuregulin 2 (NRG2), transcript variant 3, mRNA [NM_013982]	CTAGCTAACGGCAAAGGCGTTTTTATAGGGAAACTATTTATATGTAACATCCTGATTTAC
A_33_P3691916	0.011766141	2.8447315E-4	down	-1.5311853	FAM13A	Homo sapiens family with sequence similarity 13, member A (FAM13A), transcript variant 1, mRNA [NM_014883]	GTTTGGAATTCTTTGCTCTACTGTTTACATTGCAGATTGCTATAATTTCAAGGAGTGAGA
A_23_P425502	0.01819962	6.2074396E-4	up	1.0973073	DONSON	Homo sapiens downstream neighbor of SON (DONSON), mRNA [NM_017613]	TGAGGAAAAAAGCCTTCTAGCAAGGAAATTCAAGATTCTTGAAGTTGAAGGAATATACTG
A_23_P425516	0.00887374	1.6946835E-4	up	1.2531394	TSPAN17	Homo sapiens tetraspanin 17 (TSPAN17), transcript variant 1, mRNA [NM_012171]	CACGTATGTTGTATAAATGGATGAAACAGGCCCTTGAGTTGGGAGCCTGCTTCACTTTGA
A_23_P69468	0.019999495	7.201379E-4	up	1.1135991	NDUFB4	Homo sapiens NADH dehydrogenase (ubiquinone) 1 beta subcomplex, 4, 15kDa (NDUFB4), transcript variant 1, mRNA [NM_004547]	TGGATCGAACATTTCACCTCTCATATTAAGTCTGGCAATGATGACTATATGTATTCCTGC
A_33_P3424257	0.004561502	4.721201E-5	up	1.3586738	NAA50	Homo sapiens N(alpha)-acetyltransferase 50, NatE catalytic subunit (NAA50), mRNA [NM_025146]	ATGGTGTGGTGGTGGAAAAGAAAAGCTCCCTCAGTTTTTTGGAGGGAATAACTTAAAAAA
A_33_P3279629	0.015927594	4.8279704E-4	up	1.3757274	UCN2	Homo sapiens urocortin 2 (UCN2), mRNA [NM_033199]	AGCATTGTGTATATAGCAGACATGGAGGTCCTGCAGCAGGAGGTGCTCAATAAACACAAA
A_23_P167599	0.0100087	2.138142E-4	up	1.3894871	FAM134B	Homo sapiens family with sequence similarity 134, member B (FAM134B), transcript variant 1, mRNA [NM_001034850]	ACTGAAGACTTTGAACACTTGCTTTTTGTGATTGCTTATGTCATTAGTGCCTCATGACTG
A_33_P3384562	0.009985768	2.127479E-4	up	1.209547	PDLIM7	Homo sapiens PDZ and LIM domain 7 (enigma) (PDLIM7), transcript variant 4, mRNA [NM_213636]	GGTACTGCTGTCTGCCAGGTCTGTGCTGCCTTGGGCATGGAATAAACATTCTCAGCCCTG
A_24_P166663	0.014446982	4.0842078E-4	down	-1.252253	CDK6	Homo sapiens cyclin-dependent kinase 6 (CDK6), transcript variant 1, mRNA [NM_001259]	TTGGTGTTGAAATATCACTGTCCAATGTGTTCACTTATGTGAAAGCTAAATTGAATGAGG
A_32_P342064	0.019379498	6.8100553E-4	down	-1.1373575	FTH1	Homo sapiens ferritin, heavy polypeptide 1 (FTH1), mRNA [NM_002032]	AACATCCACTTAAGTTCTTTGATTTGTACCATTCCTGCAAATAAAGAAATTTGGTACCCC
A_24_P98251	0.012816381	3.3392964E-4	down	-1.2978009	VPS13B	Homo sapiens vacuolar protein sorting 13 homolog B (yeast) (VPS13B), transcript variant 5, mRNA [NM_017890]	TACCTGGGTTTAATACAGCTCACATCACTGAATGTTACACATGAGTTTAAATGGGTAATA
A_23_P51397	0.015606083	4.6597718E-4	up	1.2696372	ENAH	Homo sapiens enabled homolog (Drosophila) (ENAH), transcript variant 1, mRNA [NM_001008493]	CTTTTGATTTTGTTGGGTAAGTTAAATAGTCTGTAGTAGGTAGAGTACTGGGTACAAGTG
A_21_P0000140	9.7566895E-4	1.2114378E-6	down	-1.2458706	LEPROT	Homo sapiens leptin receptor overlapping transcript (LEPROT), transcript variant 3, mRNA [NM_001198683]	AACCAGGATTATCATCTATATTGGAAGTCAGCAAACTGCCACATATAACCTGCTACCTGT
A_24_P217365	0.013325962	3.5561112E-4	up	1.2334474	ANKRD28	Homo sapiens ankyrin repeat domain 28 (ANKRD28), transcript variant 1, mRNA [NM_015199]	GTGAAATGGTGGTAATAGCAAATGACCTCCTTTAACAAGACACTCATCTCAAACAATGCC
A_33_P3232011	0.0054506036	7.2175615E-5	up	2.743845	RAB17	Homo sapiens RAB17, member RAS oncogene family (RAB17), transcript variant 1, mRNA [NM_022449]	GCCTGAGATATAAGTTGTACTGCGTATGCAGTTTTTCCTCCAAAAATTAAATTGCTTTTG
A_33_P3343442	0.0072187777	1.19224576E-4	up	1.7600037	ZNF316	Homo sapiens zinc finger protein 316 (ZNF316), mRNA [NM_001278559]	TCCGAGCACCAGGCCGCGTTCGCCGGGCCCTCGGGCGCCTACCGGGAGGGCGTCCTGTGA
A_23_P50946	9.6057507E-4	1.1417306E-6	down	-9.058964	RAMP1	Homo sapiens receptor (G protein-coupled) activity modifying protein 1 (RAMP1), mRNA [NM_005855]	ACCTCTGGAAAGGGTCCCAGCCTAGACTGCTTACCCCATAGCCACATTTGTGGATGAGTG
A_33_P3377649	0.004111762	3.8492817E-5	up	1.9510409	PRSS16	Homo sapiens protease, serine, 16 (thymus) (PRSS16), mRNA [NM_005865]	CAACTGTCTGGTGTGGGTGACCGGCAGTGGTTGTATCAGACATGTACCGAGTTCGGCTTC
A_33_P3397763	0.005627837	7.568121E-5	up	1.6956977	TNFSF9	Homo sapiens tumor necrosis factor (ligand) superfamily, member 9 (TNFSF9), mRNA [NM_003811]	CGGTATTGCTATGTTGCCAAGGTTGTTTACATGCCAGTACAATTTATAATAAACACTCAT
A_23_P114774	0.016197504	5.000478E-4	down	-1.2312425	PMVK	Homo sapiens phosphomevalonate kinase (PMVK), mRNA [NM_006556]	CAGGAAACCTCTGGAGACCTCATTTTCTCCATGGGGAAGACAGCCATGCTCTTCAGGAGG
A_33_P3282840	0.004955935	5.6653225E-5	down	-1.564113	RPS29	Homo sapiens ribosomal protein S29 (RPS29), transcript variant 2, mRNA [NM_001030001]	CTGCACAGTGCAGAAAGTGAATAGACAGTGAATGTGTTTGTTTTATTGGGGTTTAAATAA
A_32_P42574	0.0030109102	1.8339897E-5	down	-1.3524022	C1orf198	Homo sapiens chromosome 1 open reading frame 198 (C1orf198), transcript variant 1, mRNA [NM_032800]	ATTTCAGGAAGAGCCTCCCTTTCTTTGCGTCTCCCTTTCTTTAATTAACATTTTCAAAAG
A_23_P210482	0.008165452	1.4919975E-4	up	1.4912572	ADA	Homo sapiens adenosine deaminase (ADA), mRNA [NM_000022]	GCATGGTTGAATCTGAAACCCTCCTTCTGTGGCAACTTGTACTGAAAATCTGGTGCTCAA
A_33_P3382565	0.011366815	2.6932845E-4	up	1.5961999	KIF26B	Homo sapiens kinesin family member 26B (KIF26B), mRNA [NM_018012]	TGTCAACTTCTGCAAGGCCCATCTCATGATGATCACCTGCTTCGACATCACCTCCAGGCG
A_33_P3383436	0.0033736592	2.1805303E-5	down	-1.2611257	DHRS4L2	Homo sapiens dehydrogenase/reductase (SDR family) member 4 like 2 (DHRS4L2), transcript variant 3, mRNA [NM_001193636]	CACCTCTGCTCACCTTACTGTTCACCTCATCAAATCAGTTCTGCCCTGTGAAAAGATCCA
A_33_P3369190	0.007981163	1.4282695E-4	down	-1.3083984	PAM	Homo sapiens peptidylglycine alpha-amidating monooxygenase (PAM), transcript variant 5, mRNA [NM_001177306]	TTATTCCGGTGGTTGTCCTGCTGGCCATTGCCATATTTATTCGGTGGAAAAAATCAAGGG
A_23_P131202	0.007107877	1.1647909E-4	up	2.1504538	HES6	Homo sapiens hes family bHLH transcription factor 6 (HES6), transcript variant 1, mRNA [NM_018645]	GTGCAGGCCAAGCTGGAGAACGCCGAAGTGCTGGAGCTGACGGTGCGGCGGGTCCAGGGT
A_33_P3772150	0.007914575	1.4101136E-4	down	-4.74197	ADARB2	Homo sapiens adenosine deaminase, RNA-specific, B2 (non-functional) (ADARB2), mRNA [NM_018702]	CCCAGTGCCTCTTTTCACACAGGCCCTAGATTTCTATCTCTCTGCAGTTTATGCATCGGT
A_33_P3252141	0.0050467346	6.048287E-5	down	-1.3732669	TMX3	Homo sapiens thioredoxin-related transmembrane protein 3 (TMX3), mRNA [NM_019022]	GTCTGCATTACTAACTTGTTGAATTCATGATATTCTGCCTATGGCACAAATTGTAAACCT
A_24_P358131	0.0042597814	4.2472584E-5	up	1.4091437			GCTTTCAAGGAGGAGCTGCTCATGAAGAAGAACCATGAAGAGGAAGTAAAAGGCCTACAA
A_21_P0009949	0.0024237537	1.0726547E-5	up	3.8196764	LOC100505664	PREDICTED: Homo sapiens uncharacterized LOC100505664 (LOC100505664), misc_RNA [XR_109653]	TCTGAAGAAATAAAGCAGCAGGCACCGAGAACAAAGCCAAGGCTTTCAAAAGACAAGGAG
A_23_P100022	0.002822251	1.5323312E-5	up	3.6609335	SV2B	Homo sapiens synaptic vesicle glycoprotein 2B (SV2B), transcript variant 1, mRNA [NM_014848]	ATGTCGGCTGTGGAGGGTTAAAGGGATGAGGCTTTCCTTTGTTTAGCAAATCTGTTCACA
A_23_P415021	0.014278249	4.0100326E-4	down	-1.5704905	METTL7A	Homo sapiens methyltransferase like 7A (METTL7A), mRNA [NM_014033]	TATGGAAGCTGTGAAAATCATCACAAGTGCCTCTGAAAGCGAGTGTTAGGTTGGTTAGAG
A_33_P3225587	0.0010502836	1.4404054E-6	up	1.5124631	NAA50	Homo sapiens N(alpha)-acetyltransferase 50, NatE catalytic subunit (NAA50), mRNA [NM_025146]	CAGAAAAACCTCAAAGTTCCTTCTGGTCAGAATGCAGATGTGCAAAAGACAGACAACTGA
A_33_P3393650	0.004111762	3.8208407E-5	down	-1.2152942	PLEKHA5	Homo sapiens pleckstrin homology domain containing, family A member 5 (PLEKHA5), transcript variant 1, mRNA [NM_019012]	TTACAGATCGGAAGTGTCTTCACCAATTCAGAGAGGAGATGTGACAATAGACCGCAGACA
A_24_P152968	0.0051966785	6.411296E-5	down	-2.5588422	AKR1C1	Homo sapiens aldo-keto reductase family 1, member C1 (AKR1C1), mRNA [NM_001353]	AATGGATTCGAAATATCAGTGTGTGAAGCTGAATGATGGTCACTTCATGCCTGTCCTGGG
A_33_P3338121	9.967769E-4	1.2572916E-6	up	2.9771323	LAMB3	Homo sapiens laminin, beta 3 (LAMB3), transcript variant 2, mRNA [NM_001017402]	ACAAAGATGGTGGAGATTGGCATGCCATTGAAACTAAGAGCTCTCAAGTCAAGGAAGCTG
A_23_P29803	0.0052488646	6.620533E-5	up	1.2808567	POLR2H	Homo sapiens polymerase (RNA) II (DNA directed) polypeptide H (POLR2H), transcript variant 2, mRNA [NM_006232]	CTGTGAAAGACACAGTGGGAGAGCTGAAAATGAATCAGAAGCTTTATGTATATGATTTTT
A_23_P500464	0.0081290165	1.4753526E-4	up	9.532784	COL2A1	Homo sapiens collagen, type II, alpha 1 (COL2A1), transcript variant 1, mRNA [NM_001844]	TGCAAAATAAAATCTCGGTGTTCTATTTATTTATTGTCTTCCTGTAAGACCTTCGGGTCA
A_33_P3363245	0.0039676973	3.4638386E-5	up	2.0244122	NXPH4	Homo sapiens neurexophilin 4 (NXPH4), mRNA [NM_007224]	TCGGTGATATTTTTTCTACGCCAAAACAGACGGGAAAGGGAACAAAATAAAGTGAAATCC
A_33_P3306983	0.0058788164	8.3262756E-5	down	-1.0724483	C11orf31	Homo sapiens chromosome 11 open reading frame 31 (C11orf31), mRNA [NM_170746]	AAACTCAAATTCCCTGAGCCTCAAGAGGTGGTGGAAGAGTTGAAGAAGTACCTGTCGTAG
A_33_P3379962	0.014666192	4.178479E-4	down	-1.2181121	HLA-A	Homo sapiens major histocompatibility complex, class I, A (HLA-A), transcript variant 1 (A*03:01:0:01 allele), mRNA [NM_002116]	CATGGTGCACTGAGCTGTAACTTCTTCCTTCCCTATTAAAATTAGAACCTTAGTATAAAT
A_23_P20777	0.01867587	6.474478E-4	up	1.0925603	RBM18	Homo sapiens RNA binding motif protein 18 (RBM18), transcript variant 1, mRNA [NM_033117]	CTGTAGCAGCAAAAGCAAATTGGTCTCCACACCTAAAATCGTCTGCCTGTGTACTTTGTA
A_23_P359214	0.010228343	2.26435E-4	up	1.5155176	LINC00842	Homo sapiens long intergenic non-protein coding RNA 842 (LINC00842), long non-coding RNA [NR_033957]	GACCTGCCGGGGCCACCTGGCTGGACGAAAAAGACACACCTTGGACTTAAGCCGTGAGAA
A_23_P52939	0.015197198	4.393916E-4	up	1.7833719	SLC43A1	Homo sapiens solute carrier family 43 (amino acid system L transporter), member 1 (SLC43A1), transcript variant 1, mRNA [NM_003627]	TGAAGACAGTCCCTATCCTAGAGGGGTTGAGCTTTCTTCCTCCTTGGGTTGGAGGAGACC
A_33_P3229335	0.018036911	6.09851E-4	up	1.3215854	HIST3H2BB	Homo sapiens histone cluster 3, H2bb (HIST3H2BB), mRNA [NM_175055]	AGTACACCAGCTCCAAGTGAGGCGTTCCTCGGCGTCCTGAACCCAAAGGCTCTTTTCAGA
A_24_P7750	0.01417972	3.957209E-4	up	2.41331			GGAGTCTTGCCTGGAAGGGCTGGATATCAACTTCCTCAGGCAGCTGTATGAAGAGGAGAT
A_24_P8220	0.008987521	1.7376688E-4	down	-1.4502957	HS6ST1	Homo sapiens heparan sulfate 6-O-sulfotransferase 1 (HS6ST1), mRNA [NM_004807]	TCATCTAATTGTTTTTGTCTAGGTCGAGAATGAATGTTAGCTGATGAAATAAACCCTGAC
A_19_P00803685	0.0118246265	2.8666254E-4	up	1.3491919	ANKRD33B	Homo sapiens ankyrin repeat domain 33B (ANKRD33B), mRNA [NM_001164440]	ATATTTTCCTATTCAGACCTCAGGGCTATTTTGGGACCTACAAATAAATGGGATTCCCAG
A_33_P3308744	0.0036023657	2.584326E-5	down	-1.3764417	LAMA4	Homo sapiens laminin, alpha 4 (LAMA4), transcript variant 1, mRNA [NM_001105206]	CAACAATGCTGAGAACACGATGAAAAGCCTTCTGTCTGACGTAGAGGAATTAGTTGAAAA
A_33_P3335386	0.0098635405	2.047953E-4	up	1.2599477	FAM83G	family with sequence similarity 83, member G [Source:HGNC Symbol;Acc:32554] [ENST00000388995]	GATGTCAGGGGACATTACTGTTGCTAATAAAGTCCAAAGTGGCCAATGCCTTTCCCAAAA
A_33_P3266010	0.0025523647	1.2072869E-5	down	-1.2734591	RIN1	Homo sapiens Ras and Rab interactor 1 (RIN1), mRNA [NM_004292]	TCCAGGGAAGCTGGGGGAACTGCCACATCTGAGGAACTGGAATAAAGATGAGGGGGCTTC
A_33_P3842770	0.013712398	3.7376073E-4	up	1.325372	LOC644450	Homo sapiens hypothetical protein LOC644450, mRNA (cDNA clone IMAGE:4606942), partial cds. [BC022881]	CAAAACATTCAGGAGTTAGTGGGTCATGTTTGACAAGGGCCAATAAAGAAATATGCAAAA
A_23_P34144	0.012898839	3.388745E-4	up	1.7665584	MAGEH1	Homo sapiens melanoma antigen family H, 1 (MAGEH1), mRNA [NM_014061]	ATTTCTTCATATCTGACGTTTCTGAAACCCTTTGTGTCTGCTGTTGTGTGAAGATTGACA
A_23_P135357	0.0038463078	3.0722716E-5	up	1.2253804	RNMTL1	Homo sapiens RNA methyltransferase like 1 (RNMTL1), mRNA [NM_018146]	ACGTGGCTCTGTGTGTTTTTAAAAATTGTCCACCAAGAAGCACTTTGTGCCCAGAAAGTT
A_23_P13753	0.017200546	5.576558E-4	up	1.8116406	NFE2	Homo sapiens nuclear factor, erythroid 2 (NFE2), transcript variant 1, mRNA [NM_006163]	GGCAACAAGTGTTTGGAAGTTCCAAGGTGTGTTCAAAGAGGCTTGCCTTGAGGGAGGGCT
A_23_P86838	0.007107877	1.1619956E-4	down	-1.1257437	SLC36A4	Homo sapiens solute carrier family 36 (proton/amino acid symporter), member 4 (SLC36A4), transcript variant 1, mRNA [NM_152313]	AAAGGAGGCCTAGAAAGGTTAAGTAACTTGGTCGAGACCACTCAGCCTTGAGATCAAGAA
A_23_P401675	0.011465288	2.751469E-4	up	1.2476774	MARVELD2	MARVEL domain containing 2 [Source:HGNC Symbol;Acc:26401] [ENST00000454295]	GGACCCCCCAAATGGAACAACTTCACTTTCTCTTTTATGTATTGAGCCCTGTGTTAACAT
A_21_P0000715	0.018987082	6.619789E-4	up	1.382711	UNK	Homo sapiens unkempt family zinc finger (UNK), transcript variant 2, non-coding RNA [NR_038131]	CATCTGGTGACCTGTCACTTCAGGATTTGTGTGAATCAGACCATCTAAATATAATATAAA
A_33_P3237719	0.0049071717	5.580398E-5	up	1.2550567			AACTGCTTTCTAAAGGAACTGGGATCTGAGGGAGTTCCTAGACTTGGAGCACTAAAGACA
A_33_P3211569	0.013935121	3.834019E-4	up	1.9041538	ERBB3	Homo sapiens v-erb-b2 avian erythroblastic leukemia viral oncogene homolog 3 (ERBB3), transcript variant s, mRNA [NM_001005915]	TTTTCTAATTTCAAAGTACAGTGTACCGGAGGCCAGGCCTGATGGCTTACACCTGTAATC
A_23_P391926	0.008878073	1.6972606E-4	up	1.729997	LPHN1	Homo sapiens latrophilin 1 (LPHN1), transcript variant 1, mRNA [NM_001008701]	ATGTCTTTCTGGCTGTCTCTATGTTCCTCTTCTCTTATCCTCAACTTTCTGTCCATTCGG
A_33_P3236881	0.0041544395	3.938362E-5	up	1.4365193	MINOS1-NBL1	Homo sapiens MINOS1-NBL1 readthrough (MINOS1-NBL1), transcript variant 1, mRNA [NM_001204088]	GTCACCATTGGACAGTCTCCCTGATGGACCCTCAGTCTTCTCATGAATAAATTCCTTCAA
A_23_P306890	0.0069982847	1.12686466E-4	down	-1.3188556	POLI	Homo sapiens polymerase (DNA directed) iota (POLI), mRNA [NM_007195]	TCAATAACGGAGTAAACTGTTCCAGATAAAGCAAGAATAGTTGCAAGAAGTAAATTCTGG
A_21_P0000096	0.0065189027	1.0019792E-4	up	5.7256856	CPXM1	Homo sapiens carboxypeptidase X (M14 family), member 1 (CPXM1), transcript variant 1, mRNA [NM_019609]	GGAGGGACAAAGTGAGGAAAAGGTGCTCATTAAAGCTACCGGGCACCTTAGCTCAAAAAA
A_21_P0013677	0.00485917	5.372582E-5	up	1.4477789	ANKRD19P	Homo sapiens ankyrin repeat domain 19, pseudogene (ANKRD19P), non-coding RNA [NR_026868]	TTAATGAAGGCTGTACACTGCCAGGAAGAGGCTTGTGCCATTATTTTCCTGGAACATGGT
A_23_P155257	0.017954074	6.0341926E-4	up	1.3044574	FOXP1	Homo sapiens forkhead box P1 (FOXP1), transcript variant 1, mRNA [NM_032682]	CAACCACAGTCCAGATTTTGACCATGACAGAGATTACGAAGATGAACCAGTAAACGAGGA
A_21_P0007694	0.014331217	4.0277332E-4	down	-1.6279628	RASSF8-AS1	RASSF8 atnisense RNA 1 [Source:HGNC Symbol;Acc:48637] [ENST00000500276]	TAGCCTATCTTGCCATTTAGCCACTGTTACTGATAATTTGGATGGAAAAGAAAAATAAAT
A_33_P3259393	0.005247154	6.5595304E-5	up	2.7785265	HAPLN3	Homo sapiens hyaluronan and proteoglycan link protein 3 (HAPLN3), mRNA [NM_178232]	TCGGTTCCAAAGAATCTGTTTTGTTGTCATTTGTTTCTCCTGTTTCCCTGTGTGGGGAGG
A_32_P208350	0.0013883632	2.4345516E-6	down	-1.9457403	TDRD9	Homo sapiens tudor domain containing 9 (TDRD9), mRNA [NM_153046]	CTCTTTGGGTGATAGTCAGAGAGTGGTGTTTTTGTTCAGGTGGGAAGGATTGGAAACTCT
A_23_P152858	0.018036911	6.118563E-4	up	1.2465923	COPRS	Homo sapiens coordinator of PRMT5, differentiation stimulator (COPRS), mRNA [NM_018405]	AGTGTTCCTTATTGACAGTGTTCAATAAGGCCCCGTCATTCTCGCCAGTCTGTTGTTGTT
A_23_P422115	0.018221347	6.227126E-4	up	1.3031719	C9orf116	Homo sapiens chromosome 9 open reading frame 116 (C9orf116), transcript variant 1, mRNA [NM_001048265]	CACAGACTGCGCTGCCTTCCCTGAAAATATTATTCGTCTGCGGAGTAGGAAAATATGCAA
A_24_P103886	0.0067560175	1.06982756E-4	down	-1.2582273	IDI1	Homo sapiens isopentenyl-diphosphate delta isomerase 1 (IDI1), mRNA [NM_004508]	GTCTCGCTCCTTCAAAACAGTCTTAATTAACTTTCATATTAGCAGATTAAACTAGCAGAG
A_24_P943106	0.0026549173	1.3342871E-5	up	1.4379861	U2SURP	Homo sapiens U2 snRNP-associated SURP domain containing (U2SURP), mRNA [NM_001080415]	GGAACATGTGACTGTAAAATCTCACATTTACAAAGTGCTTGATCTCTTCATATTTCACAC
A_33_P3299170	0.0133859245	3.5853035E-4	up	1.1167727	LUC7L	Homo sapiens LUC7-like (S. cerevisiae) (LUC7L), transcript variant 2, mRNA [NM_201412]	AGAGTTGCTCCTGTGTTCCCGGGTCATGTTGAGTAGGAATAAATAAATCTGATGCTGCCT
A_23_P206022	0.017429387	5.702277E-4	down	-1.5150882	ITGA11	Homo sapiens integrin, alpha 11 (ITGA11), mRNA [NM_001004439]	GACACATGAAAGGCATCAGTCCCCCTGTGCATAGTACGACCTTTACTGTCGTATTTTTGA
A_32_P66881	0.014205982	3.967338E-4	down	-1.6710188	TLR4	Homo sapiens toll-like receptor 4 (TLR4), transcript variant 1, mRNA [NM_138554]	TTACTGAGTGTTTCAGAGTGTGTTTGGTTTGAGCAGGTCTAGGGTGATTGAACATCCCTG
A_23_P48198	0.0018445741	5.5621877E-6	down	-1.6549499	GLT8D2	Homo sapiens glycosyltransferase 8 domain containing 2 (GLT8D2), mRNA [NM_031302]	ACTCAATCACCATAGCTGATATAACTCTACCCTTAAAATATTCCCTGTATAGAAATGTGG
A_32_P14610	0.011445004	2.742885E-4	down	-1.2323706	PDLIM5	Homo sapiens PDZ and LIM domain 5 (PDLIM5), transcript variant 1, mRNA [NM_006457]	GAGAGCCTTCTCAGACATGAAGCAAGGGAAACATACTGAATAGTTTTACACAAATTTGAT
A_23_P19291	0.009602833	1.9606434E-4	up	1.2371192	TUBB2A	Homo sapiens tubulin, beta 2A class IIa (TUBB2A), mRNA [NM_001069]	ACTTCTCAGATCAATCGTGCATCCTTAGTGAACTTCTGTTGTCCTCAAGCATGGTCTTTC
A_23_P114740	4.478793E-5	2.5909508E-9	down	-2.7272425	CFH	Homo sapiens complement factor H (CFH), transcript variant 1, mRNA [NM_000186]	TTGGATTAATTTGTGAAAATGTAATTATAAGCTGAGACCGGTGGCTCTCTTCTTAAAAGC
A_33_P3348164	0.006055179	8.735669E-5	down	-1.4653014	TTLL7	Homo sapiens tubulin tyrosine ligase-like family, member 7 (TTLL7), mRNA [NM_024686]	AAATGATATCTGTGTCACGGCCAACTTCTGCATCTCGGTCACATTCCTTAAACCGTGCTT
A_33_P3408757	0.0027449648	1.4162756E-5	up	2.1128983	FOXO6	PREDICTED: Homo sapiens forkhead box O6 (FOXO6), mRNA [XM_002342102]	CGTGTCGAGGCTGTGTAGAGTGCATTGTACAGCATATTTTCATGAATAAAATTGTTTTAA
A_33_P3384543	0.017138144	5.5441307E-4	down	-1.1981255	POMGNT1	Homo sapiens protein O-linked mannose N-acetylglucosaminyltransferase 1 (beta 1,2-) (POMGNT1), transcript variant 2, mRNA [NM_001243766]	TCCAGATTTCCAAAGCTGGATAAGTTGGTCATTGATTAAAAAAGGAGAAGCCCTCTGGGG
A_32_P84009	0.0063972296	9.607381E-5	up	1.3089038	CMTM4	Homo sapiens CKLF-like MARVEL transmembrane domain containing 4 (CMTM4), transcript variant 2, mRNA [NM_181521]	GCCCTCAATTTTCCCCCTTTCATTTGAAGGACCAGTTTTTCATGGTACTTGTCTTGATCT
A_33_P3464555	0.004561502	4.773759E-5	down	-1.5486871	LOC283070	Homo sapiens uncharacterized LOC283070 (LOC283070), long non-coding RNA [NR_027322]	CGAACTTTGCCTTTTCCTTAAACACATTCCAGACCAAACACTGTTCAGTTTGTTAAAAAA
A_33_P3237874	0.0037000433	2.7419072E-5	up	1.4630551	TROAP	Homo sapiens trophinin associated protein (TROAP), transcript variant 2, mRNA [NM_001100620]	AGCTCCTGGAAAGCTCTTTGCTCTTAGAAGATCTCCCTTTCCTCCAGCAAAATGTCATCT
A_23_P201808	0.016632238	5.277578E-4	down	-1.8863856	PPAP2B	Homo sapiens phosphatidic acid phosphatase type 2B (PPAP2B), mRNA [NM_003713]	TATGGATCAACCACATGCACATCCTTACTACAGAATCCGTCCTTTCATTTCAACTTATAG
A_23_P251836	0.012853952	3.366819E-4	down	-4.7355375	NPY5R	Homo sapiens neuropeptide Y receptor Y5 (NPY5R), mRNA [NM_006174]	GTAAGTTCATACCAGGGGTCCCCACTTGCTTTGAGATAAAACCTGAAGAAAATTCAGATG
A_23_P69179	5.189935E-4	1.12515586E-7	up	1.3739524	LEPREL1	Homo sapiens leprecan-like 1 (LEPREL1), transcript variant 1, mRNA [NM_018192]	CCAGGTTGCCTAGGAGTGGGGTCCACTGATGAAAAGAGGTGTTTTGTACTTACATAAGAA
A_33_P3375496	0.017138144	5.541771E-4	up	1.0794905			TTCCTCATCTTCTTCTTTGGGAGAAGGAGTCTTTTCCTTTGATGCCTTTGAAGCTGTGGG
A_24_P686965	0.0031740698	1.9642837E-5	up	1.5852647	SH2D5	Homo sapiens SH2 domain containing 5 (SH2D5), transcript variant 1, mRNA [NM_001103161]	AGAGACCACAGTTTTCTCTTTGTTCCAATCTGCGCCACCTCGGTAGCCCCACTTTCCTTG
A_32_P69368	0.0021072412	7.766296E-6	up	1.6702194	ID2	Homo sapiens inhibitor of DNA binding 2, dominant negative helix-loop-helix protein (ID2), mRNA [NM_002166]	GTGAAACCTTGTTAACTCTTTAATTAGAGTTTTCTTGTATAGTGGCAGAGATGTCTATTT
A_33_P3381870	4.008759E-4	6.320596E-8	up	1.9891155	DMTN	Homo sapiens dematin actin binding protein (DMTN), transcript variant 1, mRNA [NM_001978]	GTGTGACCATGCTGGGGGAGGGGGACTCTGCTTGGAATTAAAAGGTTGCATTGGGTCCCT
A_33_P3219942	0.0063972296	9.5724085E-5	up	3.3239813	EML1	Homo sapiens echinoderm microtubule associated protein like 1 (EML1), transcript variant 1, mRNA [NM_001008707]	GAAACTACAAGAGACATTGAATGGGCTACCTATACCTGCACTTTGGGATTCCATGTTTTT
A_23_P97700	0.0041145575	3.882798E-5	up	2.2792122	TXNIP	Homo sapiens thioredoxin interacting protein (TXNIP), mRNA [NM_006472]	TCCACCCTTTTCTGAGAGTTATTACAGCCAGAAAGTGTGGGCTGAAGATGGTTGGTTTCA
A_24_P233786	0.0049071717	5.5230532E-5	up	1.7503158	FAM129A	Homo sapiens family with sequence similarity 129, member A (FAM129A), mRNA [NM_052966]	AAATCGACACTGTGGATTGACTTTCCCGGTCACTATATAAAGCAAATAAACTTAAAACAC
A_33_P3209741	0.018153396	6.182437E-4	down	-3.726126	KATNAL2	Homo sapiens katanin p60 subunit A-like 2 (KATNAL2), mRNA [NM_031303]	TGGATGGGCTGGCACGCTCAGAAGATCTCGTATTTGTCTTAGCAGCTTCTAACCTGCCGT
A_33_P3294608	0.01728686	5.6420185E-4	down	-1.2331259	MVP	Homo sapiens major vault protein (MVP), transcript variant 1, mRNA [NM_017458]	GACAACCACGTGGTGCCTGTACTGCGCTAACTCCTGATTAATACAATGGAAGTTTCTGGG
A_33_P3329013	0.0050319075	6.0197635E-5	up	1.3911697	SSTR2	Homo sapiens somatostatin receptor 2 (SSTR2), mRNA [NM_001050]	CAAAGTCTGGAGAAGAGGGATCATGCCTGGATATGATCTTTAGAAACAACAAAAATAGAA
A_23_P23855	0.01592661	4.8182555E-4	up	1.295982	POLR3GL	Homo sapiens polymerase (RNA) III (DNA directed) polypeptide G (32kD)-like (POLR3GL), mRNA [NM_032305]	AGAACTGGGGTTGTTAGAGCTGAGATGACTGTACACATACCCCTGCCCAATTTATATAGC
A_24_P759584	0.017042955	5.4918765E-4	down	-2.8324053	DIO3OS	Homo sapiens DIO3 opposite strand/antisense RNA (head to head) (DIO3OS), long non-coding RNA [NR_002770]	CTGTCCATCATCTTTGTCACTGTAATGCTGGGTAACAAATAAACACGAAACAATGAGTGC
A_33_P3249595	0.0053744363	6.924108E-5	up	2.3296475	BCL11A	Homo sapiens B-cell CLL/lymphoma 11A (zinc finger protein) (BCL11A), transcript variant 3, mRNA [NM_138559]	GATGACGATTGTTTATCAACGTCATCTAGAGGAATTTGCCCCAAACAGGAACACATAGCA
A_21_P0010740	0.007386974	1.2618158E-4	up	1.2800577			AGAAATAAAATTTCTAGTCCTGCCTGAAGTTTAAGCTAGCCCATGACTACACAAGTGCAA
A_23_P118427	0.0067560175	1.0655432E-4	up	1.4033679	MAP2K3	Homo sapiens mitogen-activated protein kinase kinase 3 (MAP2K3), transcript variant B, mRNA [NM_145109]	TATCCCGGCTTTGGTGCGGGGTACACAAGAGGGGATGAGTTGTGTGAATACCCCAAGACT
A_33_P3329974	0.005244312	6.532918E-5	up	2.5404754	CGN	Homo sapiens cingulin (CGN), mRNA [NM_020770]	ATTCCTATATTCTTCTGCAAATCAAACGTTCTTTCCCAATCCAATCCAGCCTTGGTTTTA
A_33_P3211356	0.010083365	2.1667808E-4	up	3.546958	DPP10	Homo sapiens dipeptidyl-peptidase 10 (non-functional) (DPP10), transcript variant 4, mRNA [NM_001178037]	GAGATGCTCTTTTCCAAGCTATAATGGATGCTTTGTTTAATGAGCCAAATATGATGAAAC
A_23_P204630	0.005828574	8.1215665E-5	down	-1.8248471	NTN4	Homo sapiens netrin 4 (NTN4), mRNA [NM_021229]	ATGTAGACATATGCTTGGCTAAAGGGGAAATGGACTTTAAATTTTAAAGAGCTCATTTGC
A_23_P23924	0.011840756	2.8827292E-4	up	1.0808903	CAPN2	Homo sapiens calpain 2, (m/II) large subunit (CAPN2), transcript variant 1, mRNA [NM_001748]	AGAAGTTCTTATAGAAAGGACACAAGTTTGTTTCCTGGCTTTACCTTGGGAAAATGCTAG
A_32_P47554	0.014230383	3.9810626E-4	down	-1.0959303	HINT1	Homo sapiens histidine triad nucleotide binding protein 1 (HINT1), transcript variant 1, mRNA [NM_005340]	CTCCTGGTTAAGCACGTTTTGGGGATAATTTTCTCTTCTTTAGGCAATGATTAAGTTAGG
A_33_P3281616	0.017245319	5.6102587E-4	down	-1.076639	CDPF1	Homo sapiens cysteine-rich, DPF motif domain containing 1 (CDPF1), mRNA [NM_207327]	TTAGAATTCTGAGAGGCAGGAACTGCTCTGTCTTTGTAACTACTCAAGGCCAACTGTCAC
A_19_P00319971	0.011840756	2.8798613E-4	down	-1.2427111	SMIM2-AS1	Homo sapiens SMIM2 antisense RNA 1 (SMIM2-AS1), transcript variant 1, long non-coding RNA [NR_104064]	TCCATCCTGGCTCATCTCCTCTGTGTTCTCATAGCATCATATTATAGAATGGATCACAAA
A_32_P20454	0.017668705	5.816917E-4	down	-1.3212564	COPA	Homo sapiens coatomer protein complex, subunit alpha (COPA), transcript variant 1, mRNA [NM_001098398]	GTAGAGTGACATTACTGTGCCTTCGATTAAAATAAGTACTTTTTTGCGTGTTAAATTCAT
A_23_P58266	0.007595936	1.3079194E-4	down	-2.2096307	S100P	Homo sapiens S100 calcium binding protein P (S100P), mRNA [NM_005980]	CCAAAAGTGTTTGTTGGCAATTATTCCCCTAGGCTGAGCCTGCTCATGTACCTCTGATTA
A_24_P177279	0.004561502	4.7577327E-5	up	2.1756685	CSDC2	Homo sapiens cold shock domain containing C2, RNA binding (CSDC2), mRNA [NM_014460]	GGTGGGACCCTTATGAGACTCAGTCTGTGAGTAAAACTGGGGGCTCAAATGCCCAGGATG
A_23_P90845	0.017556852	5.7612796E-4	down	-1.3194654	TIA1	Homo sapiens TIA1 cytotoxic granule-associated RNA binding protein (TIA1), transcript variant 2, mRNA [NM_022173]	GCTACAGGGAGTGTAGTAAAGCCGTTGTTTACTTAAAGATTTATCAAATCAGTCAGTGCA
A_33_P3233580	0.012182763	3.0678432E-4	down	-1.723699	KIAA1217	Homo sapiens KIAA1217 (KIAA1217), transcript variant 6, mRNA [NM_001282769]	CATGAAGAAAGTCTAAATAAACCTTTGTTACACTTTTTTACCACGCTTTTGCATGCTTGC
A_33_P3229953	0.0058282875	8.1096805E-5	up	1.9547845	EEF1A2	Homo sapiens eukaryotic translation elongation factor 1 alpha 2 (EEF1A2), mRNA [NM_001958]	TCGGTCAGCGACTGGATGCTCGCCATCAAGGTCCAGTGGAAGTTCTTCAAGAGGAAAGGC
A_21_P0011052	0.0047154357	5.1393126E-5	down	-1.0601538	XLOC_014512	BROAD Institute lincRNA (XLOC_014512), lincRNA [TCONS_l2_00005785]	ATGGGGGTACCCAAATCCGAAGTCAGTAAATGAACTCGTCTACAAGCGTGATTATGGCAA
A_33_P3387621	0.006355572	9.444611E-5	up	1.4701784	RHPN2	Homo sapiens rhophilin, Rho GTPase binding protein 2 (RHPN2), mRNA [NM_033103]	ATCTGCTGCTCCTAGGGCCATGCTTGTATACATATTTAAATAAACATATTCATTTACCCG
A_23_P85682	0.0078140395	1.370641E-4	down	-1.2946041	NFIA	Homo sapiens nuclear factor I/A (NFIA), transcript variant 2, mRNA [NM_005595]	TTTTCTAGTCCTTTCACCCCAGGACTCTAAATTATTGGGGTAAAAAACAGCCTTGCAAGA
A_33_P3416321	0.011366815	2.693713E-4	down	-1.3403903	SLC17A5	Homo sapiens solute carrier family 17 (acidic sugar transporter), member 5 (SLC17A5), mRNA [NM_012434]	ATCATATTTTTCCAGTGGACCATCCTCCAGTGGCTGTGGTTGTTGAGCATGCTTTCAGAA
A_33_P3331366	0.014801526	4.238676E-4	up	1.2190076	TRIM25	Homo sapiens tripartite motif containing 25 (TRIM25), mRNA [NM_005082]	CTGTGTCTTCCTTGGCTTGTGGAGCTGATTTGTATCCTTTATAATAAAACTAATCATAAG
A_23_P202206	0.015420298	4.5495943E-4	up	1.5783833	GSTO2	Homo sapiens glutathione S-transferase omega 2 (GSTO2), transcript variant 1, mRNA [NM_183239]	ATCAGAACACCACCTTCTTTGGTGGAACCTGTATATCCATGATTGATTACCTCCTCTGGC
A_33_P3328251	8.043037E-4	4.1860685E-7	up	932.58124			TTCCCAAAAGCACGCATTGCAGCTCTGATGCAGTCTATCACTGGCAGTTCGGTGTCTGAG
A_23_P140748	0.0053402213	6.825894E-5	up	2.0185058	NDRG4	Homo sapiens NDRG family member 4 (NDRG4), transcript variant 3, mRNA [NM_022910]	GTCCTCCCATGTGTGGTGTTCTTCTGGAGGTTGTCTCTTTGGTCAAGGTGAACTTTTAAT
A_33_P3285565	0.0061357548	8.94709E-5	up	4.3915286	CLDN3	Homo sapiens claudin 3 (CLDN3), mRNA [NM_001306]	GGGACCGGCAGCCCTGGAAGGGGCACTTGATATTTTTCAATAAAAGCCTTTCGTTTTGCA
A_23_P29975	0.01255045	3.2230112E-4	down	-2.2317498	C4orf19	Homo sapiens chromosome 4 open reading frame 19 (C4orf19), transcript variant 2, mRNA [NM_018302]	ACACCTTGACCTTAACTTTTTTACATTATTACTTTTAAATCTCCTTTGGGATTGGGGAGG
A_24_P376391	0.006565009	1.0180596E-4	up	1.5109699	PLXND1	Homo sapiens plexin D1 (PLXND1), mRNA [NM_015103]	CGAGGCTGTAGCTGGGCTACTTGATCTTGCTGAAAGTGTTTCTAAAGATAGCACCACTTT
A_32_P35969	0.01986484	7.121572E-4	up	1.3738688	CHRNA7	Homo sapiens cholinergic receptor, nicotinic, alpha 7 (neuronal) (CHRNA7), transcript variant 2, mRNA [NM_001190455]	TCCTGTTCCATTGTGTCATCCAACAACTGCTCAGAGCTCAAAATTATAGAAGGCTTCTGA
A_23_P140614	0.0041066953	3.8040693E-5	up	1.9209647	GOLGA8O	Homo sapiens golgin A8 family, member O (GOLGA8O), mRNA [NM_001277308]	AGGCAGACCTGAGTGAGCTGGTGAAAAAACAAGAACTTCGCTTCATTCAATACTGGCAAG
A_23_P29594	0.018943341	6.600806E-4	up	1.4299558	RPL39L	Homo sapiens ribosomal protein L39-like (RPL39L), mRNA [NM_052969]	GAGAGAAGCAAGCATCTTTGCCTCTTTGGAGTAGGAAATTCAGACTTGAAAAAGTGGTGT
A_21_P0006078	0.0058234273	8.057009E-5	up	3.3977125		PREDICTED: Homo sapiens uncharacterized LOC100996870 (LOC100996870), misc_RNA [XR_159518]	CCTAAGTATGGTGAAGCAGAATTGAATTCTACAAAAGTCTTTCATCTGTTTTCCTATGGA
A_24_P143492	0.007265843	1.205747E-4	up	2.237997	BCAS4	Homo sapiens breast carcinoma amplified sequence 4 (BCAS4), transcript variant 3, mRNA [NM_001010974]	GATACTTCACAGATCCTGGAGGAAAACATCCCAGTCCTTAAGGCCAAACTGACAGAAATG
A_23_P27013	0.0046695285	5.0244063E-5	up	2.4123006	HOXB9	Homo sapiens homeobox B9 (HOXB9), mRNA [NM_024017]	TTCTTTGGGGGTGATTGTCTCGCTTGTTTTCAGTTGTCGATTATATGGGAGGGTTCTGGG
A_23_P91081	5.1473785E-4	1.01448165E-7	up	7.4941154	EPCAM	Homo sapiens epithelial cell adhesion molecule (EPCAM), mRNA [NM_002354]	TCAAAATATAAGCAGCTTGAAACTGGCTTTACCAATCTTGAAATTTGACCACAAGTGTCT
A_33_P3241428	0.014578076	4.139714E-4	up	2.030854	OBSL1	Homo sapiens obscurin-like 1 (OBSL1), transcript variant 1, mRNA [NM_015311]	ACAGCTTGGAAGGCGTTTGCCCTTACCCTGGGCAGGGGTAGAGAGACAAGGAACAATAAA
A_23_P211957	0.0053485604	6.8623995E-5	down	-1.3010911	TGFBR2	Homo sapiens transforming growth factor, beta receptor II (70/80kDa) (TGFBR2), transcript variant 1, mRNA [NM_001024847]	CATGCTGATACCATCCCAATAGCTGTTGCCCATTGACCTCTAGTGGTGAGTTTCTAGAAT
A_33_P3364741	0.015387979	4.5309606E-4	down	-1.1308572	MRC2	Homo sapiens mannose receptor, C type 2 (MRC2), mRNA [NM_006039]	ATGTGAACATGGACTCGAAGACATGGCCCTTTCTCTGTAGTTGATTTTTTAAATGTGCCA
A_24_P268786	0.017279882	5.6363357E-4	up	1.2893059	MYNN	Homo sapiens myoneurin (MYNN), transcript variant 1, mRNA [NM_018657]	TGCAGAGGATCATACTTTGAGTGAACAGGATTCCATACAAAAAAGTCCTTTATCAGAAAC
A_32_P94160	0.019506367	6.9123256E-4	down	-1.4490951	PRKAA2	Homo sapiens protein kinase, AMP-activated, alpha 2 catalytic subunit (PRKAA2), mRNA [NM_006252]	CTGATAGGATGAGTATCTTGATTTTTAGGTAAGATCACAGTTTCACAAATTGTGGTGTTG
A_21_P0005182	0.01836227	6.318714E-4	up	1.333152	XLOC_005918	BROAD Institute lincRNA (XLOC_005918), lincRNA [TCONS_00012825]	TGACCTCAACCGTGCATATCAGATCAGCTAATGTCTGTTGGATAATTTTATGTGACGGGC

## Sheet: FC > 1.5 U shRNA Ki-67 vs CTRL
ProbeName	FC ([shRNA Ki-67] vs [shRNA CTRL])	Regulation ([shRNA Ki-67] vs [shRNA CTRL])	GeneSymbol	Description	Sequence
A_23_P101374	1.540625	up	CYP2S1	Homo sapiens cytochrome P450, family 2, subfamily S, polypeptide 1 (CYP2S1), mRNA [NM_030622]	AGTCACCCCTTTTTAAGCACCCTGATTCTACCAAATGCAAACACATCTGGGTCTGCGATT
A_33_P3311205	1.5115803	up	PRPF40B	Homo sapiens PRP40 pre-mRNA processing factor 40 homolog B (S. cerevisiae) (PRPF40B), transcript variant 1, mRNA [NM_001031698]	GGAGCTCCAACAGGCAGAGCTCCCTAACCGTTCCCCAGGCTTTGGAATCAAGAAGGAGAA
A_23_P354791	1.5046291	up	NAV2	Homo sapiens neuron navigator 2 (NAV2), transcript variant 1, mRNA [NM_182964]	TGCAAGTACCACAAATGCCCTTACATAATTGGCACAATGAACCAGGCTACCTCTTCGACT
A_32_P231086	1.554241	up	GOLGA6L9	Homo sapiens golgin A6 family-like 9 (GOLGA6L9), mRNA [NM_198181]	ATAAATGACTAGGAATGACCTTCAGATAGCGTTTAGCAACTGTAACCAATCTGACAATAA
A_23_P31073	2.016573	up	MYB	Homo sapiens v-myb avian myeloblastosis viral oncogene homolog (MYB), transcript variant 2, mRNA [NM_005375]	ATGCAAGATGGCCAGCACTGAACTTTTGAGATATGACGGTGTACTTACTGCCTTGTAGCA
A_23_P13907	2.2363515	up	IGF1	Homo sapiens insulin-like growth factor 1 (somatomedin C) (IGF1), transcript variant 4, mRNA [NM_000618]	CAAGTAGAGGGAGTGCAGGAAACAAGAACTACAGGATGTAGGAAGACCCTCCTGAGGAGT
A_24_P388528	3.2260363	up	ST6GAL1	Homo sapiens ST6 beta-galactosamide alpha-2,6-sialyltranferase 1 (ST6GAL1), transcript variant 1, mRNA [NM_173216]	ATGCAAATTATGATATGGACGTTATCATTGGTCTGGTGAGATGTTTCATATTTGTGACAG
A_23_P120103	6.660331	up	KCNS3	Homo sapiens potassium voltage-gated channel, delayed-rectifier, subfamily S, member 3 (KCNS3), transcript variant 1, mRNA [NM_002252]	TGACTGAGACGACATGCATGTAAGATCCACAAAATGAGACAATGCATGTAAATCCATGCT
A_32_P72341	1.9819567	up	TRIM59	Homo sapiens tripartite motif containing 59 (TRIM59), mRNA [NM_173084]	AGTAGGCCAAGATTAATGTTGGTAAGGGTTTGTAATCTGTAAGAATGCTAAAAACGTAAG
A_33_P3397865	2.1249642	up	TNNT1	Homo sapiens troponin T type 1 (skeletal, slow) (TNNT1), transcript variant 1, mRNA [NM_003283]	GGAAGCCTGGGAGTGTTTGTCCCATCGGTAGCTTGAAATAAACGCTCCCCTCAGACACCC
A_23_P115922	1.5104603	up	EIF4EBP2	Homo sapiens eukaryotic translation initiation factor 4E binding protein 2 (EIF4EBP2), mRNA [NM_004096]	GTTGATGTCTCAGGAATAAGCTGGATCTCCAATGTTTTGGGGATGCTTTGAGTCTCAAAA
A_23_P83838	1.7910968	up	CA8	Homo sapiens carbonic anhydrase VIII (CA8), mRNA [NM_004056]	AGAAAAGGAAACTTTTGAGCTGCACCTTCAGTTTATCCTCAAAGCCTGCGTTGTTTGTCT
A_23_P24104	1.7695591	up	PLAU	Homo sapiens plasminogen activator, urokinase (PLAU), transcript variant 1, mRNA [NM_002658]	CTGTGACCAGCACTGTCTCAGTTTCACTTTCACATAGATGTCCCTTTCTTGGCCAGTTAT
A_23_P108673	1.9272916	up	EVA1A	Homo sapiens eva-1 homolog A (C. elegans) (EVA1A), transcript variant 2, mRNA [NM_032181]	CCTCAGGGATTAAAATCCTACTTTTTAGTGTAGTTCCCACCTCATTCATGAAAATGAATA
A_23_P145529	1.6802305	up	PKIB	Homo sapiens protein kinase (cAMP-dependent, catalytic) inhibitor beta (PKIB), transcript variant 1, mRNA [NM_181795]	ATGAAGGCTCATAATCTATCAAGAGTGCTGAATTTCTGCATGTTGAAAGACTTAGTGGTT
A_32_P176911	1.8383061	up	LINC00239	Homo sapiens long intergenic non-protein coding RNA 239 (LINC00239), long non-coding RNA [NR_026774]	GGACTCTGGAGATAAAACCTCATTGCAAGGCTACCTTTGCCACTGTATCTTAGCAGCTTT
A_24_P383523	1.7447013	up	SAMD4A	Homo sapiens sterile alpha motif domain containing 4A (SAMD4A), transcript variant 1, mRNA [NM_015589]	CCATCTTCAGGGTTGCACAGAATCCTCCAAGATACTTTGCAGCCTTTTTTCCCCCTGGTC
A_23_P113613	6.0419984	up	CDCP1	Homo sapiens CUB domain containing protein 1 (CDCP1), transcript variant 1, mRNA [NM_022842]	CTTAATTTGTGGATGATACAGAAAGCCAGGCTTTGGGATACAAGTTCTTTCCTCTTCATT
A_33_P3227944	2.6886375	up	CRHR1-IT1	Homo sapiens CRHR1 intronic transcript 1 (non-protein coding) (CRHR1-IT1), transcript variant 2, long non-coding RNA [NR_026906]	CACTGTGCTAAACGCCTTCCATGTATTCATCTCATTAGTAAACATTTCTGAAACTATTCT
A_23_P134454	1.5266893	up	CAV1	Homo sapiens caveolin 1, caveolae protein, 22kDa (CAV1), transcript variant 1, mRNA [NM_001753]	ATTCCTCCTGCTCATATTGTGATTCTCACTTTGGGGACTTTTCTTAAACCTTCAGTTATG
A_21_P0013271	2.2170806	up	SMKR1	Homo sapiens small lysine-rich protein 1 (SMKR1), mRNA [NM_001195243]	ACTTCCTCTGTTATGCCAGATATGGTTAGCCACTTTGGTTTTTTAGGAGCTATAGGATGG
A_33_P3262833	2.484562	up	GOLGA8EP	Homo sapiens golgin A8 family, member E, pseudogene (GOLGA8EP), non-coding RNA [NR_033350]	TCAGCCAAGTATTGGTATTCTTCCTCATTCGGTATAAGGCAGCTTTCAATTTGCTTAGAA
A_24_P379233	5.52748	up	GJB3	Homo sapiens gap junction protein, beta 3, 31kDa (GJB3), transcript variant 1, mRNA [NM_024009]	ACCCCACTCTGAGTTCACTAAGTTATGCAACTTTCGTTTTGGCAGATATTTTTTGACACT
A_33_P3408320	1.8790027	up	CERS1	Homo sapiens ceramide synthase 1 (CERS1), transcript variant 2, mRNA [NM_198207]	CCATCAGATTCGCCTTGGGTGTAGATGAAACAGAAATAAAAGAATCAAAGACGACTCAAG
A_23_P211522	1.7534363	up	SYNGR1	Homo sapiens synaptogyrin 1 (SYNGR1), transcript variant 1c, mRNA [NM_145738]	AGGACCGCAAGAAAGCCGTCCTGTCCGACATCGGTGTCTCGGCCTTCTGGGCTTTCCTCT
A_21_P0007443	7.389162	up	XLOC_009231	BROAD Institute lincRNA (XLOC_009231), lincRNA [TCONS_00019958]	GAGGTGATGAATGATGACCCTTATTTCATTTCTCTTTTATTCTTGGTTAGCCTGGTTAGA
A_23_P103617	4.142236	up	ANXA9	Homo sapiens annexin A9 (ANXA9), mRNA [NM_003568]	TTCTTTAAAATCCCTTAATTTTCCCATCTCAAAATTATATCTGTACCTGGGTCATCCAGC
A_23_P205713	3.1909506	up	STXBP6	Homo sapiens syntaxin binding protein 6 (amisyn) (STXBP6), mRNA [NM_014178]	GCACAAGCTTGCCATGAAGCACAAATGTTGAGAAACTGCCTATCCTGGTGACTCTTCTTA
A_24_P331704	1.8538852	up	KRT80	Homo sapiens keratin 80 (KRT80), transcript variant 1, mRNA [NM_182507]	CCAAGGGAGCAAATCCTCAGTGGGGATACAAGACATATAAAGTATATATTATTTTTTCAT
A_23_P49816	1.7557229	up	ADAP2	Homo sapiens ArfGAP with dual PH domains 2 (ADAP2), mRNA [NM_018404]	AATGGAGGCATTGCAATGAAAAGGCACCCACAGCATCATGCAAGTGGCATCTTGTAAAAA
A_24_P80204	2.0188448	up	MALL	Homo sapiens mal, T-cell differentiation protein-like (MALL), mRNA [NM_005434]	TCACCAGGACCTCAACGGGCAAAGTTGTGCACACTAAAATATCAAATCAAGGTGCTTGGT
A_23_P161297	14.2163315	up	OGDHL	Homo sapiens oxoglutarate dehydrogenase-like (OGDHL), transcript variant 1, mRNA [NM_018245]	GTTCAGCAGTAACAGCCAGGTGAAGCGAACCTGCTGGGTGATTTGTTTGCGCTCTGTTTT
A_21_P0014115	1.6391442	up		Homo sapiens cDNA FLJ26015 fis, clone MPC03596. [AK129526]	CTACTTTTGTAAGGTCCTGTTTCTTTGGCTACATCTGATTACAGTAAACATAGGAAGTTT
A_33_P3243449	6.5956364	up	CD70	Homo sapiens CD70 molecule (CD70), mRNA [NM_001252]	TGGGGCGTAGTGGTGGCAGGACAAGAGAAGGCATTGAGCTTTTTCTTTCATTTTCCTATT
A_21_P0011363	1.6663377	up		Homo sapiens family with sequence similarity 7, member A1, mRNA (cDNA clone IMAGE:6171114). [BC070492]	CCTTTGCCTTAAGACCTAAAGAGGTTTTGGAACATCAGCAAGCATCCATCTCGAGGTAAA
A_23_P57709	1.5822481	up	PCOLCE2	Homo sapiens procollagen C-endopeptidase enhancer 2 (PCOLCE2), mRNA [NM_013363]	TATCTGATTGGAAACCTGCCGACTTAGTGCGGTGATAGGAAGCTAAAAGTGTCAAGCGTT
A_23_P77493	1.5108024	up	TUBB3	Homo sapiens tubulin, beta 3 class III (TUBB3), transcript variant 1, mRNA [NM_006086]	TTGTTTTTTACTGGTTTGTGTTTATATTTTCGGGGATACTTAATAAATCTATTGCTGTCA
A_23_P104438	3.2785838	up	MYPN	Homo sapiens myopalladin (MYPN), transcript variant 1, mRNA [NM_032578]	AAAGAAATCCTCTGTGGGGTCACTTTAAAAACTACTAGCTTCAACTACCACTTACAAAAT
A_23_P113111	2.0000966	up	AR	Homo sapiens androgen receptor (AR), transcript variant 1, mRNA [NM_000044]	AGCCACACAAACGTTTACTTATCTTATGCCACGGGAAGTTTAGAGAGCTAAGATTATCTG
A_23_P303145	3.1402566	up	FGFR2	fibroblast growth factor receptor 2 [Source:HGNC Symbol;Acc:3689] [ENST00000359354]	AAGTGGACGTGGTATGAAATGTCTGACATTTTGGAAGCTGAGATTACTCTGAAAATGTTA
A_33_P3229301	2.6830494	up	DKFZp434J0226	Homo sapiens uncharacterized LOC93429 (DKFZp434J0226), long non-coding RNA [NR_027003]	CCAATAAACAAGAAAGCAGAACACAAAGAGCTGTGATGGAGTGGATCTTATGTAGTAAGA
A_23_P101013	2.0332646	up	TMC6	Homo sapiens transmembrane channel-like 6 (TMC6), transcript variant 2, mRNA [NM_007267]	CAGATCAGCAATGAGGGTGAGGACAAAATCTTCTTAATCAACAAGCTTCACTCCATCTAC
A_23_P17821	2.2700047	up	PLA2G3	Homo sapiens phospholipase A2, group III (PLA2G3), mRNA [NM_015715]	TACATGTATGTCCGTGTTGCAAAAATAATACATGCCTCAAAAACCTGCCTAGGGGAGCCC
A_33_P3417589	1.9836472	up			AAGATCAAGACCTGCGATGGGAAGCTGGTATCCGAGTCCTCTGATGTCCTTCCTAAGTGA
A_33_P3379922	1.7621644	up	PROC	Homo sapiens protein C (inactivator of coagulation factors Va and VIIIa) (PROC), mRNA [NM_000312]	TACACCAAAGTCAGCCGCTACCTCGACTGGATCCATGGGCACATCAGAGACAAGGAAGCC
A_24_P339514	5.5413013	up	CYP2B6	Homo sapiens cytochrome P450, family 2, subfamily B, polypeptide 6 (CYP2B6), mRNA [NM_000767]	GGTTCCCTGAGCTGTGGGATTCTGCACTGGTGCTTTGGATTCCCTGATATGTTCCTTCAA
A_33_P3316273	9.05222	up	CCL3	Homo sapiens chemokine (C-C motif) ligand 3 (CCL3), mRNA [NM_002983]	TGCTTTTGTTCAGGGCTGTGATCGGCCTGGGGAAATAATAAAGATGCTCTTTTAAAAGGT
A_33_P3313075	2.5699587	up			GCGCGAAGCTGTGGAATCCAGGCAGGAAGCGGCTGATCCTCAGCGCCCAGCCGCAGTGCT
A_23_P374082	2.6735175	up	ADAM19	Homo sapiens ADAM metallopeptidase domain 19 (ADAM19), mRNA [NM_033274]	ACACCGTCCACTGTGCGTTTGTATGTGTCTGGGATCCAGGGCAATGTGAATTTTCTTTTT
A_24_P163113	1.5309987	up	CDV3	Homo sapiens CDV3 homolog (mouse) (CDV3), transcript variant 2, mRNA [NM_017548]	GCCACCAAGGCTGTGACGAAGGACGAAGATGAATGGAAAGAATTGGAGCAAAAAGAGGTT
A_33_P3214650	1.5775051	up	TAP2	Homo sapiens transporter 2, ATP-binding cassette, sub-family B (MDR/TAP) (TAP2), transcript variant 1, mRNA [NM_000544]	GCTCAGTATTTTCGCAAACAGCAGCTGTCTAAGTTCACTGTTCTGAACTTTATTTTTTAA
A_23_P17663	4.3844438	up	MX1	Homo sapiens myxovirus (influenza virus) resistance 1, interferon-inducible protein p78 (mouse) (MX1), transcript variant 2, mRNA [NM_002462]	CAGCTTATTTCCTCATTTTTATAATGTCCCTTCACAAACCCAGTGTTTTAGGAGCATGAG
A_33_P3209960	2.153429	up	RASGRP2	Homo sapiens RAS guanyl releasing protein 2 (calcium and DAG-regulated) (RASGRP2), transcript variant 2, mRNA [NM_153819]	TCTGCTAGACCAAGAAGGGAACCGACGGCACAGCAGCCTAATCGACATAGACAGCGTGTG
A_21_P0010490	3.0174437	up	XLOC_014511	BROAD Institute lincRNA (XLOC_014511), lincRNA [TCONS_00030031]	TGGAGTCCAAAAGCAGCAACTATGTTTATTTCTCCATAGAAAATAAATGTTCACCAAGGC
A_23_P110052	2.3972647	up	FOXL2	Homo sapiens forkhead box L2 (FOXL2), mRNA [NM_023067]	GCCCGAAAACCATAGACCTGGTTGTACTGTAGCTTGTTGTTTGGGGGACCAAATTTTCTA
A_23_P159937	1.6151892	up	SLC6A8	Homo sapiens solute carrier family 6 (neurotransmitter transporter), member 8 (SLC6A8), transcript variant 1, mRNA [NM_005629]	AGTGTGAATTTATAGATCTAACTTTCATAGGCAAAACAAAAGCTTCGAGCTGTTGCGTGT
A_21_P0008663	2.2359188	up	XLOC_011331	BROAD Institute lincRNA (XLOC_011331), lincRNA [TCONS_00023486]	CCACACTGACACTTGCTGTGCCATTGATTTGACTTTTCTCCTATCTTAACAATAACAAAT
A_23_P89780	2.124254	up	LAMA3	Homo sapiens laminin, alpha 3 (LAMA3), transcript variant 1, mRNA [NM_198129]	TCTAATTTTGAATTCTGACCATGGATACCCATCACTTTGGCATTCAGTGCTACATGTGTA
A_23_P120472	1.5811294	up	TFAP2C	Homo sapiens transcription factor AP-2 gamma (activating enhancer binding protein 2 gamma) (TFAP2C), mRNA [NM_003222]	TGTTCAAACGGGGGCCTTCTGGTTTTAGGAAACTTGTAGAAACGAAGCCTGCTGATTGAT
A_23_P43476	1.7259718	up	VLDLR	Homo sapiens very low density lipoprotein receptor (VLDLR), transcript variant 1, mRNA [NM_003383]	TCTAAACAAATAATACCCCCGTCGGAATGGTAACCGAGCCAGCAGCTGAAGTCTCTTTTT
A_23_P62188	4.165875	up	ZC4H2	Homo sapiens zinc finger, C4H2 domain containing (ZC4H2), transcript variant 1, mRNA [NM_018684]	GGGAGGGGGATATTTTTCCTTCCTTAAGTAGTTTTACATTGCCACAGTGTGTATGTGTTC
A_23_P329870	1.7710774	up	RHBDF2	Homo sapiens rhomboid 5 homolog 2 (Drosophila) (RHBDF2), transcript variant 1, mRNA [NM_024599]	AAAGTAACGCTAACTTTGTAGGGACGATGTCTCATGGATTAAATAATATTCTTTATGGCA
A_24_P75680	3.0608764	up	SLC4A8	Homo sapiens solute carrier family 4, sodium bicarbonate cotransporter, member 8 (SLC4A8), transcript variant 4, mRNA [NM_001258402]	TTGCCTCCCTAATTTGCATTATTTTCATCTATGAAGCAATAGAAAAACTGATTCACCTGG
A_23_P349463	4.185564	up	CHP2	Homo sapiens calcineurin-like EF-hand protein 2 (CHP2), mRNA [NM_022097]	AAGTCTGGACTCTTAAATGGGTTTTTGCTGATTTCCTGGGTGCATGCTAGGATGATGGGG
A_23_P111804	1.5454968	up	PARP12	Homo sapiens poly (ADP-ribose) polymerase family, member 12 (PARP12), mRNA [NM_022750]	TGATTCGGTTTCTCAGAGTCTCATGGCATCATAGTTTTTCCAGAATGACACAGTAGCCAC
A_33_P3293675	2.3505802	up	SLC12A7	Homo sapiens solute carrier family 12 (potassium/chloride transporter), member 7 (SLC12A7), mRNA [NM_006598]	CTACCTGGGCACGACGTTTGCAGGGGCCATGTATATTTTGGGGACCATCGAGATTTTTCT
A_23_P162589	1.8213048	up	VDR	Homo sapiens vitamin D (1,25- dihydroxyvitamin D3) receptor (VDR), transcript variant 2, mRNA [NM_001017535]	CAAGCGAGGTCAACAGAGAAGGCAGGAATGTGTGGCAGATTTAGTGAAAGCTAGAGATAT
A_23_P215634	2.463476	up	IGFBP3	Homo sapiens insulin-like growth factor binding protein 3 (IGFBP3), transcript variant 1, mRNA [NM_001013398]	AGCCTCCACATTCAGAGGCATCACAAGTAATGGCACAATTCTTCGGATGACTGCAGAAAA
A_23_P16252	4.384819	up	KLK1	Homo sapiens kallikrein 1 (KLK1), mRNA [NM_002257]	GTCAGAGTGCTGTCTTATGTGAAGTGGATCGAGGACACCATAGCGGAGAACTCCTGAACG
A_23_P312150	3.040657	up	EDN2	Homo sapiens endothelin 2 (EDN2), mRNA [NM_001956]	TTATTTTAATGTATTTTTTAGACCCTCTATTTACCTGCGAACTTGTGTTTATAATAAATG
A_23_P339818	2.4842012	up	ARRDC4	Homo sapiens arrestin domain containing 4 (ARRDC4), mRNA [NM_183376]	GCACAGTAAGAAACAATAGGCAAGCGTTATGTTTTTGGTAAGTTAACTATGAAAGCTTTC
A_23_P130149	1.5725162	up	ENO3	Homo sapiens enolase 3 (beta, muscle) (ENO3), transcript variant 1, mRNA [NM_001976]	CTCGGAGCGTCTGGCCAAATACAACCAACTCATGAGGATCGAGGAGGCTCTTGGGGACAA
A_24_P81900	1.8687236	up	SLC2A3	Homo sapiens solute carrier family 2 (facilitated glucose transporter), member 3 (SLC2A3), mRNA [NM_006931]	ACTGGATGAAATAACTCCTTCTTGTAGTAGTCTCATTACTTTTGAAGTAATCCCGCCACC
A_24_P59667	2.1396608	up	JAK3	Homo sapiens Janus kinase 3 (JAK3), mRNA [NM_000215]	TGAGGCCTCAGTACAGAGGGGGCTCTGGAAATGTTTGTTGACTGAATAAAGGAATTCAGT
A_23_P259413	1.5733986	up	CDV3	Homo sapiens CDV3 homolog (mouse) (CDV3), transcript variant 2, mRNA [NM_017548]	GCCAGGTTAACCACAACAAGGAAAACACCACAAGGACCACCAGAAATCTACAGTGATACA
A_23_P259071	1.8601805	up	AREG	Homo sapiens amphiregulin (AREG), mRNA [NM_001657]	TGAGTCGGTCCTCTTTCCAGTGGATCATAAGACAATGGACCCTTTTTGTTATGATGGTTT
A_23_P386320	1.7797192	up	MFI2	Homo sapiens antigen p97 (melanoma associated) identified by monoclonal antibodies 133.2 and 96.5 (MFI2), transcript variant 2, mRNA [NM_033316]	GCAGTGAAAGCTTTCATGACCATACAAATTATCTTTTTTCTTCCTATTTCCTTGTAGAGG
A_23_P405885	1.9517063	up	DPPA2	Homo sapiens developmental pluripotency associated 2 (DPPA2), mRNA [NM_138815]	CTAAAGAATCCCTTTCTGTATGTCTGAAAACCCATTAAAATAAAGTCACTGCAATTGGCA
A_23_P352950	1.5121211	up	PNMA5	Homo sapiens paraneoplastic Ma antigen family member 5 (PNMA5), transcript variant 3, mRNA [NM_052926]	GCTCCCCAGGAAGCTTTGTGCTTTGGCGTTCCACCCCTGCTGTTACTCGTGACTCAGTTT
A_33_P3387616	1.7295698	up	RHPN1	Homo sapiens rhophilin, Rho GTPase binding protein 1 (RHPN1), mRNA [NM_052924]	CAAGGTCACGCAGGTCTCCCCAGCACGTGTTAATTTGGTTAATAAAACTGTGGATCAAGG
A_23_P102364	1.8950324	up	NGEF	Homo sapiens neuronal guanine nucleotide exchange factor (NGEF), transcript variant 1, mRNA [NM_019850]	AGGAGCCCAGGTGTTTTAAGGAATGAATTGGTCACTGCATCTTGTATCGATTATGGTTCT
A_33_P3276845	230.91922	up			AGCACGCATTGCAGCTCTGATGCAGTCTATCACTGGCAGATCGGTGTCTGAGAACACCGC
A_33_P3246883	13.283914	up	DMKN	Homo sapiens dermokine (DMKN), transcript variant 2, mRNA [NM_033317]	CAACCAGCATGCGTATCCCACTGCCTATGGTGGGAAGTACTCAGTCAAGACCCCTGCAAA
A_23_P127948	1.6407863	up	ADM	Homo sapiens adrenomedullin (ADM), mRNA [NM_001124]	GTGTAAAGTTGTTCGCCGCGTGGAATGTGAGTGTGTTTGTGTGCATGAAAGAGAAAGACT
A_33_P3308332	2.4873135	up	PLEKHB1	Homo sapiens pleckstrin homology domain containing, family B (evectins) member 1 (PLEKHB1), transcript variant 1, mRNA [NM_021200]	TAAAGCTCCCCTGTAAATGGGGGCTCCATTAGTTCTGCTGCCGAGACTAATAAAGATTTG
A_23_P100220	1.5986053	up	ESRP2	Homo sapiens epithelial splicing regulatory protein 2 (ESRP2), mRNA [NM_024939]	CTCAACTGCTGGCTCTTCTTCCCTTTGTATTTGTGTAAGGAGCACTGCACTCCCATAAAA
A_23_P82868	2.4660447	up	PLAT	Homo sapiens plasminogen activator, tissue (PLAT), transcript variant 1, mRNA [NM_000930]	TGAACAACTAGGCTTCAGCATATTTATAGCAATCCATGTTAGTTTTTACTTTCTGTTGCC
A_24_P319364	2.817674	up	F11R	Homo sapiens F11 receptor (F11R), mRNA [NM_016946]	TTTACTTCTCTAGCTTACAATGGACCTTTTGAACTGGAAAACACCTTGTCTGCATTCACT
A_23_P250347	1.5591527	up	CAMK4	Homo sapiens calcium/calmodulin-dependent protein kinase IV (CAMK4), mRNA [NM_001744]	AGGTGCAAGCCTTAGAGAAAGTTAAAGGTGCAGATATAAATGCTGAAGAGGCCCCCAAAA
A_23_P425681	6.7963214	up	CCK	Homo sapiens cholecystokinin (CCK), transcript variant 1, mRNA [NM_000729]	CTTCATCTGTGACTCCTGTTCTGAAAATGTTGTTATGCTATTAAAGTGATTTCATTCTGC
A_23_P380881	1.7063488	up	ANKRD13B	Homo sapiens ankyrin repeat domain 13B (ANKRD13B), mRNA [NM_152345]	TCGGAGAGTGGGGAGCATATTGGGCTGGGGTAAGCACTAGACCCAAGTAGACTGGACACA
A_24_P264943	1.6974565	up	COMP	Homo sapiens cartilage oligomeric matrix protein (COMP), mRNA [NM_000095]	TTACCGCTGCAATGACACCATCCCAGAGGACTATGAGACCCATCAGCTGCGGCAAGCCTA
A_23_P33326	1.7521777	up	ADRA1B	Homo sapiens adrenoceptor alpha 1B (ADRA1B), mRNA [NM_000679]	CTCCTTGTACTTCACTGAAGGATGGCACTTTGGTGGGGTTGGAAACAAAGTCGACATTAA
A_23_P12357	1.8583272	up	CRB1	Homo sapiens crumbs homolog 1 (Drosophila) (CRB1), transcript variant 1, mRNA [NM_201253]	TCAACAGTCTGTGGGAATGAGAAGACAAATCTCACTTGCTACAATGGAGGCAACTGCACA
A_23_P80008	2.8779995	up	MYLK2	Homo sapiens myosin light chain kinase 2 (MYLK2), mRNA [NM_033118]	CAGGAGAATTAGGAAGGCCATGGGGCAGCCTCCAGTCTGCTCTCAGCTTGTGCCTTGTAA
A_23_P203391	1.6558597	up	ASRGL1	Homo sapiens asparaginase like 1 (ASRGL1), transcript variant 1, mRNA [NM_001083926]	TTCTGAAGCAATGAGAGAAATGCCCGTATTAGGAGGATTACTTGAGCCCTGGAGGTCAAA
A_24_P64329	1.8987967	up	STK32C	Homo sapiens serine/threonine kinase 32C (STK32C), mRNA [NM_173575]	ATCTTCAAGACTGCCTCGATGCCATCCAGCAAGACTTCGTGATTTTTAACAGAGAAAAGC
A_33_P3216442	1.5966583	up	COL11A2	Homo sapiens collagen, type XI, alpha 2 (COL11A2), transcript variant 1, mRNA [NM_080680]	AGAAACGGAATAGTGTGGGGTGTGTGCAGGGCTGCATCCCGCAGATGGCTGGAATATTAA
A_24_P860797	2.4408195	up	PAIP2B	Homo sapiens poly(A) binding protein interacting protein 2B (PAIP2B), mRNA [NM_020459]	AGTTAAATGGACTGTCAGTCAGTGAAGGTCATGATTCTGAAGATATTTTGAGCAAAAGTA
A_23_P142631	1.901771	up	FKBP1B	Homo sapiens FK506 binding protein 1B, 12.6 kDa (FKBP1B), transcript variant 2, mRNA [NM_054033]	GGTTGTGCATTTTGTGTGATGCATGTAGTAGCCTTTCCTGATGACAGAACACAGATCTCT
A_21_P0005201	4.931908	up		PREDICTED: Homo sapiens uncharacterized LOC101928211 (LOC101928211), misc_RNA [XR_242337]	TAAGCACATAATTATTCCACTACTTGCCATGTCTTAAATAAAACTGTGTTCCAGAGTCTG
A_33_P3251801	3.228893	up	KLRG2	Homo sapiens killer cell lectin-like receptor subfamily G, member 2 (KLRG2), mRNA [NM_198508]	GGAGATTTTCTATGGCCTCAGGCCTGAGTGCCAATATTAGTCTCCAGCTTCTGTGGATGA
A_23_P142389	1.9431252	up	LSR	Homo sapiens lipolysis stimulated lipoprotein receptor (LSR), transcript variant 2, mRNA [NM_205834]	ACCCGGGACCCTCGGGACAACGGCTCCAGGTCCGGGGACCTCCCCTATGATGGGCGGCTA
A_23_P144827	5.903081	up	FBXL7	Homo sapiens F-box and leucine-rich repeat protein 7 (FBXL7), transcript variant 1, mRNA [NM_012304]	ACAAAGCTGACTGTTCACACTGATTGCCCAGCACATACCGTCTTGCCAGTTTCTTCTTTT
A_33_P3312222	90.9202	up			AGGATGACAACCCTGCTGTCTTCCATGTCTGAGGAGCAGCTGTCCCGCTACGAAGTGTGT
A_33_P3368695	1.9036723	up	HES7	Homo sapiens hes family bHLH transcription factor 7 (HES7), transcript variant 1, mRNA [NM_001165967]	CGGATAAAAAGGAAAAATTGAAATAAAATCGACTCTGGTGGGATTCGAACCCACAACCTT
A_33_P3360611	1.6256772	up	MPP2	Homo sapiens membrane protein, palmitoylated 2 (MAGUK p55 subfamily member 2) (MPP2), transcript variant 9, mRNA [NM_001278381]	TTGAGTTTTCTCACTGATTGGTTTTCTTTCTTTTTCCTTGGATTAAATGTGAAAGCAAAG
A_21_P0011362	2.0067222	up	LOC101059918	Homo sapiens golgin subfamily A member 8R-like (LOC101059918), mRNA [NM_001282484]	GAAAAACAGACCTAGAGTTCCAGCAGGAGTGAACAGGAACAGGAAAACAAATGGCAGTAT
A_33_P3251073	1.6071733	up	TMEM52	Homo sapiens transmembrane protein 52 (TMEM52), mRNA [NM_178545]	CAGGGCCACCTGTGACGTCTGCATCTTCTTGGAGAGAGAATAAAGTTTGTATTTAAGTGG
A_21_P0000069	3.4682453	up	VEPH1	Homo sapiens ventricular zone expressed PH domain-containing 1 (VEPH1), transcript variant 4, mRNA [NM_001167915]	GGGGTATGAAAAACCTGTCTTCATTTGCTTCCAAAAGCAAGAAATGTCTTTTGTTAGATA
A_21_P0005953	1.7951611	up	XLOC_006934	BROAD Institute lincRNA (XLOC_006934), lincRNA [TCONS_00015370]	CCCCAAACAATACCACAAGTTACTCCAGGGCATATTCTGTTTATAATTTTGAAATGTCAG
A_23_P162322	1.717515	up	WNT10B	Homo sapiens wingless-type MMTV integration site family, member 10B (WNT10B), mRNA [NM_003394]	TTTGGAGCCATAAGATCTGTATCTAGAAAGAGATCACCCACTCCTATGTACTATCCCCAA
A_33_P3213029	2.1411967	up	RNF43	Homo sapiens ring finger protein 43 (RNF43), mRNA [NM_017763]	GGGTATTTATATCTGAACCAGACAGACGCTTGAATCAGGCACTATGTTAAGAAATATATT
A_32_P41065	1.5878562	up	TMCC1	Homo sapiens transmembrane and coiled-coil domain family 1 (TMCC1), transcript variant 1, mRNA [NM_001017395]	GTATGTCGTGTATGCTAGGTGATATCCTCAGTAGGGATTGACTACTAGACTGTGTGTTTT
[truncated: 404 more rows]

## Sheet: FC > 1.5 D shRNA Ki-67 vs CT
ProbeName	FC ([shRNA Ki-67] vs [shRNA CTRL])	Regulation ([shRNA Ki-67] vs [shRNA CTRL])	GeneSymbol	Description	Sequence
[truncated: 320 more rows]

[truncated: 2 more sheets: GO UP shRNA Ki-67 vs CTRL, GO DOWN H shRNA Ki-67 vs CTRL]
