# Supplementary material for: The cell proliferation antigen Ki-67 organises heterochromatin
Source: eLife journal article supplement (doi:10.7554/elife.13722), 2016-03-07

# Figure 2 – figure supplement 1

## Embryo Heart - E18.5

Fzr1(+/ $\Delta$ ); Sox2-Cre

Fzr1(-/ $\Delta$ ); Sox2-Cre

Ki-67

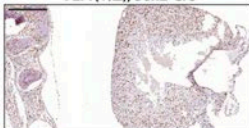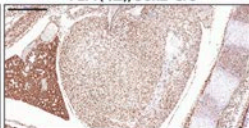

BrdU

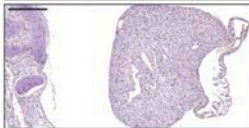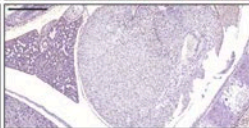

## Embryo Lung - E18.5

Fzr1(+/ $\Delta$ ); Sox2-Cre

Fzr1(-/ $\Delta$ ); Sox2-Cre

Ki-67

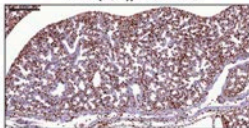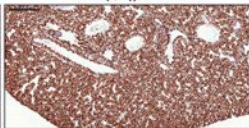

BrdU

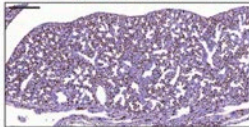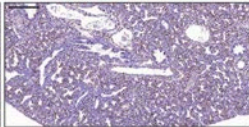

Supplement: supp [file elife_poa_e13722_Figure_2_figure_supplement_1.pdf › elife_poa_e13722_Figure_2_figure_supplement_1.pdf]
