# Supplementary material for: The cell proliferation antigen Ki-67 organises heterochromatin
Source: eLife journal article supplement (doi:10.7554/elife.13722), 2016-03-07

**Figure 4 – figure supplement 1**

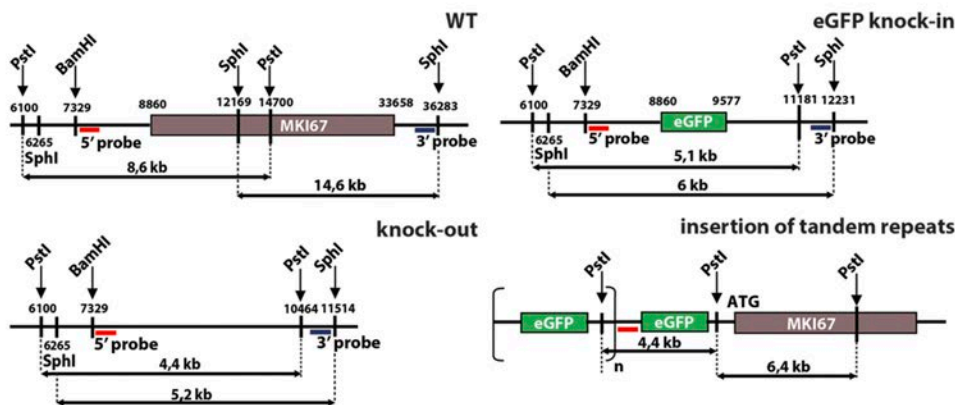

**PstI digestion** — **5' probe**

| WT |    | TALEN |    |    |    |    |    |
|----|----|-------|----|----|----|----|----|
| M  | WT | W4    | 60 | 63 | 65 | 82 | 99 |

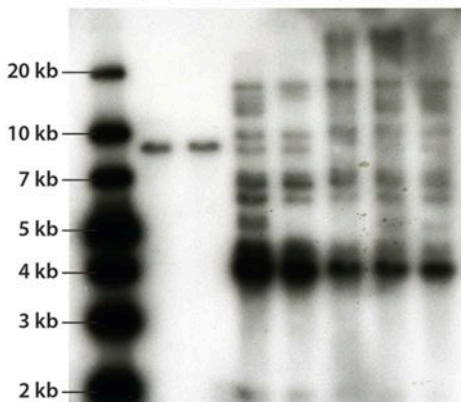

**SphI digestion** — **3' probe**

| WT |    | TALEN |    |    |    |    |    |
|----|----|-------|----|----|----|----|----|
| M  | WT | W4    | 60 | 63 | 65 | 82 | 99 |

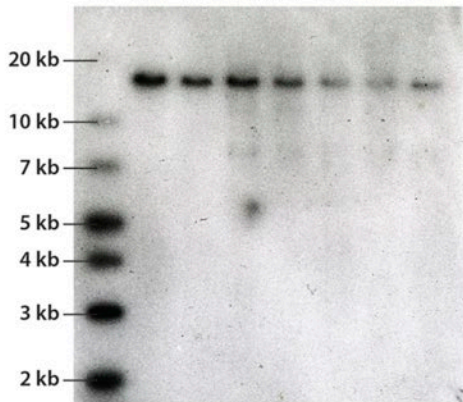

Supplement: supp [file elife_poa_e13722_Figure_4_figure_supplement_1.pdf › elife_poa_e13722_Figure_4_figure_supplement_1.pdf]
