# Supplementary figures and images for: The cell proliferation antigen Ki-67 organises heterochromatin
Source: eLife journal article supplement (doi:10.7554/elife.13722), 2016-03-07

Figure 10 – figure supplement 1

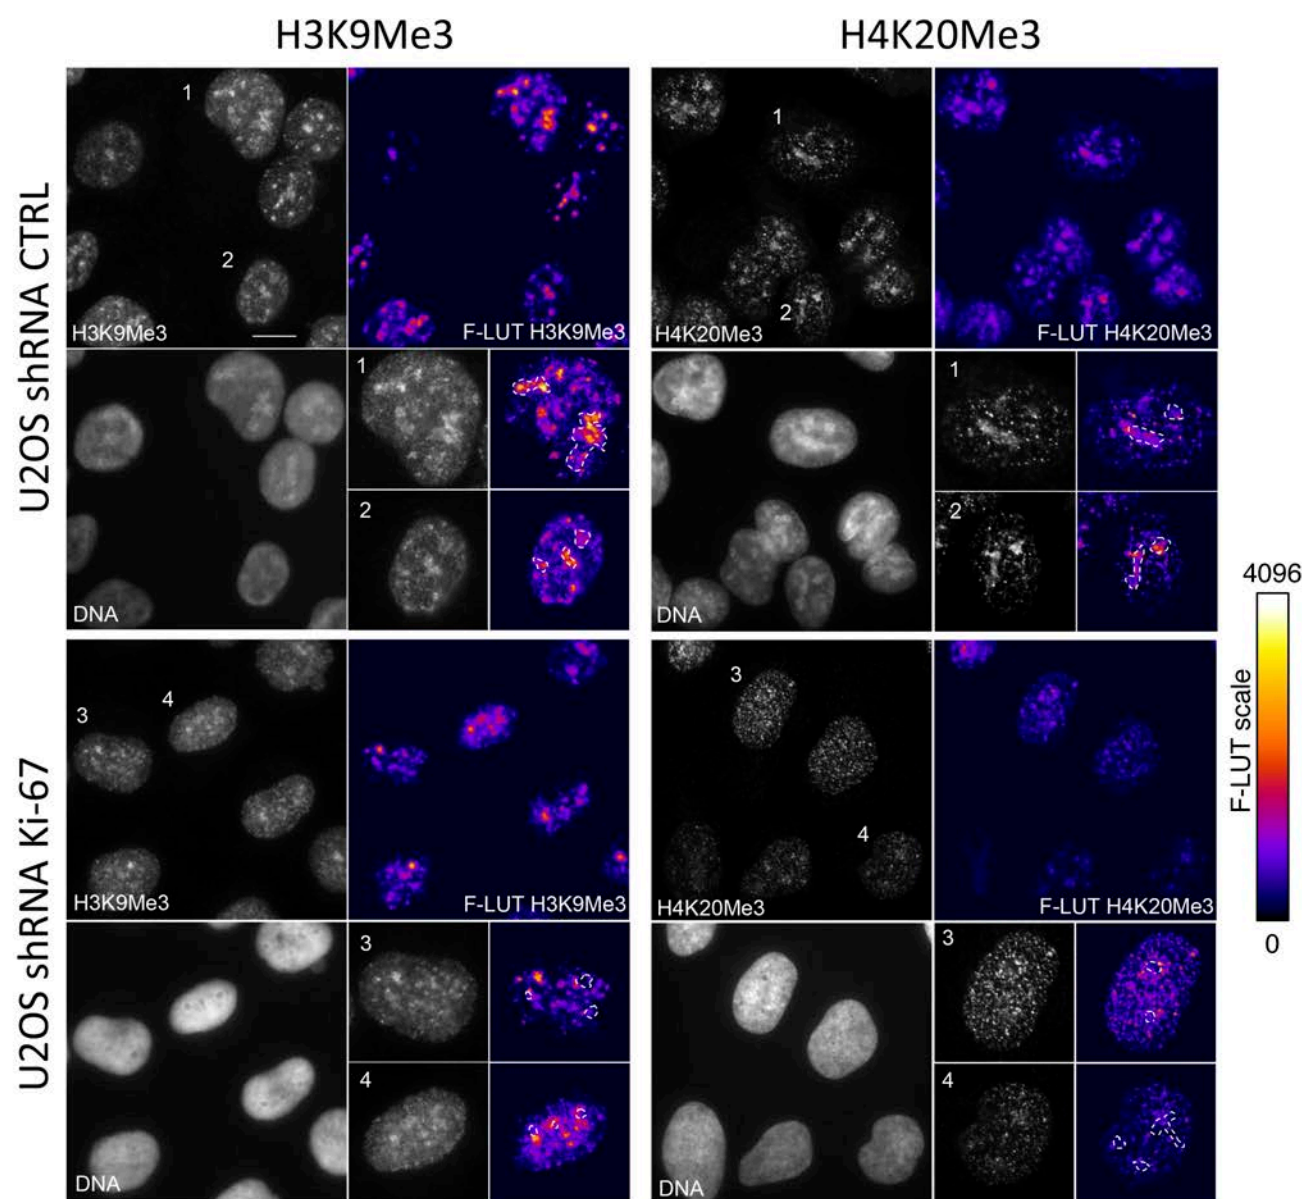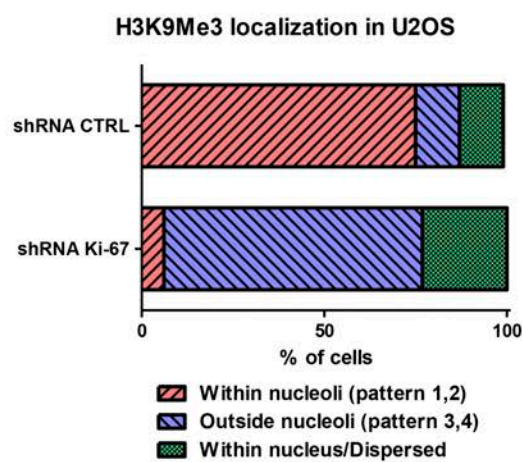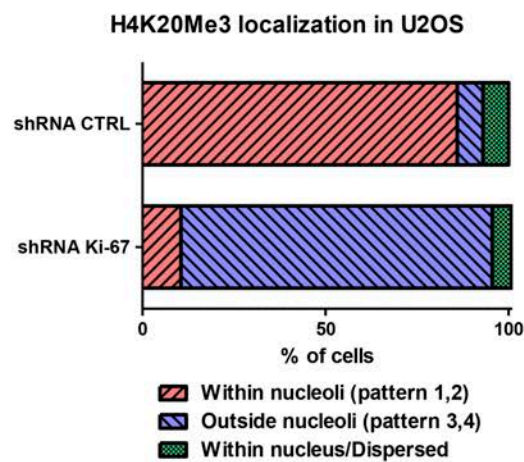

Supplement: supp [file elife_poa_e13722_Figure_10_figure_supplement_1.pdf › elife_poa_e13722_Figure_10_figure_supplement_1.pdf]

Figure 10 – figure supplement 2

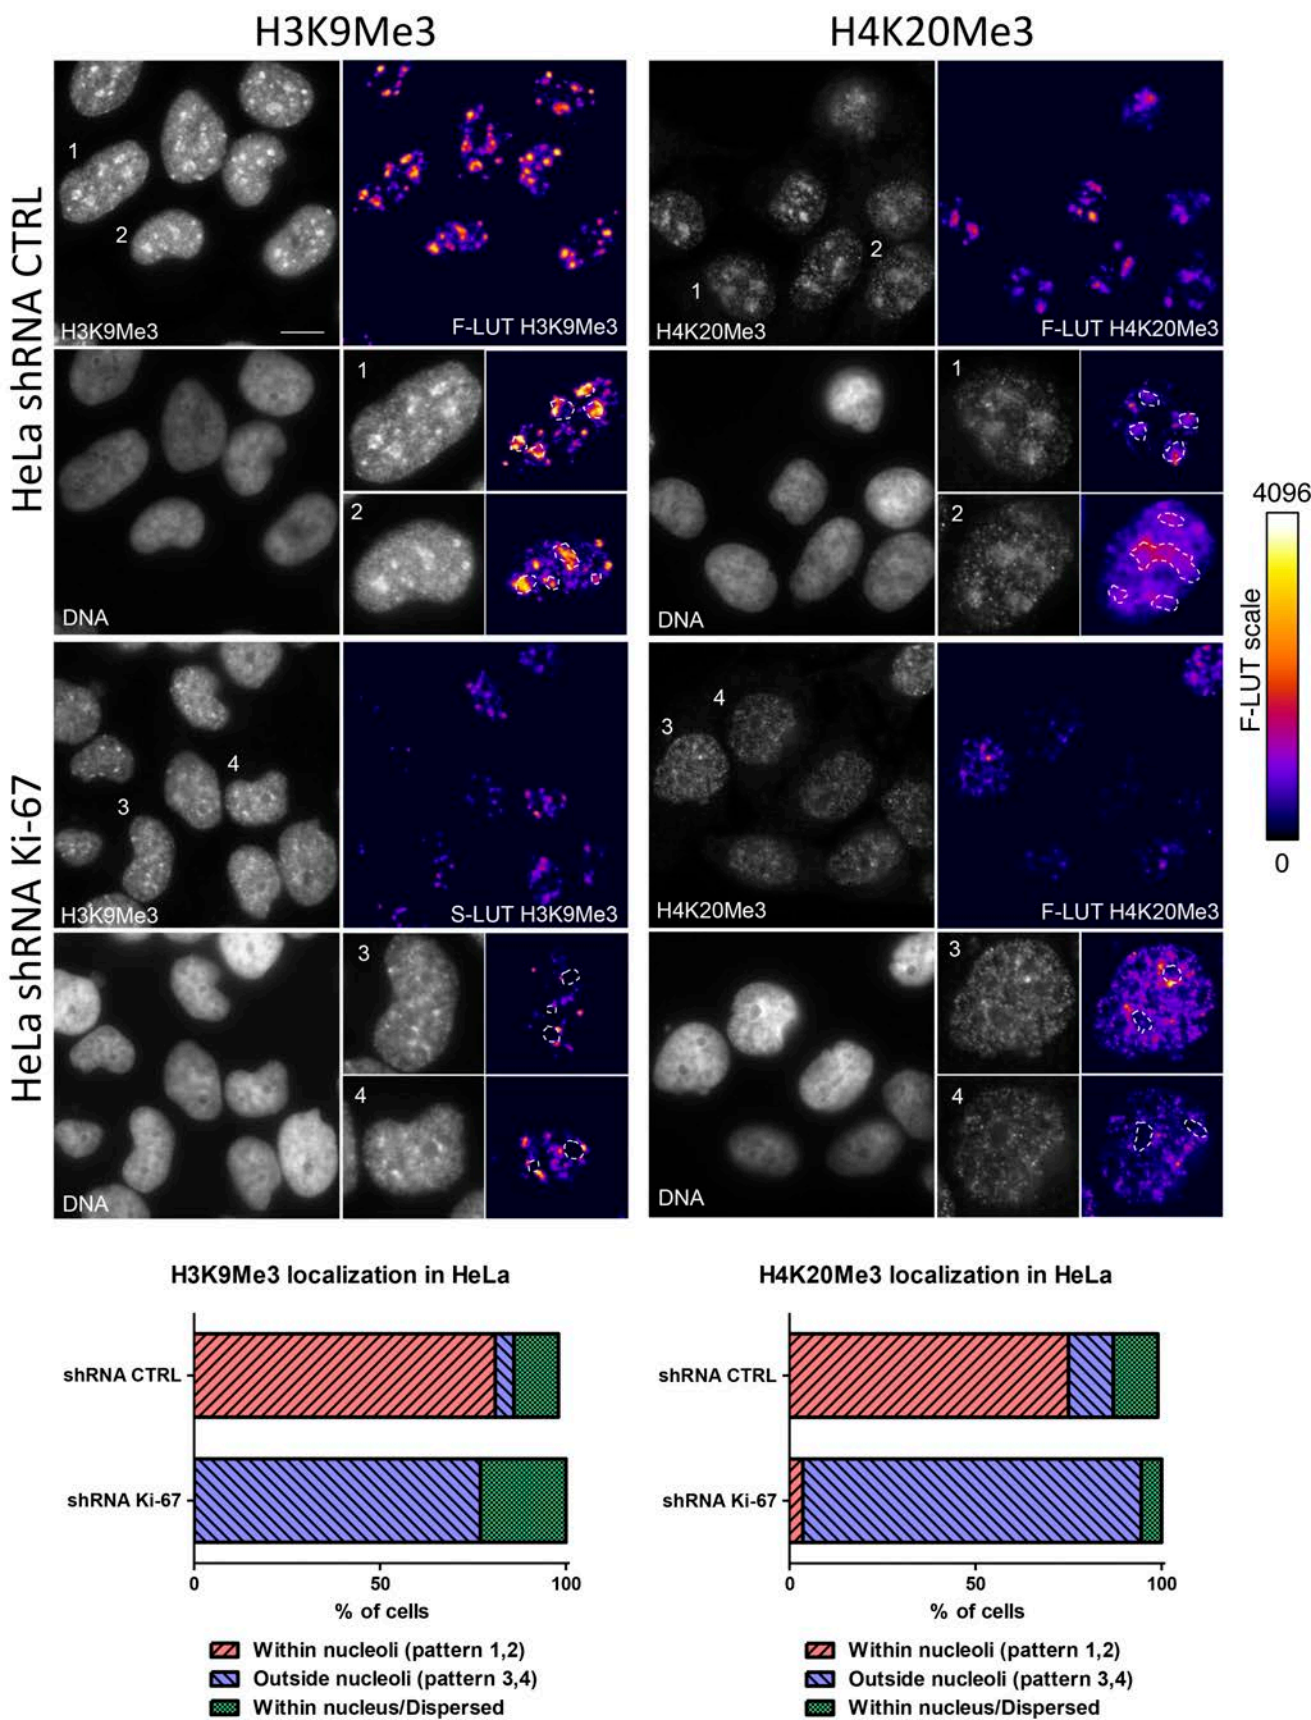

Supplement: supp [file elife_poa_e13722_Figure_10_figure_supplement_2.pdf › elife_poa_e13722_Figure_10_figure_supplement_2.pdf]

**Figure 10 – figure supplement 3**

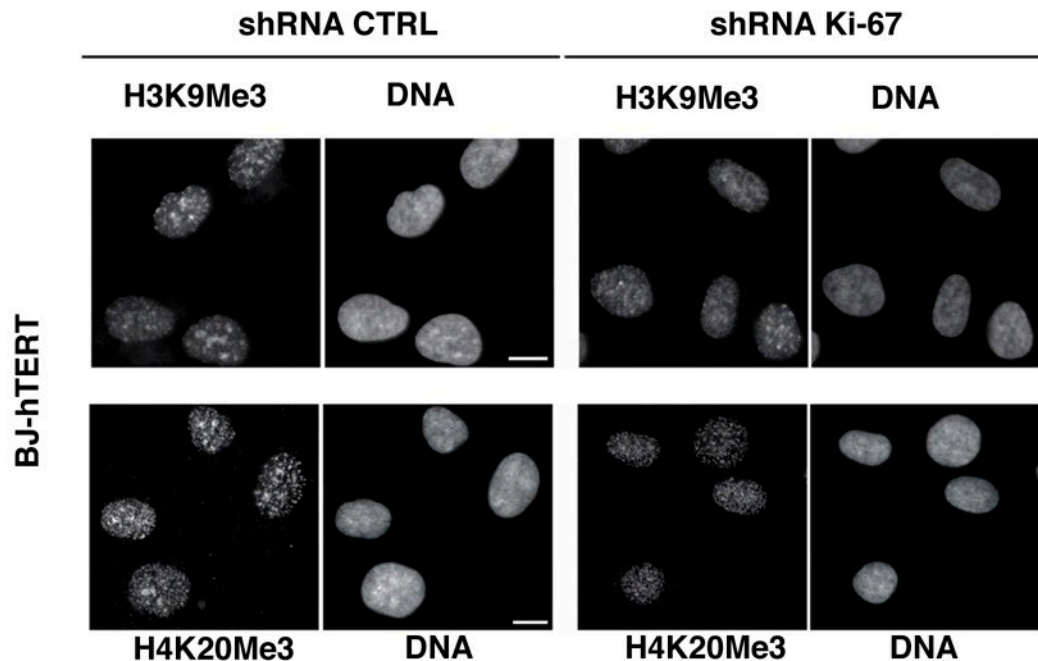

Supplement: supp [file elife_poa_e13722_Figure_10_figure_supplement_3.pdf › elife_poa_e13722_Figure_10_figure_supplement_3.pdf]

**Figure 10 – figure supplement 4**

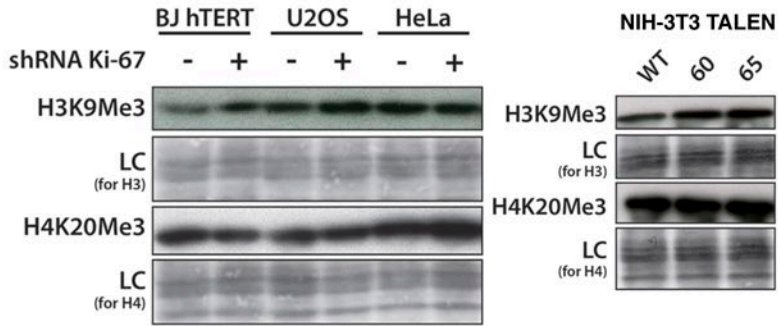

Supplement: supp [file elife_poa_e13722_Figure_10_figure_supplement_4.pdf › elife_poa_e13722_Figure_10_figure_supplement_4.pdf]

**Figure 10 – figure supplement 5**

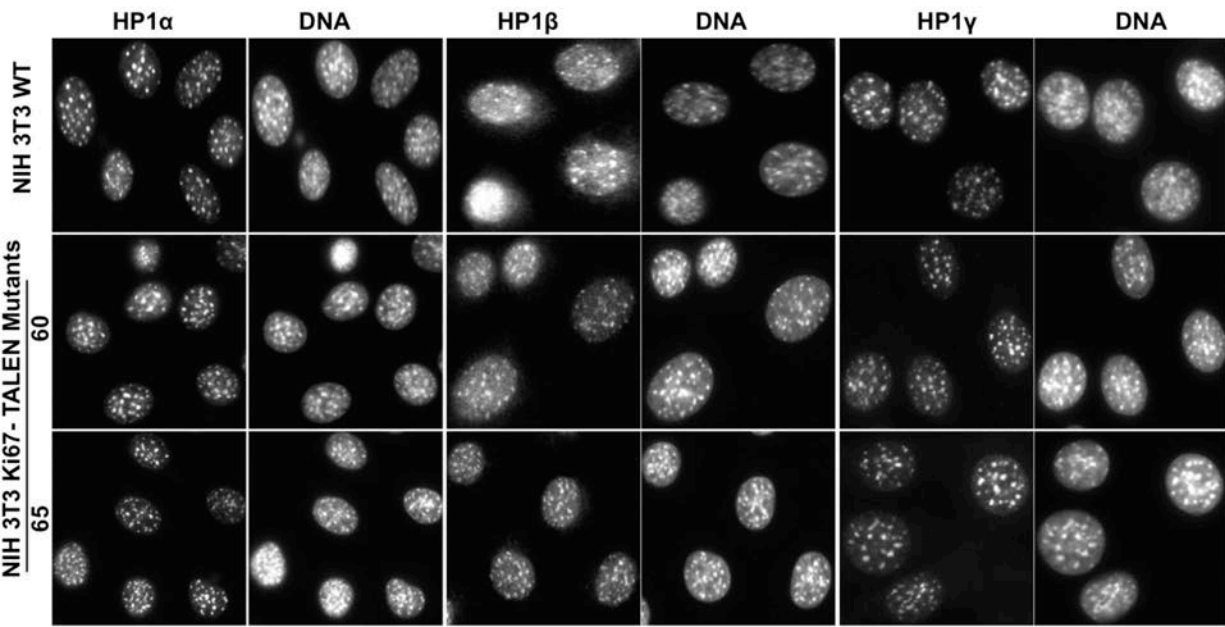

Supplement: supp [file elife_poa_e13722_Figure_10_figure_supplement_5.pdf › elife_poa_e13722_Figure_10_figure_supplement_5.pdf]

# Figure 11 – figure supplement 1

## A

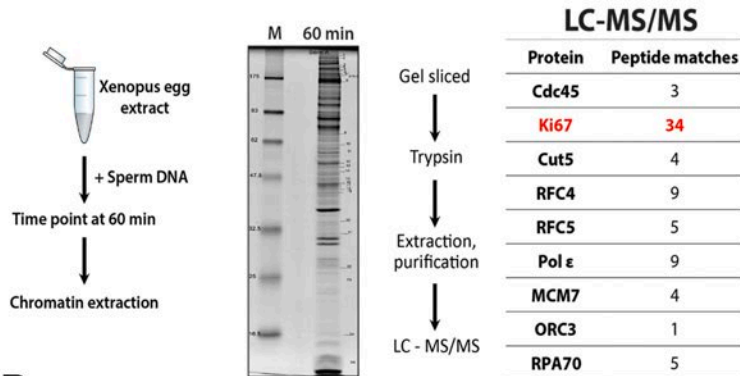

## B

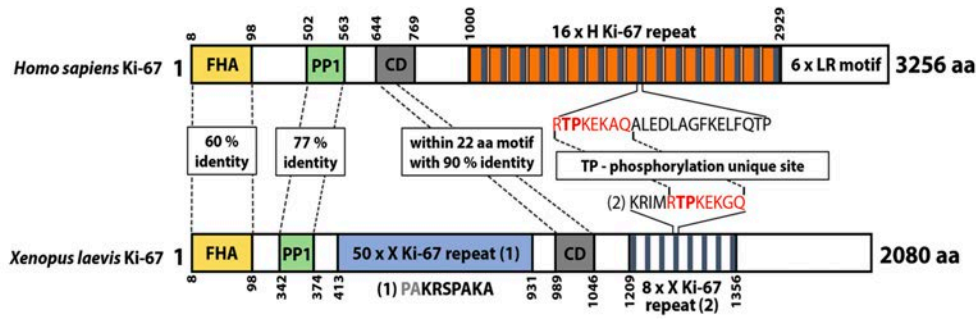

Supplement: supp [file elife_poa_e13722_Figure_11_figure_supplement_1.pdf › elife_poa_e13722_Figure_11_figure_supplement_1.pdf]

Figure 11 – figure supplement 2

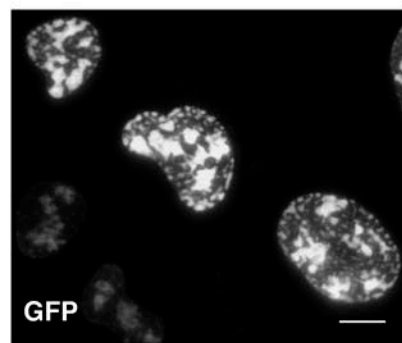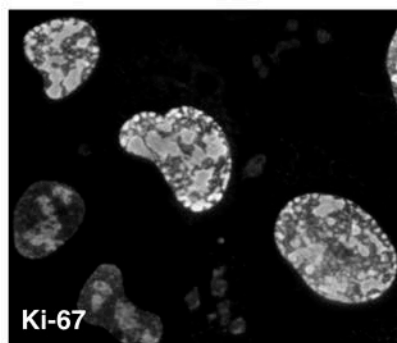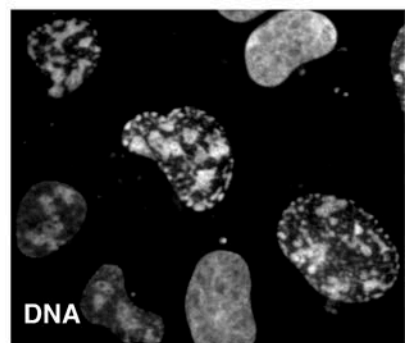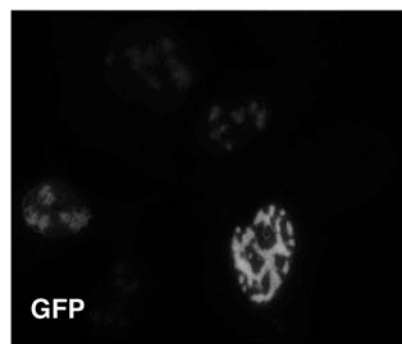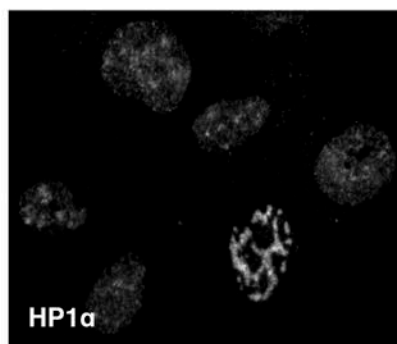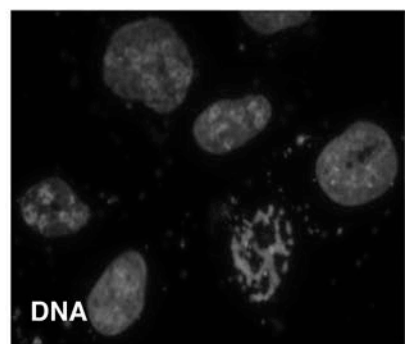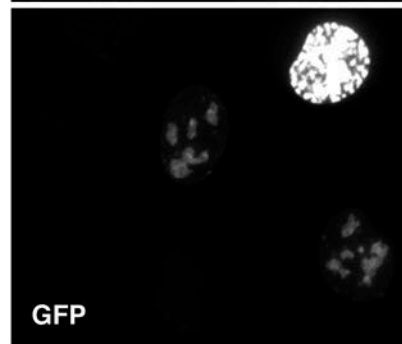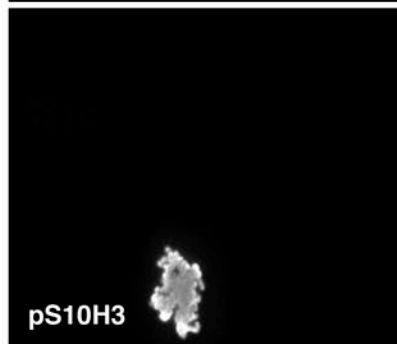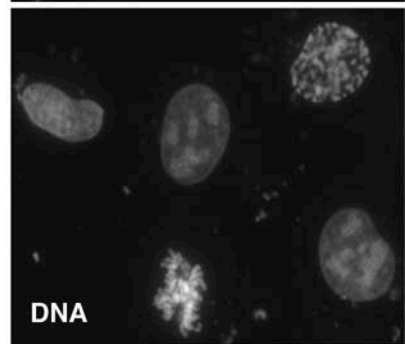

Supplement: supp [file elife_poa_e13722_Figure_11_figure_supplement_2.pdf › elife_poa_e13722_Figure_11_figure_supplement_2.pdf]

**Figure 3 – figure supplement 1**

**A**

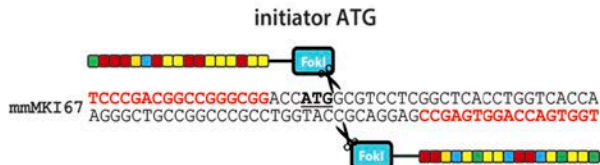

**B**

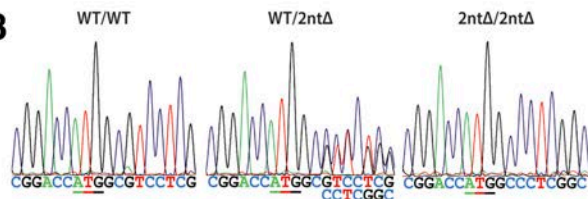

**C**

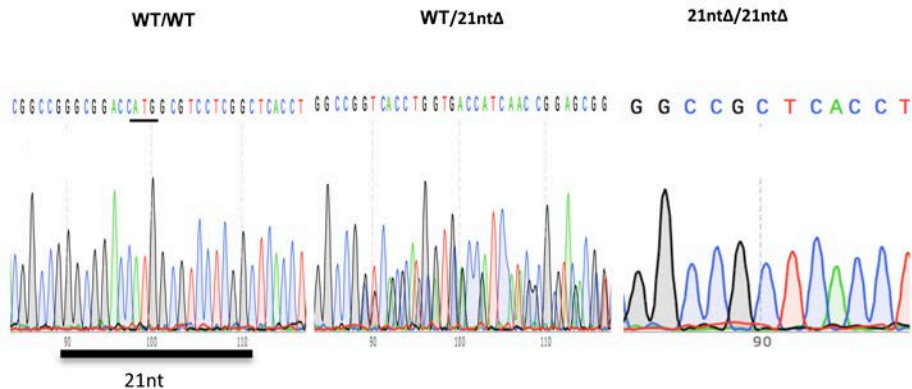

**D**

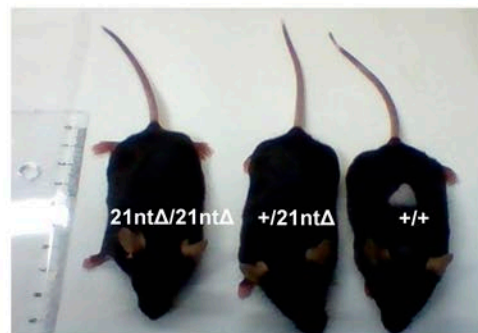

Supplement: supp [file elife_poa_e13722_Figure_3_figure_supplement_1.pdf › elife_poa_e13722_Figure_3_figure_supplement_1.pdf]

**Figure 3— figure supplement 10**

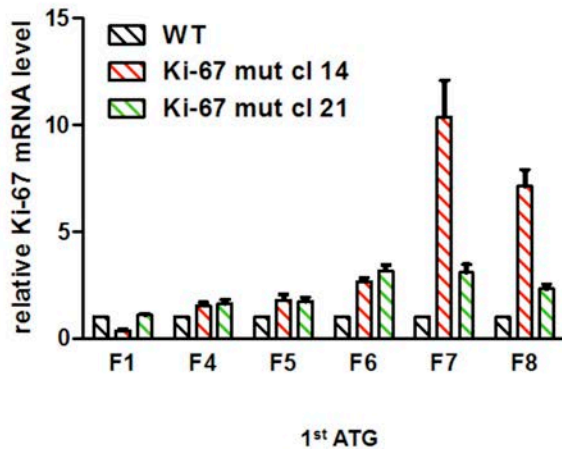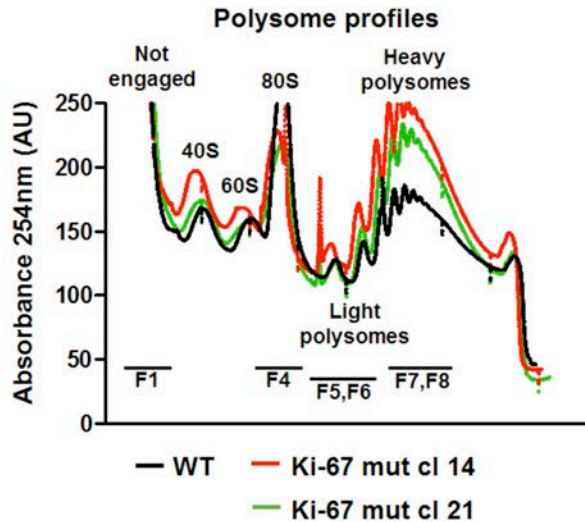

Supplement: supp [file elife_poa_e13722_Figure_3_figure_supplement_10.pdf › elife_poa_e13722_Figure_3_figure_supplement_10.pdf]

Figure 3— figure supplement 11

**A**

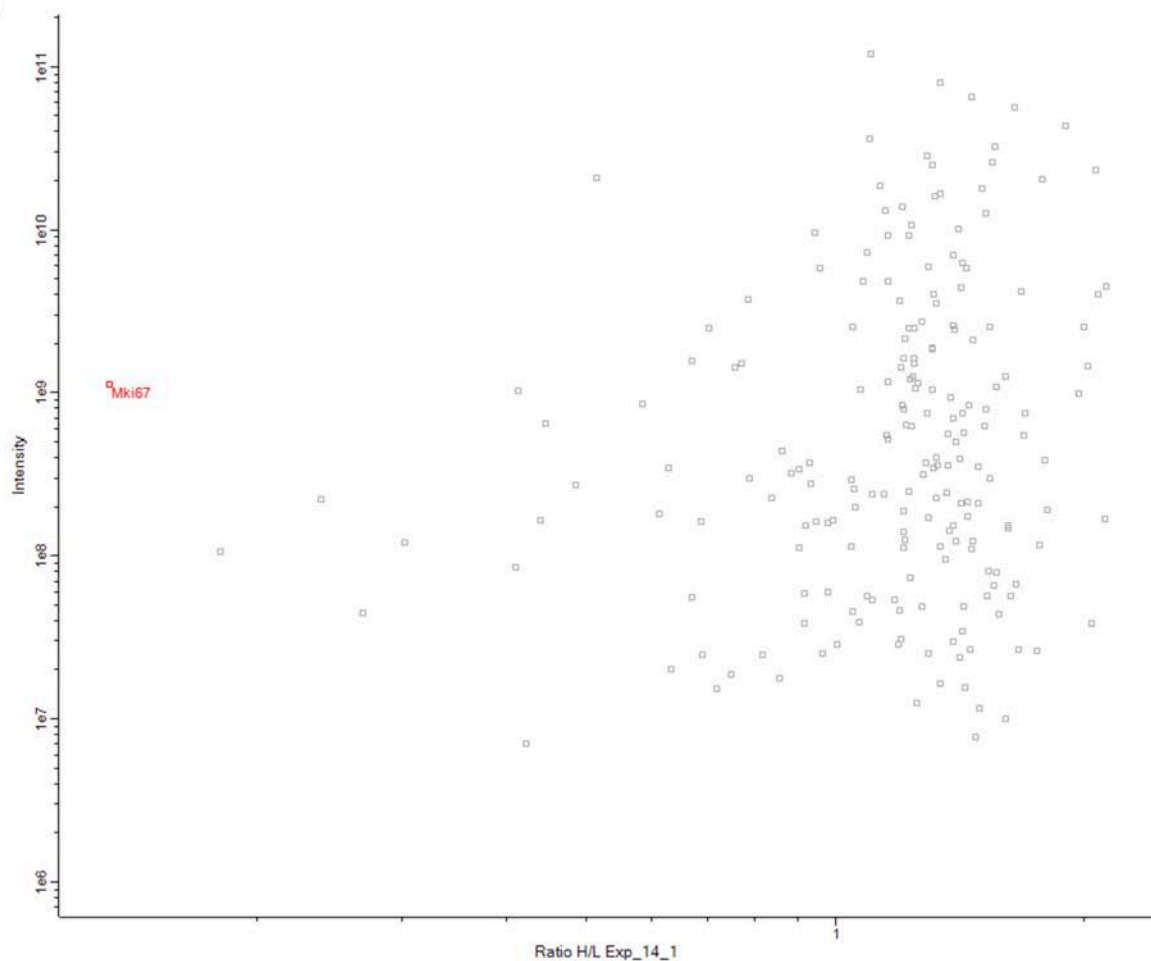

**B** APGTPAPVQEENDSTAFMETPK

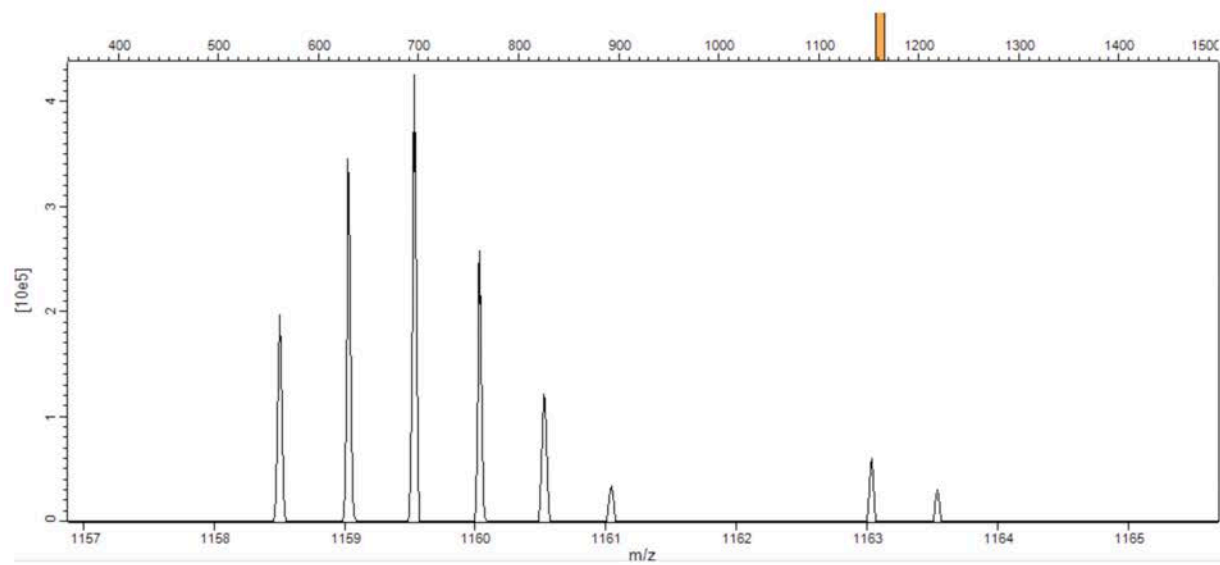

Light

Heavy

Supplement: supp [file elife_poa_e13722_Figure_3_figure_supplement_11.pdf › elife_poa_e13722_Figure_3_figure_supplement_11.pdf]

**Figure 3 – figure supplement 2**

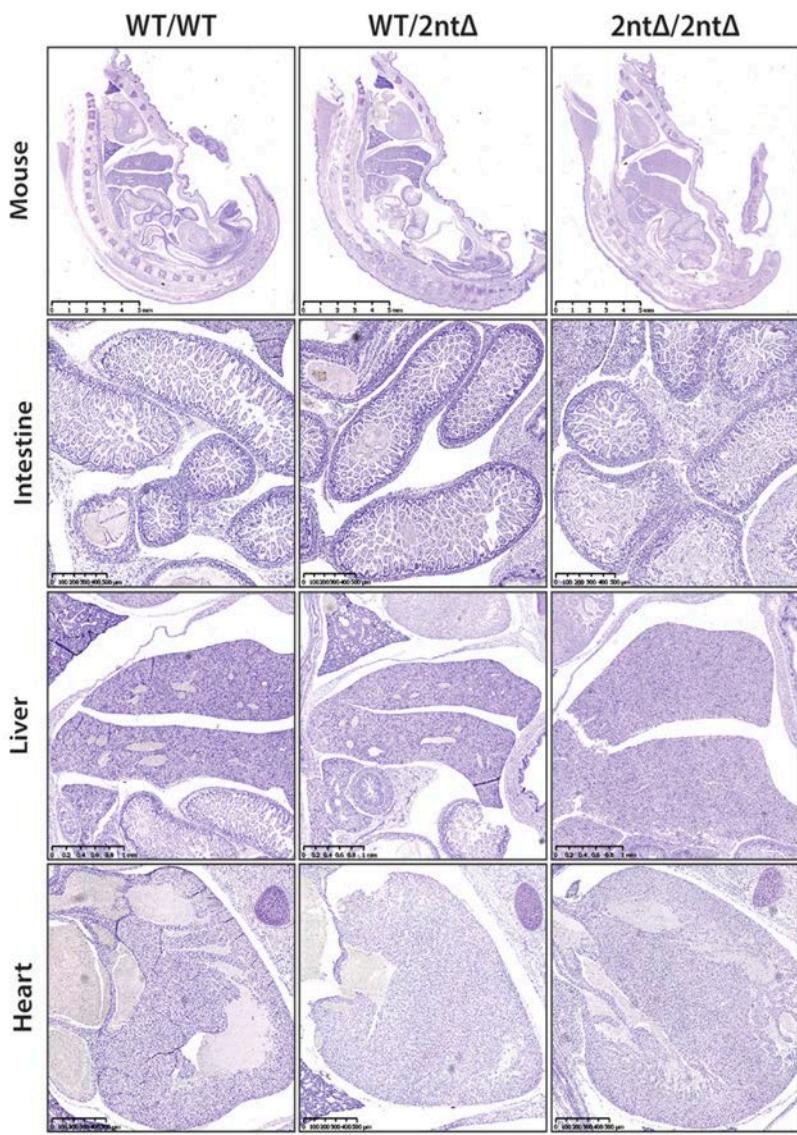

Supplement: supp [file elife_poa_e13722_Figure_3_figure_supplement_2.pdf › elife_poa_e13722_Figure_3_figure_supplement_2.pdf]

Figure 3 – figure supplement 3

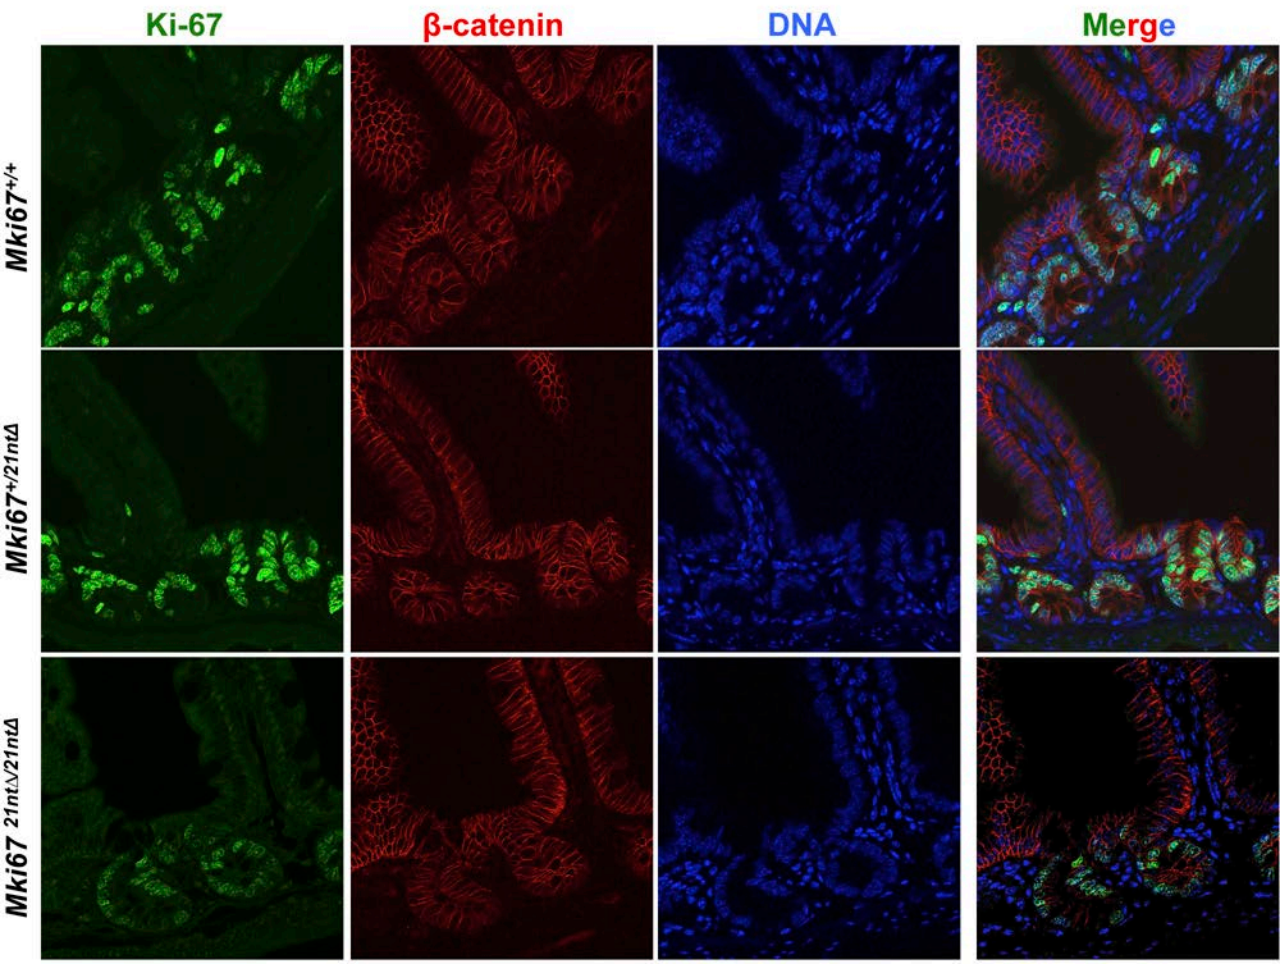

Supplement: supp [file elife_poa_e13722_Figure_3_figure_supplement_3.pdf › elife_poa_e13722_Figure_3_figure_supplement_3.pdf]

# Figure 3 – figure supplement 4

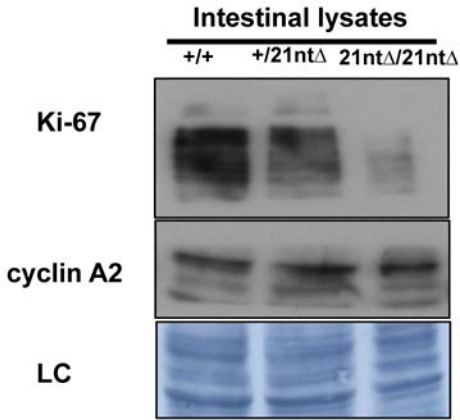

Supplement: supp [file elife_poa_e13722_Figure_3_figure_supplement_4.pdf › elife_poa_e13722_Figure_3_figure_supplement_4.pdf]

Figure 3 – figure supplement 5

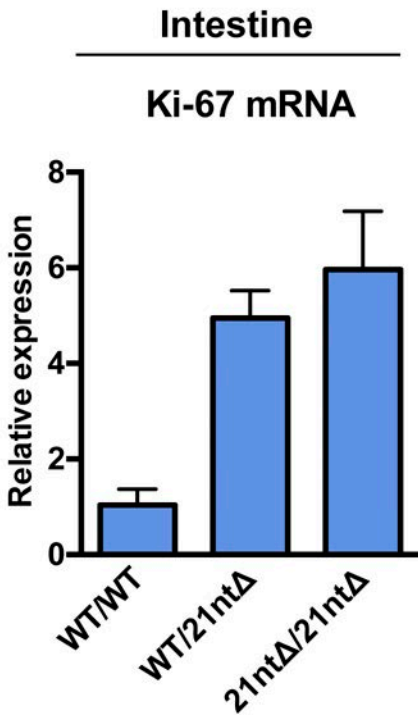

Supplement: supp [file elife_poa_e13722_Figure_3_figure_supplement_5.pdf › elife_poa_e13722_Figure_3_figure_supplement_5.pdf]

**Figure 3 – figure supplement 6**

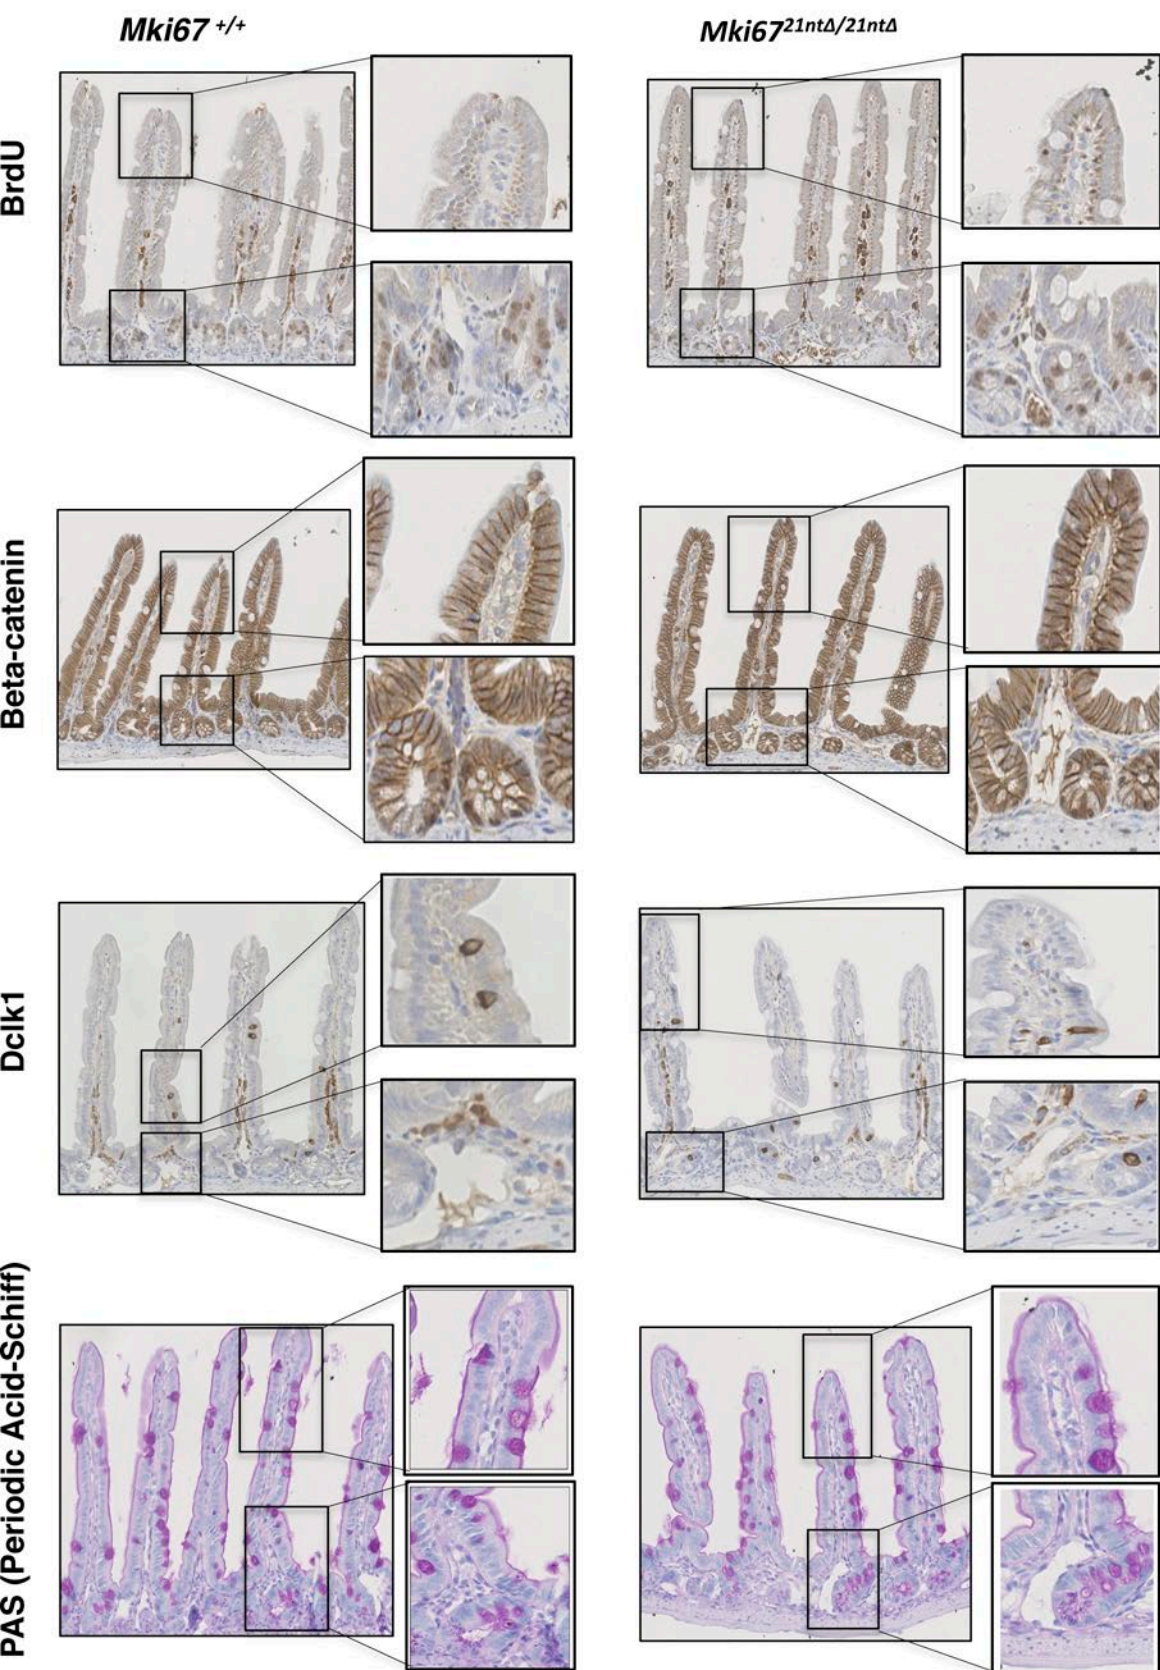

Supplement: supp [file elife_poa_e13722_Figure_3_figure_supplement_6.pdf › elife_poa_e13722_Figure_3_figure_supplement_6.pdf]

Figure 3 – figure supplement 7

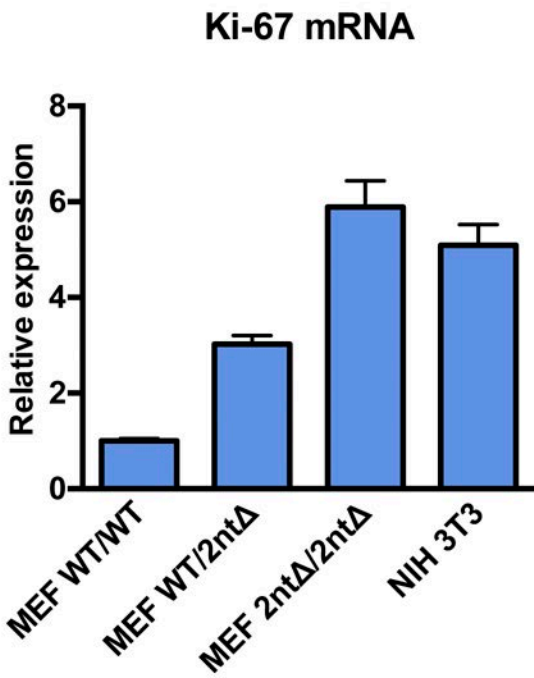

Supplement: supp [file elife_poa_e13722_Figure_3_figure_supplement_7.pdf › elife_poa_e13722_Figure_3_figure_supplement_7.pdf]

**Figure 3 – figure supplement 8**

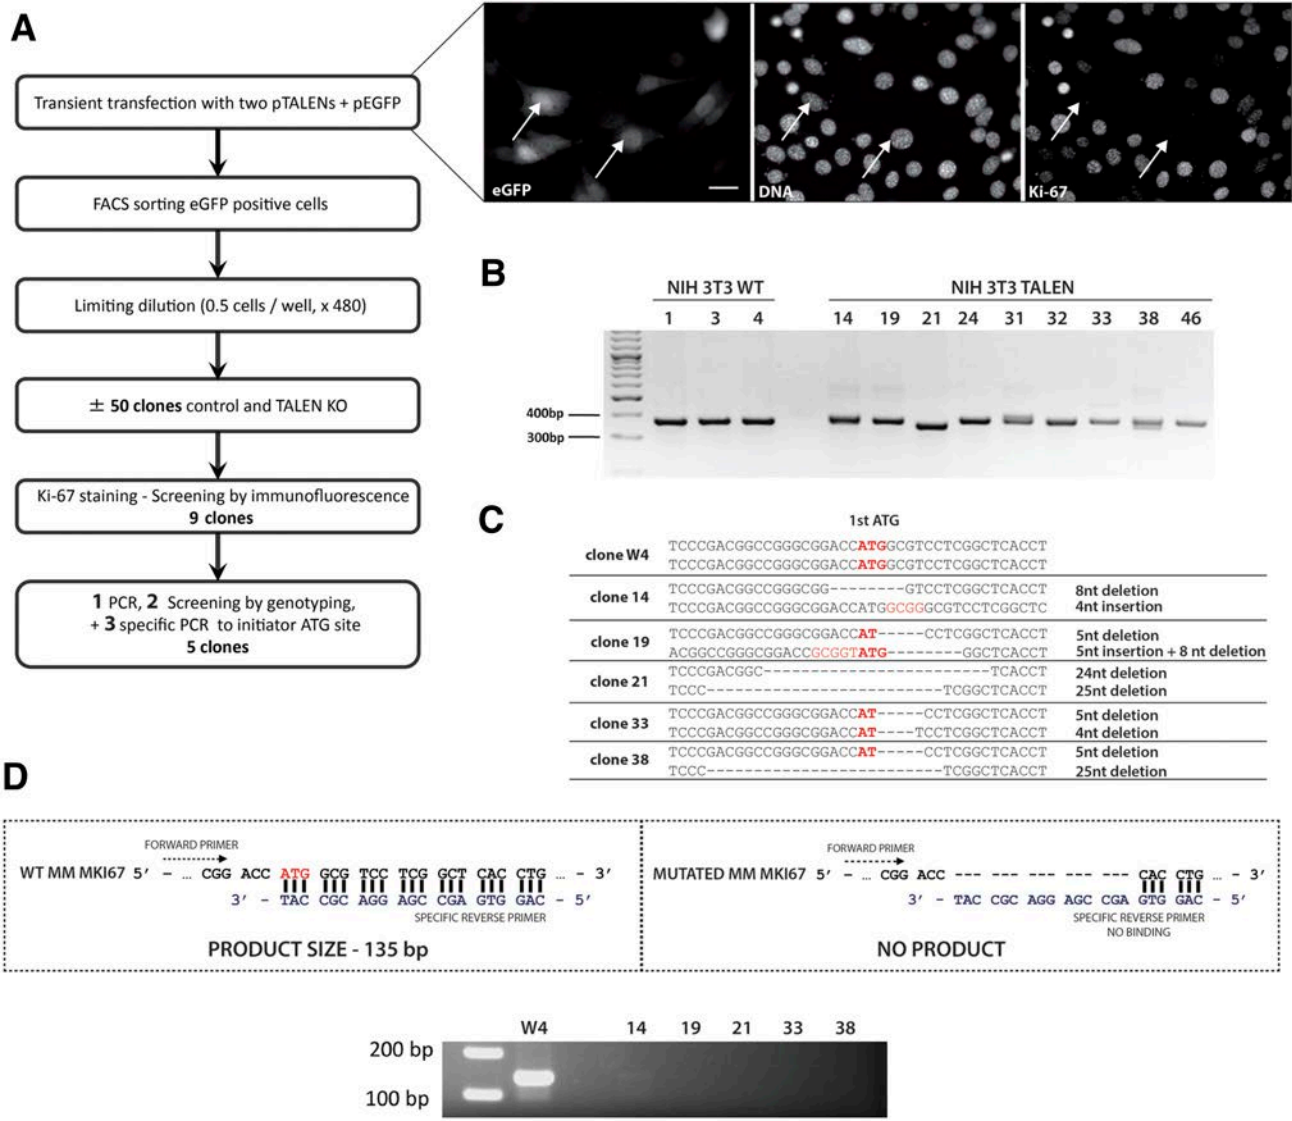

Supplement: supp [file elife_poa_e13722_Figure_3_figure_supplement_8.pdf › elife_poa_e13722_Figure_3_figure_supplement_8.pdf]

**Figure 3 – figure supplement 9**

**A**

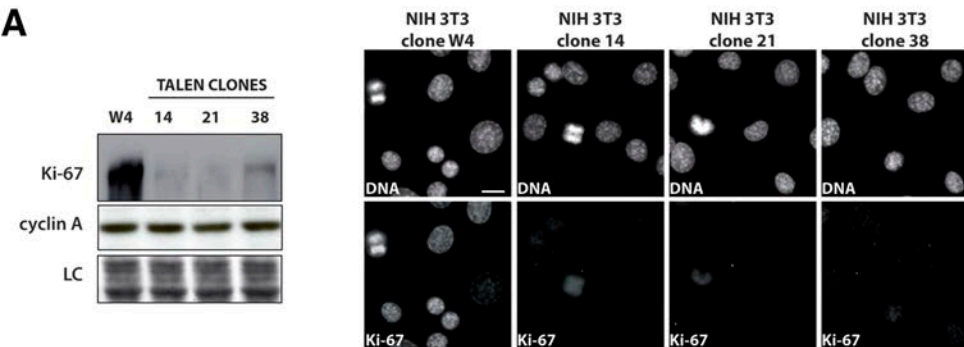

**B**

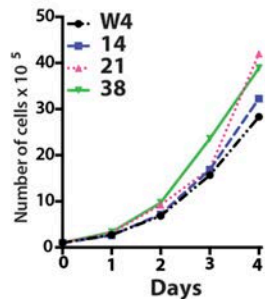

**C**

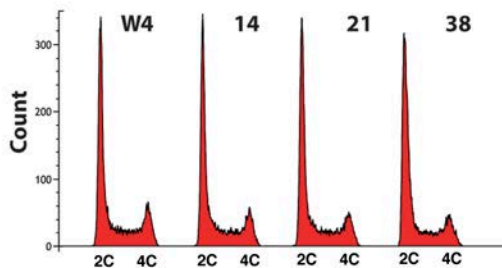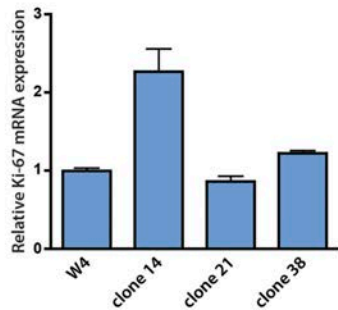

Supplement: supp [file elife_poa_e13722_Figure_3_figure_supplement_9.pdf › elife_poa_e13722_Figure_3_figure_supplement_9.pdf]

# Figure 5 – figure supplement 1

**A**

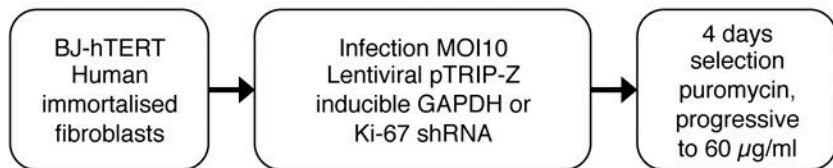

**B**

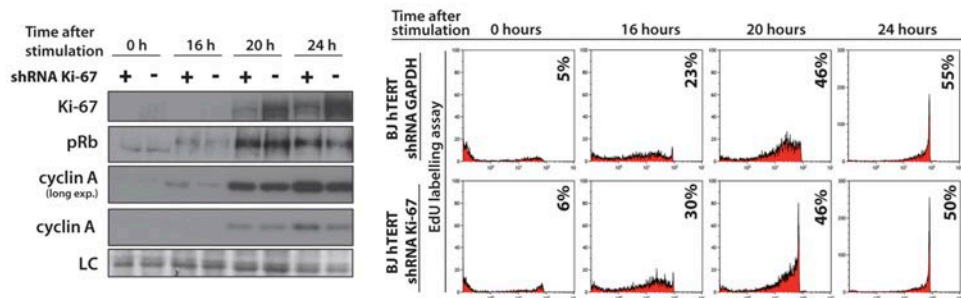

**C**

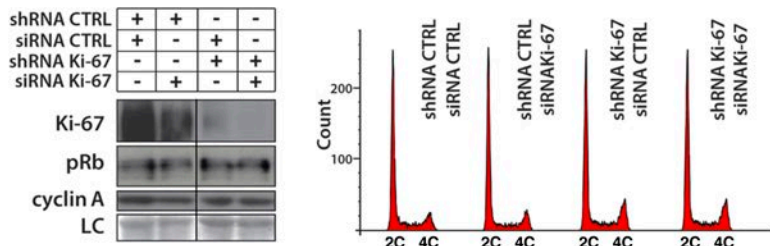

Supplement: supp [file elife_poa_e13722_Figure_5_figure_supplement_1.pdf › elife_poa_e13722_Figure_5_figure_supplement_1.pdf]

**Figure 5 – figure supplement 2**

**A**

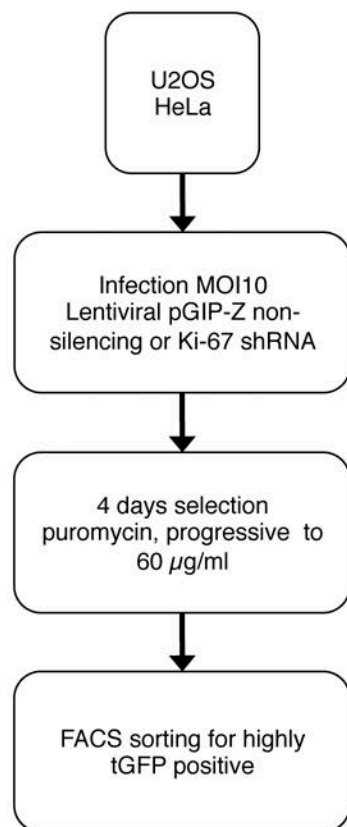

**B**

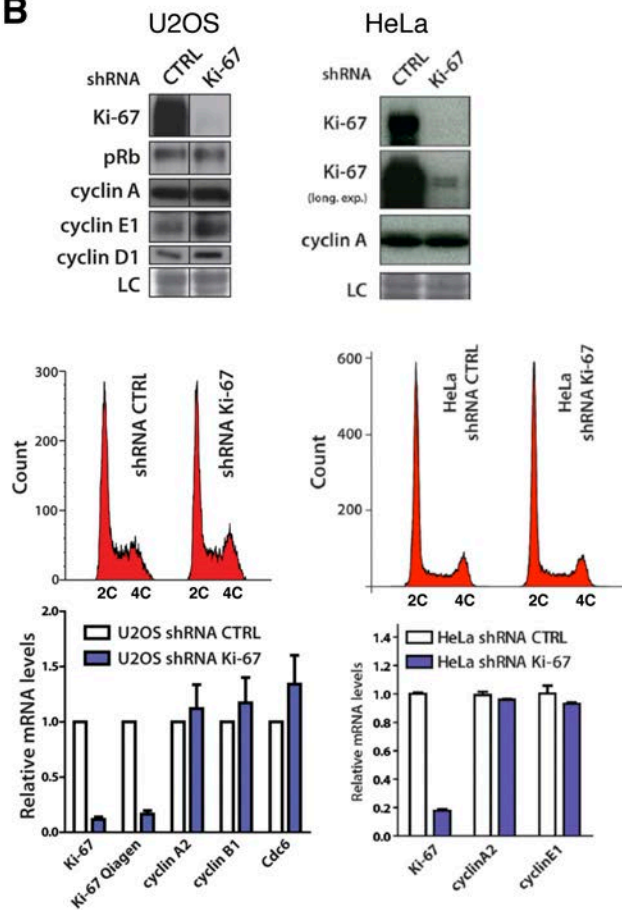

**C**

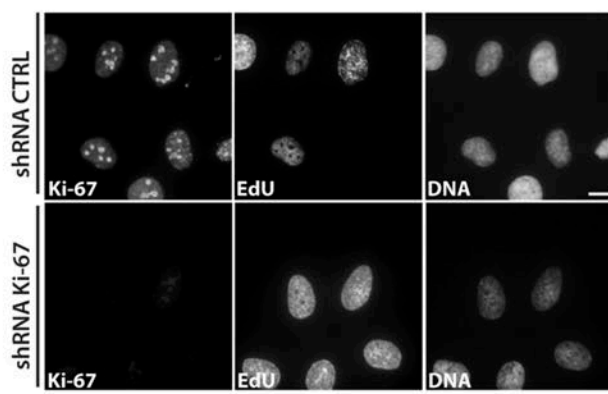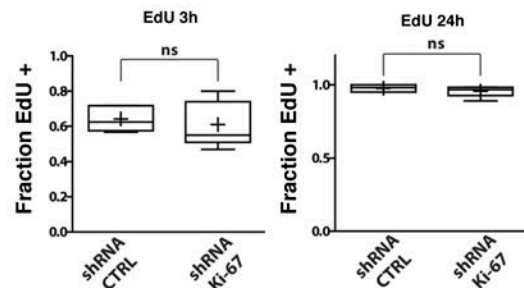

Supplement: supp [file elife_poa_e13722_Figure_5_figure_supplement_2.pdf › elife_poa_e13722_Figure_5_figure_supplement_2.pdf]

# Figure 6 – figure supplement 1

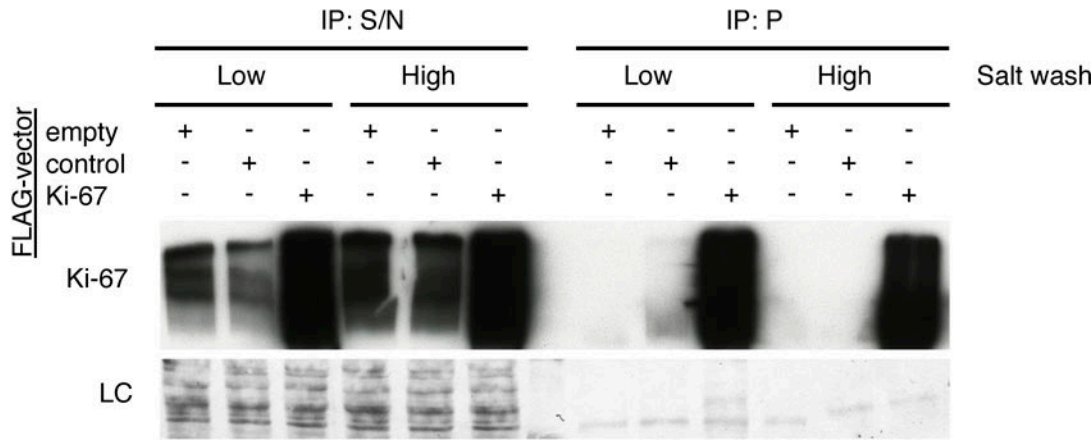

Supplement: supp [file elife_poa_e13722_Figure_6_figure_supplement_1.pdf › elife_poa_e13722_Figure_6_figure_supplement_1.pdf]

Figure 6 – figure supplement 2

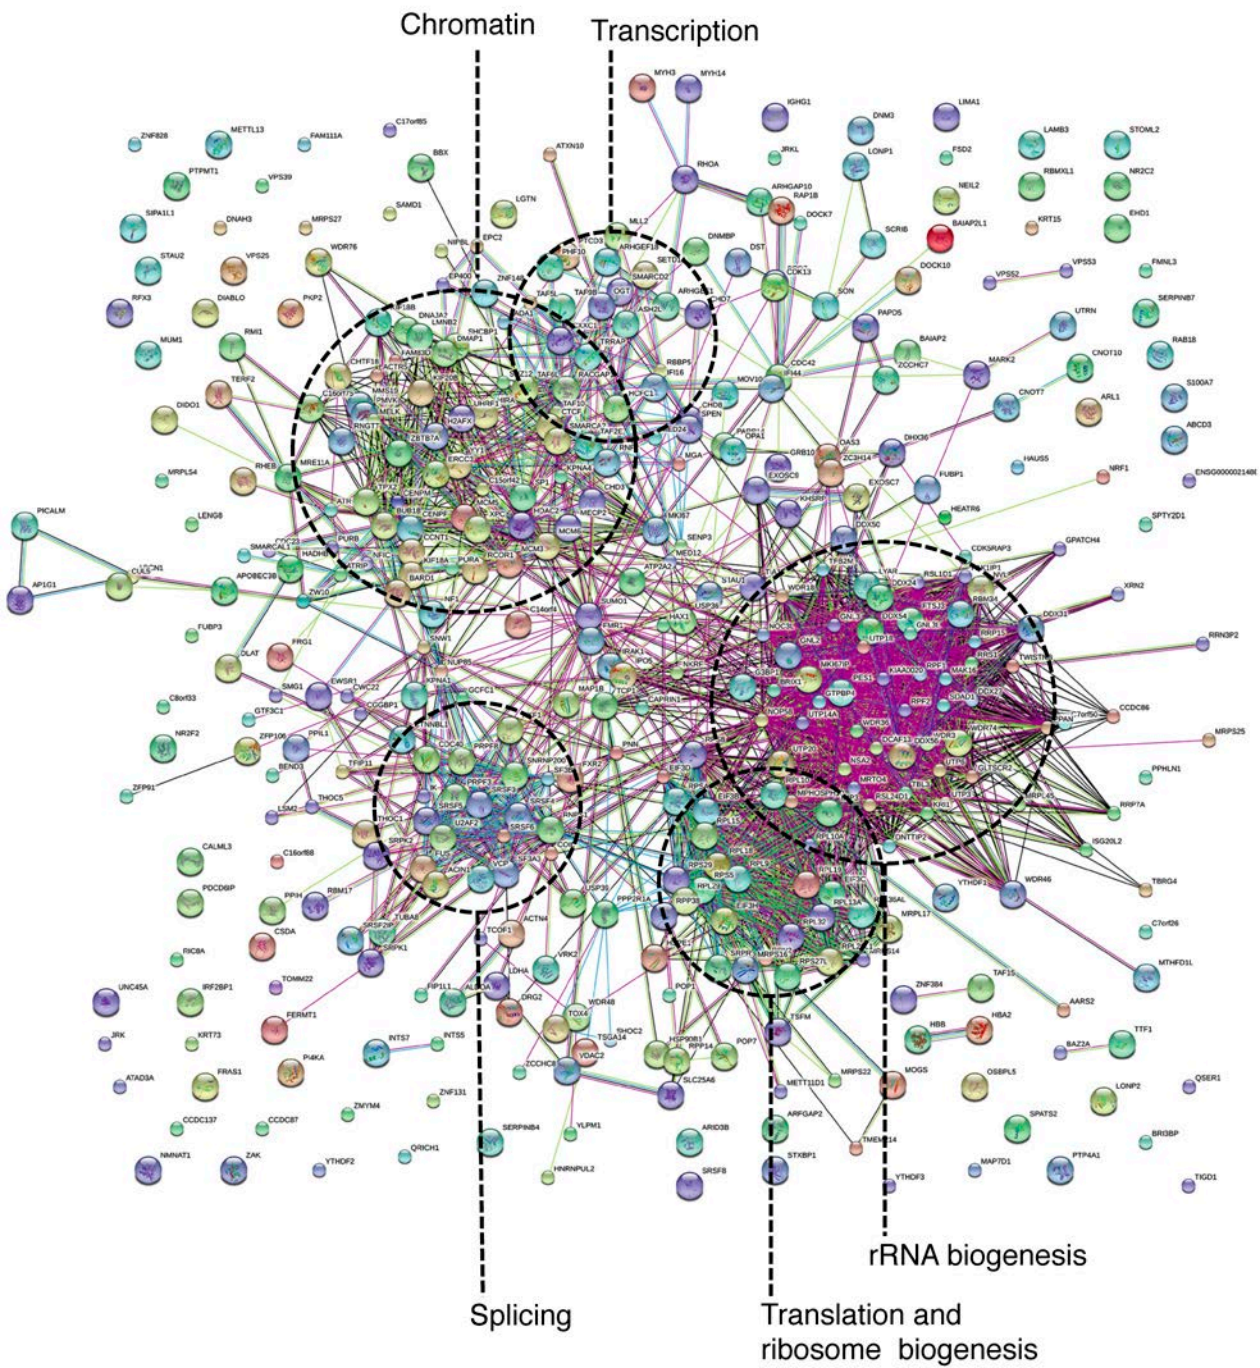

Supplement: supp [file elife_poa_e13722_Figure_6_figure_supplement_2.pdf › elife_poa_e13722_Figure_6_figure_supplement_2.pdf]

**Figure 7 – figure supplement 1**

**A**

HeLa

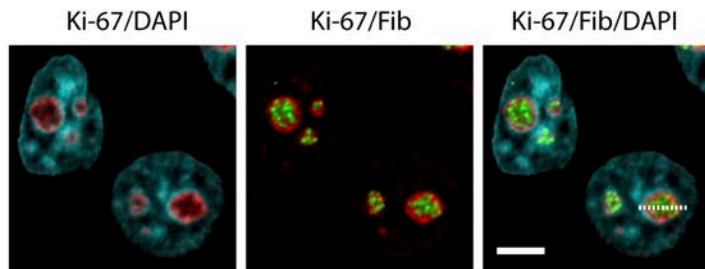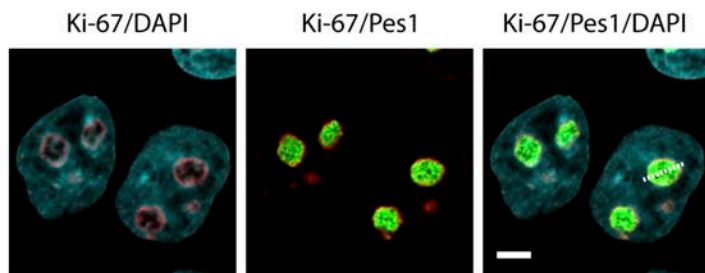

U2OS

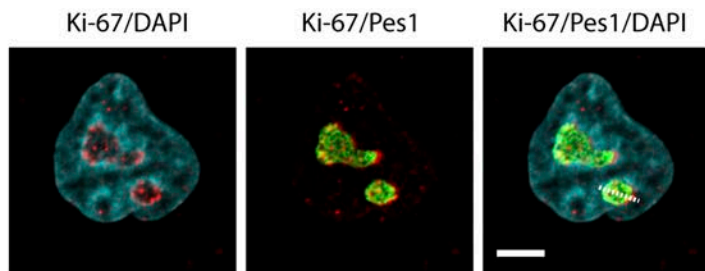

**B**

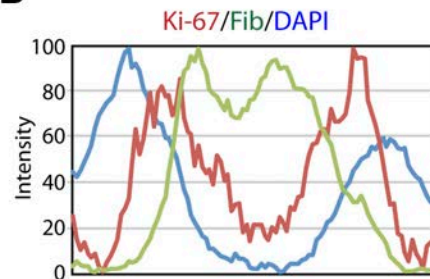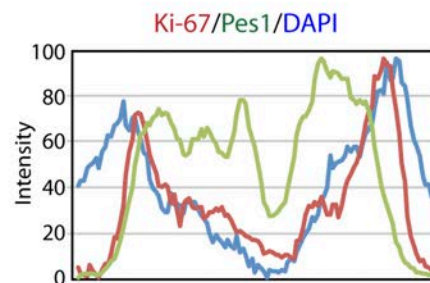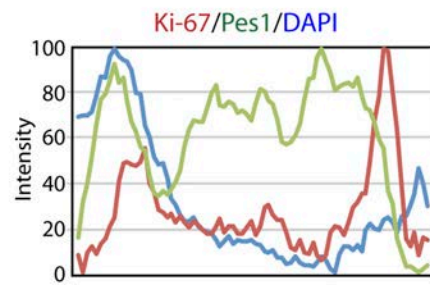

Supplement: supp [file elife_poa_e13722_Figure_7_figure_supplement_1.pdf › elife_poa_e13722_Figure_7_figure_supplement_1.pdf]

**Figure 7 – figure supplement 2**

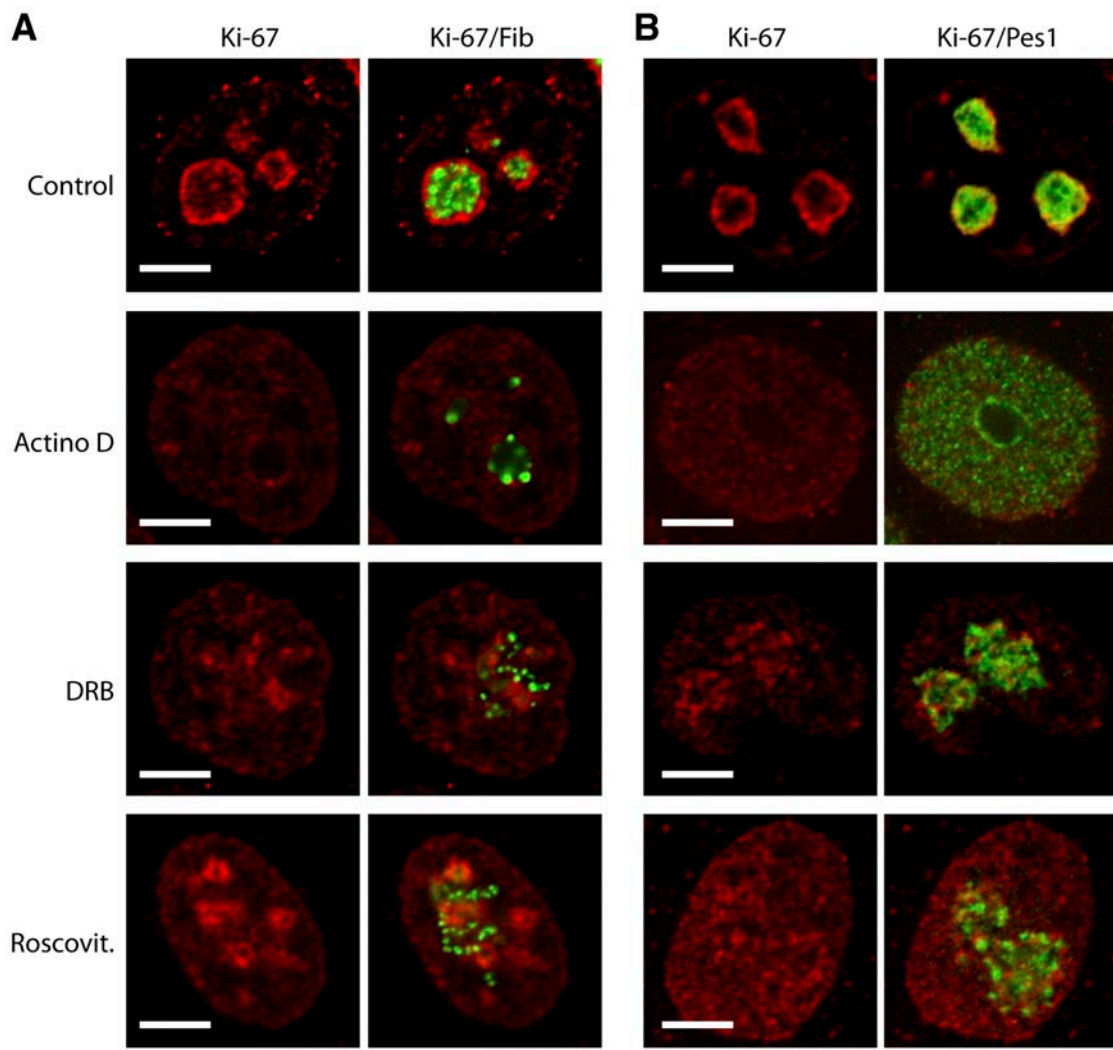

Supplement: supp [file elife_poa_e13722_Figure_7_figure_supplement_2.pdf › elife_poa_e13722_Figure_7_figure_supplement_2.pdf]

**Figure 7 – figure supplement 3**

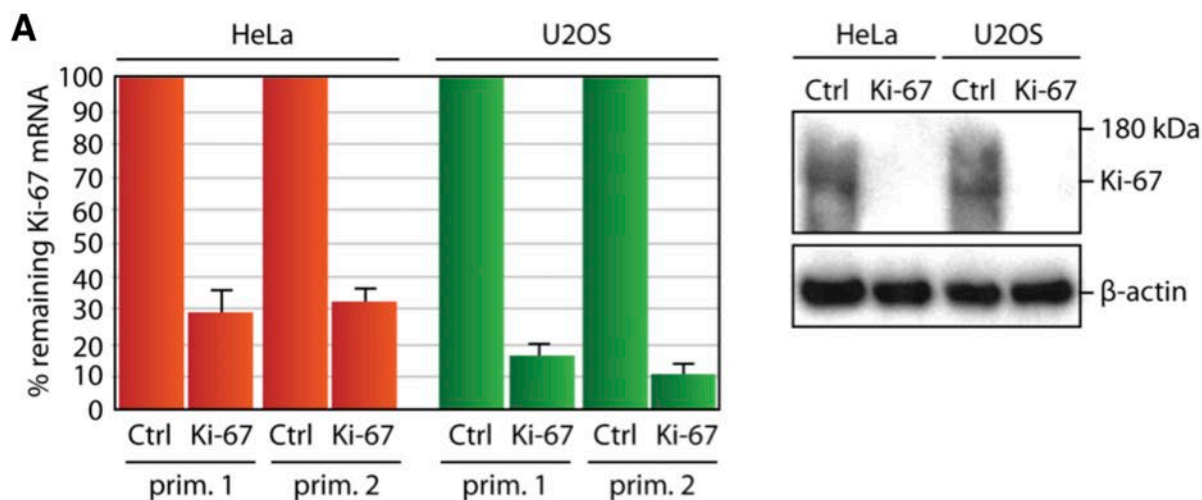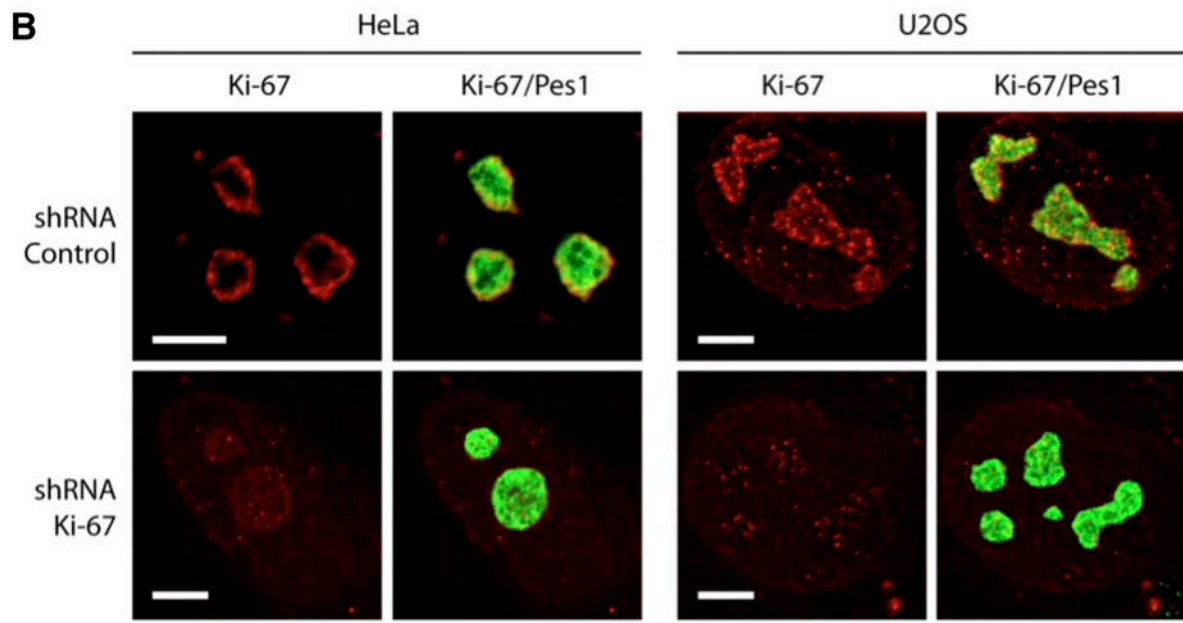

Supplement: supp [file elife_poa_e13722_Figure_7_figure_supplement_3.pdf › elife_poa_e13722_Figure_7_figure_supplement_3.pdf]

# Figure 8 – figure supplement 1

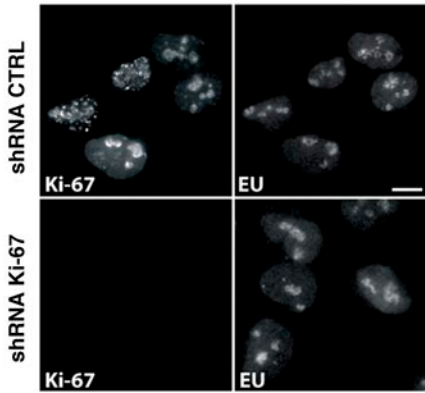

Supplement: supp [file elife_poa_e13722_Figure_8_figure_supplement_1.pdf › elife_poa_e13722_Figure_8_figure_supplement_1.pdf]

**Figure 8 – figure supplement 2**

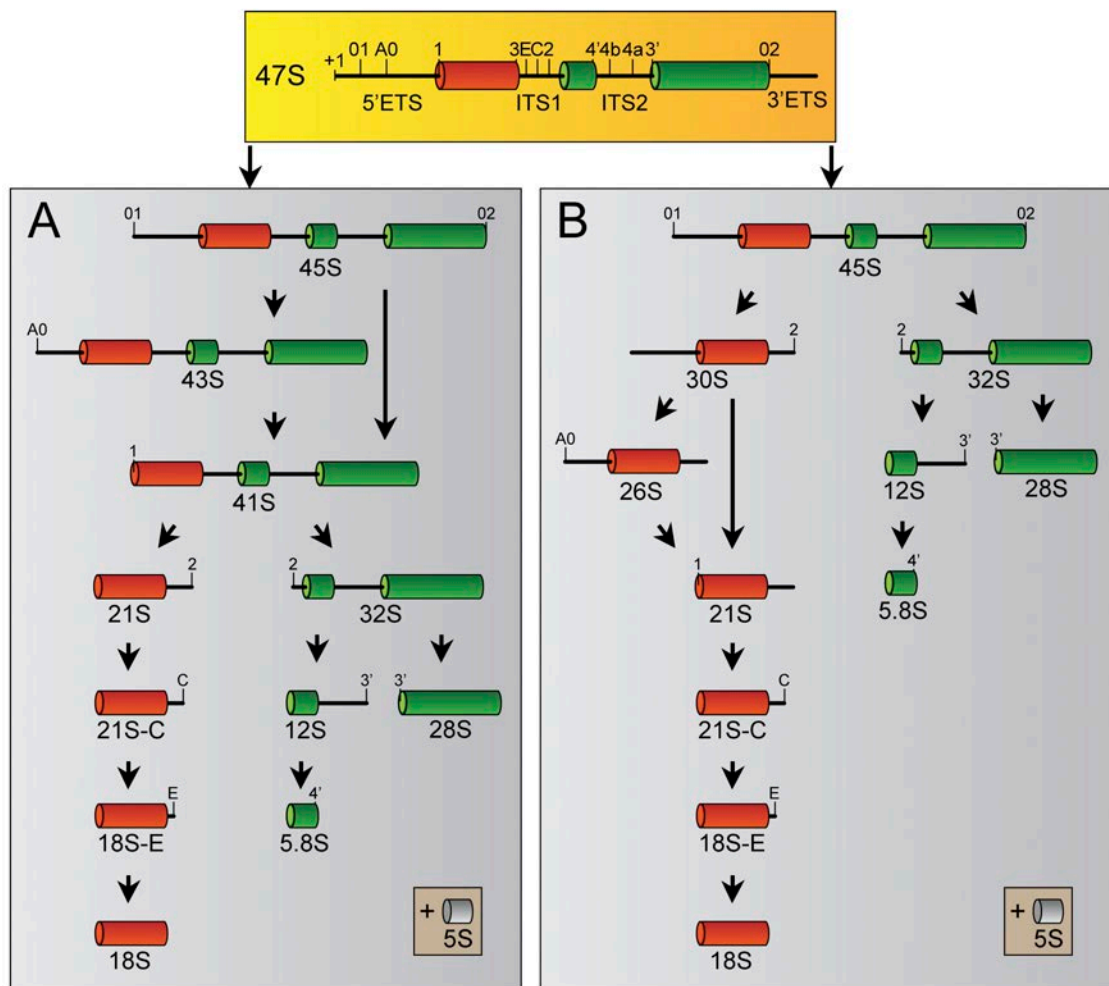

Supplement: supp [file elife_poa_e13722_Figure_8_figure_supplement_2.pdf › elife_poa_e13722_Figure_8_figure_supplement_2.pdf]

# Figure 9 – figure supplement 1

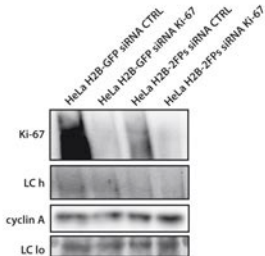

Supplement: supp [file elife_poa_e13722_Figure_9_figure_supplement_1.pdf › elife_poa_e13722_Figure_9_figure_supplement_1.pdf]
